# Supplementary material for: Genome-wide analysis of 102,084 migraine cases identifies 123 risk loci and subtype-specific risk alleles
Source: bioRxiv or medRxiv preprint supplement (doi:10.1101/2021.01.20.21249647), 2021-01-25

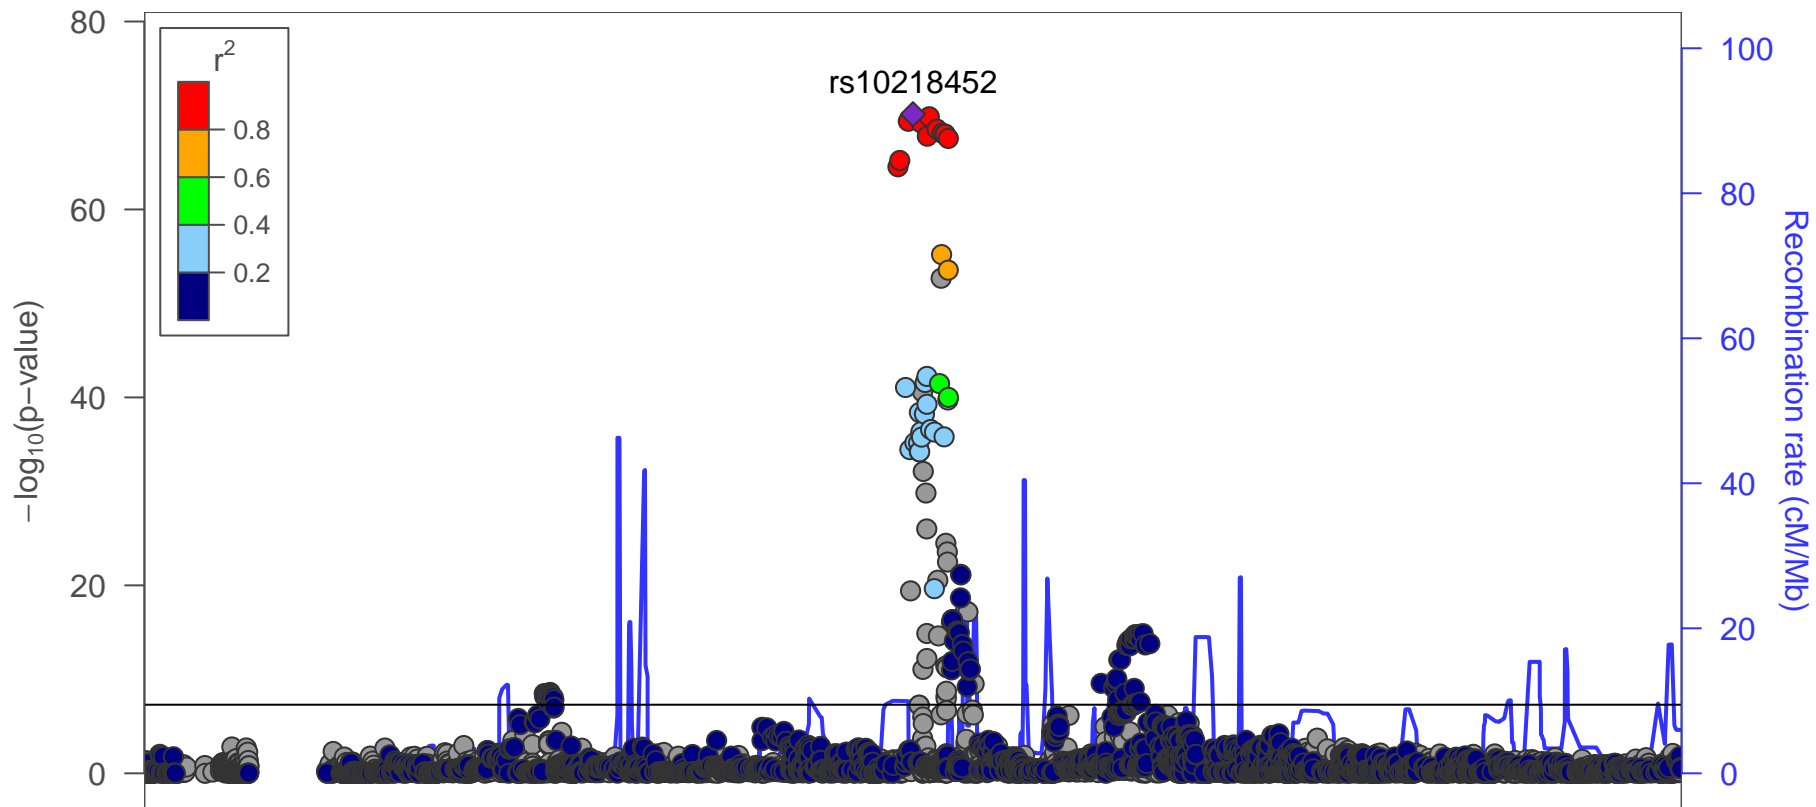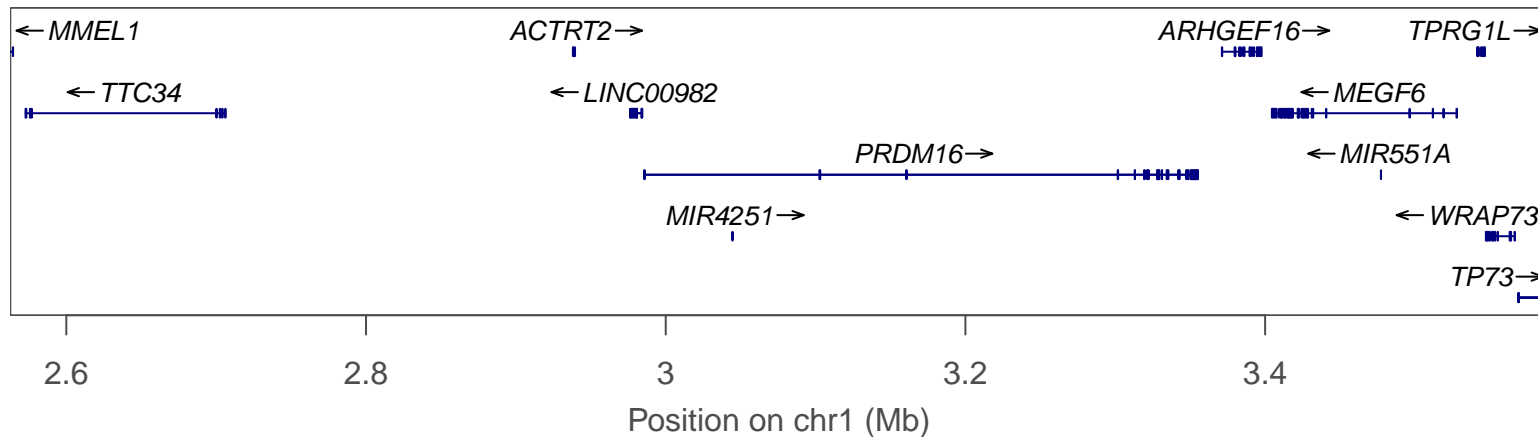

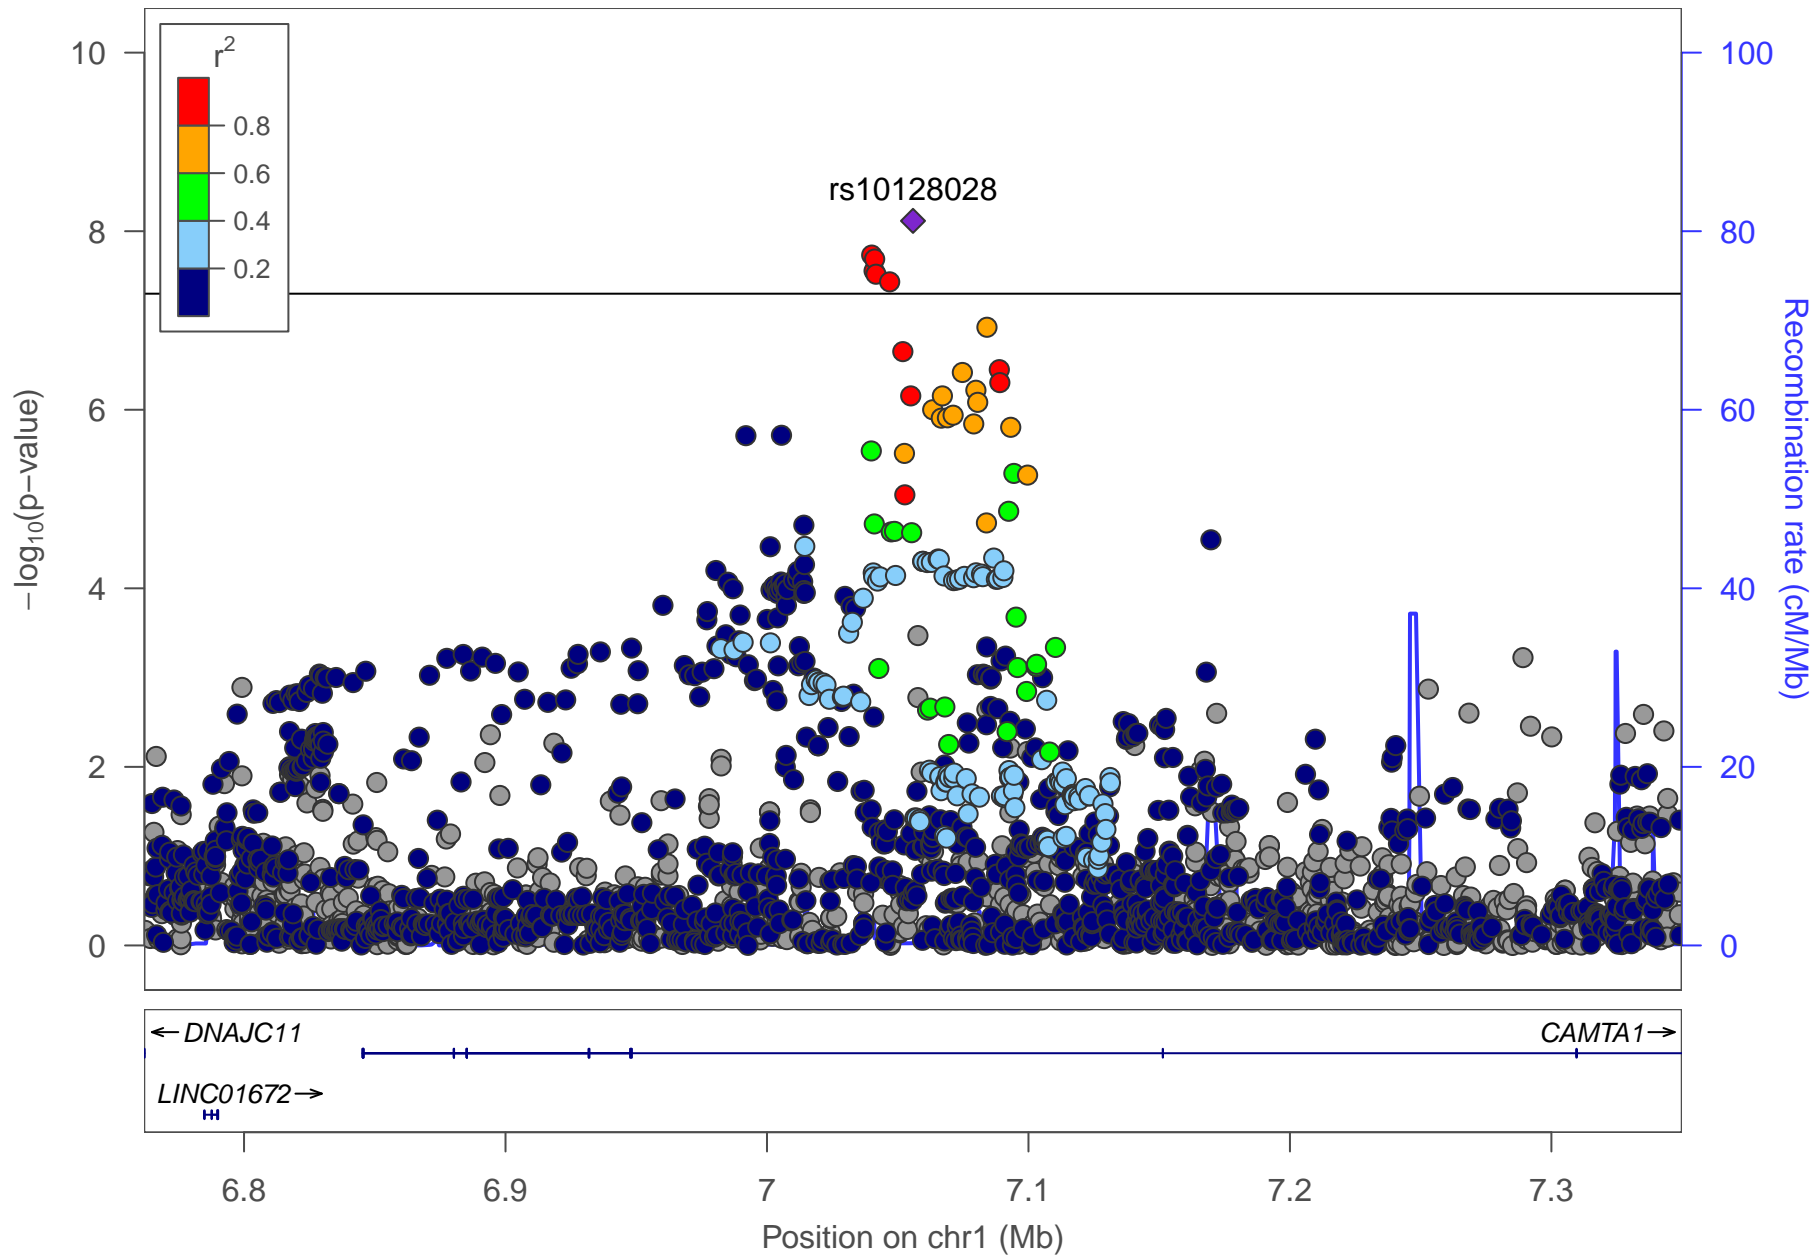

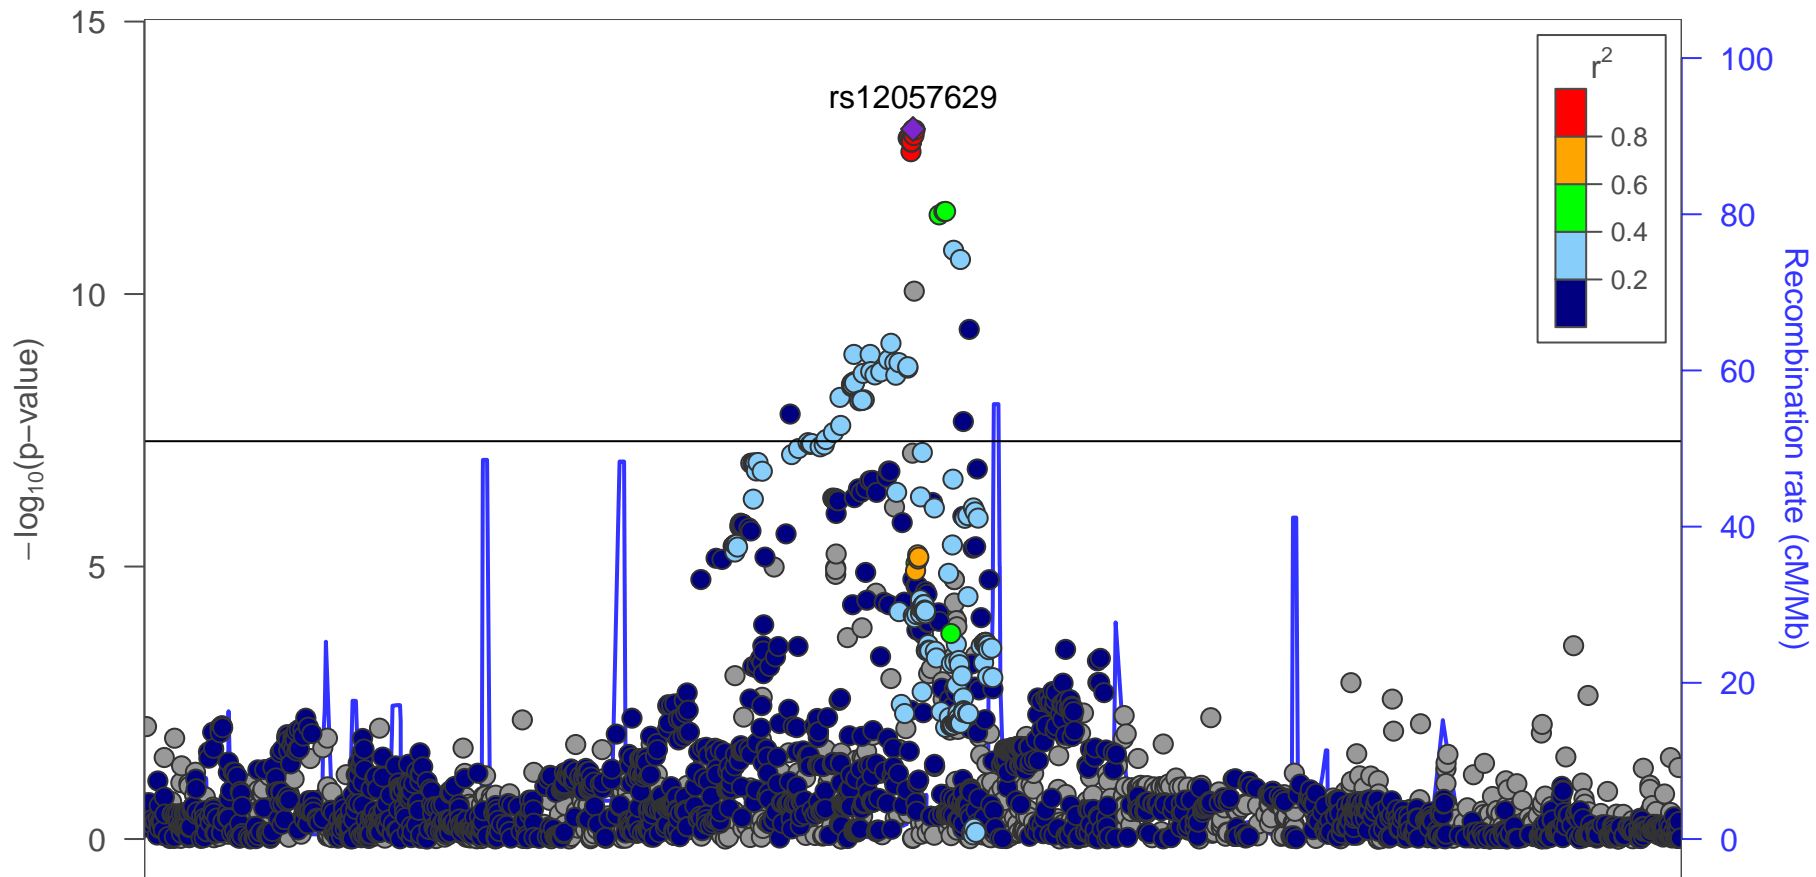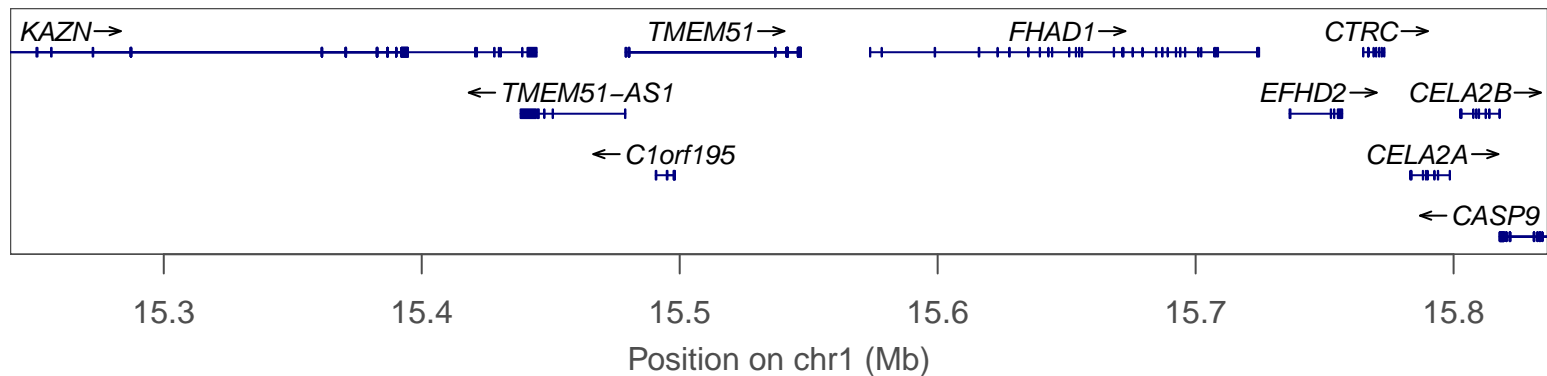

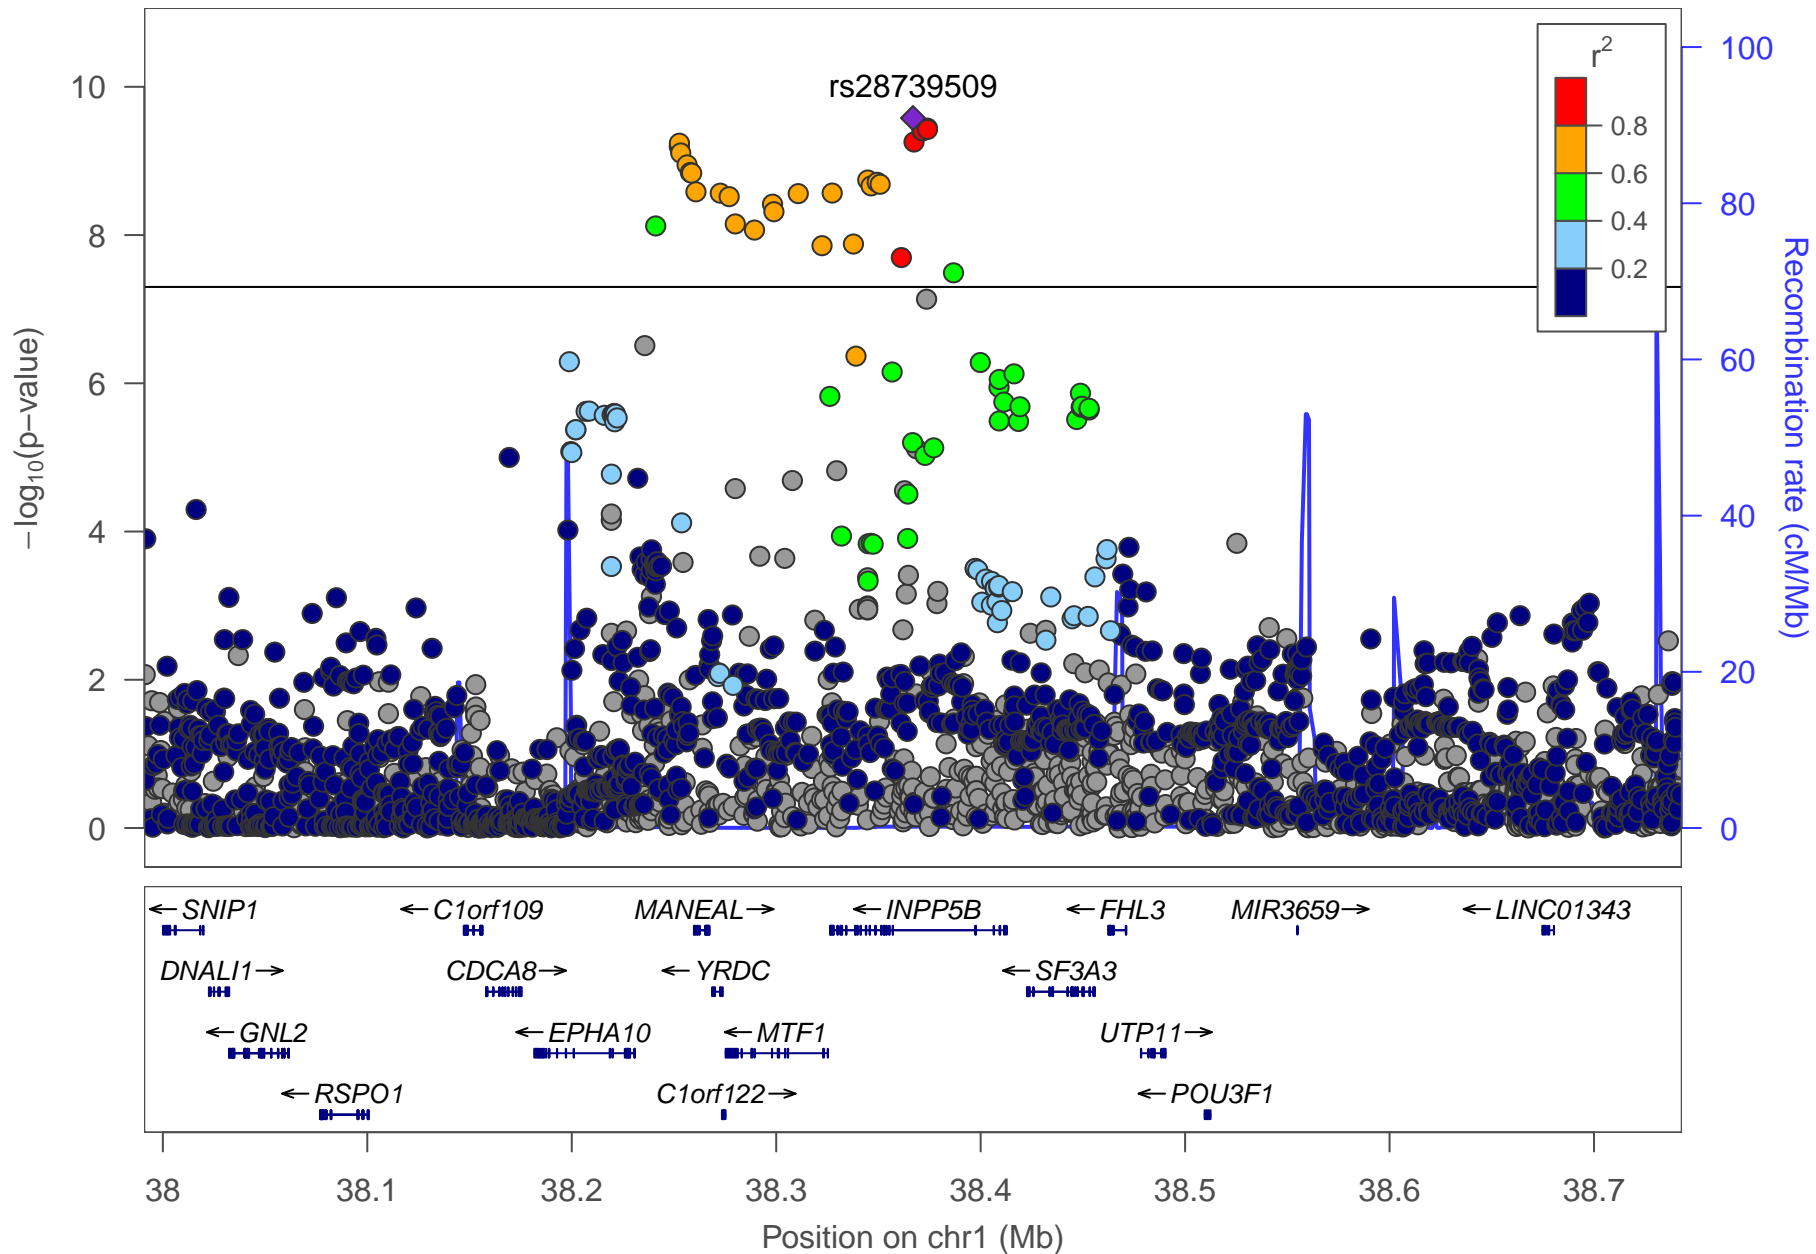

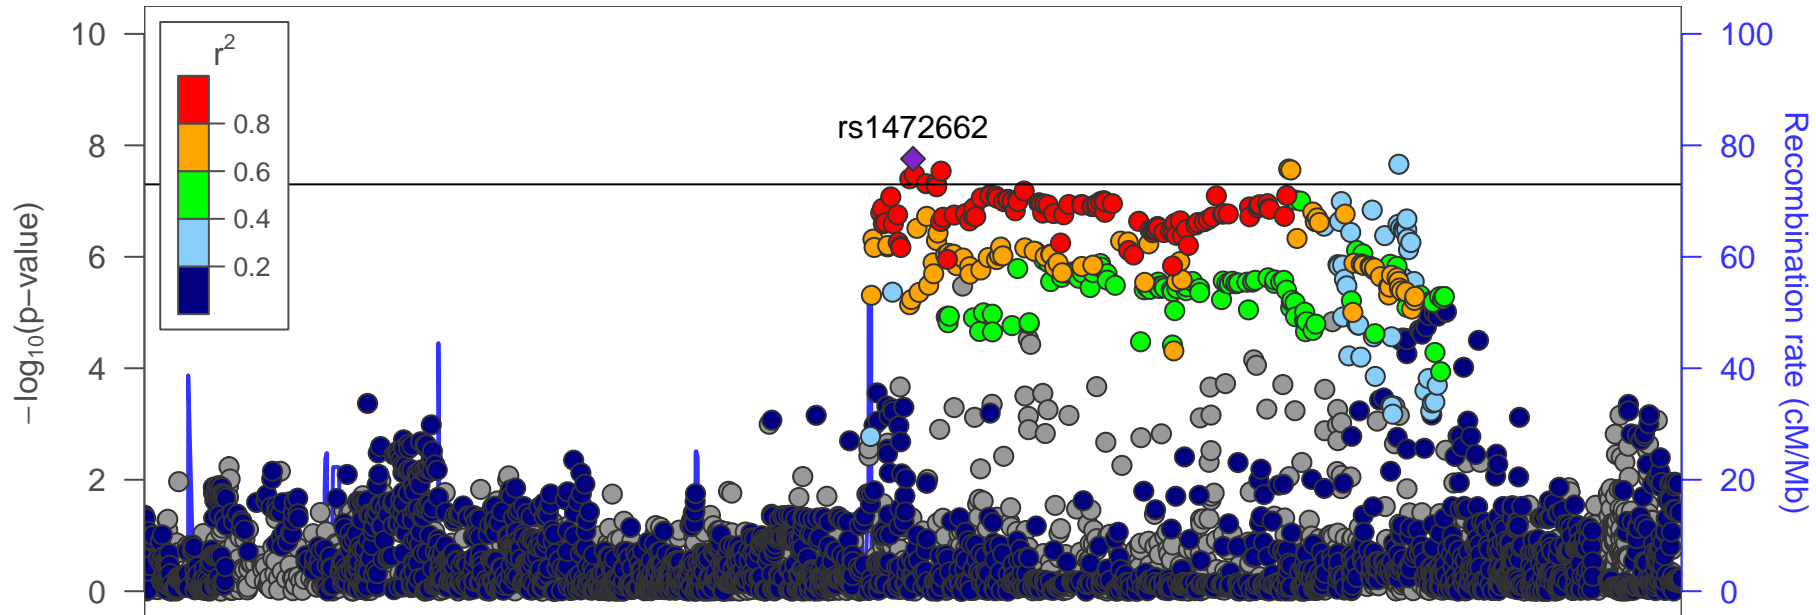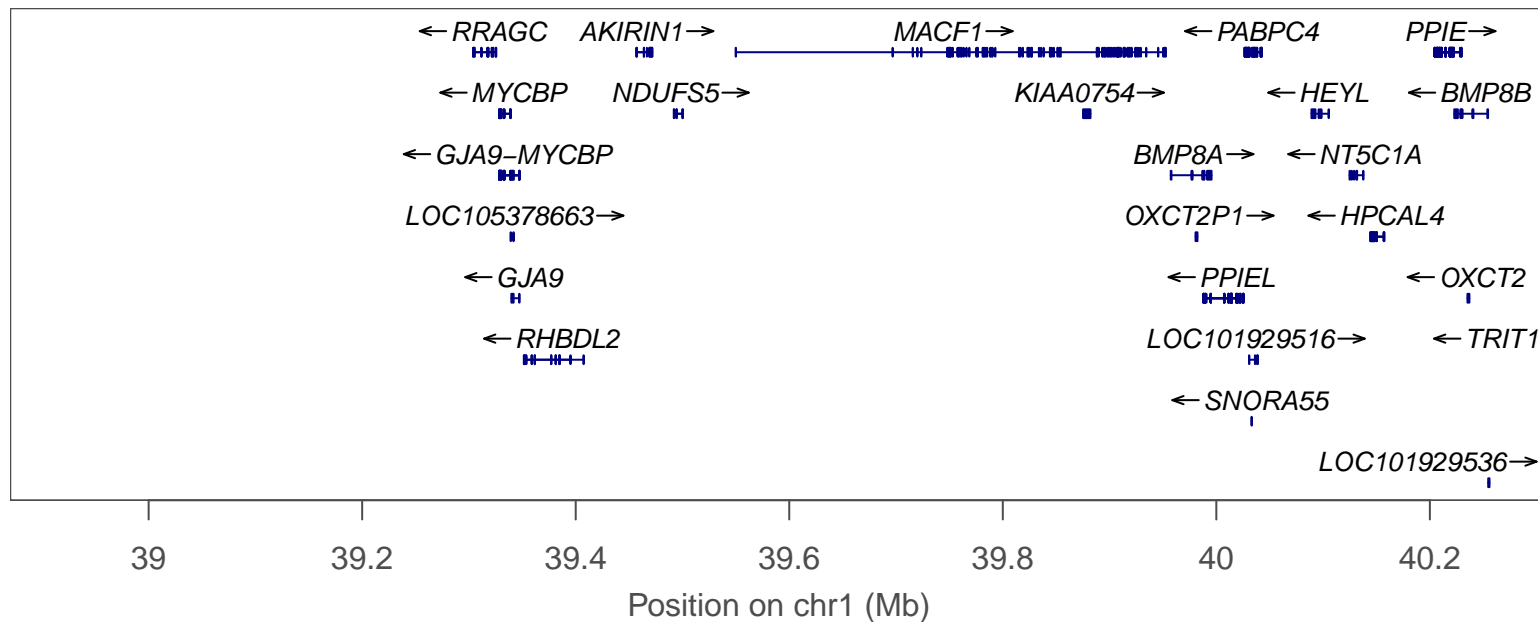

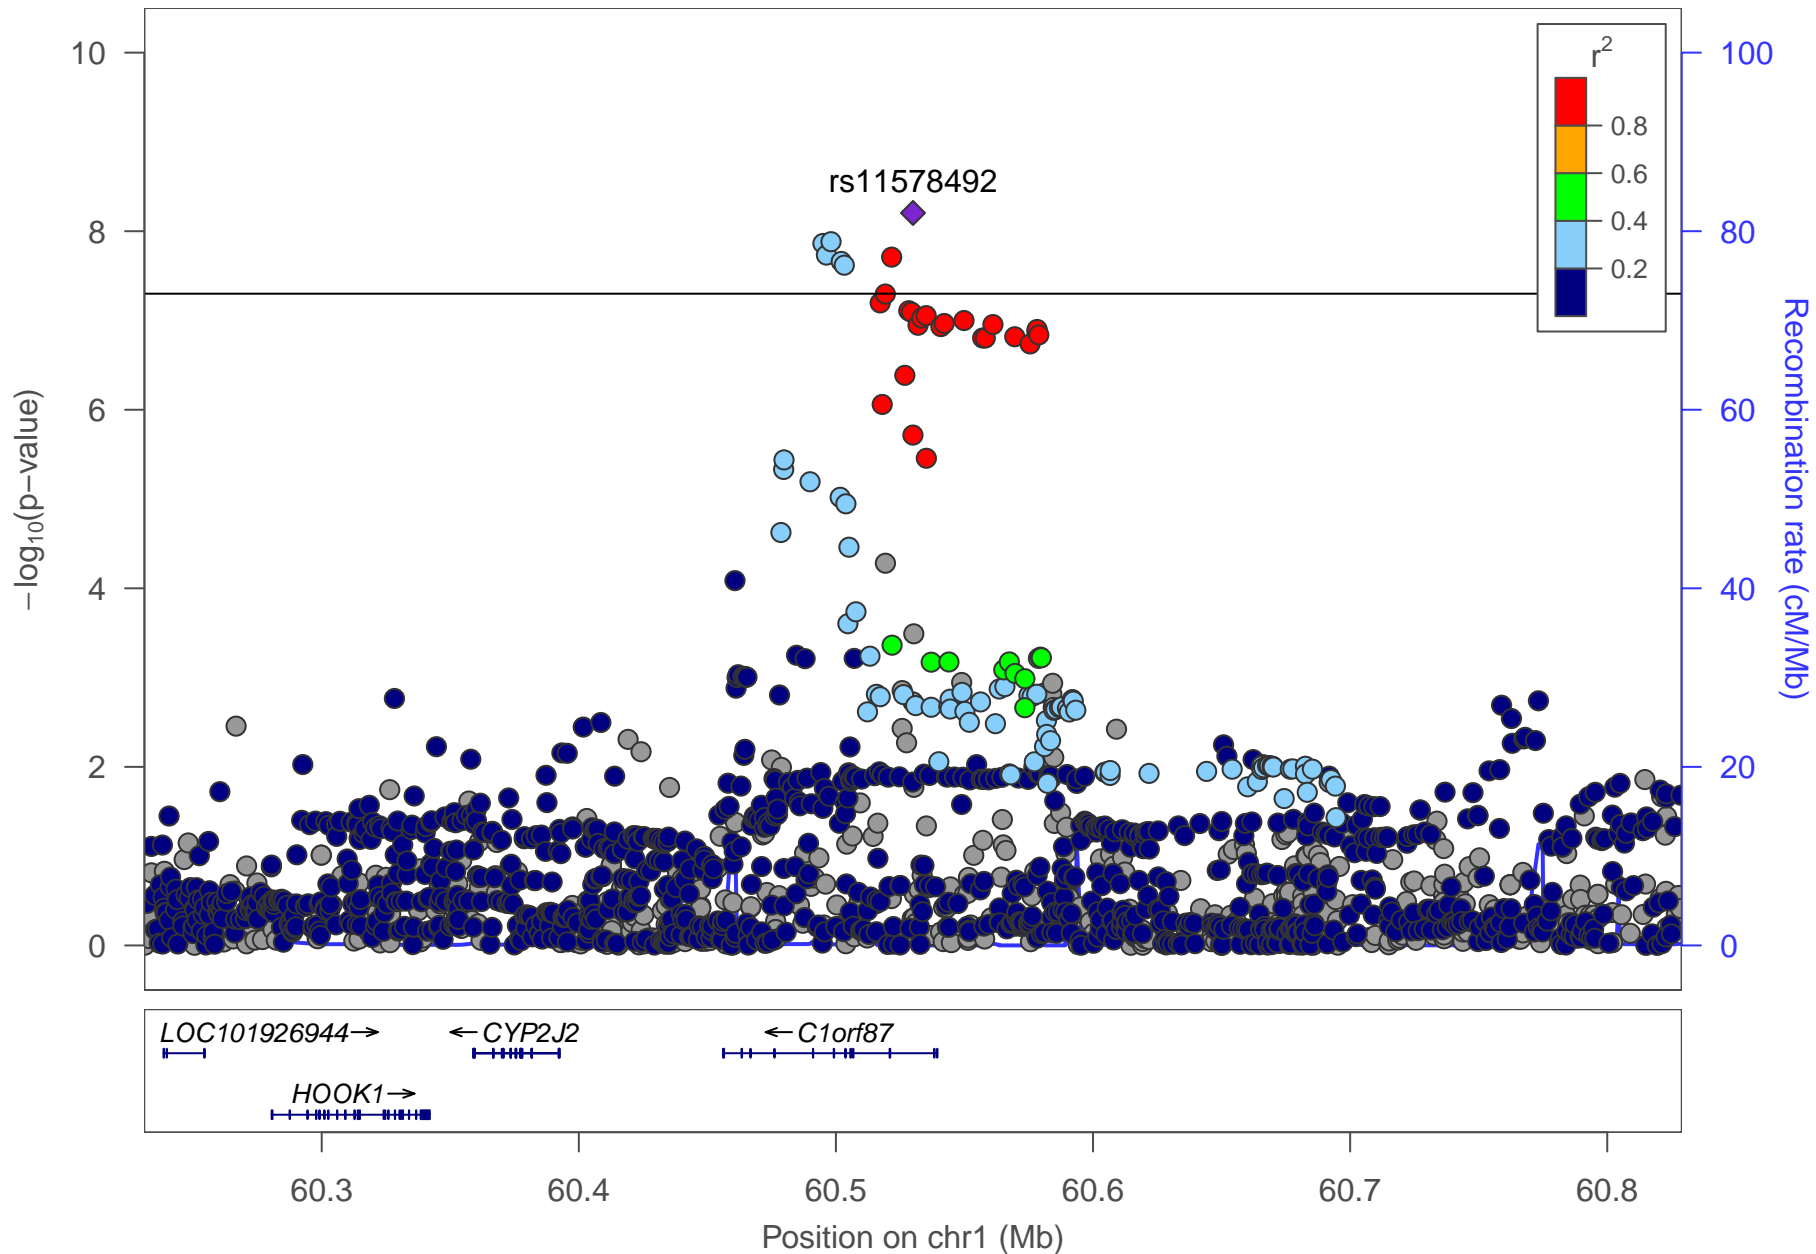

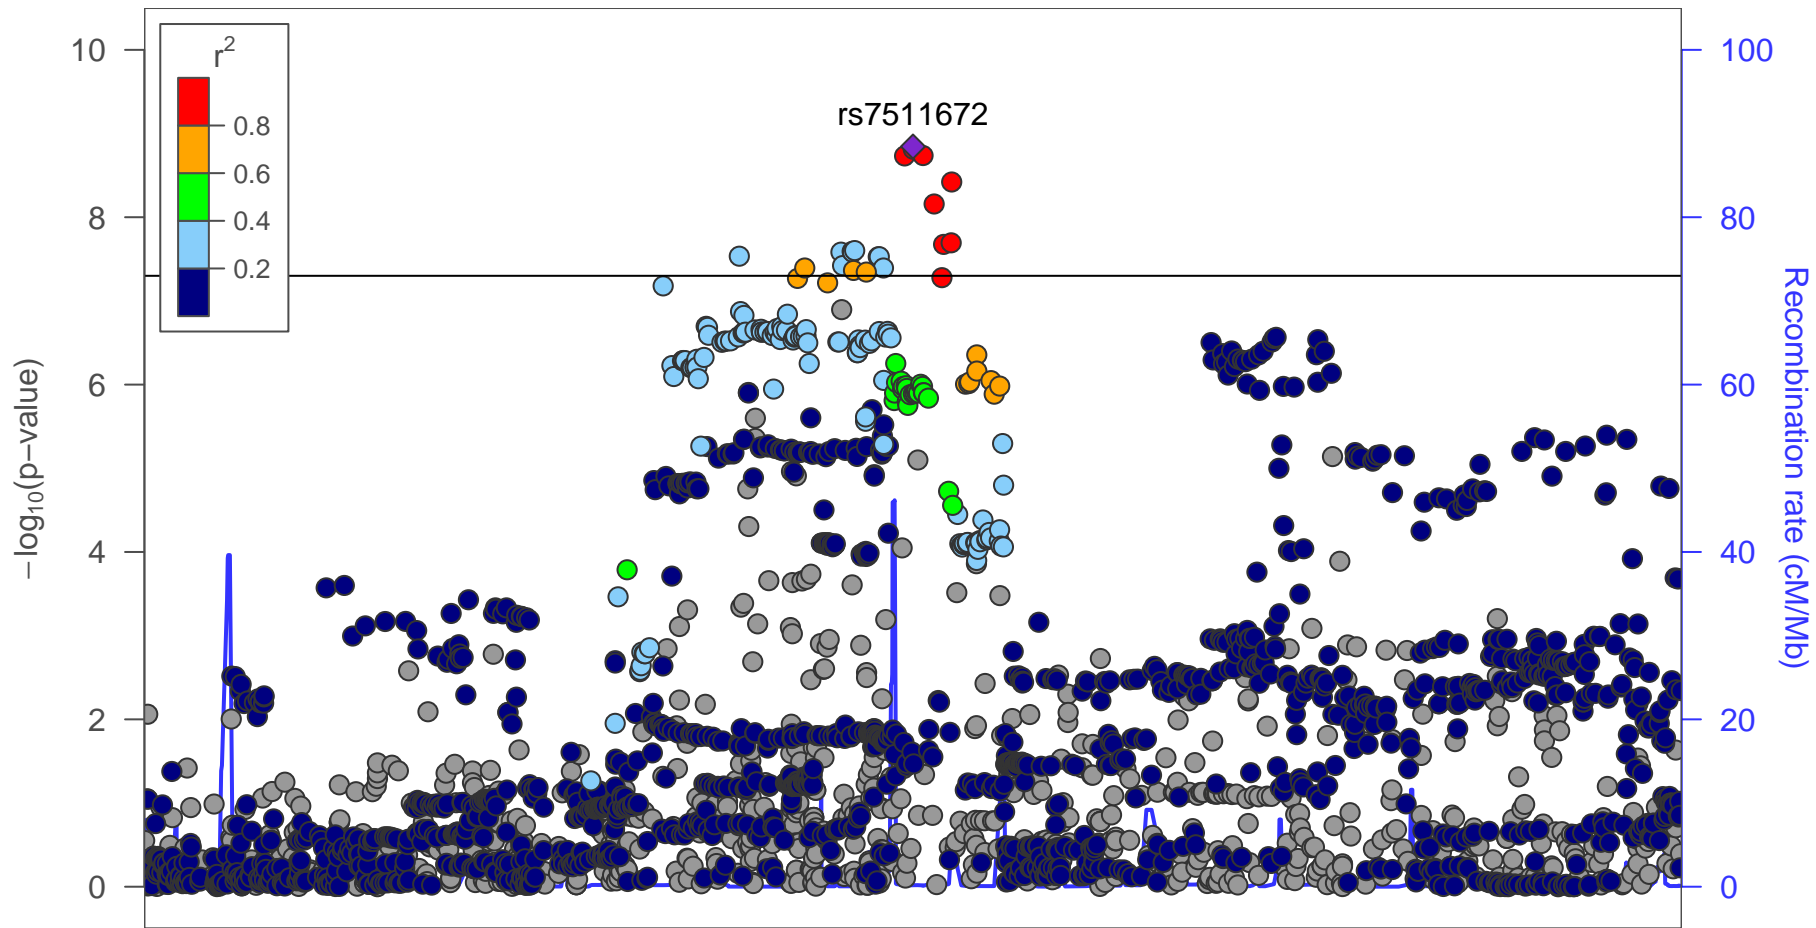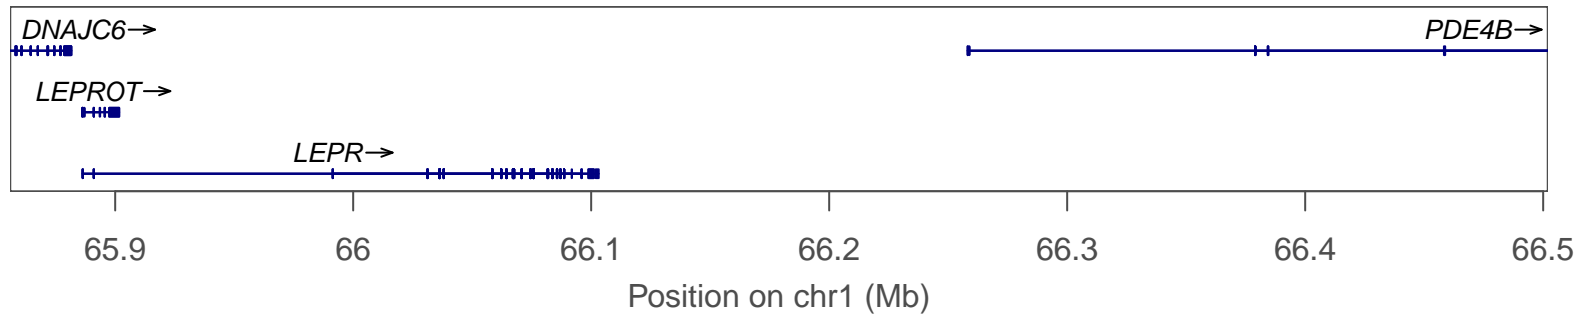

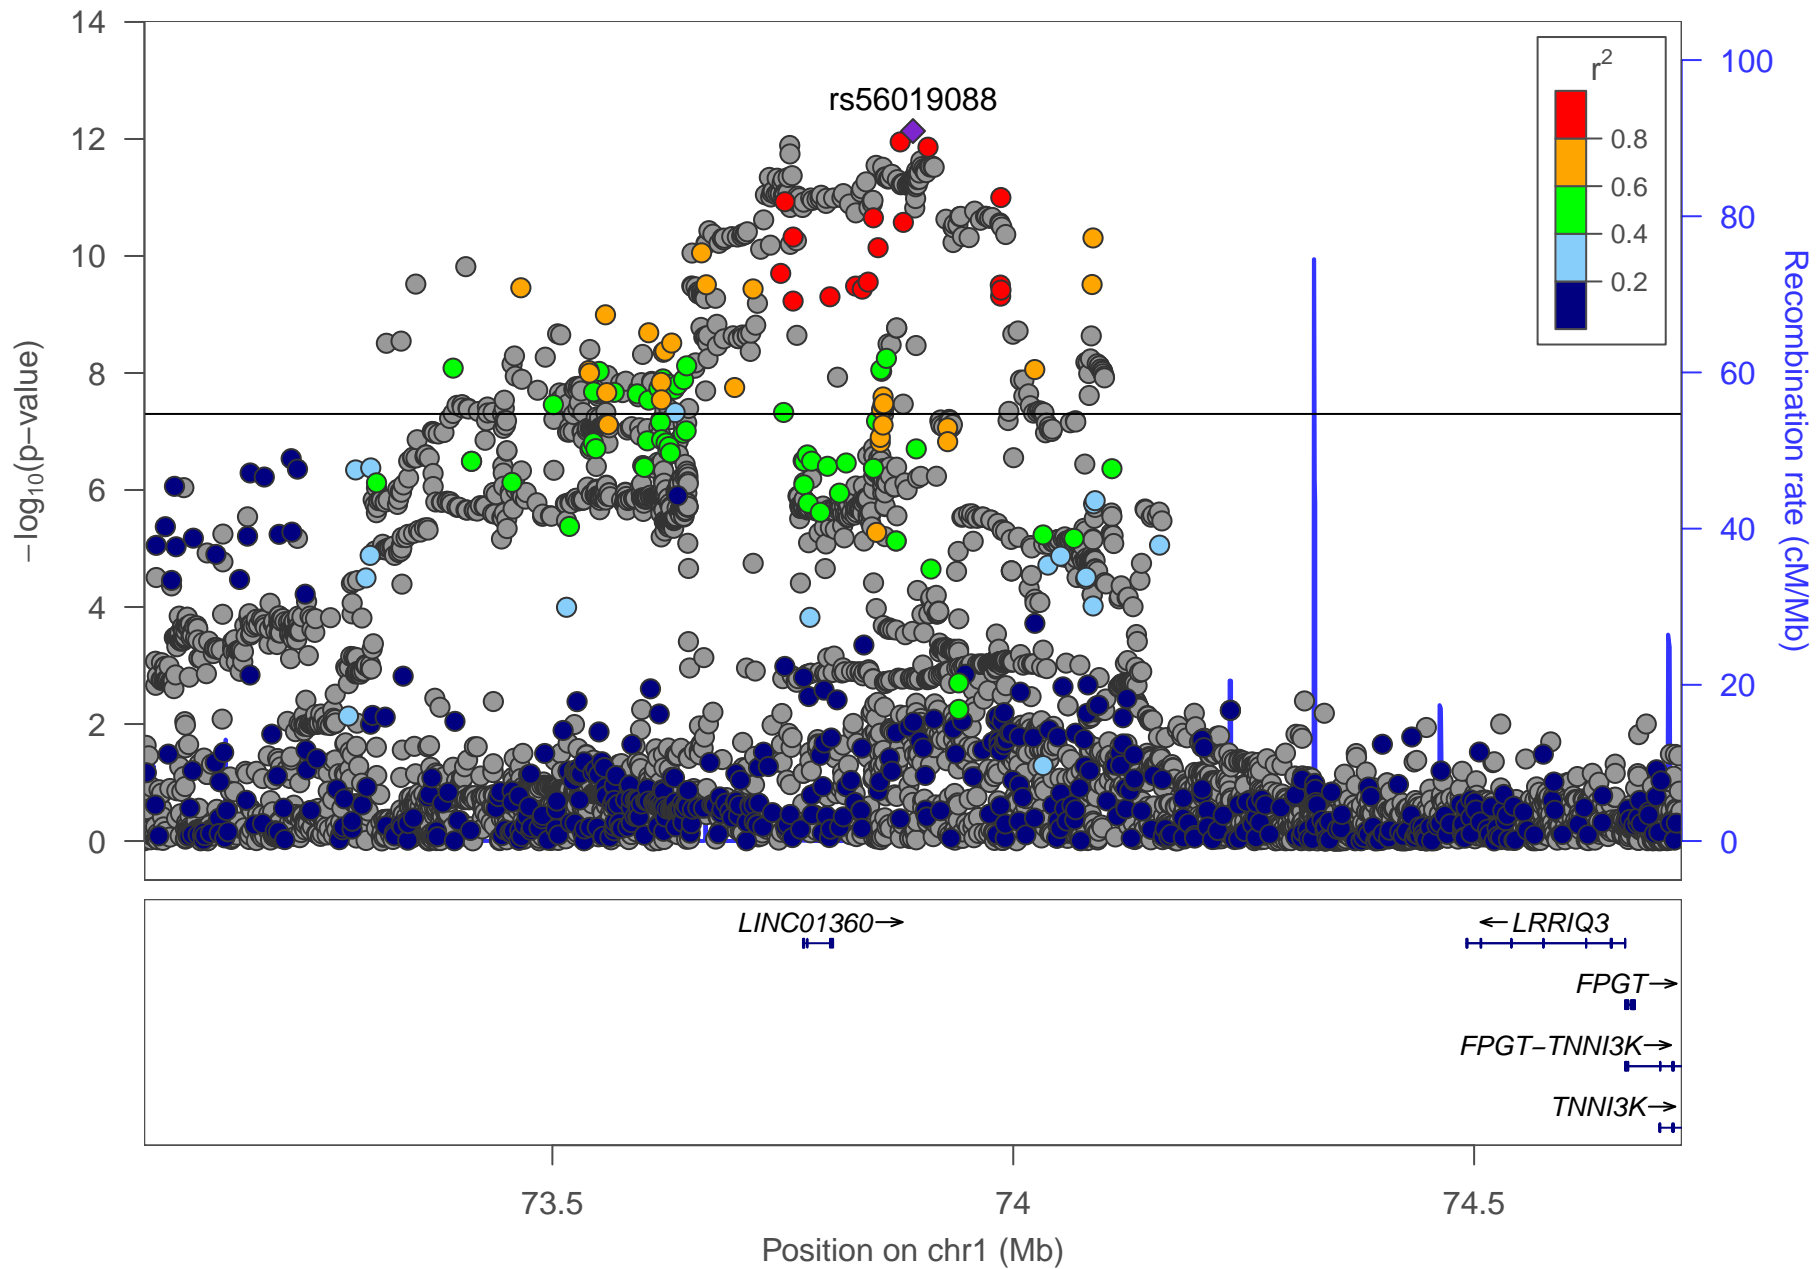



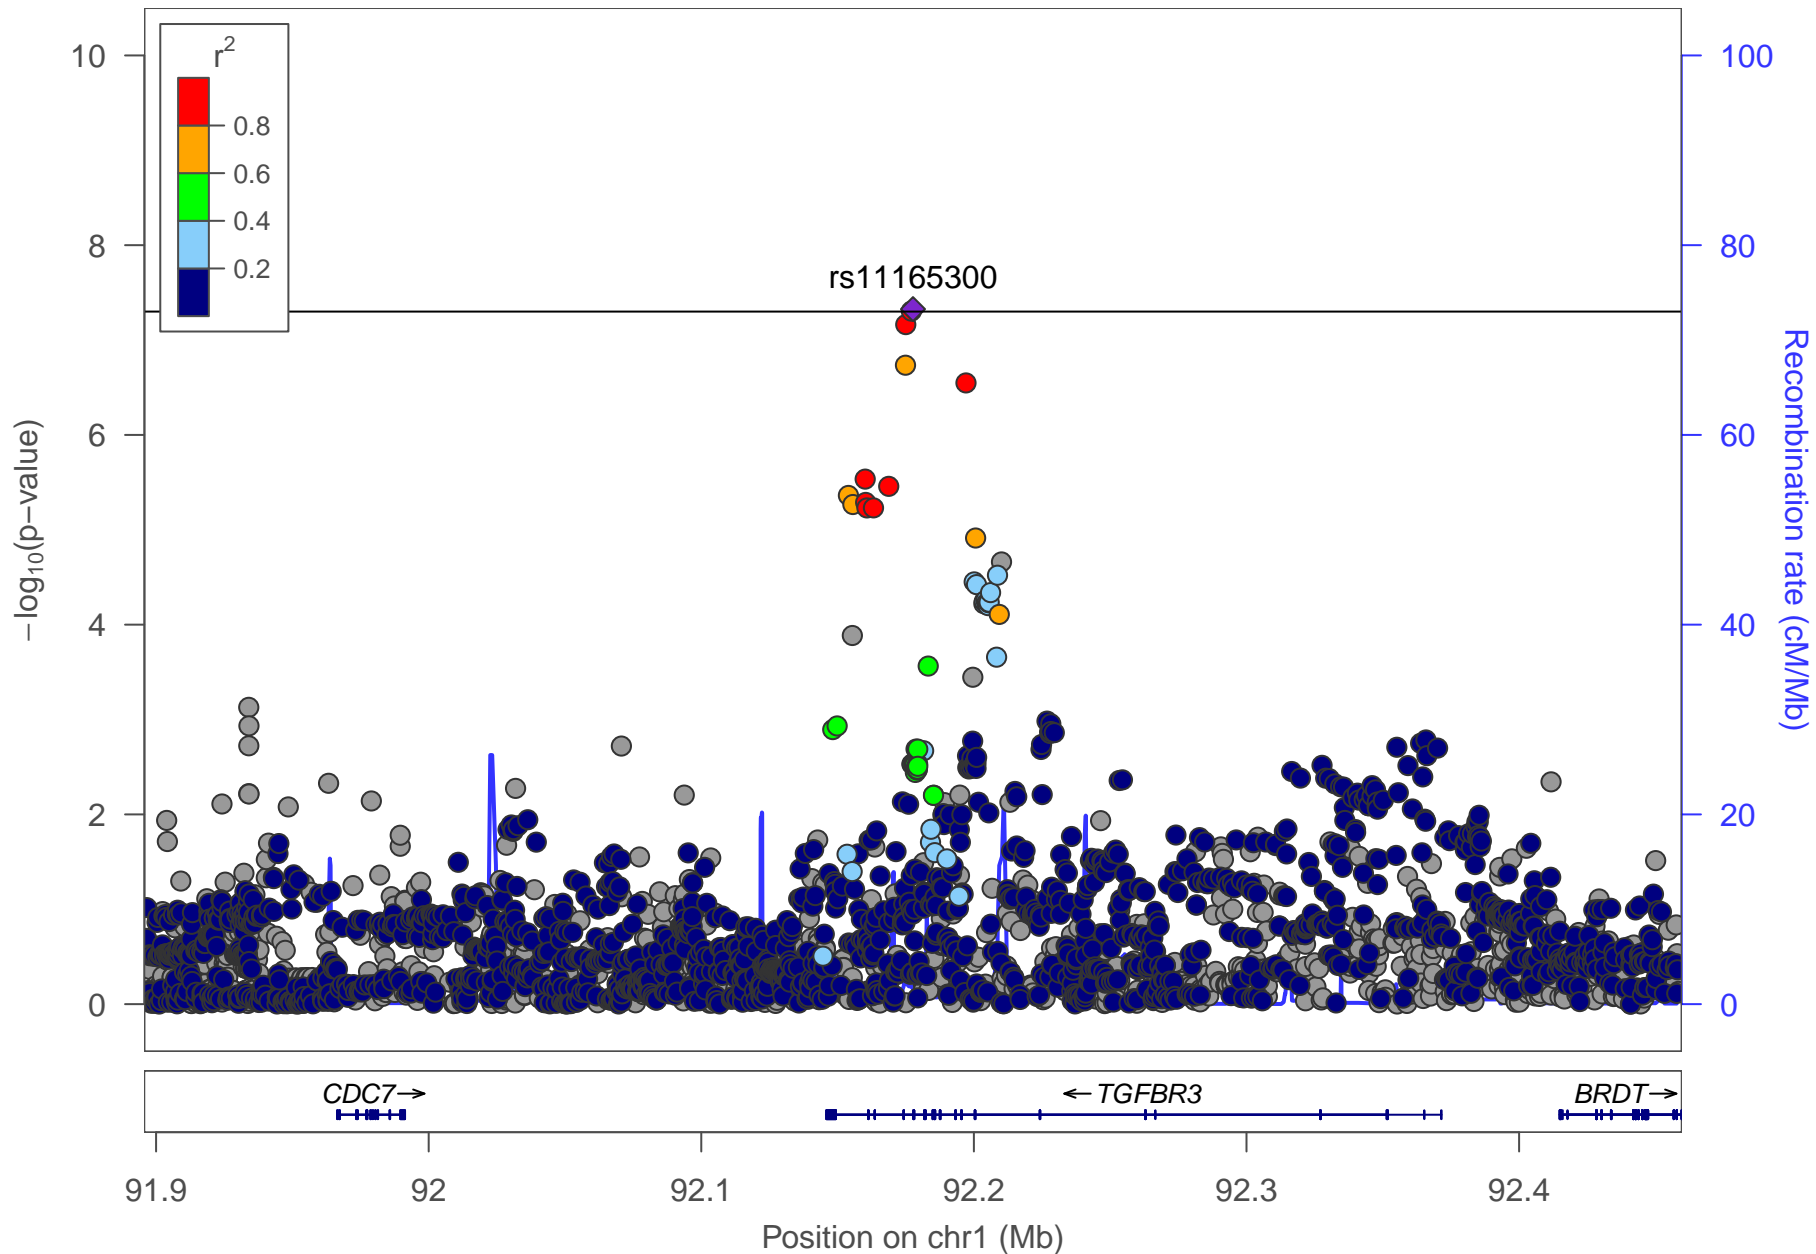

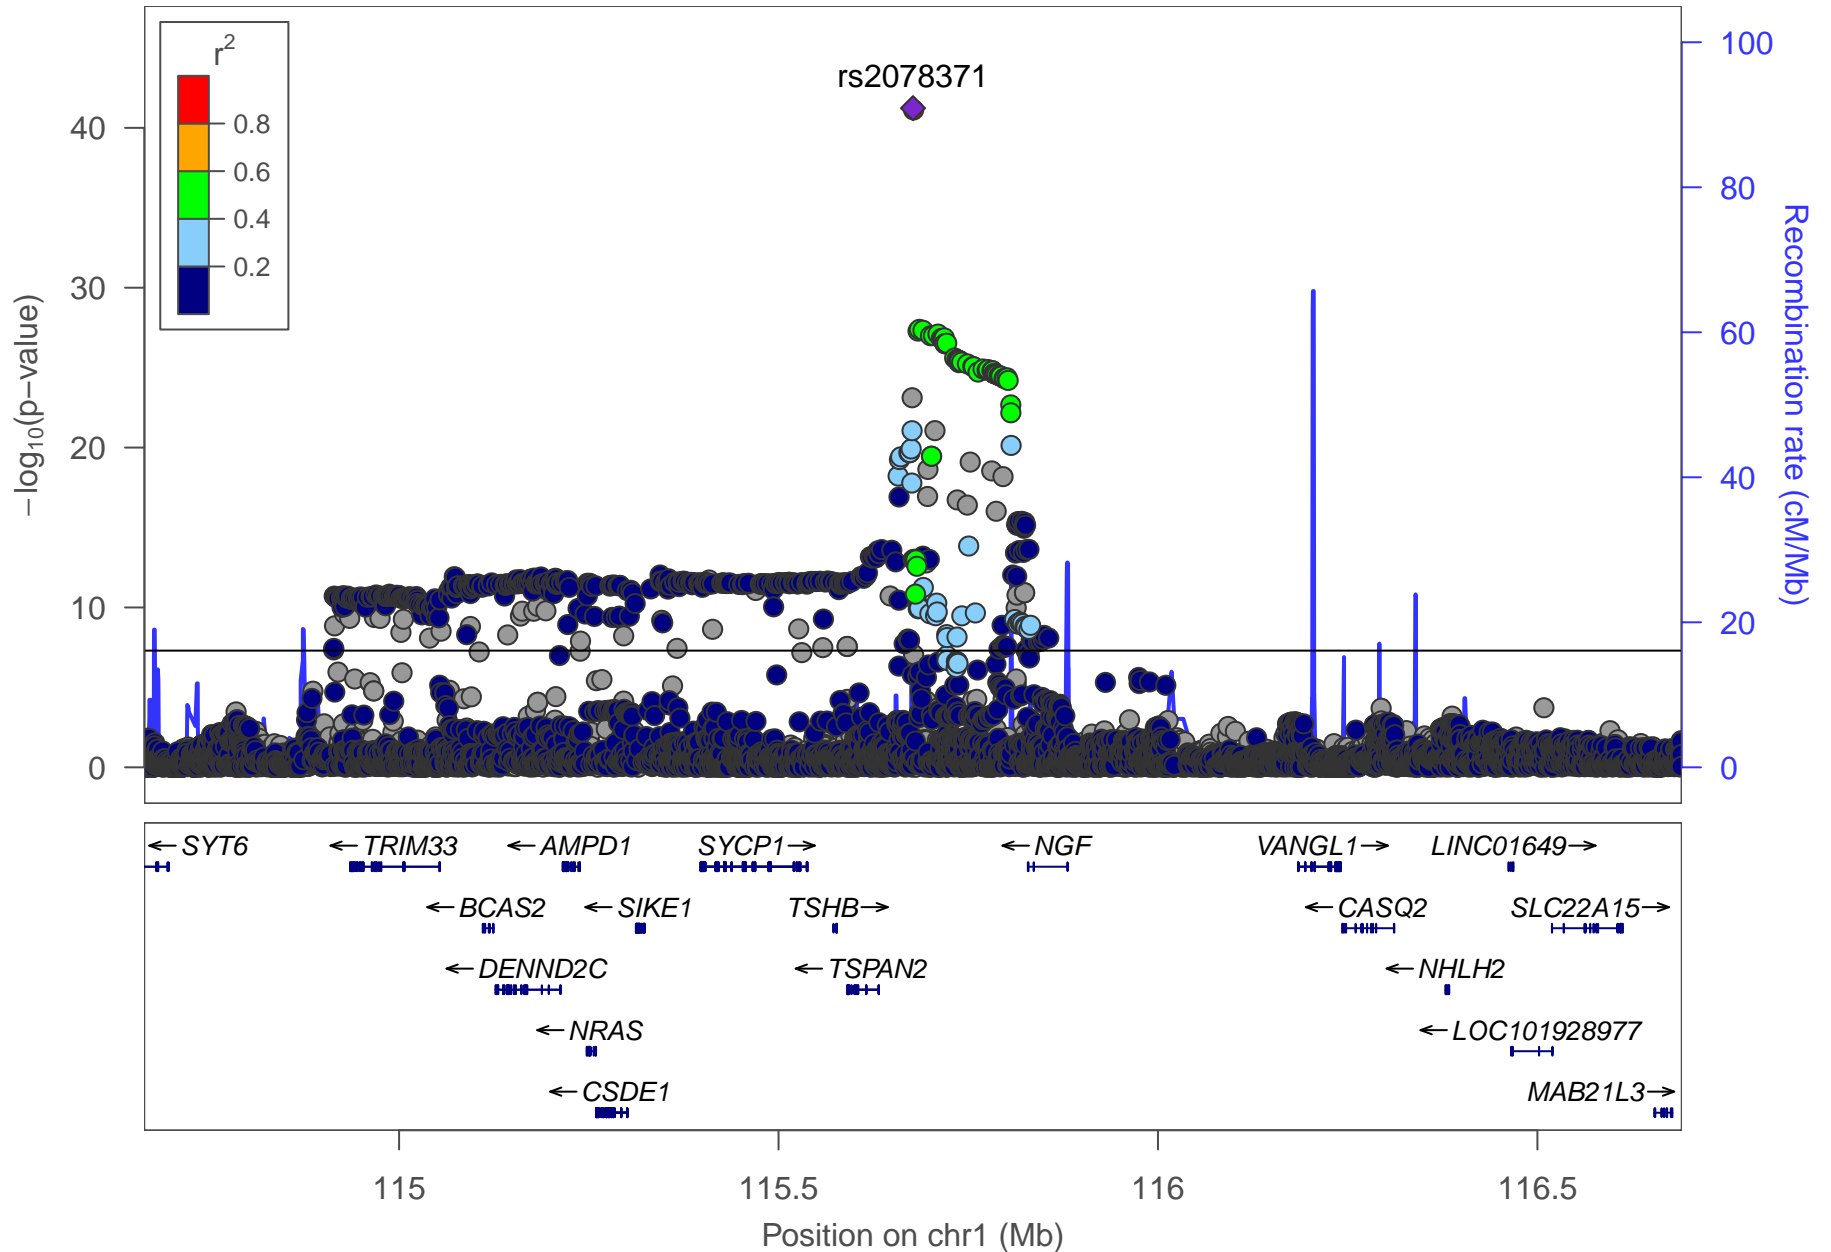

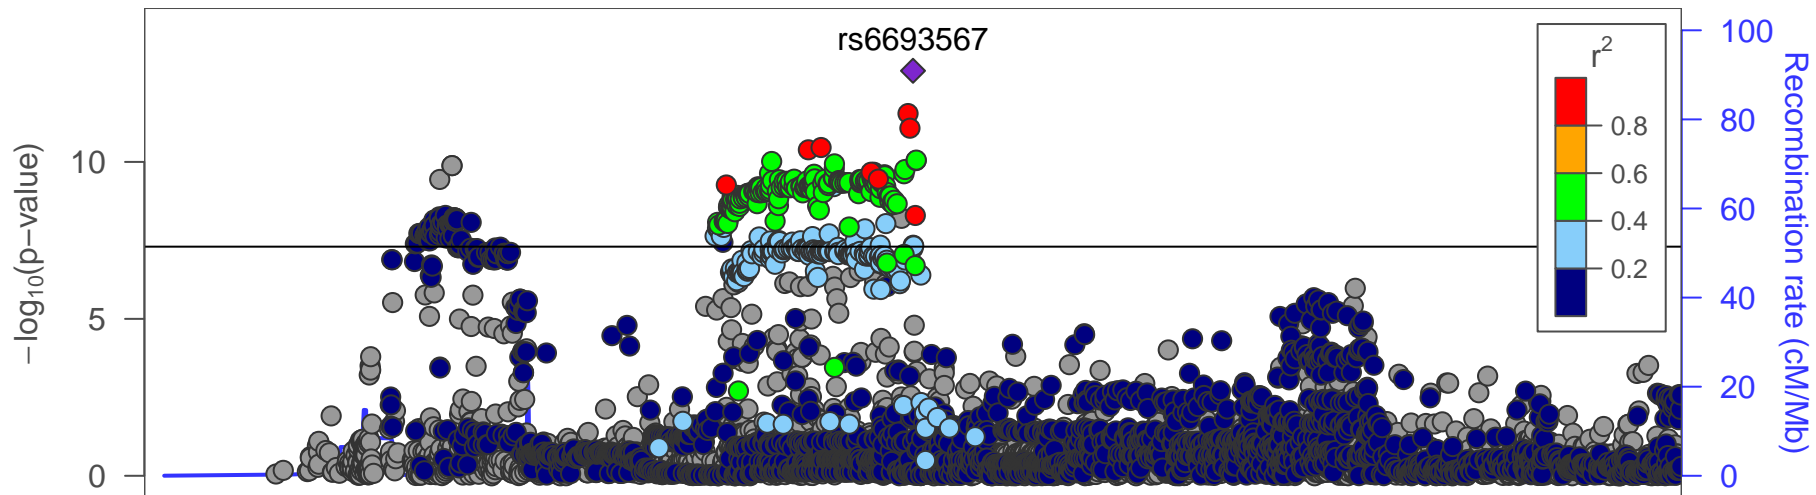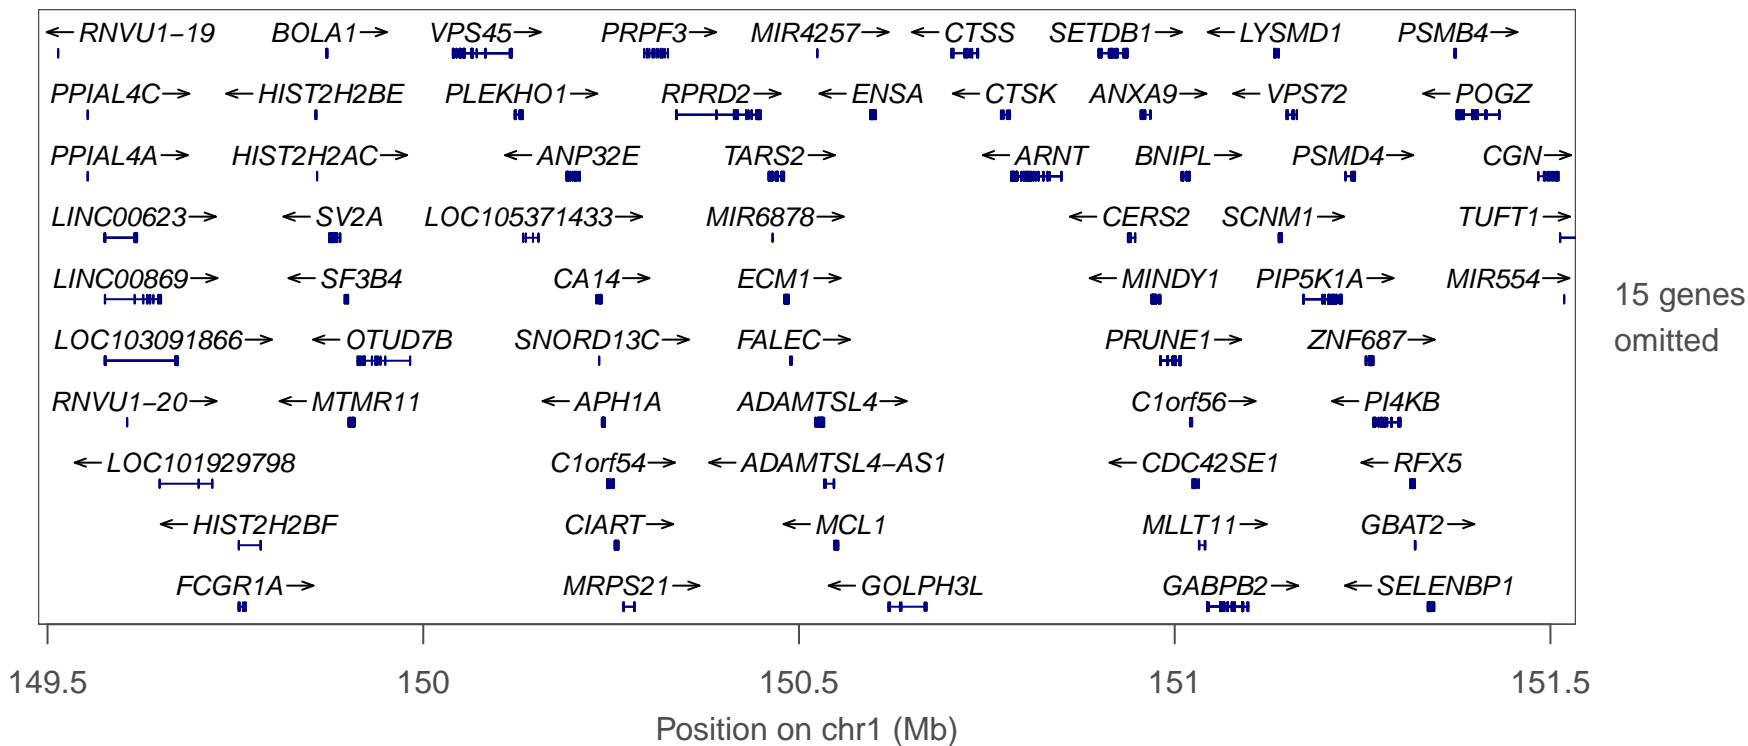

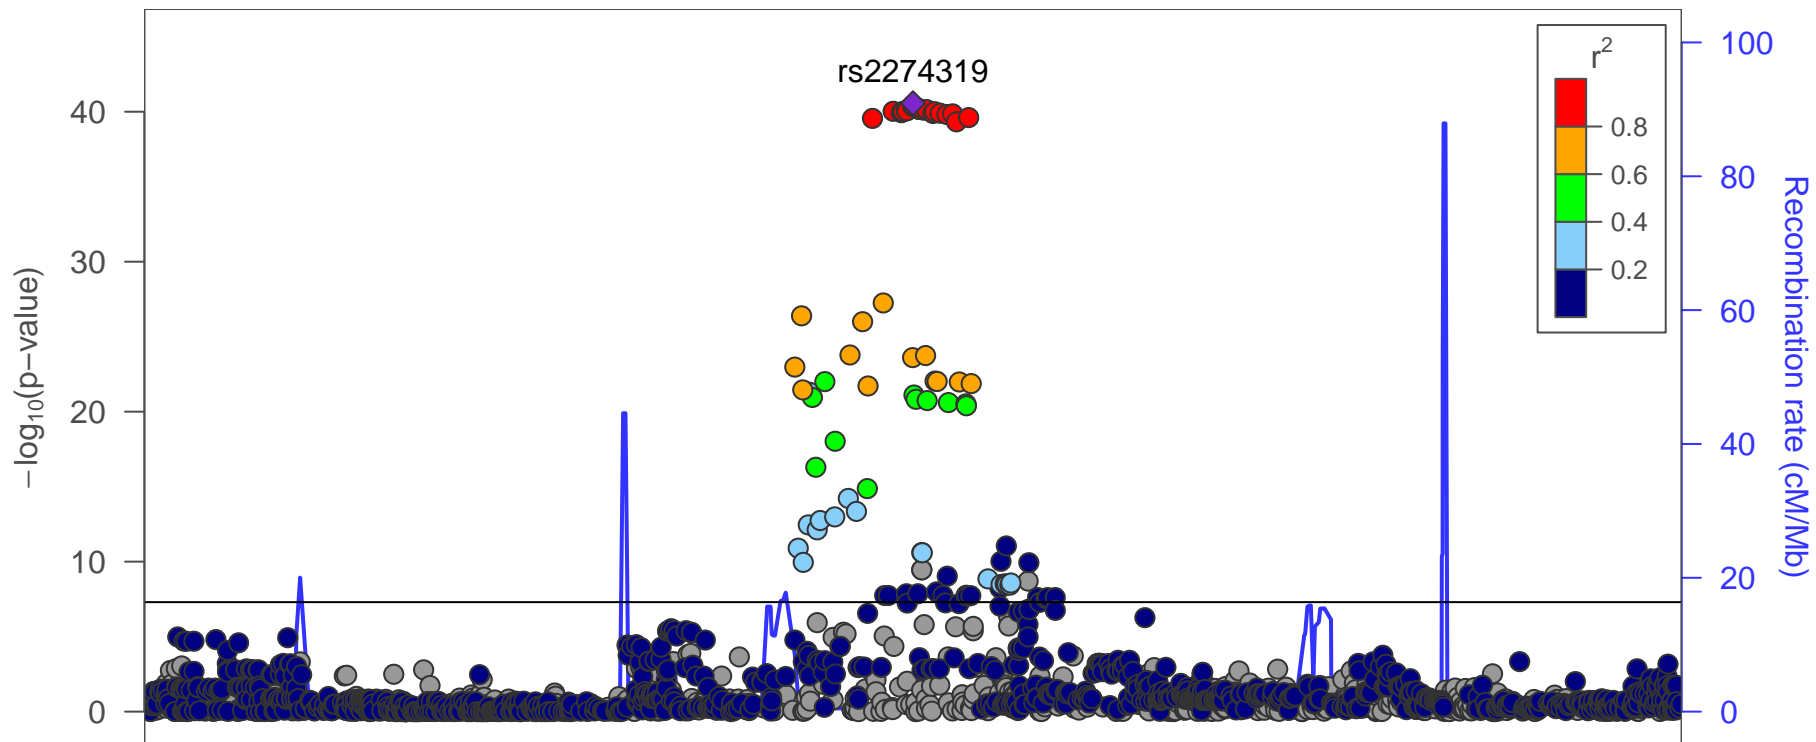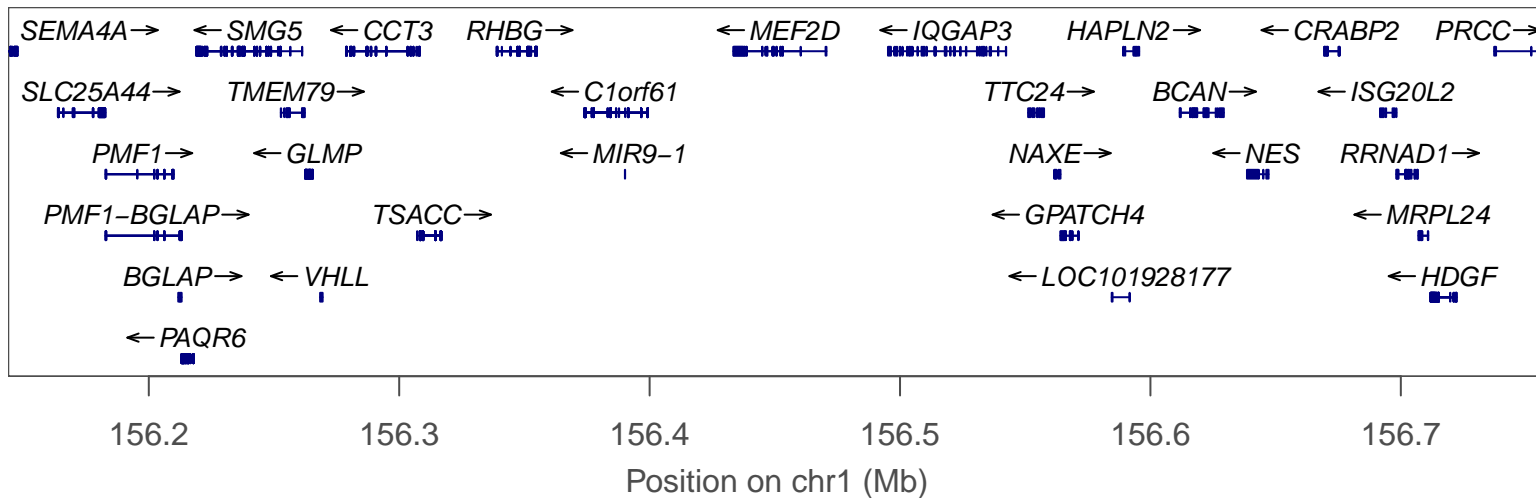

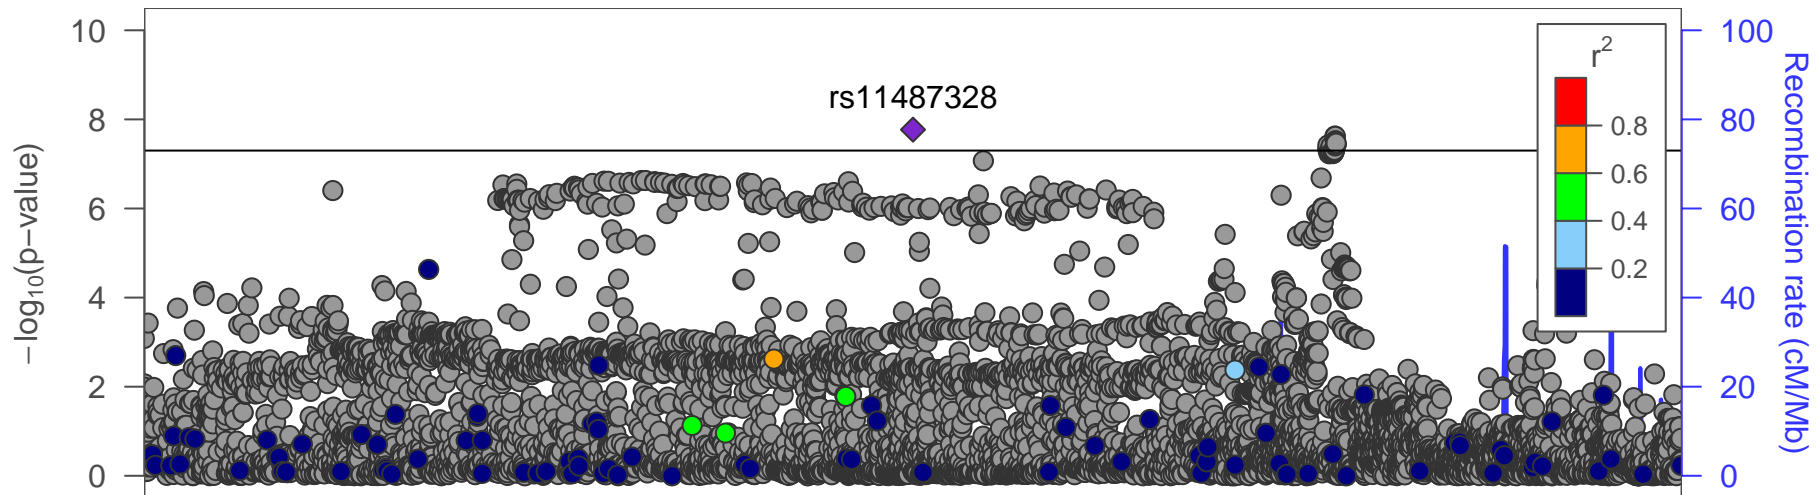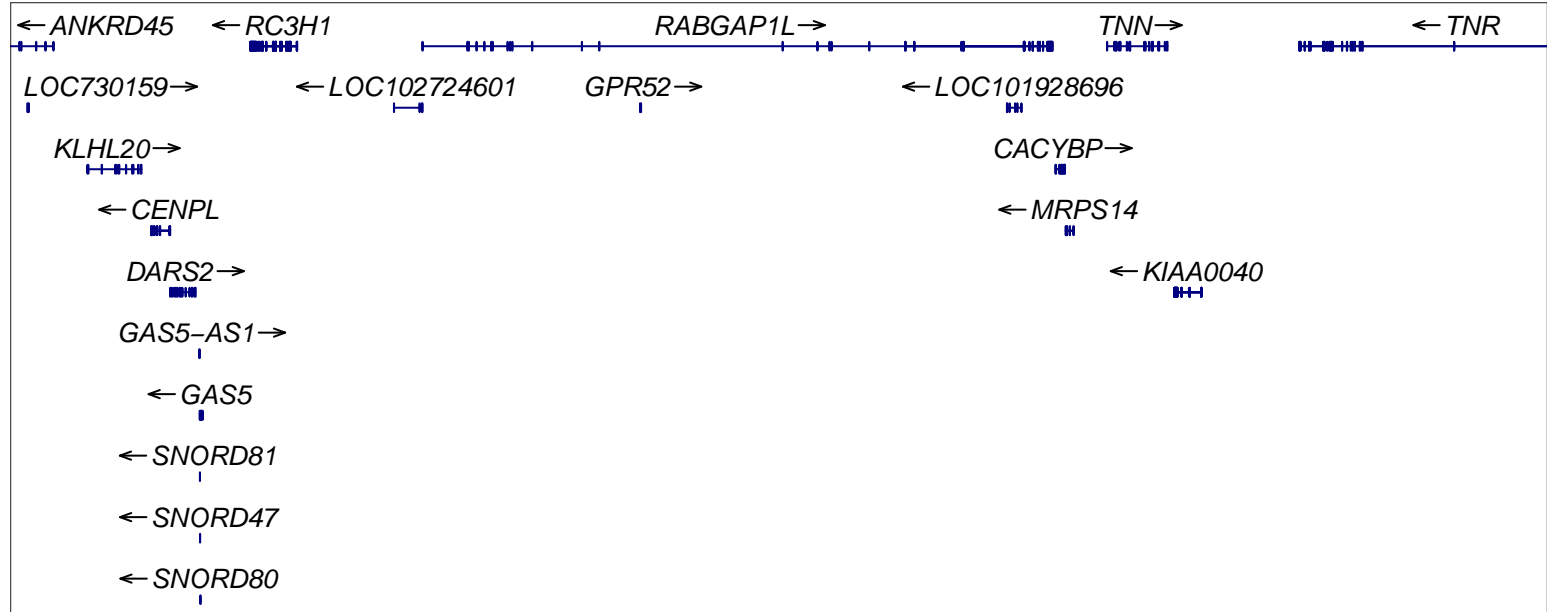

10 genes omitted

174

174.5

175

175.5

Position on chr1 (Mb)

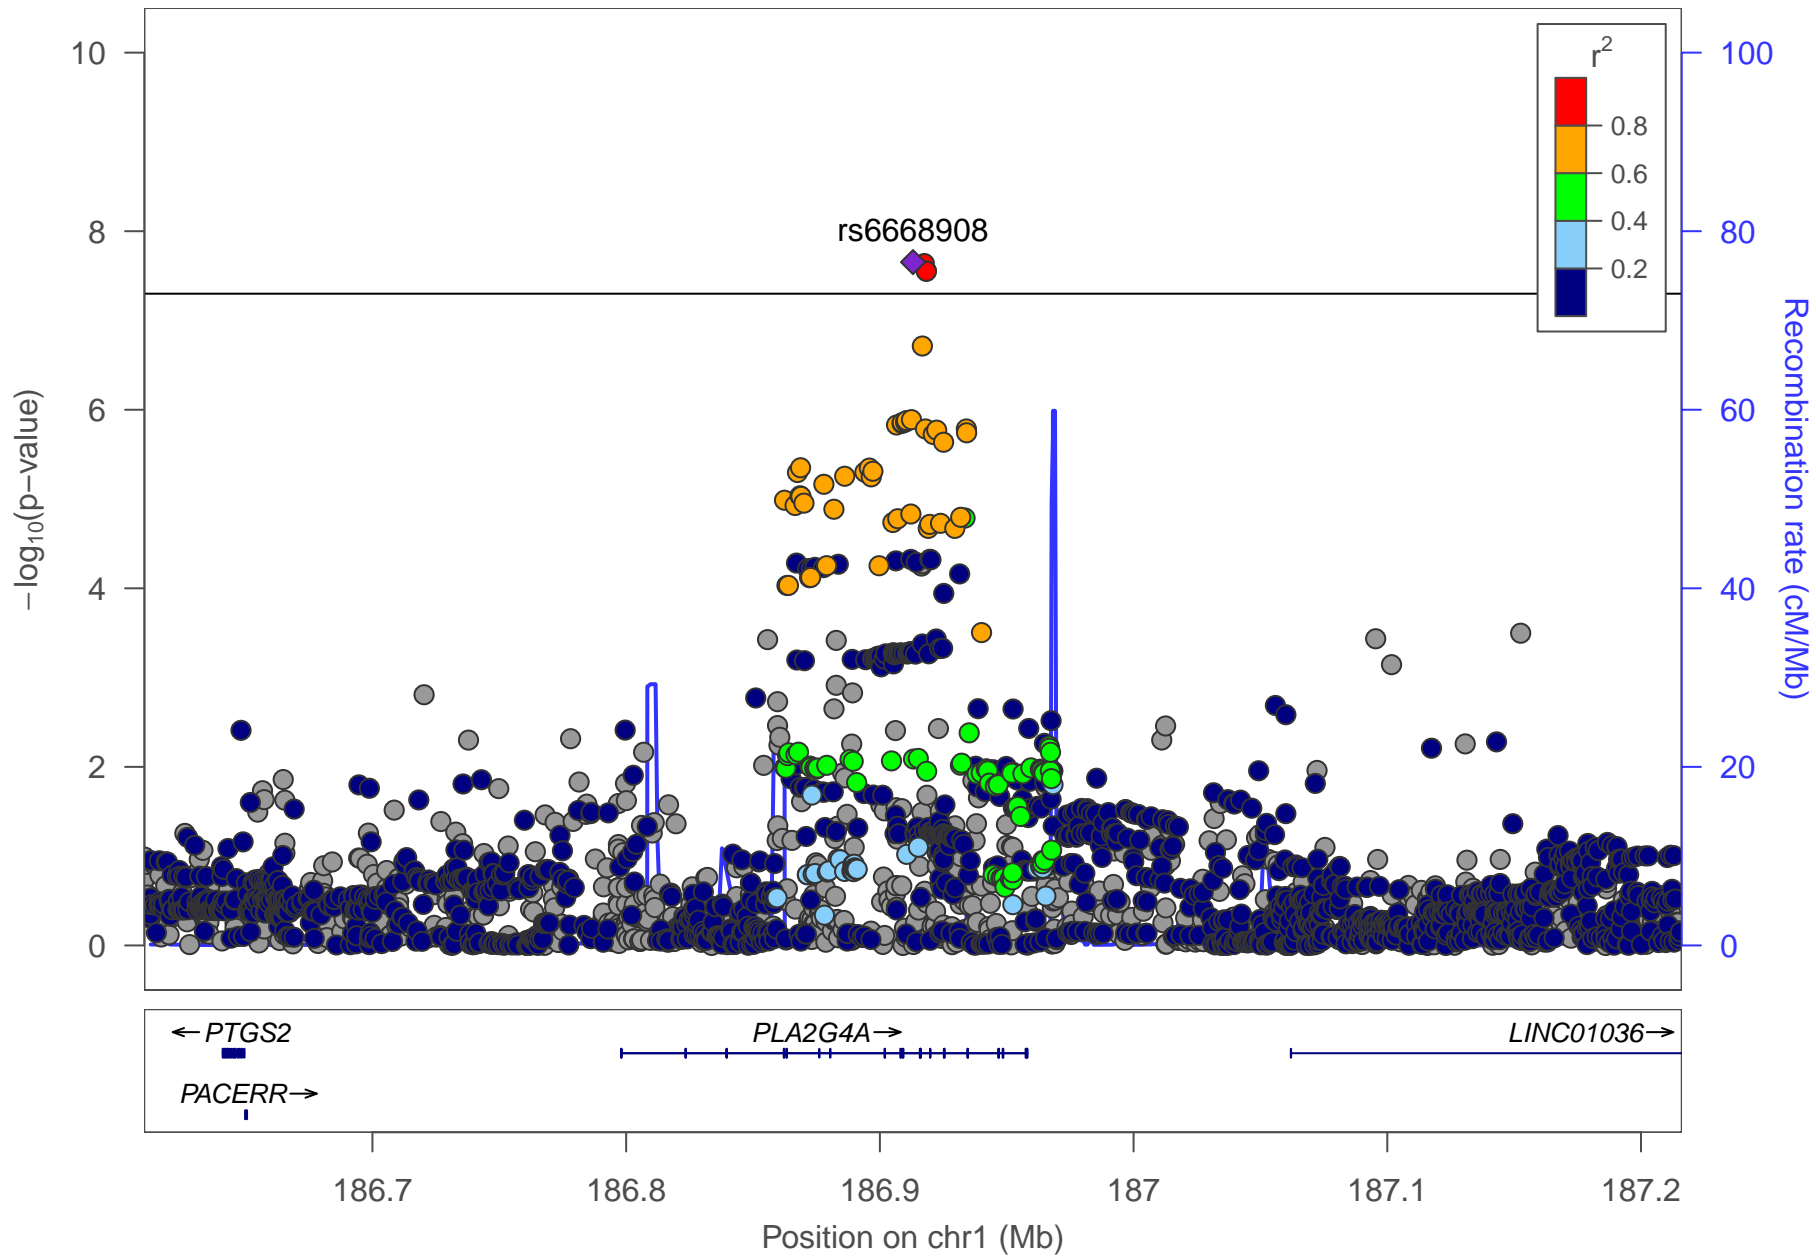

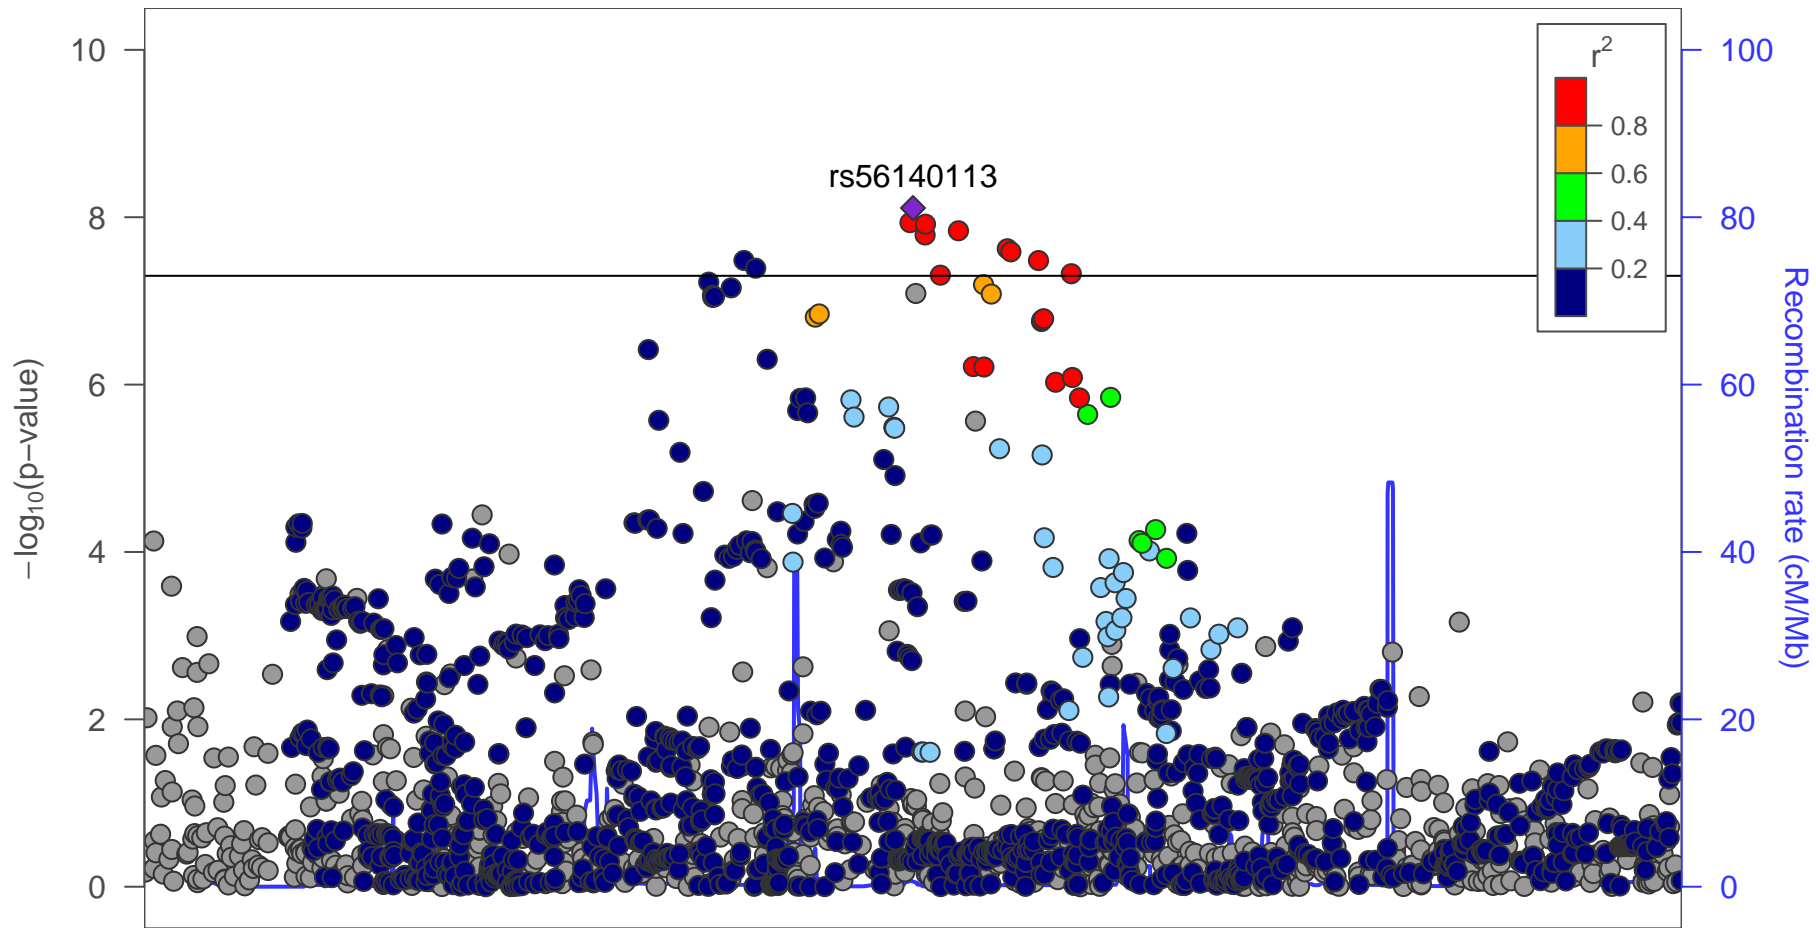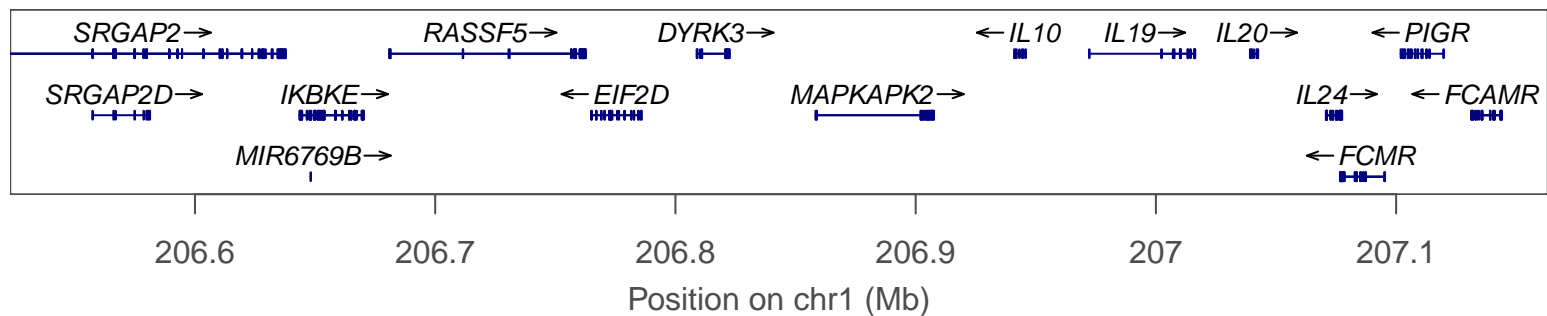

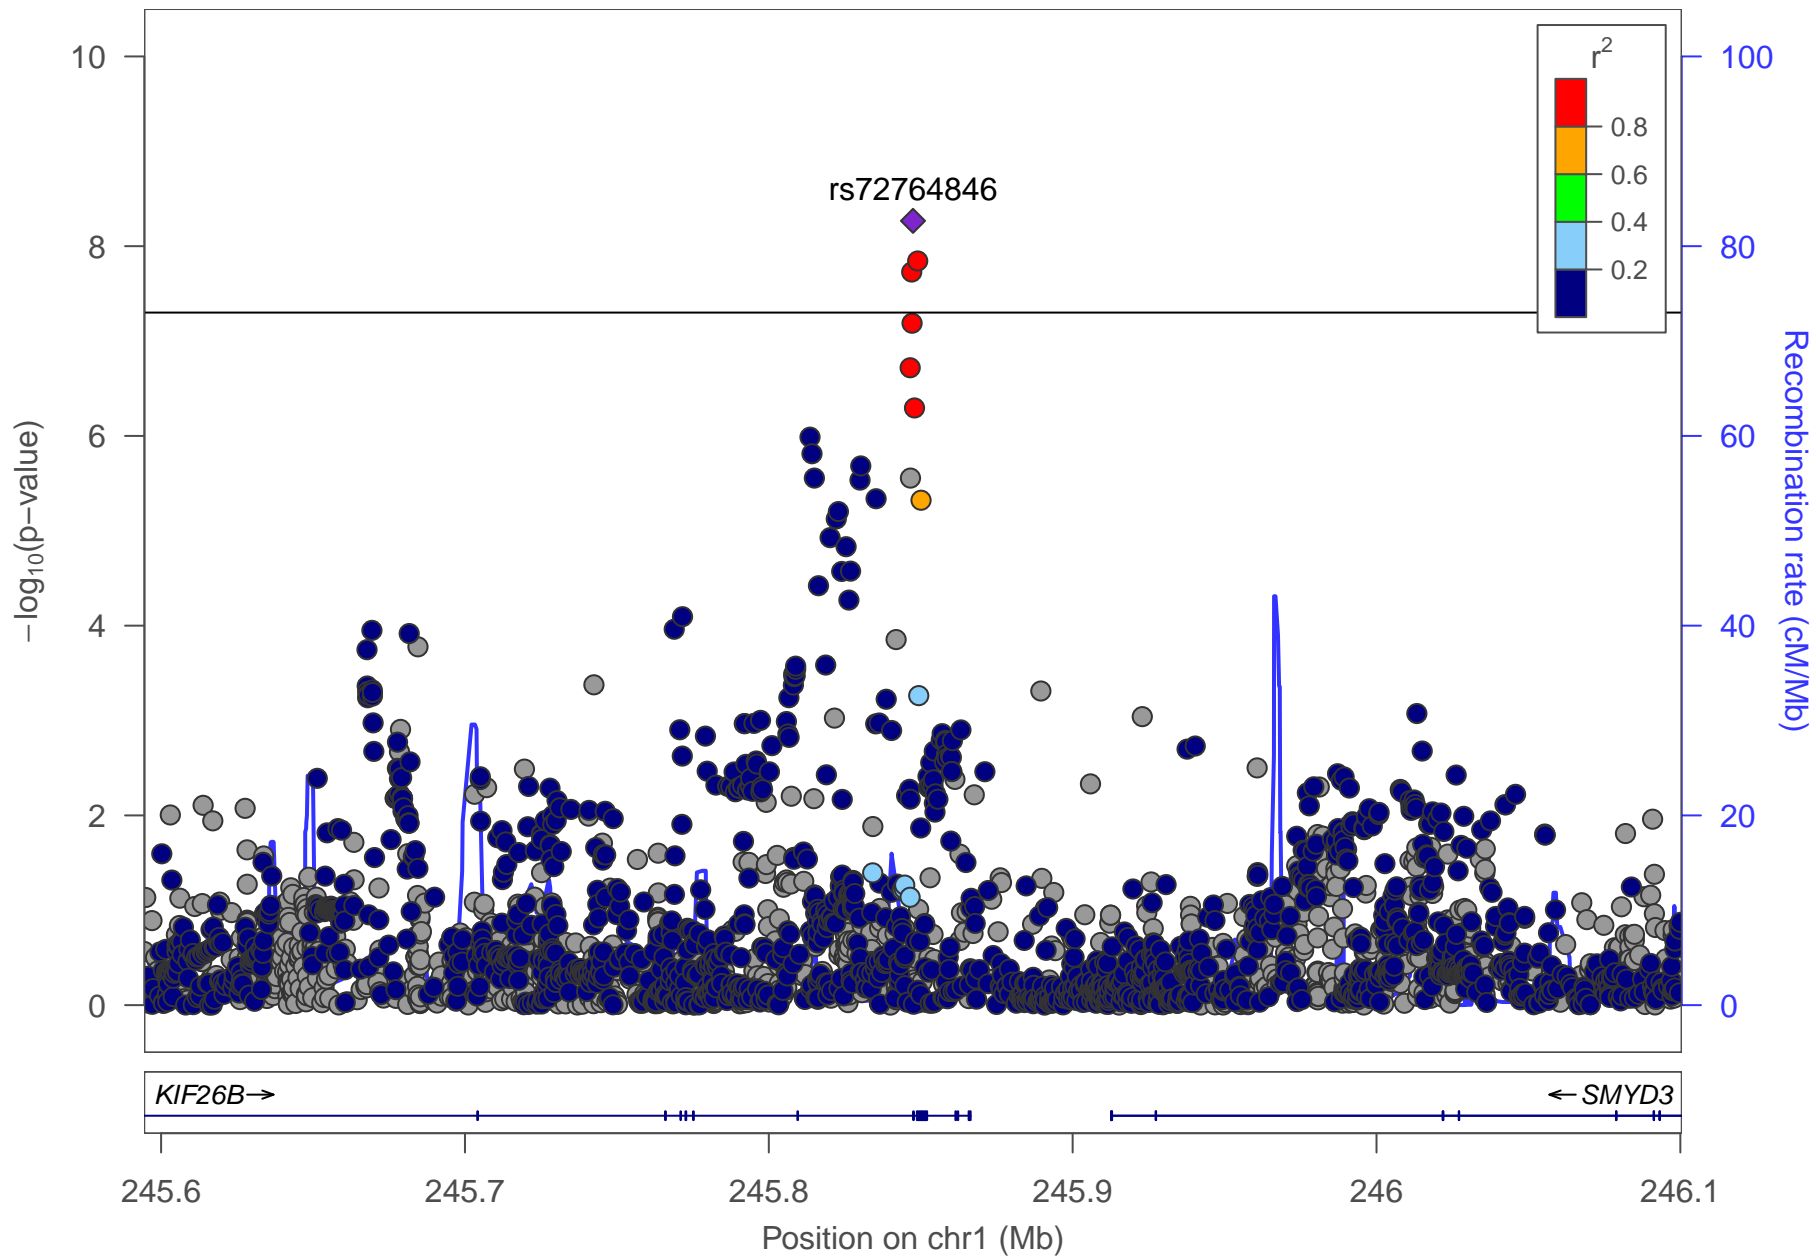



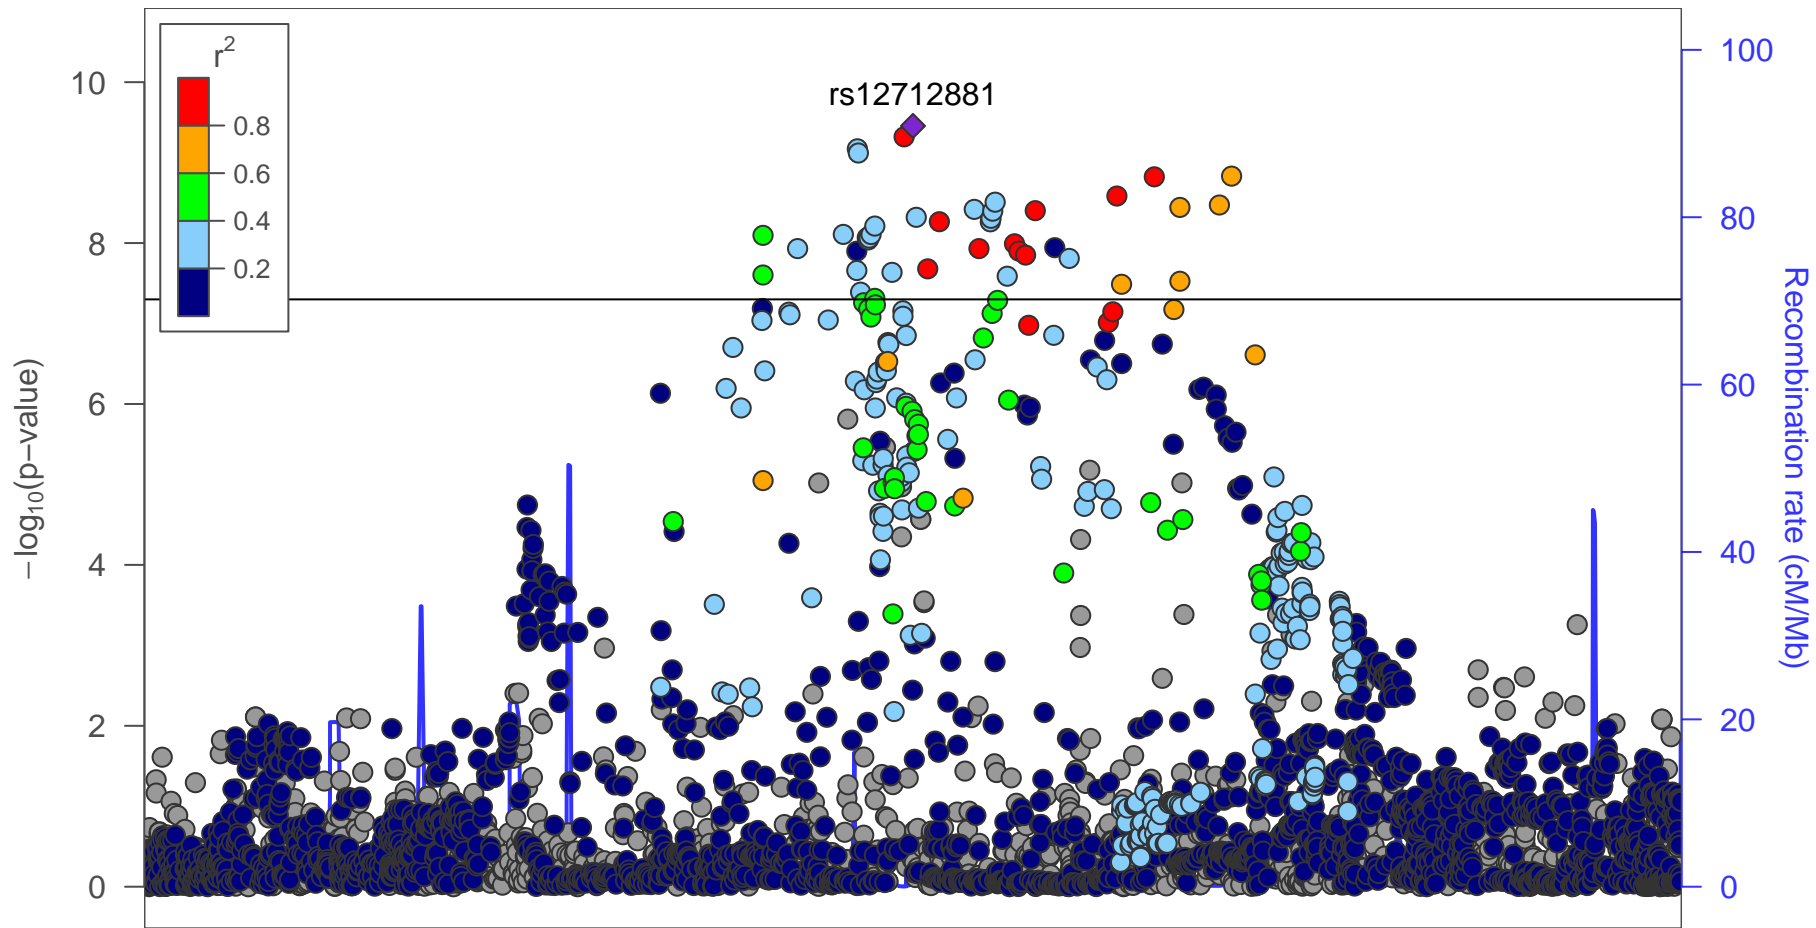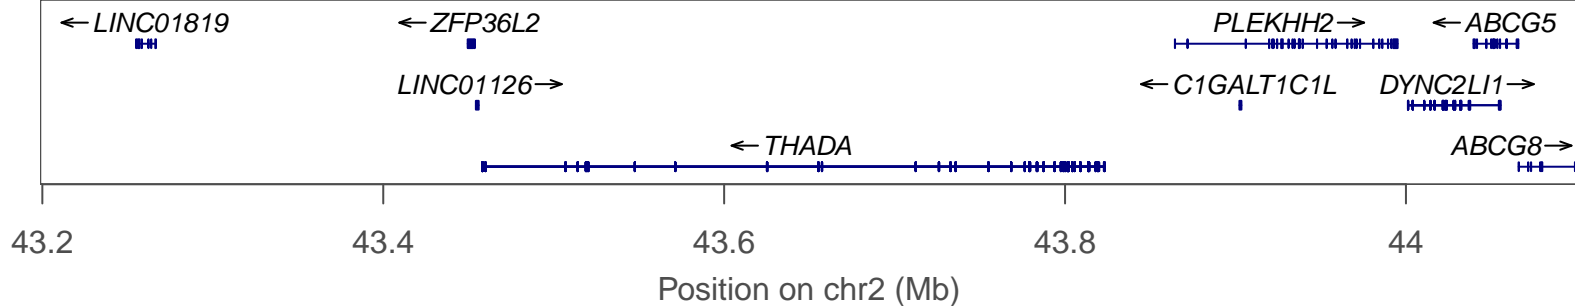

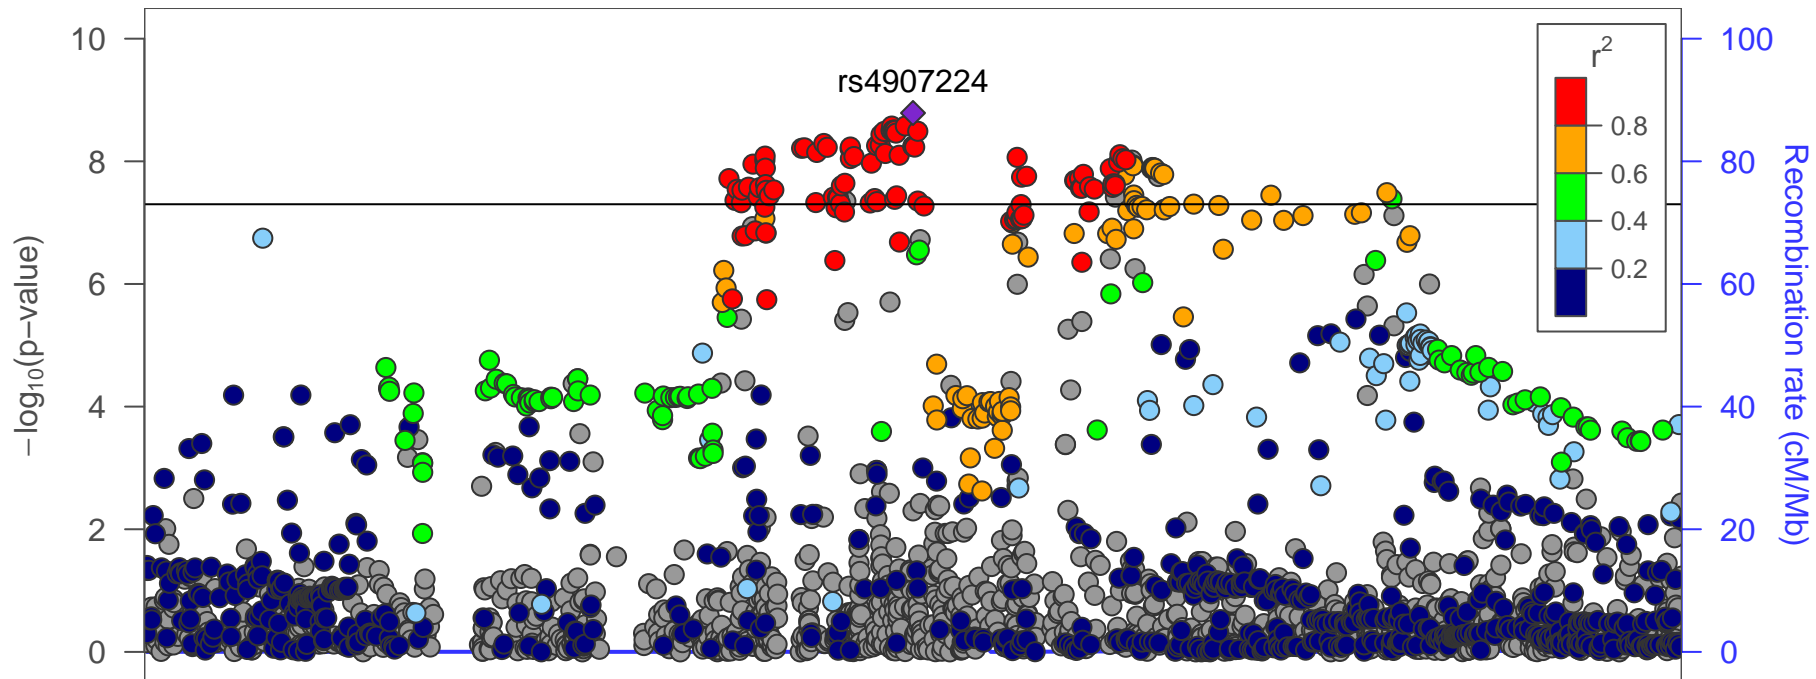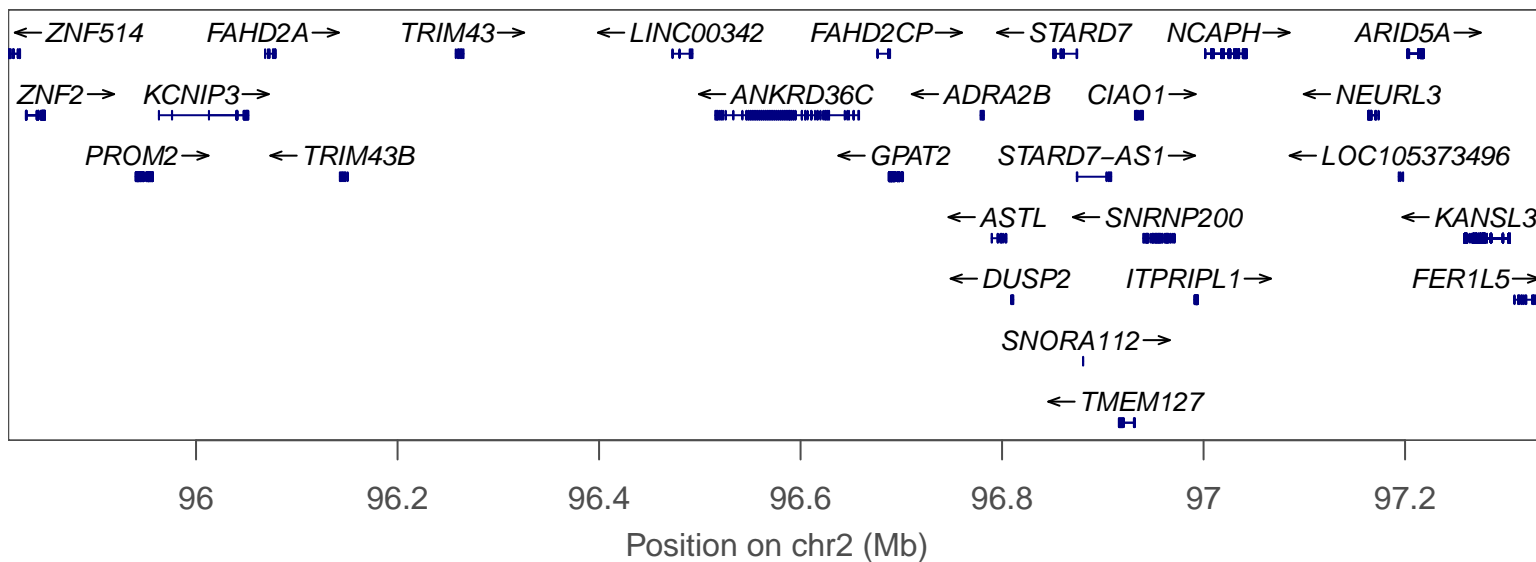

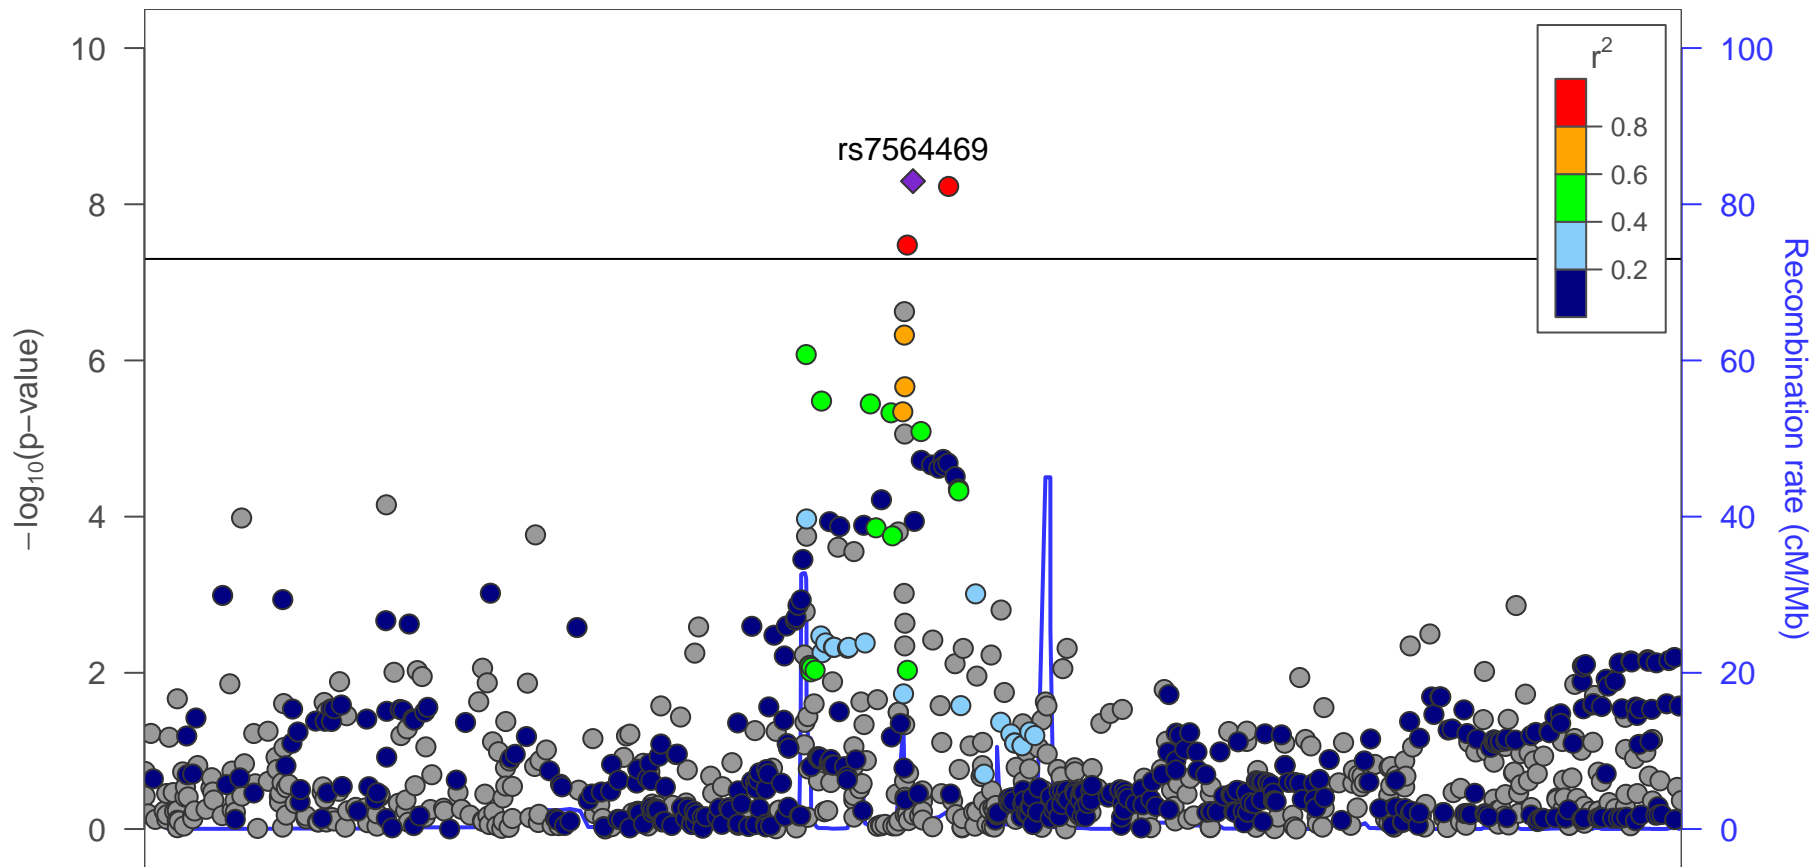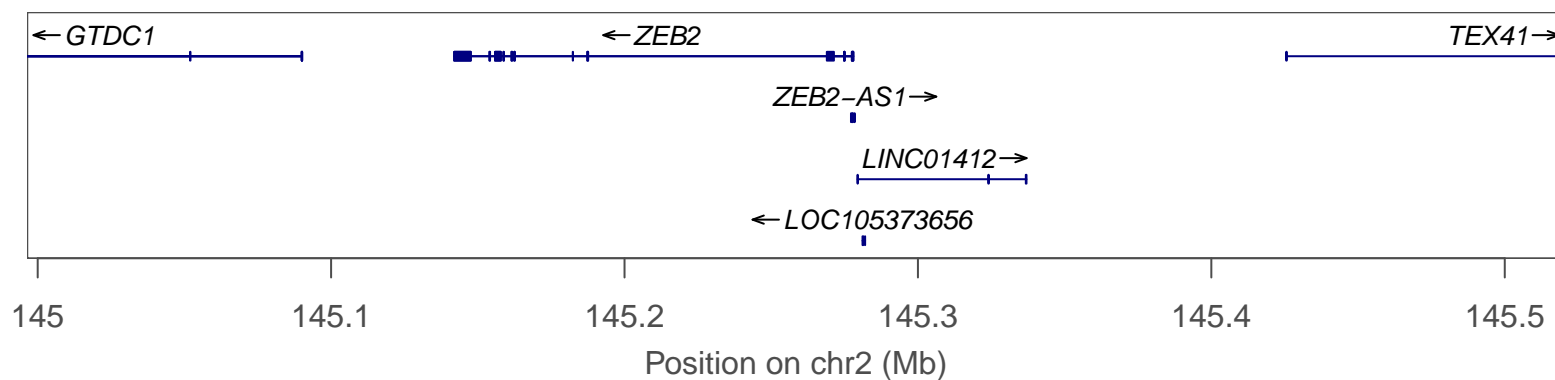

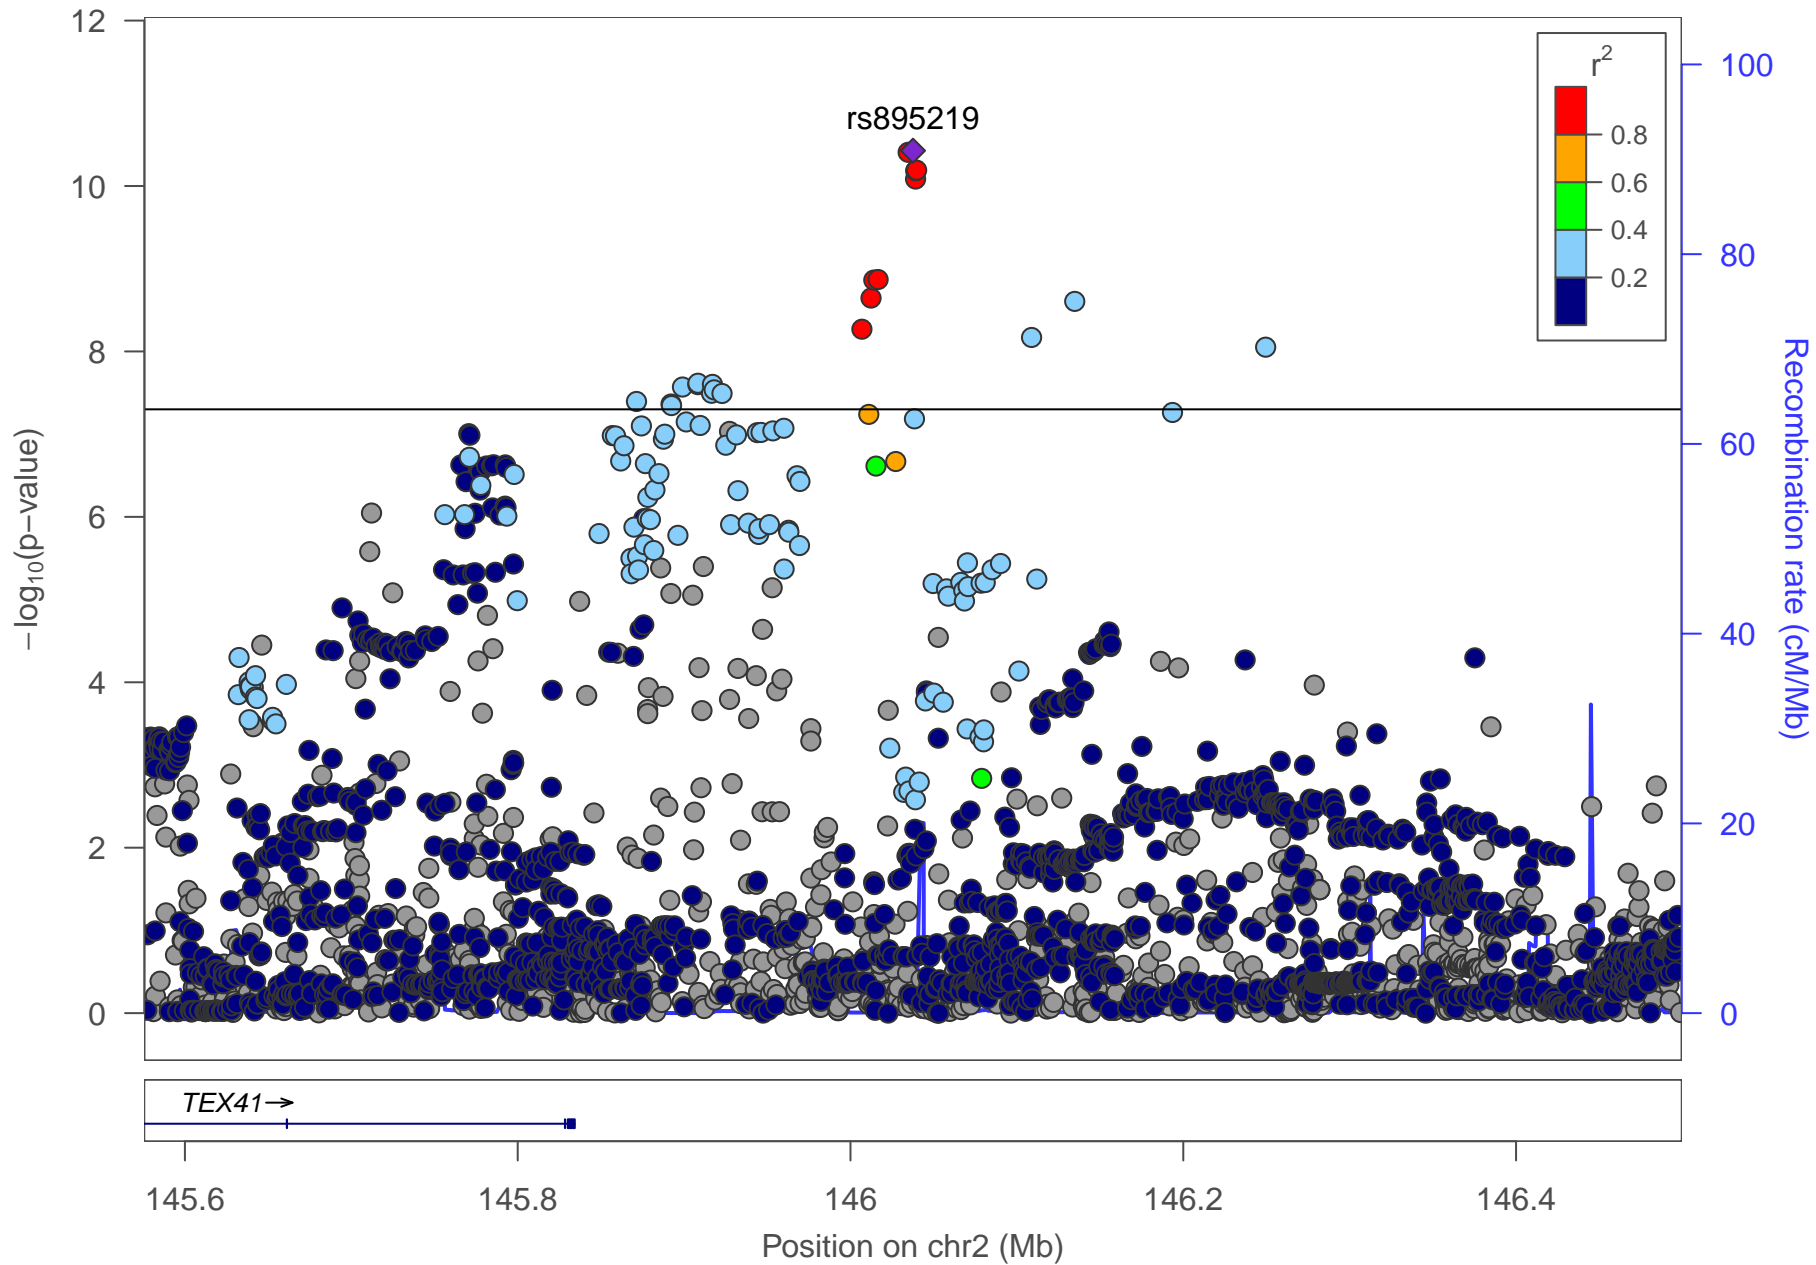

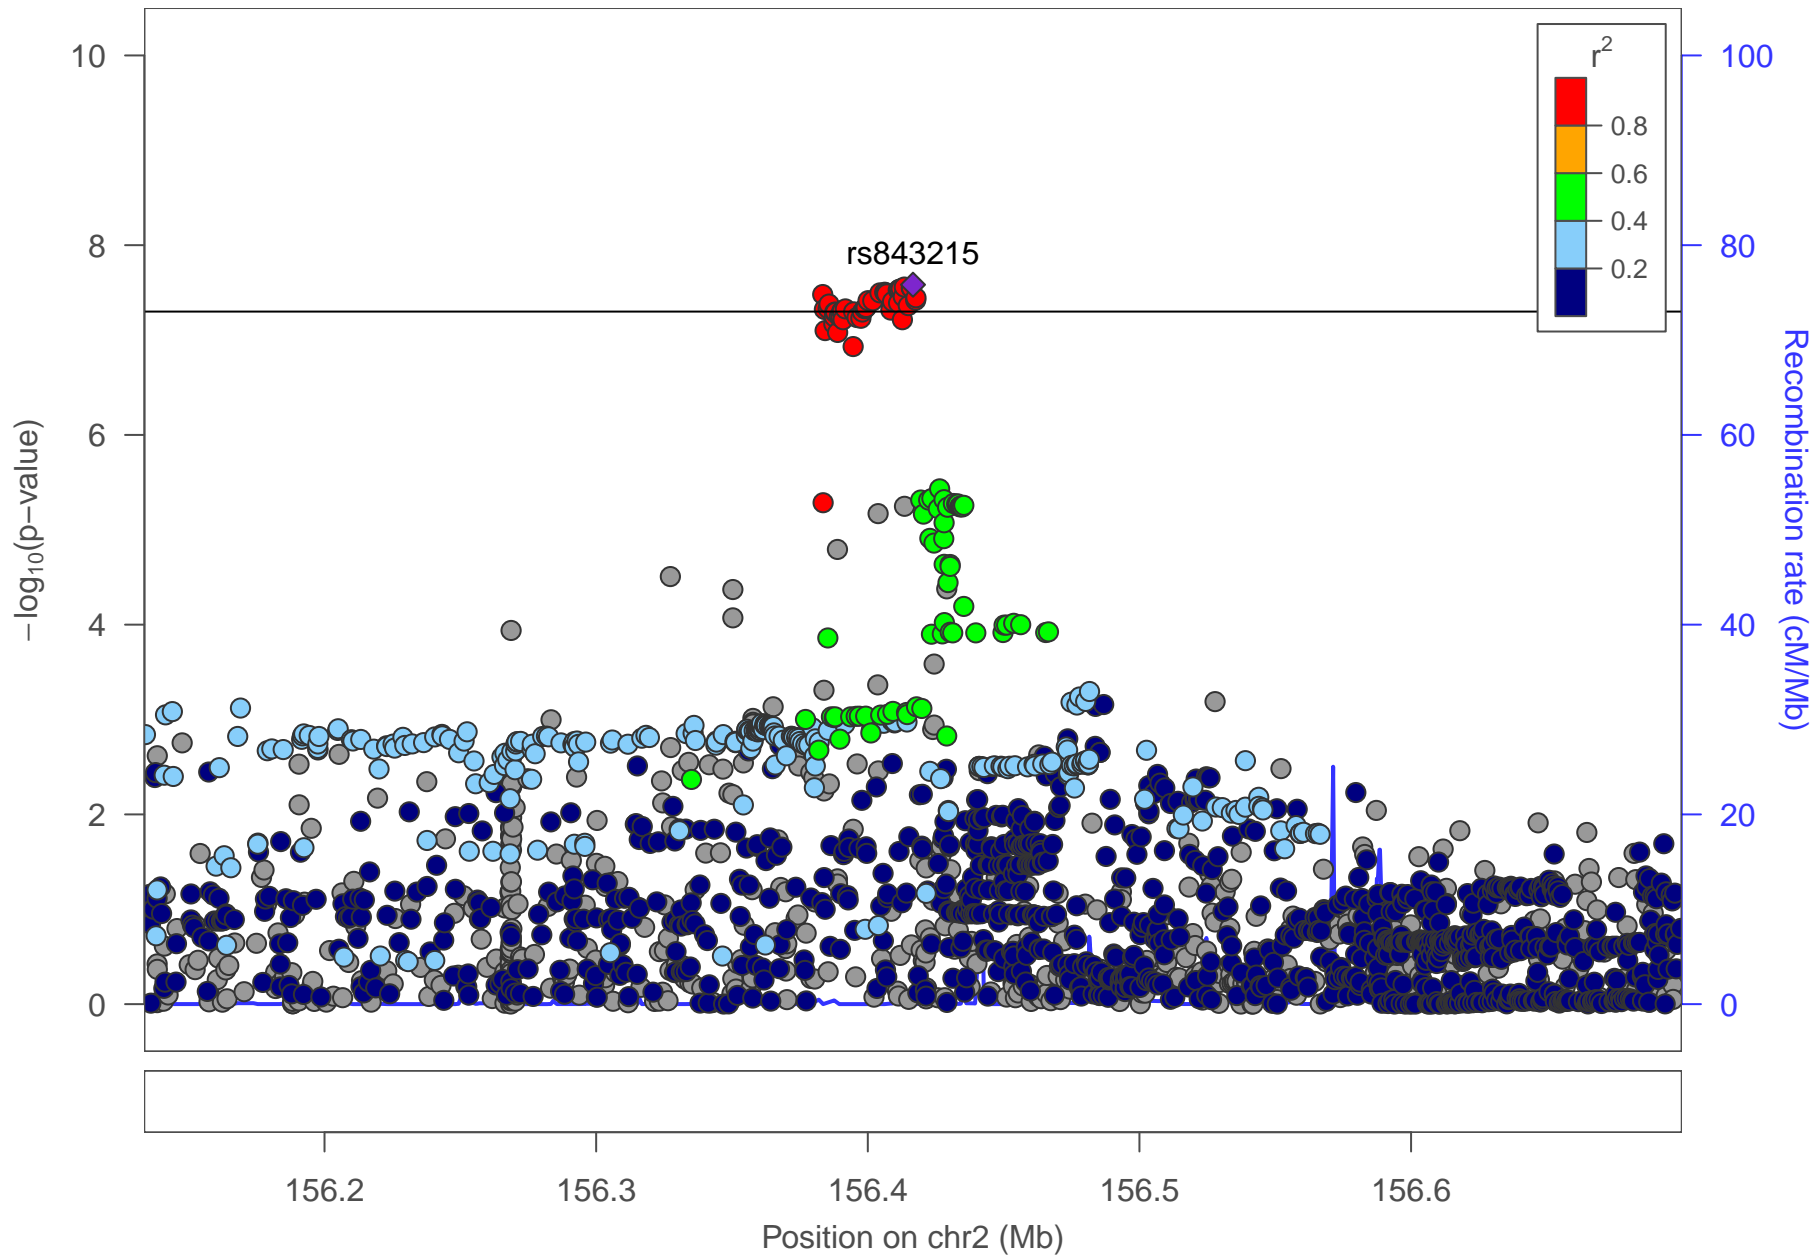

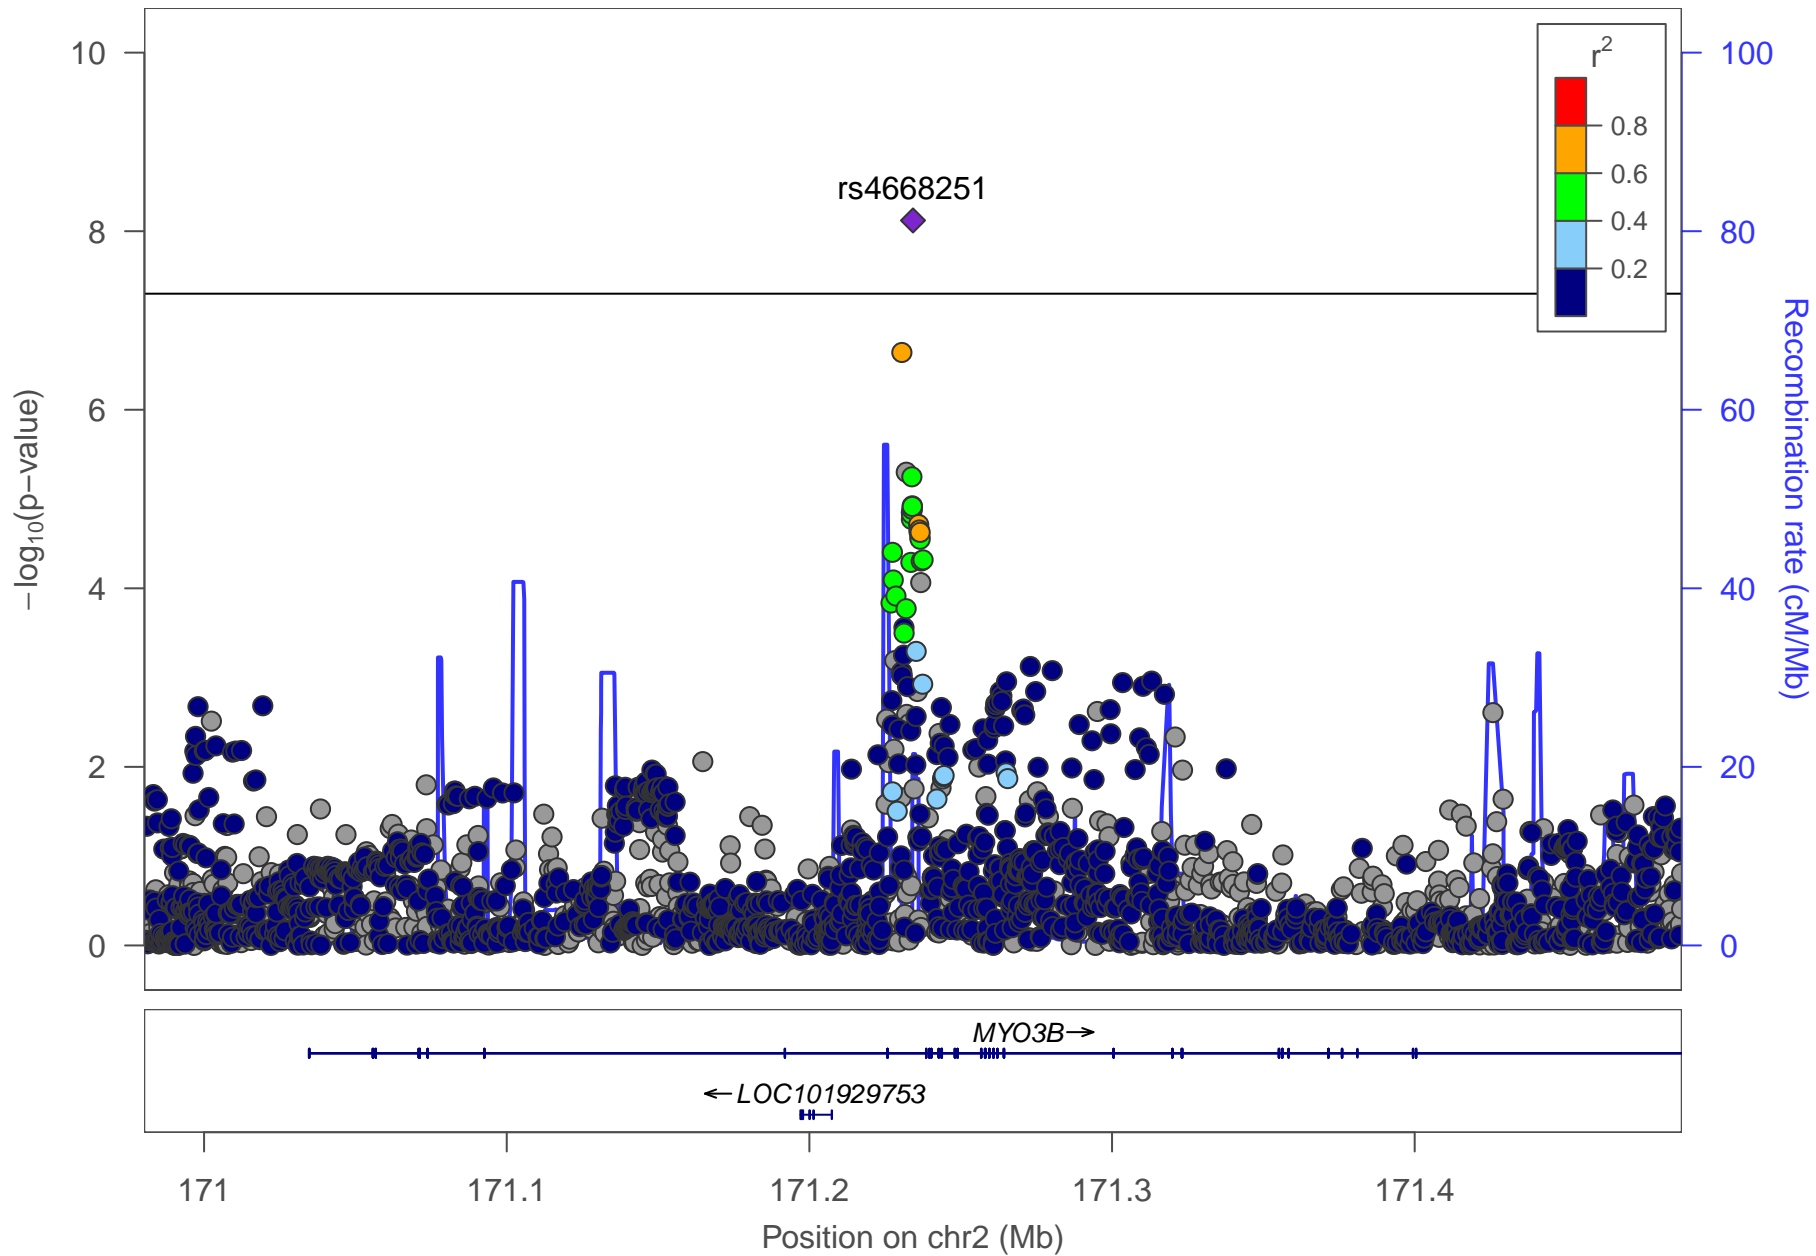

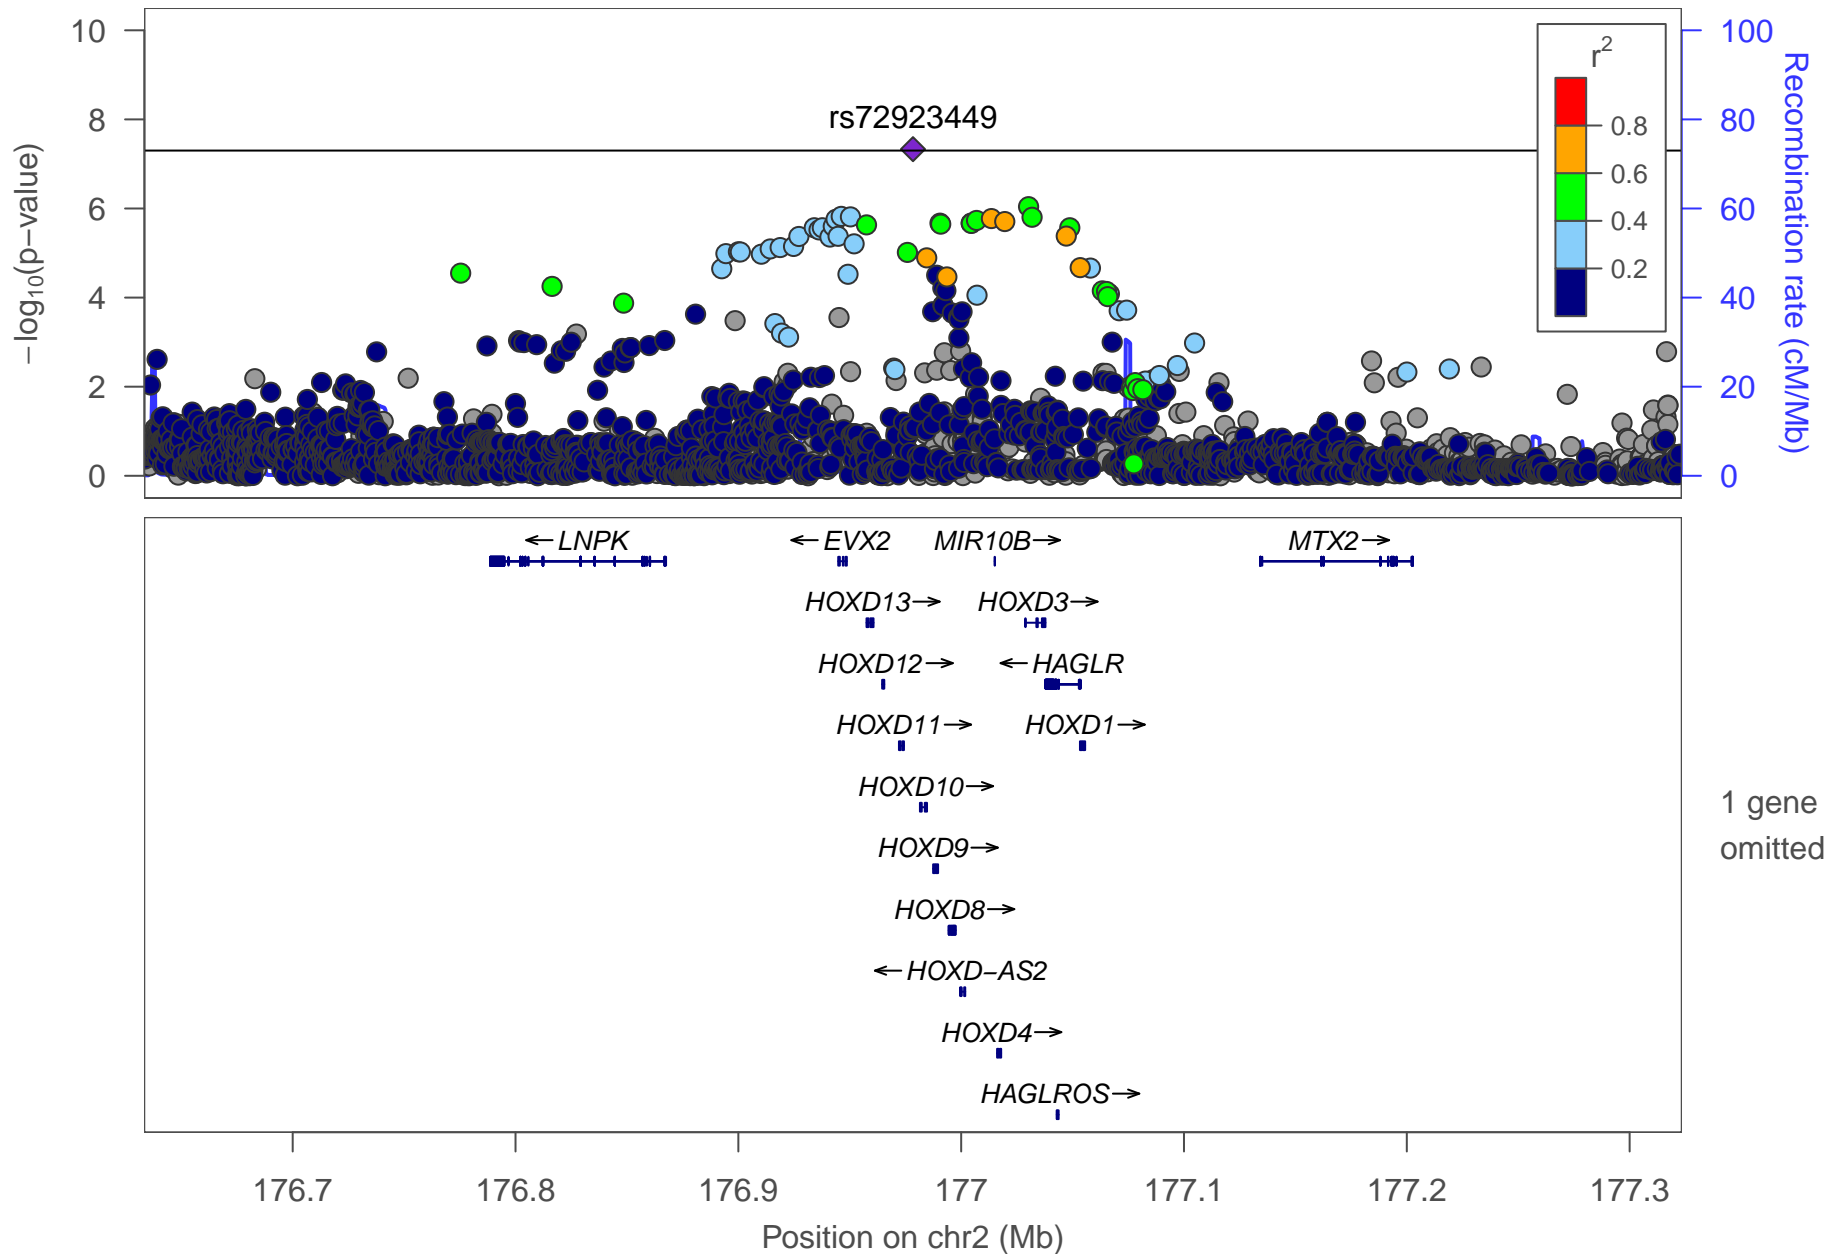

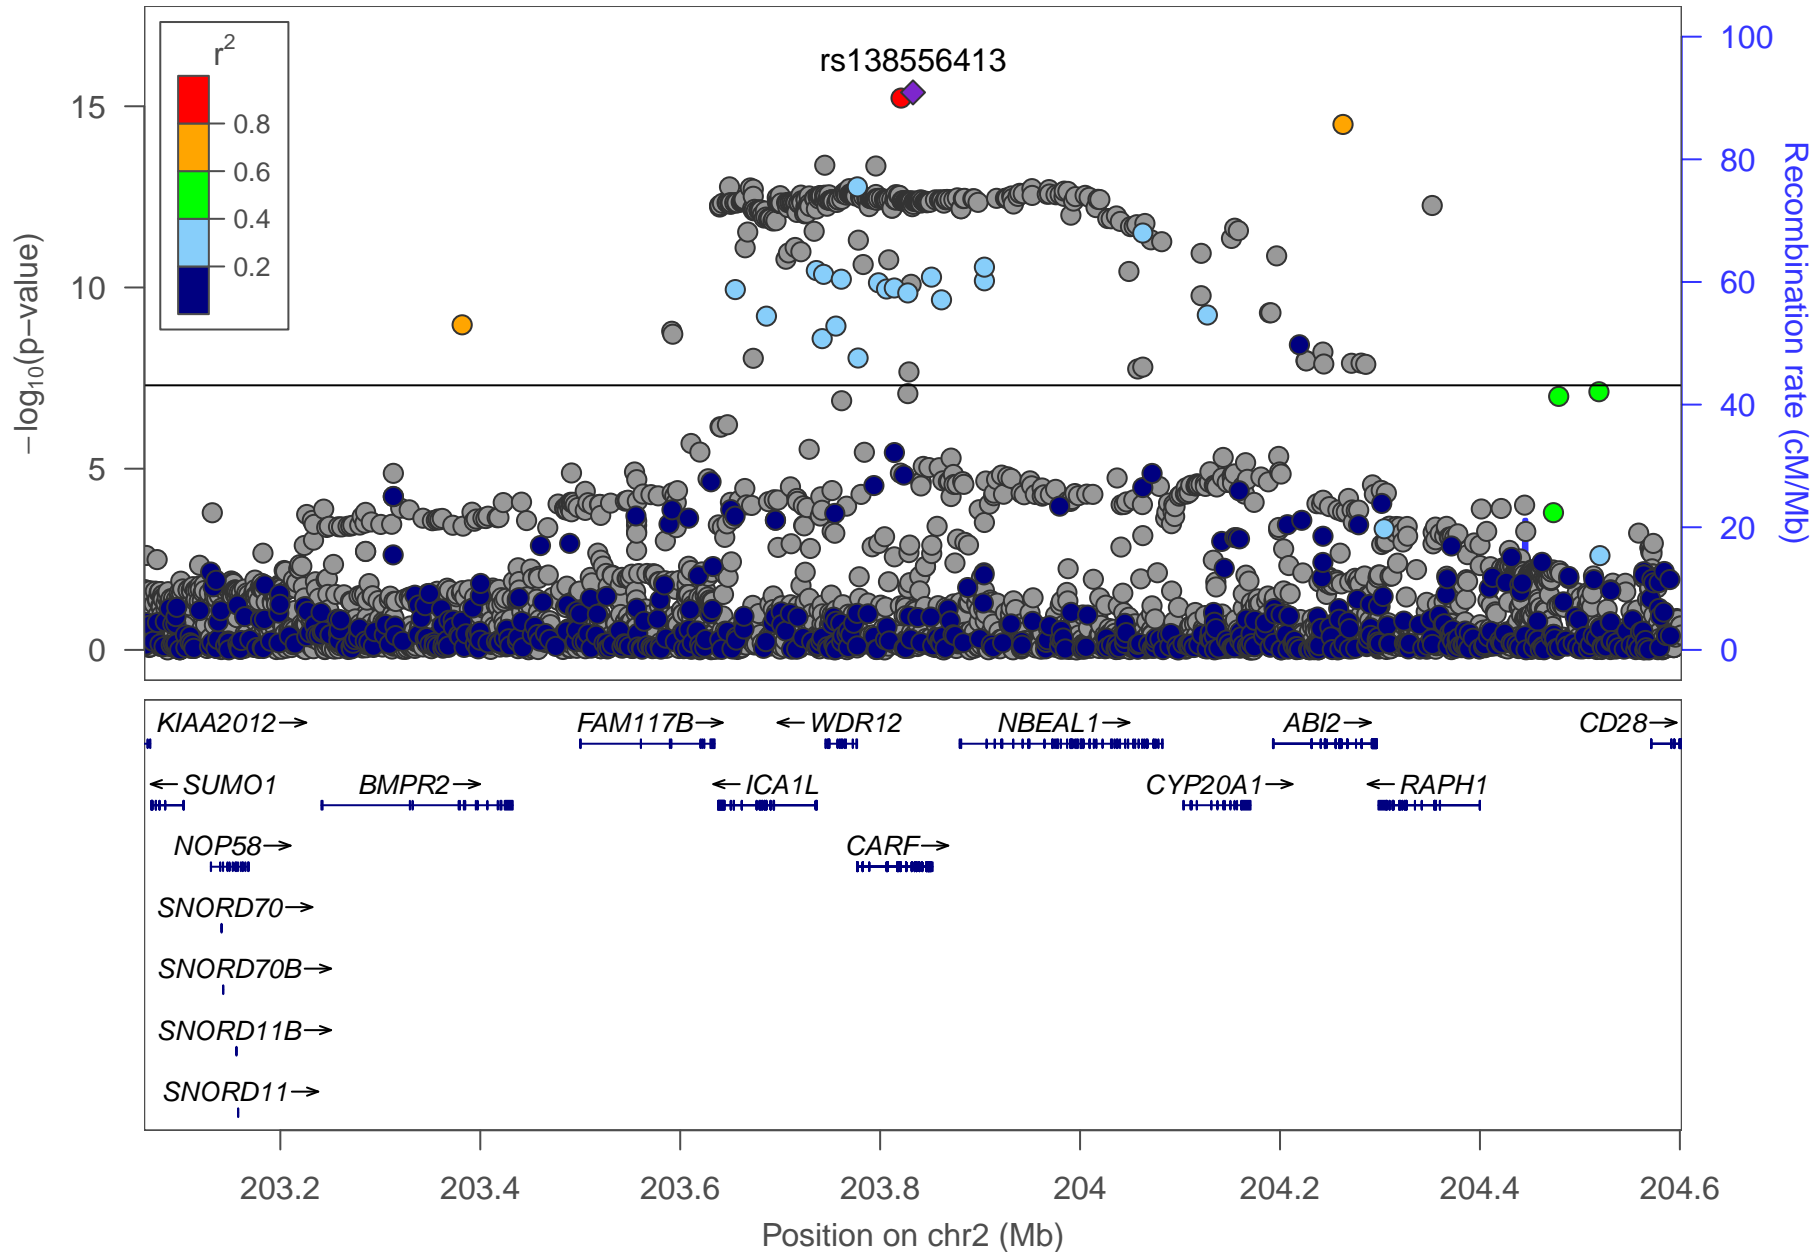



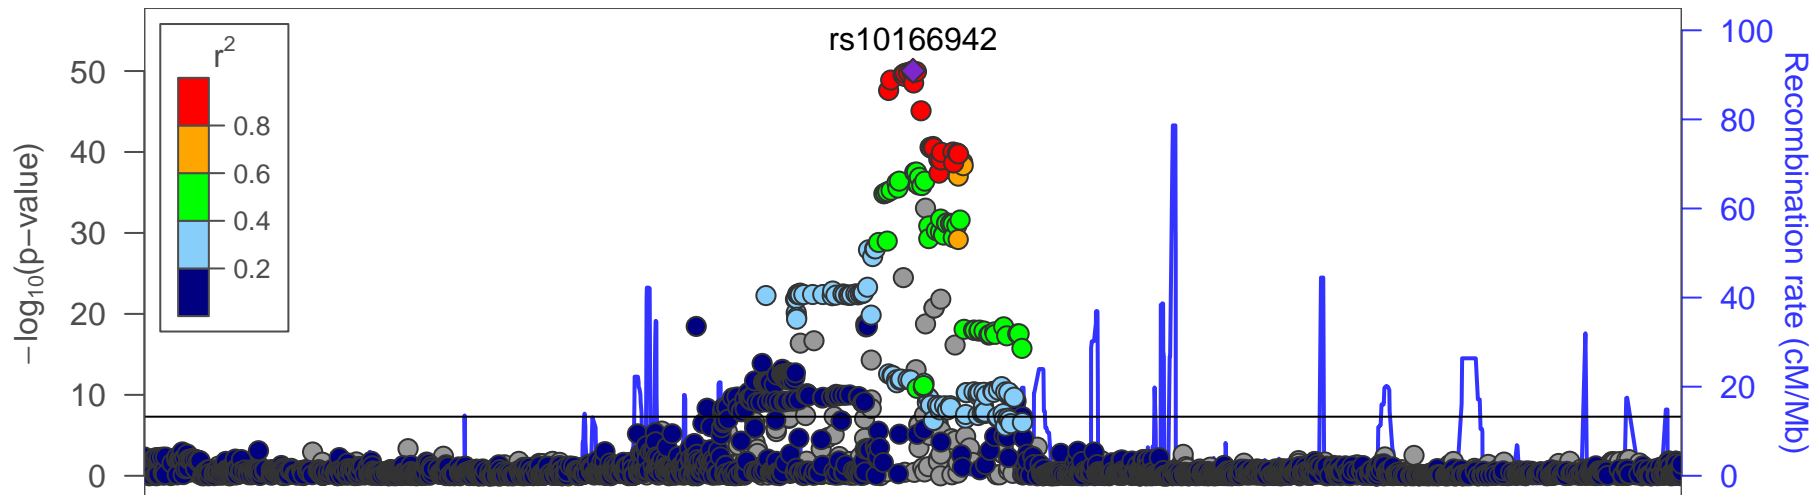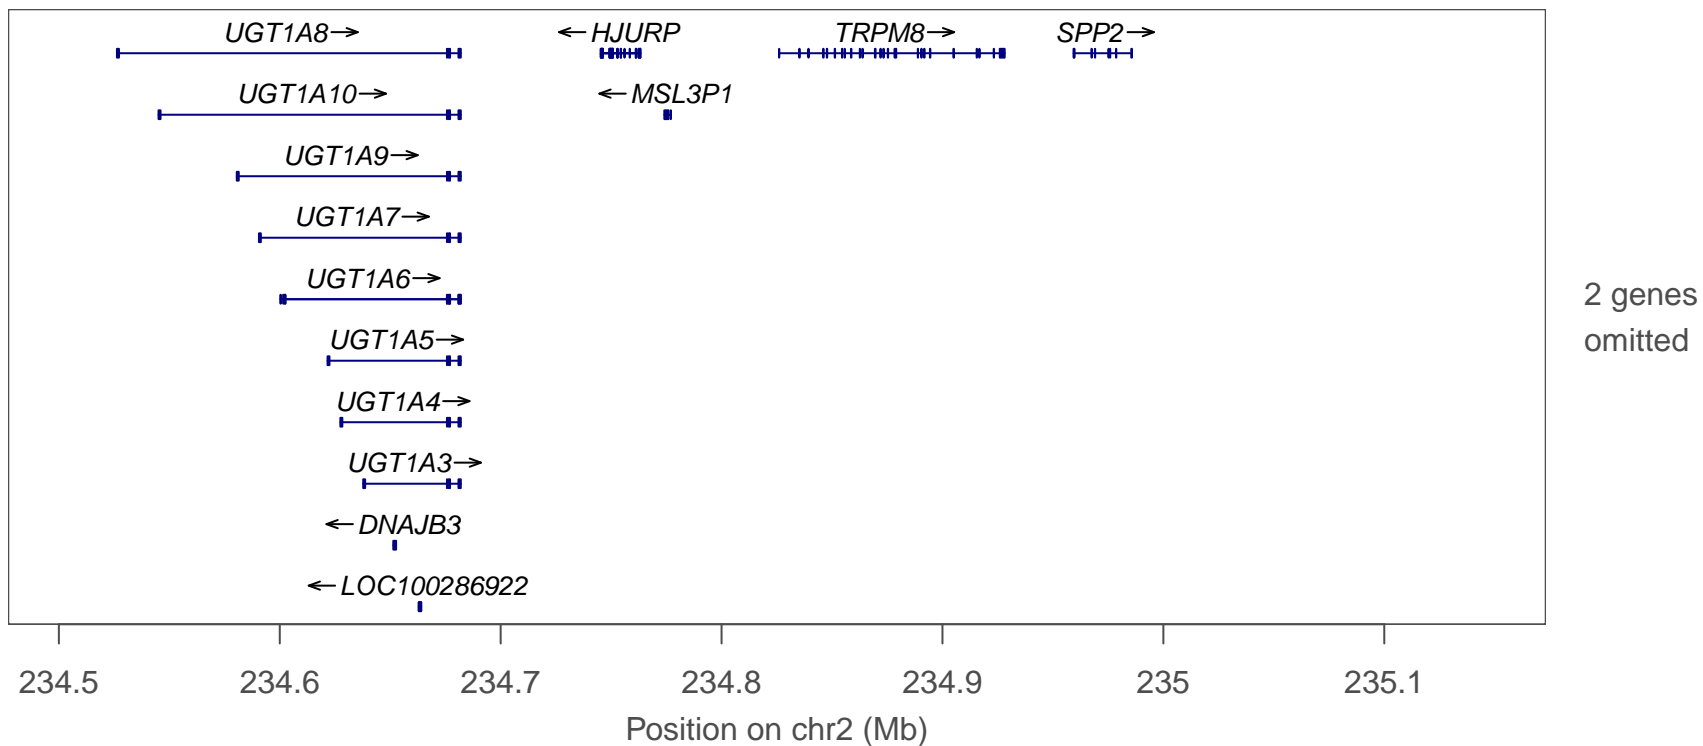

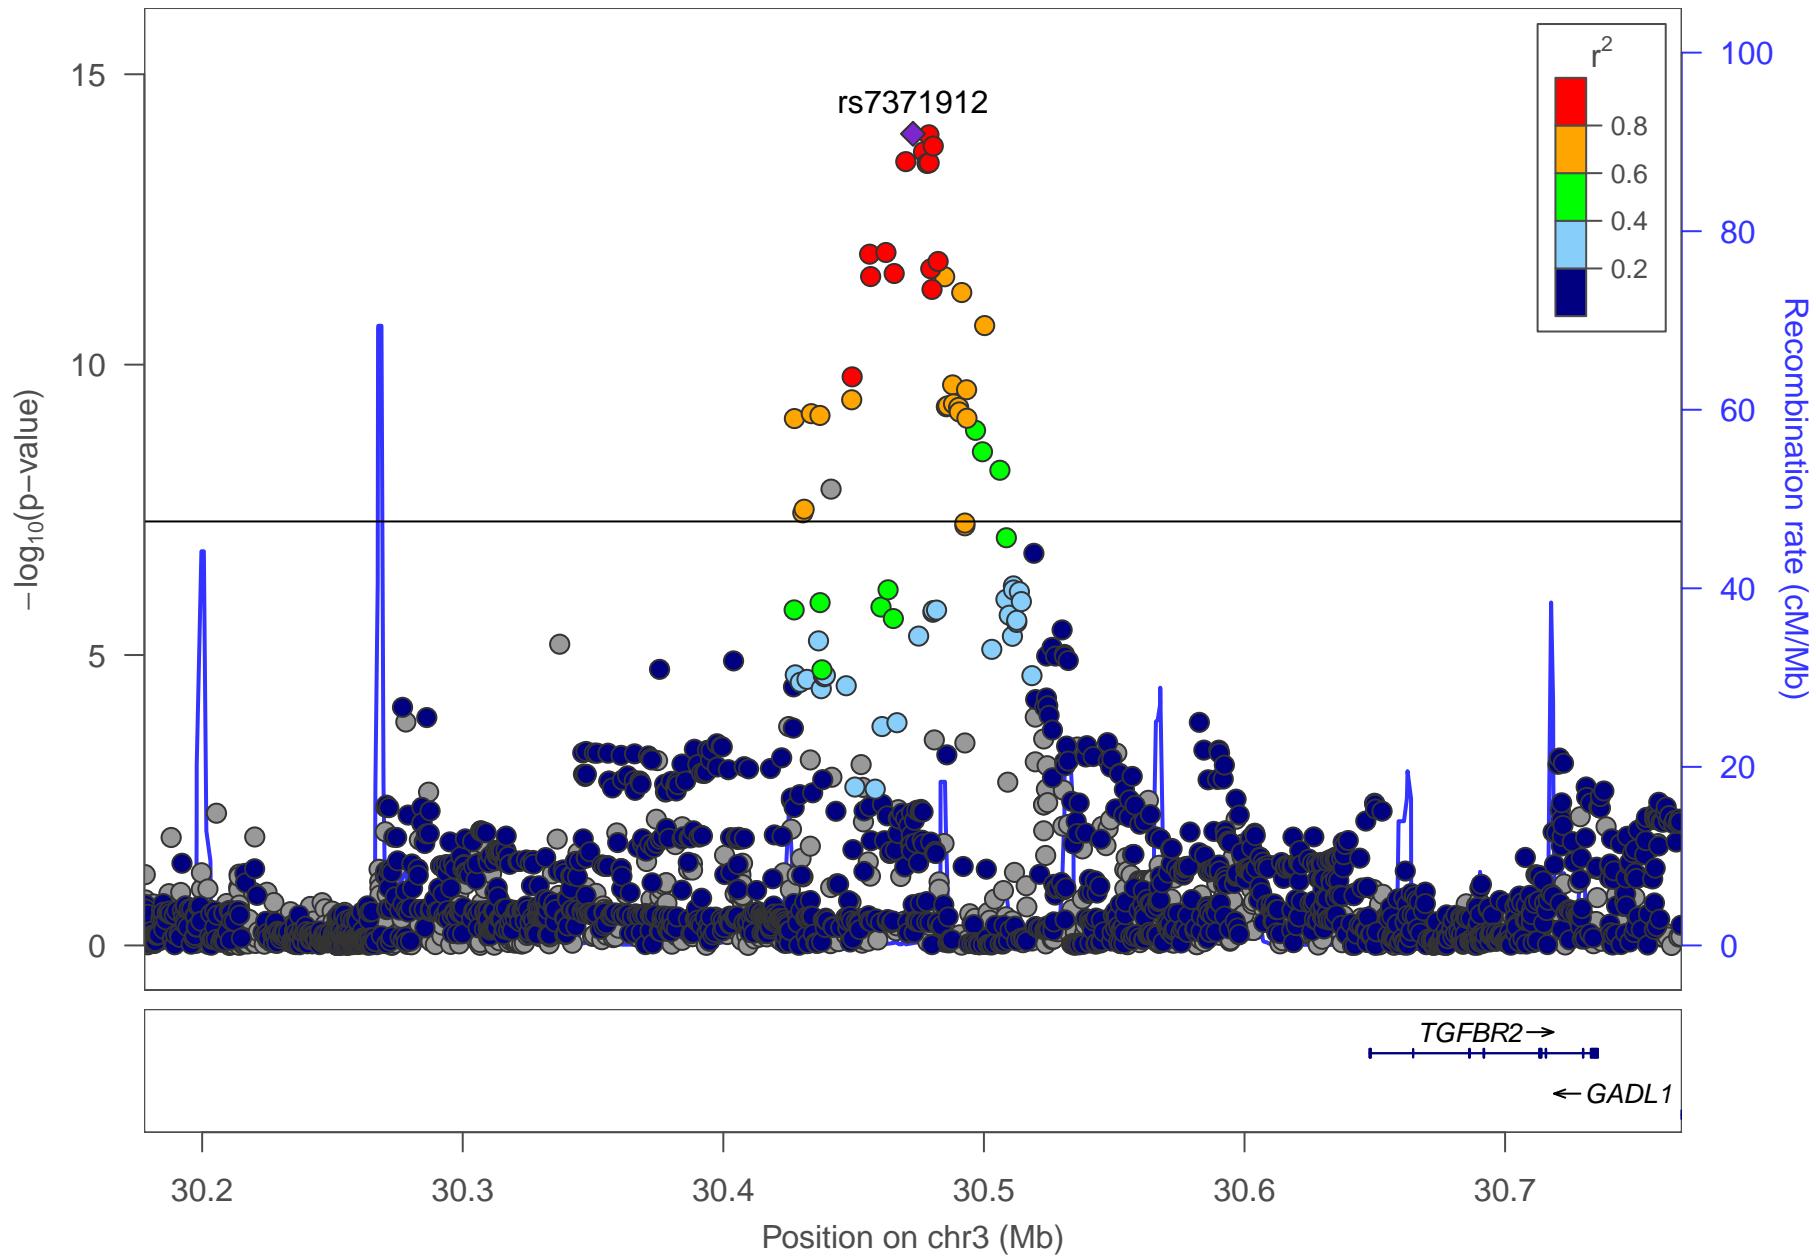

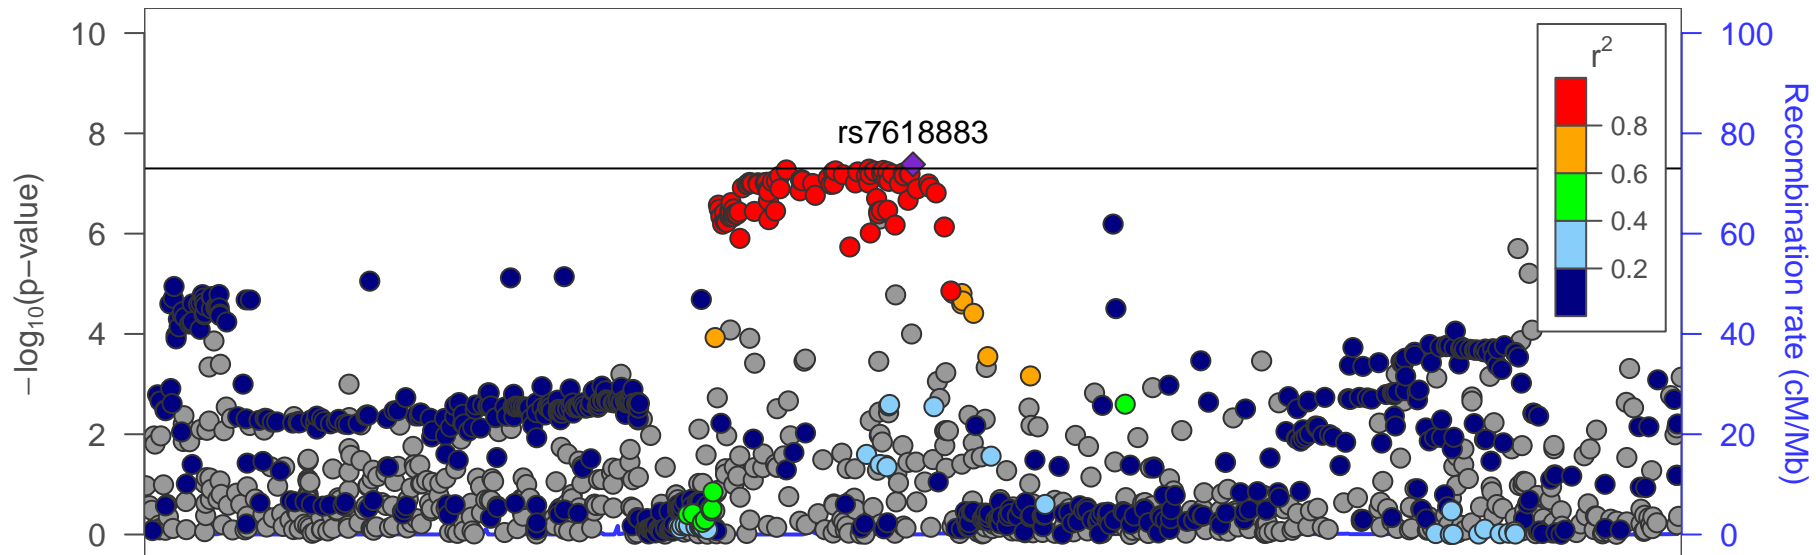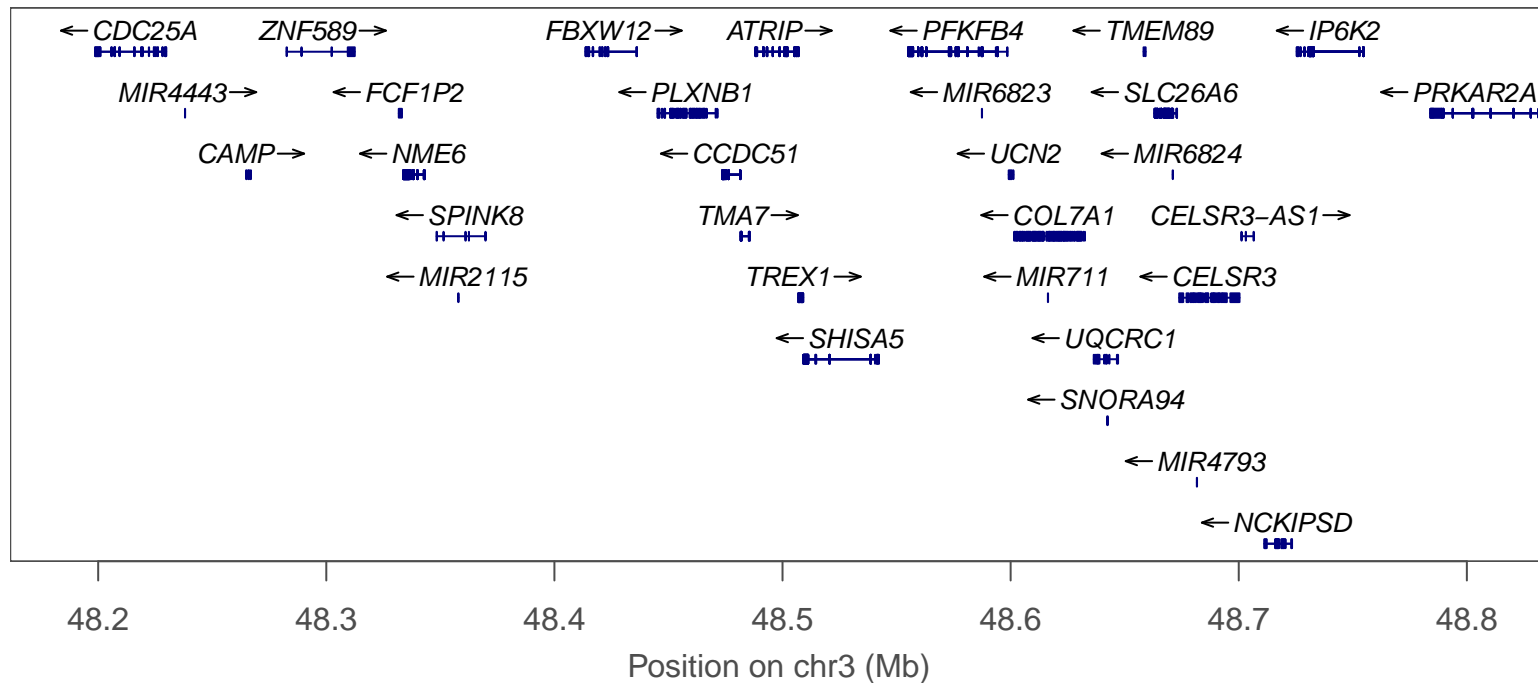

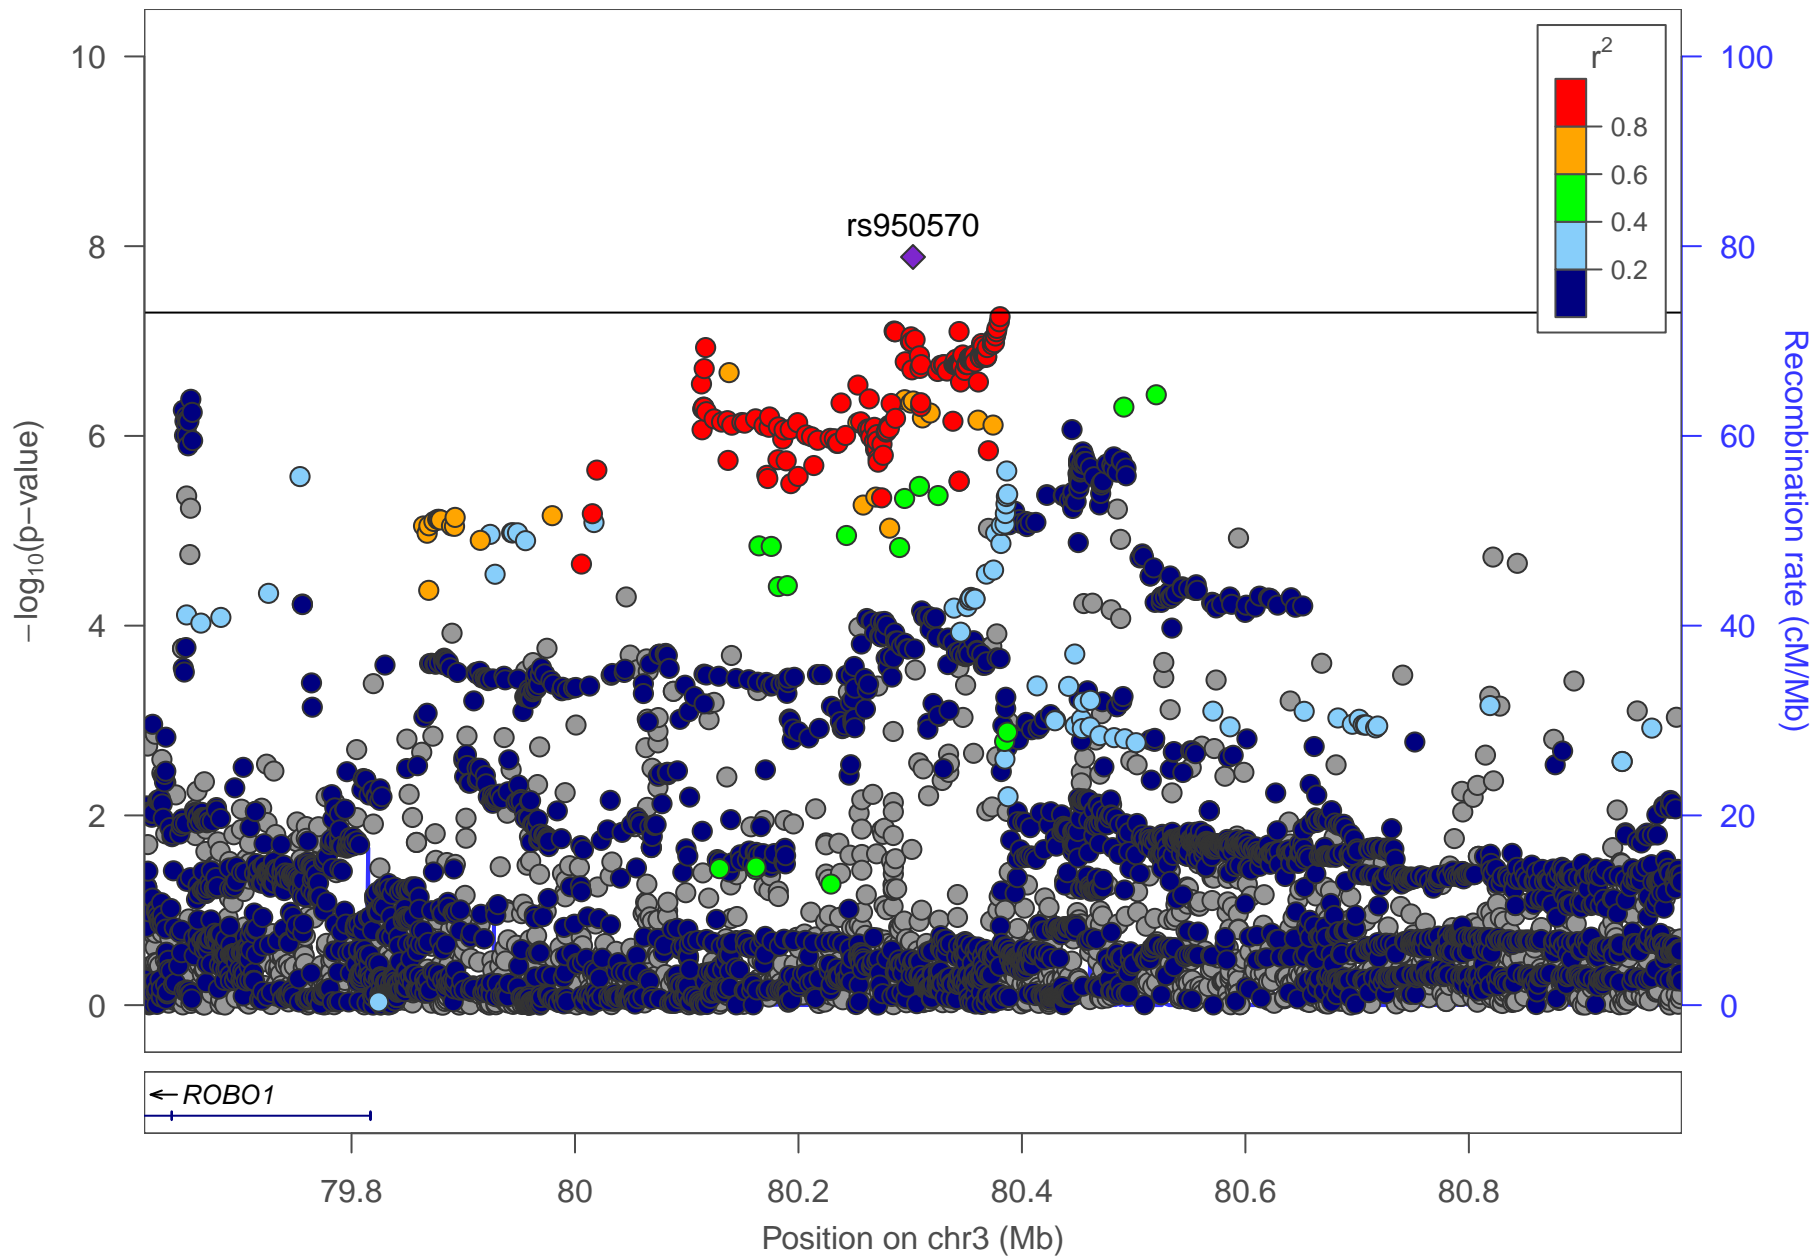

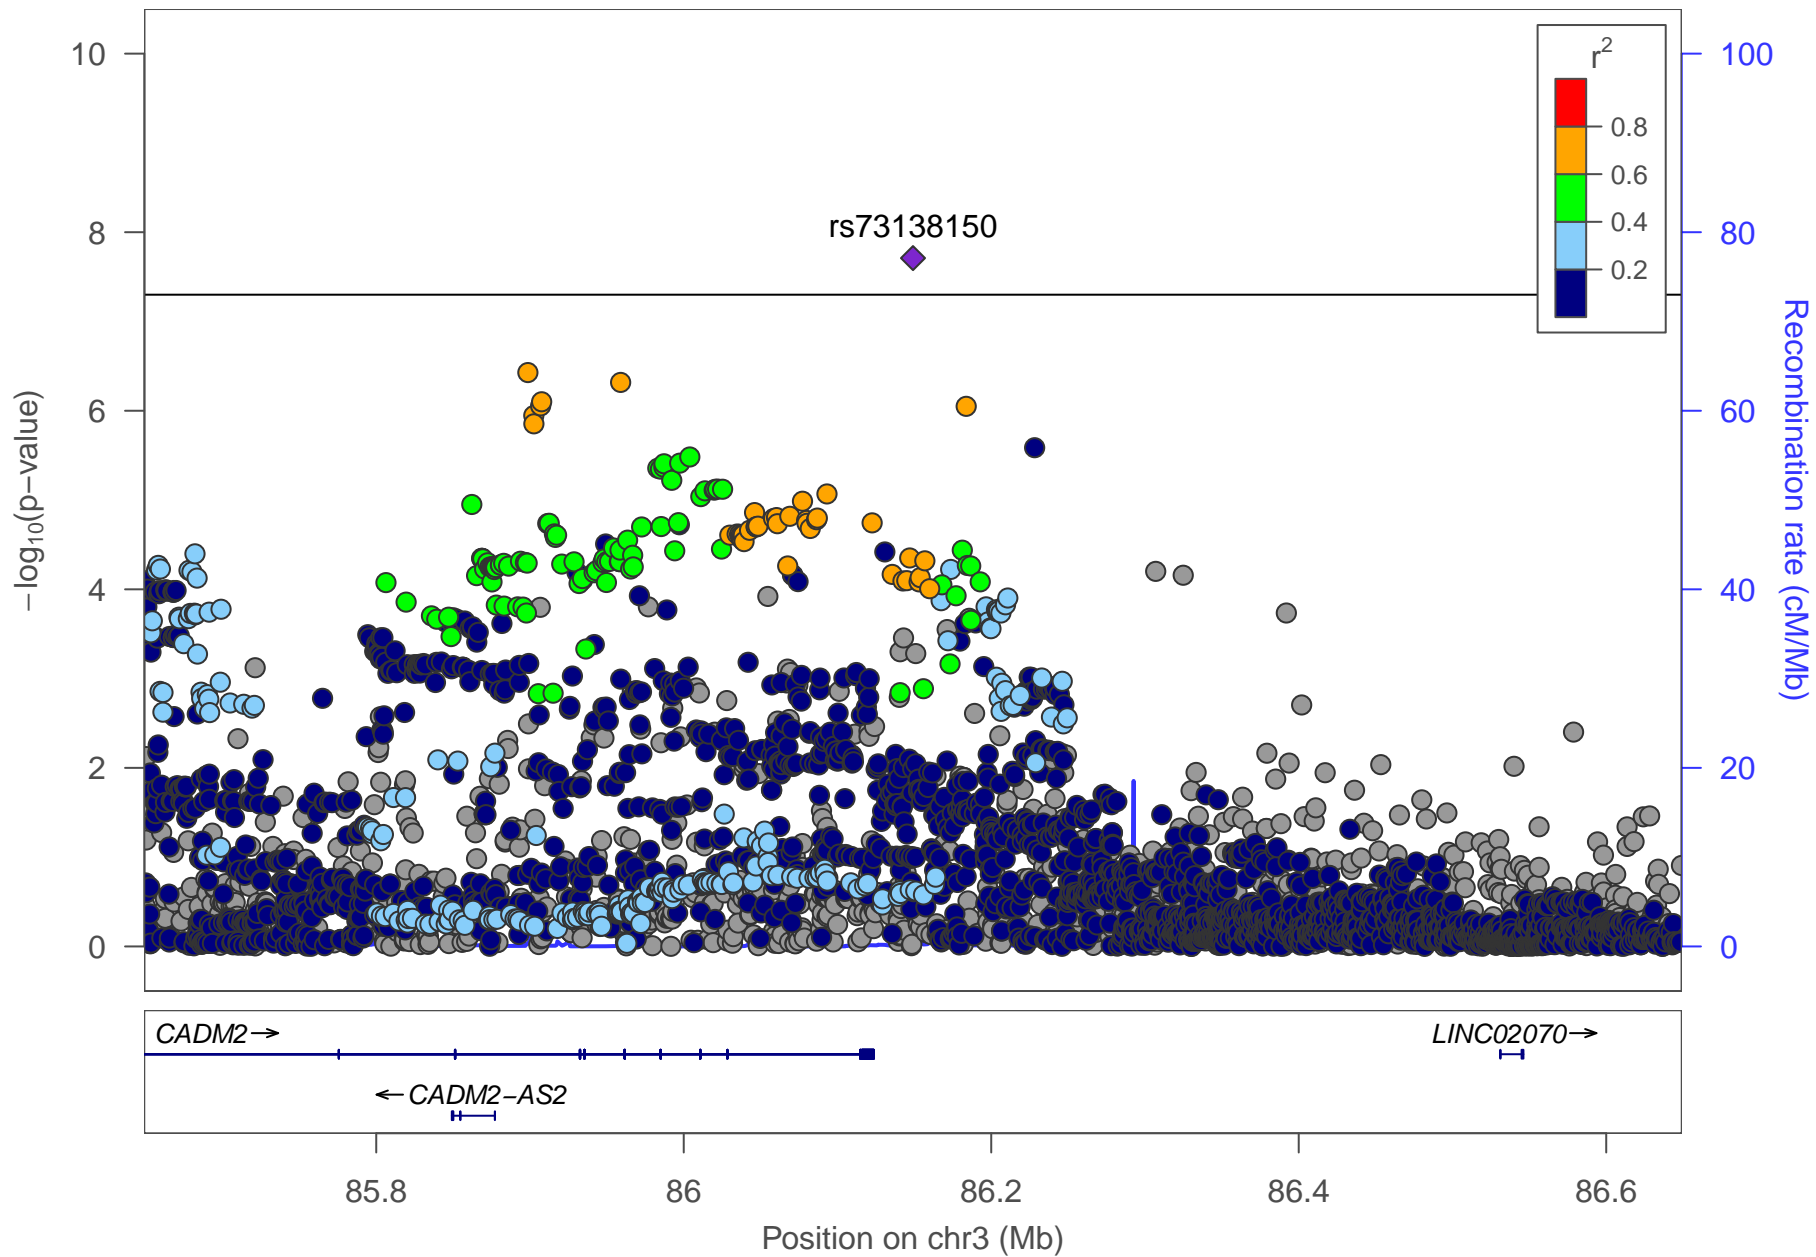

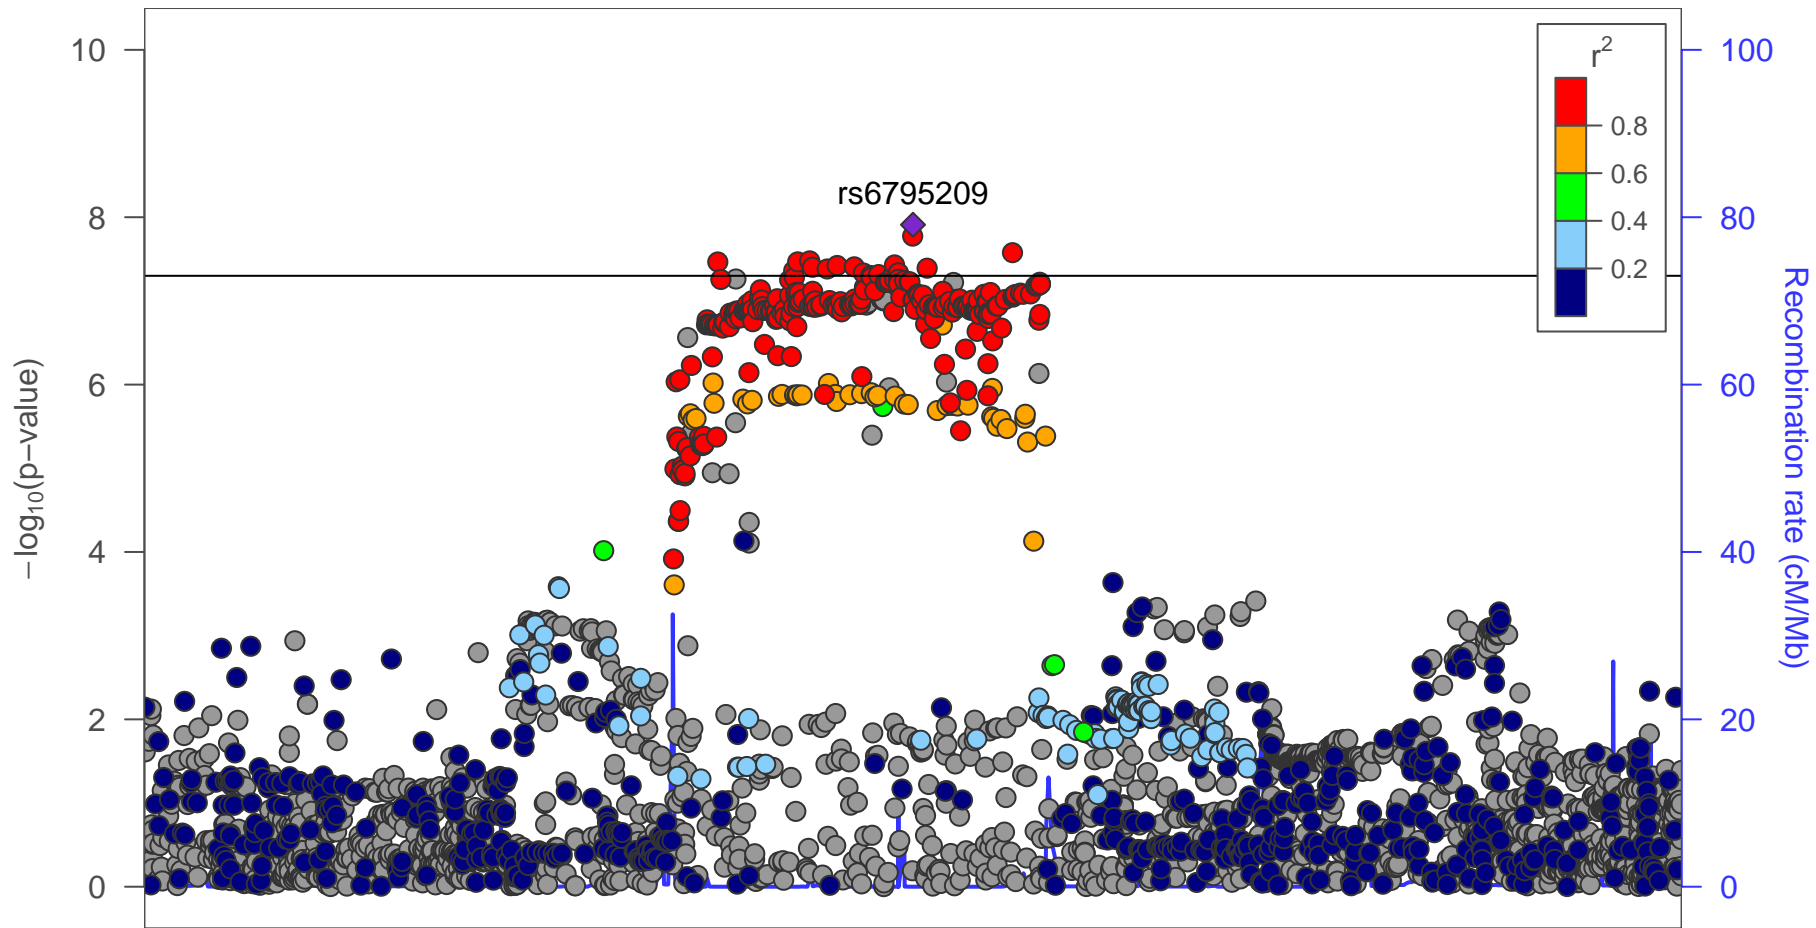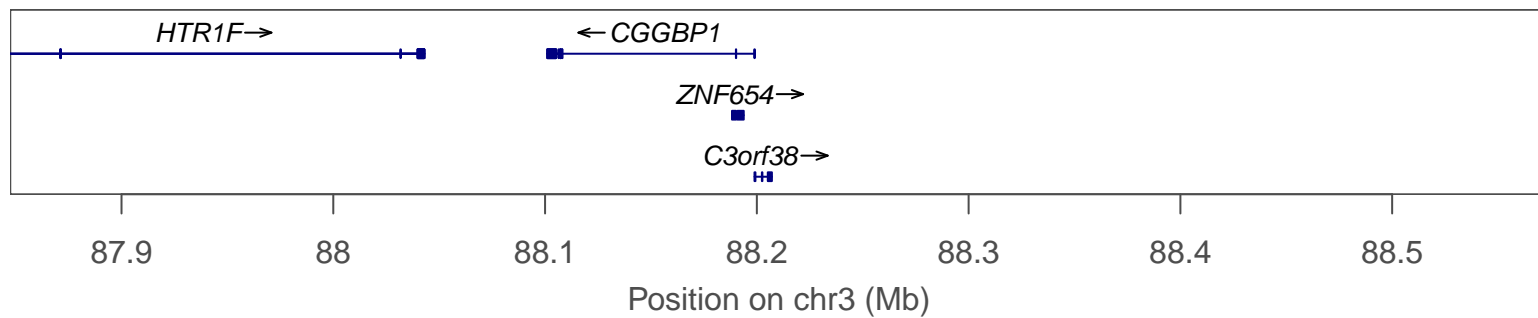

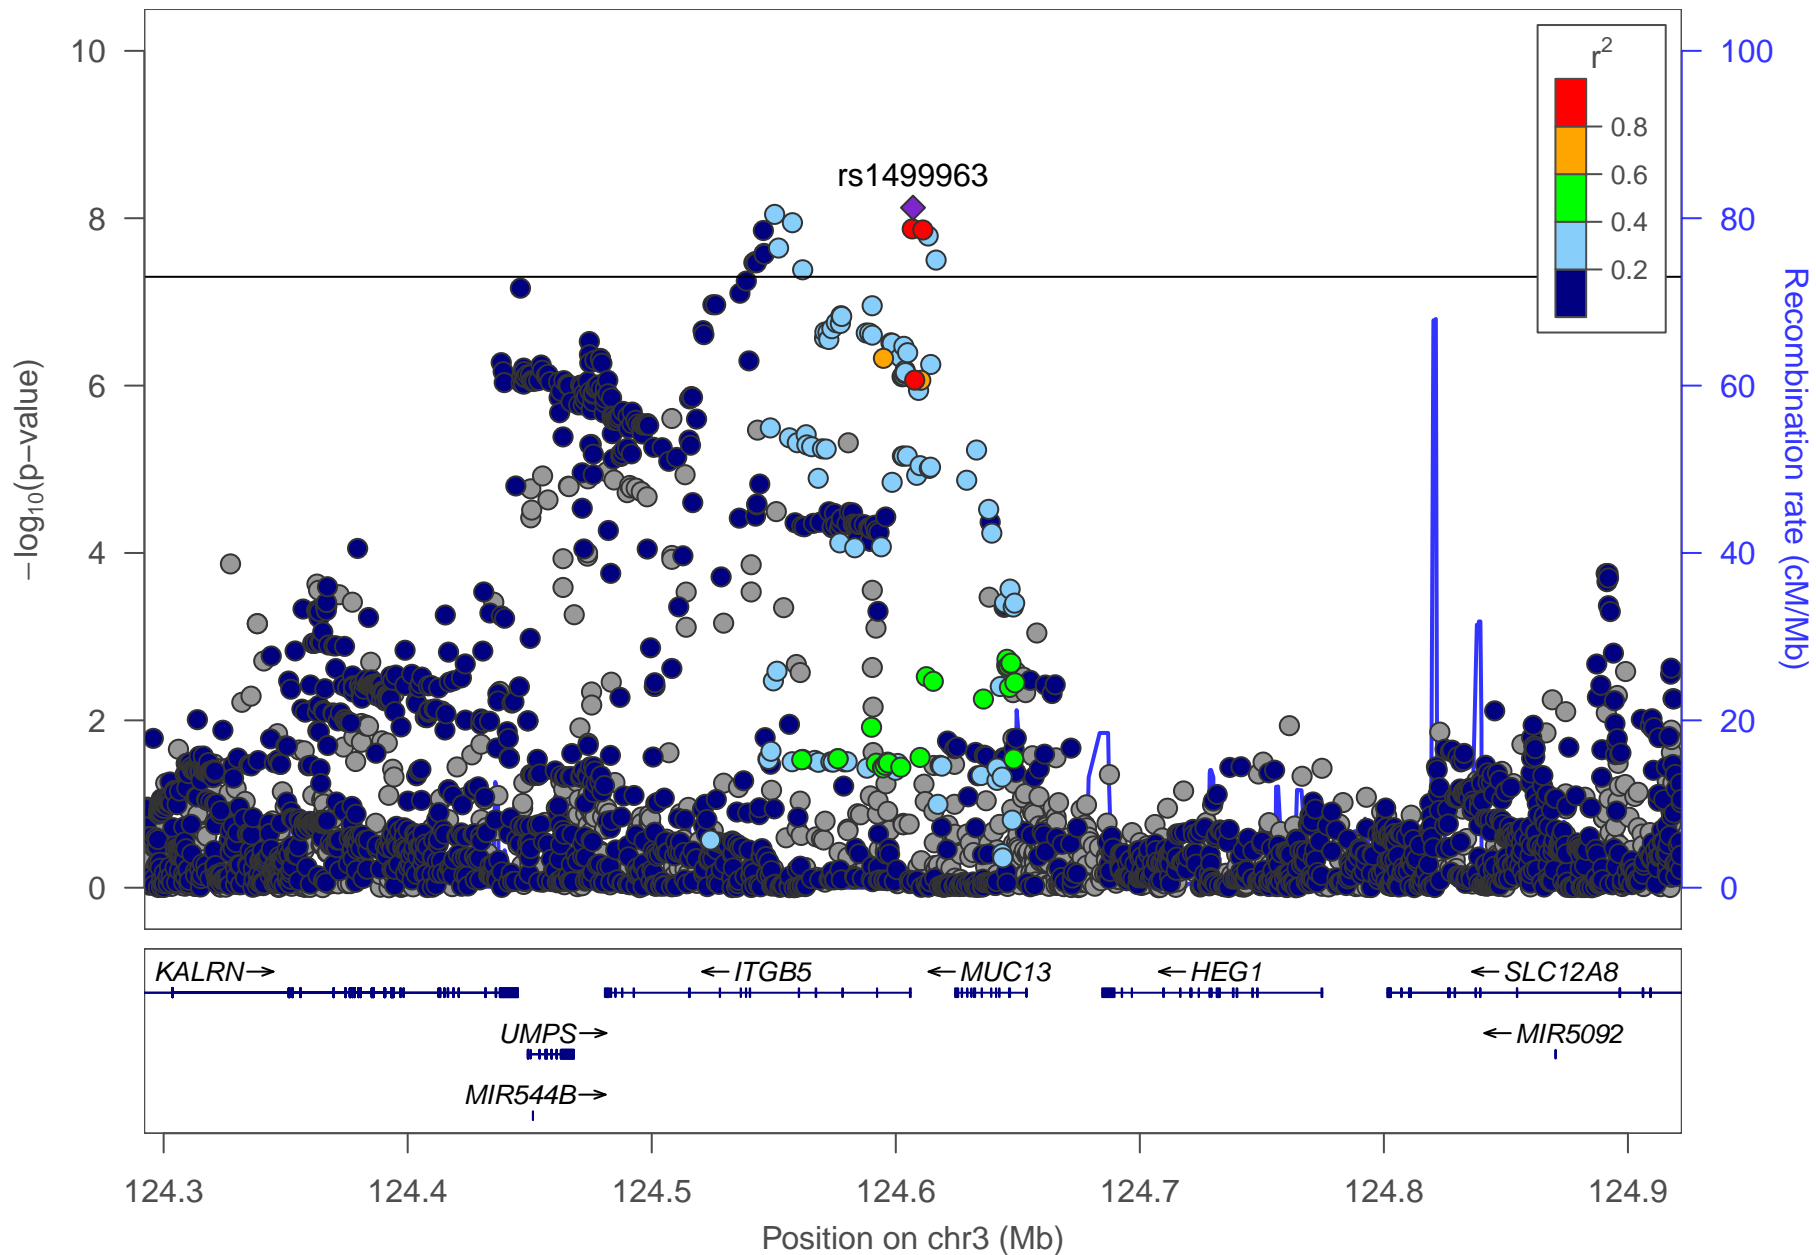

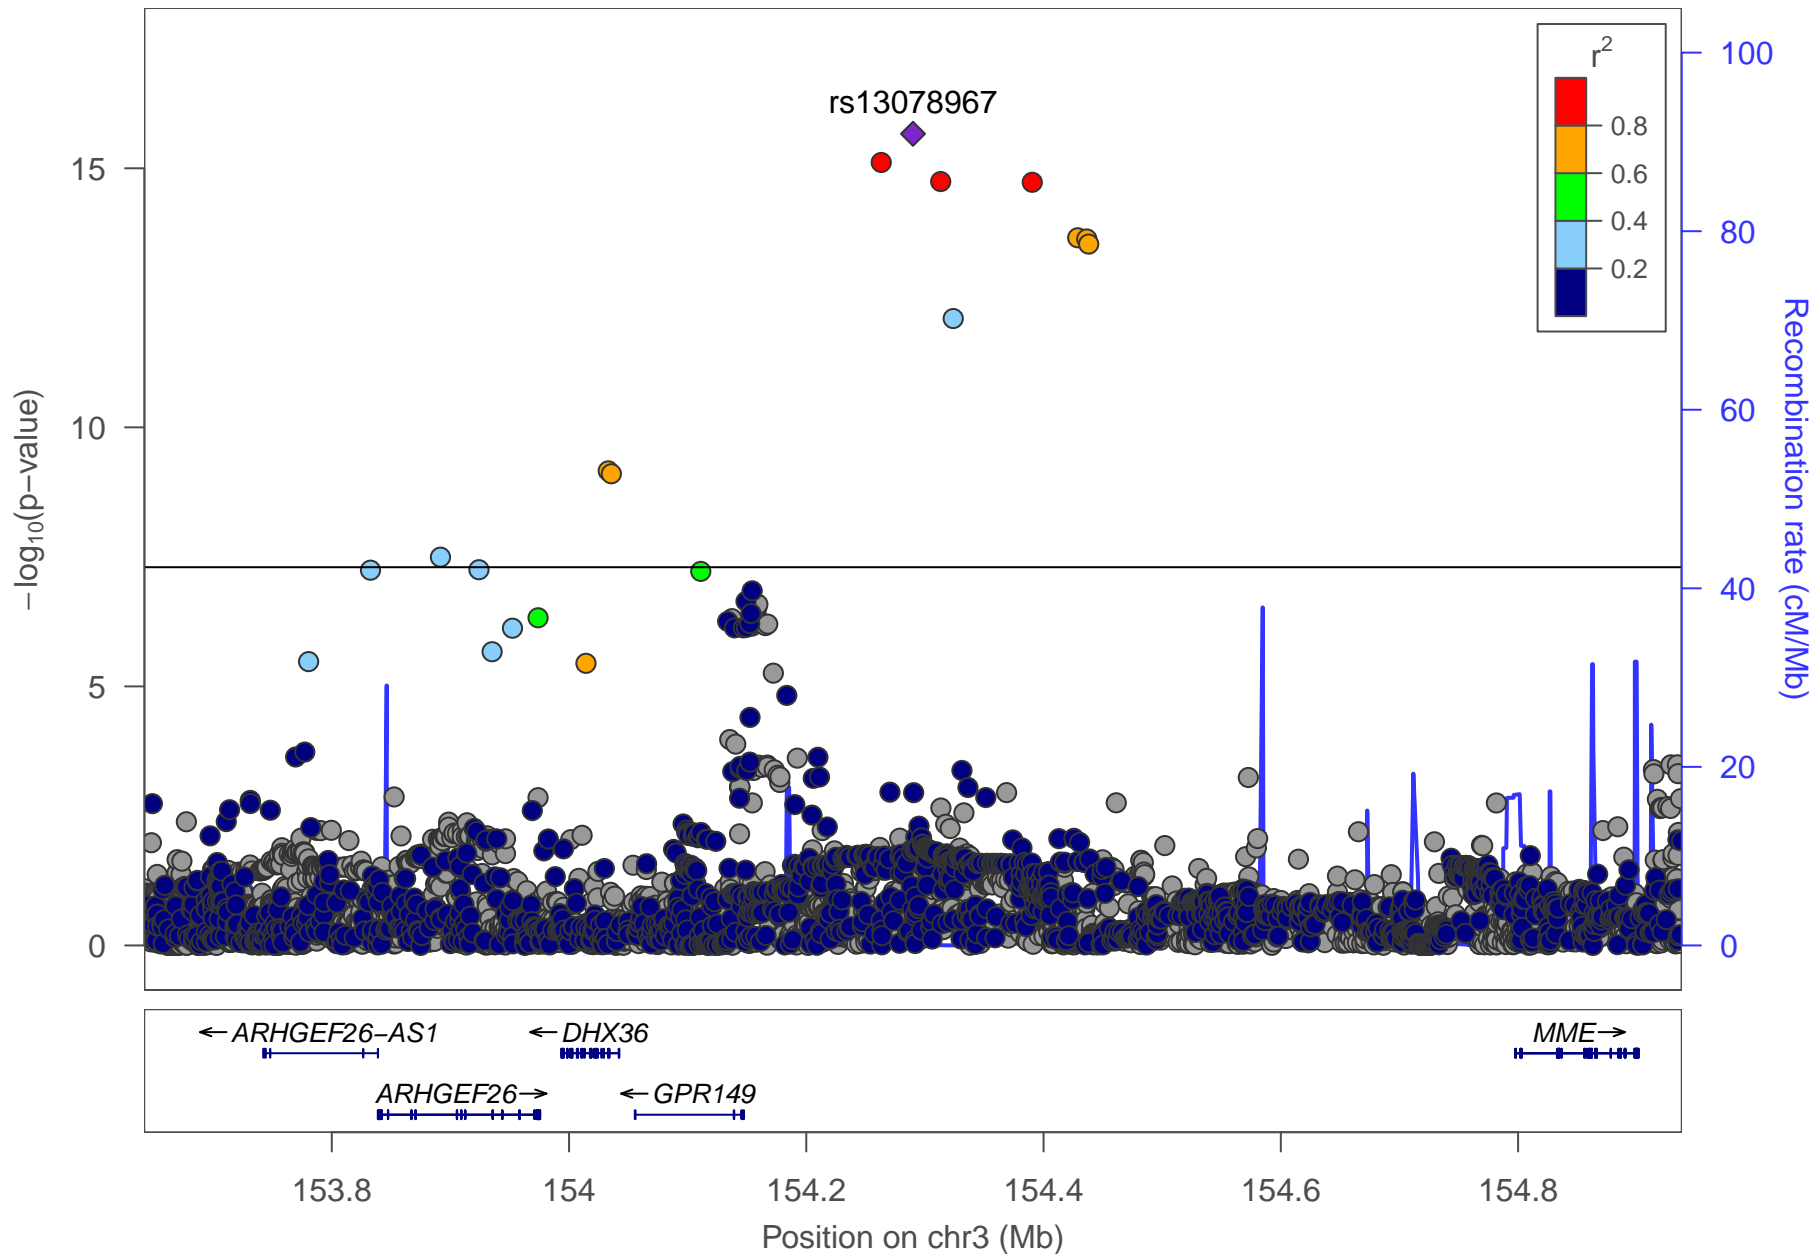



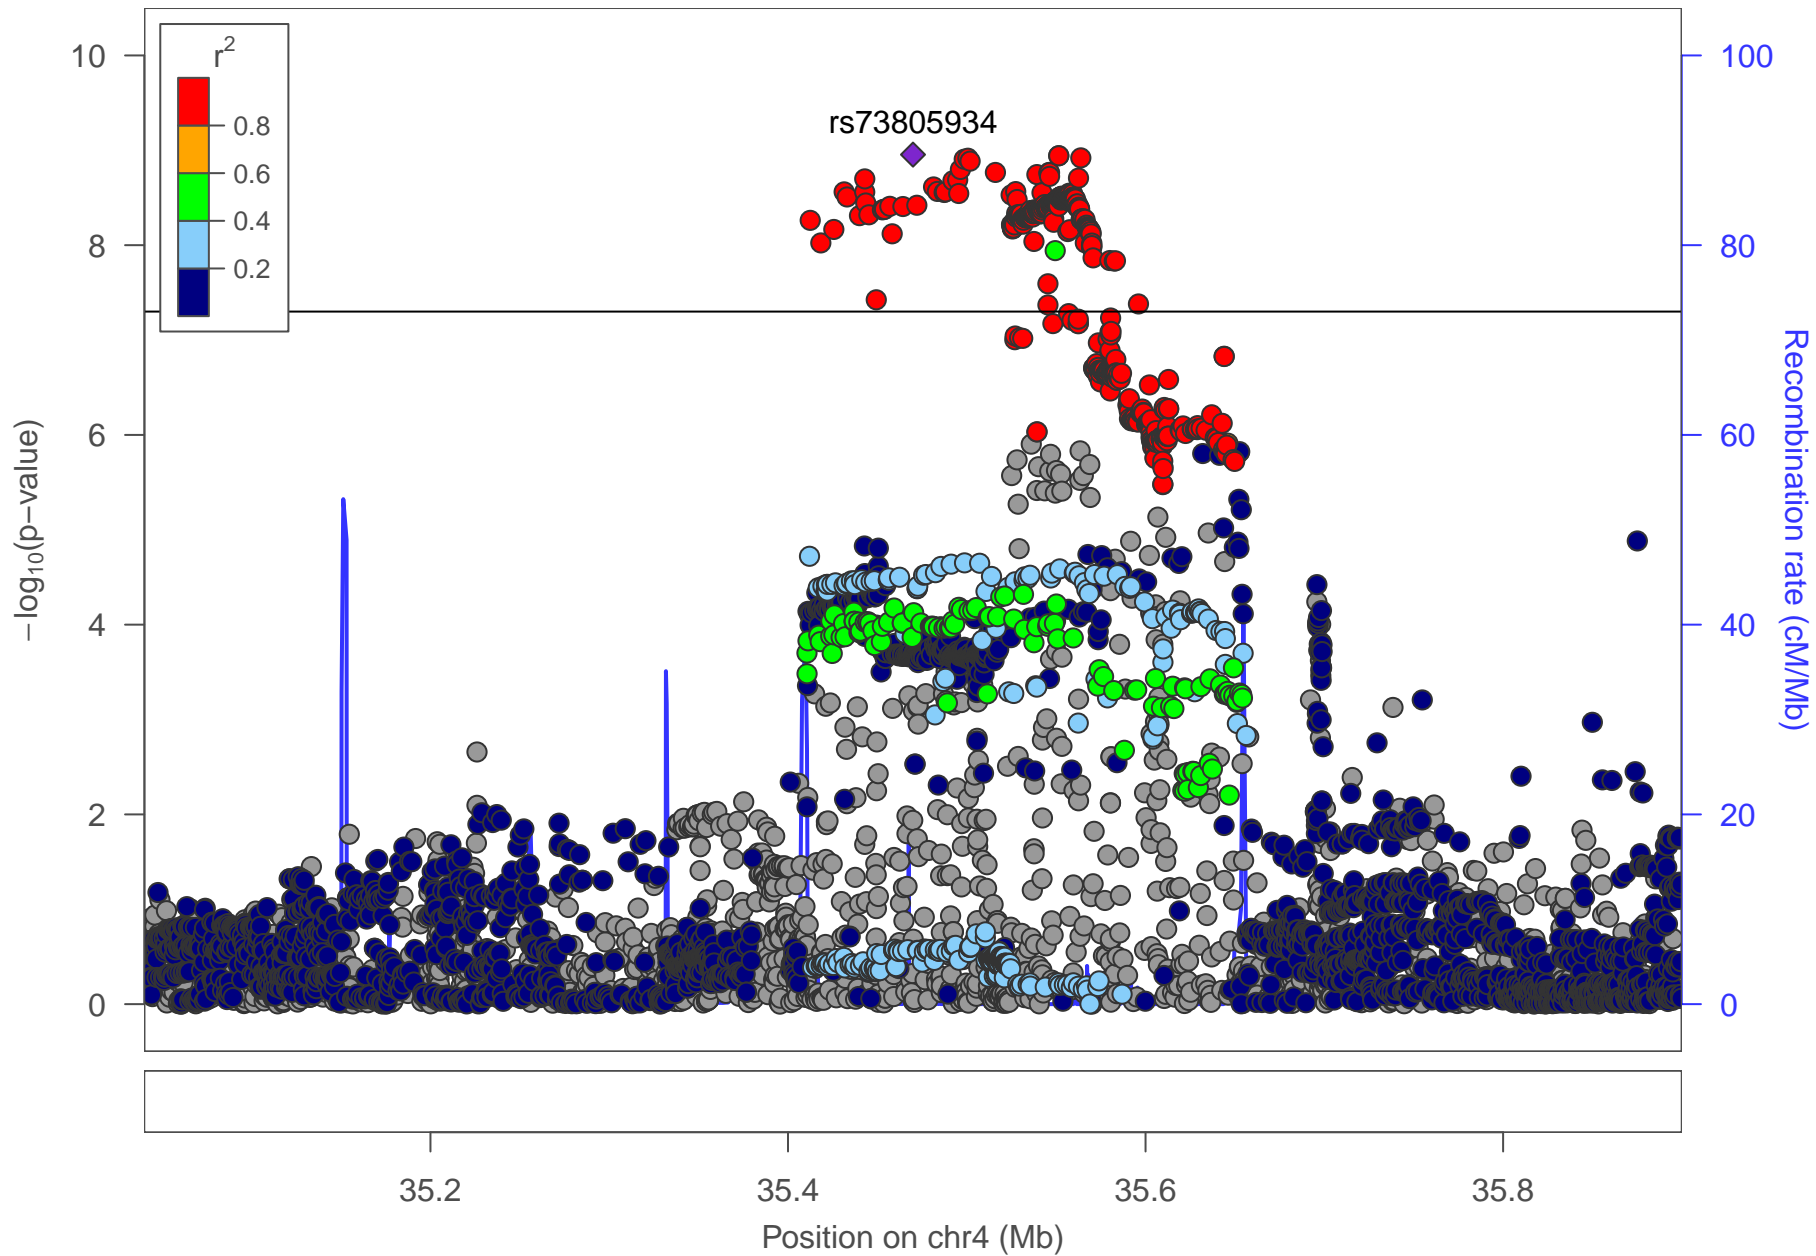

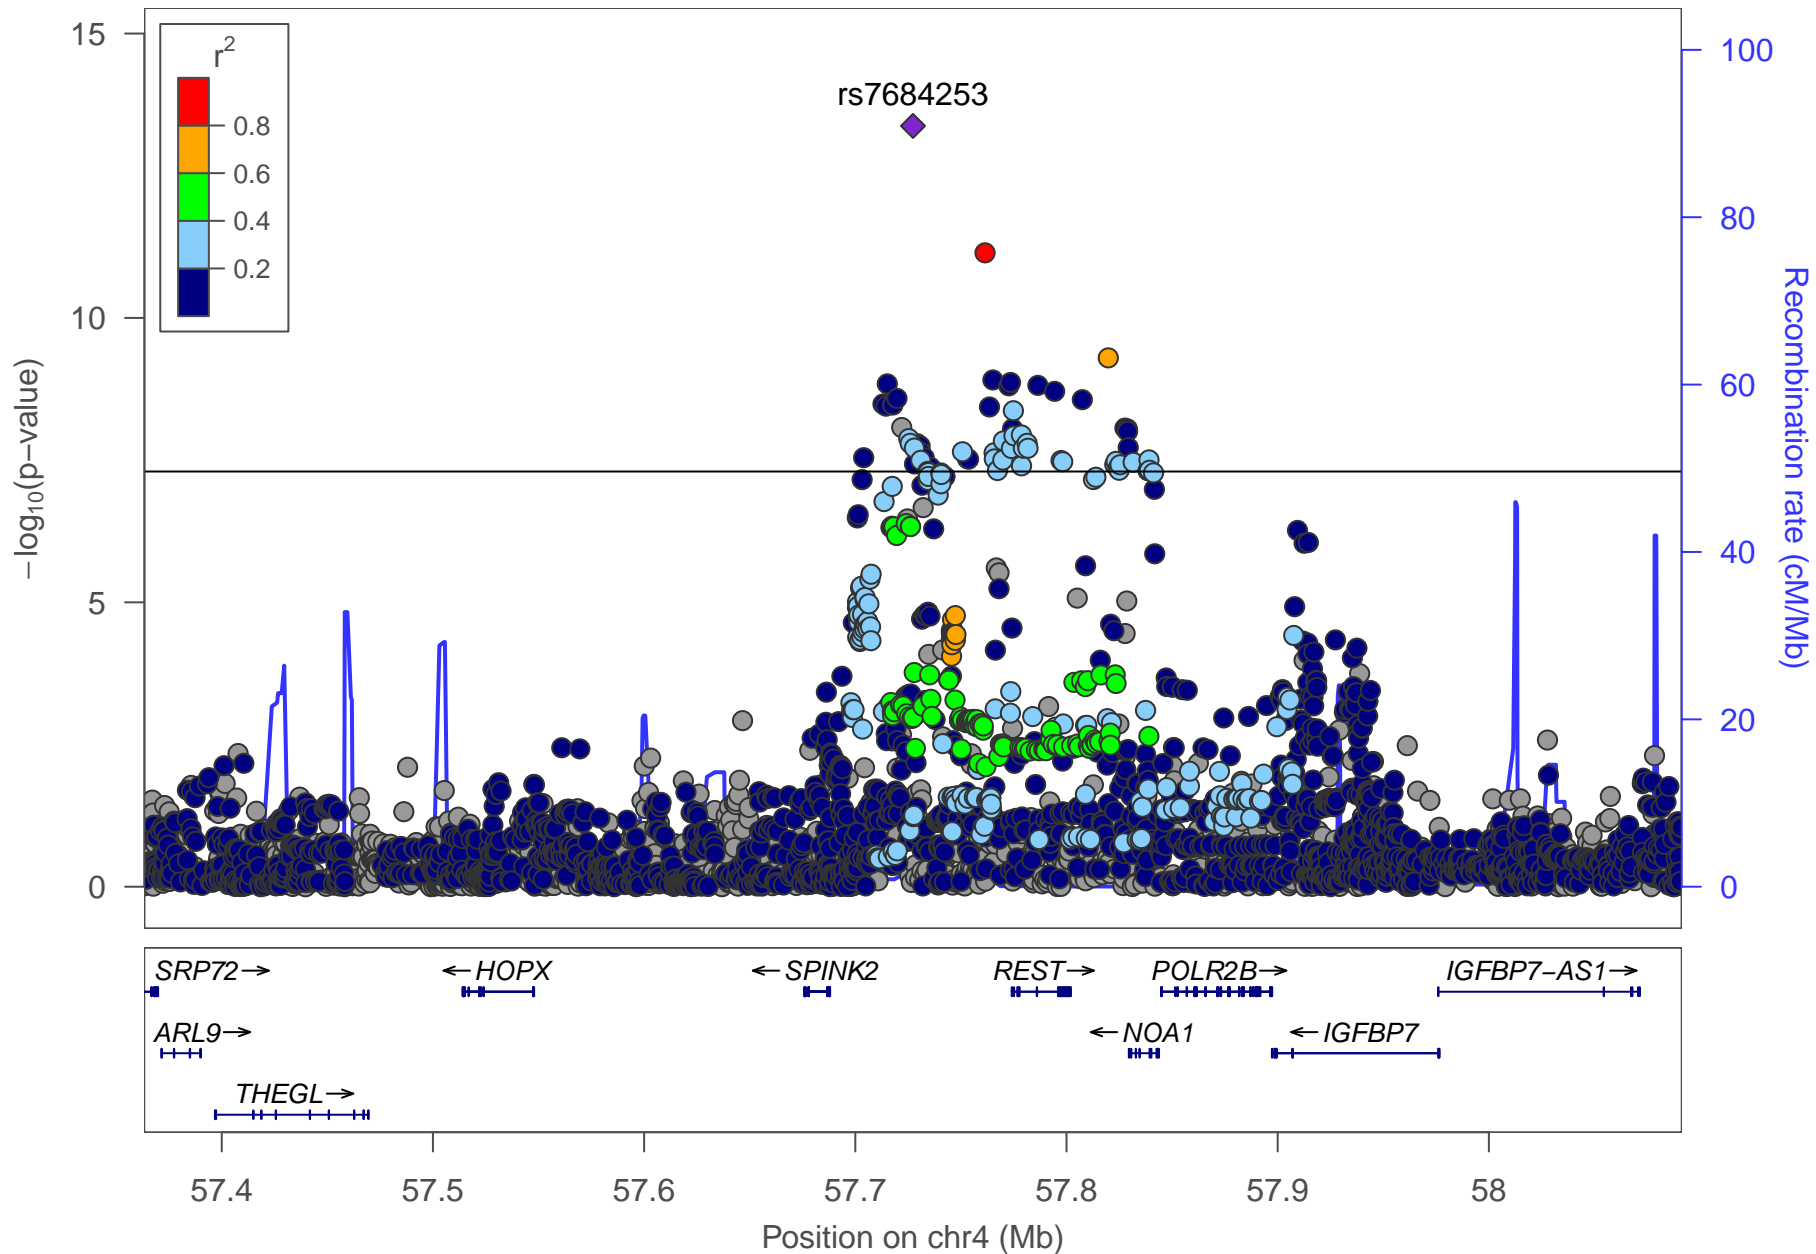

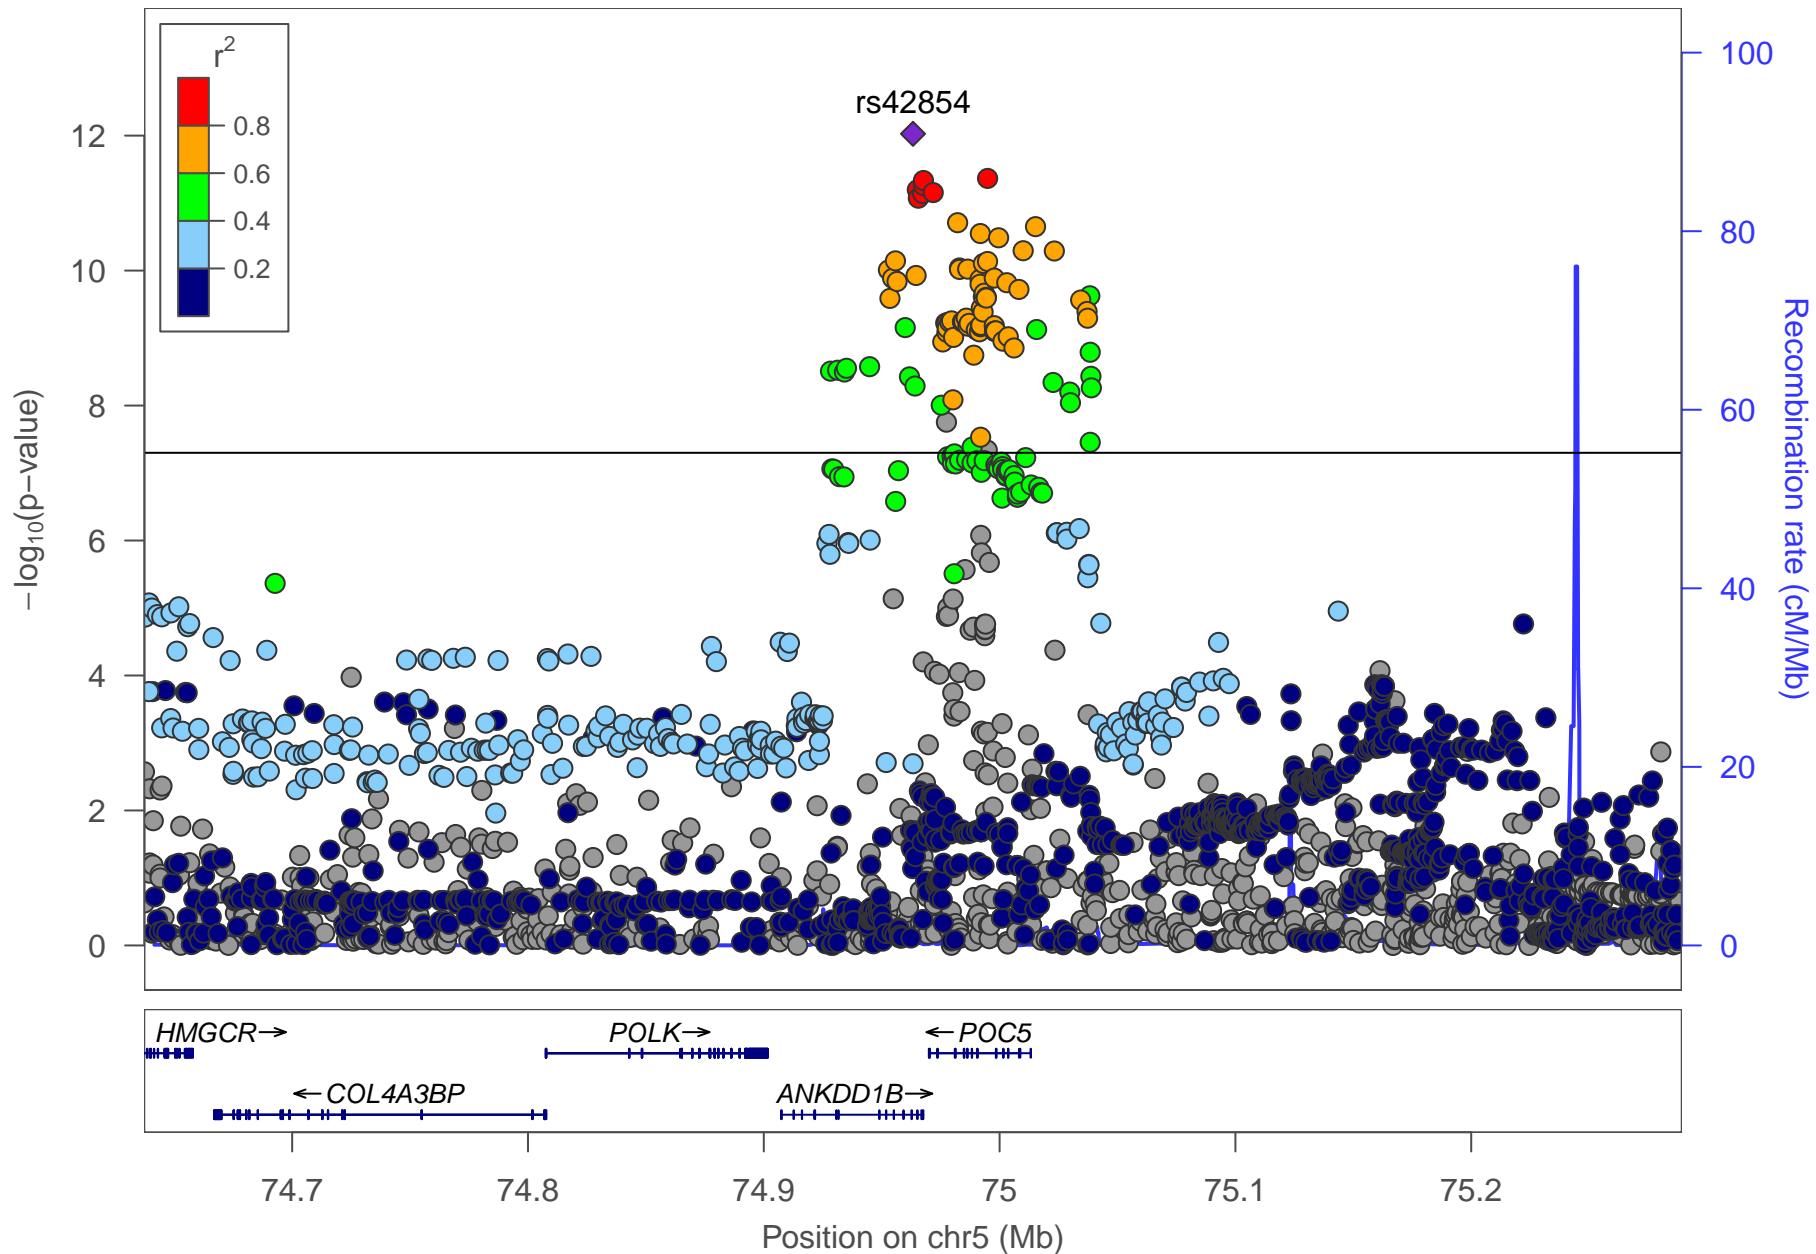

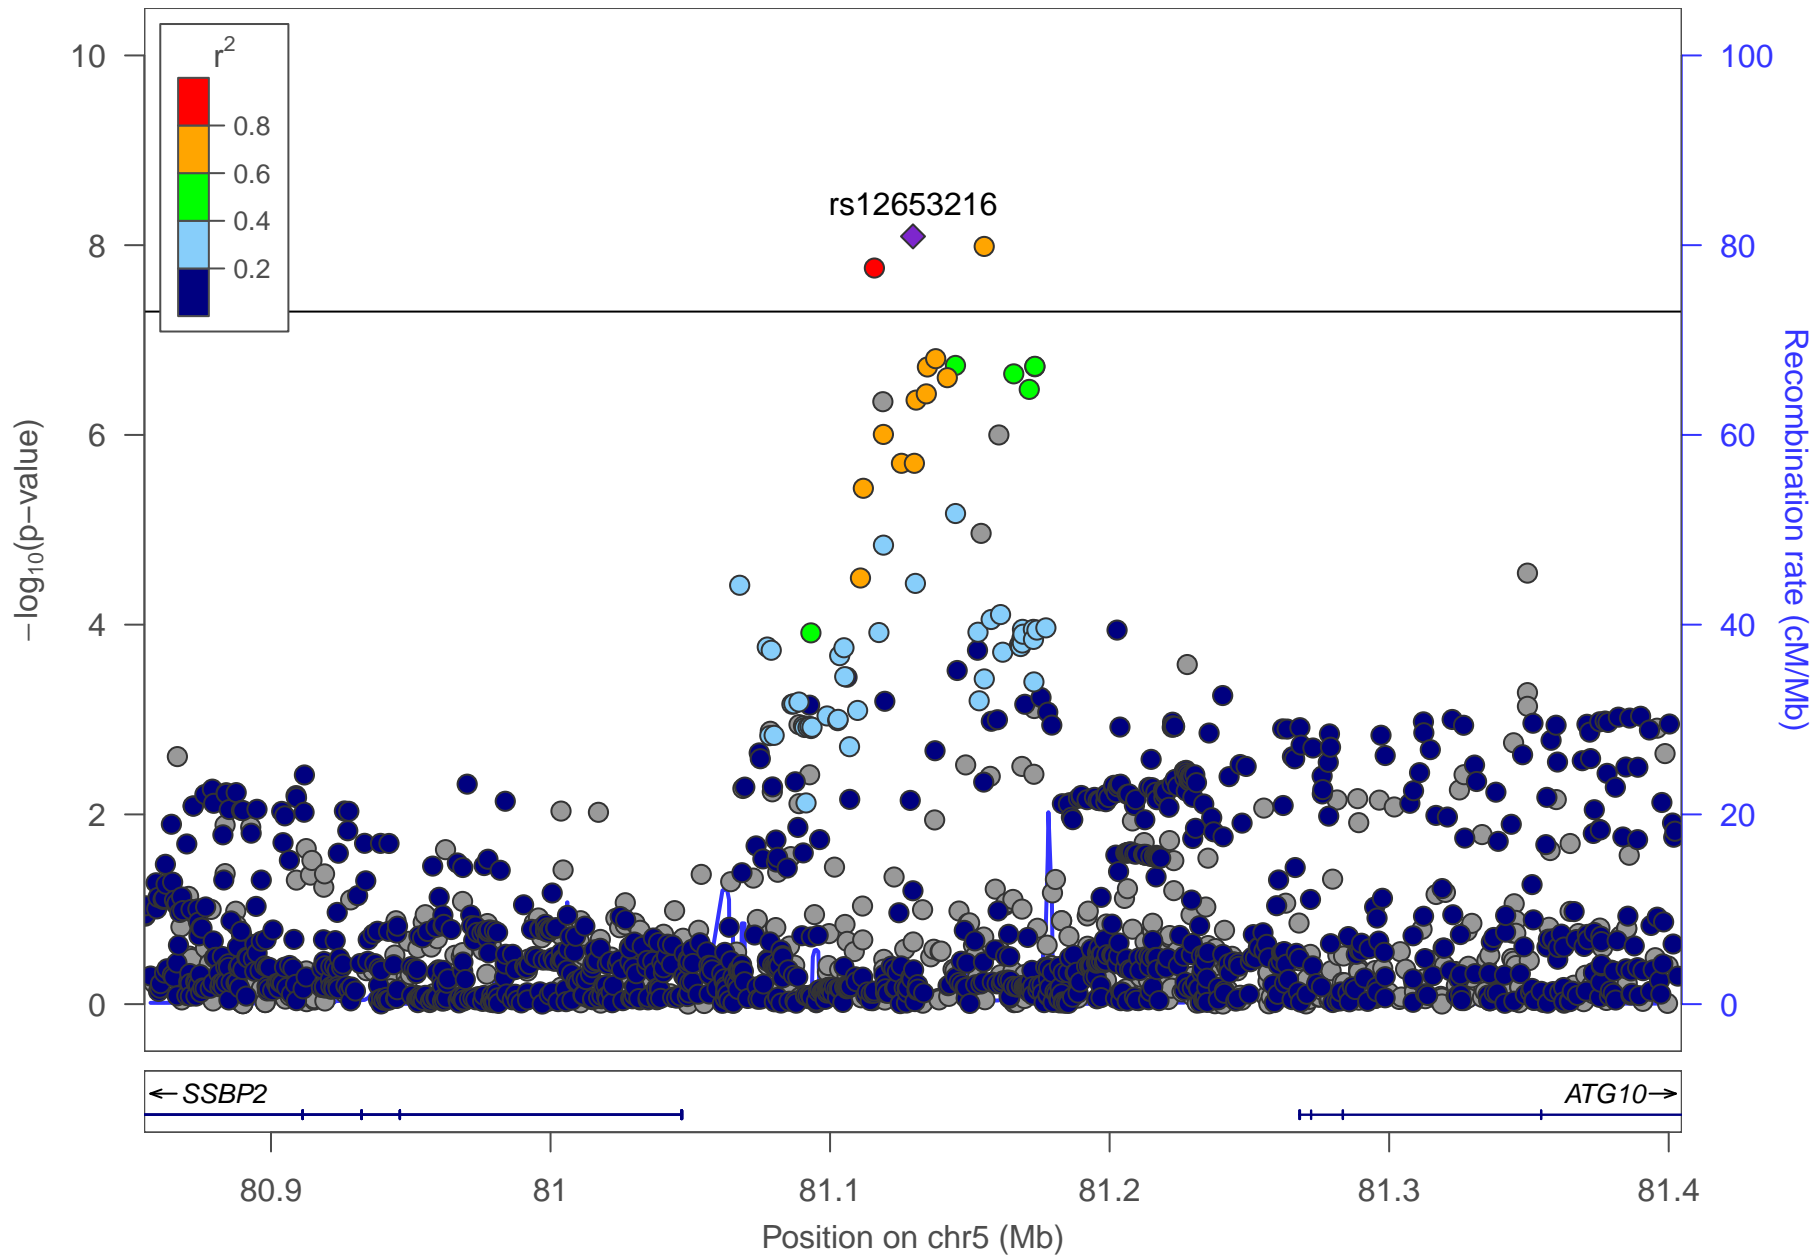

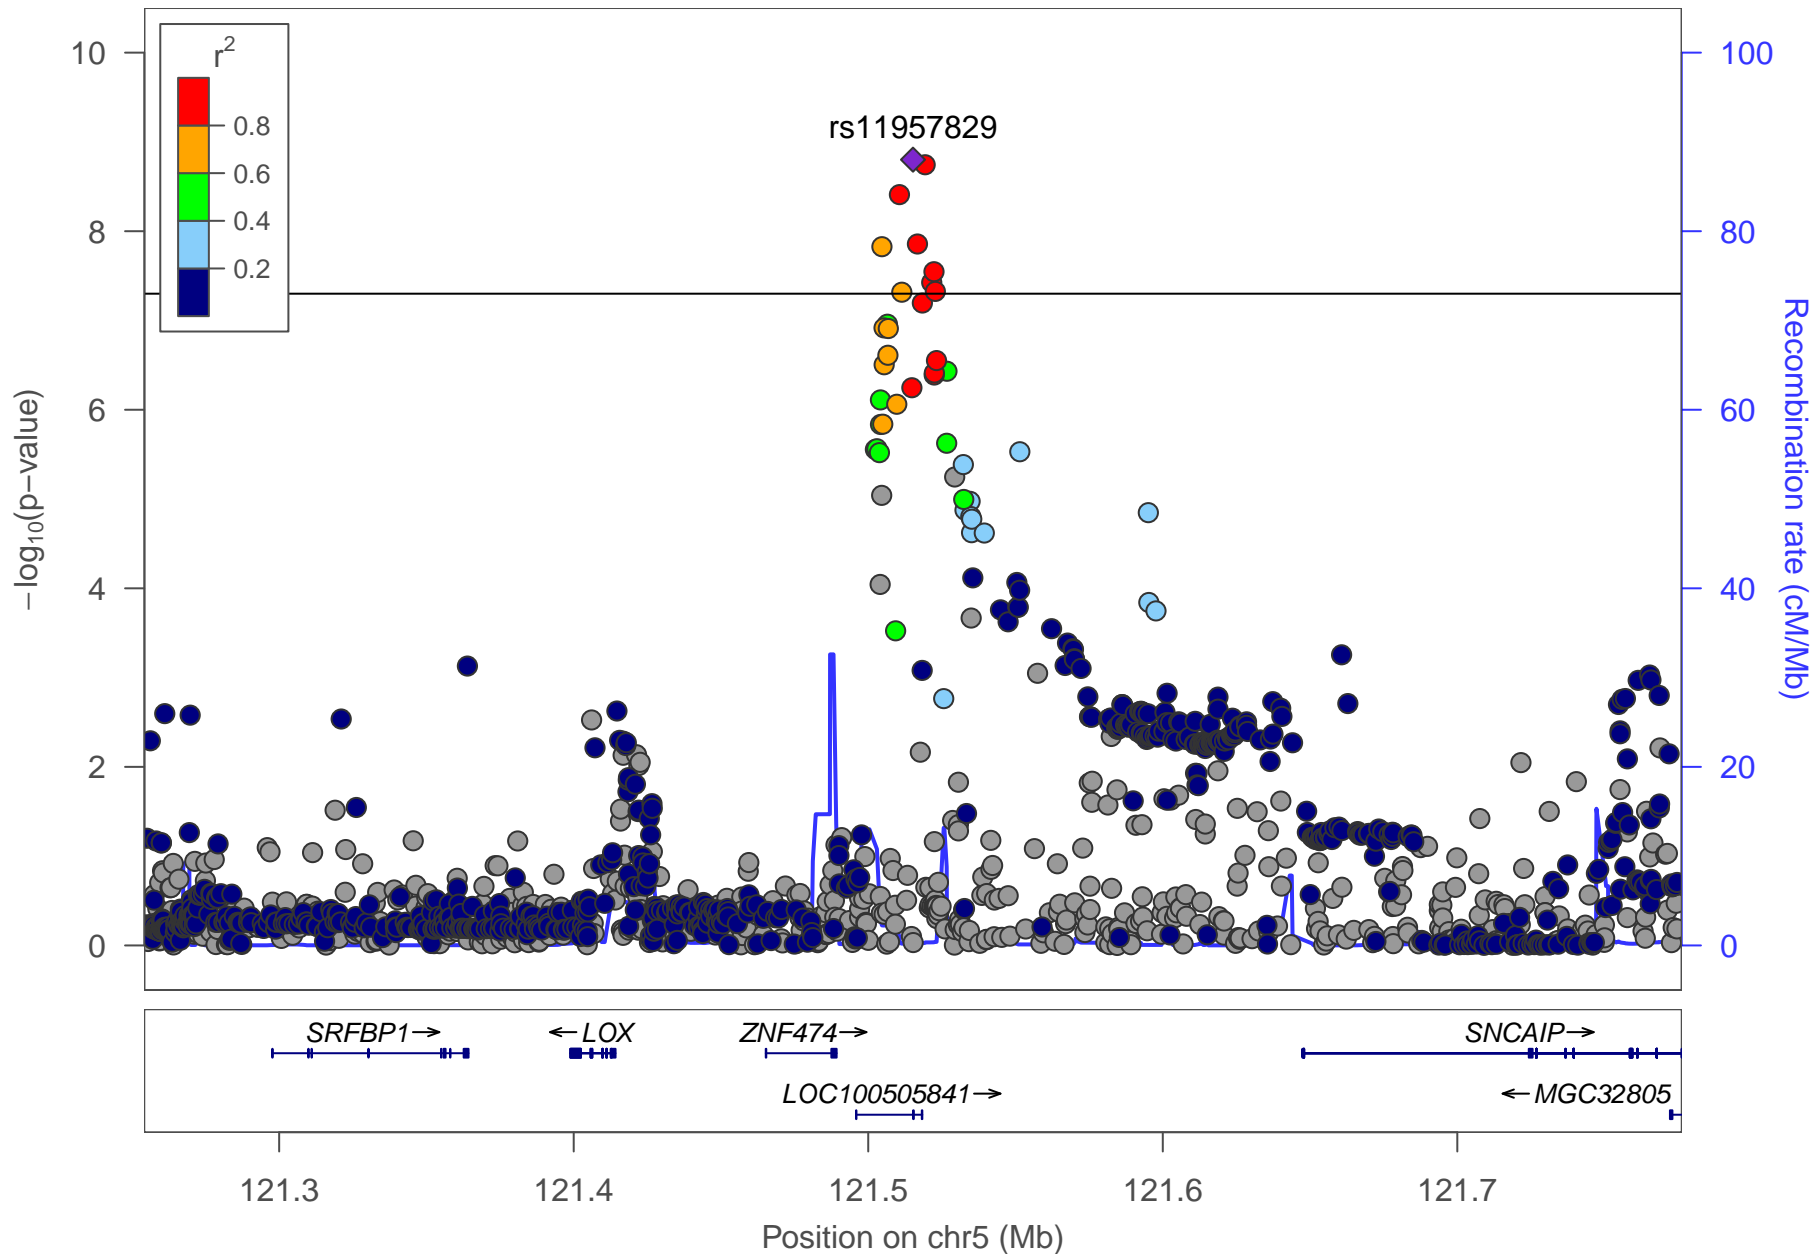

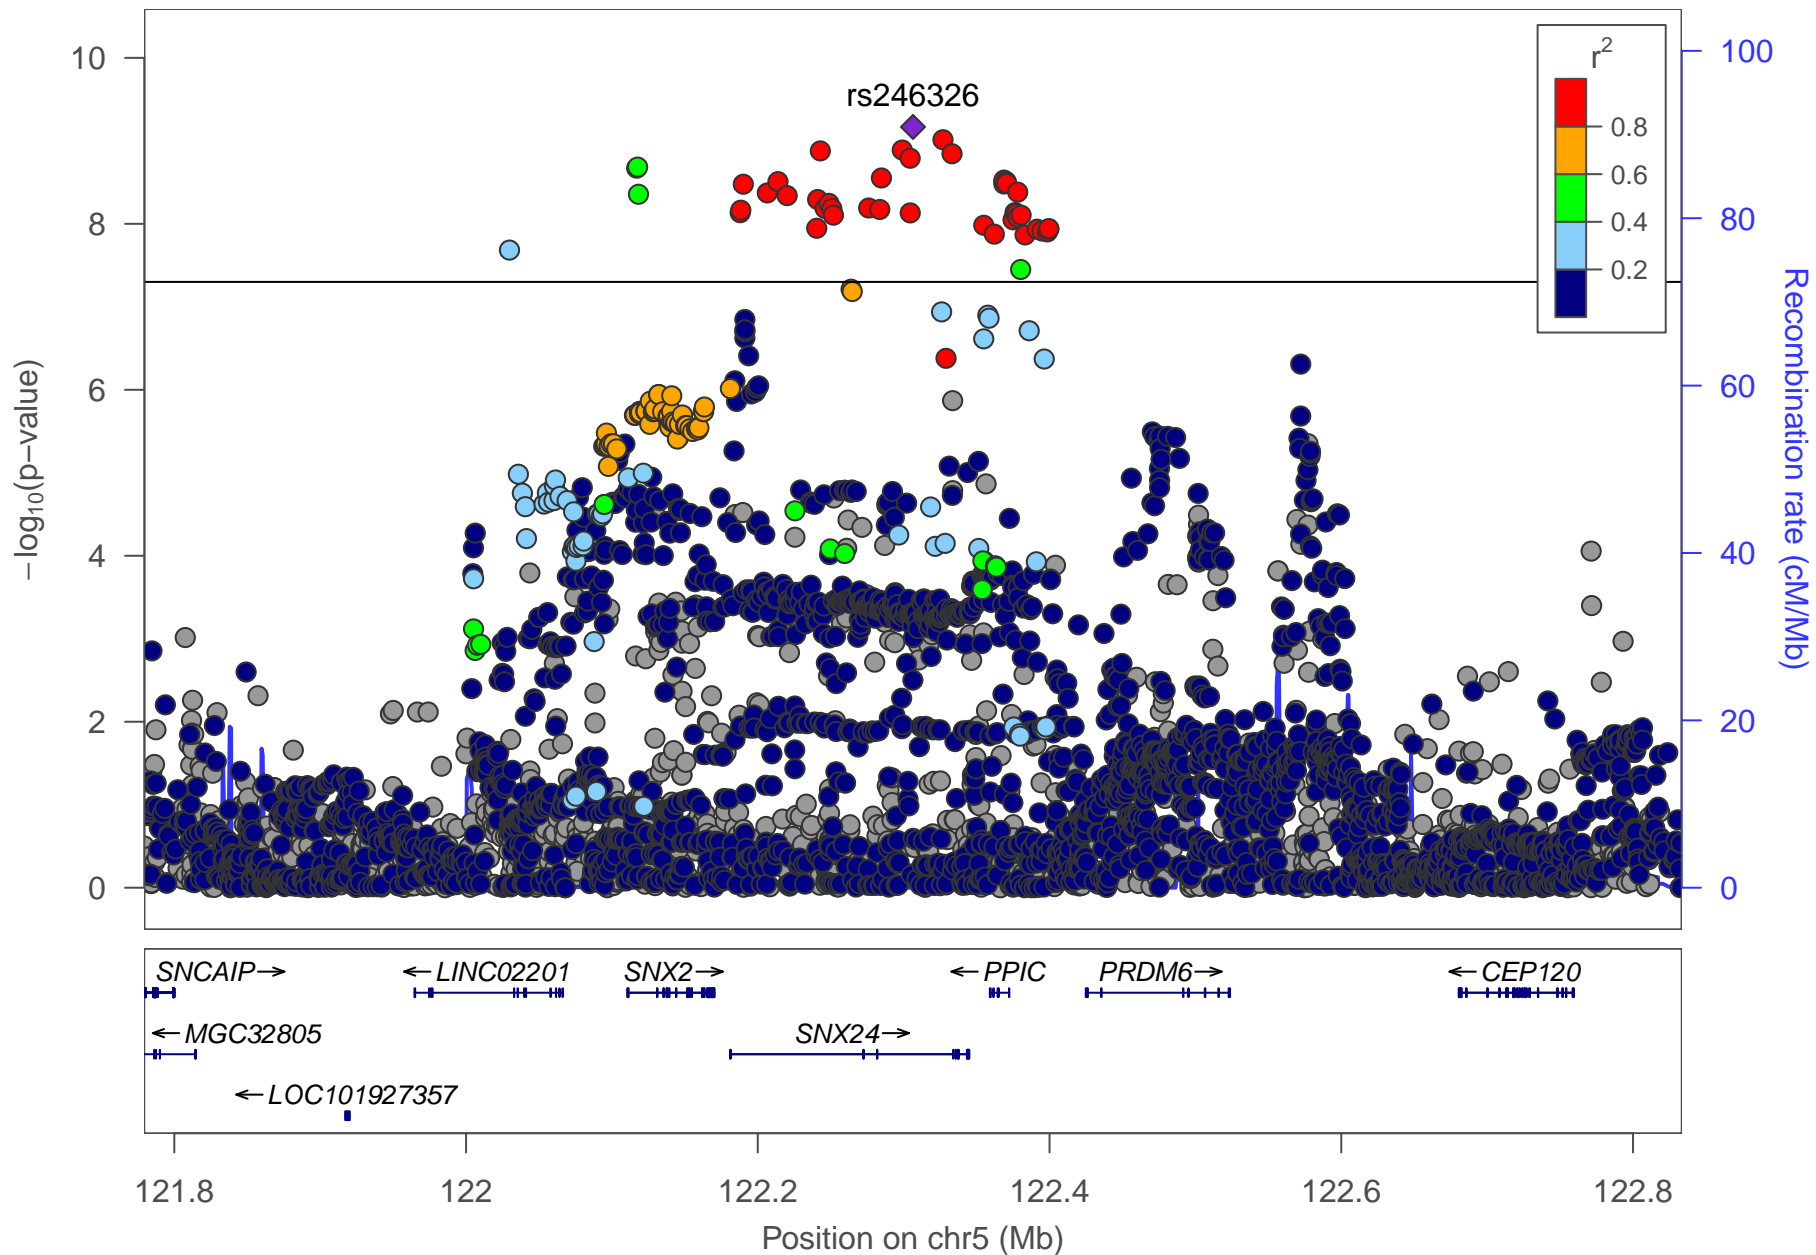

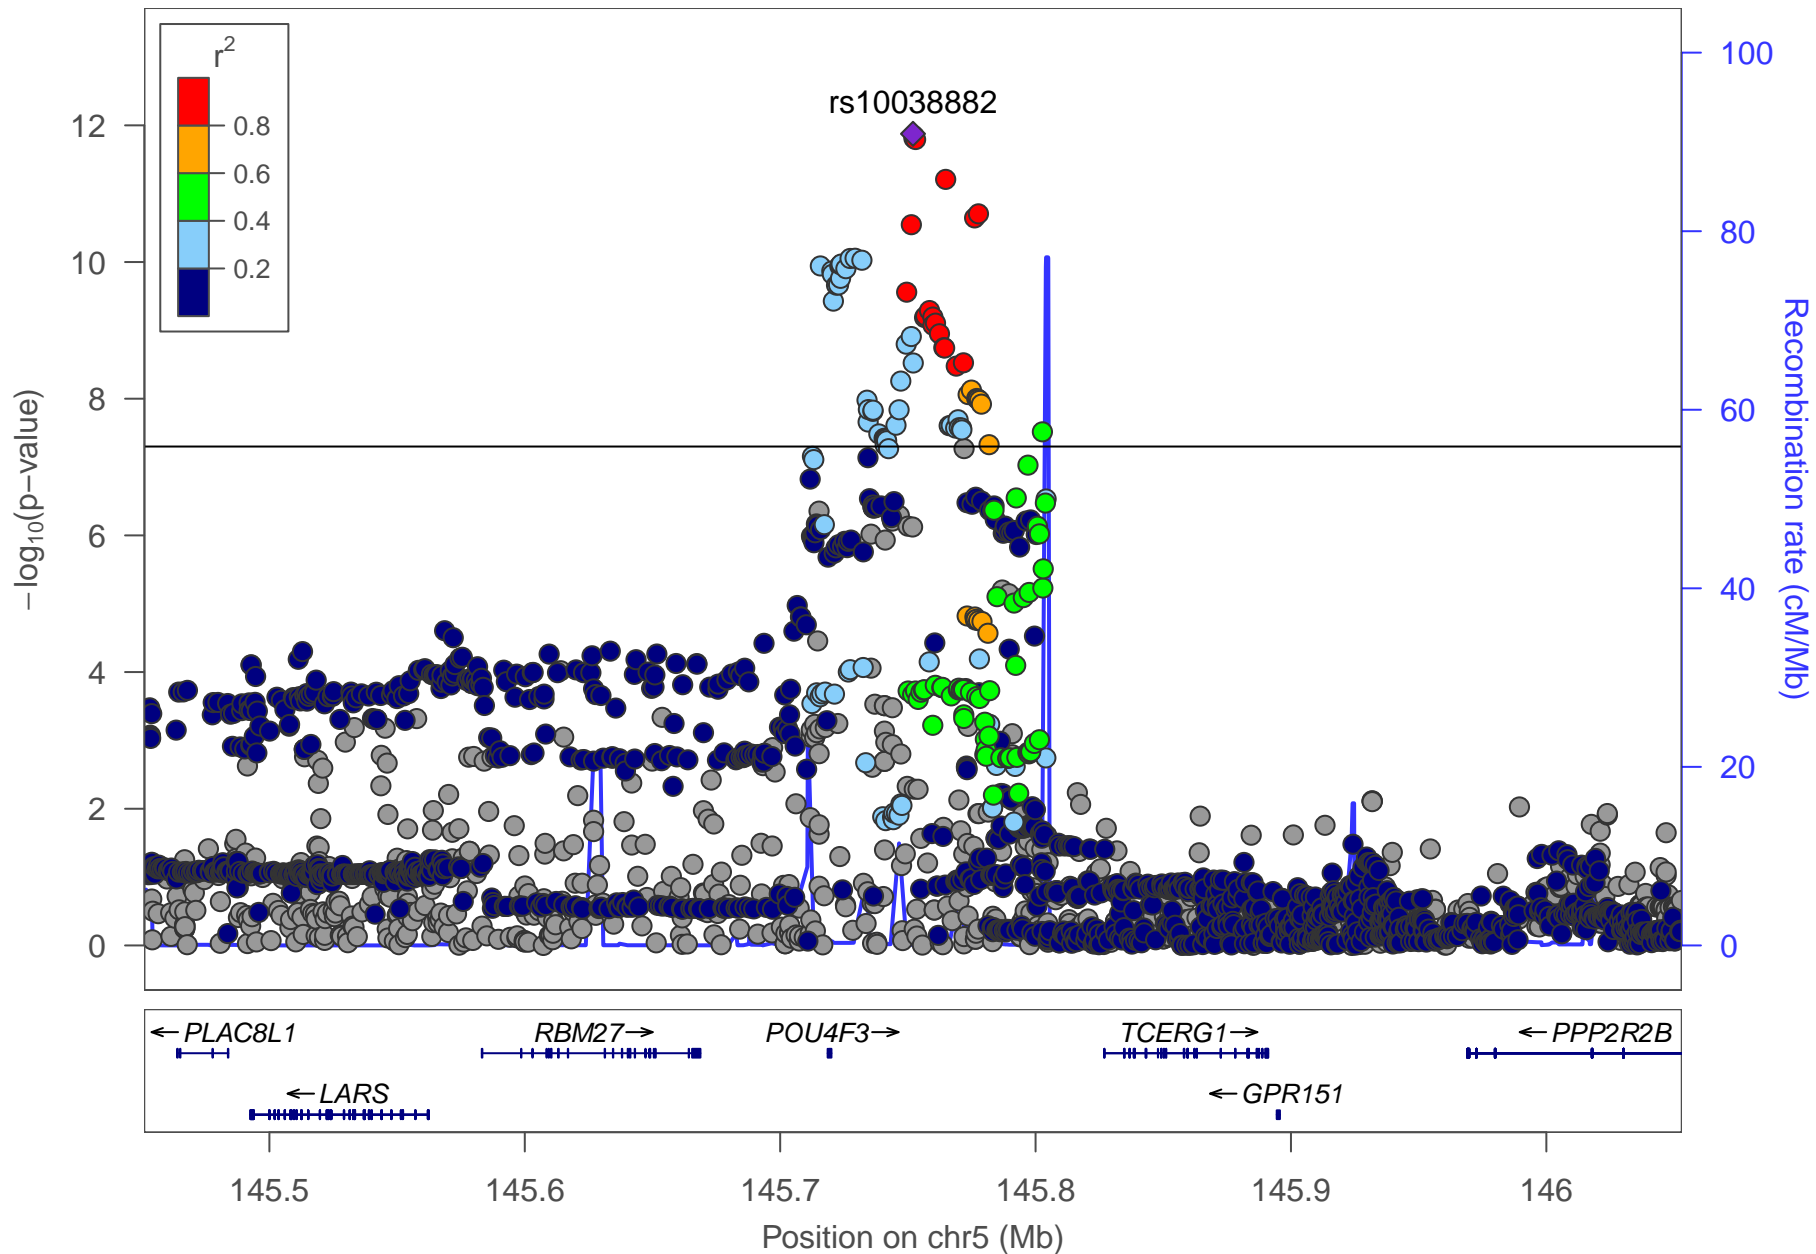

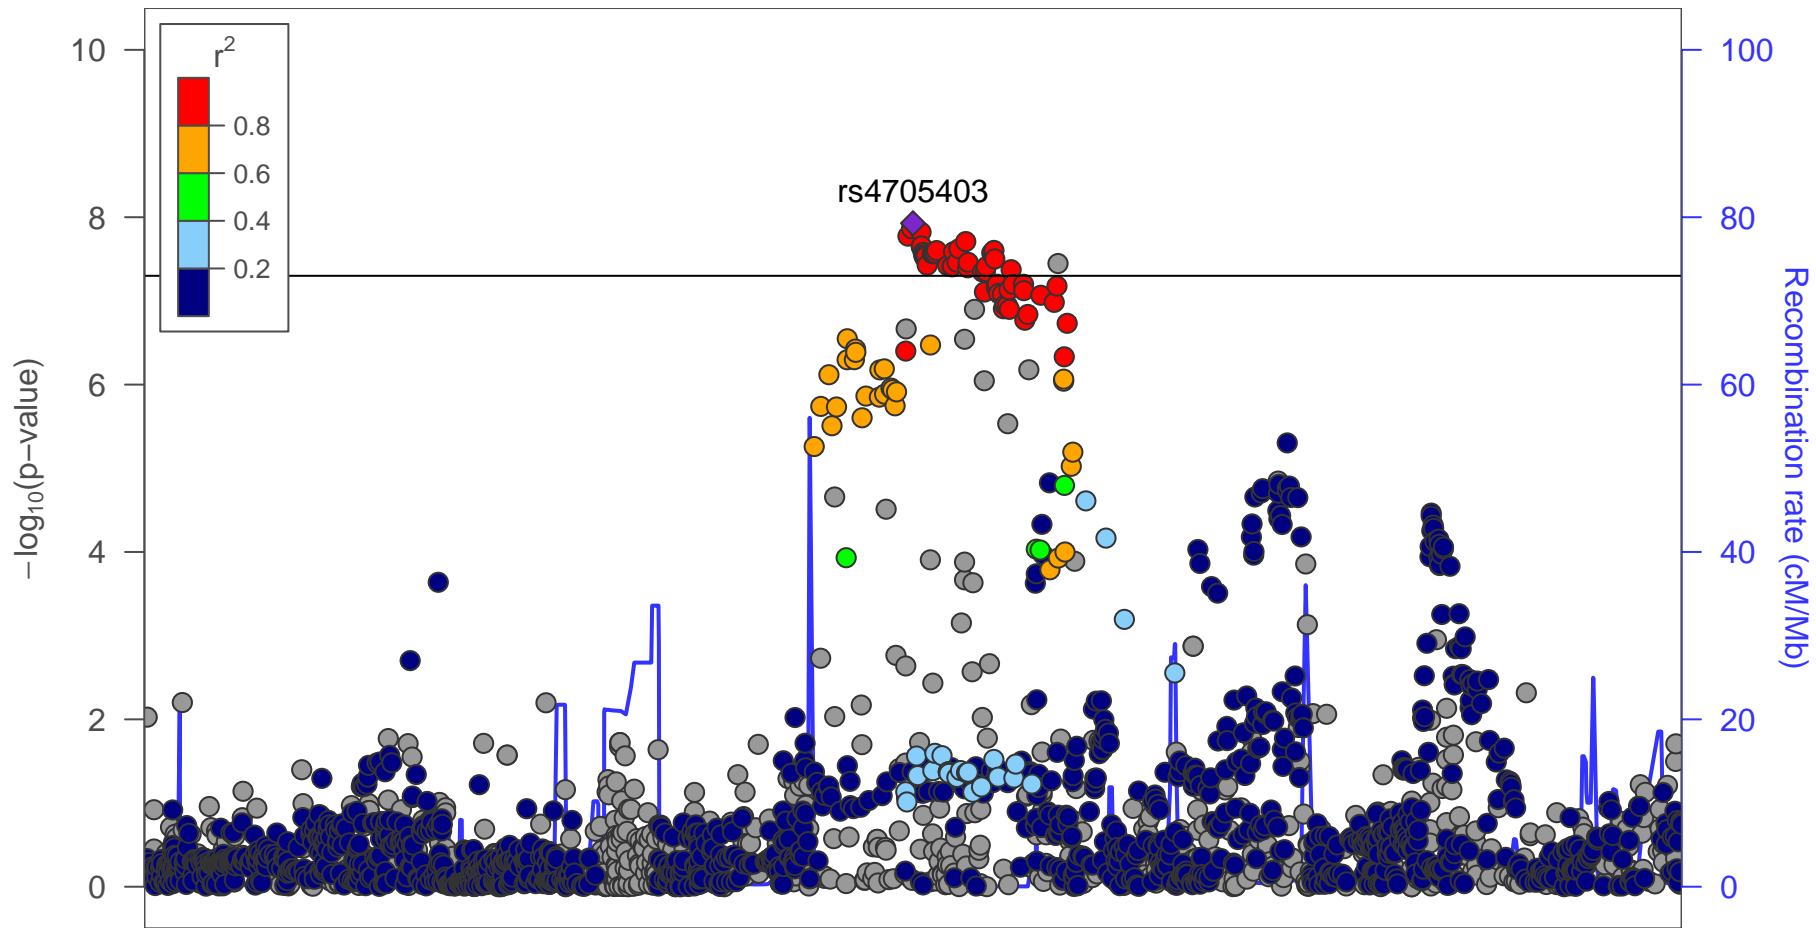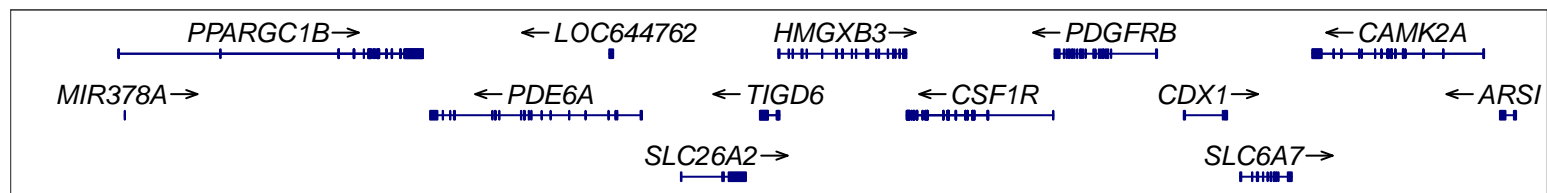

149.1      149.2      149.3      149.4      149.5      149.6

Position on chr5 (Mb)



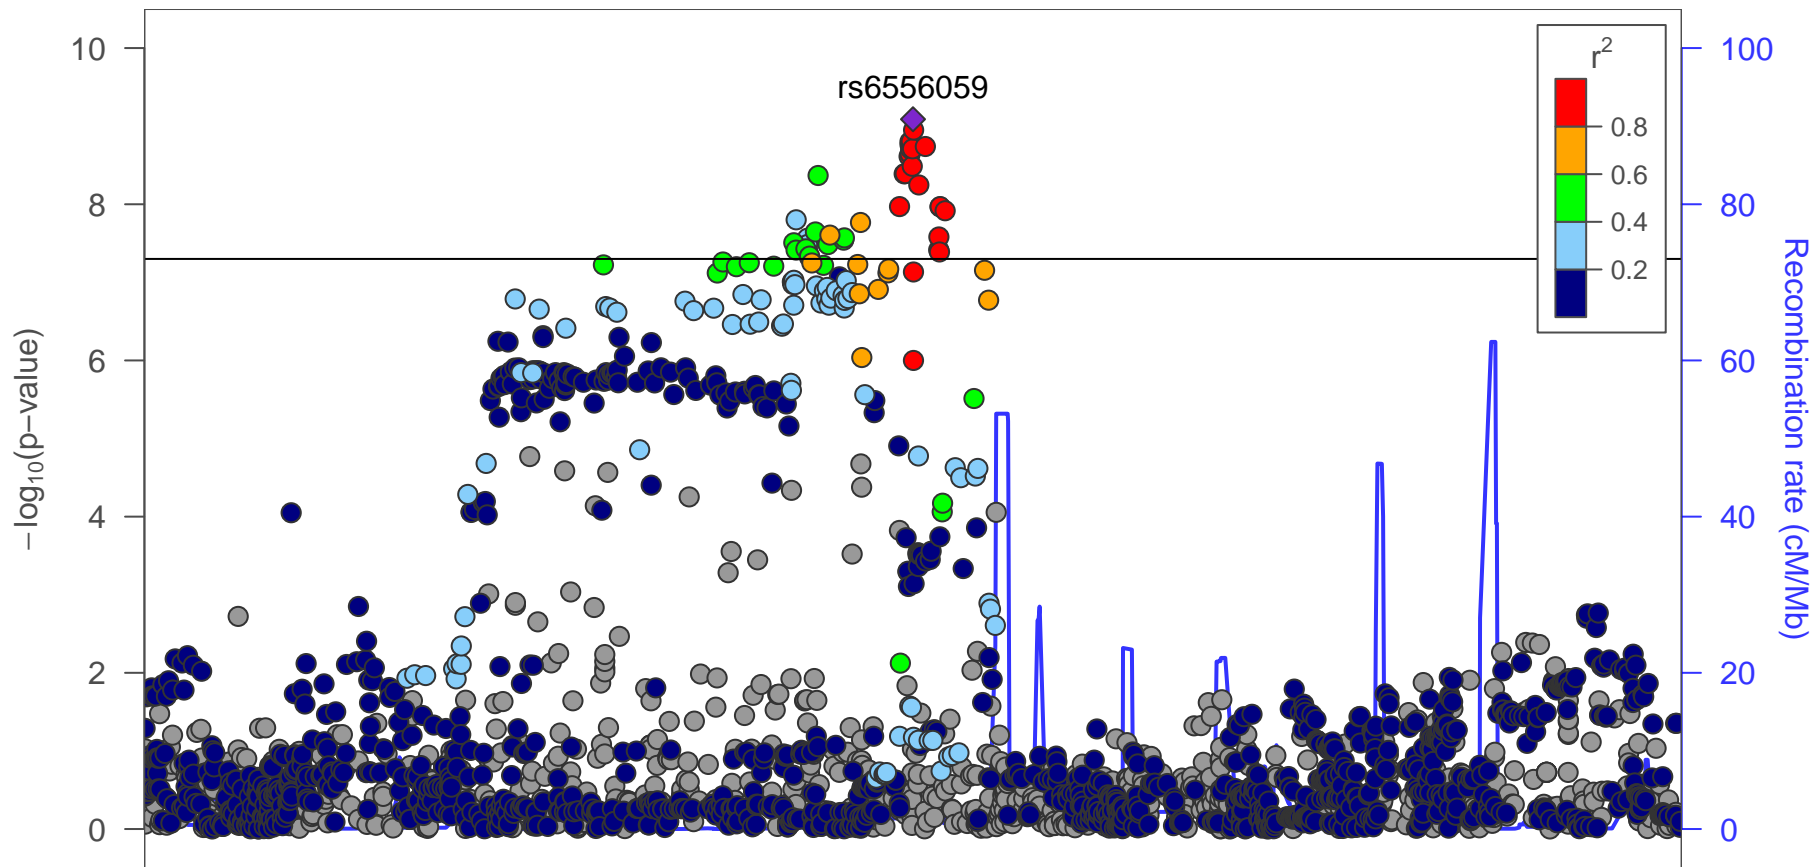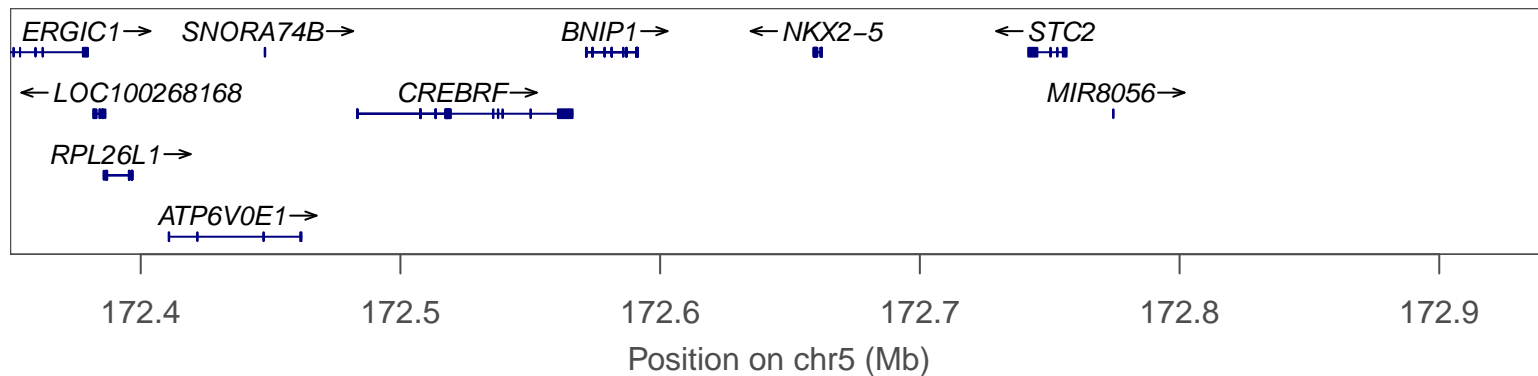

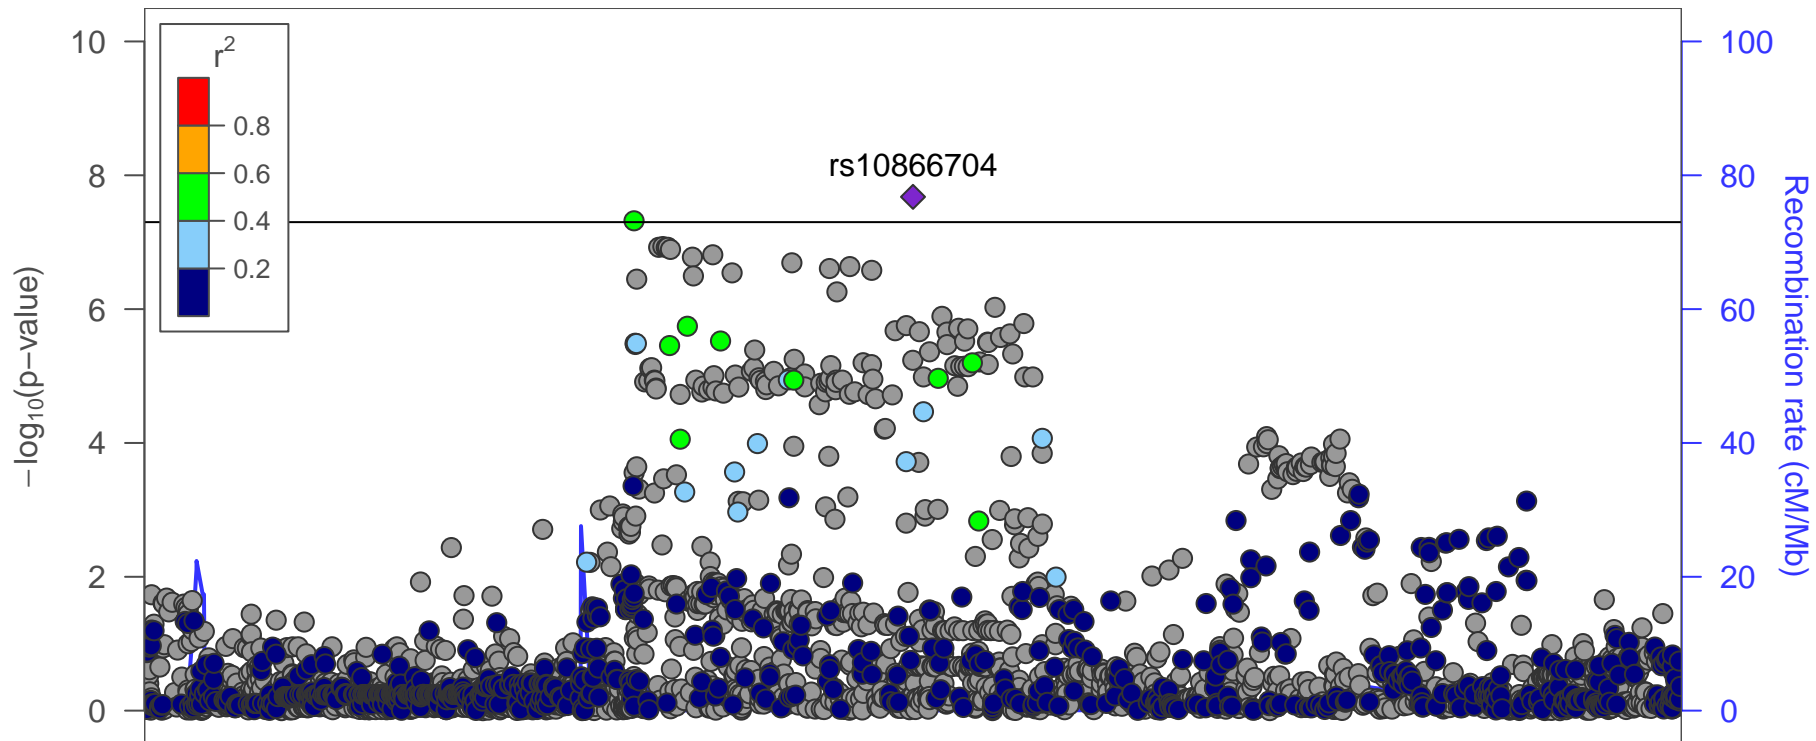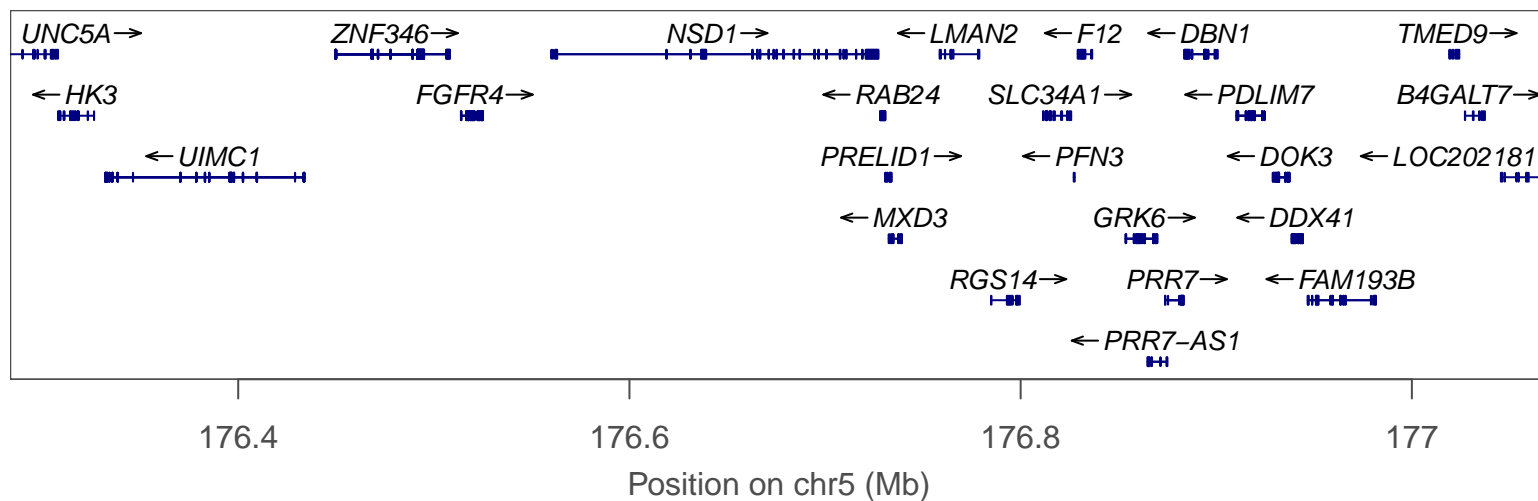

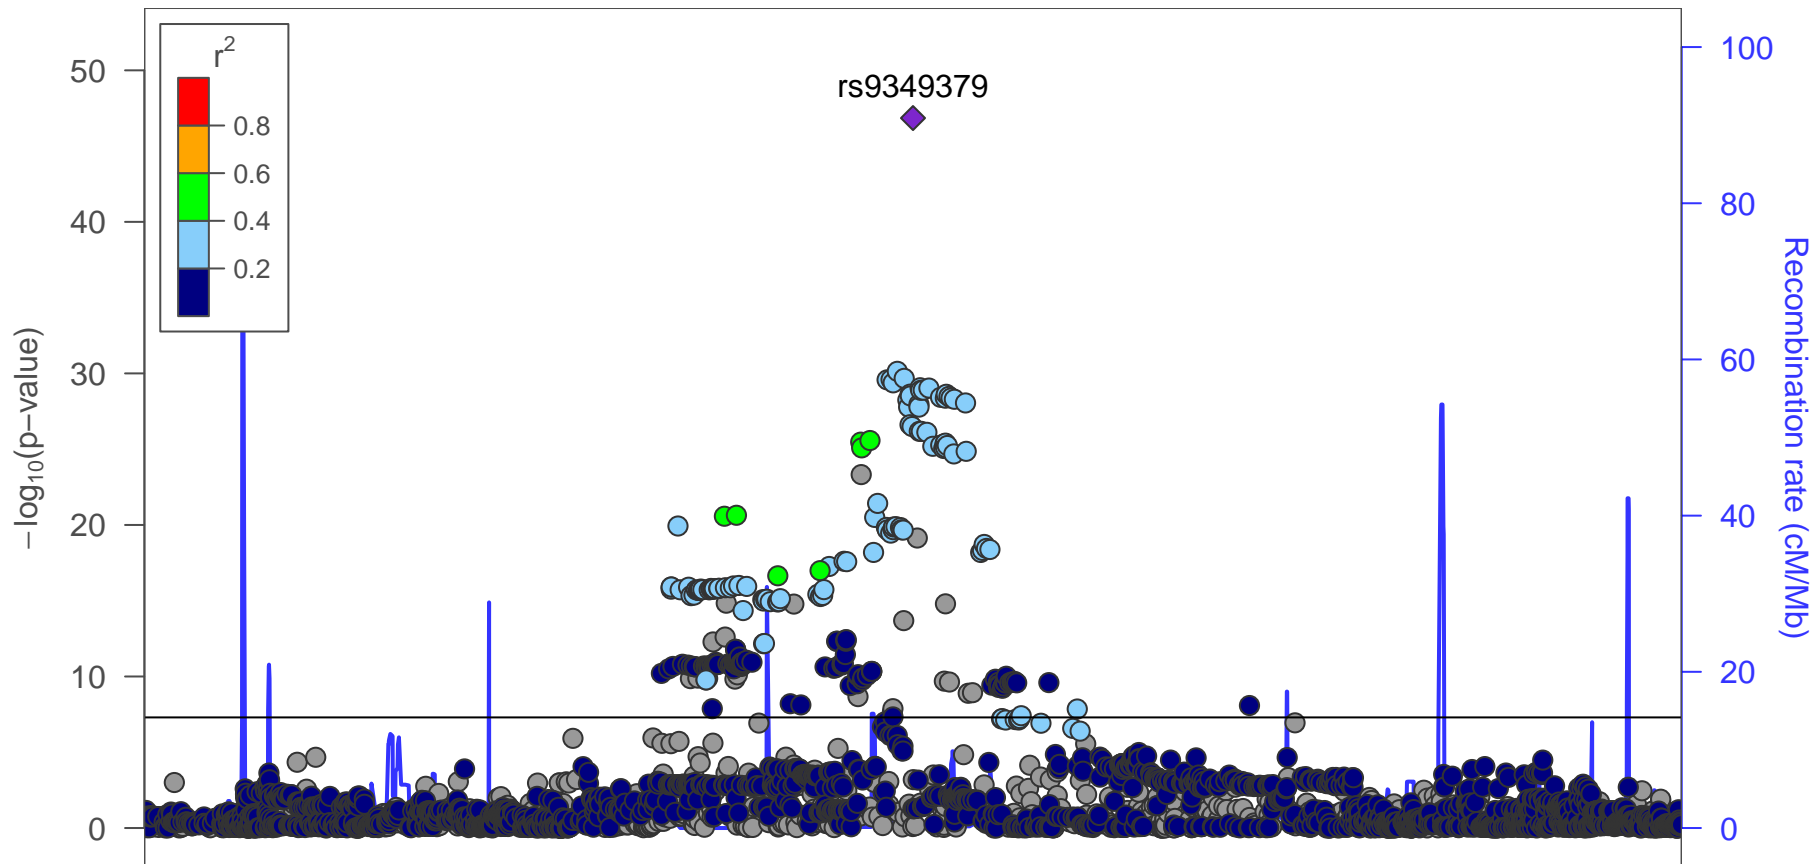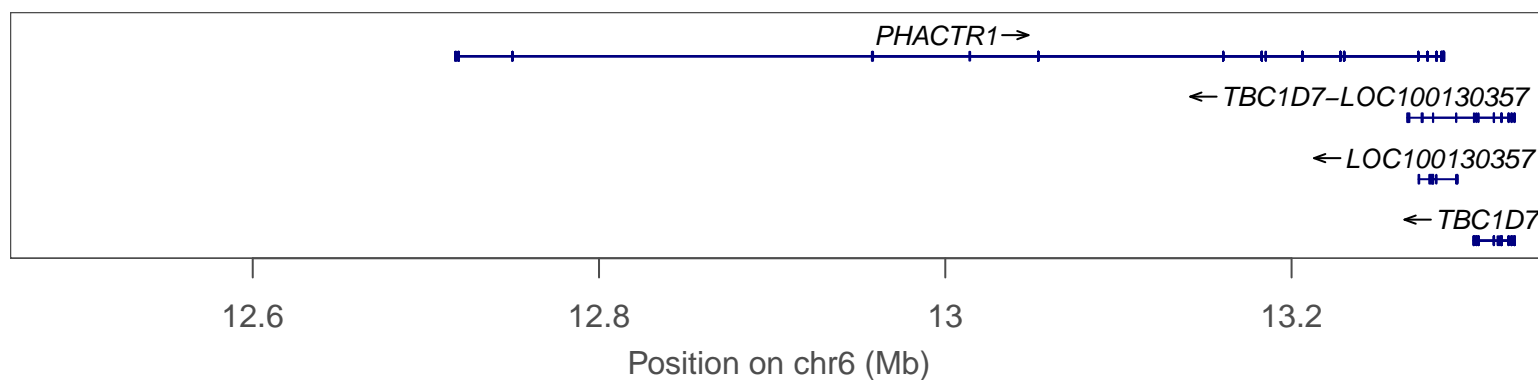

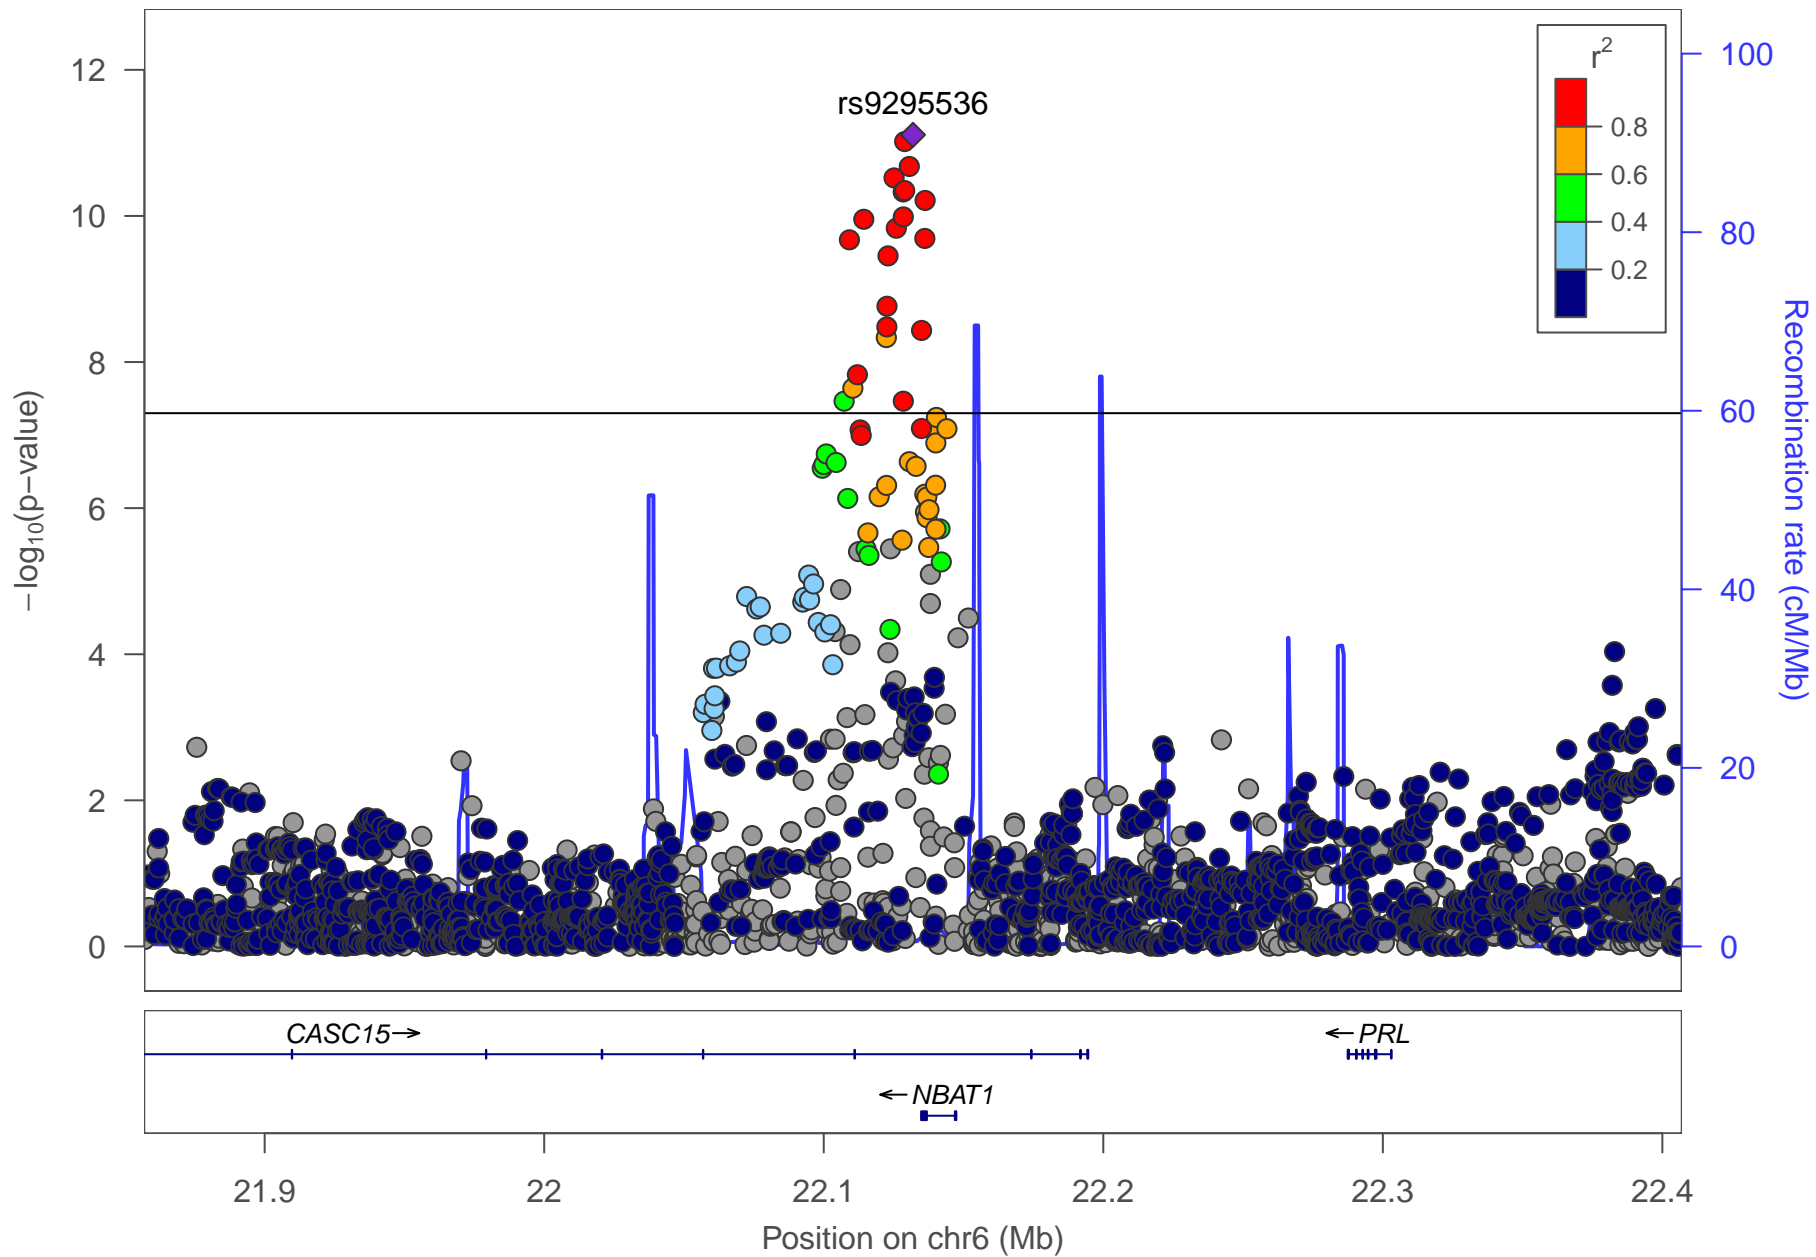

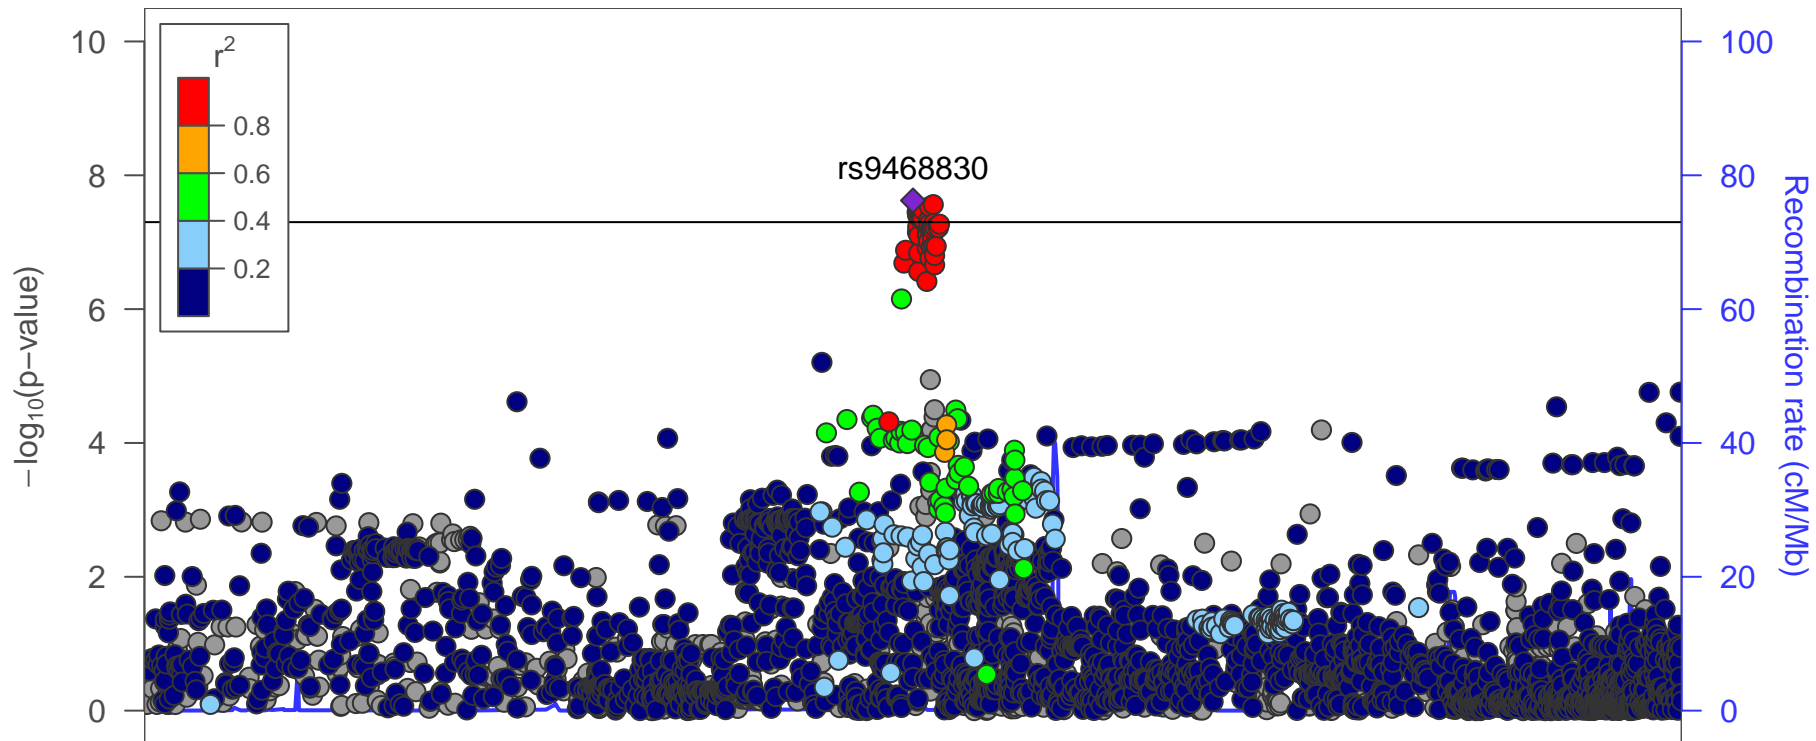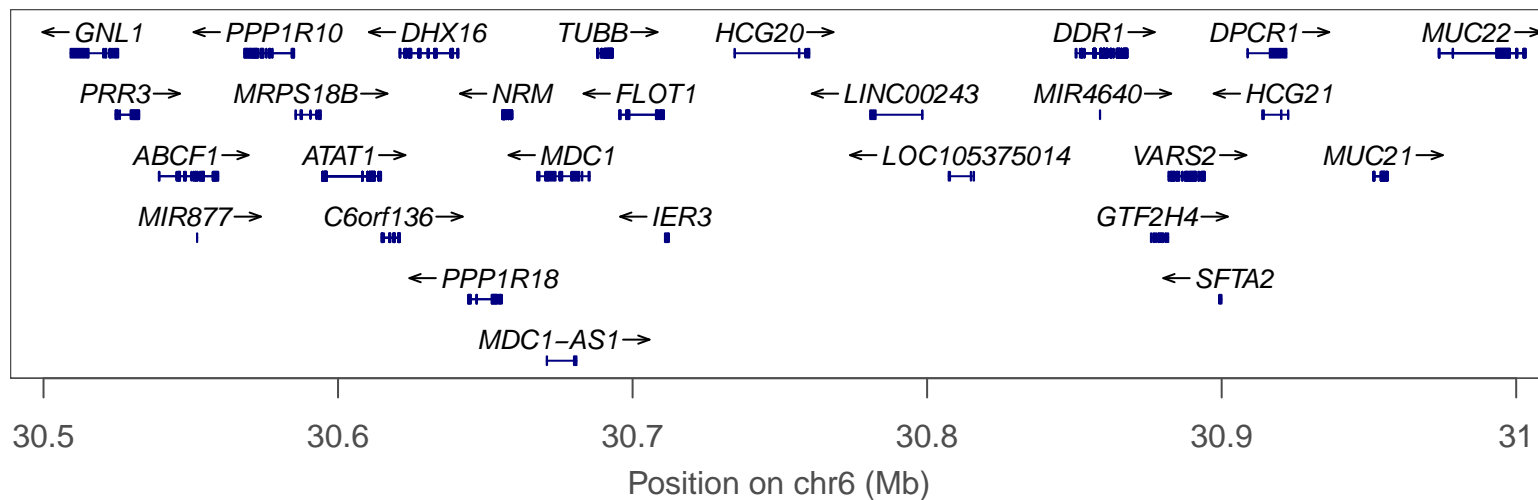

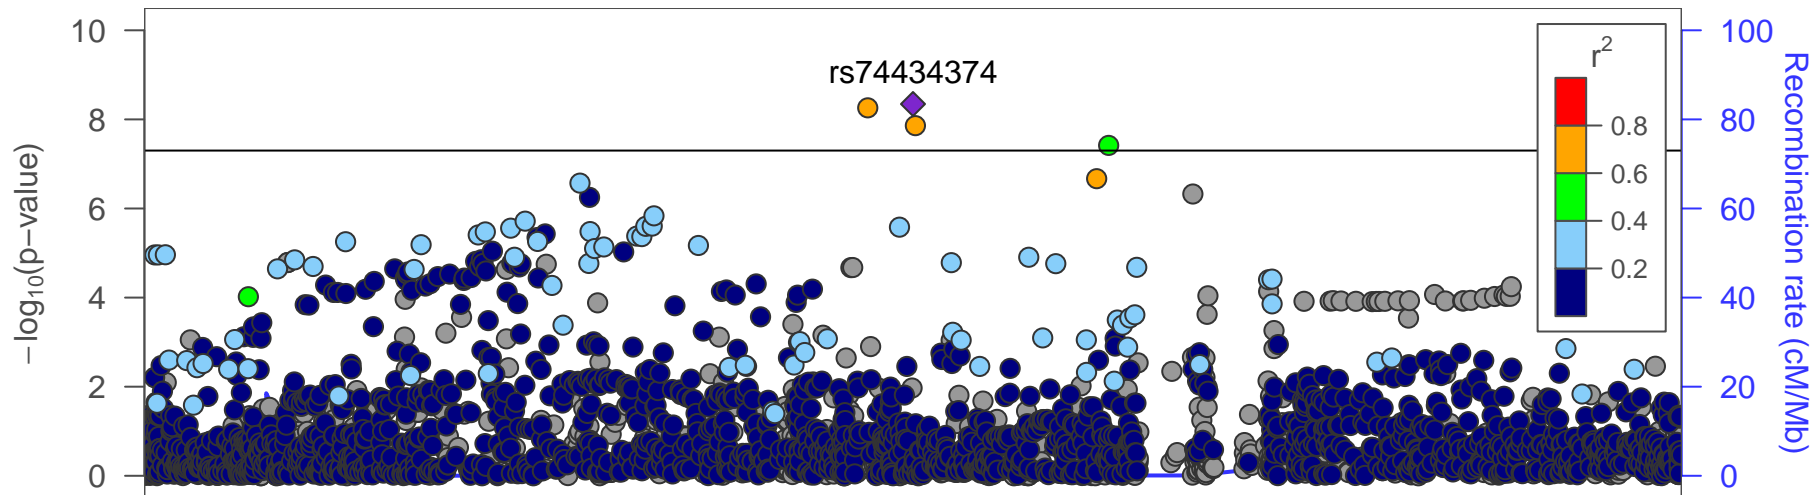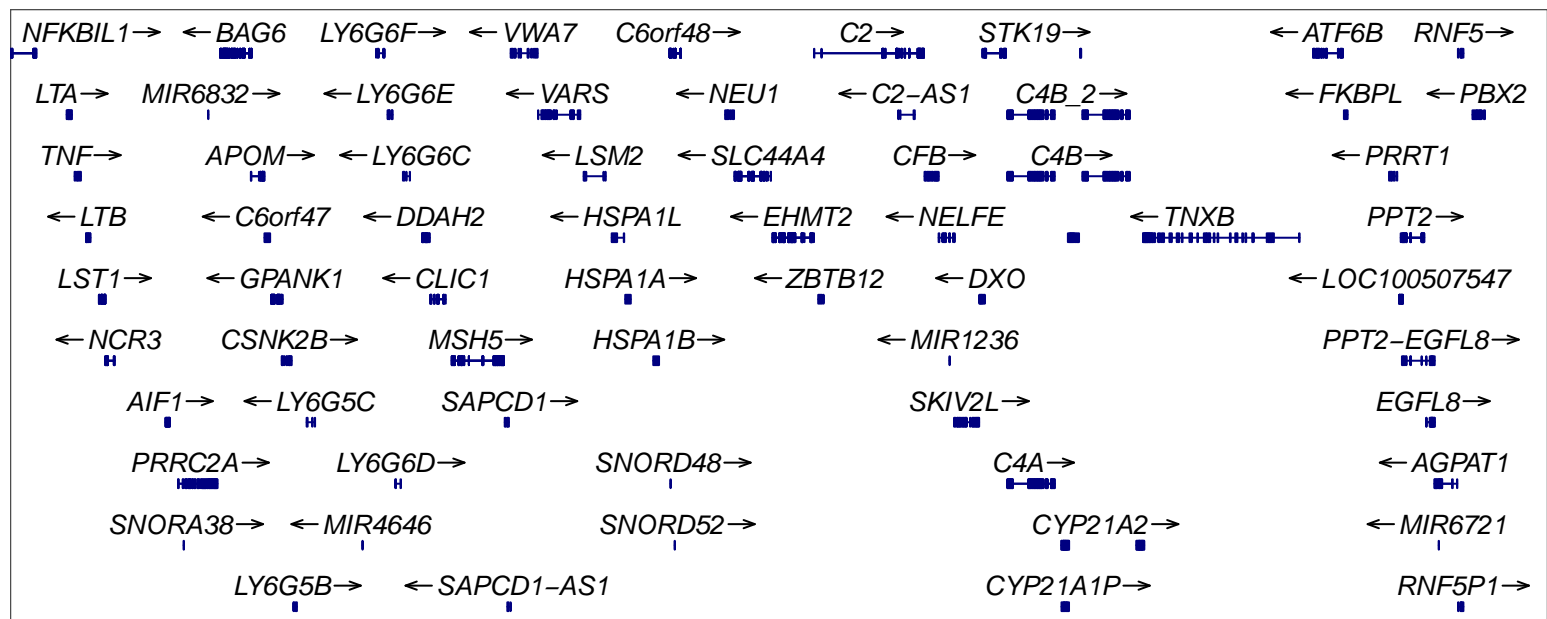

8 genes omitted

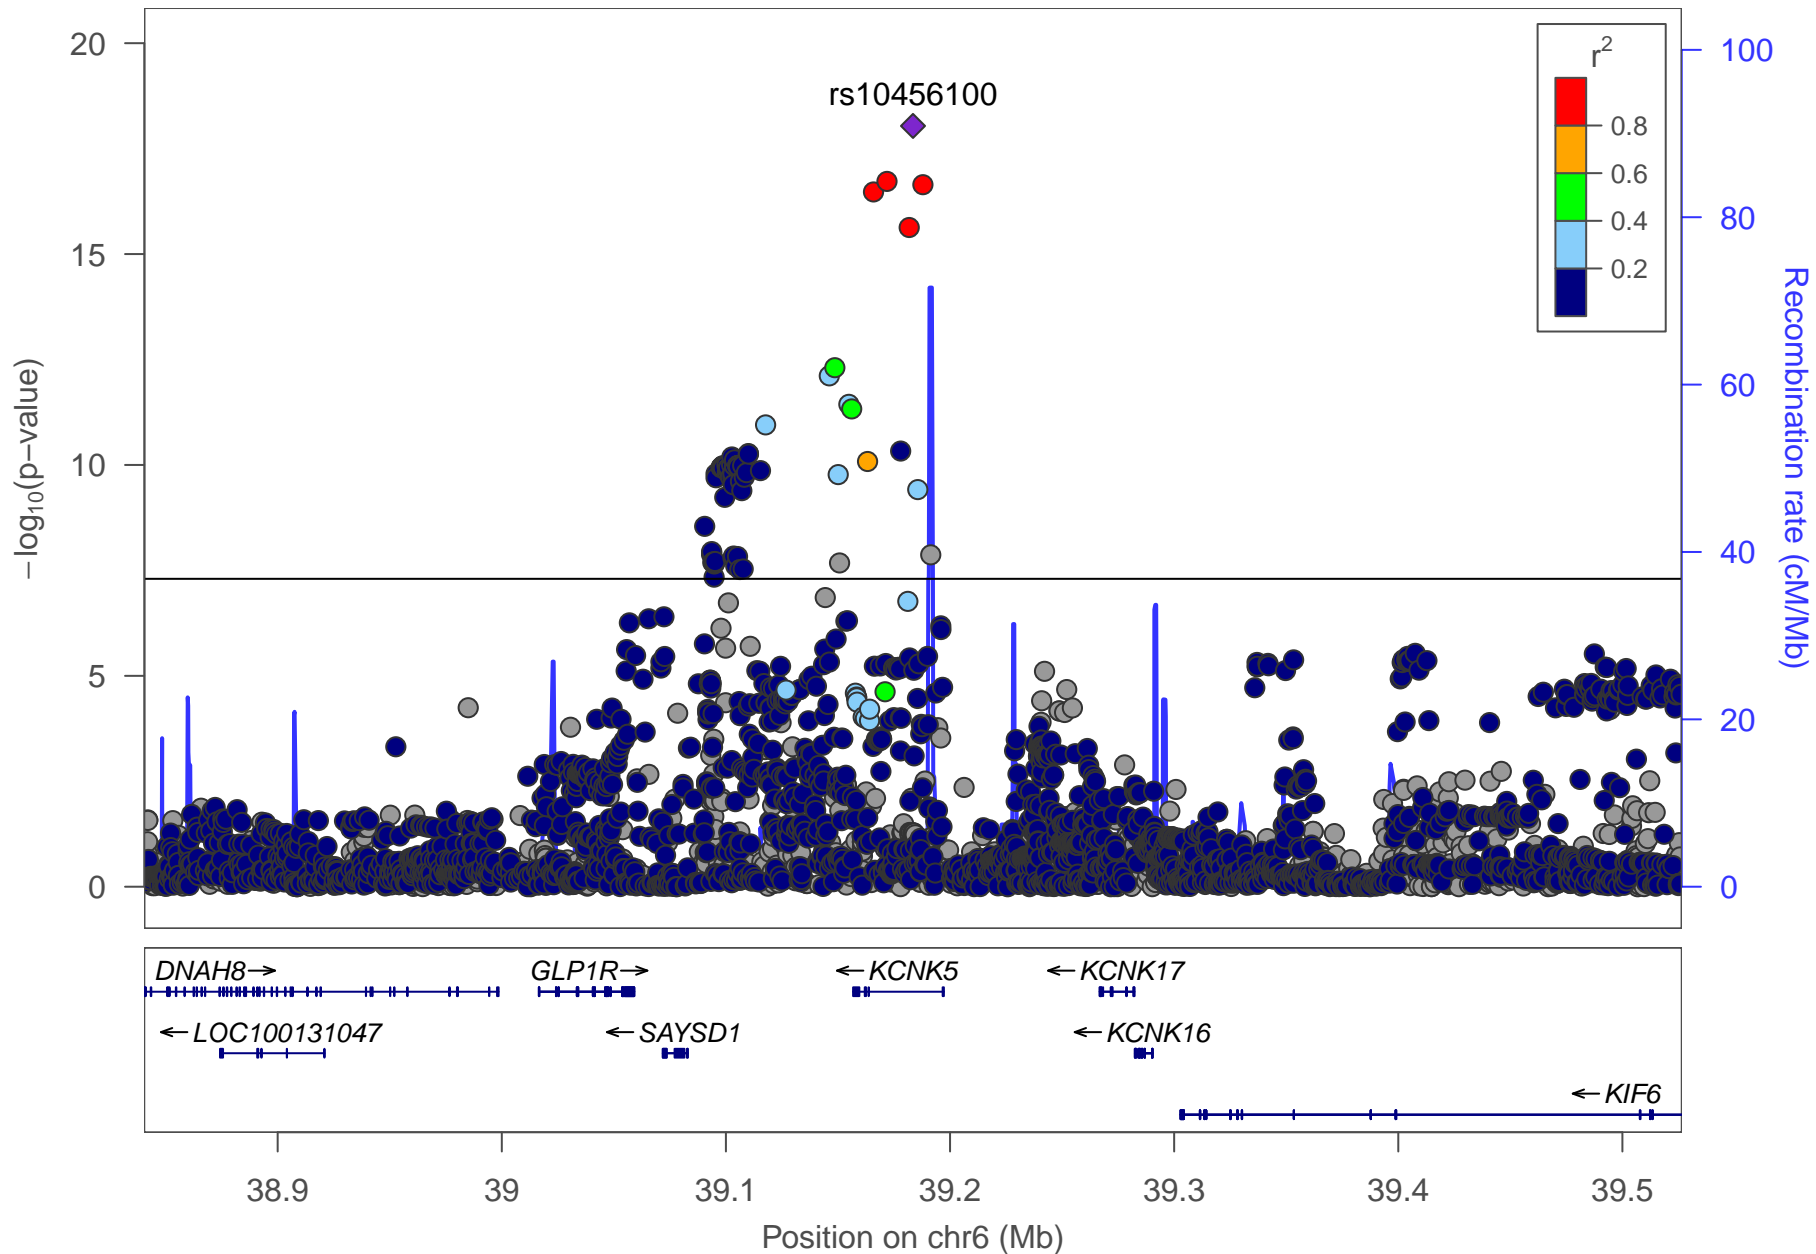

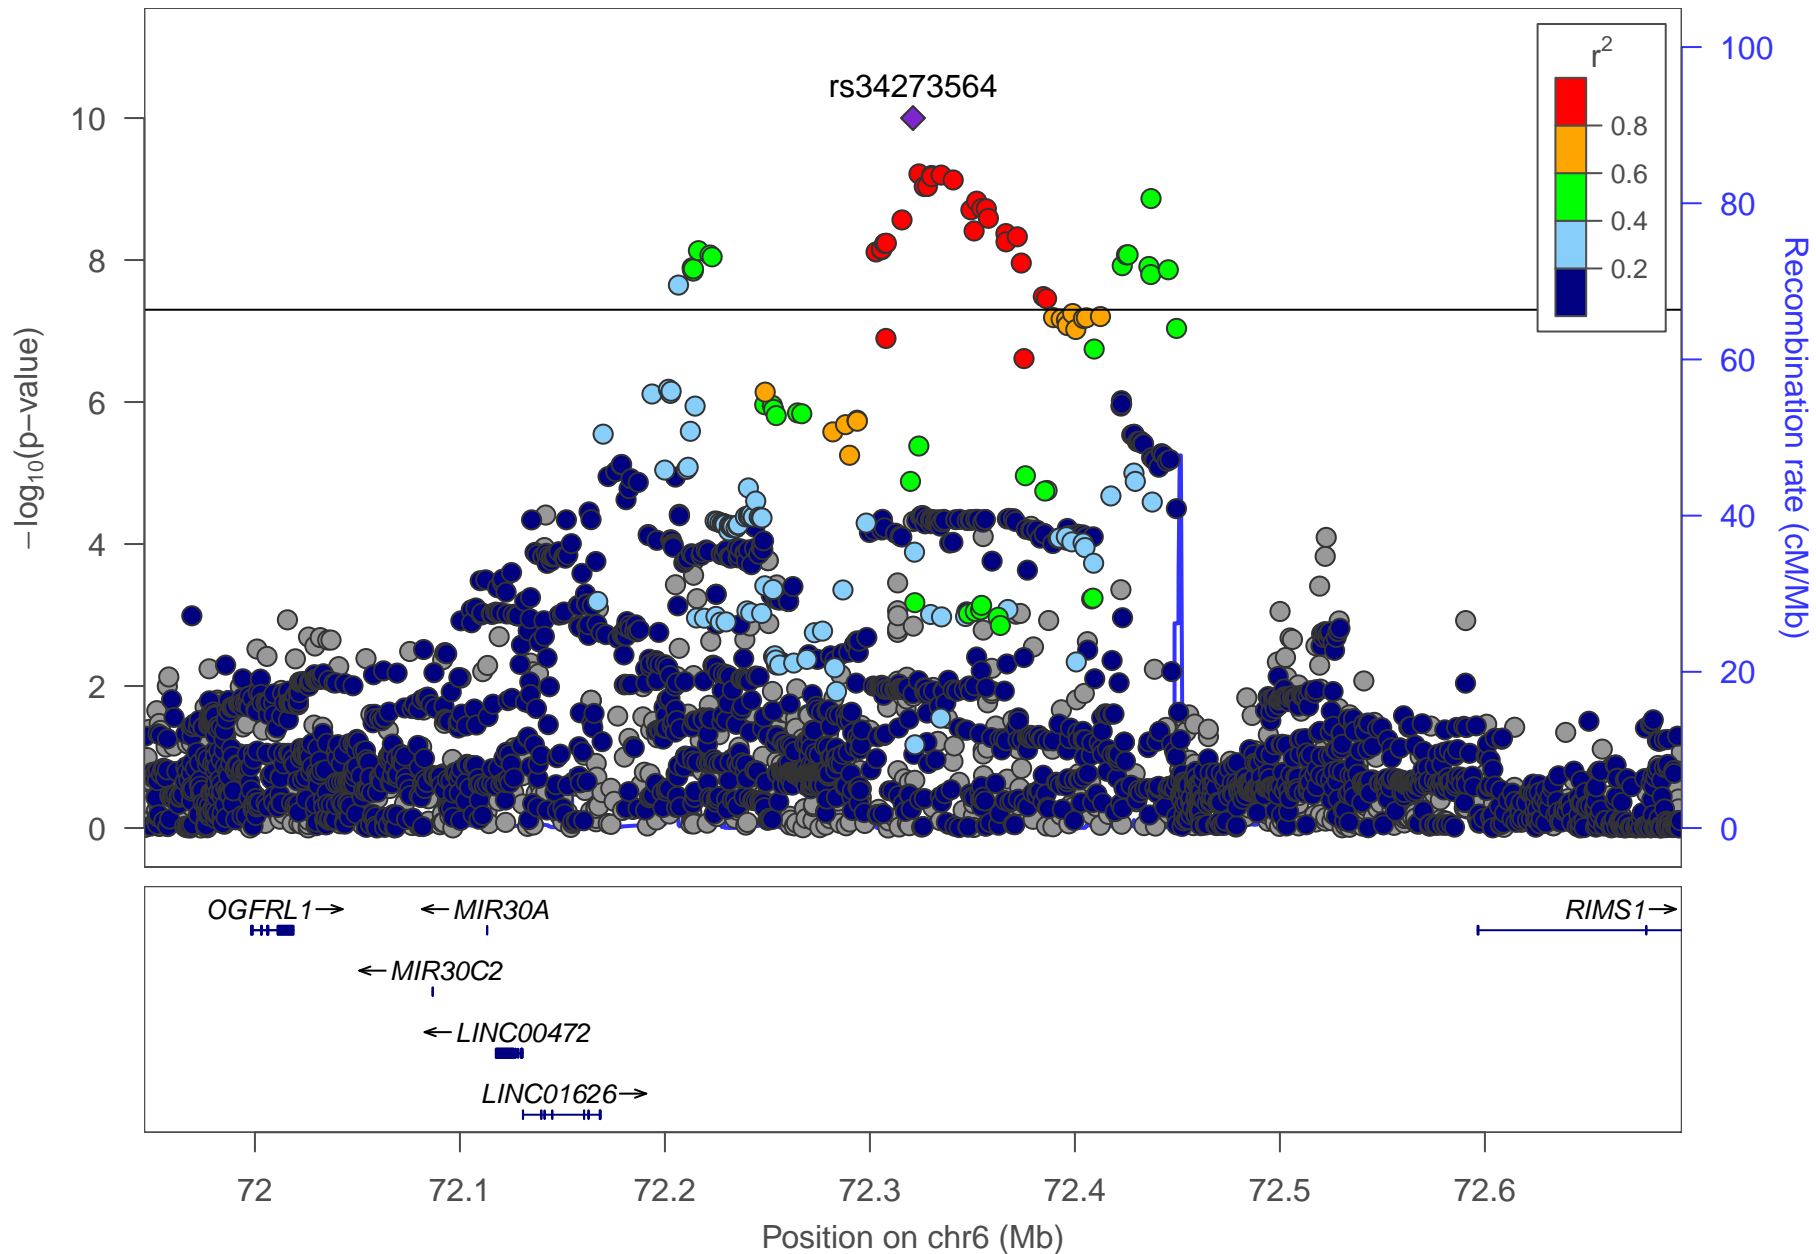



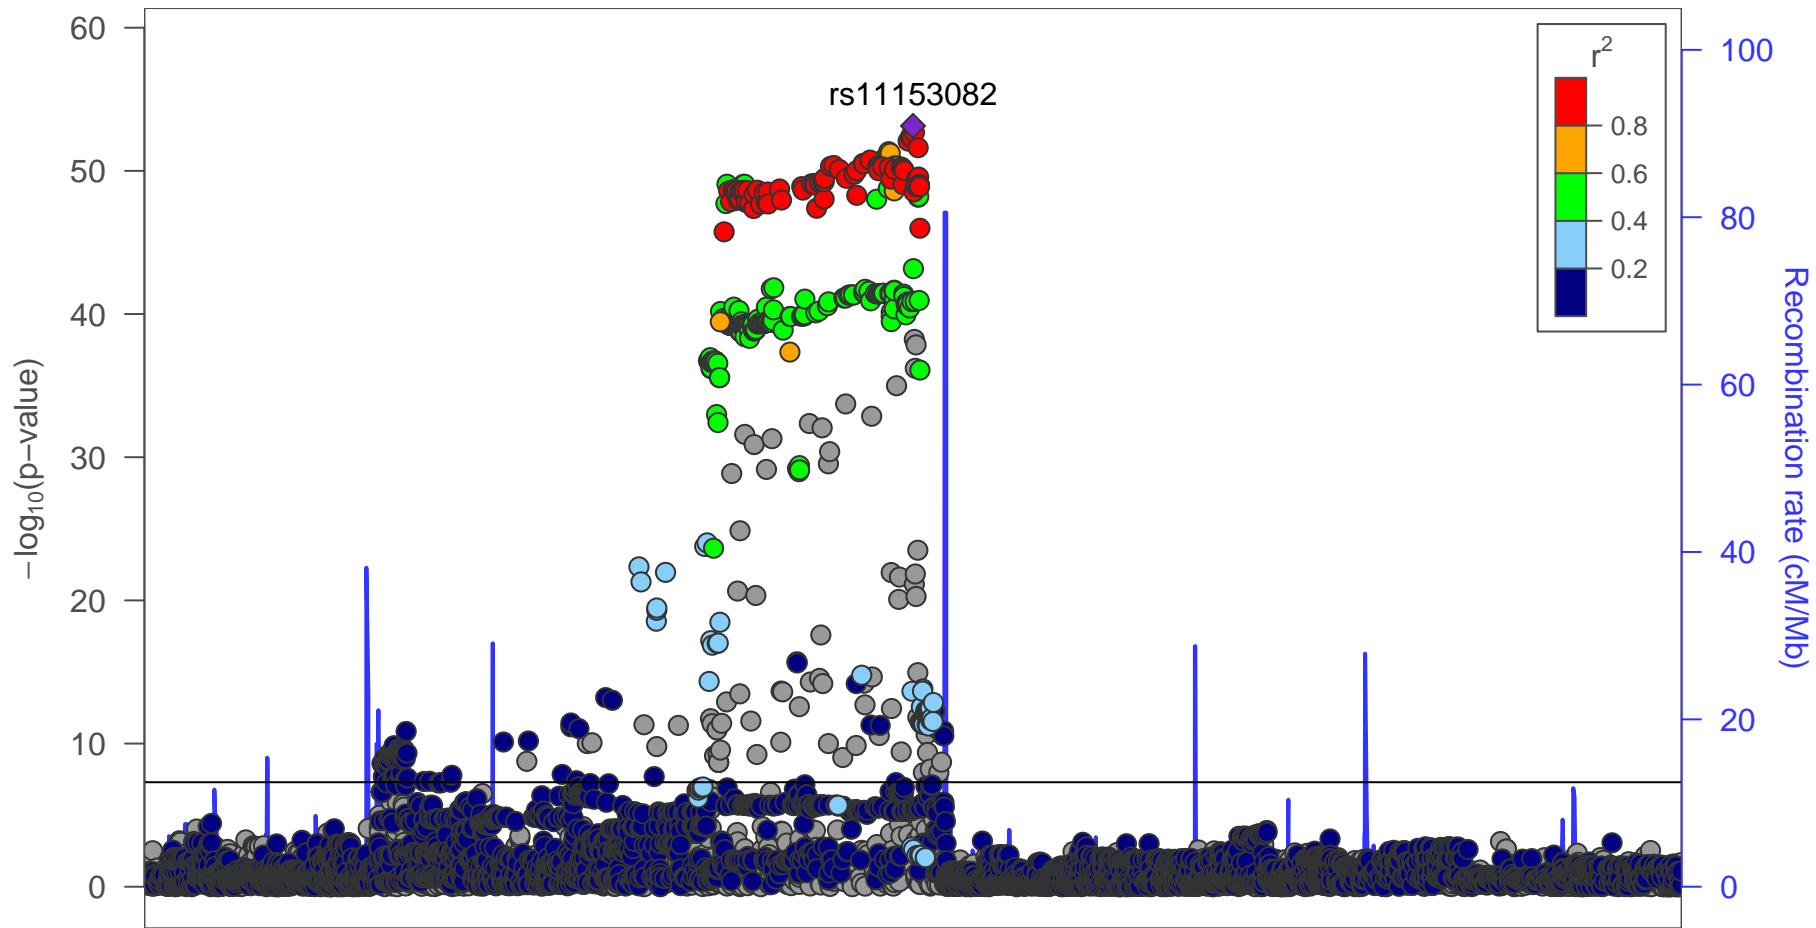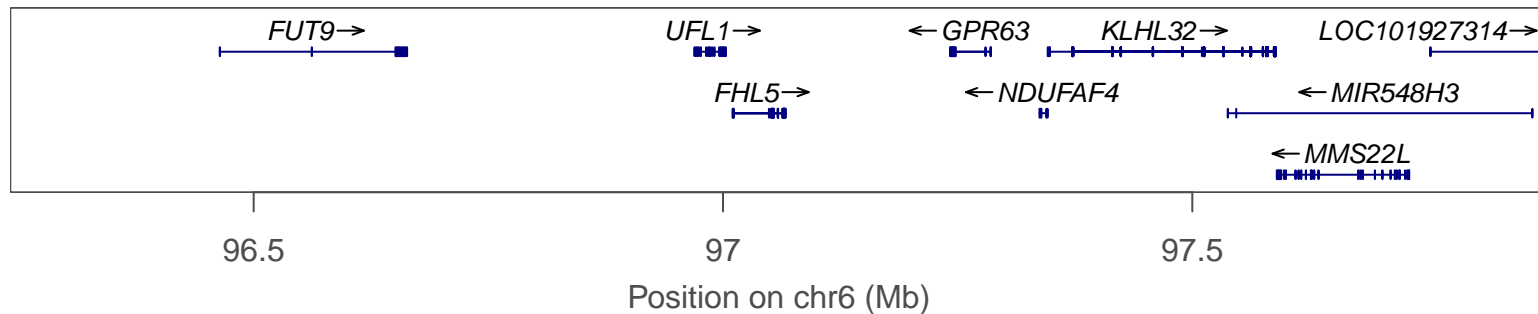

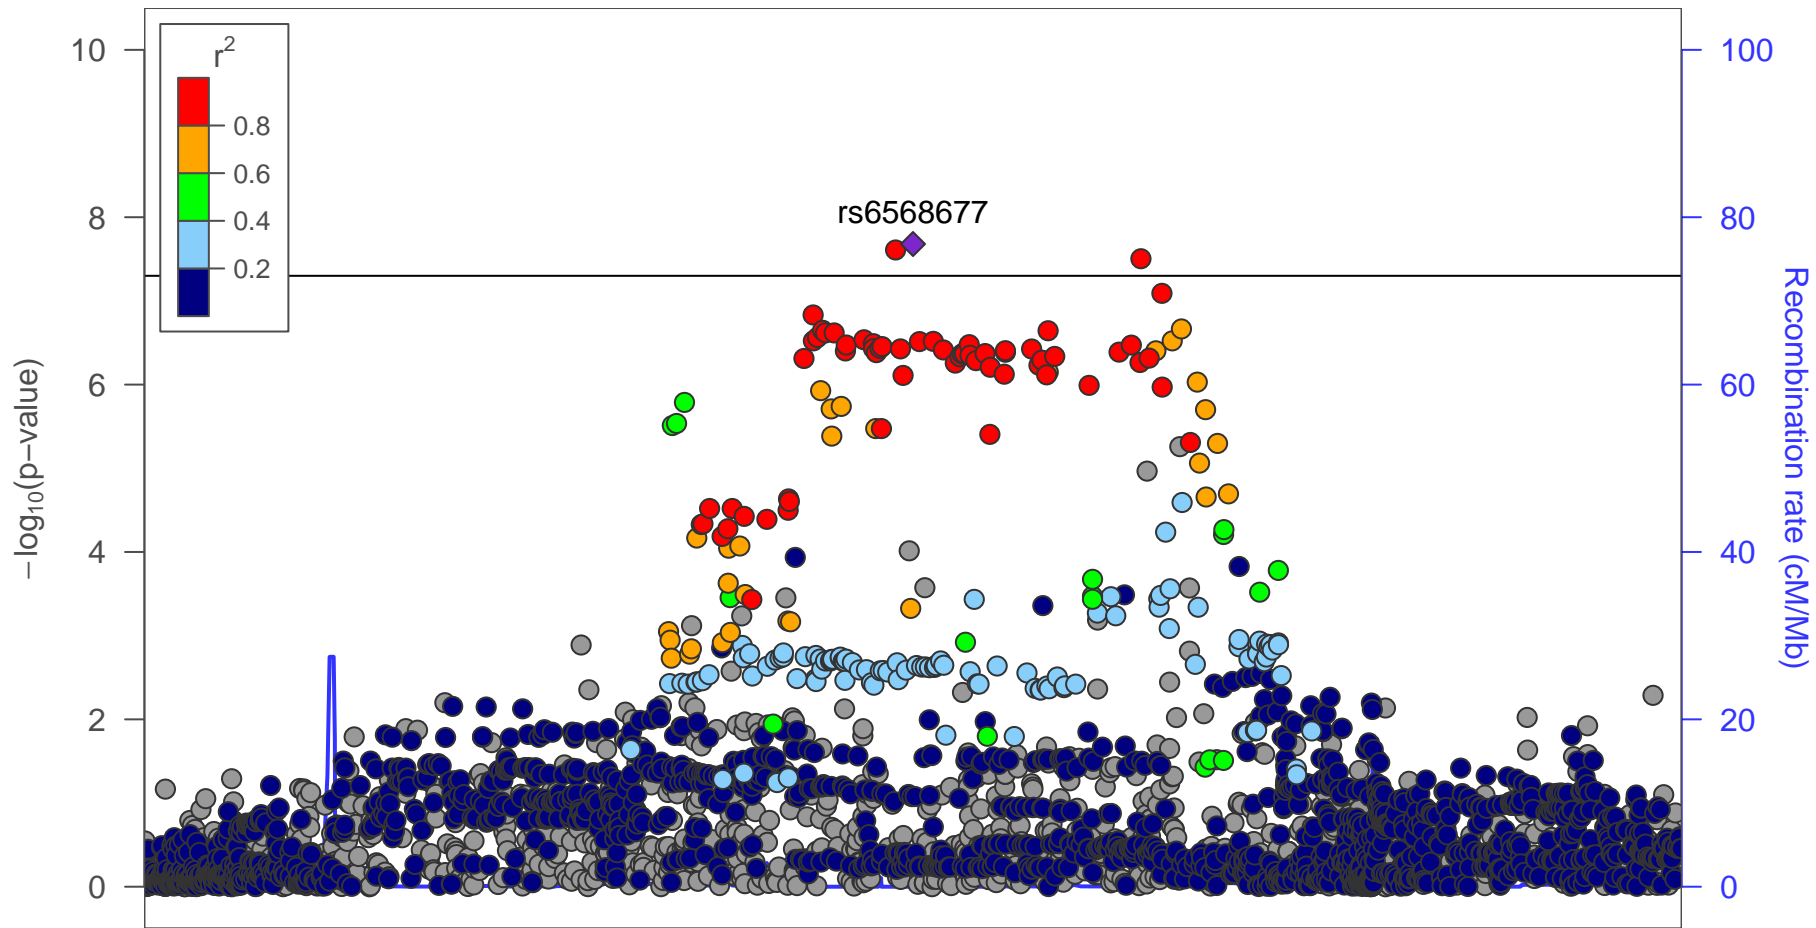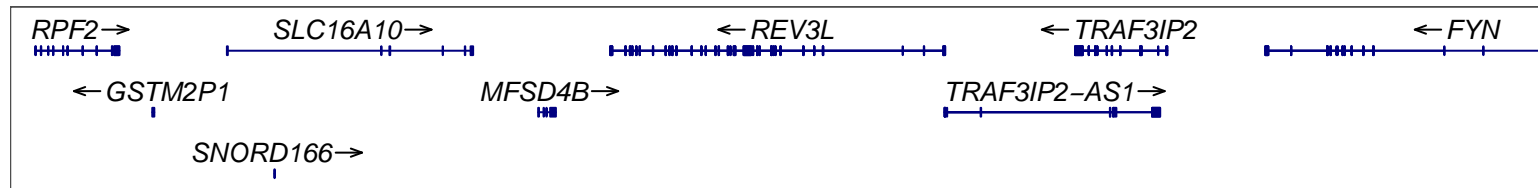

111.4

111.6

111.8

112

Position on chr6 (Mb)

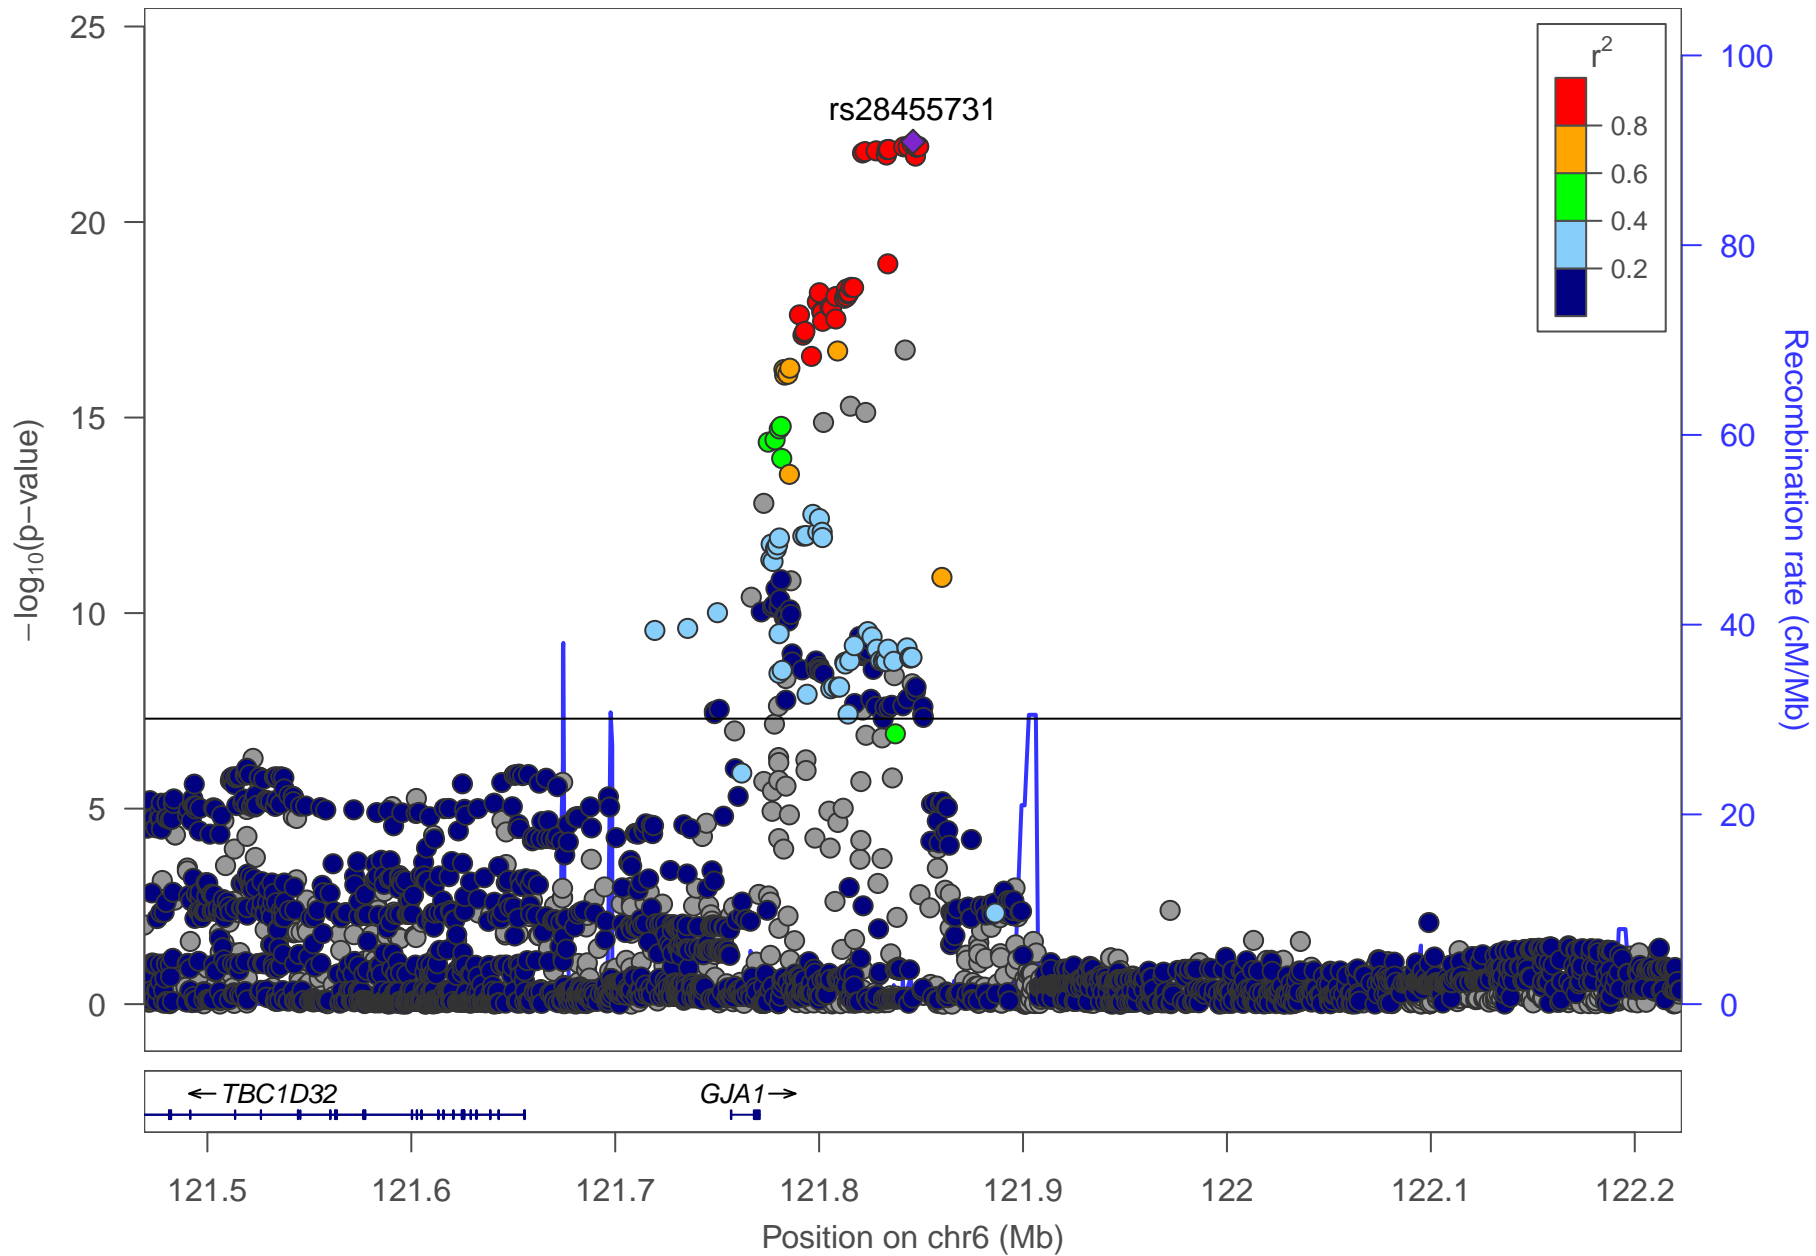

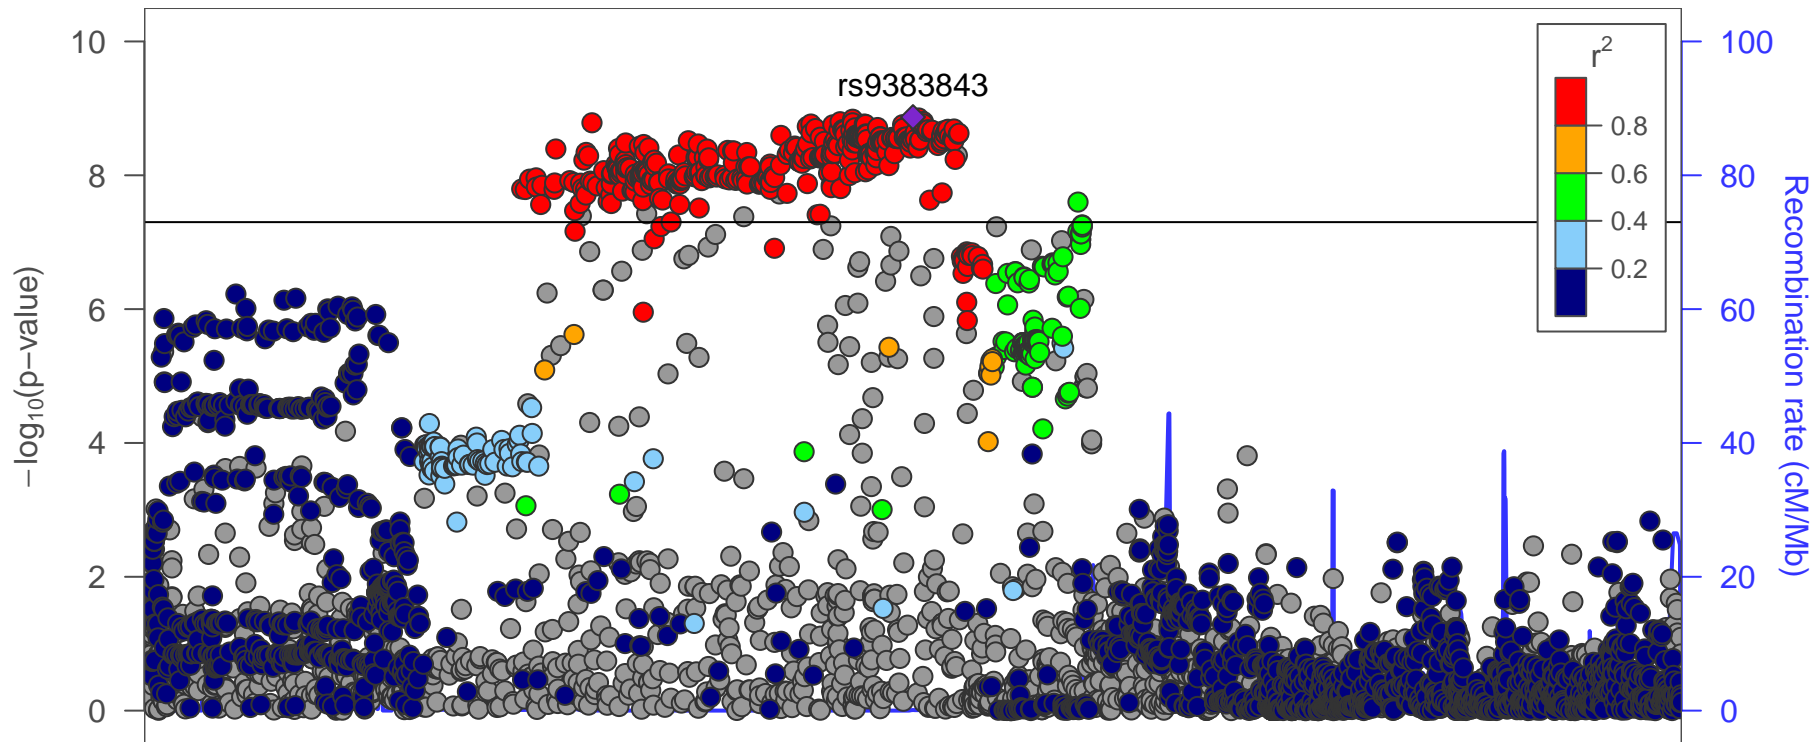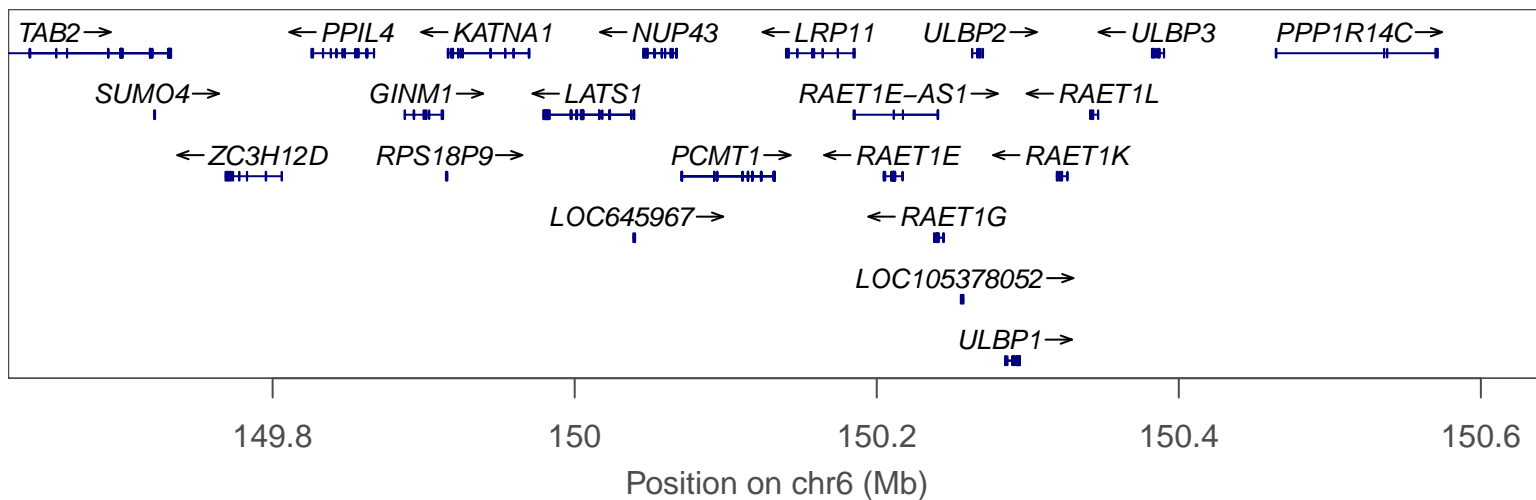

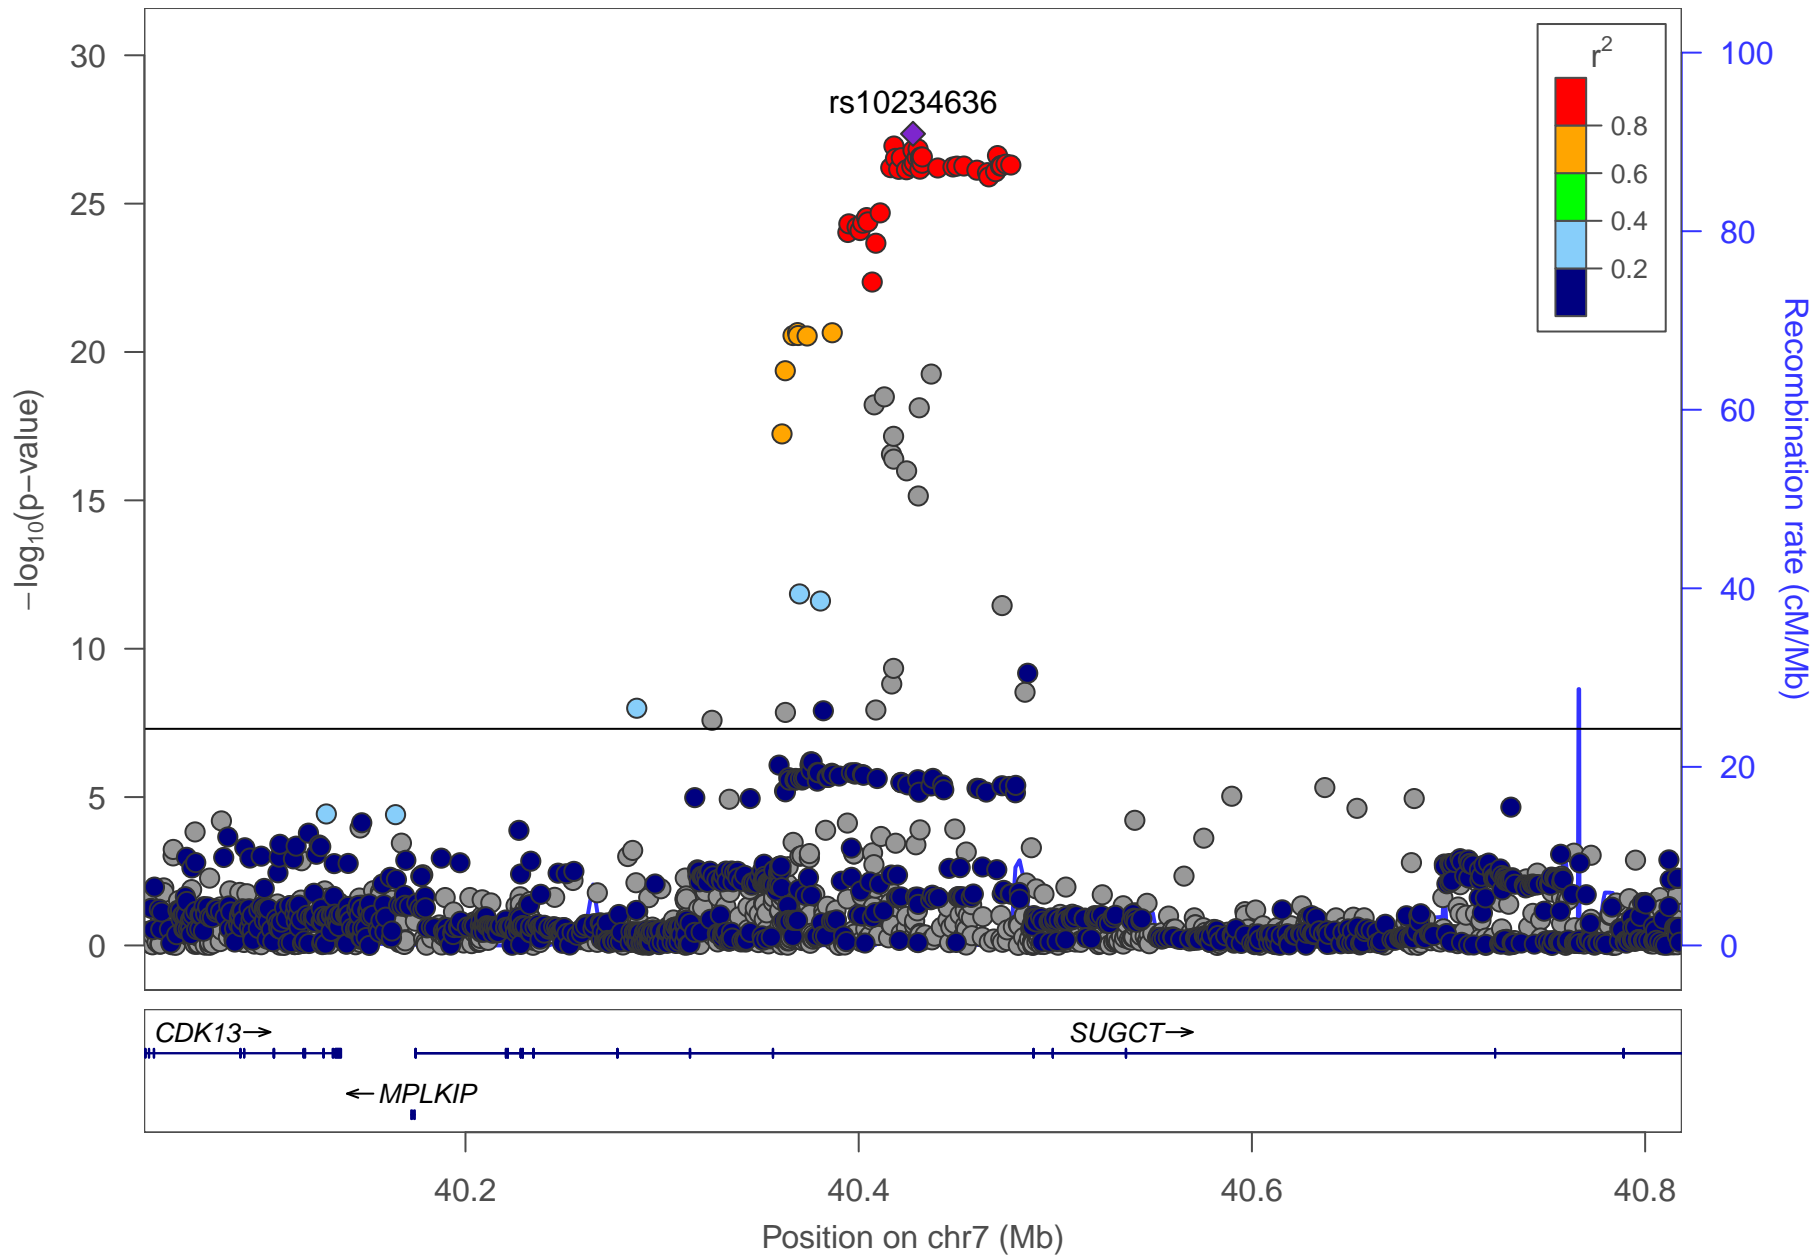

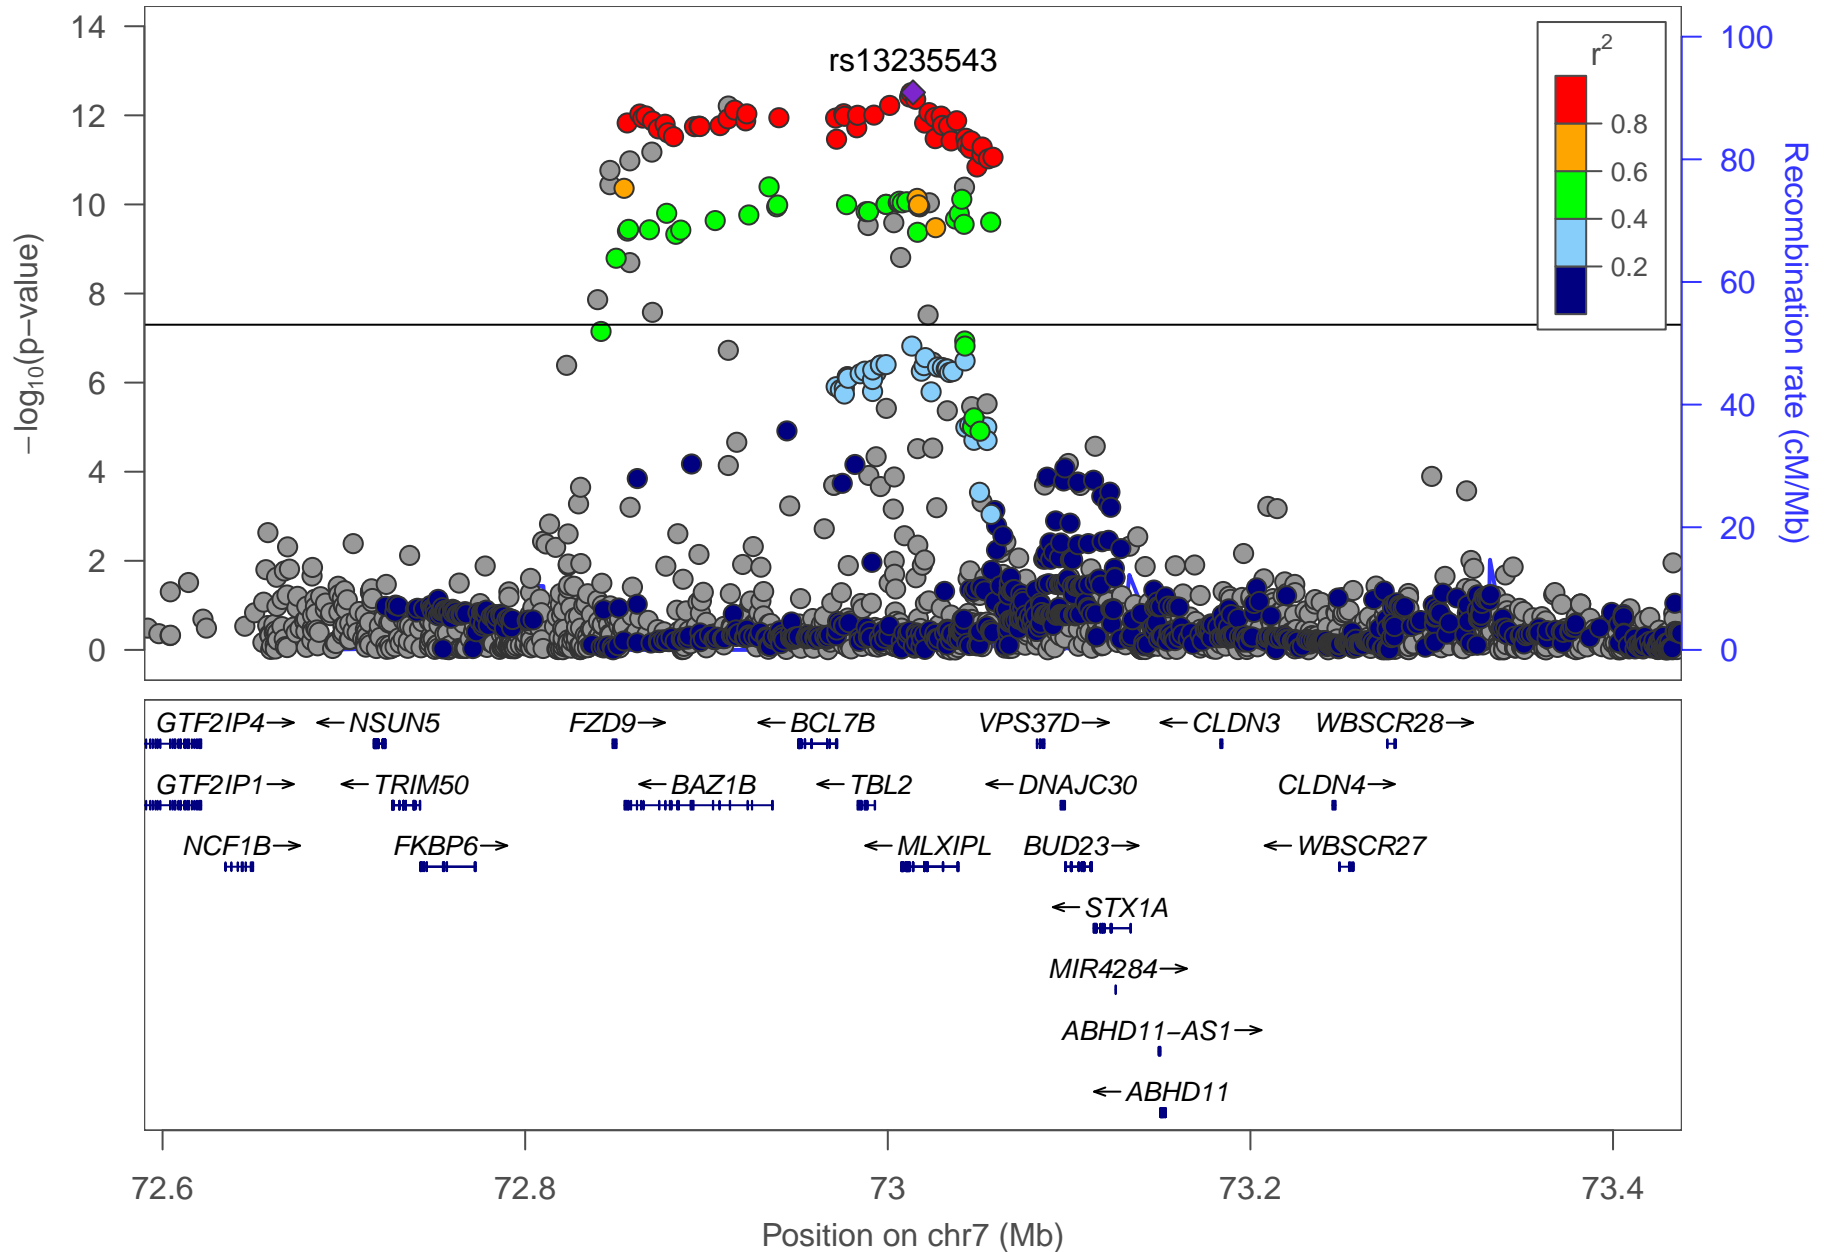

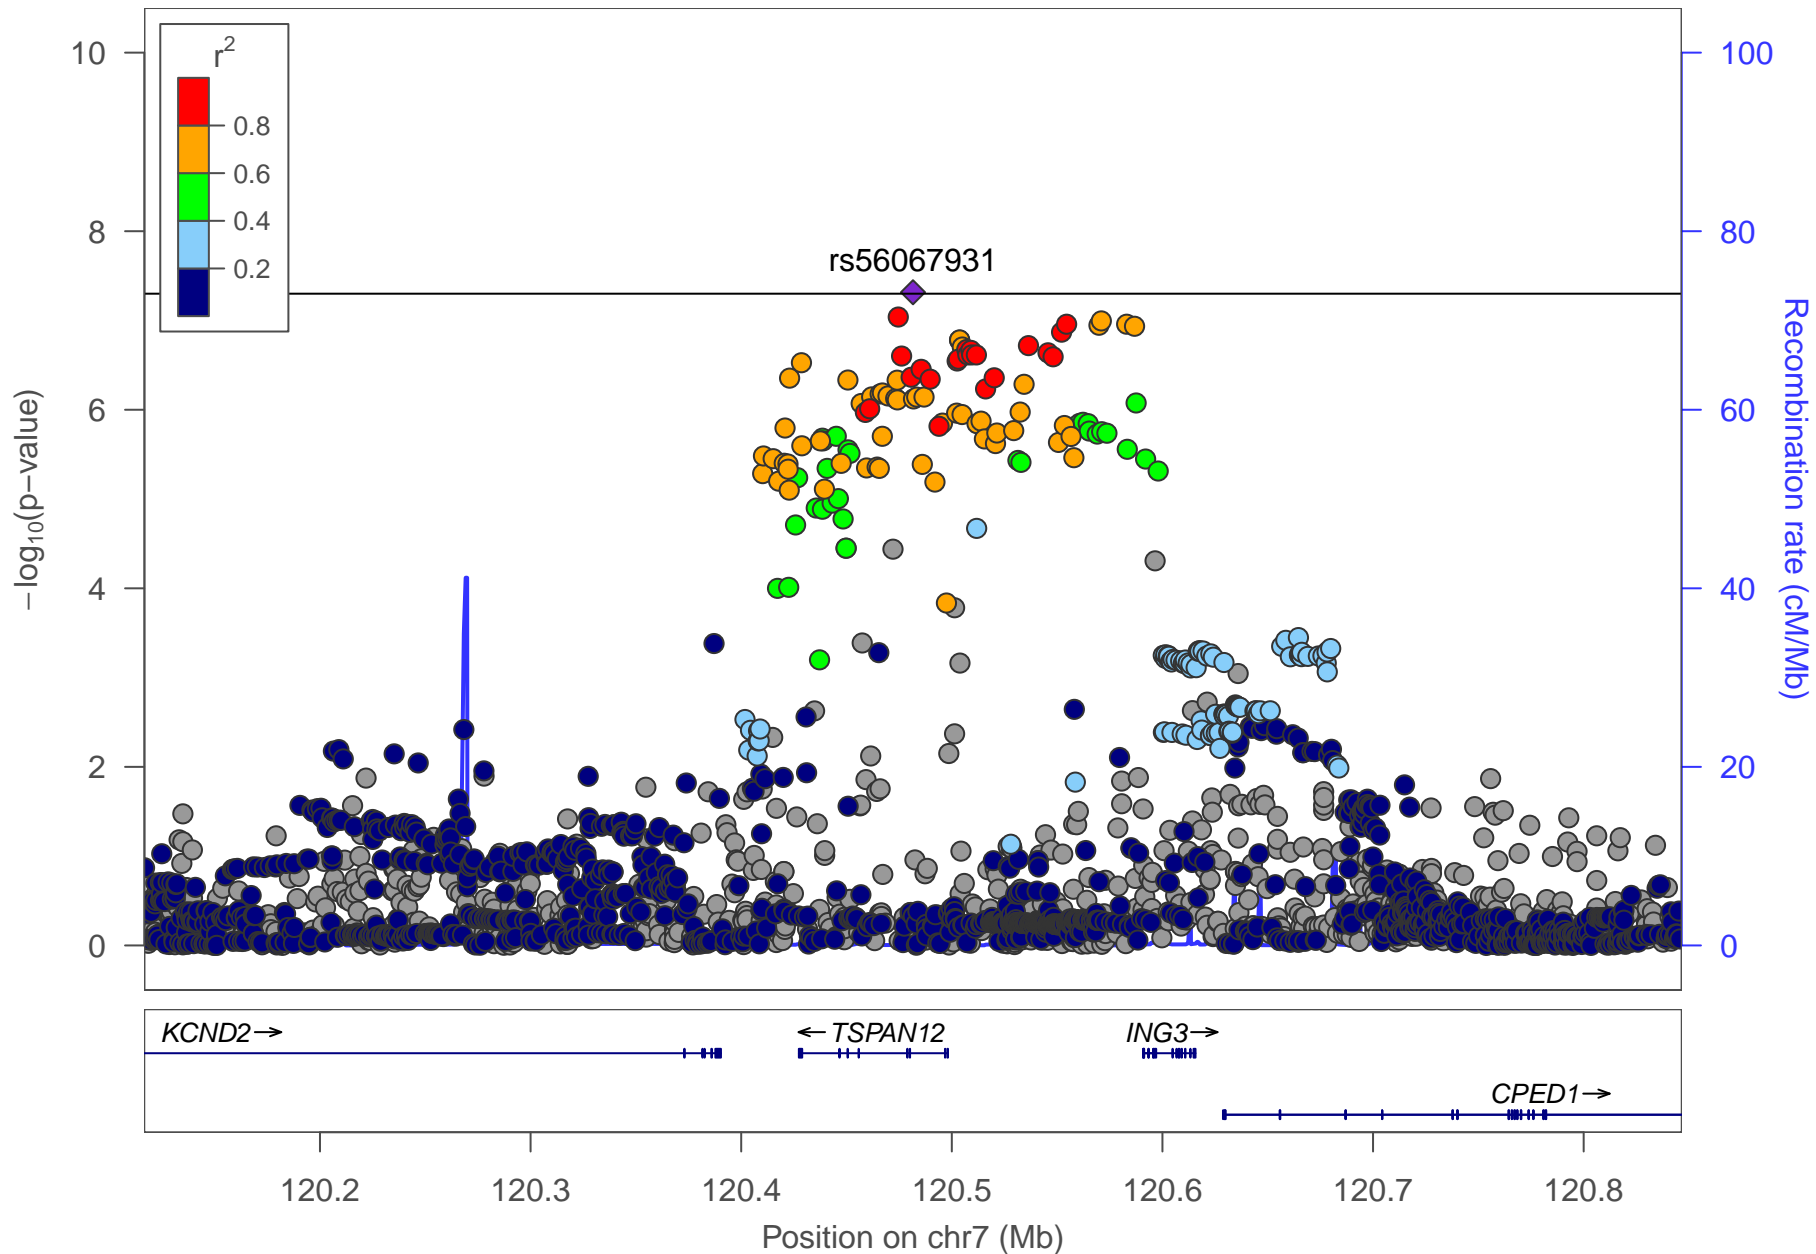

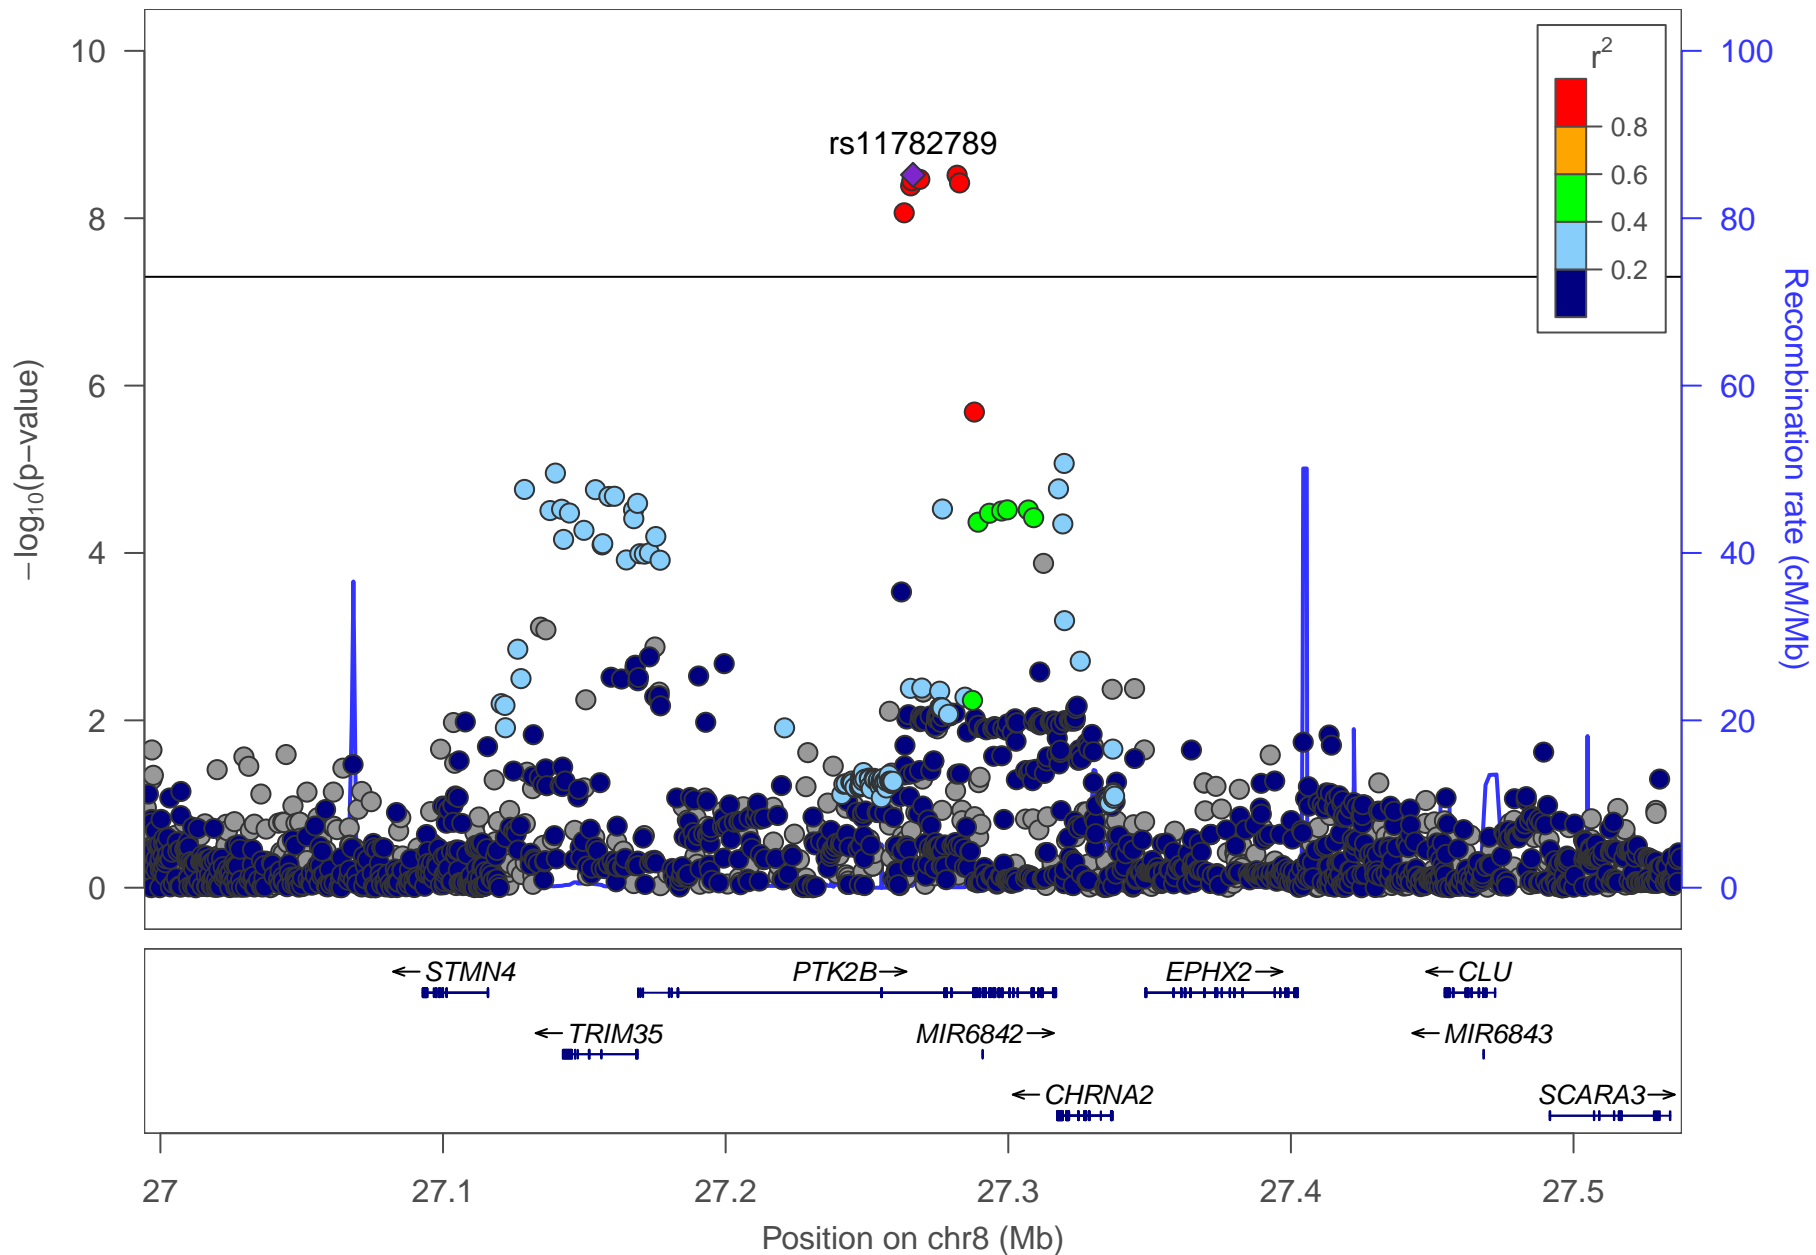



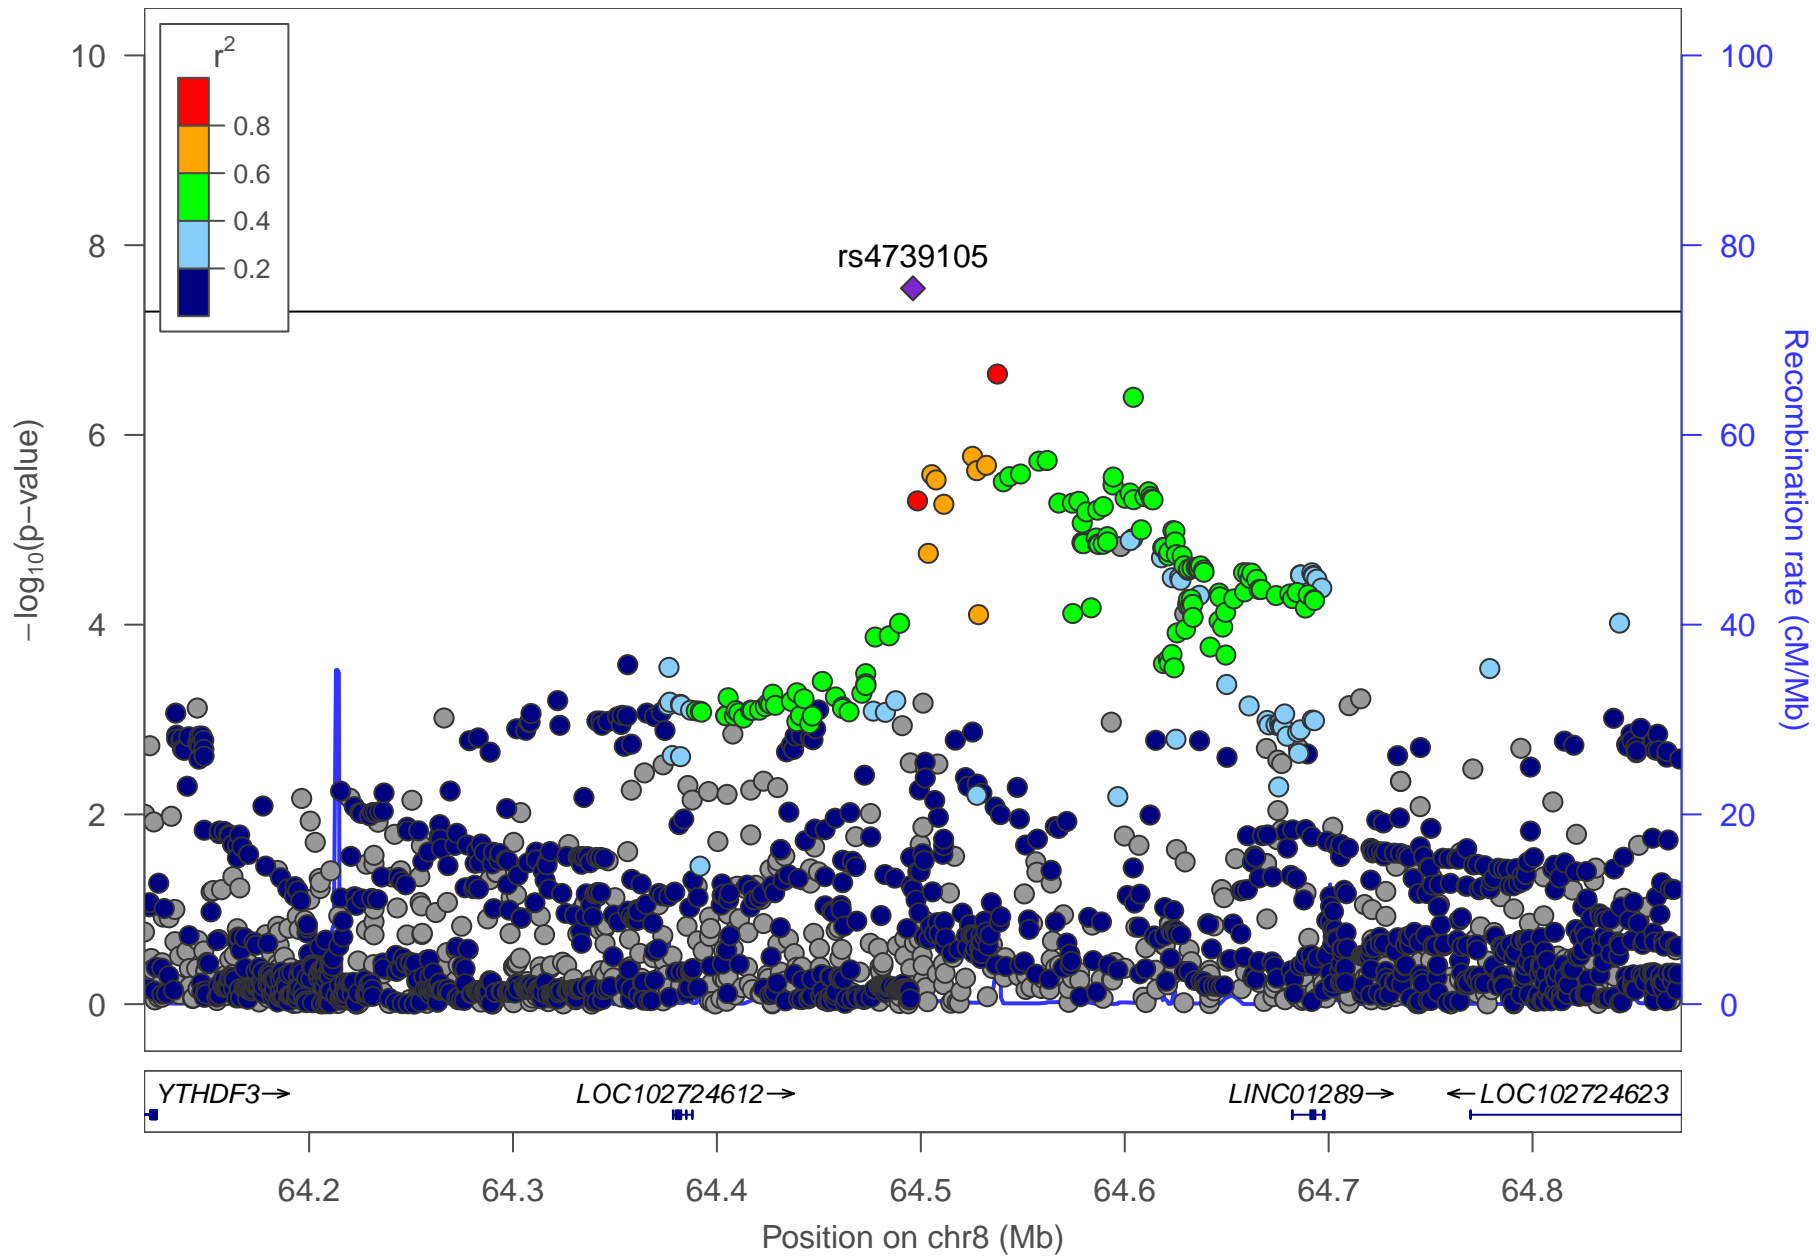

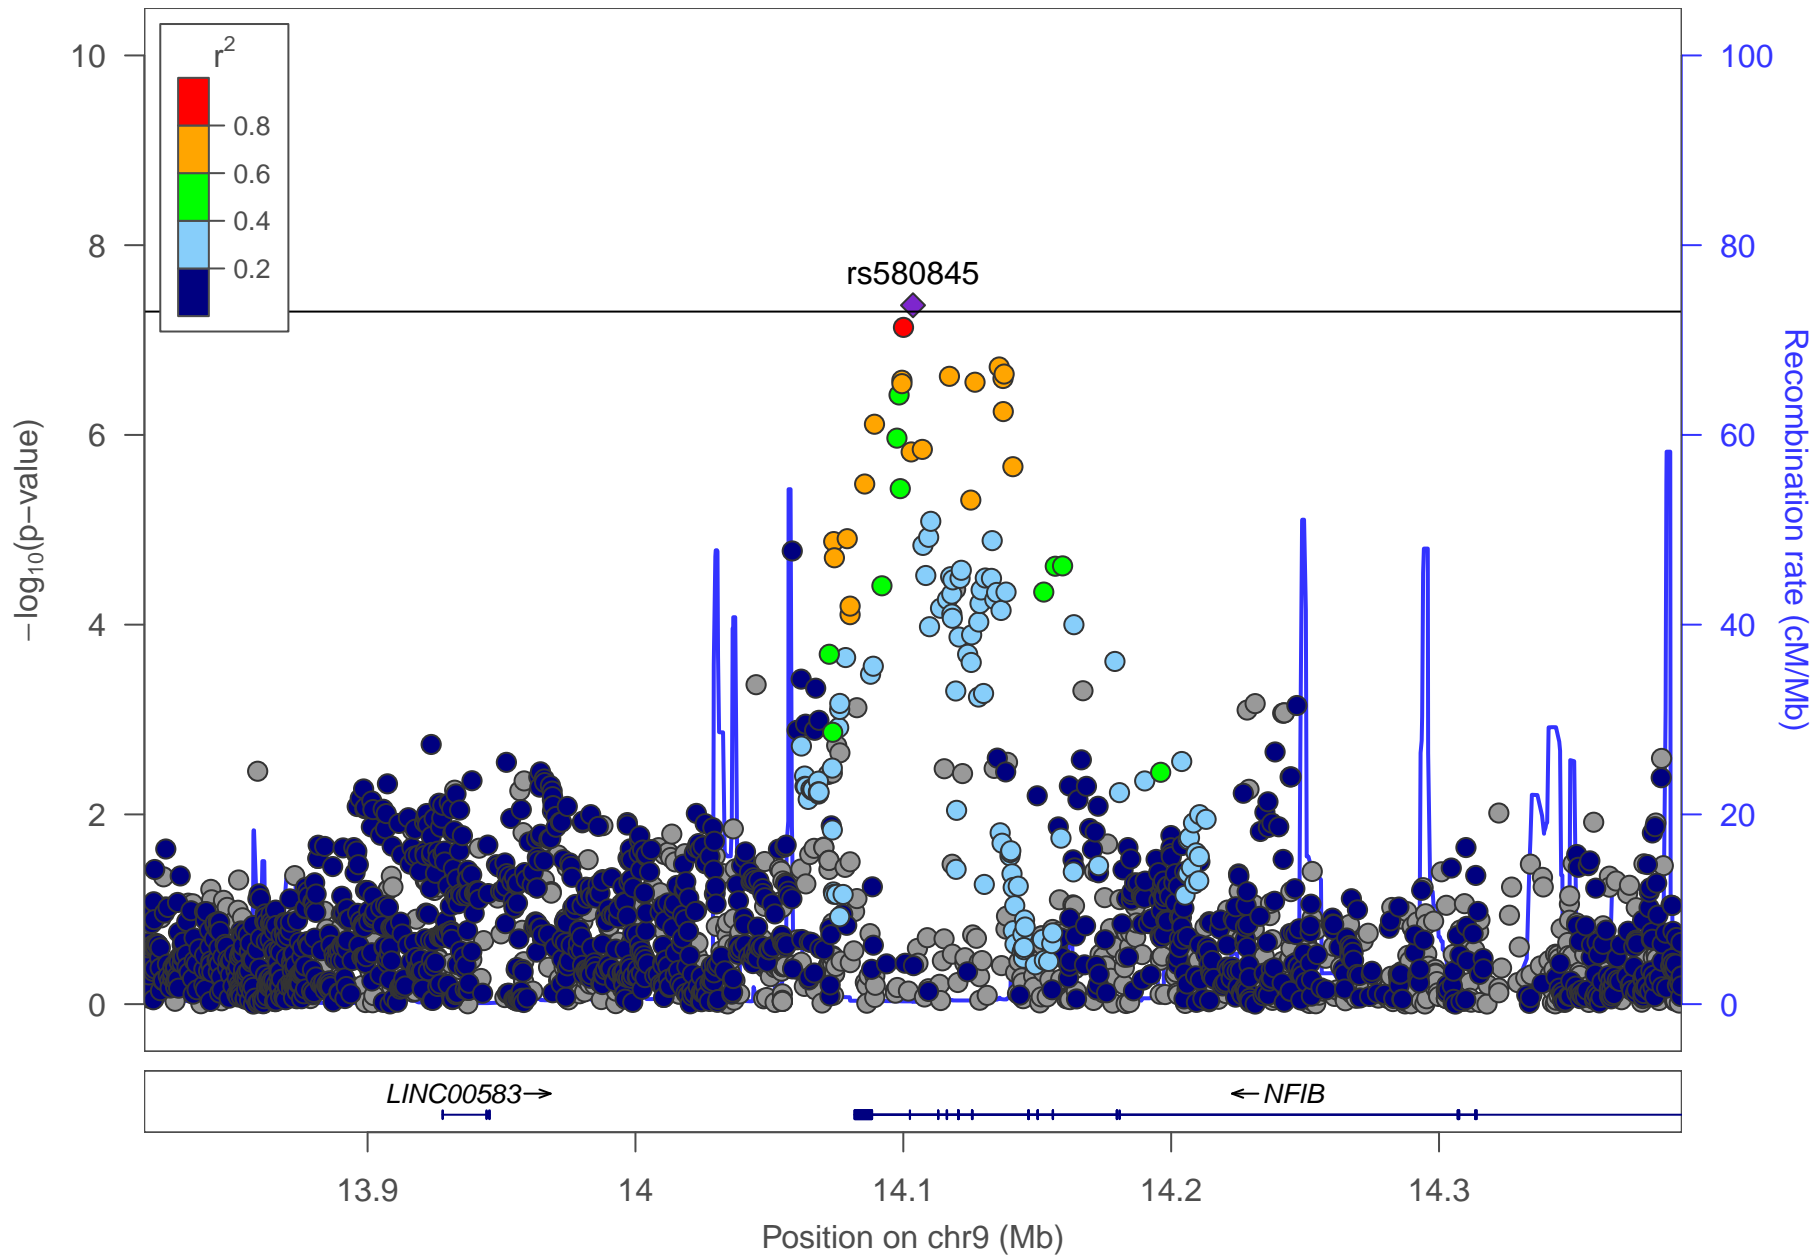

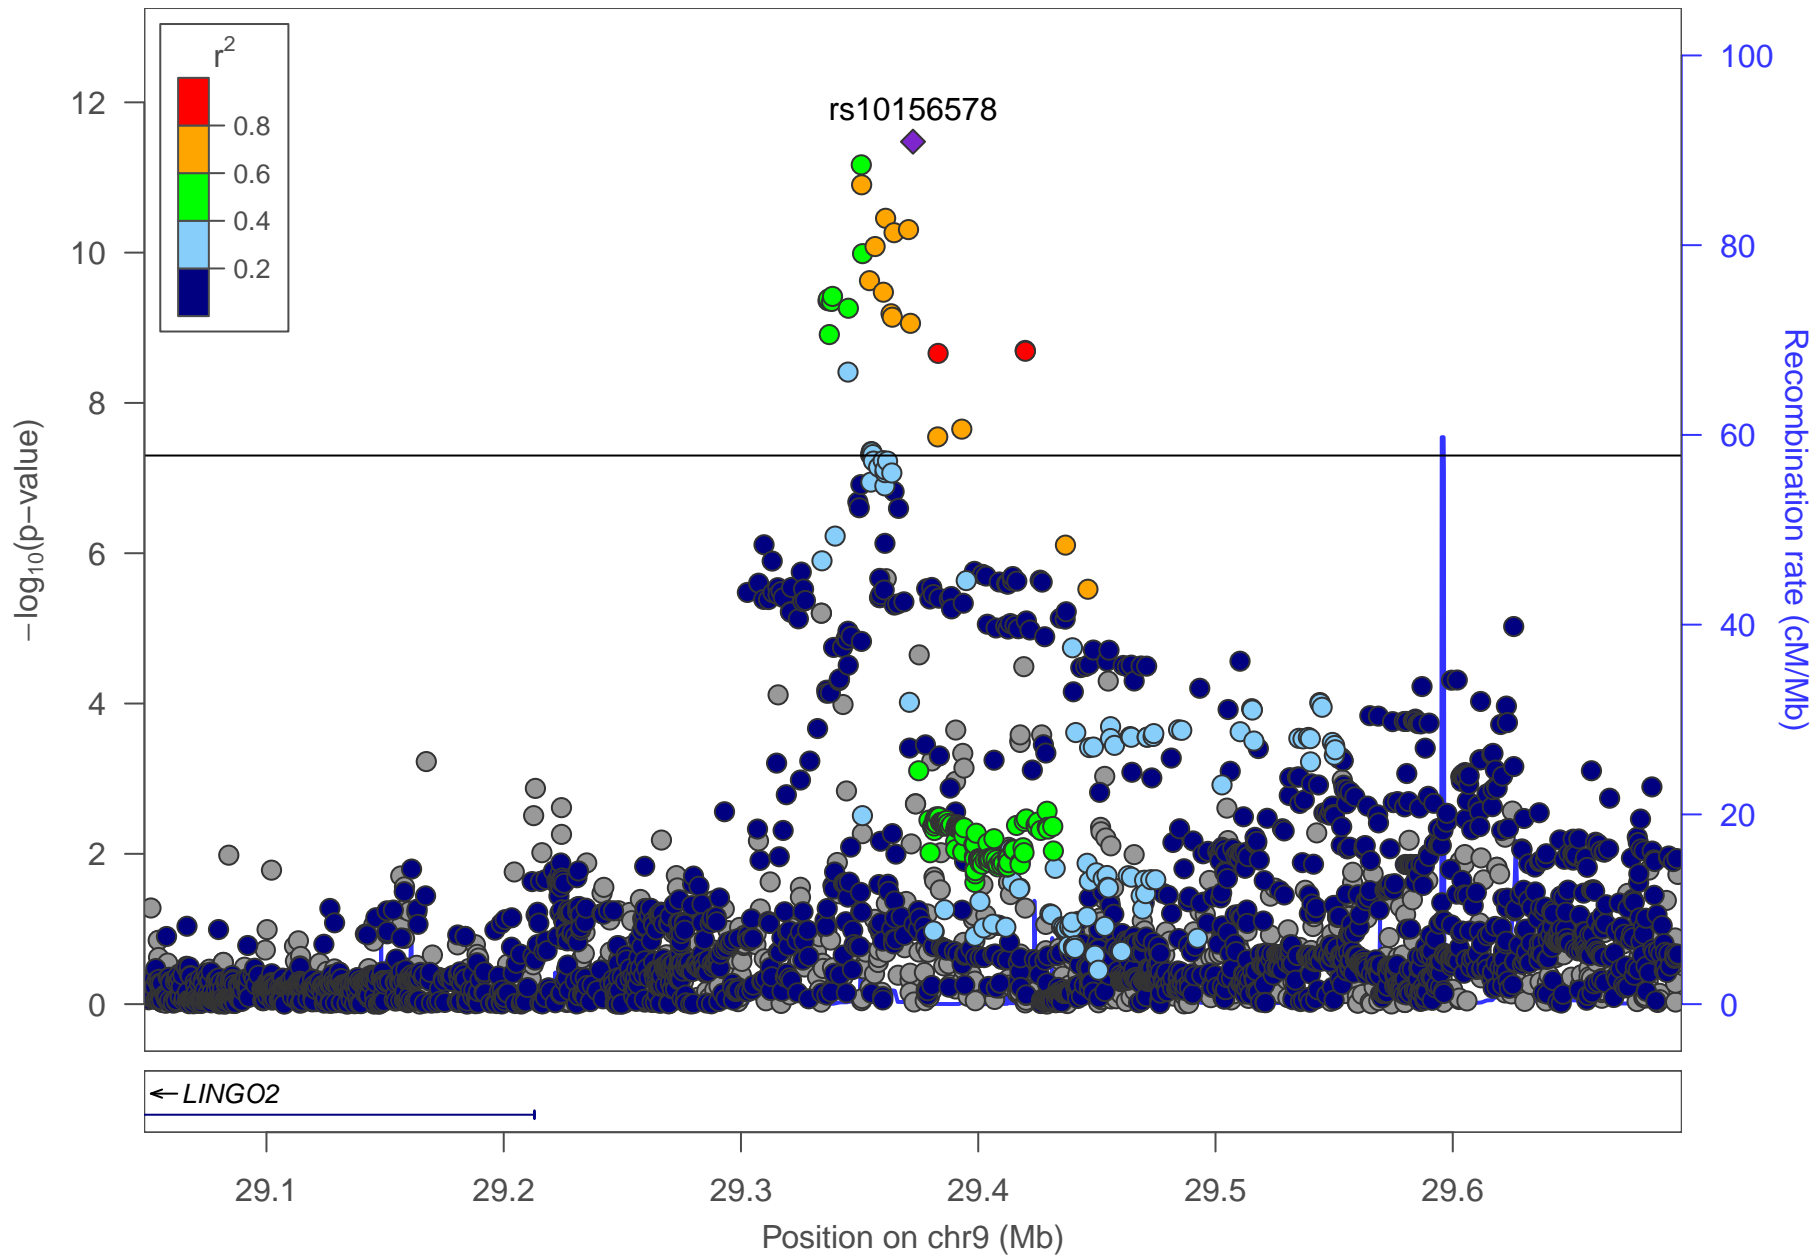

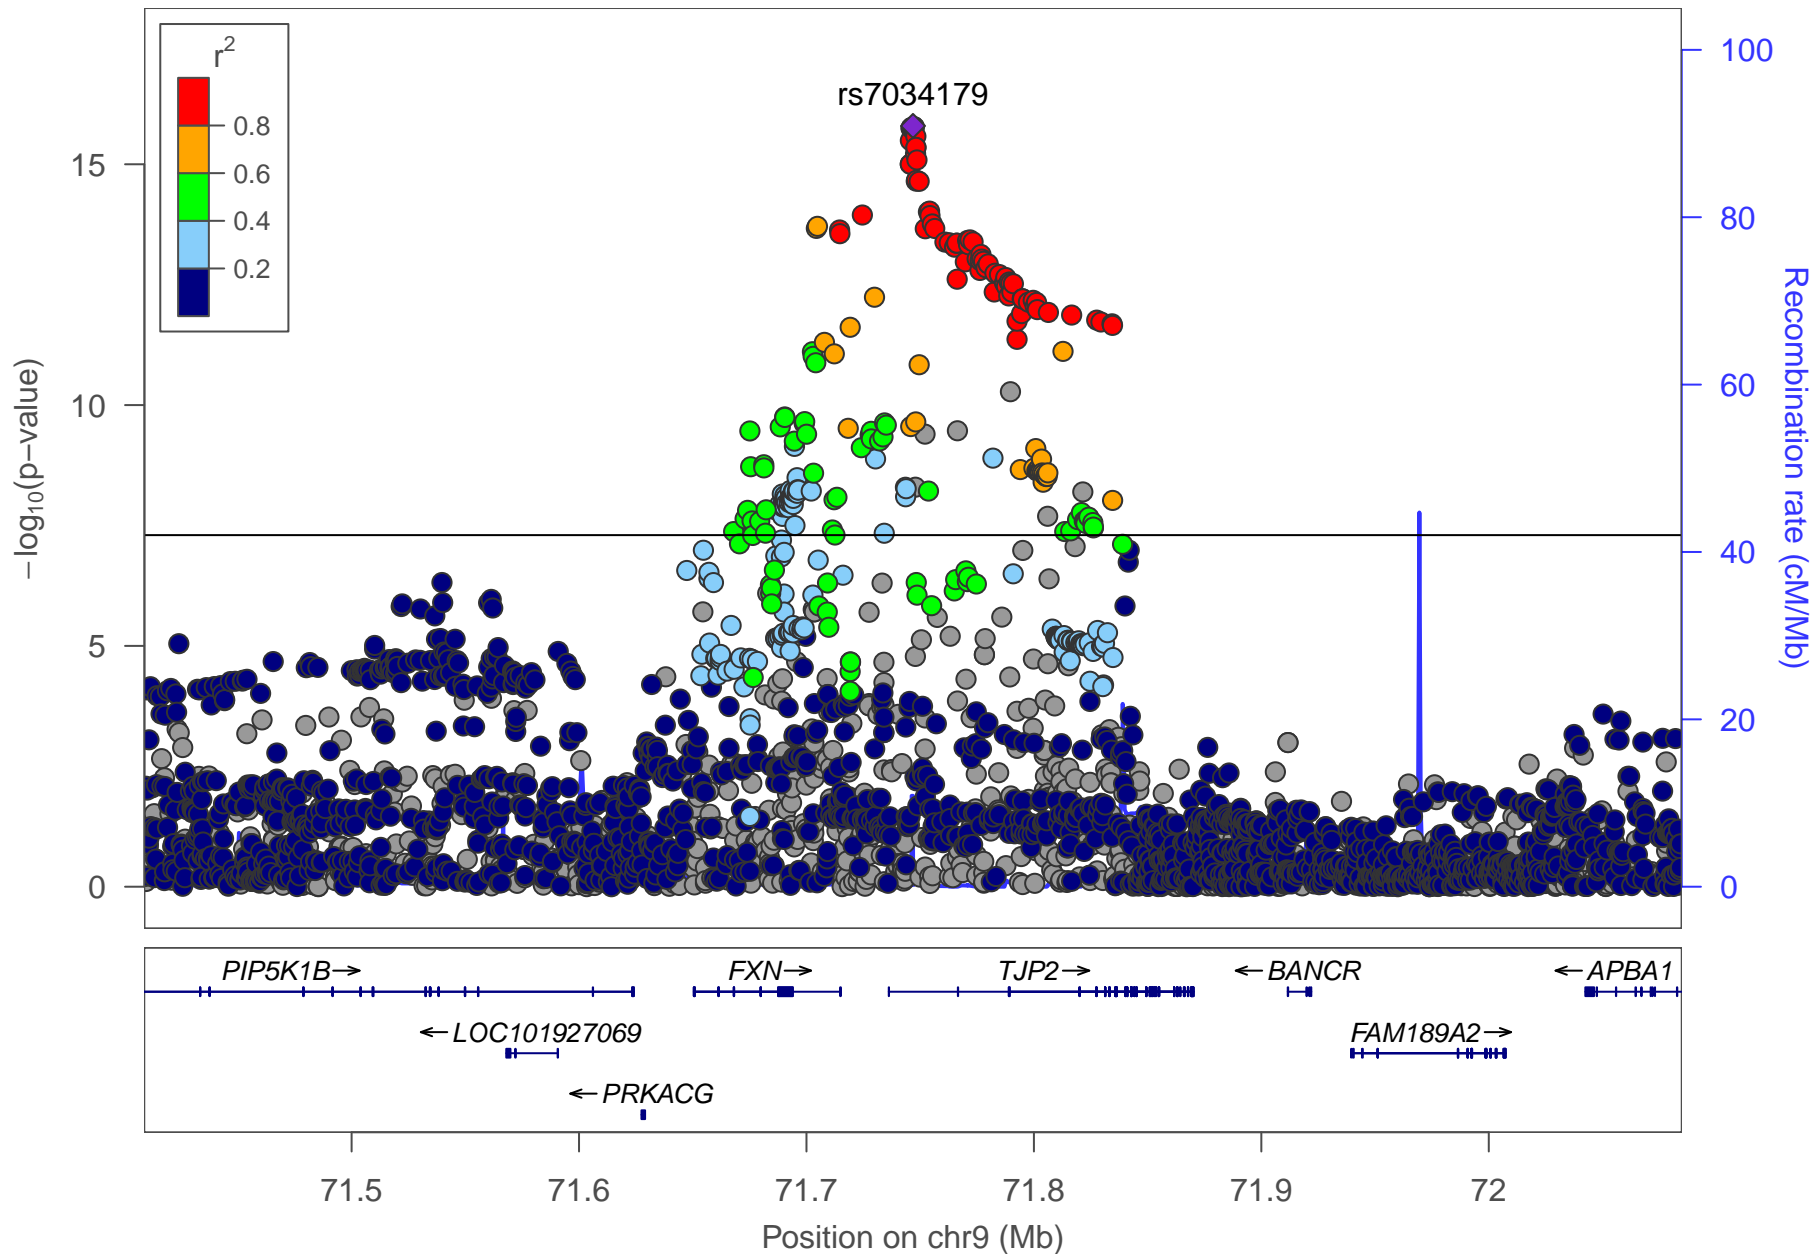

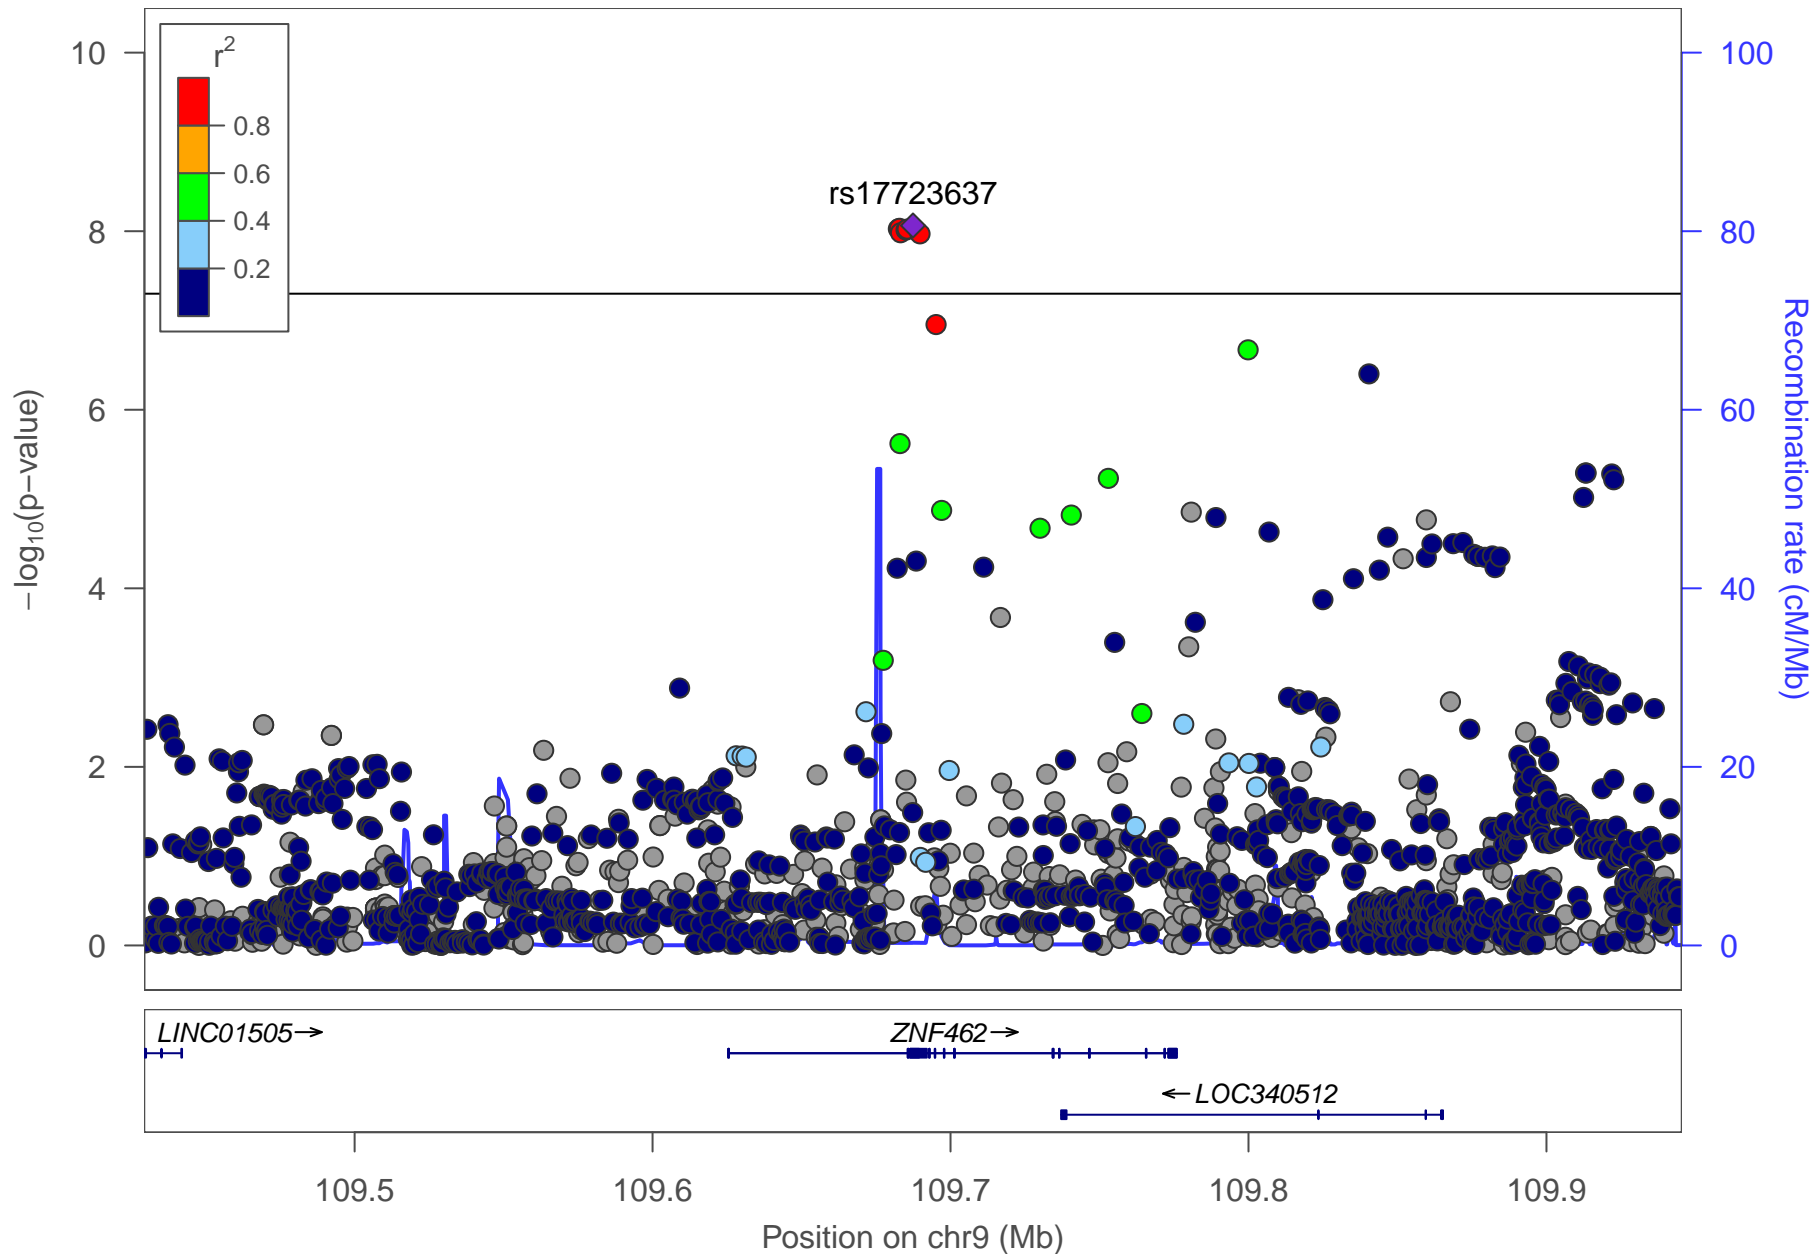

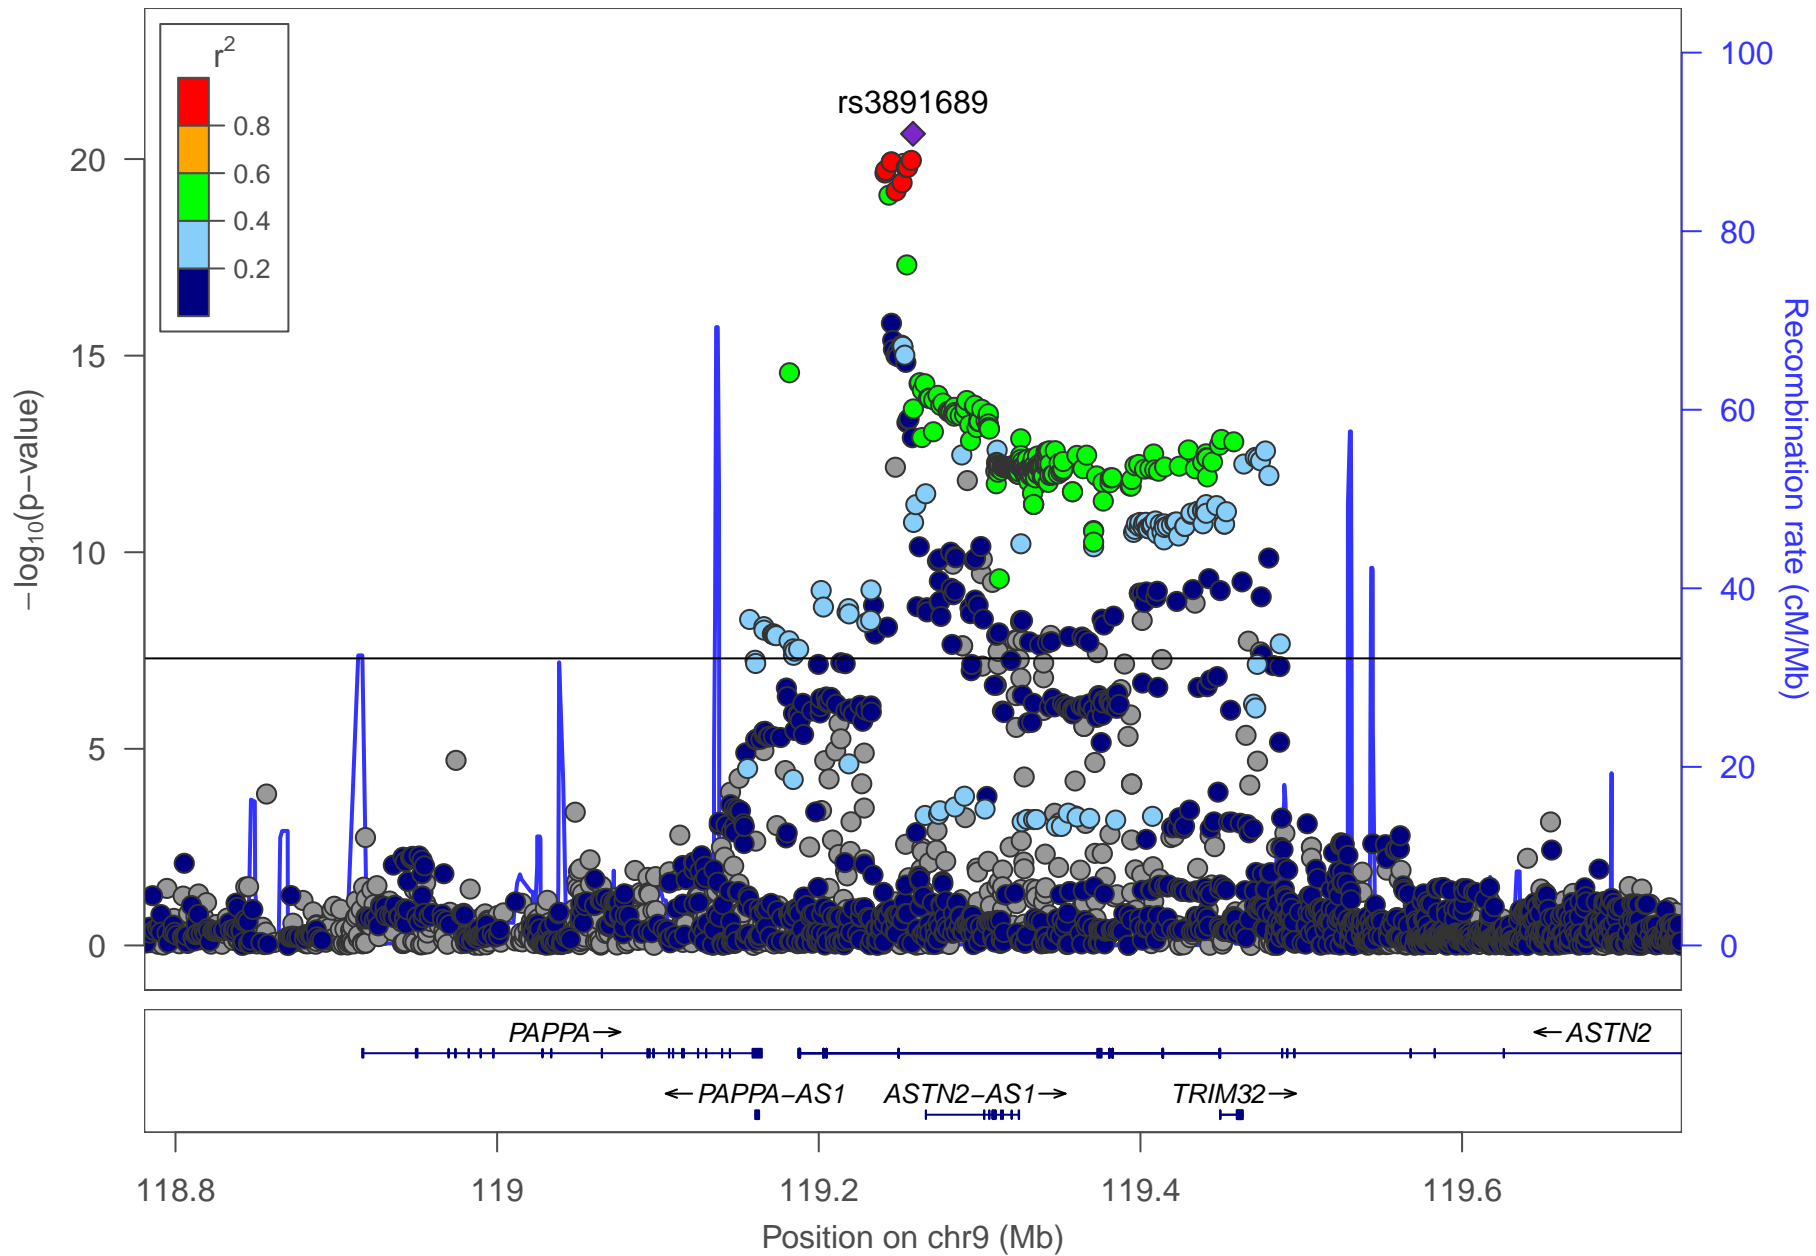

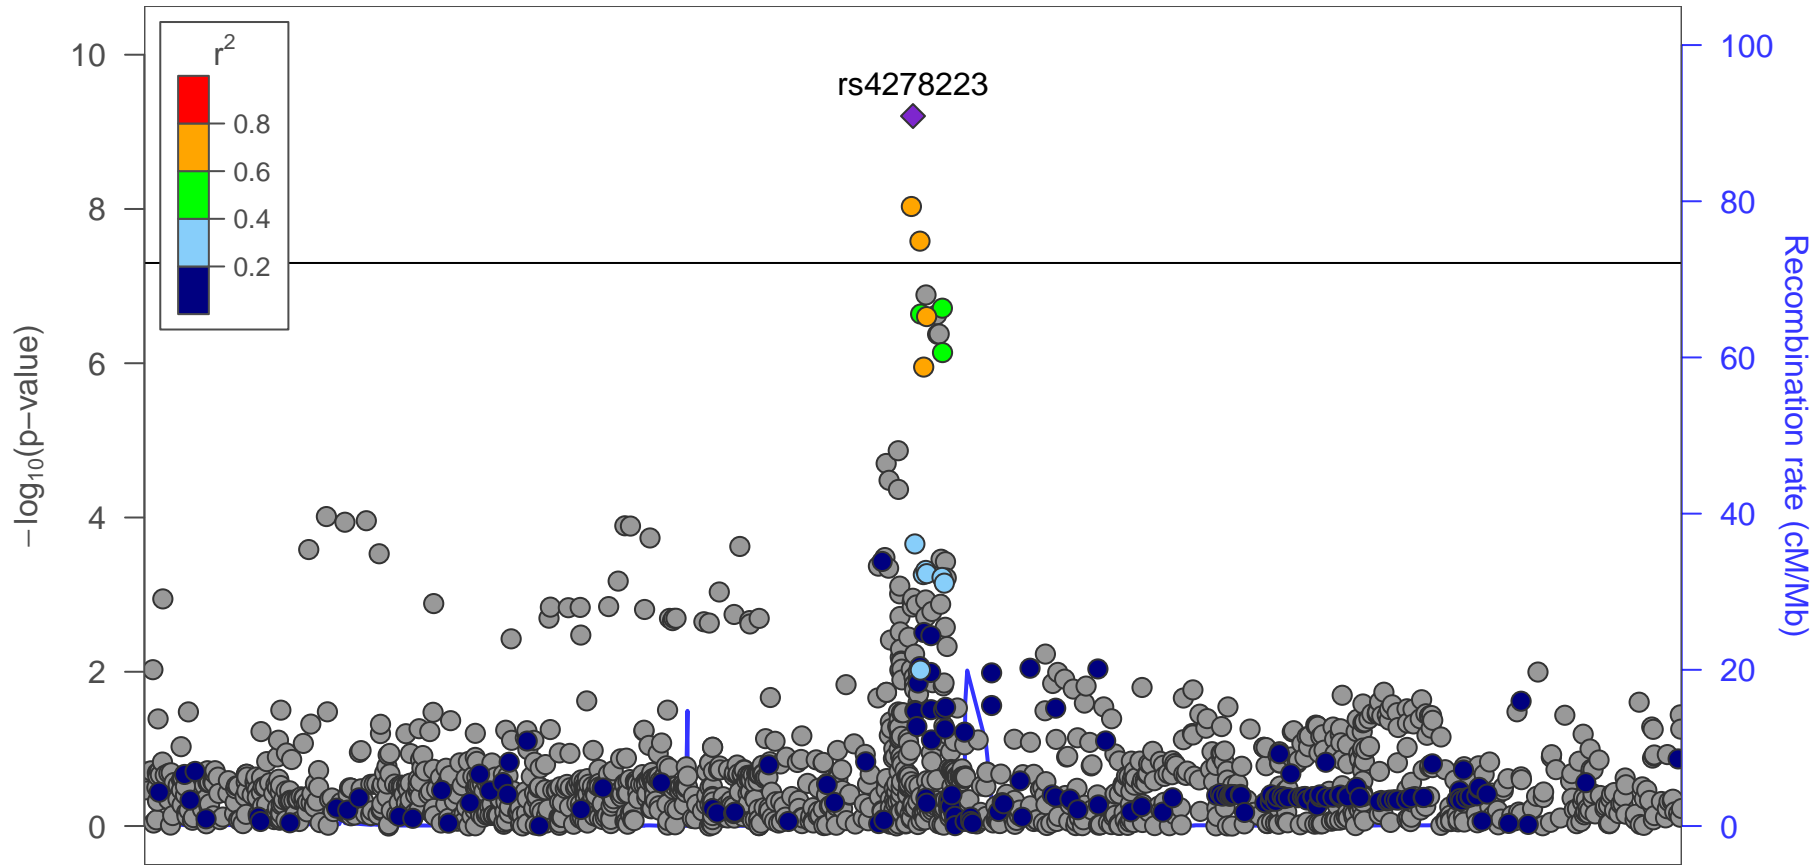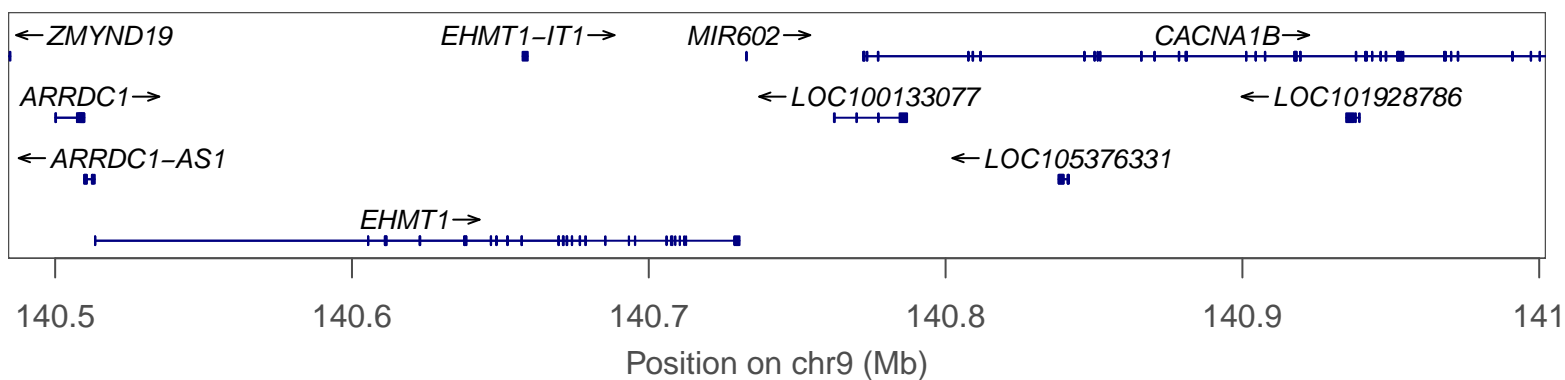

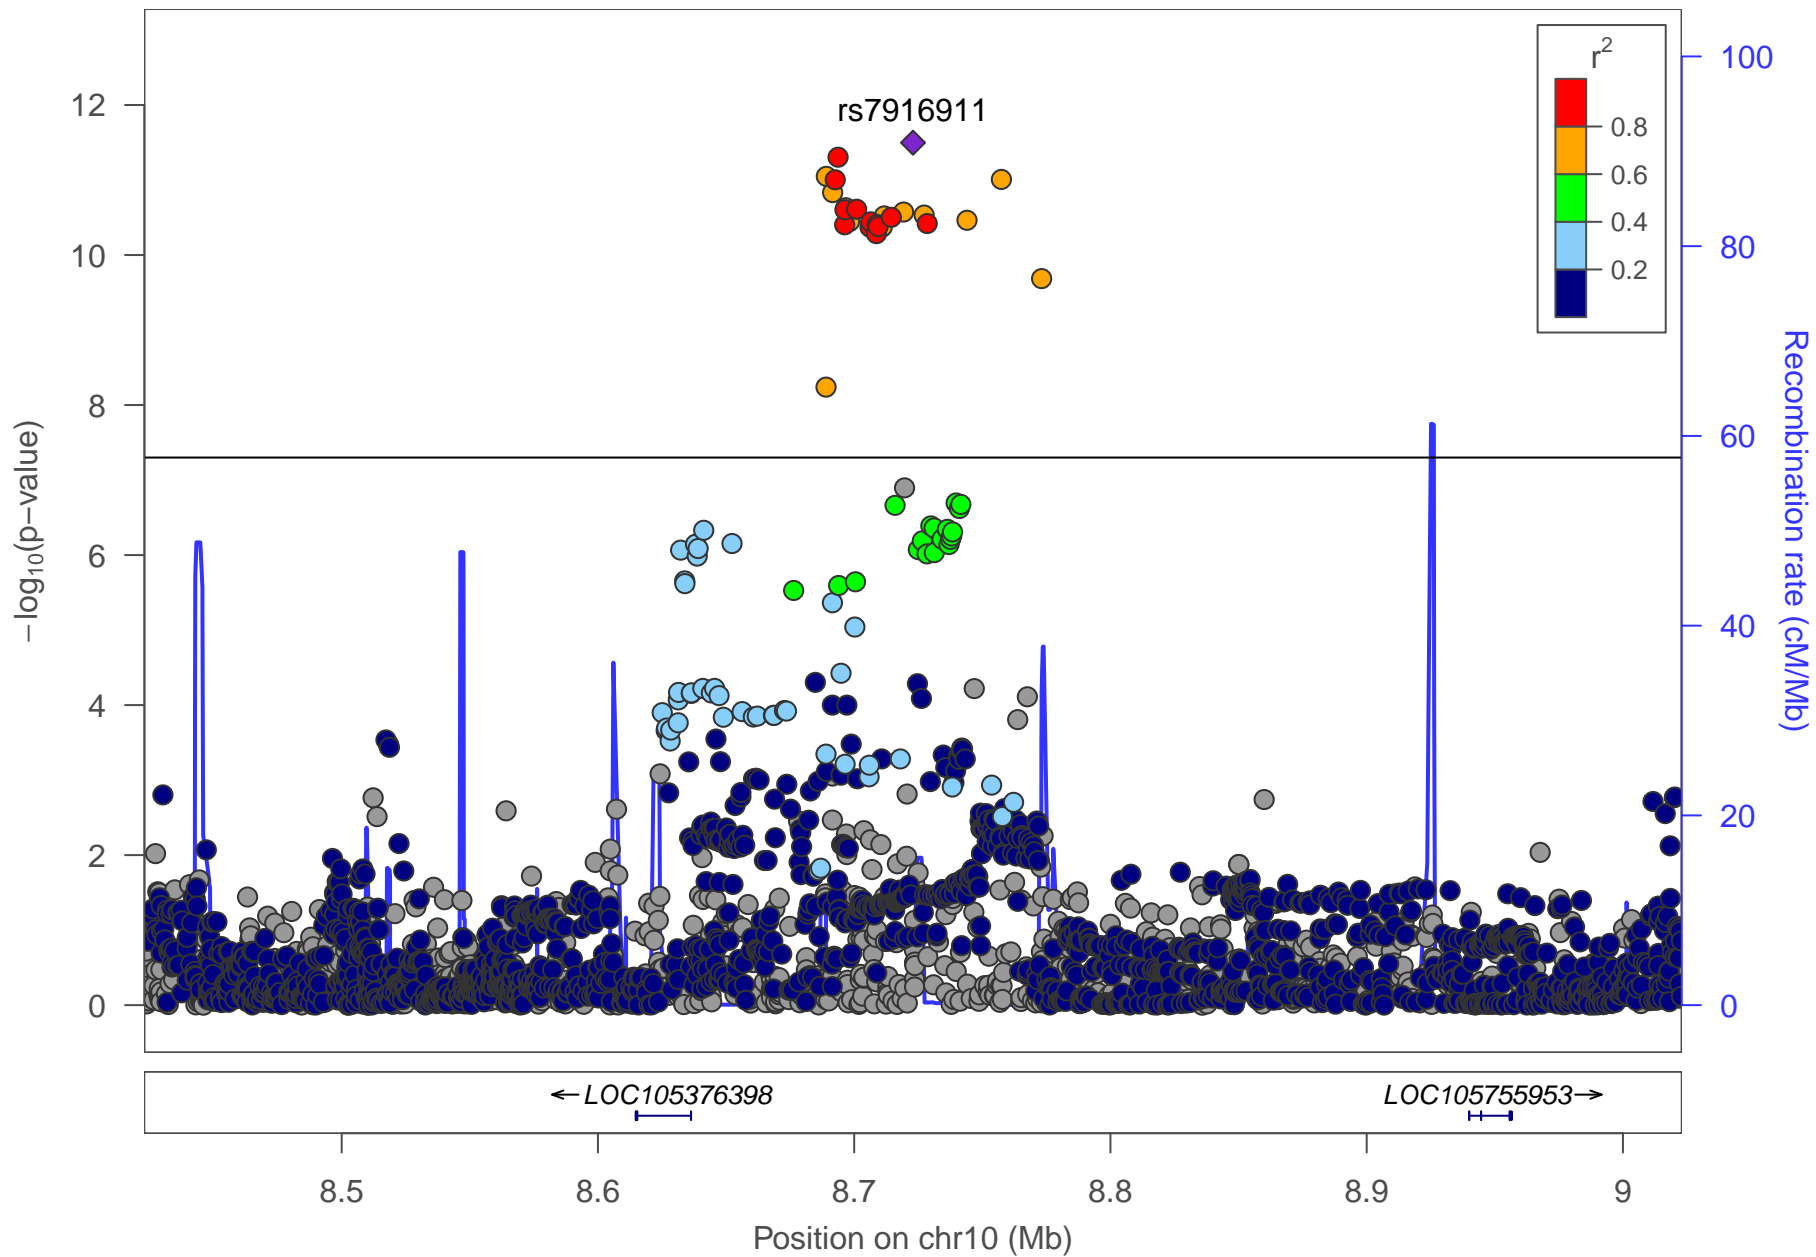



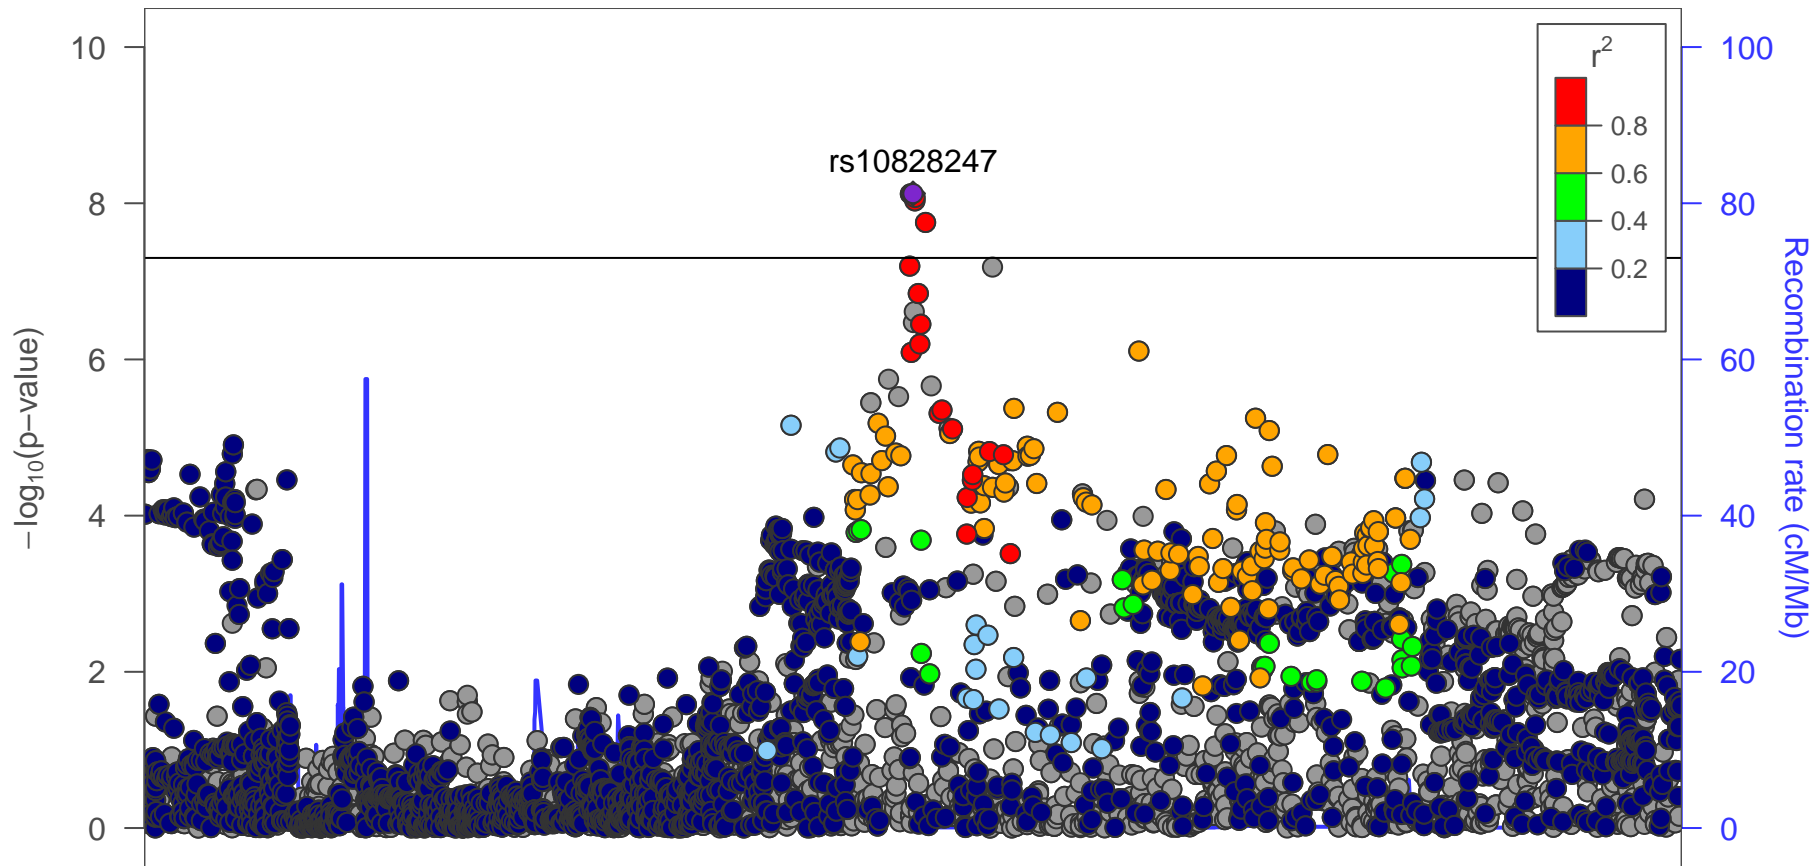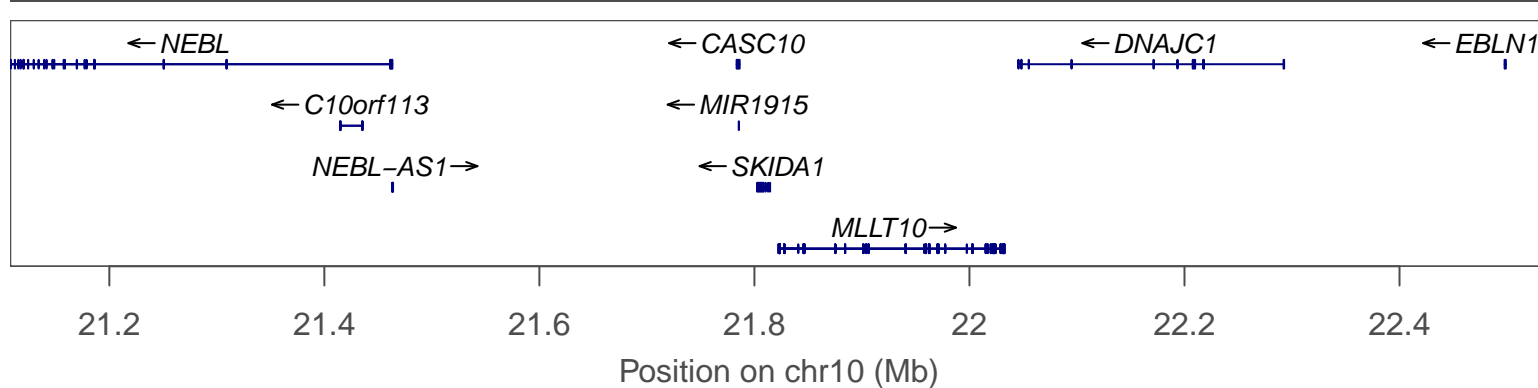

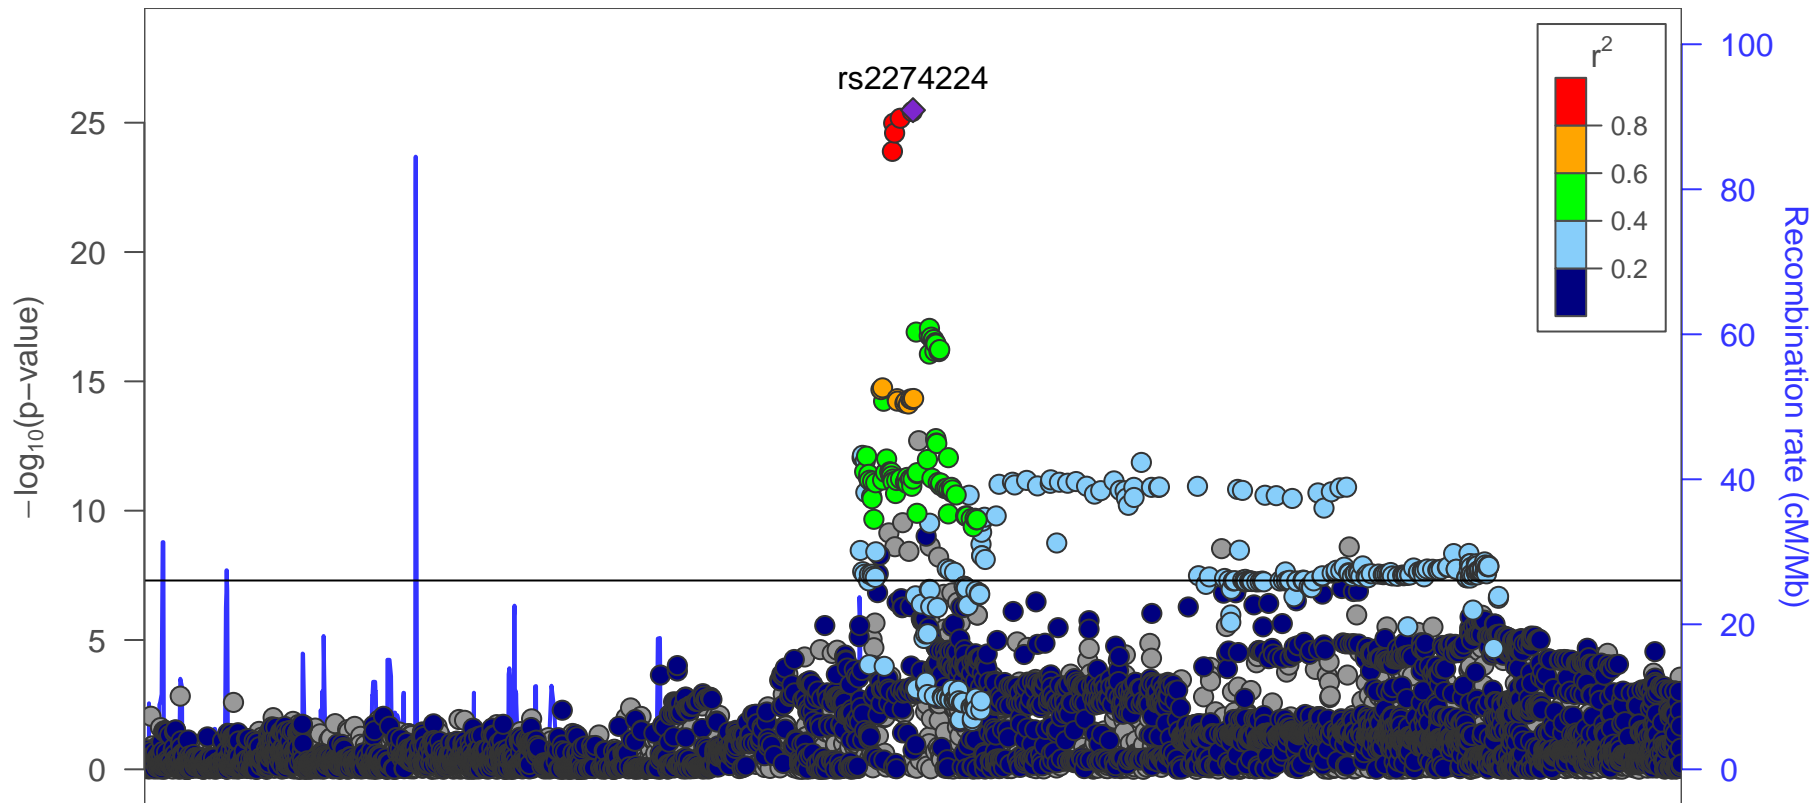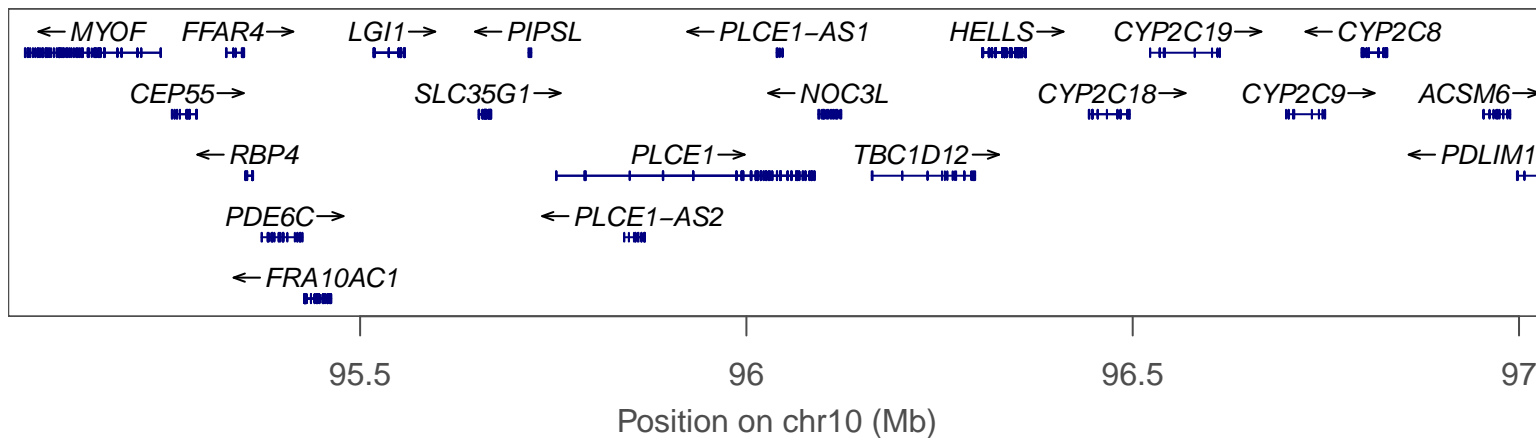

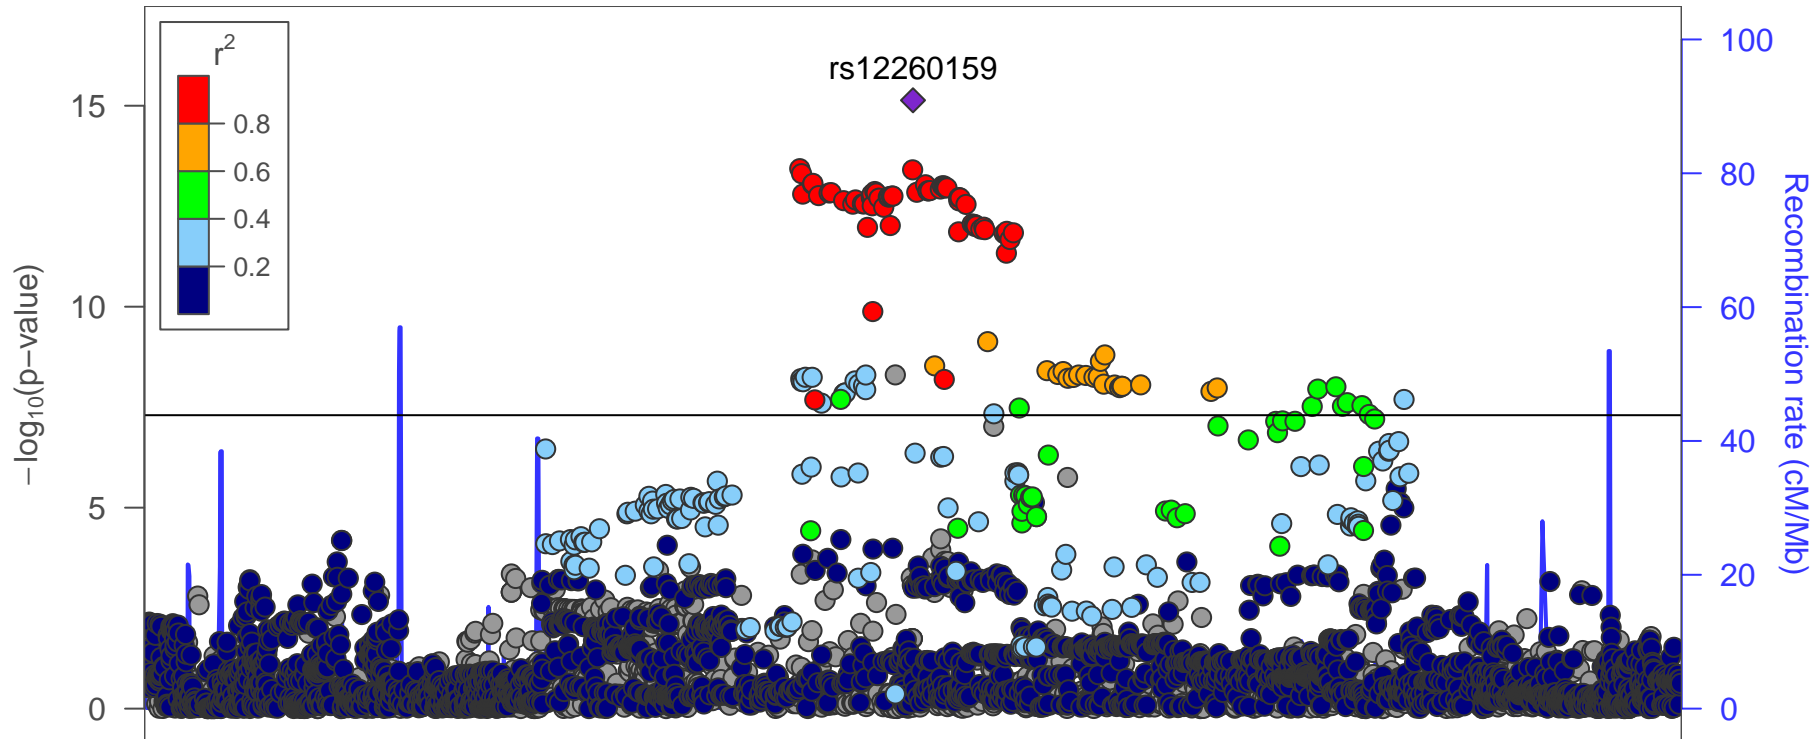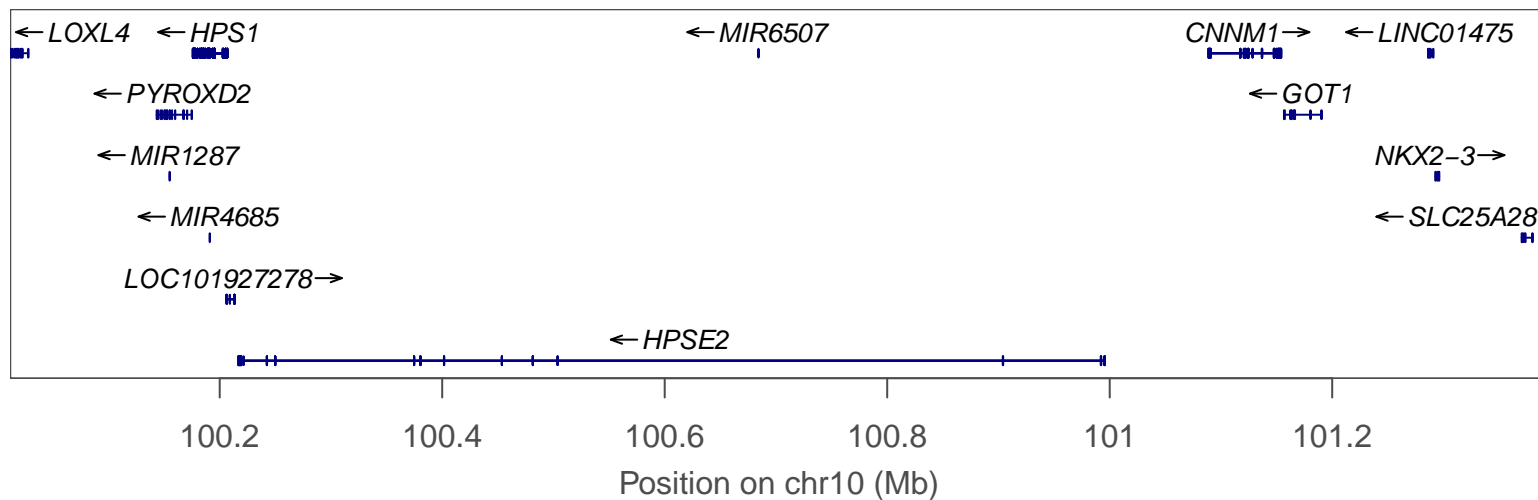

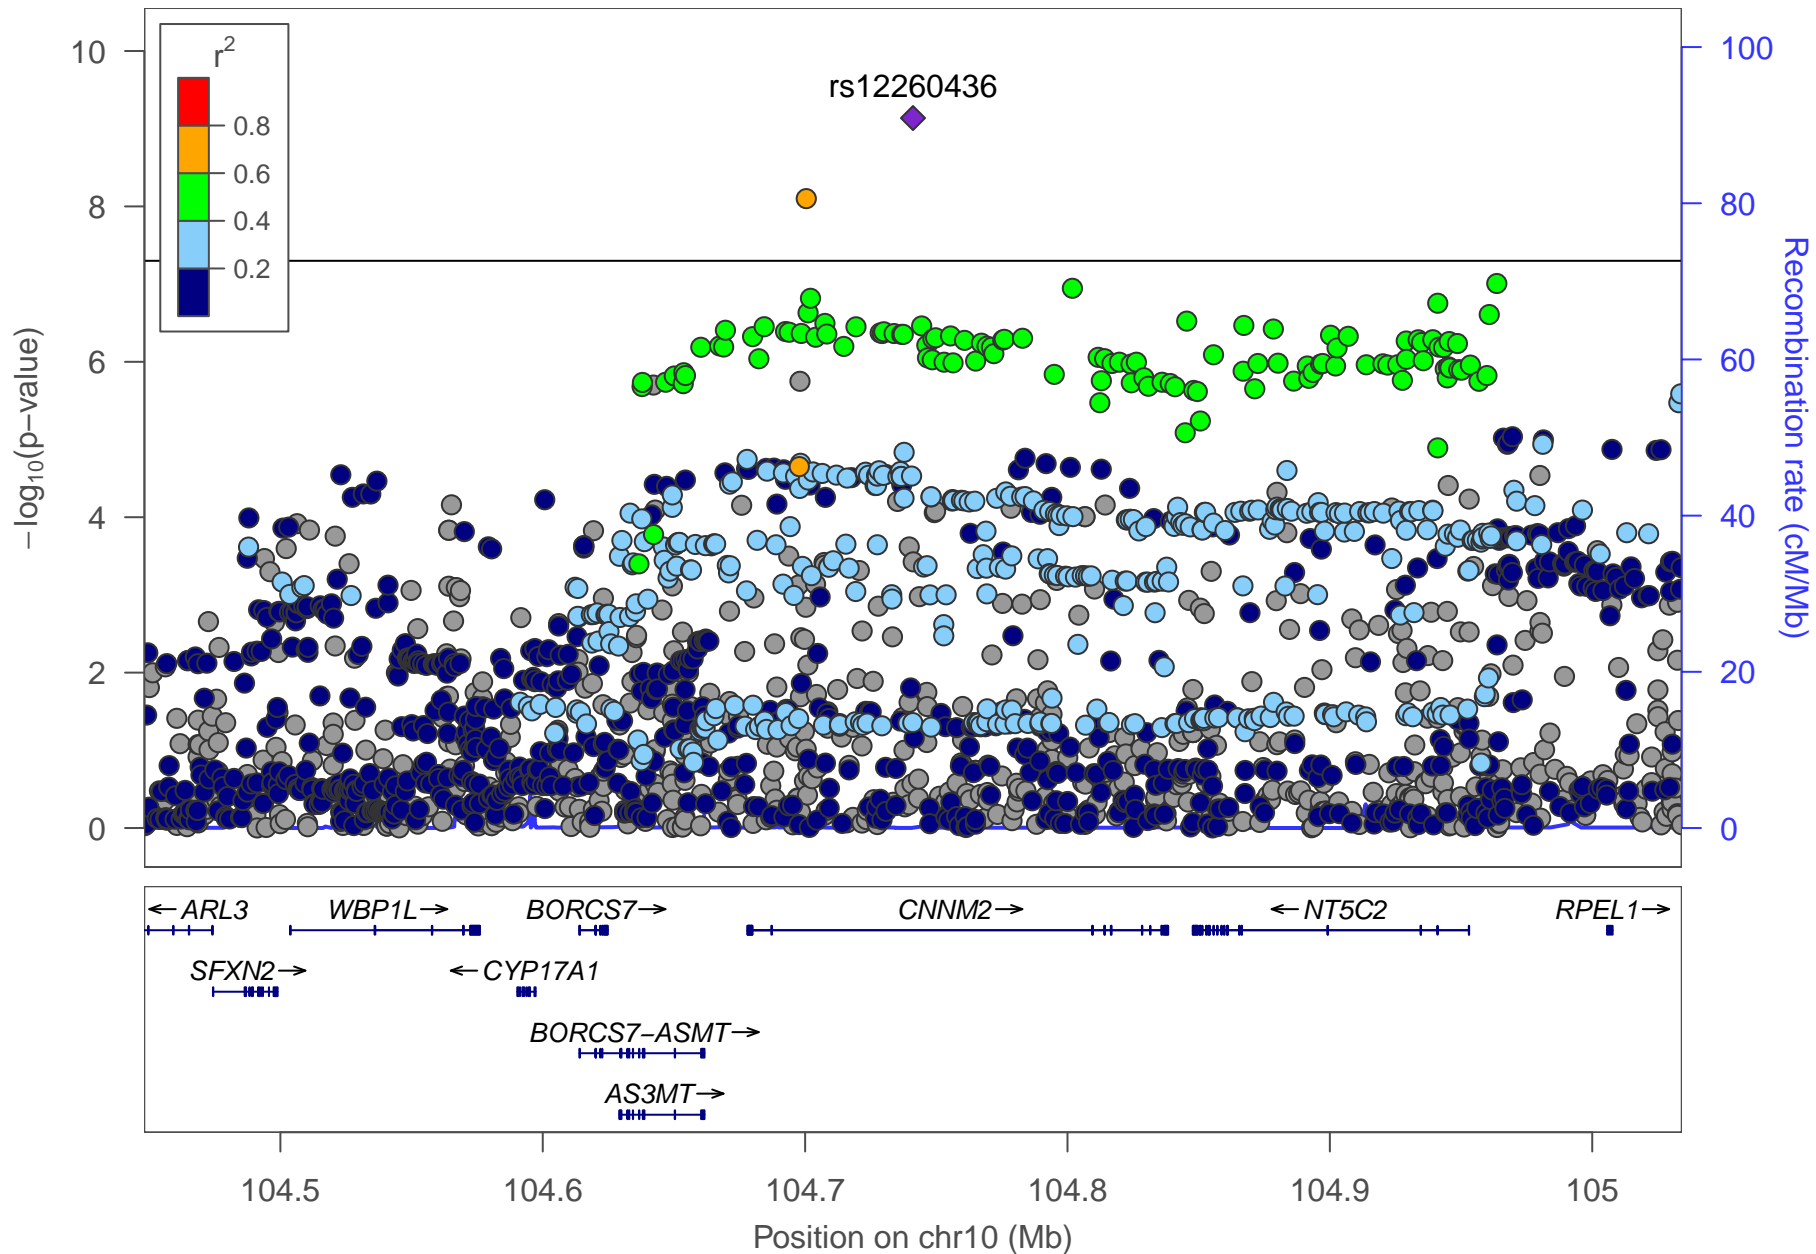

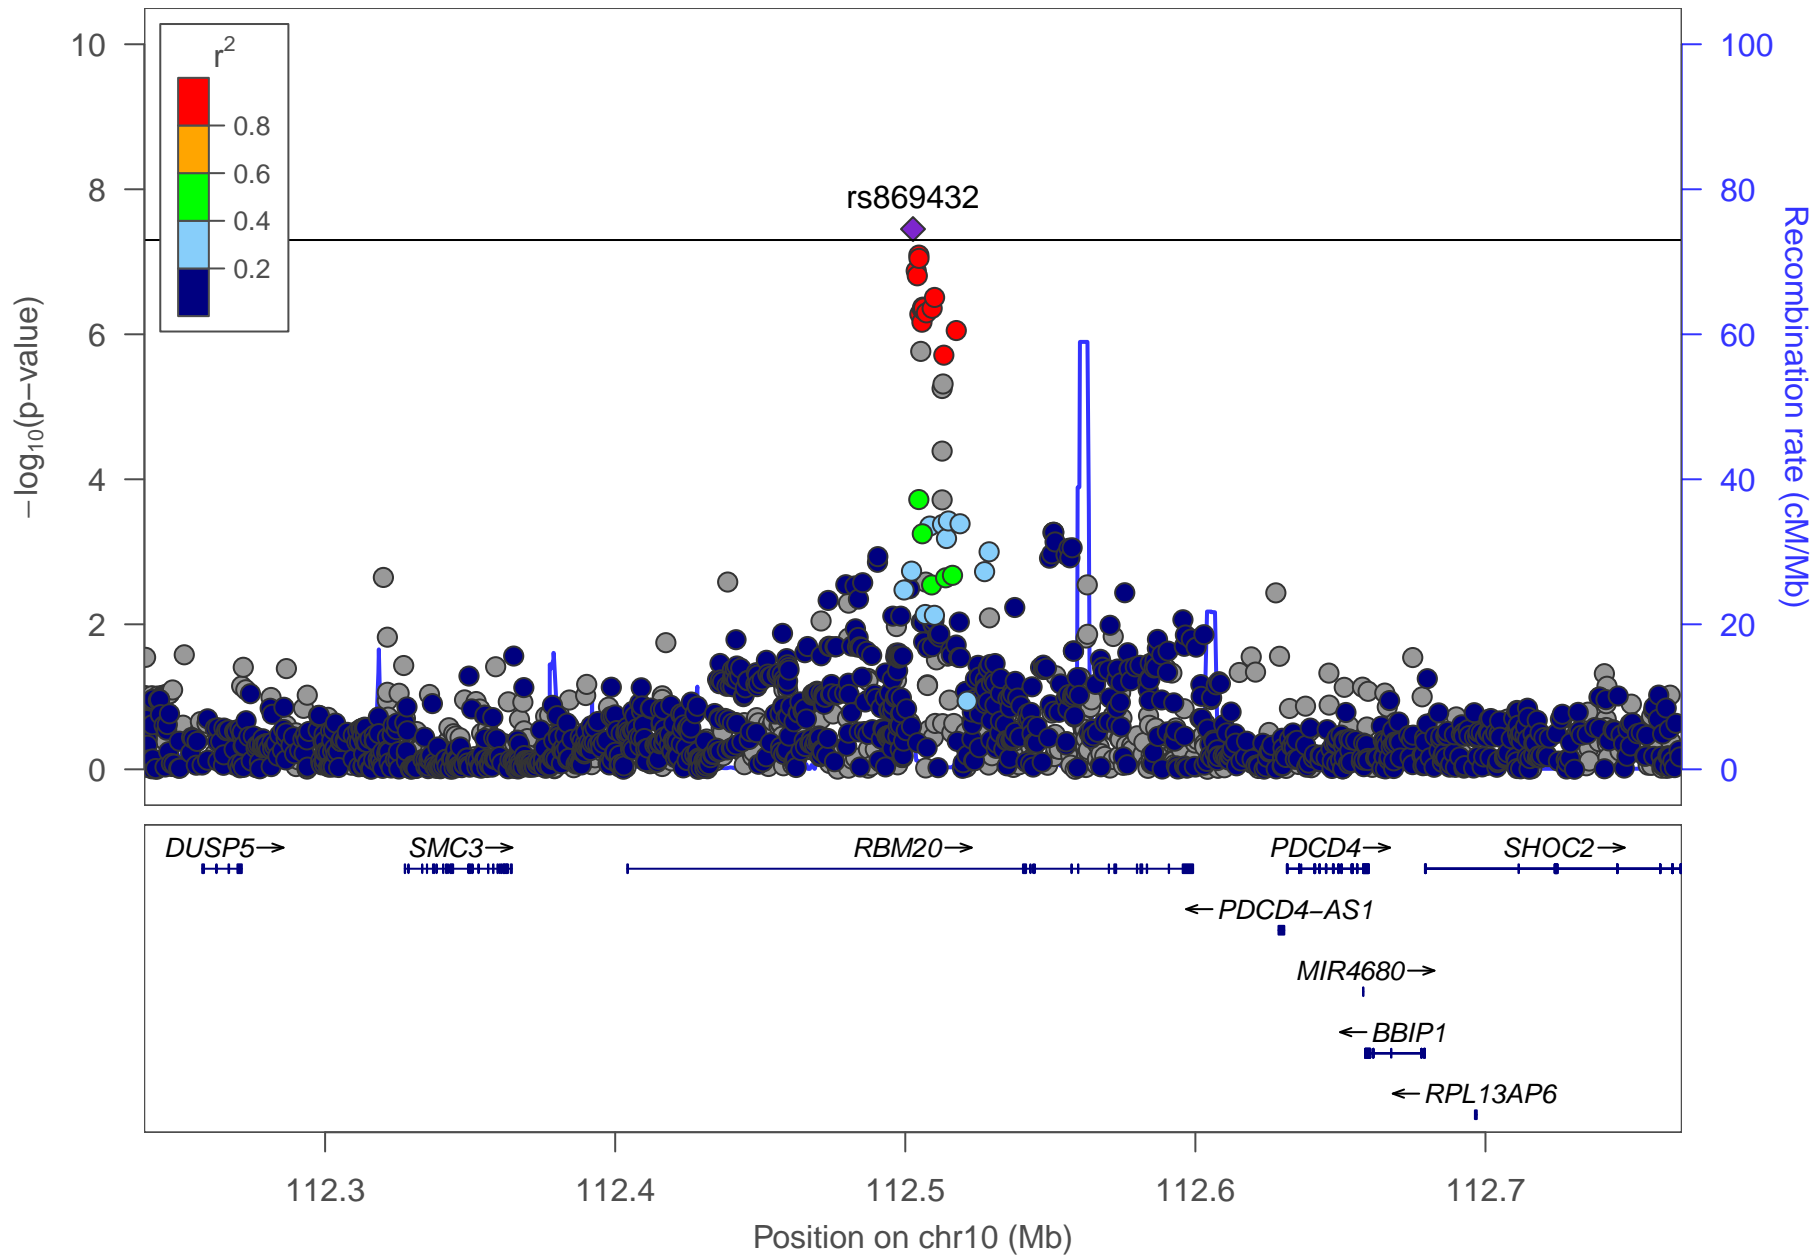

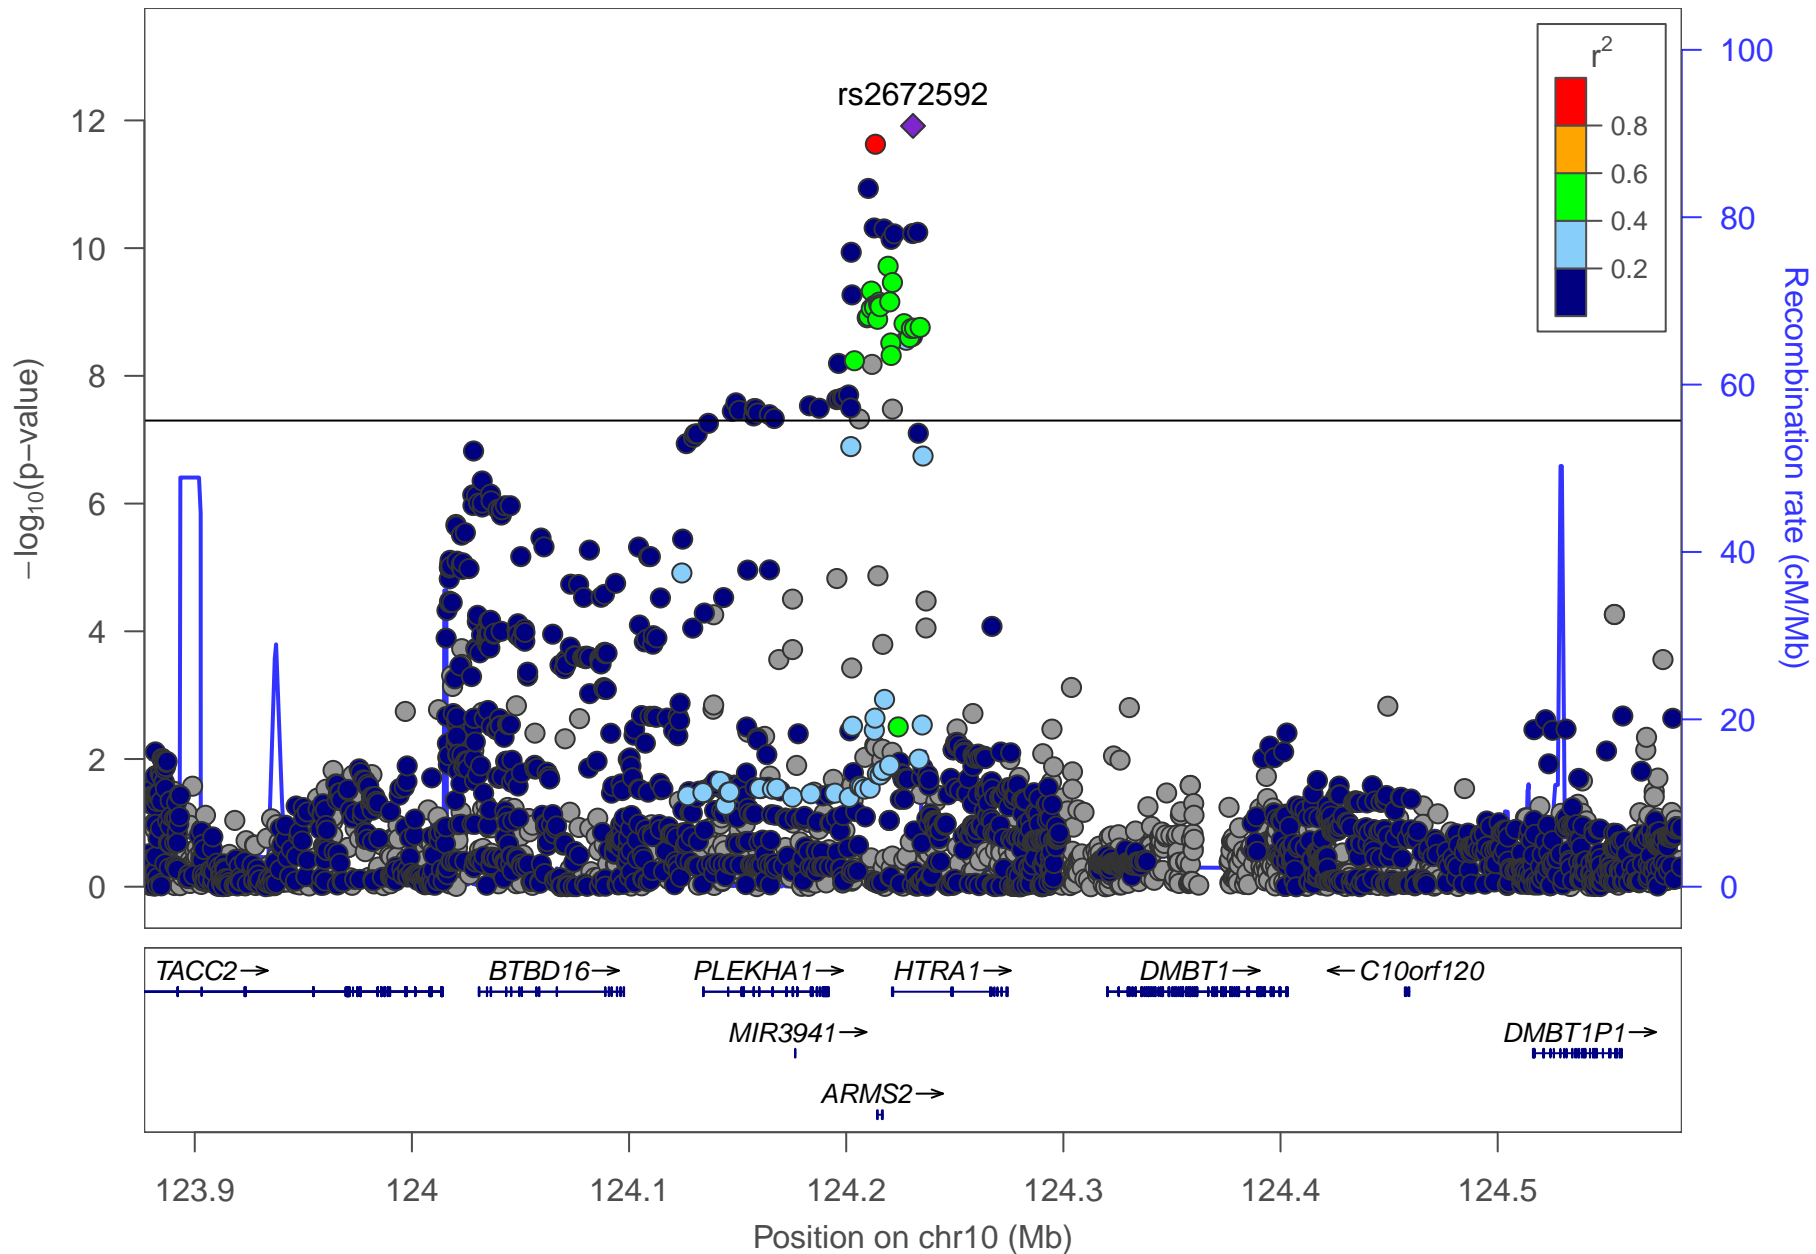

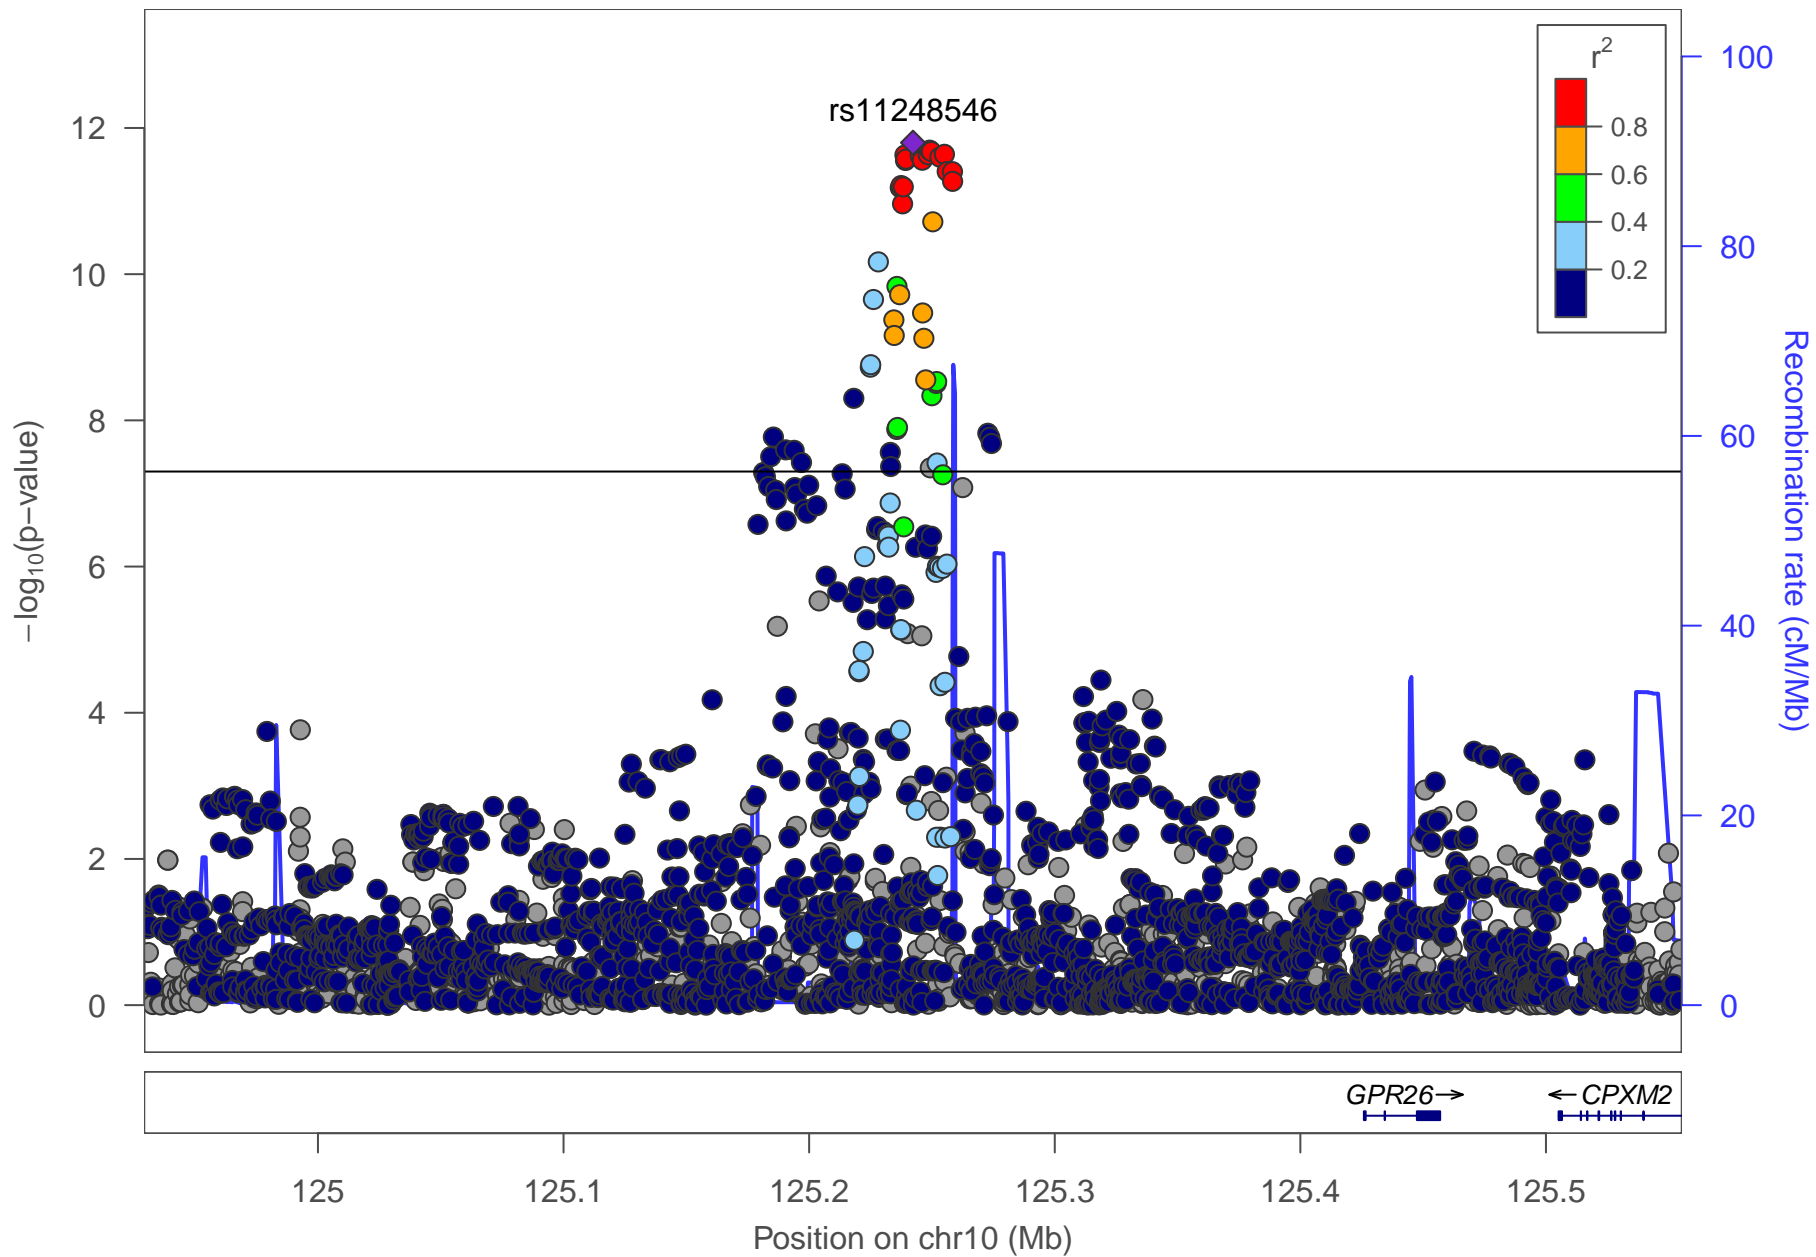

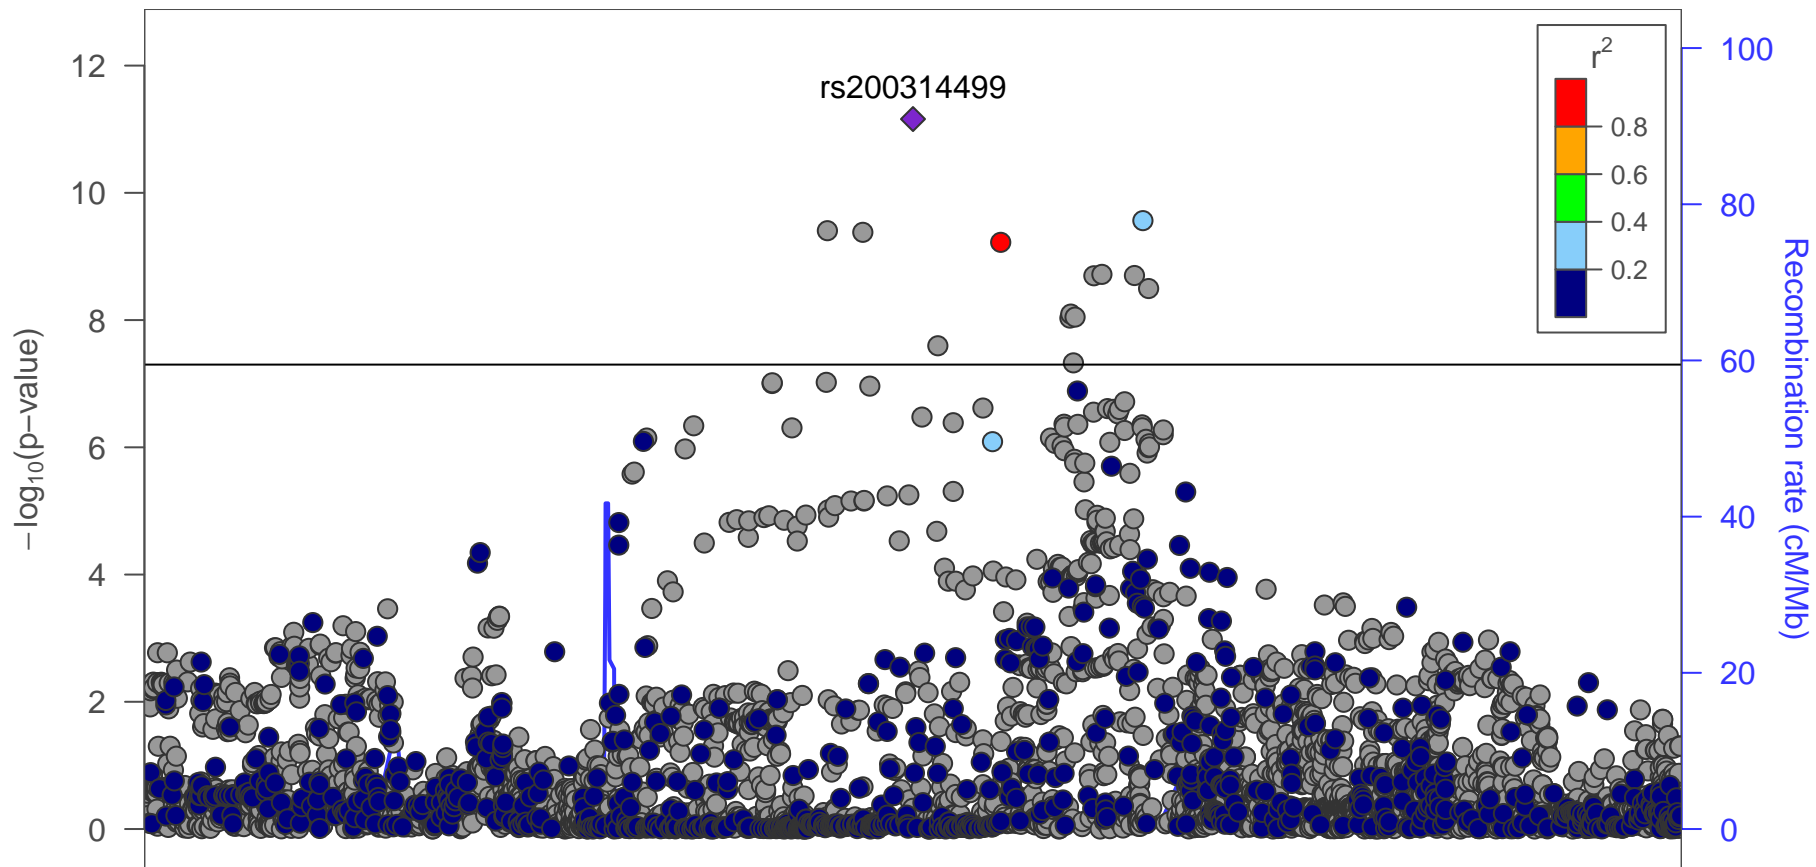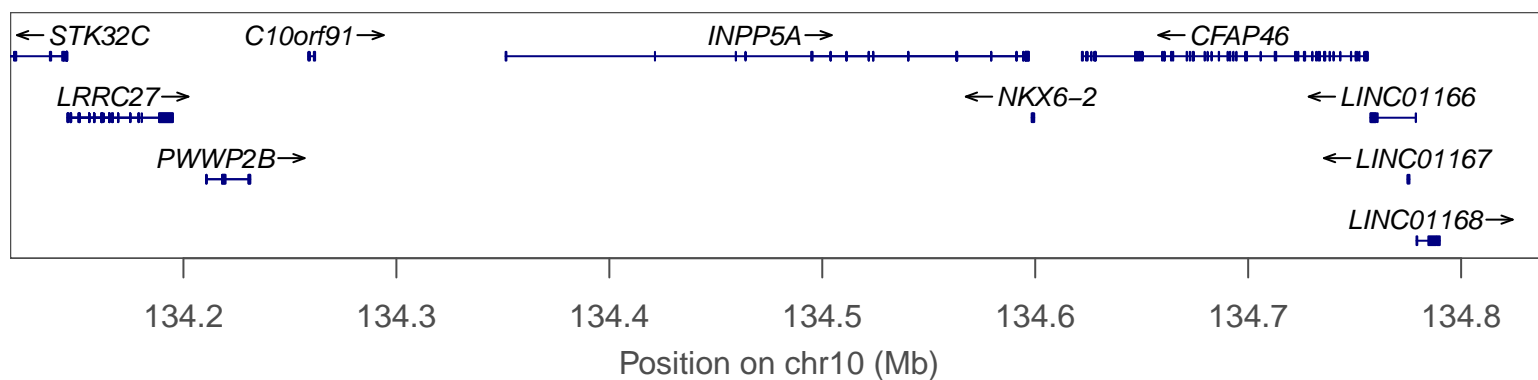



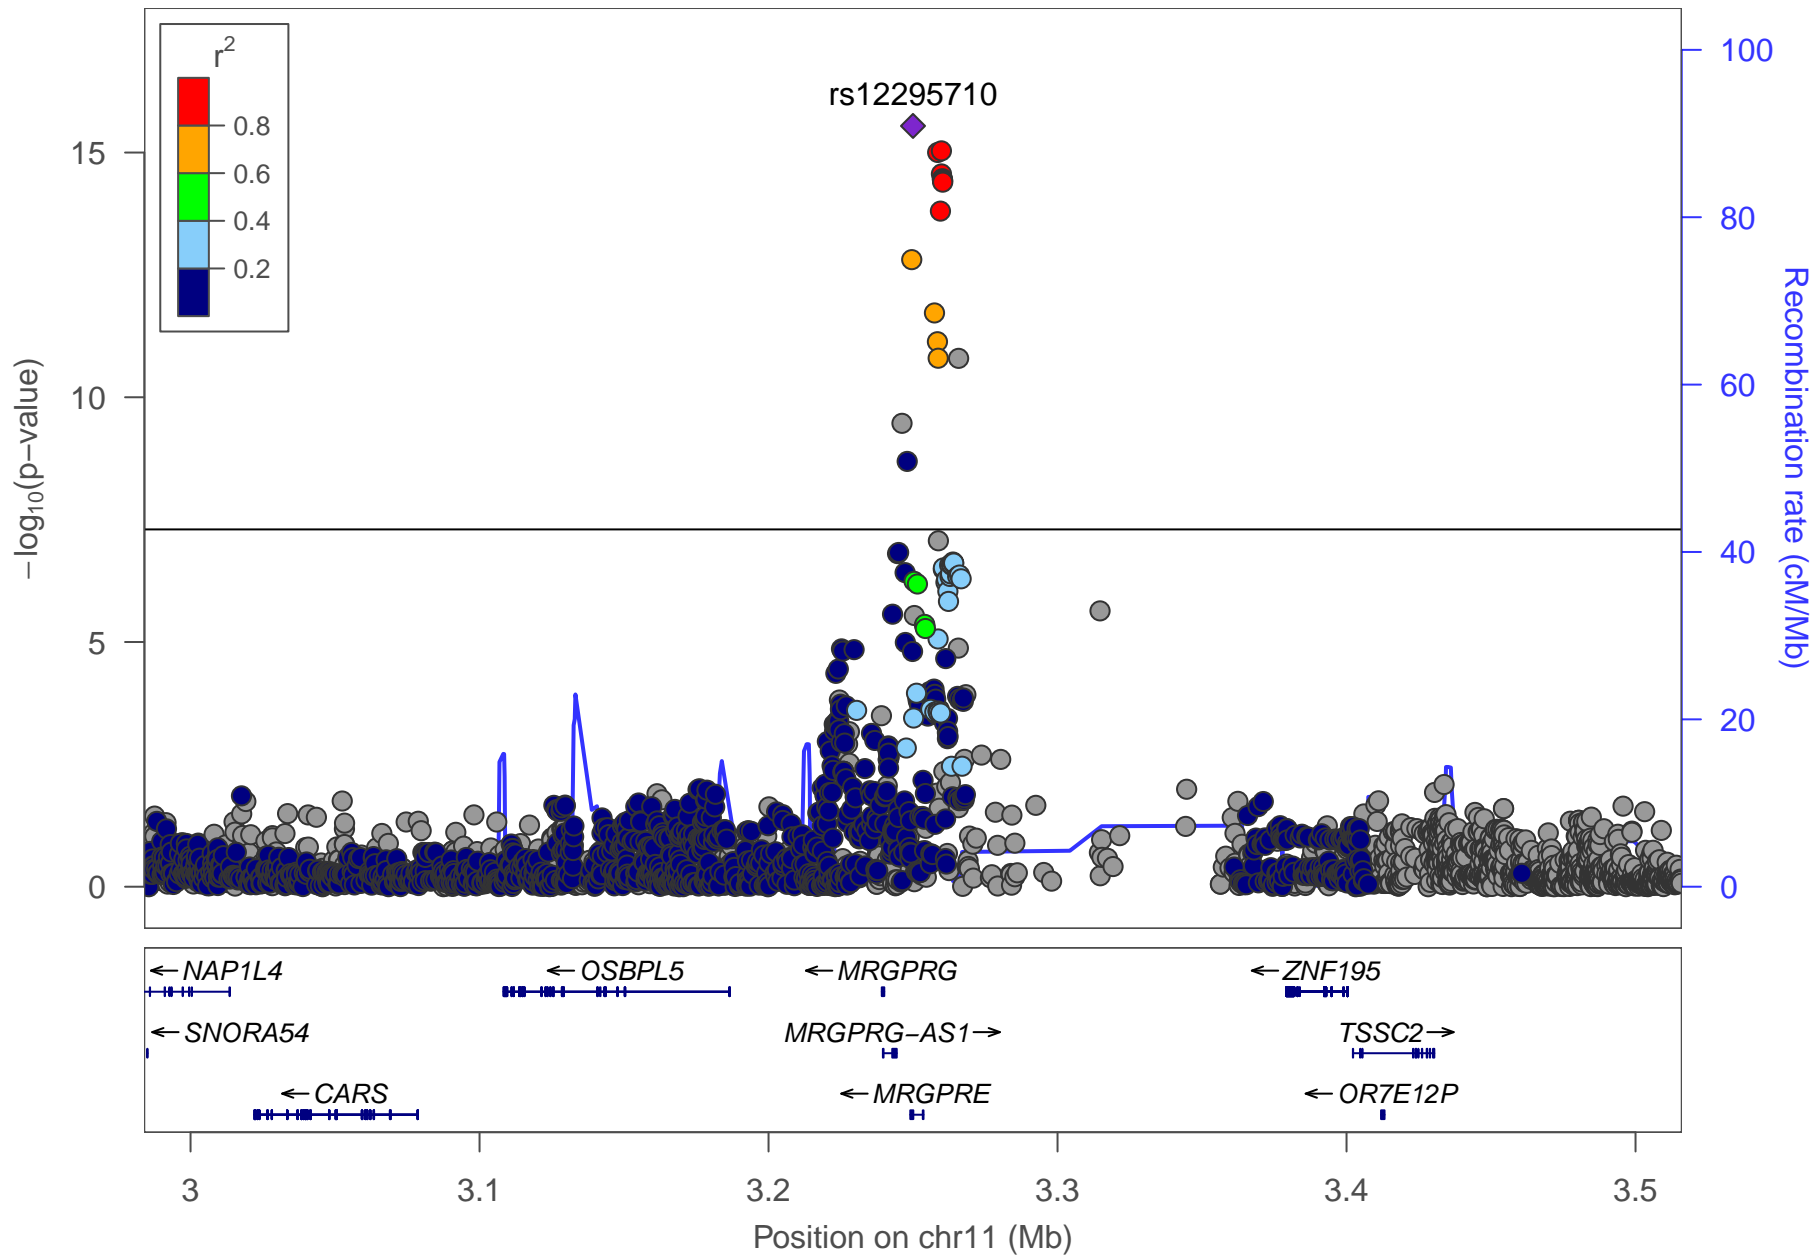

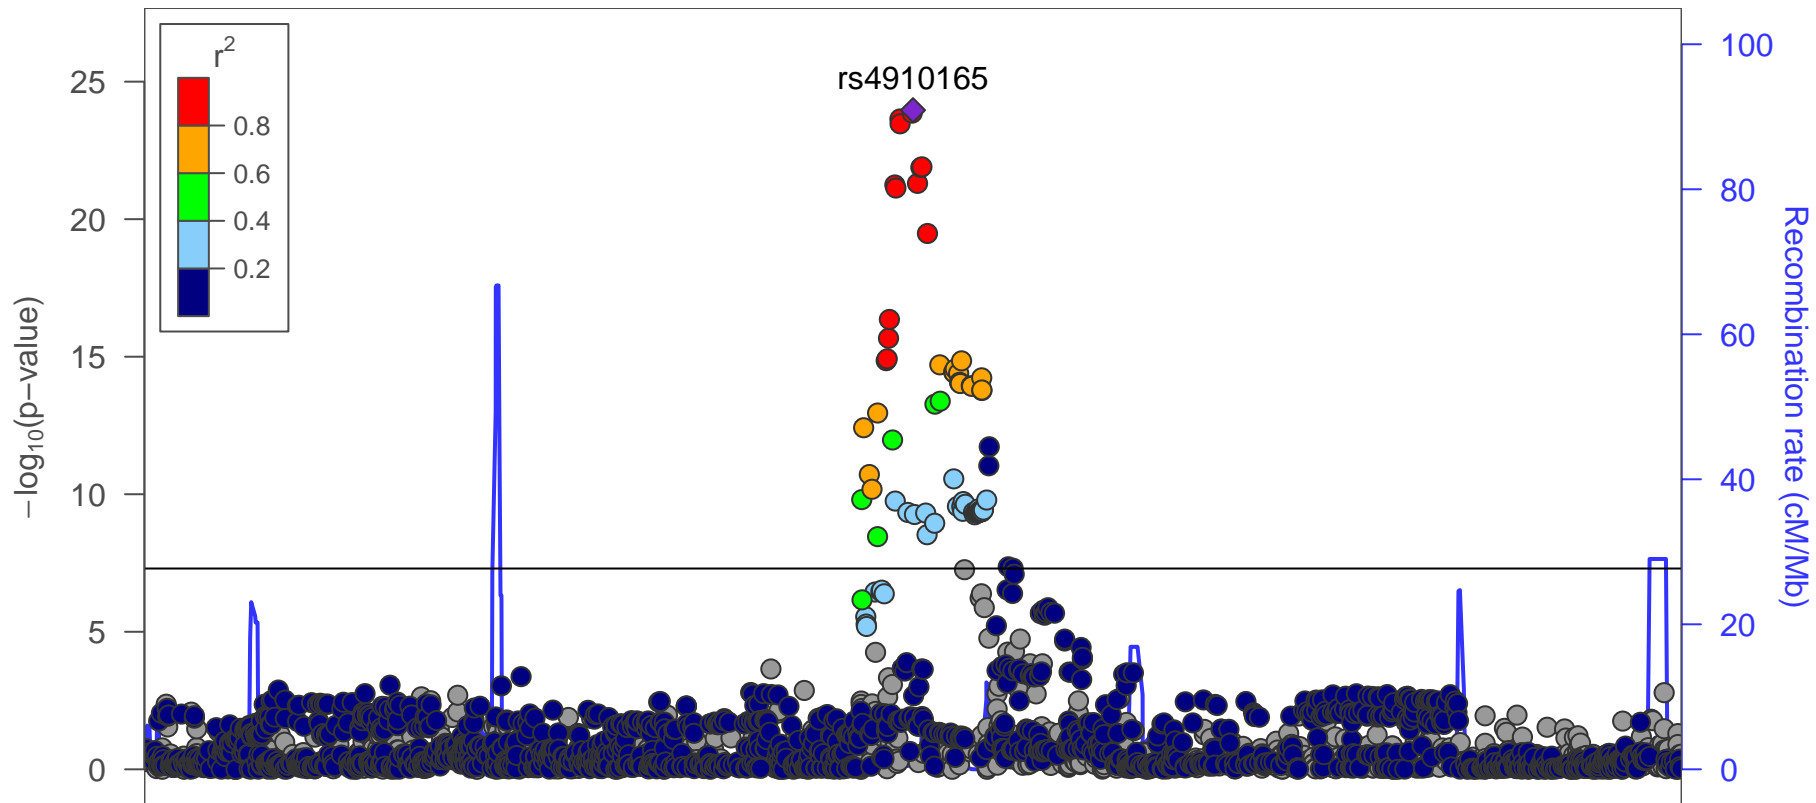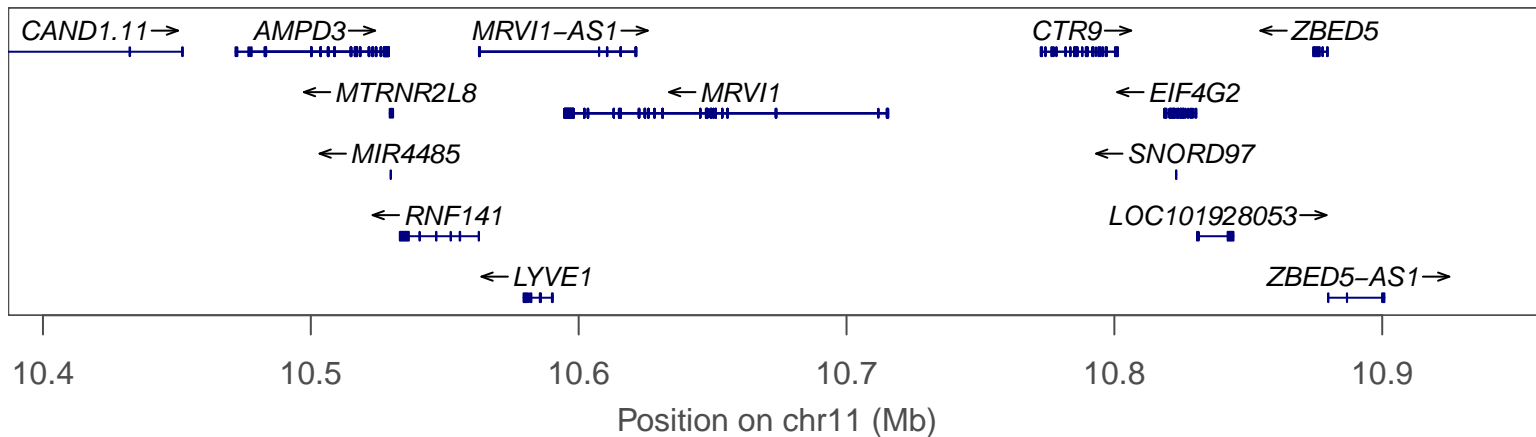

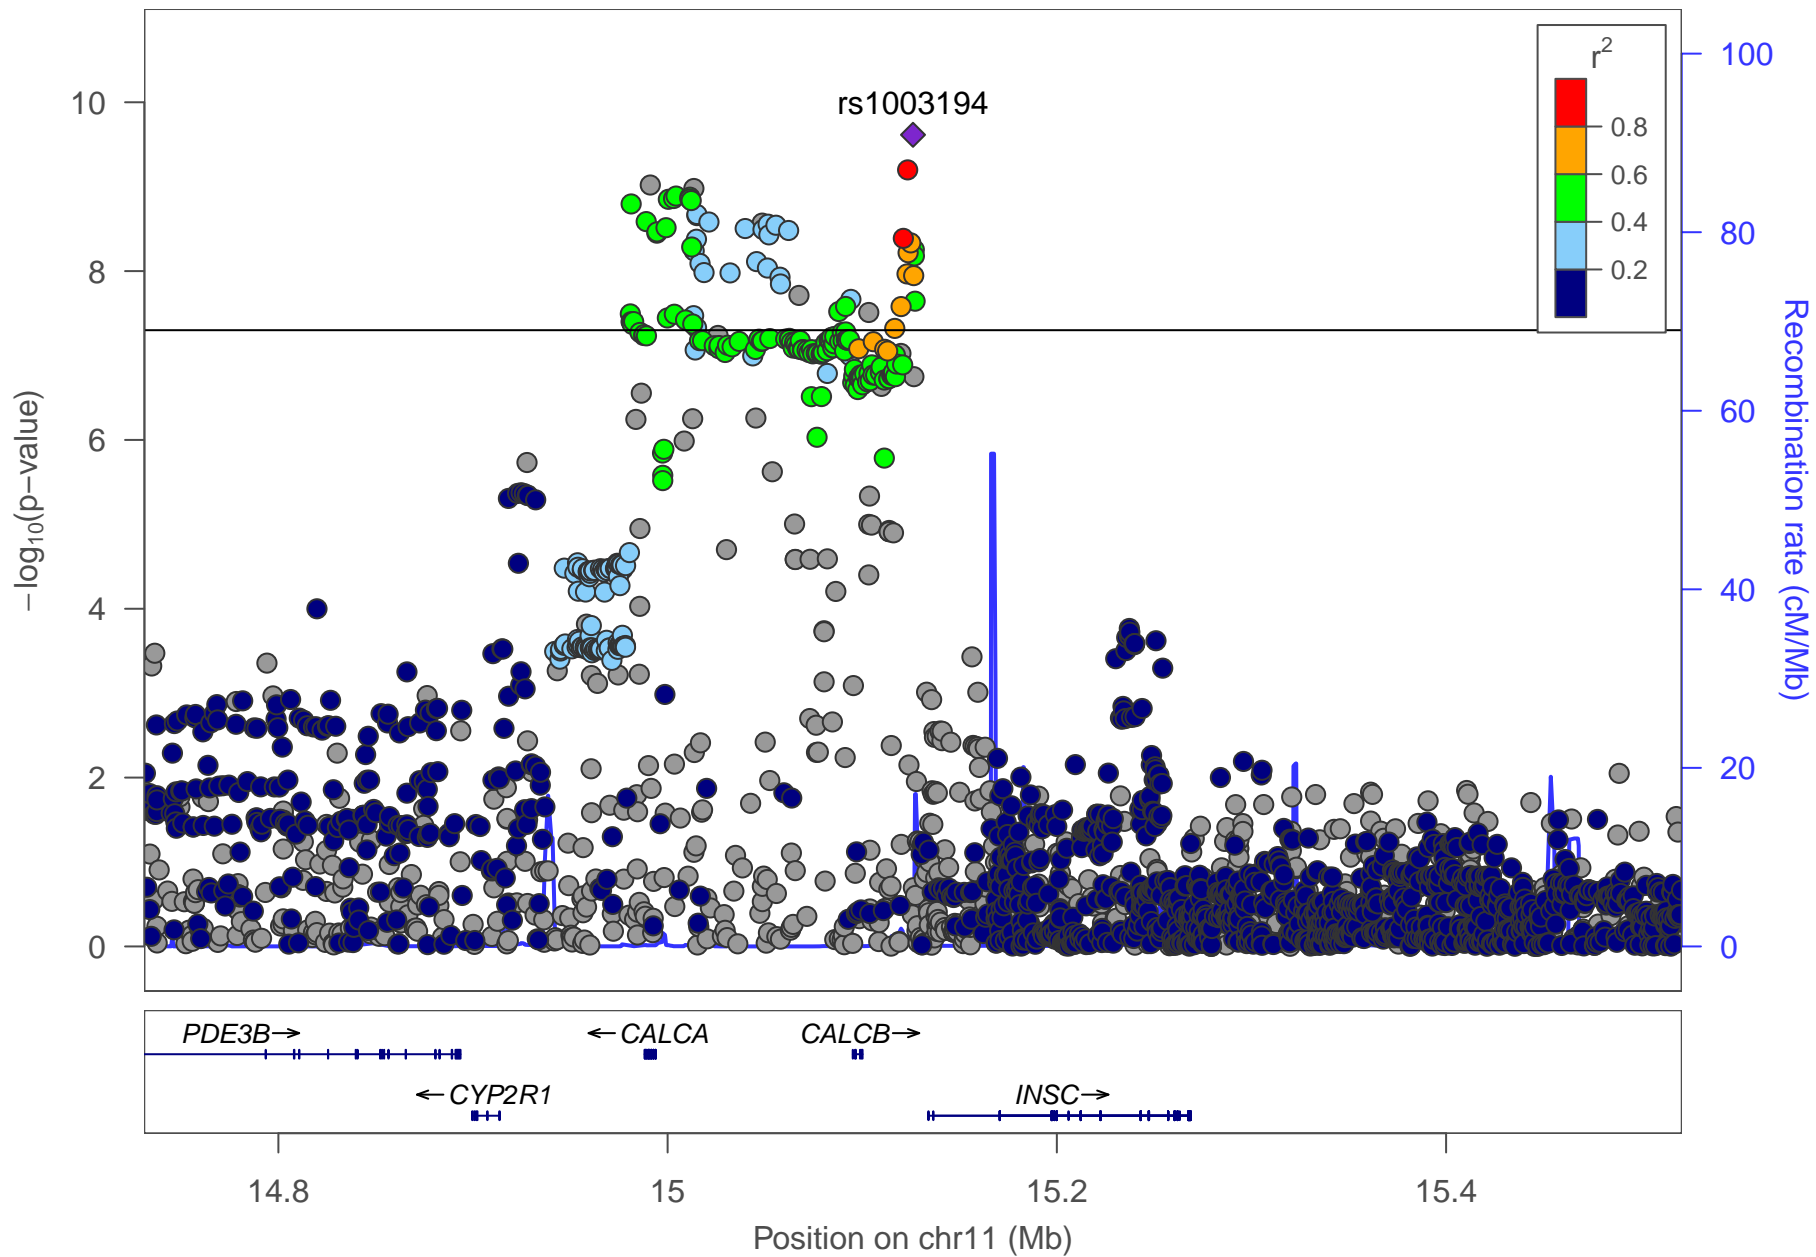

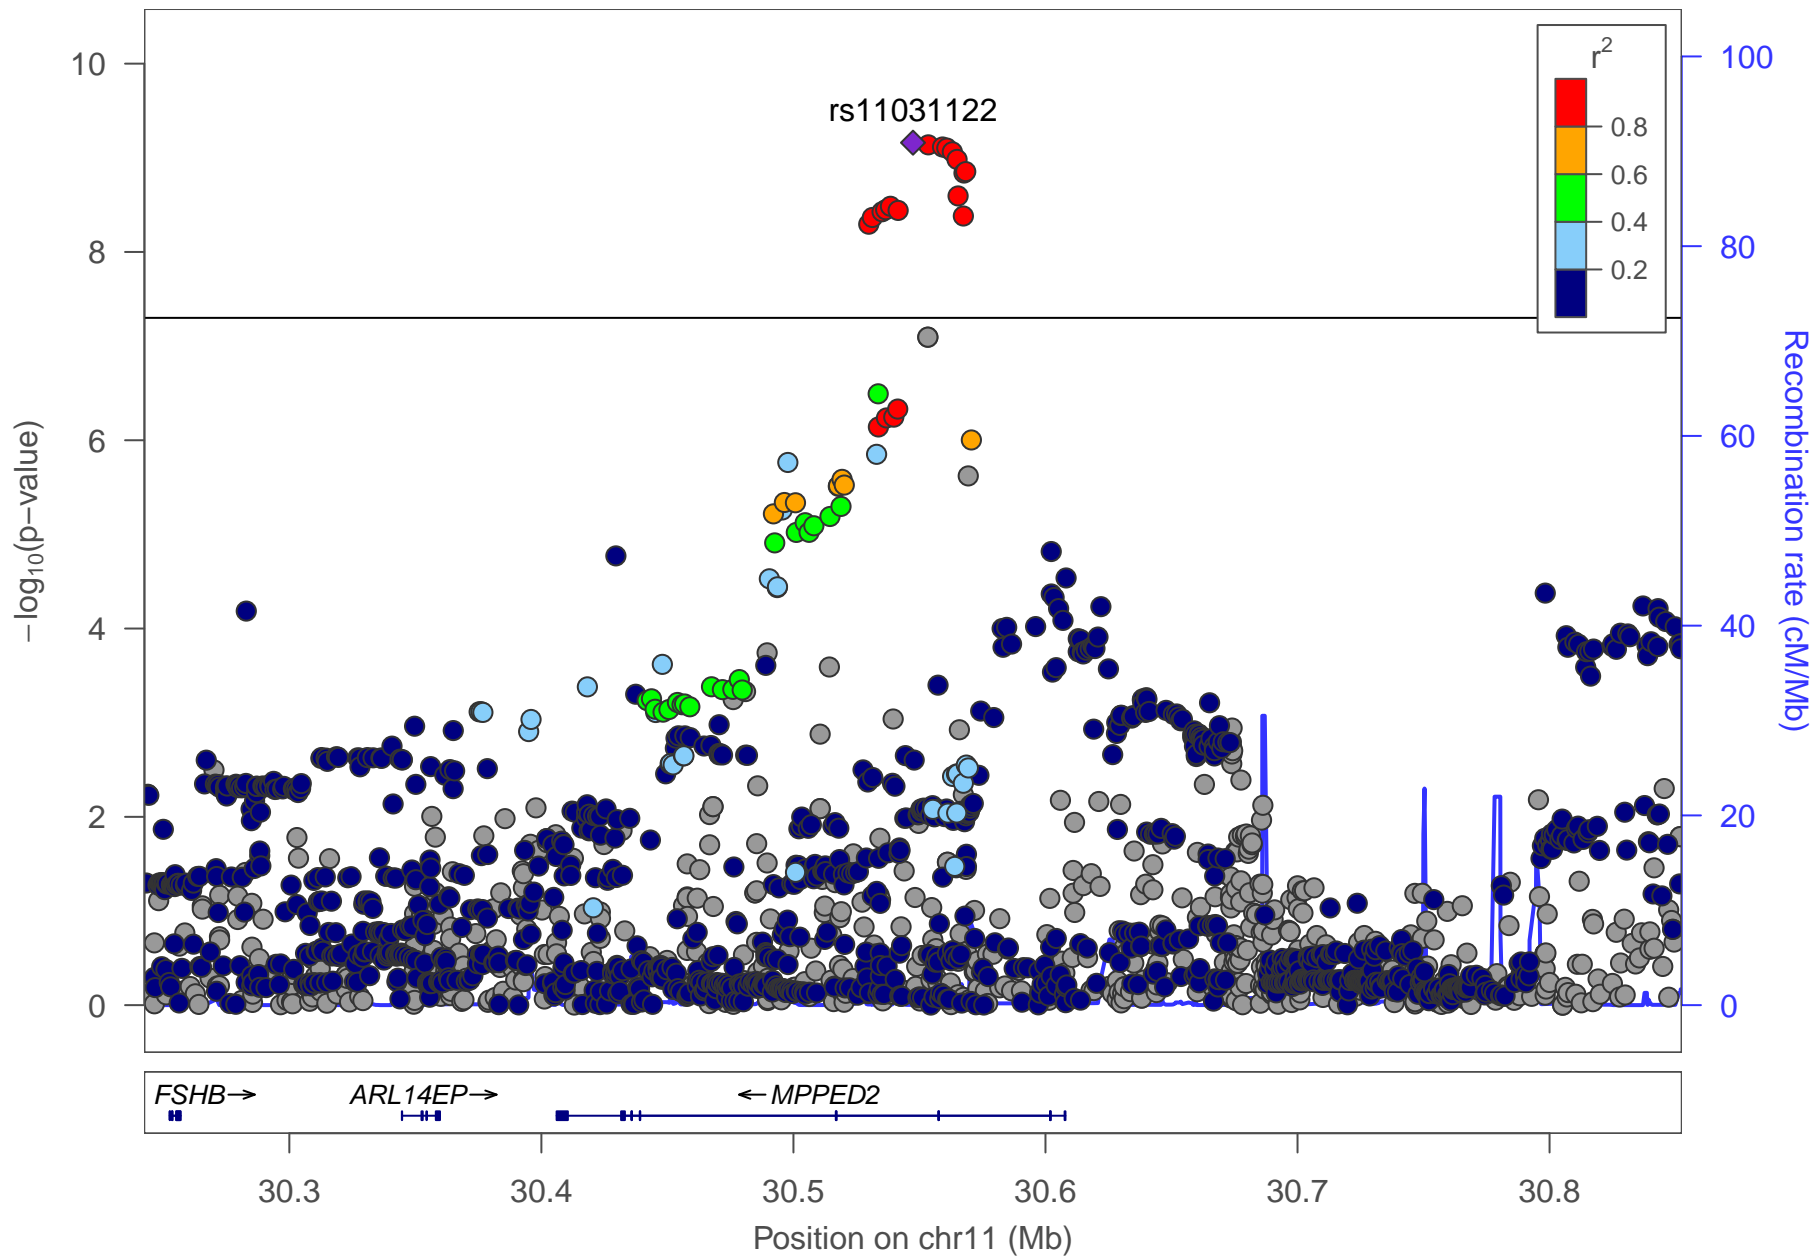

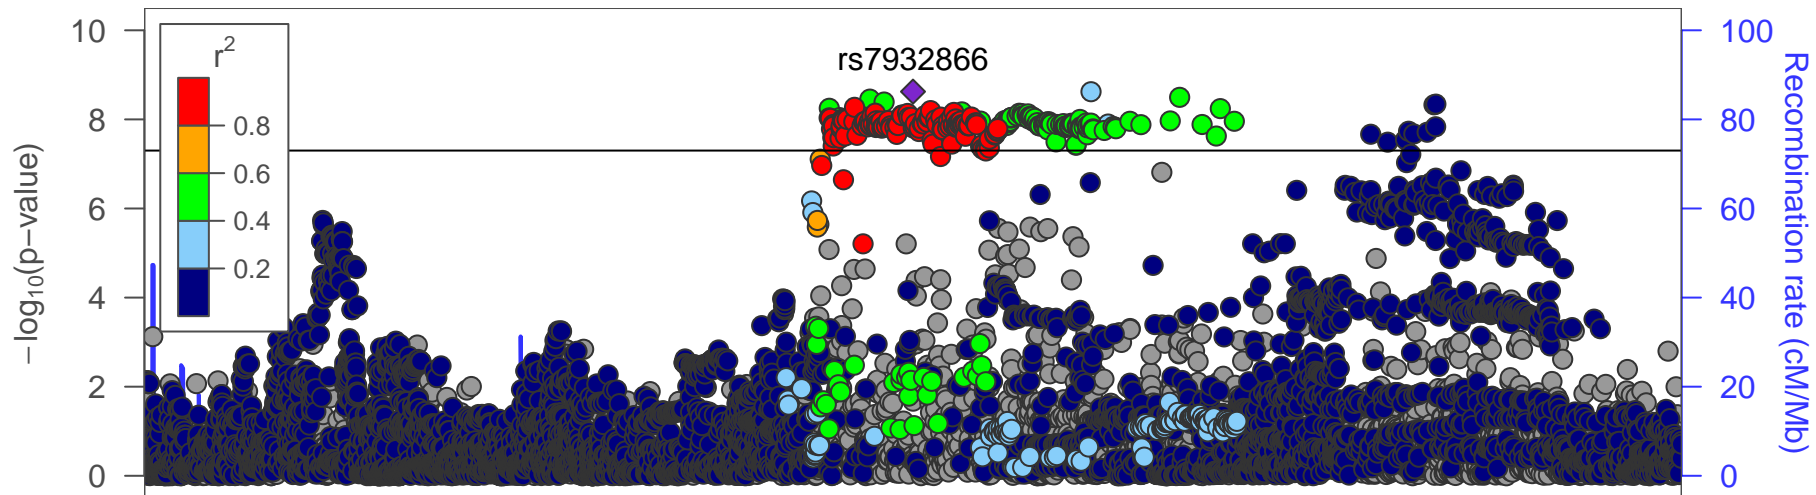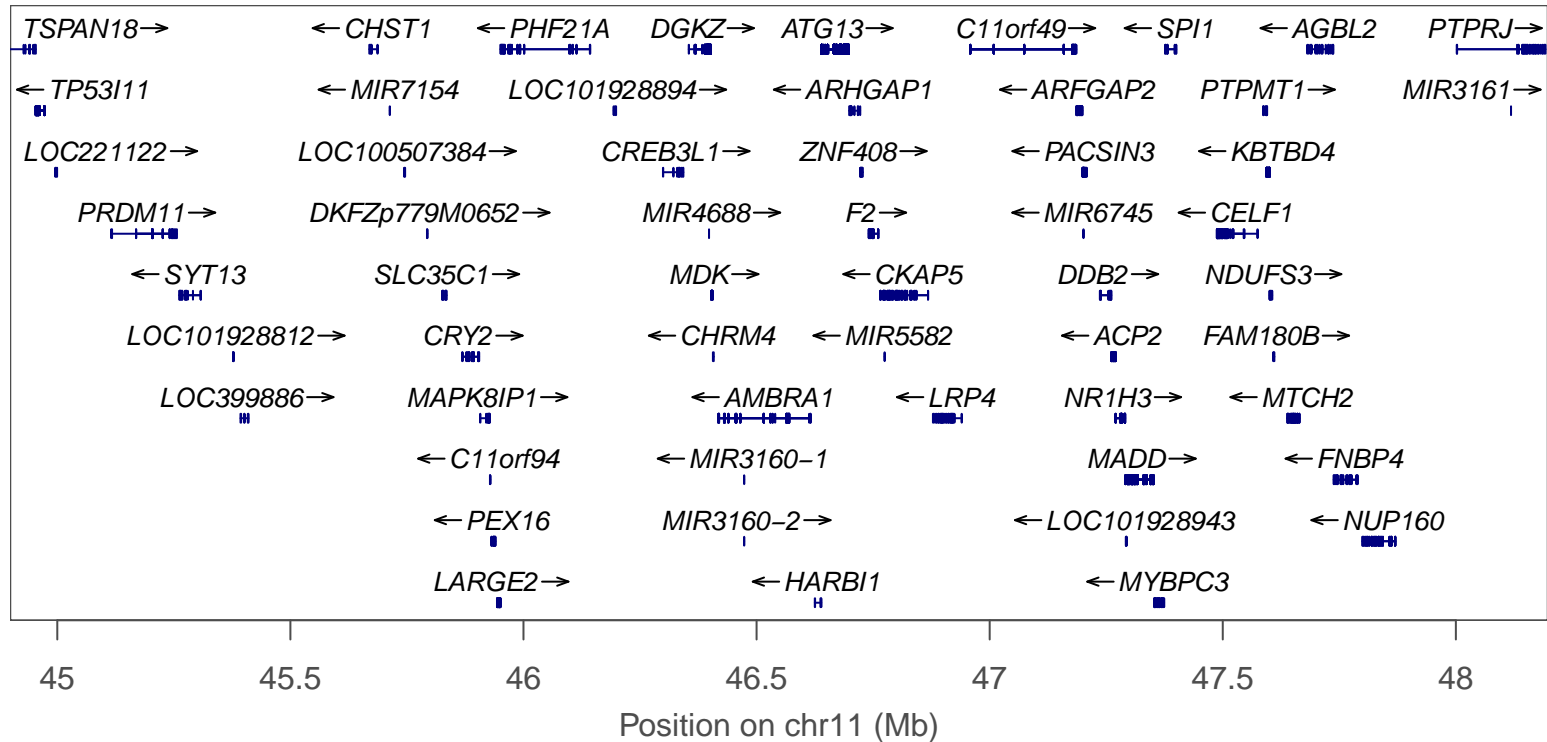

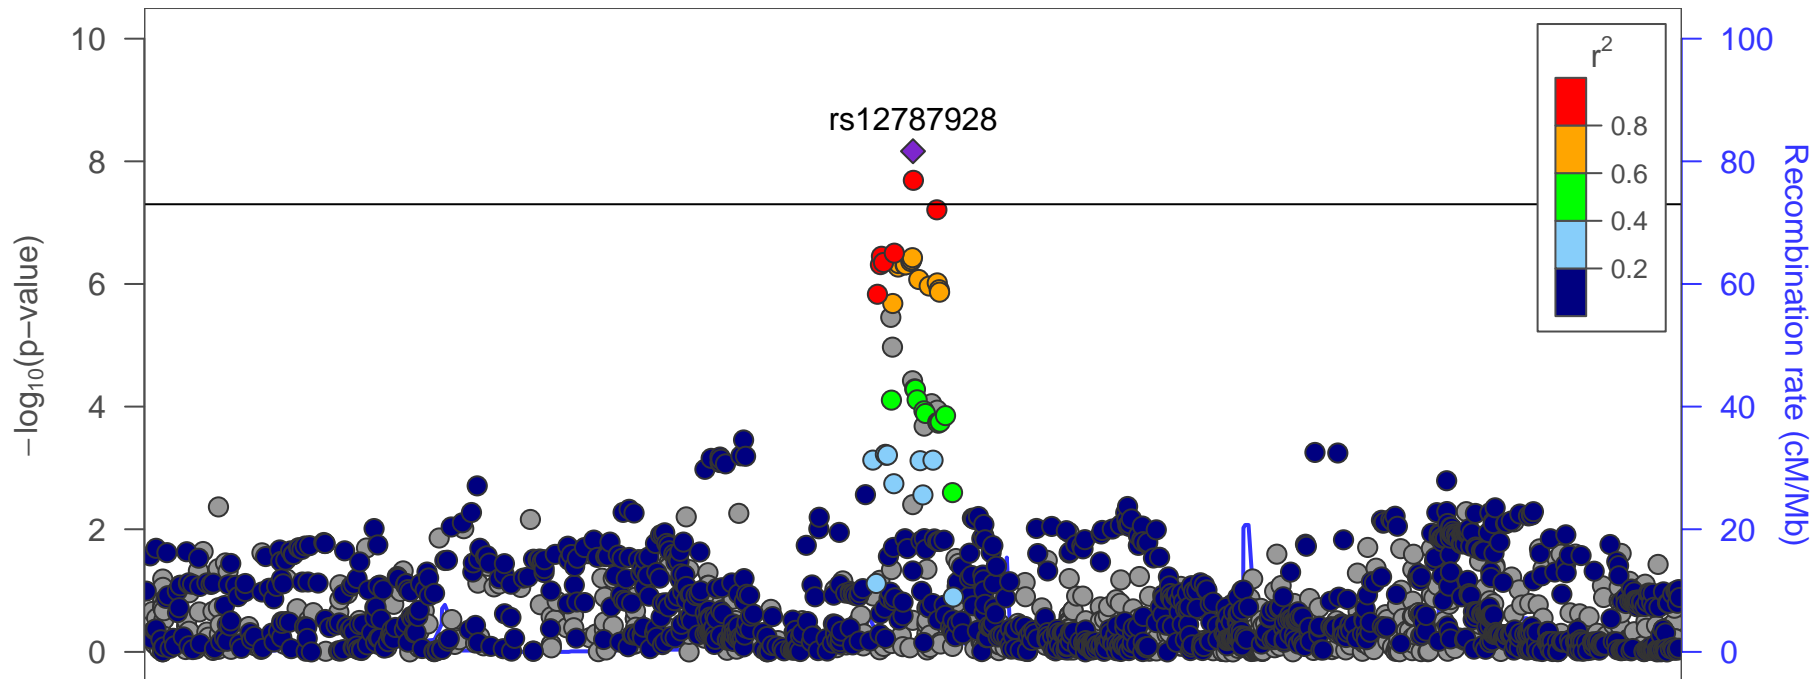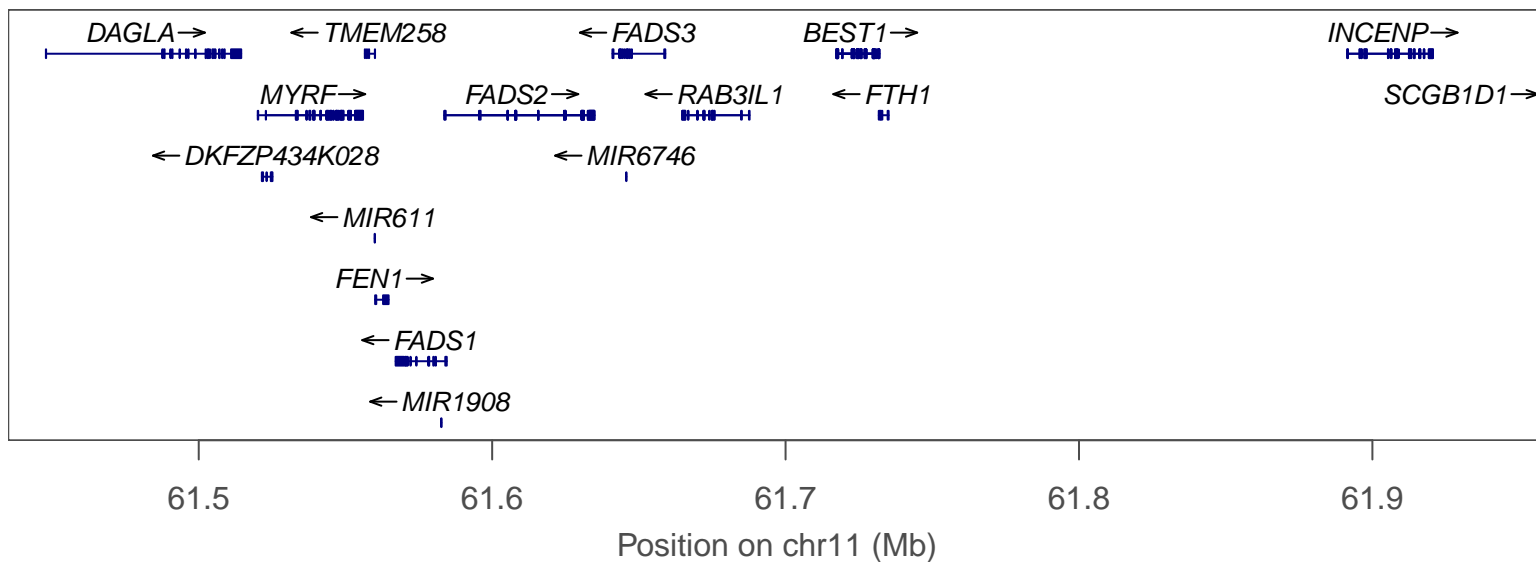

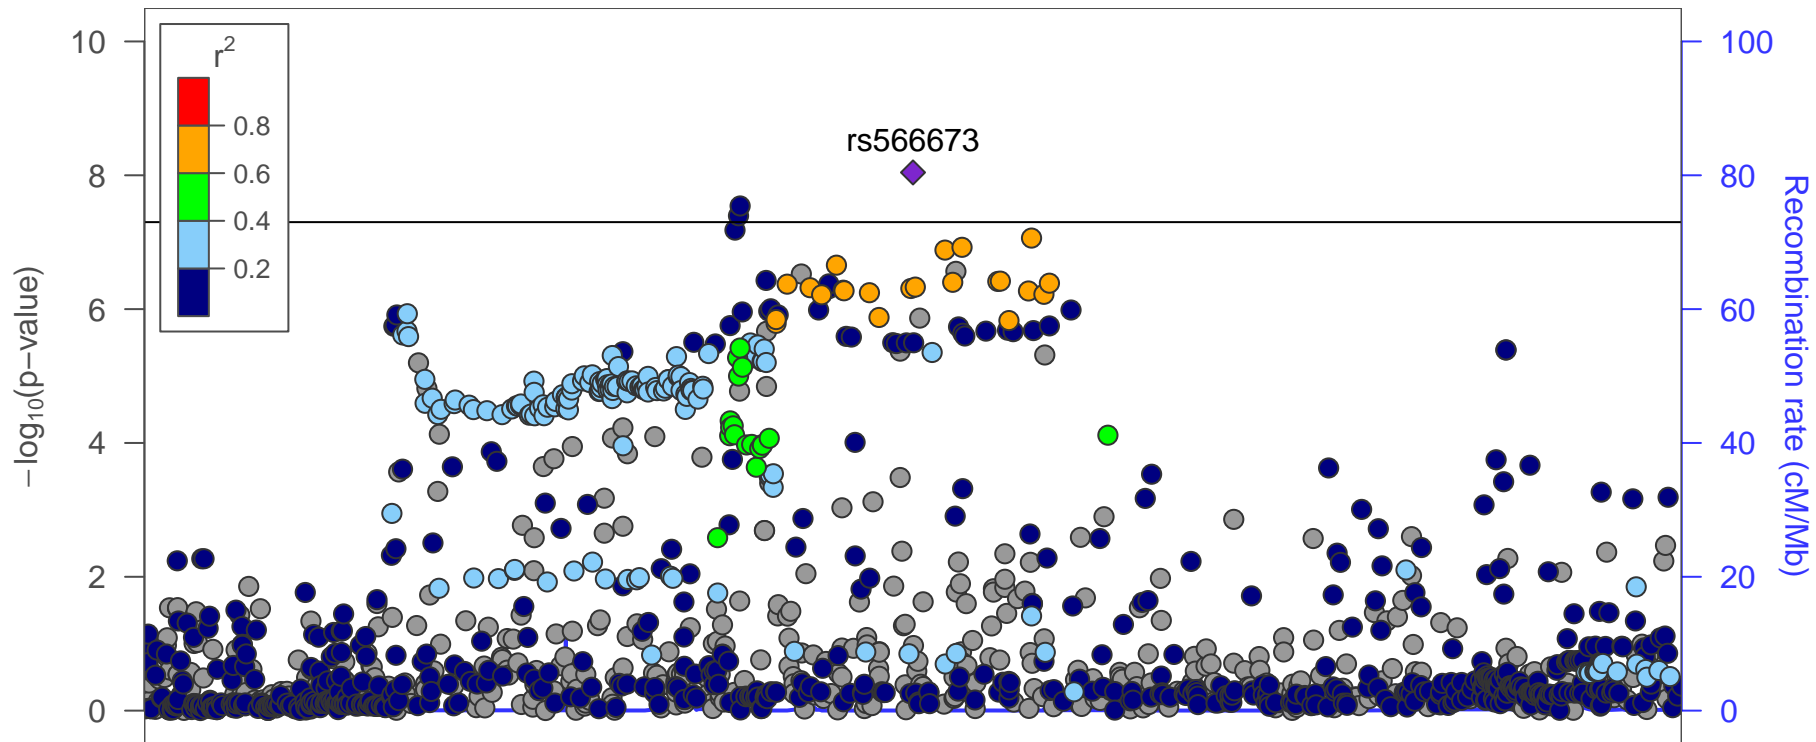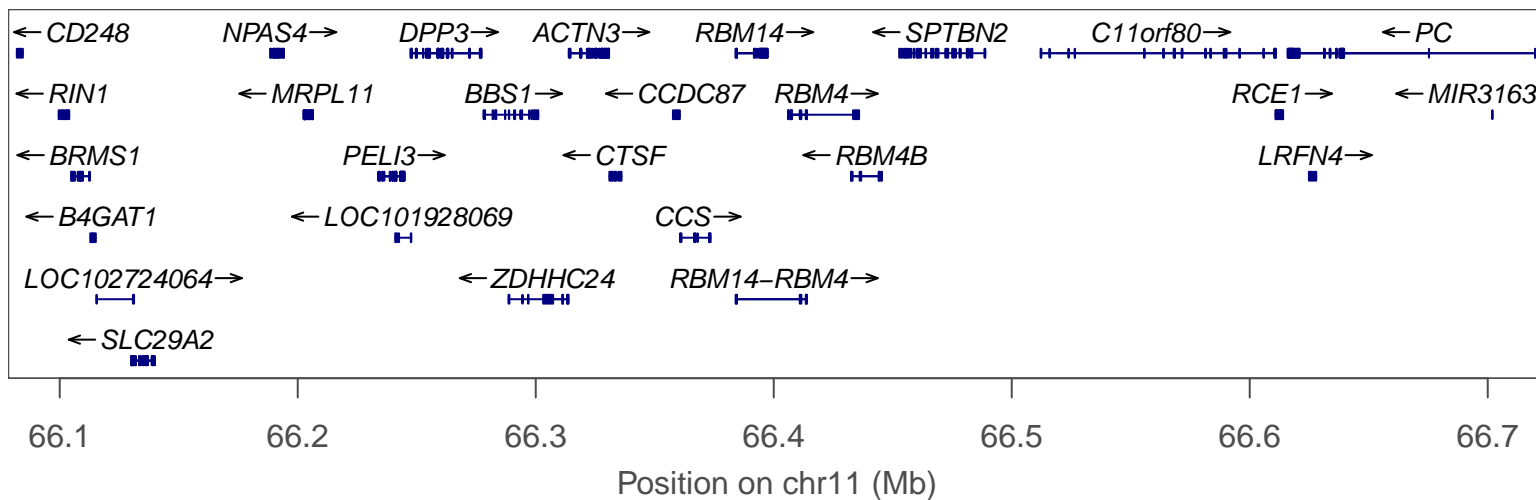

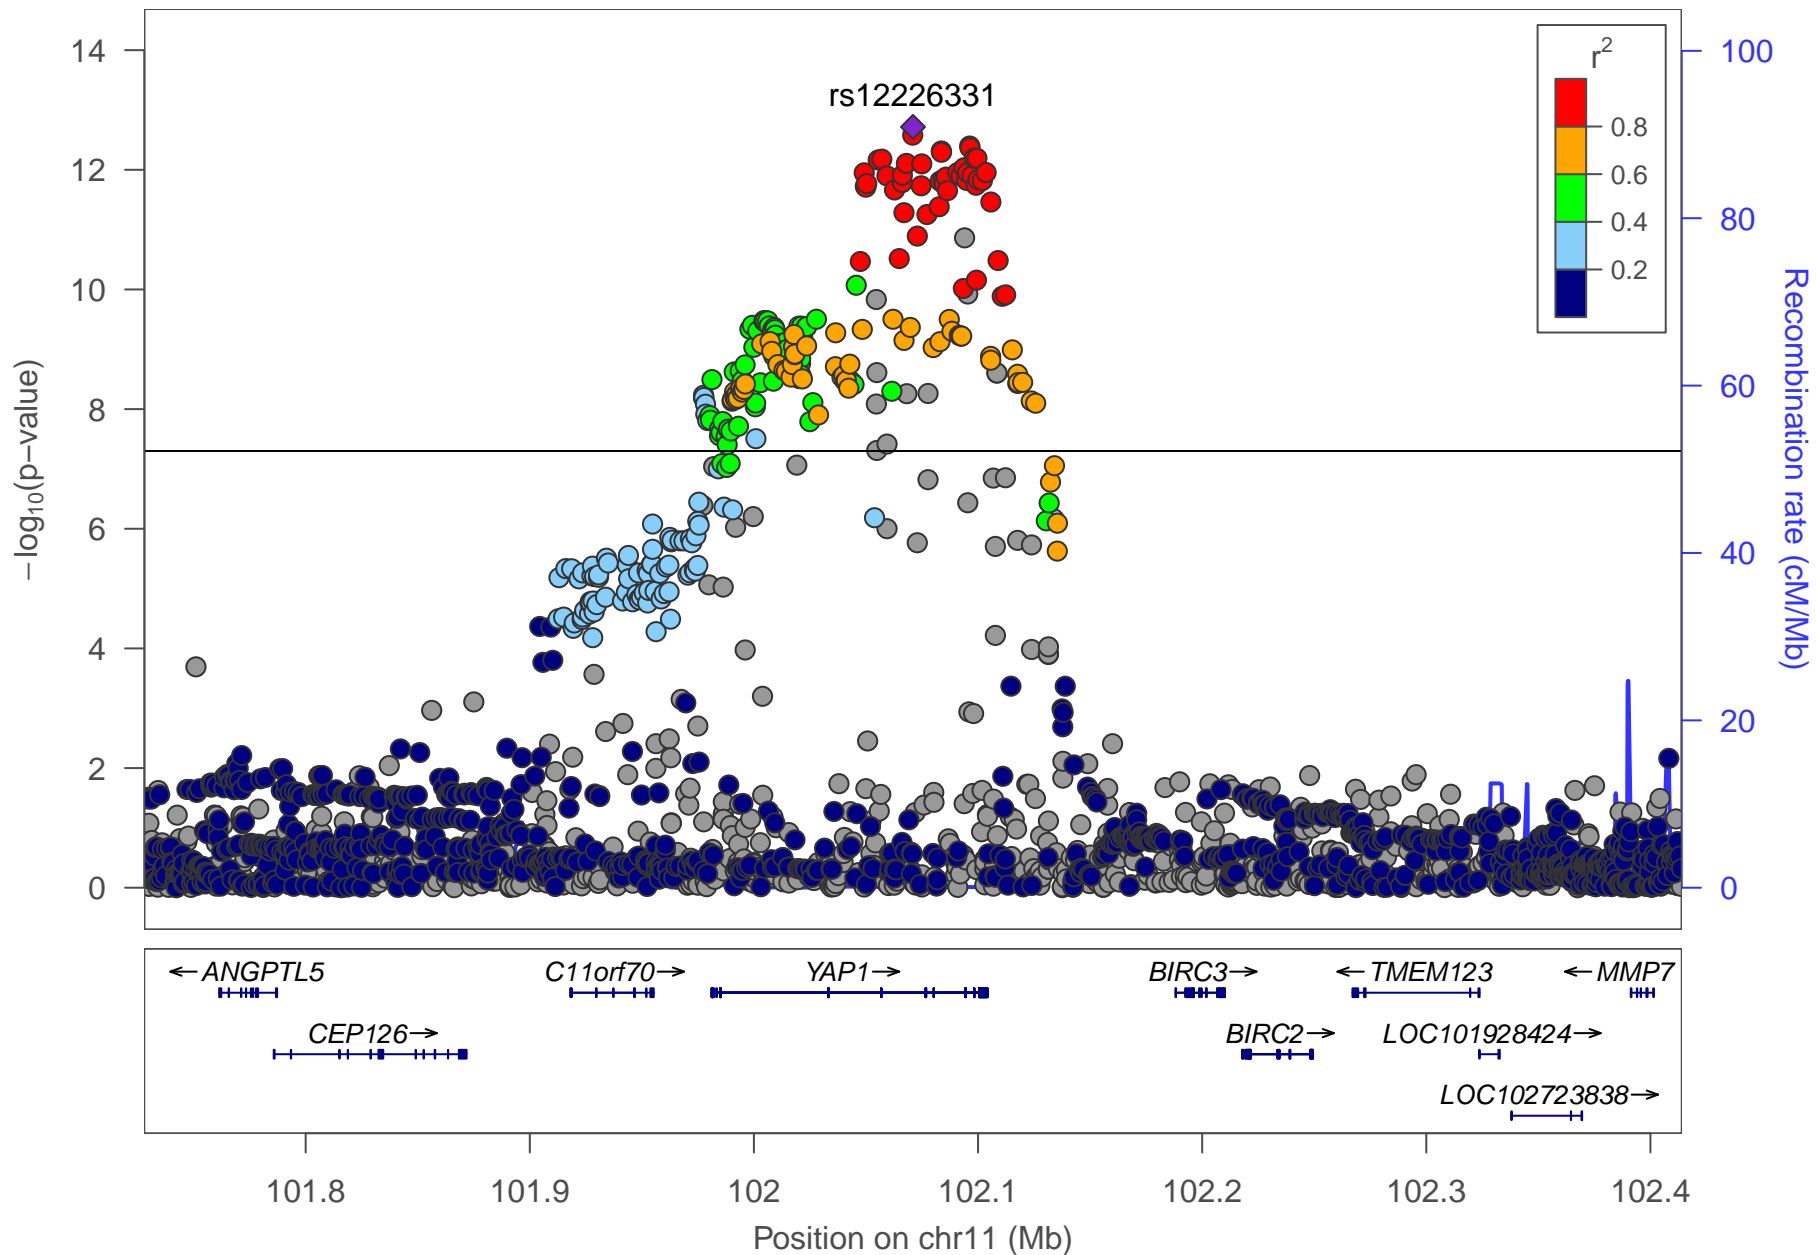



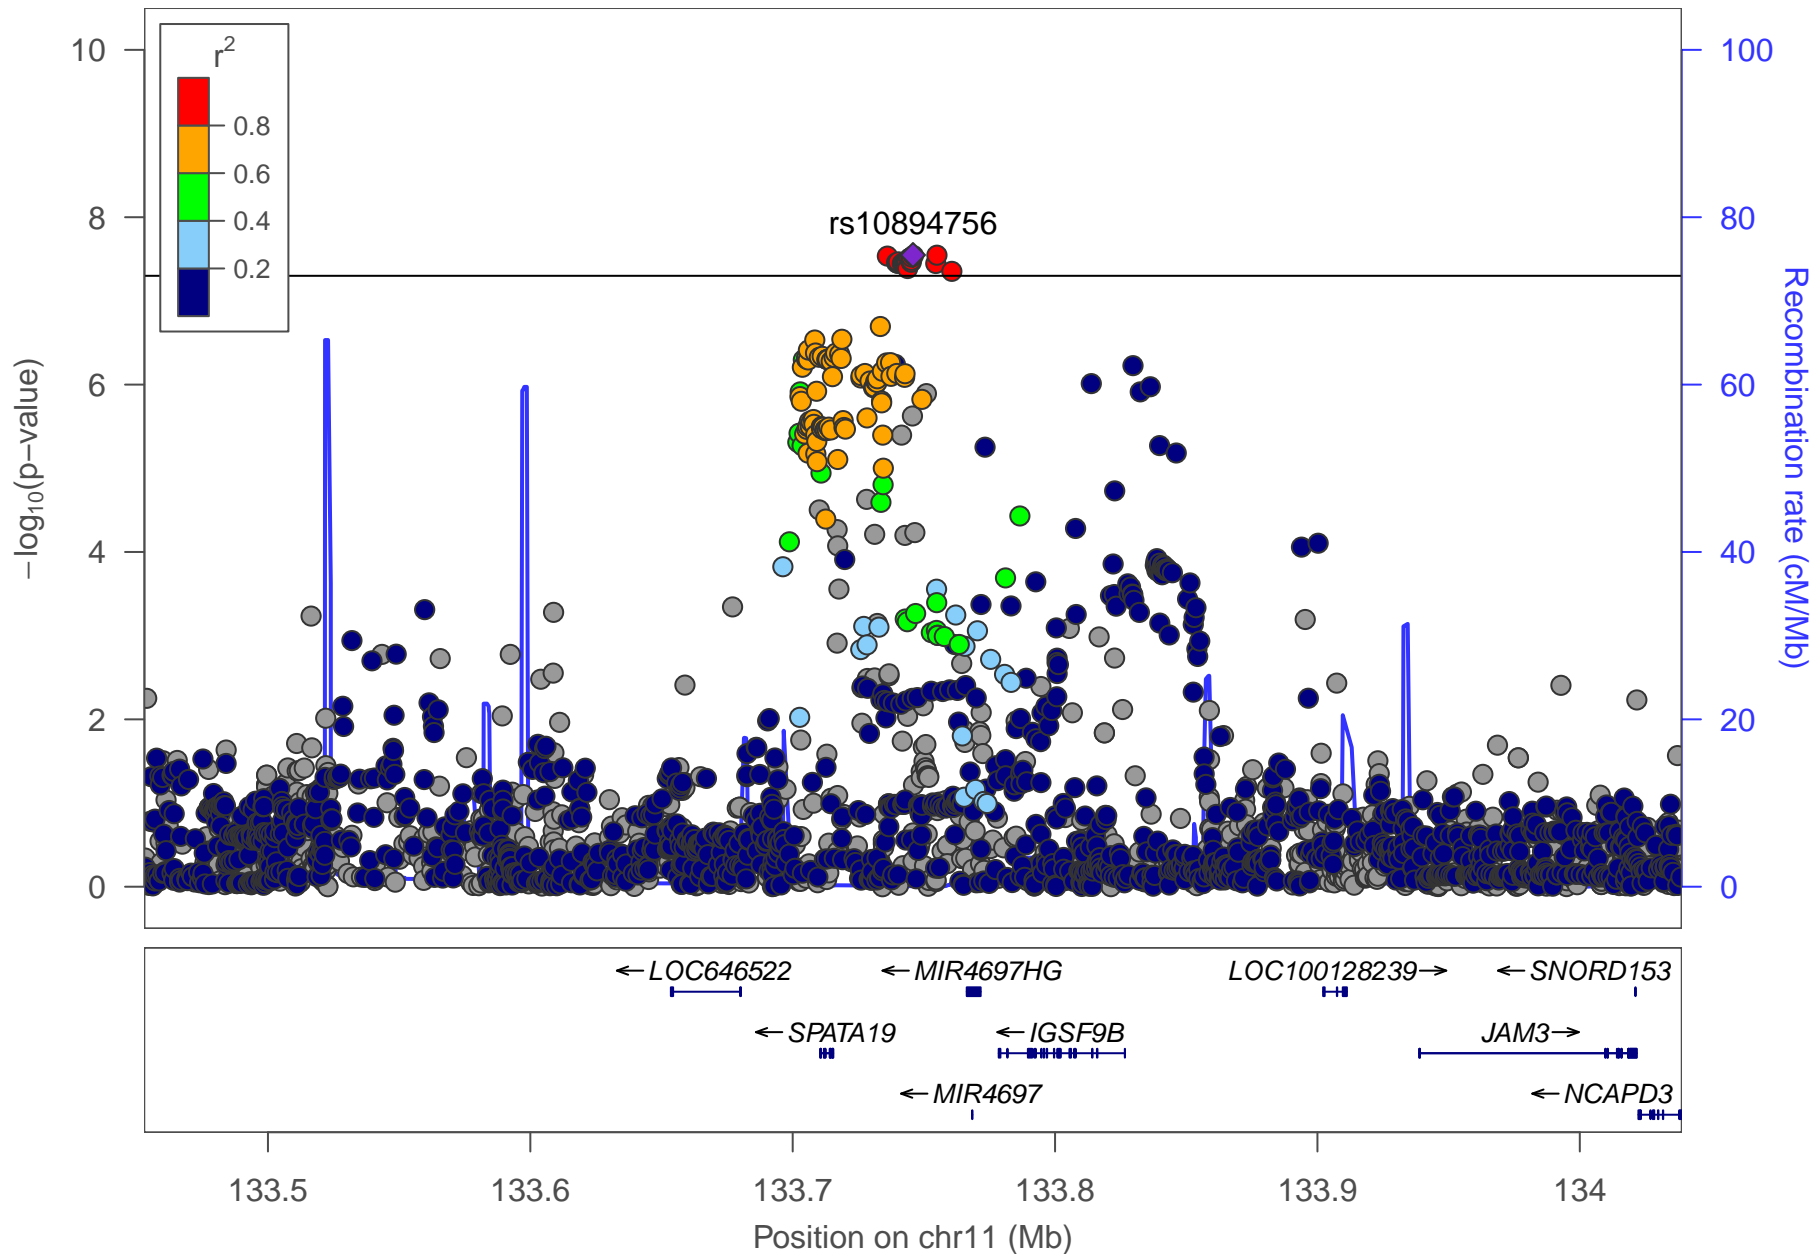

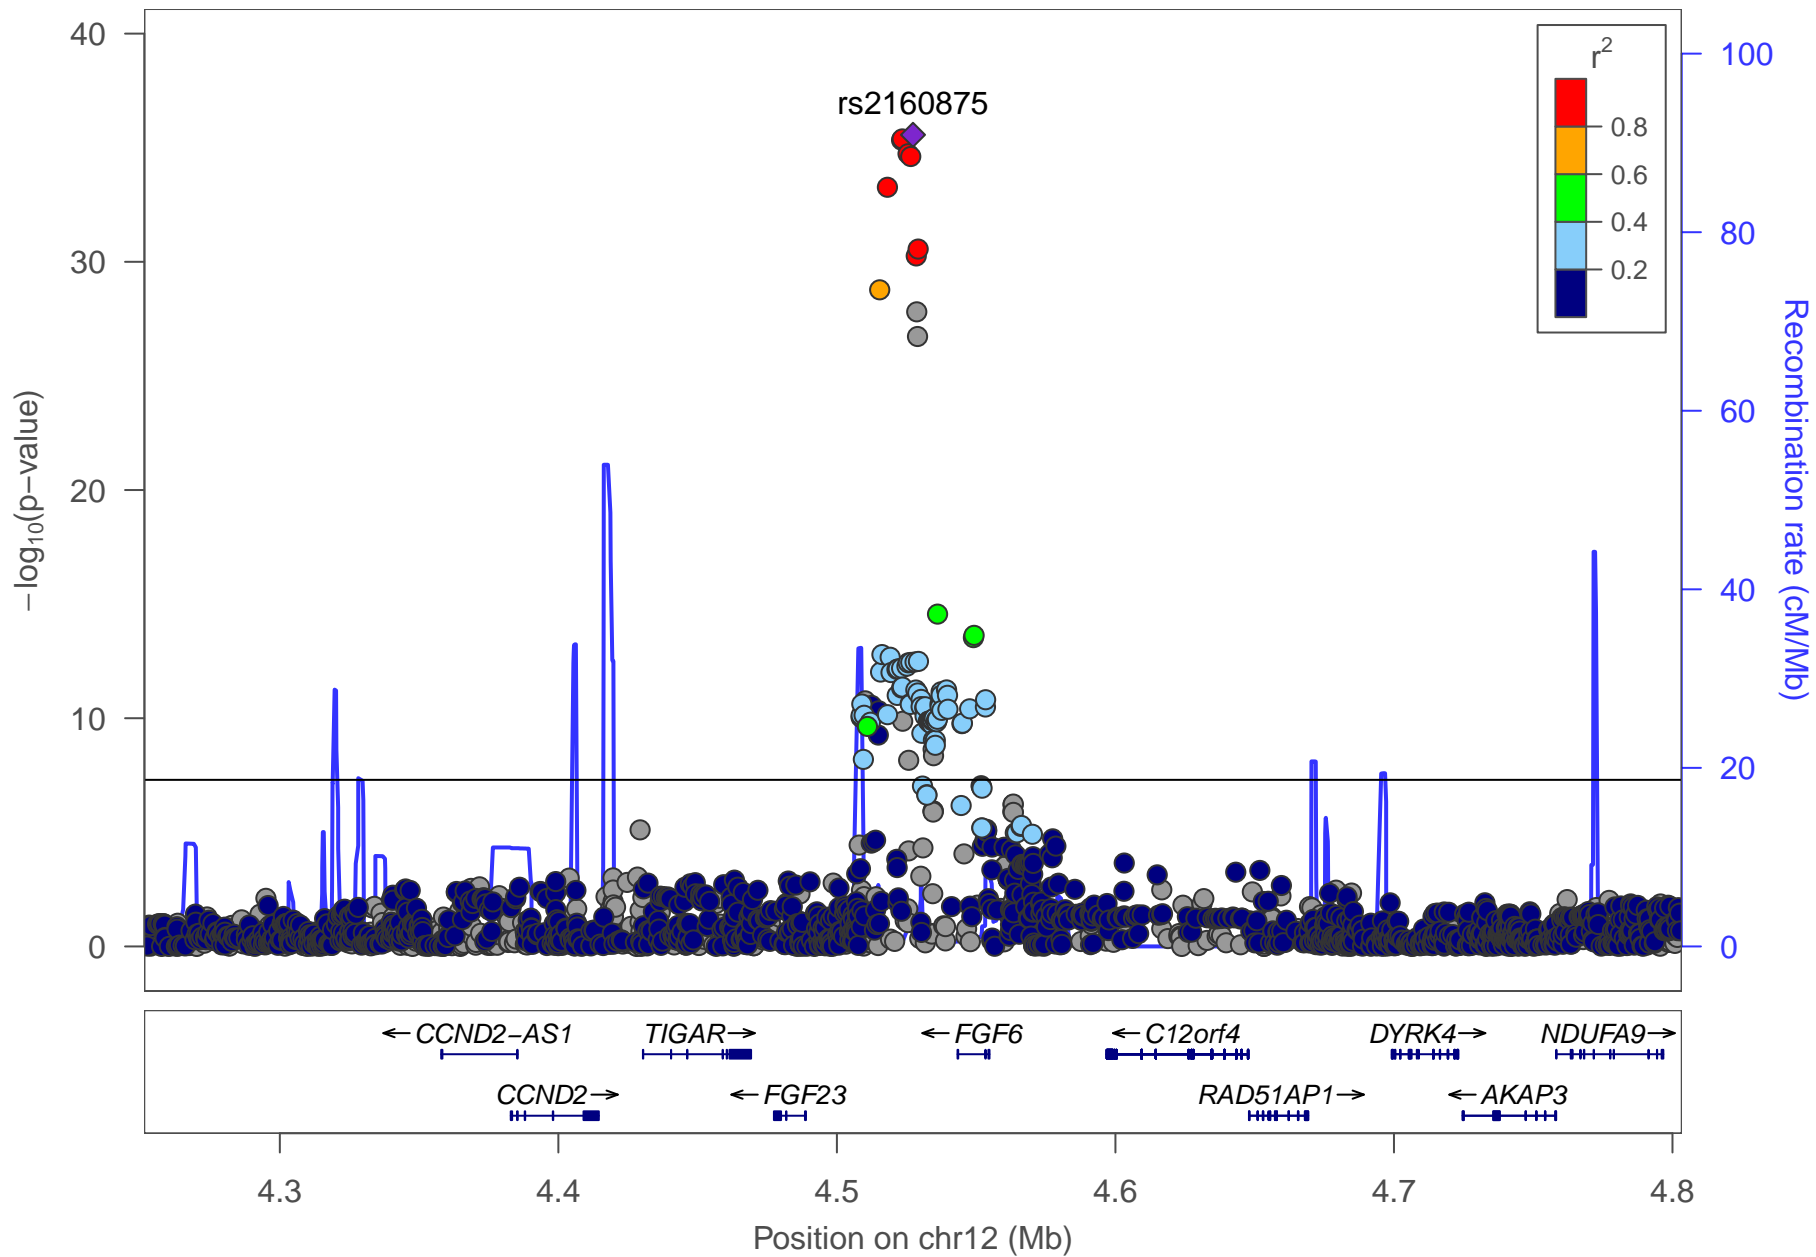

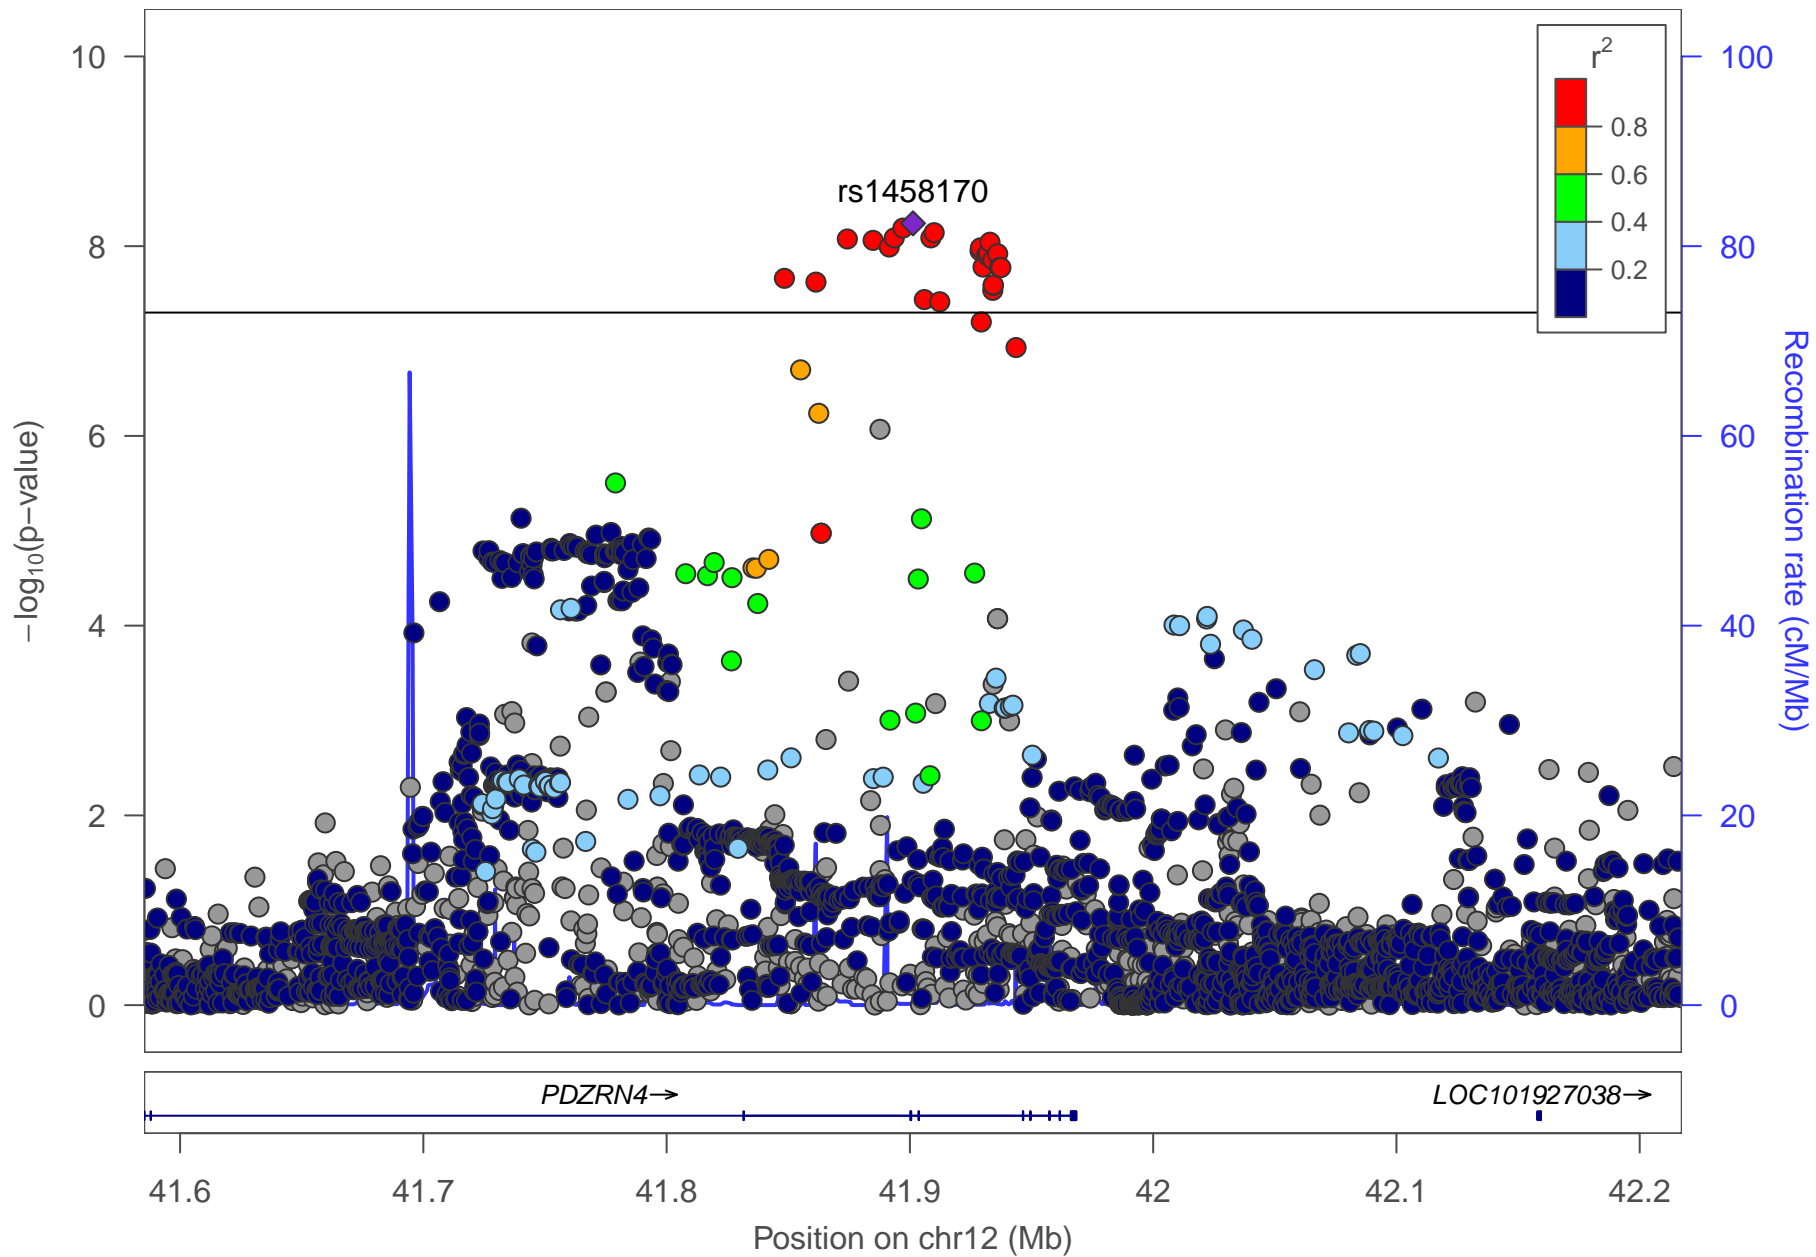

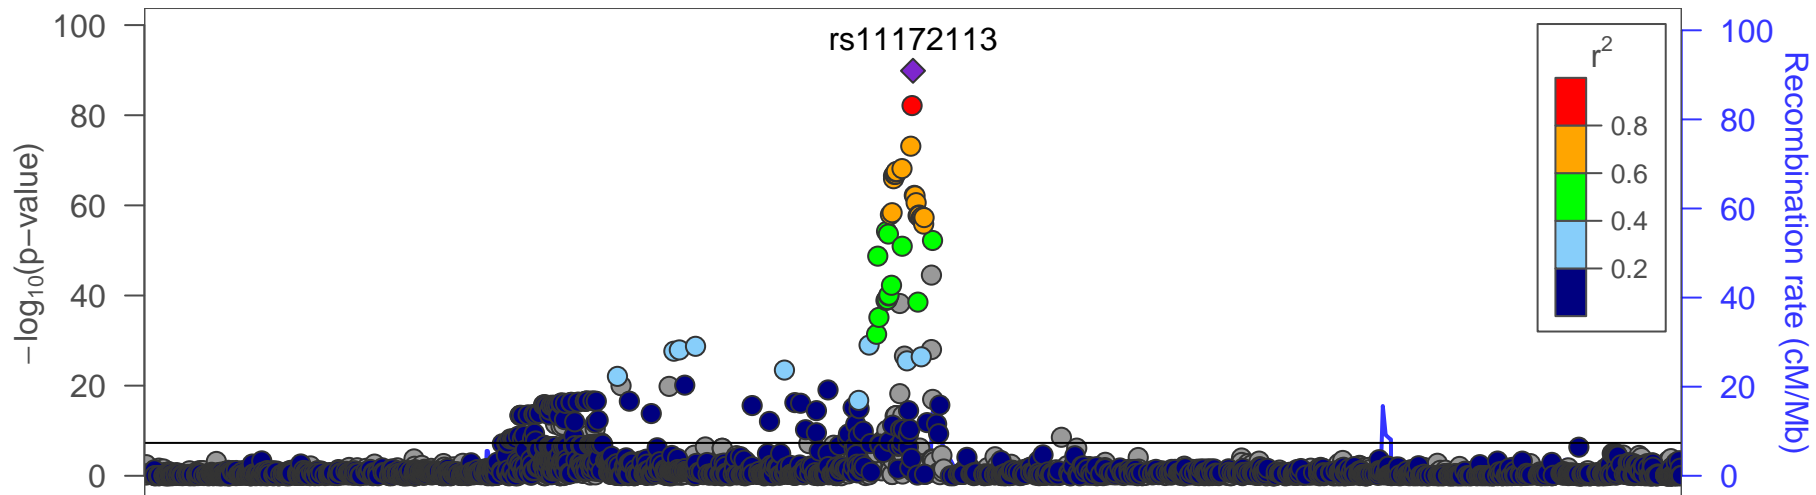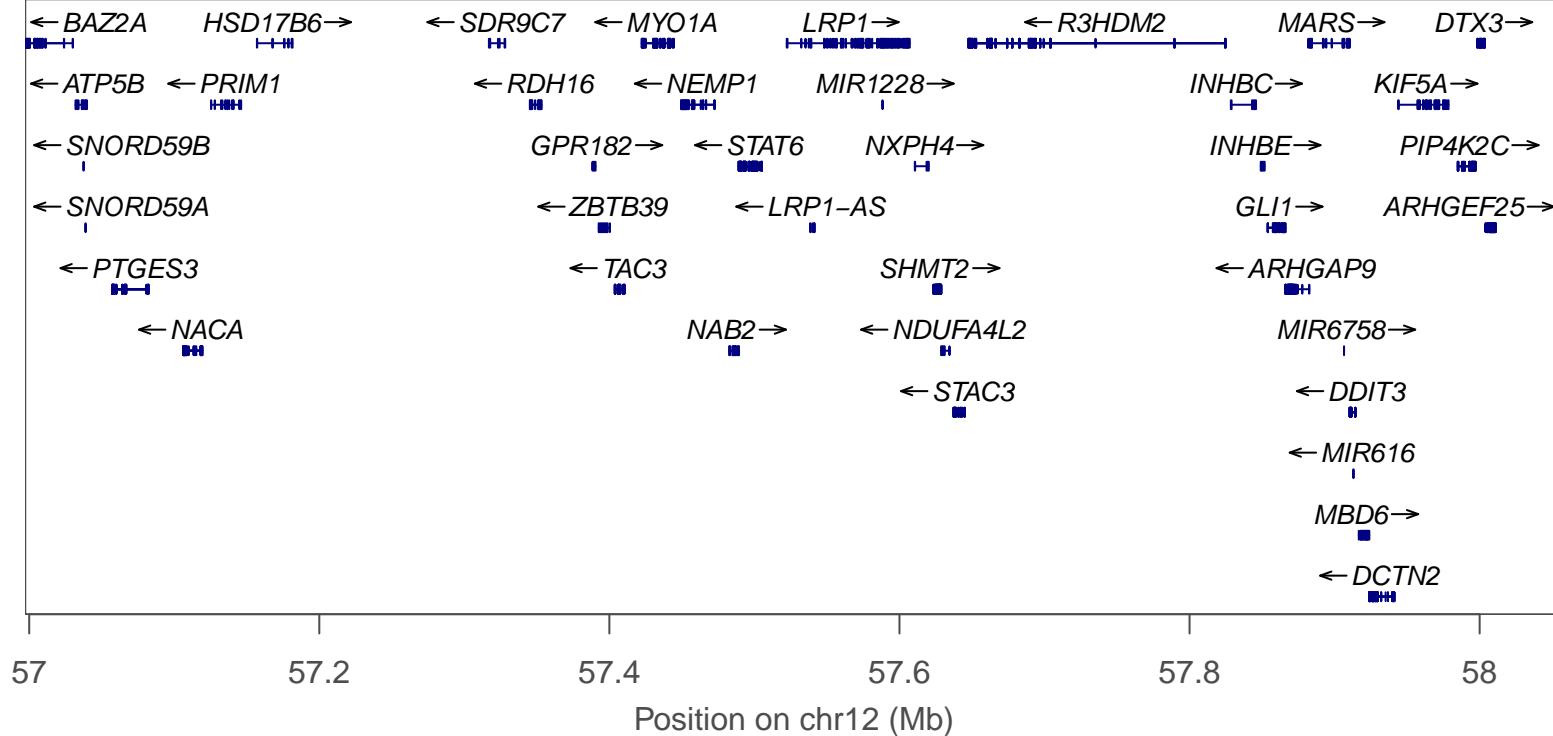

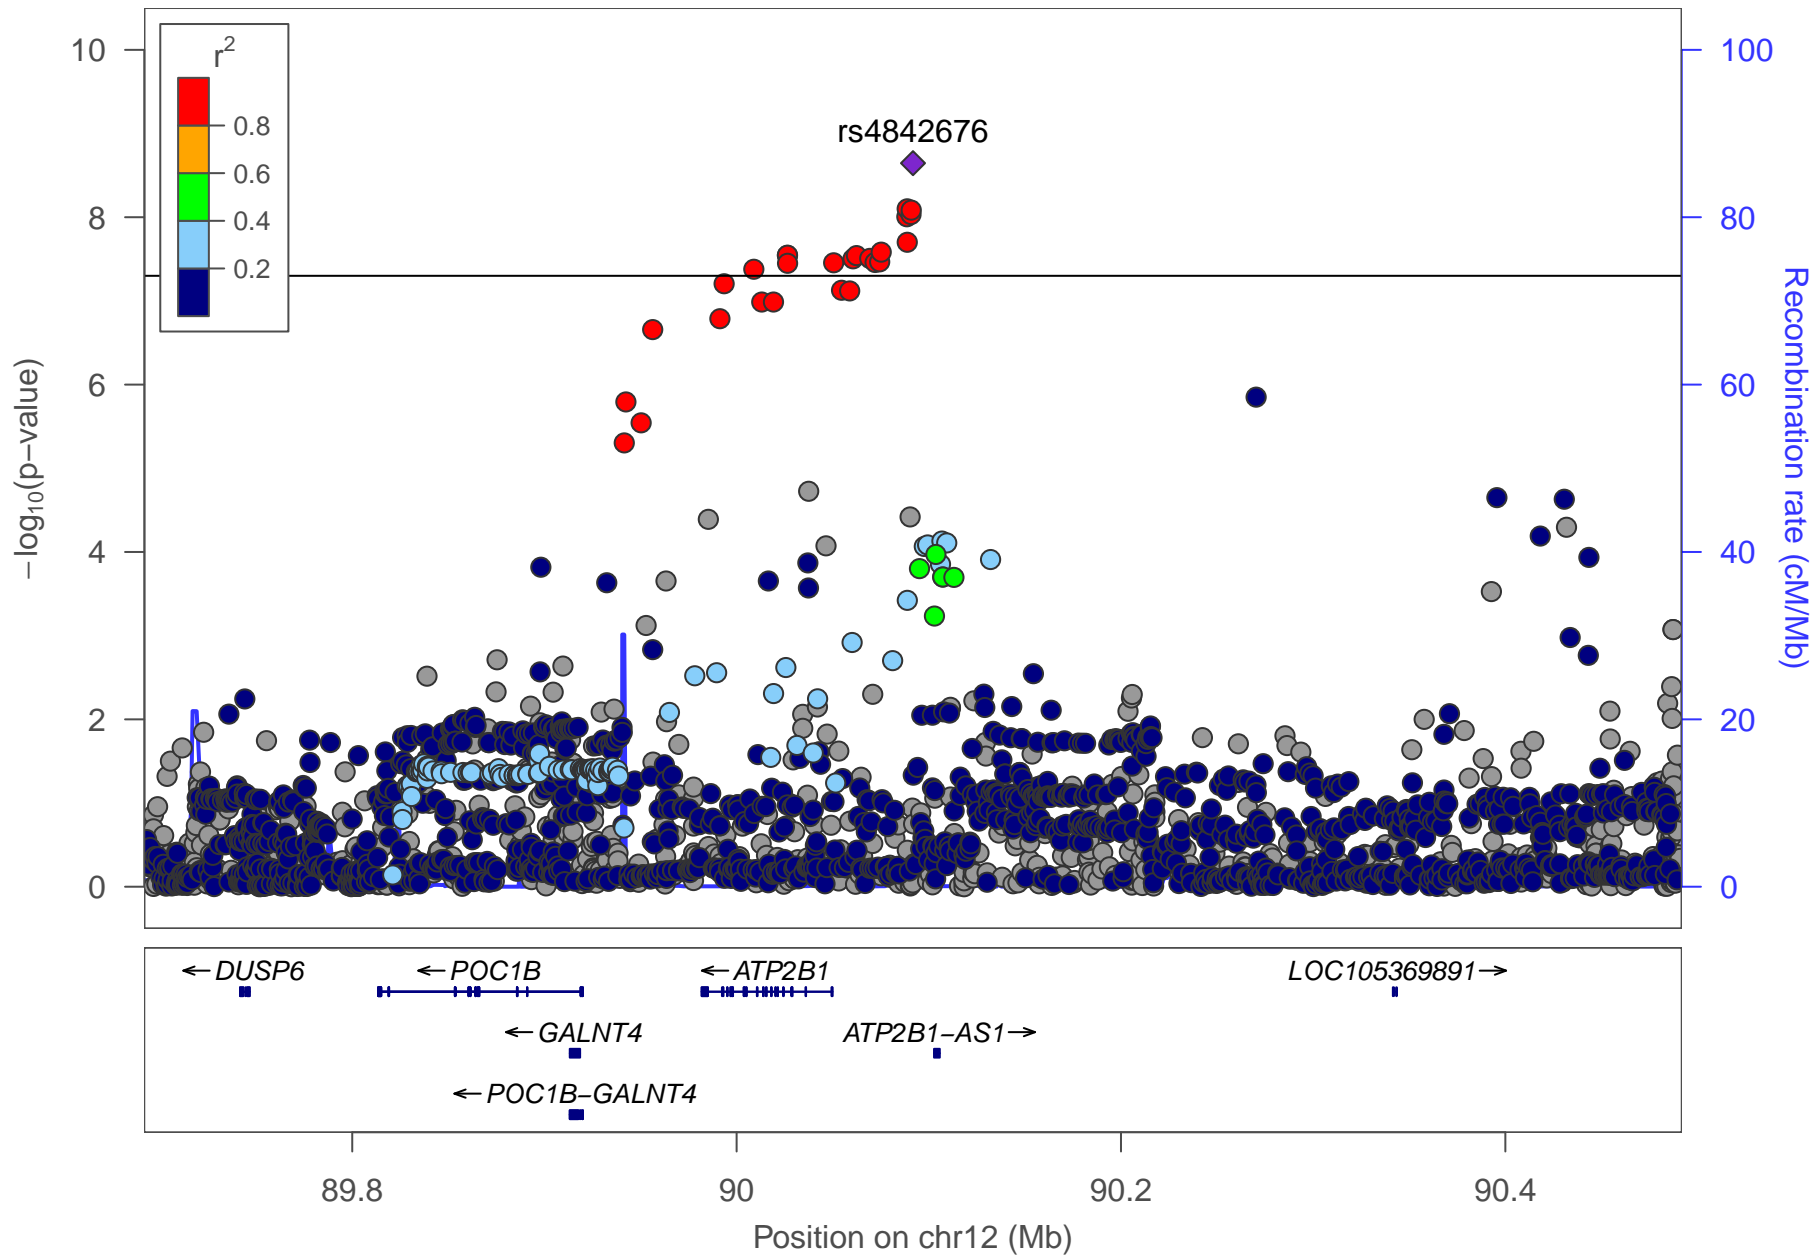

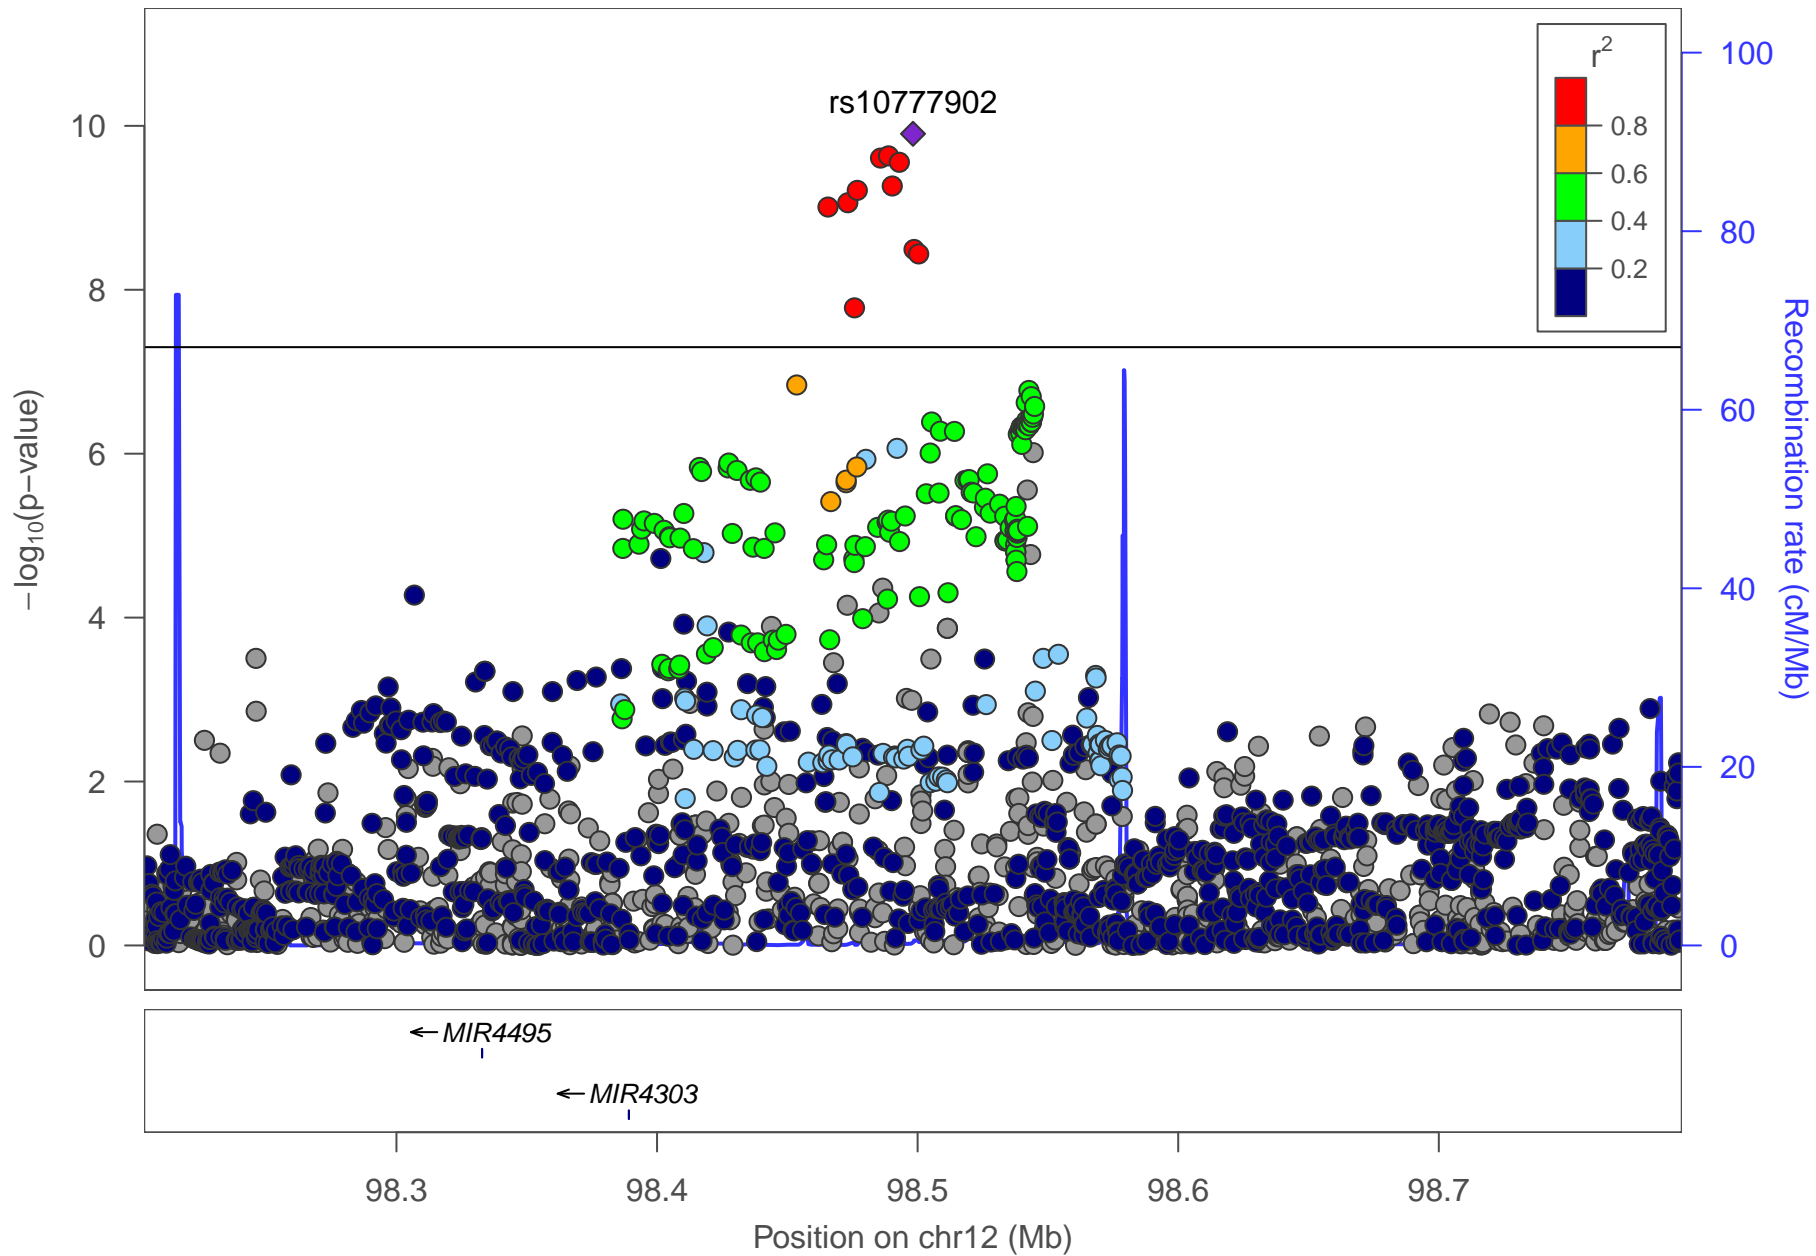

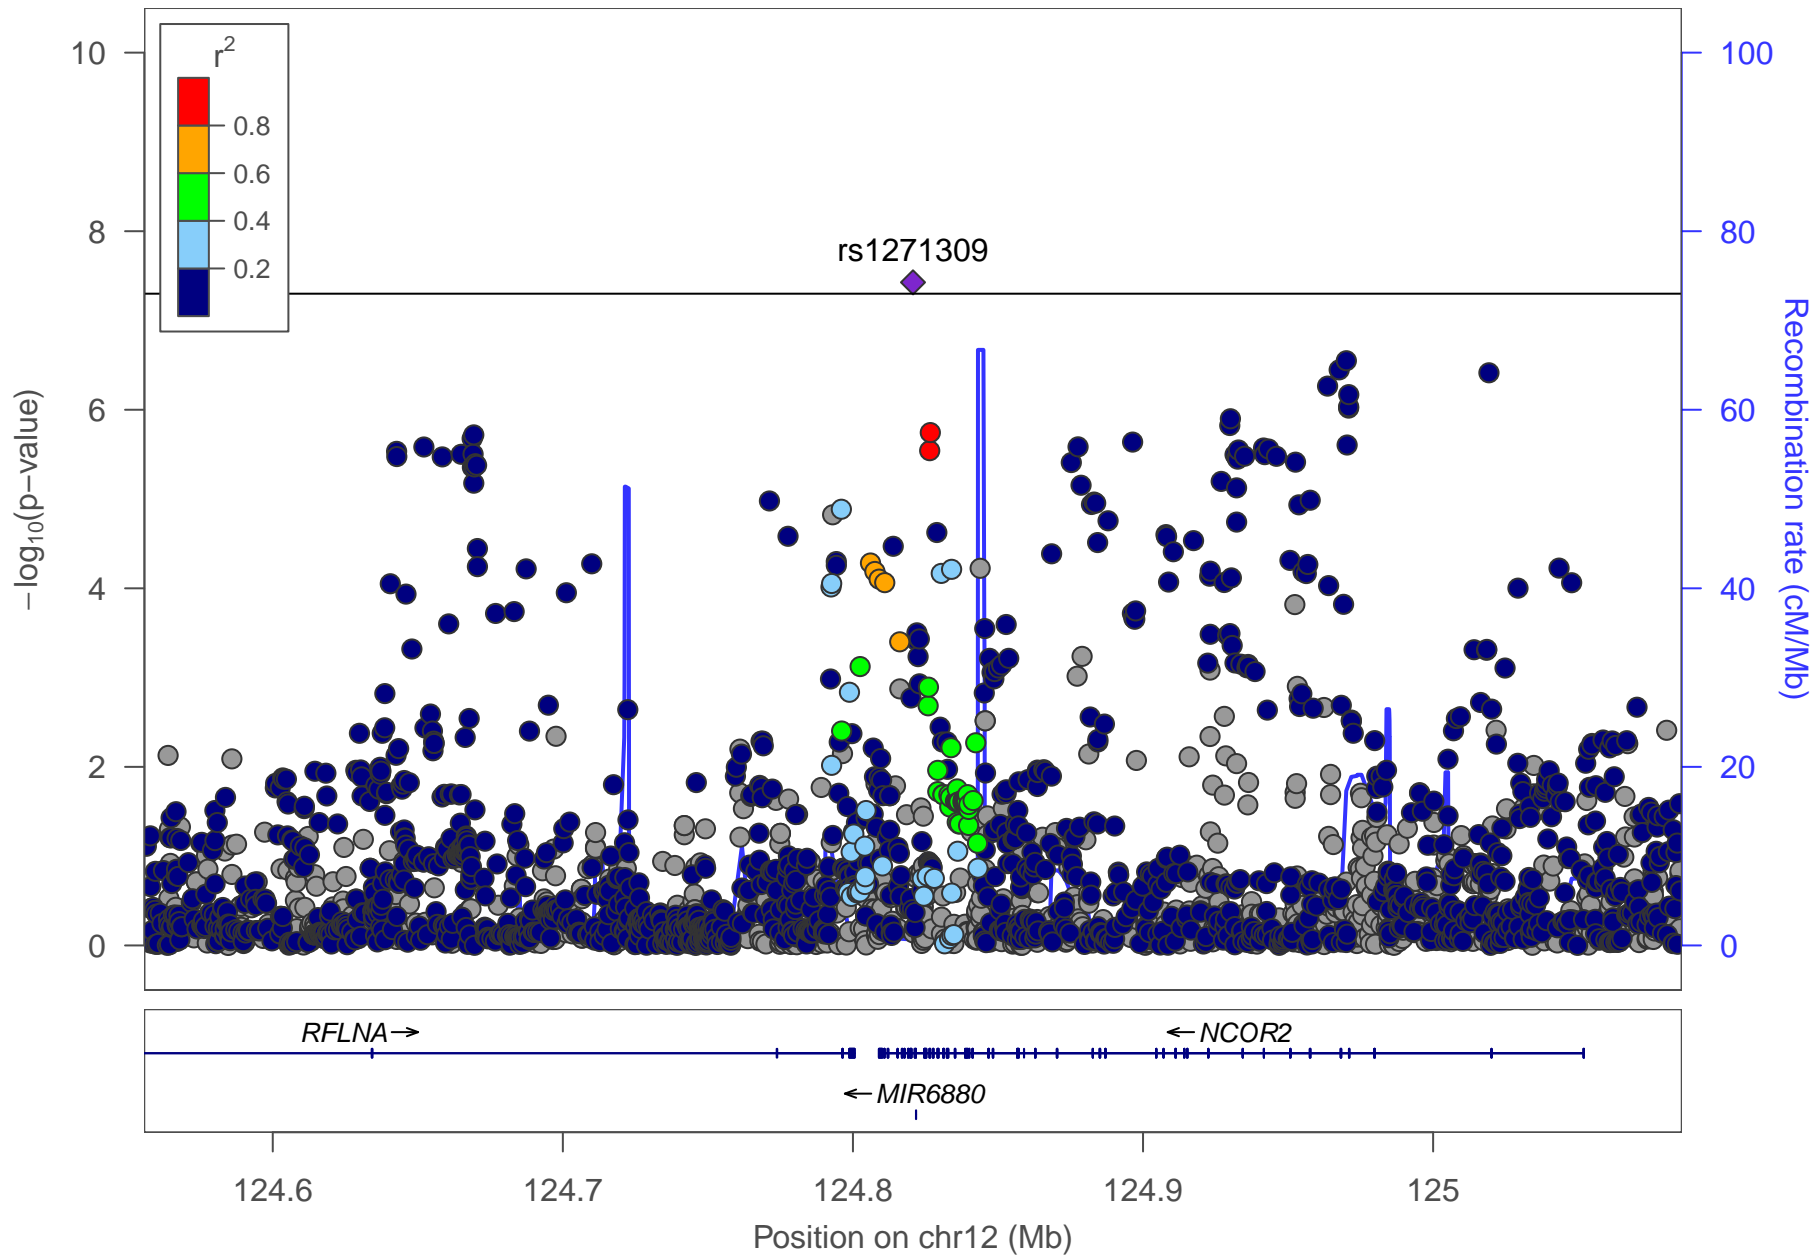

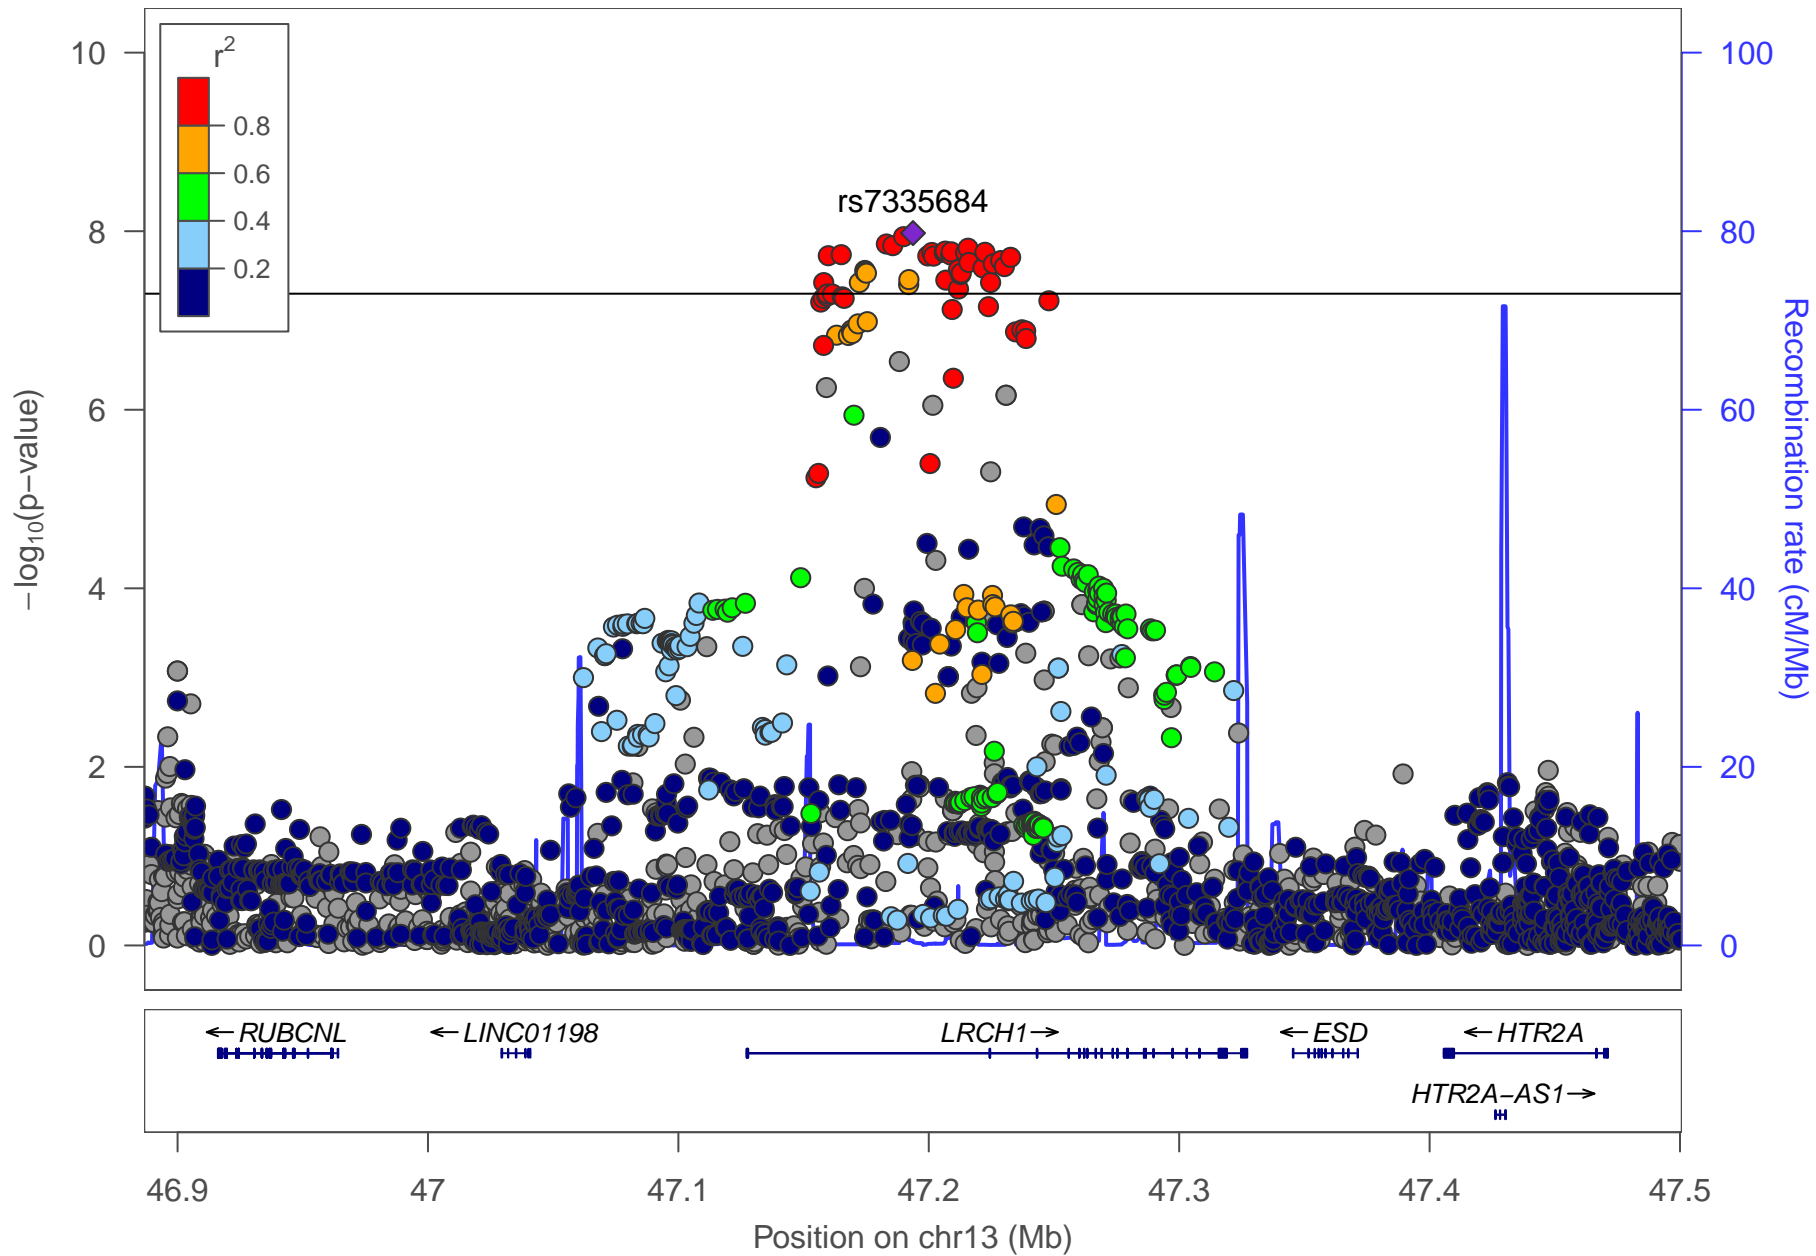



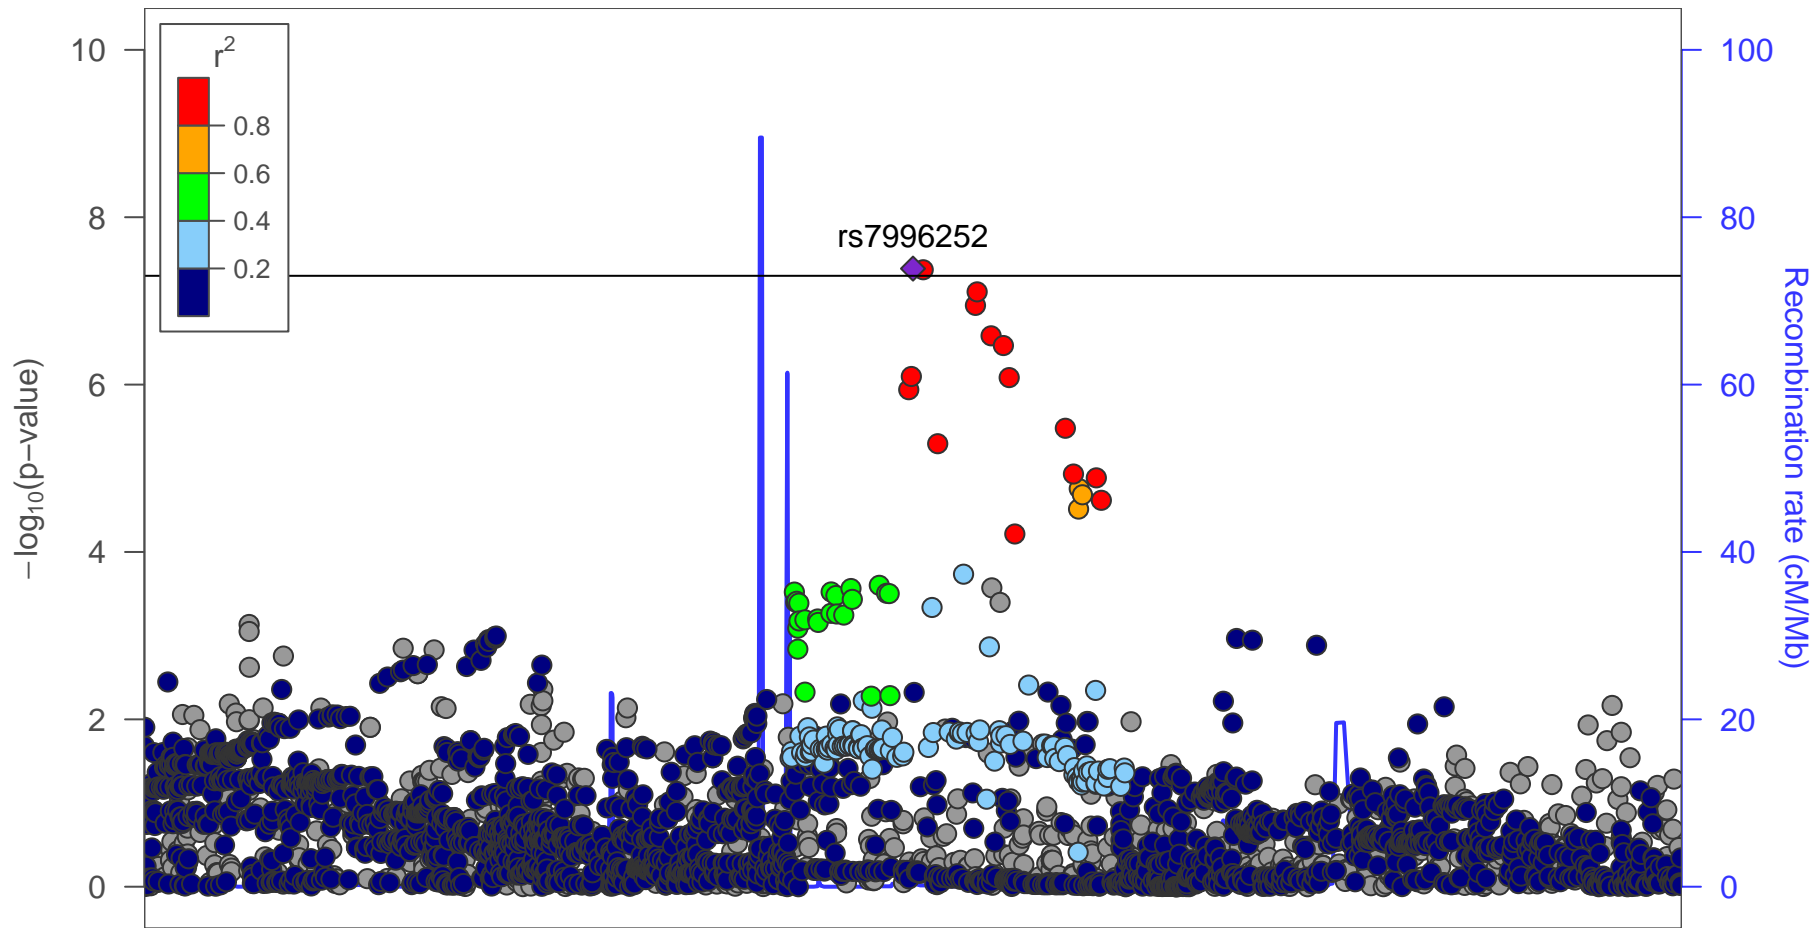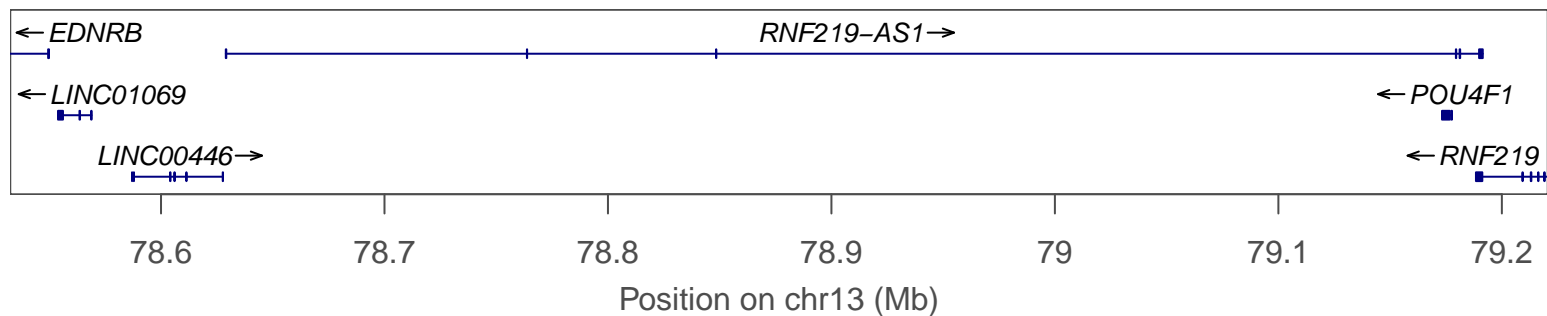

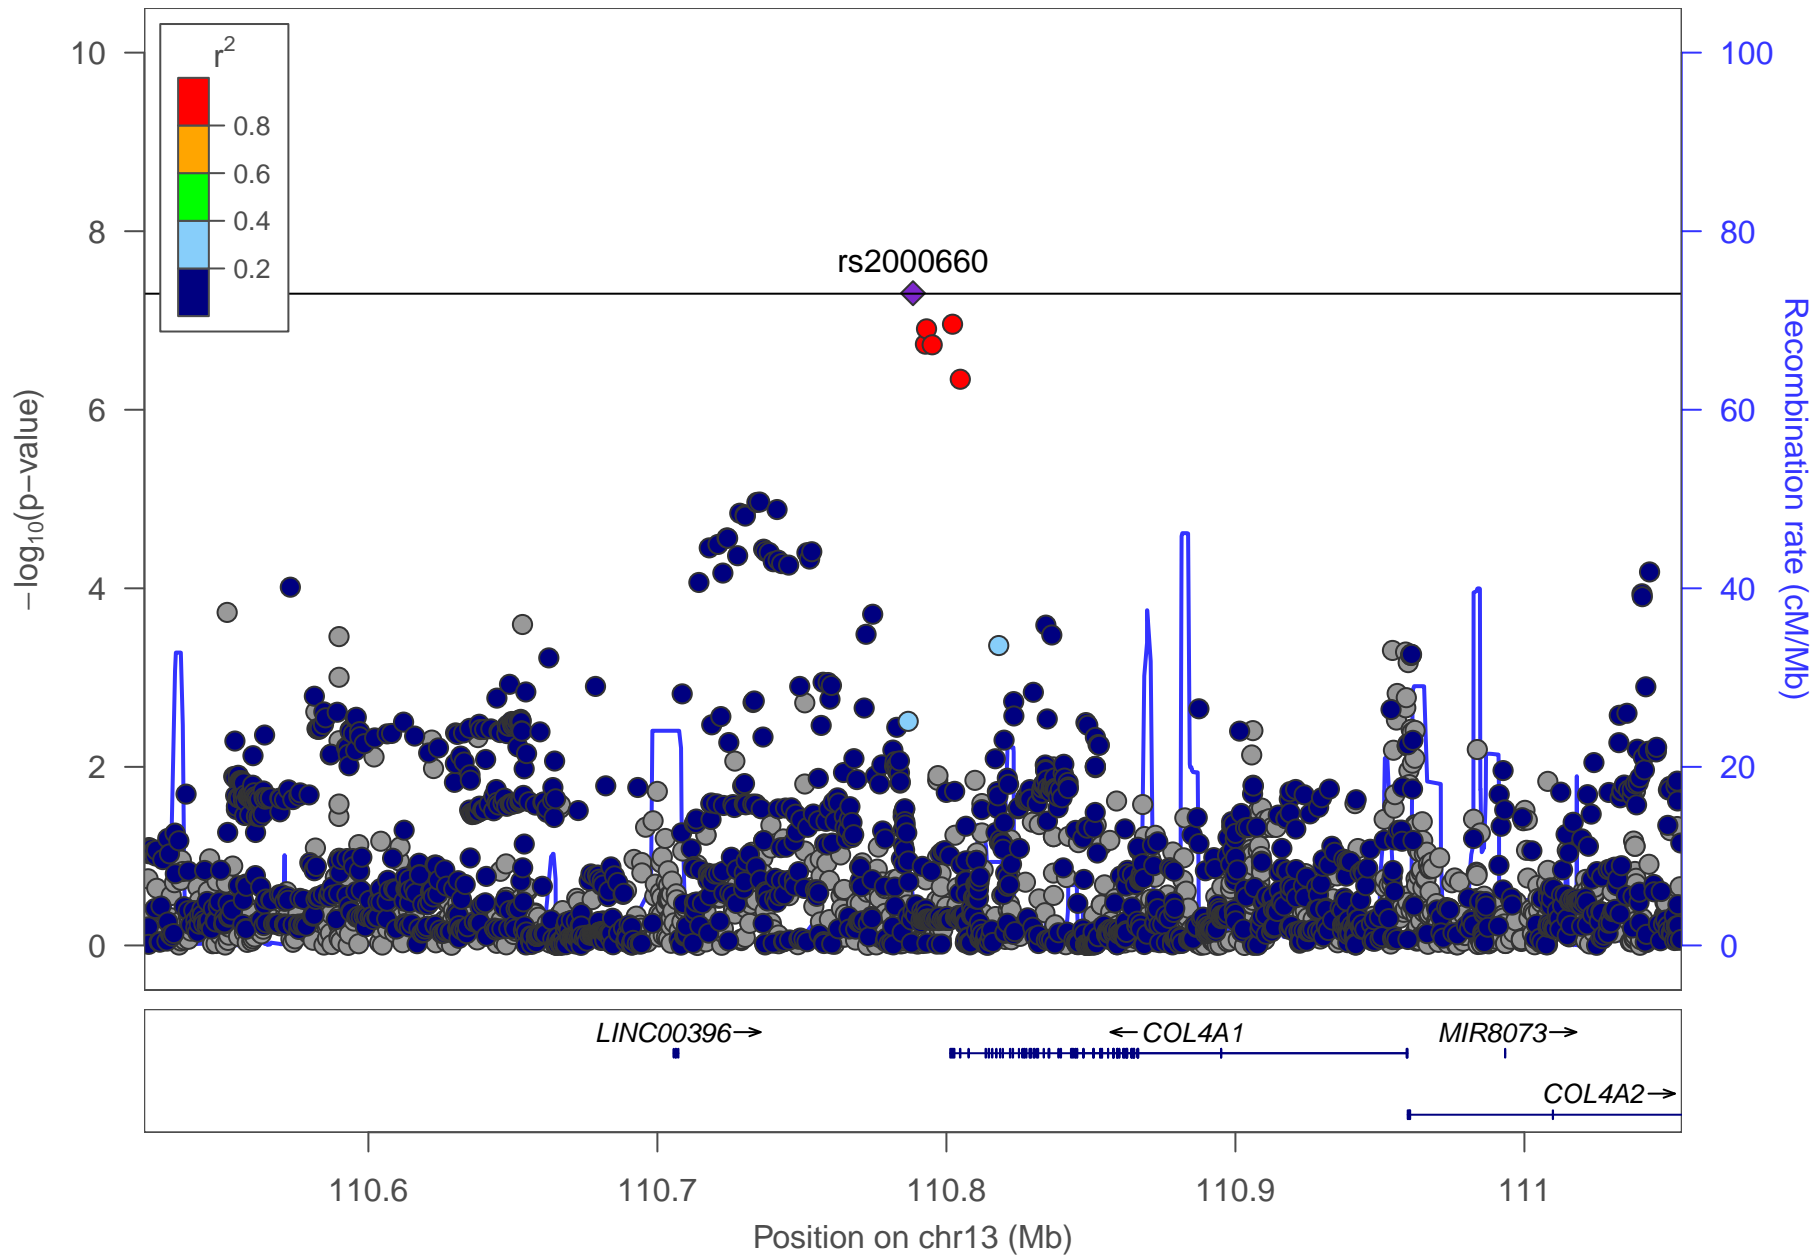

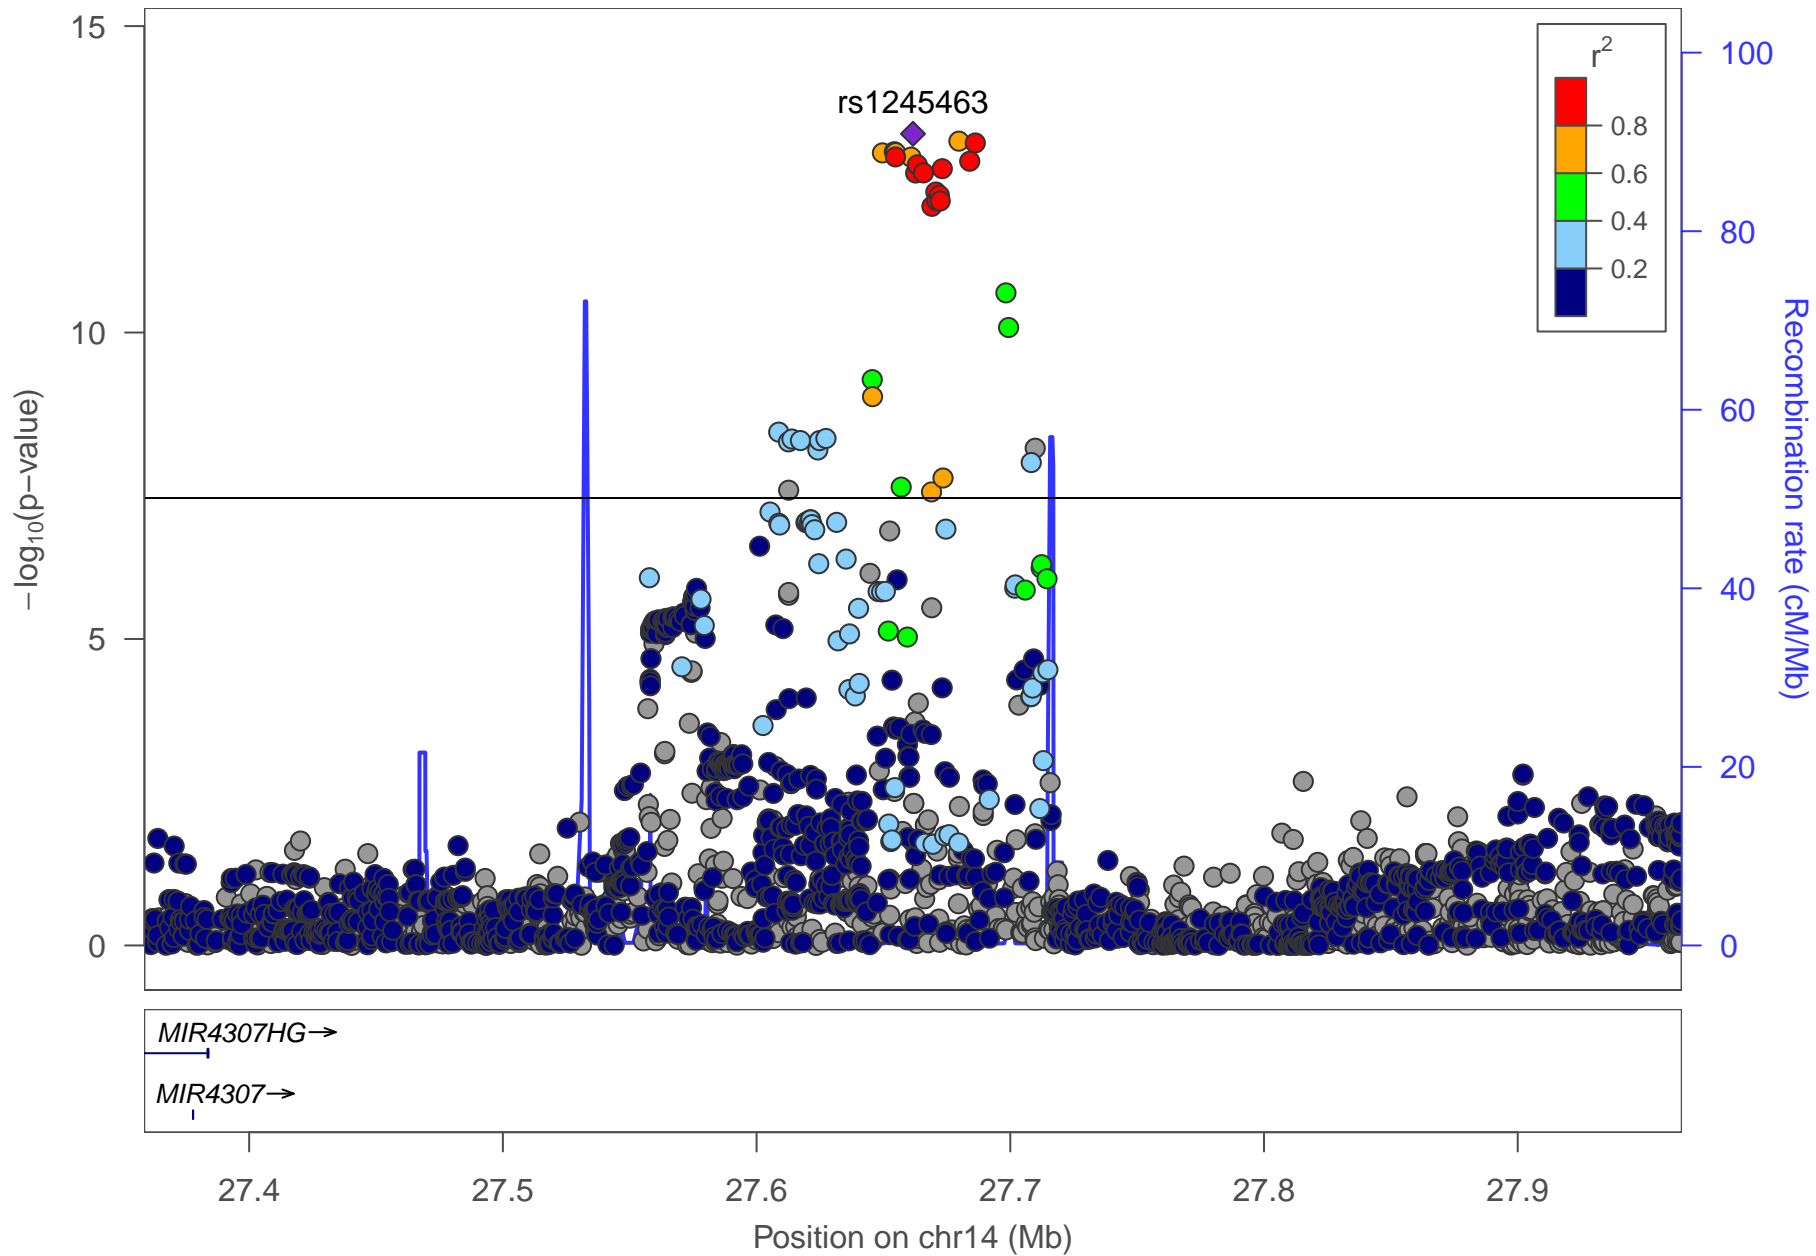

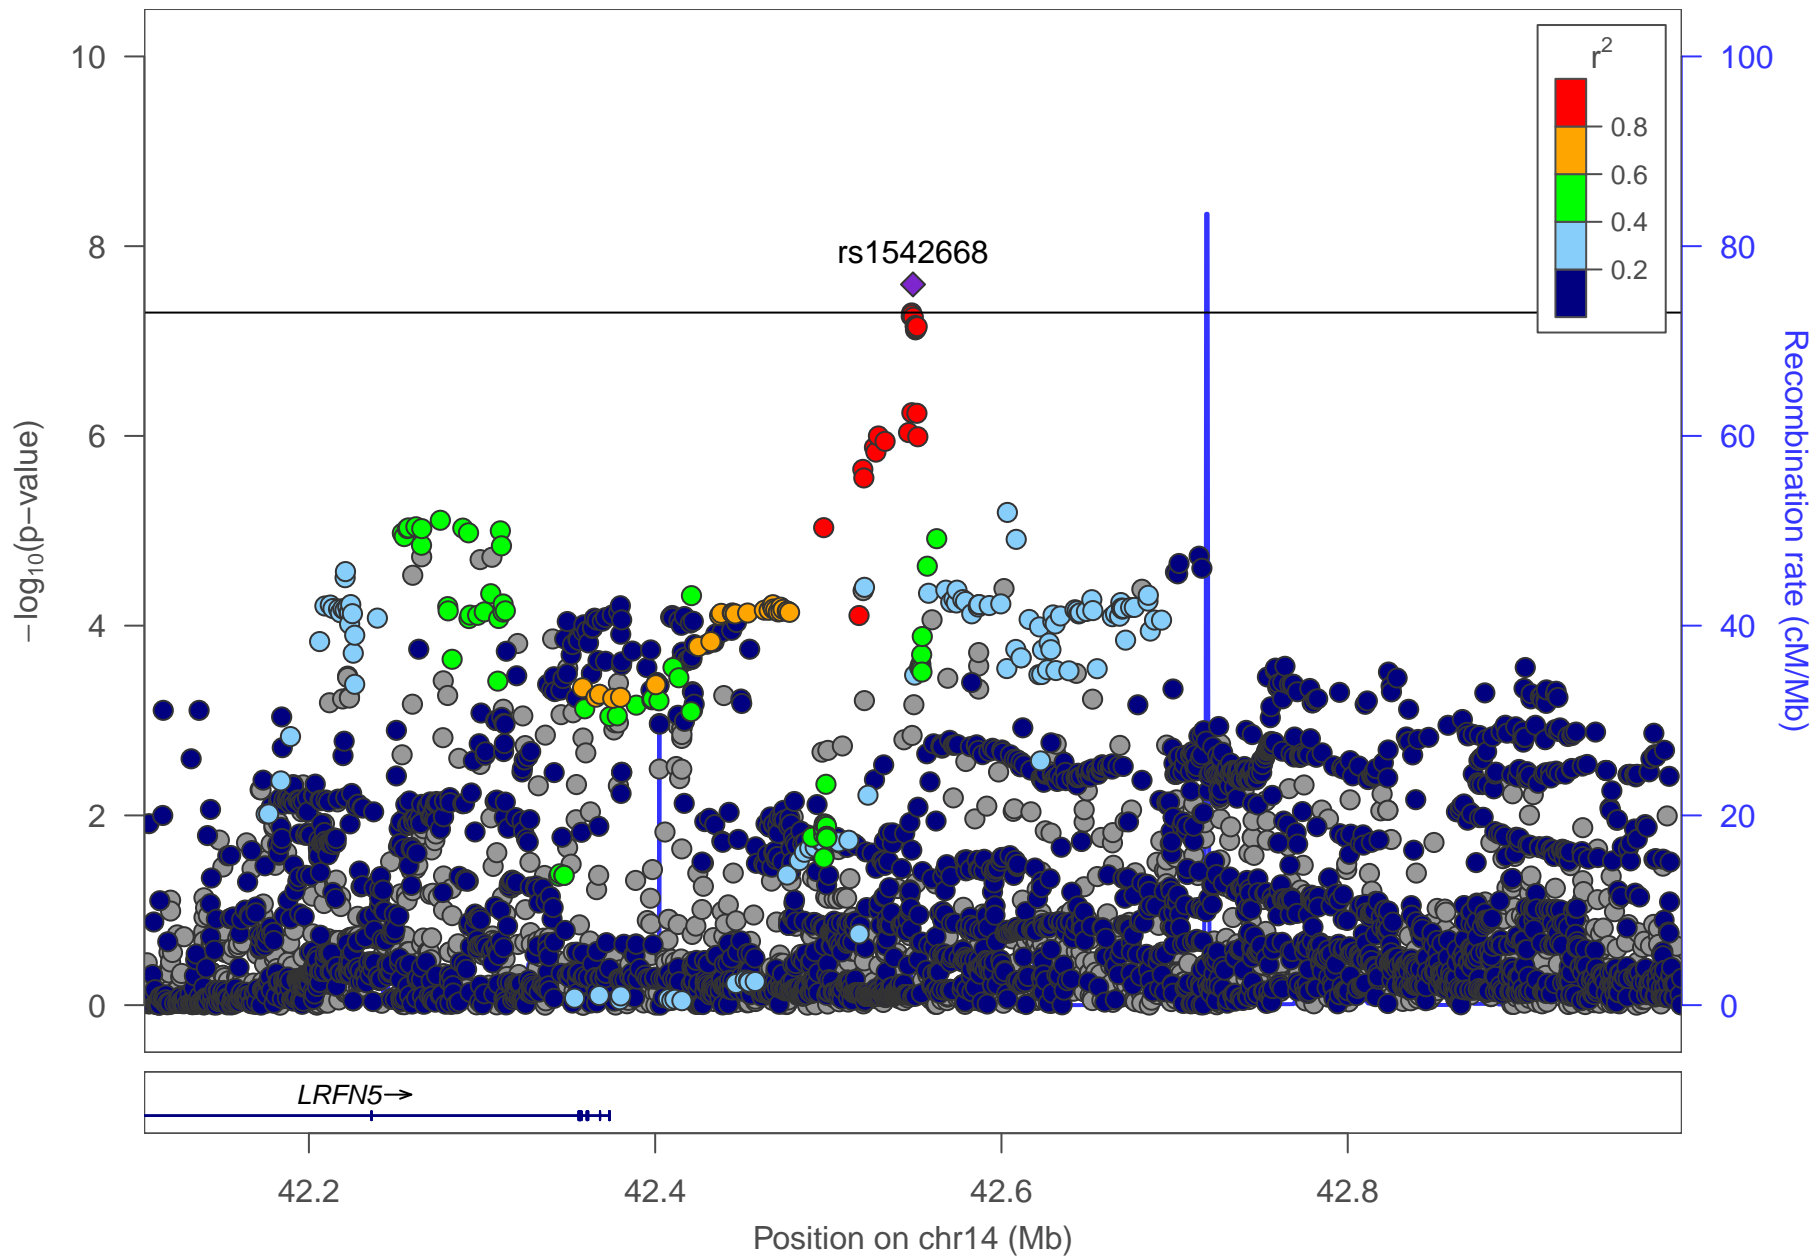

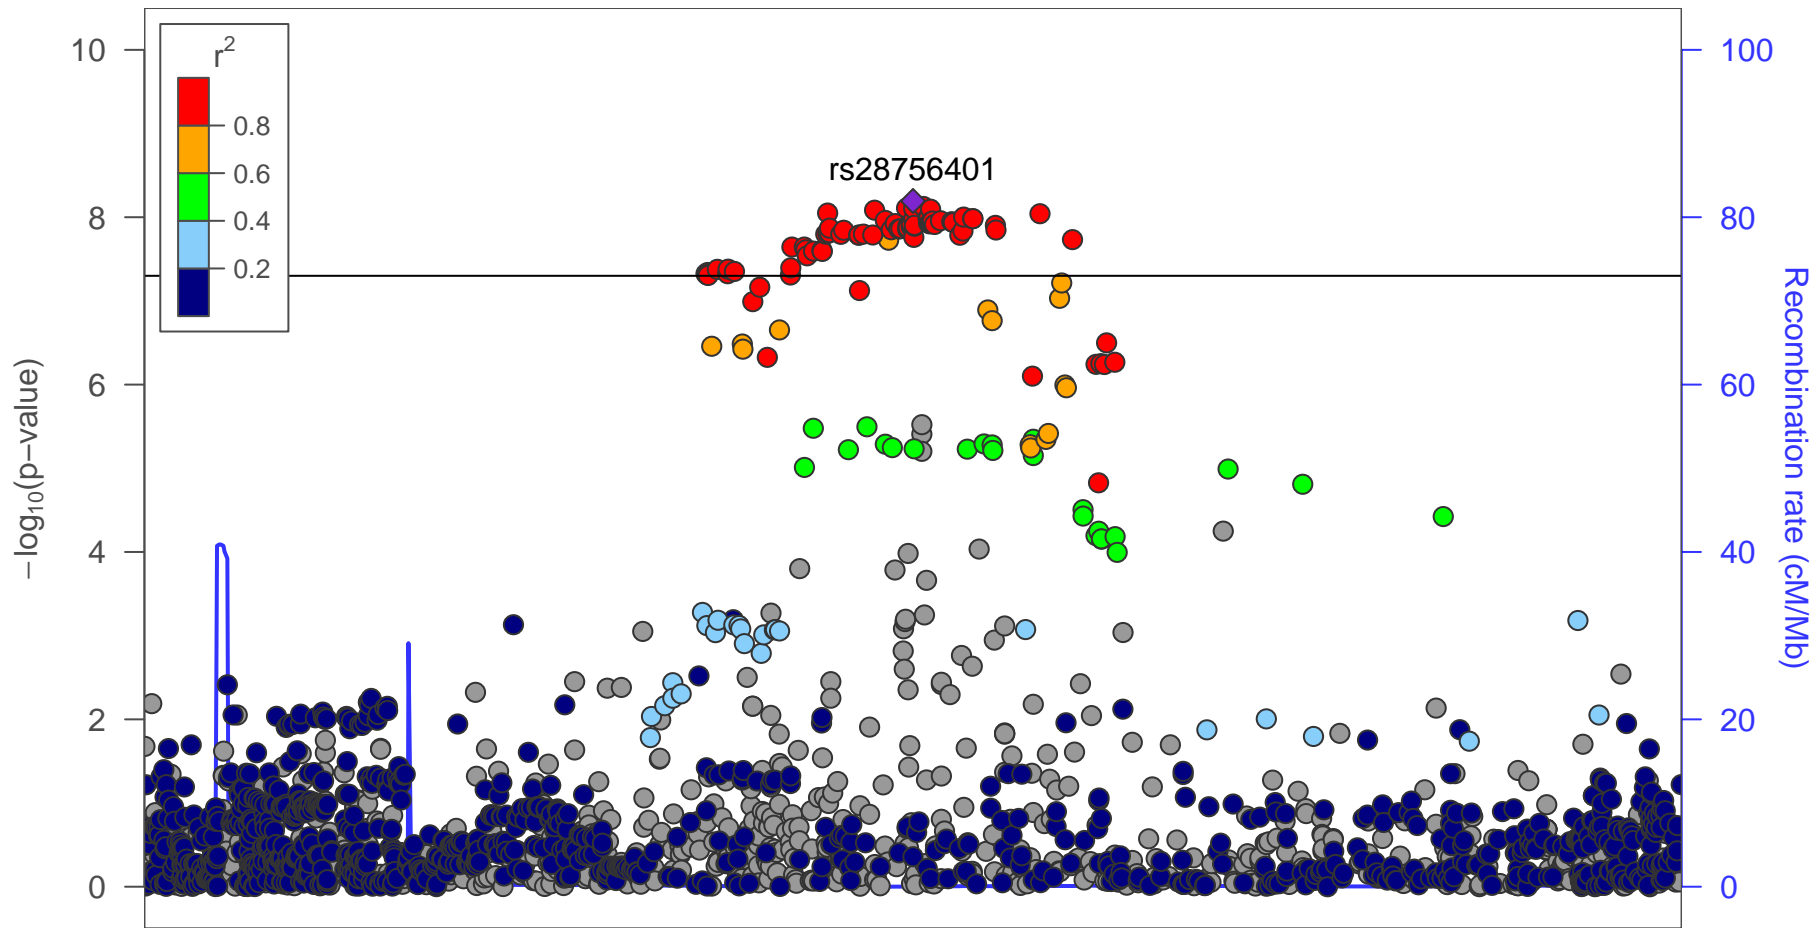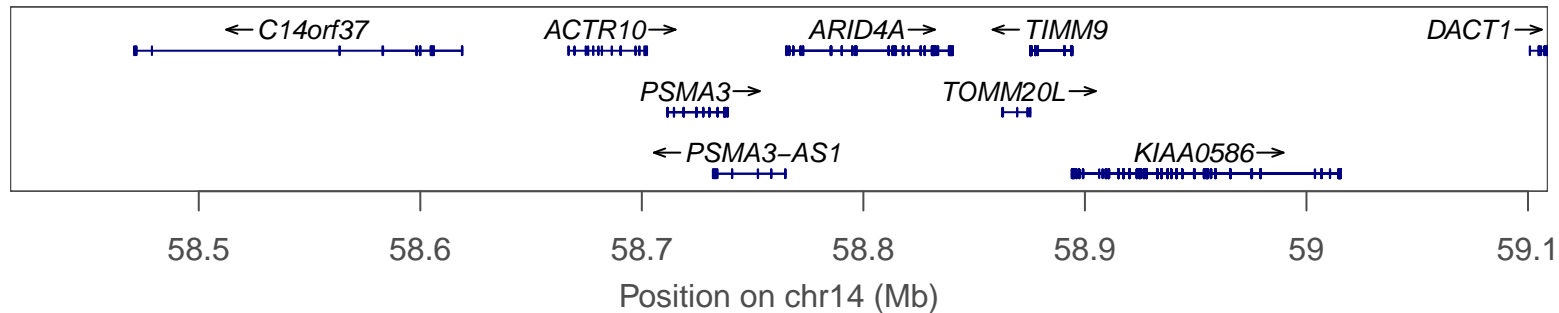

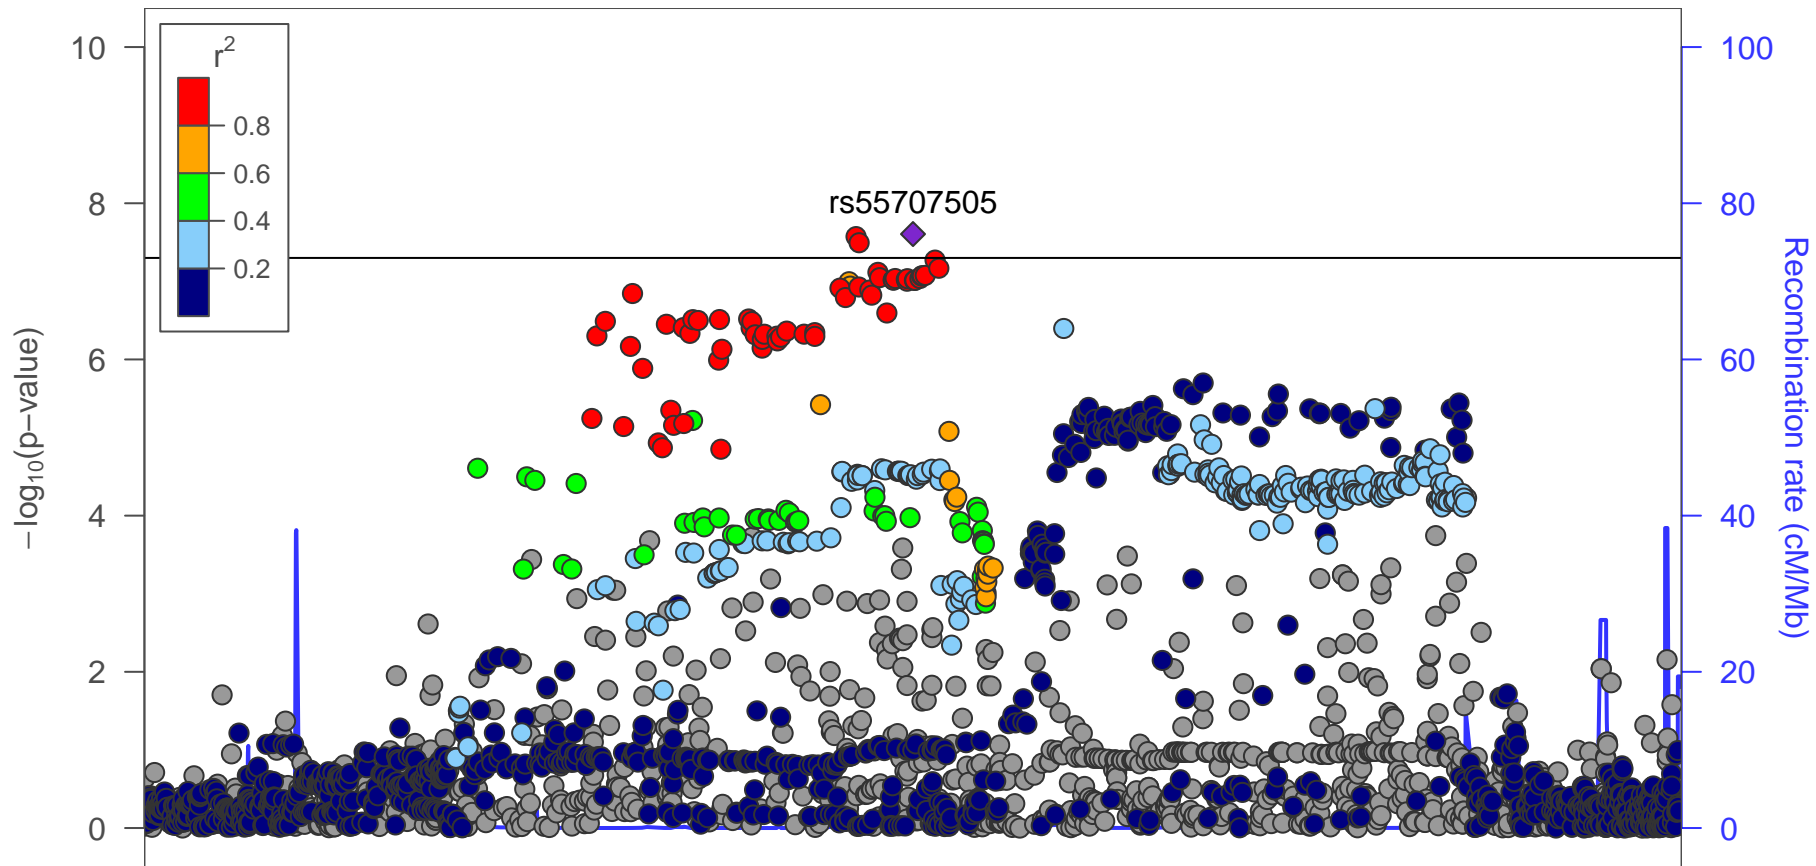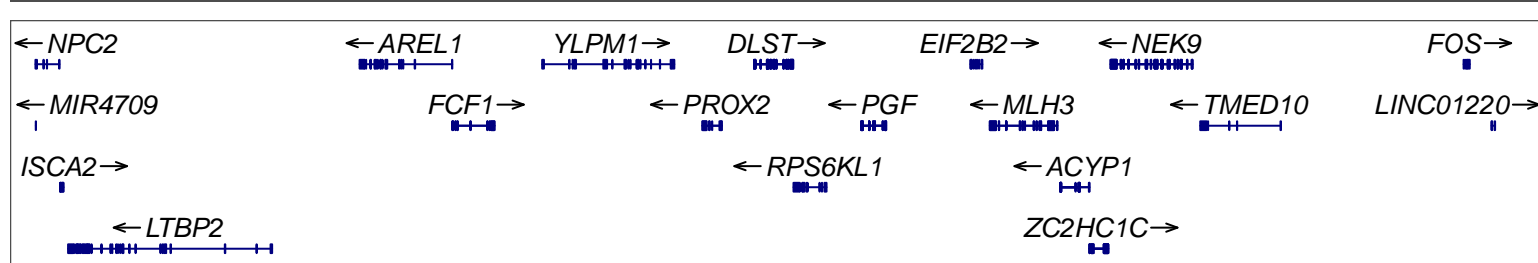

75

75.2

75.4

75.6

Position on chr14 (Mb)

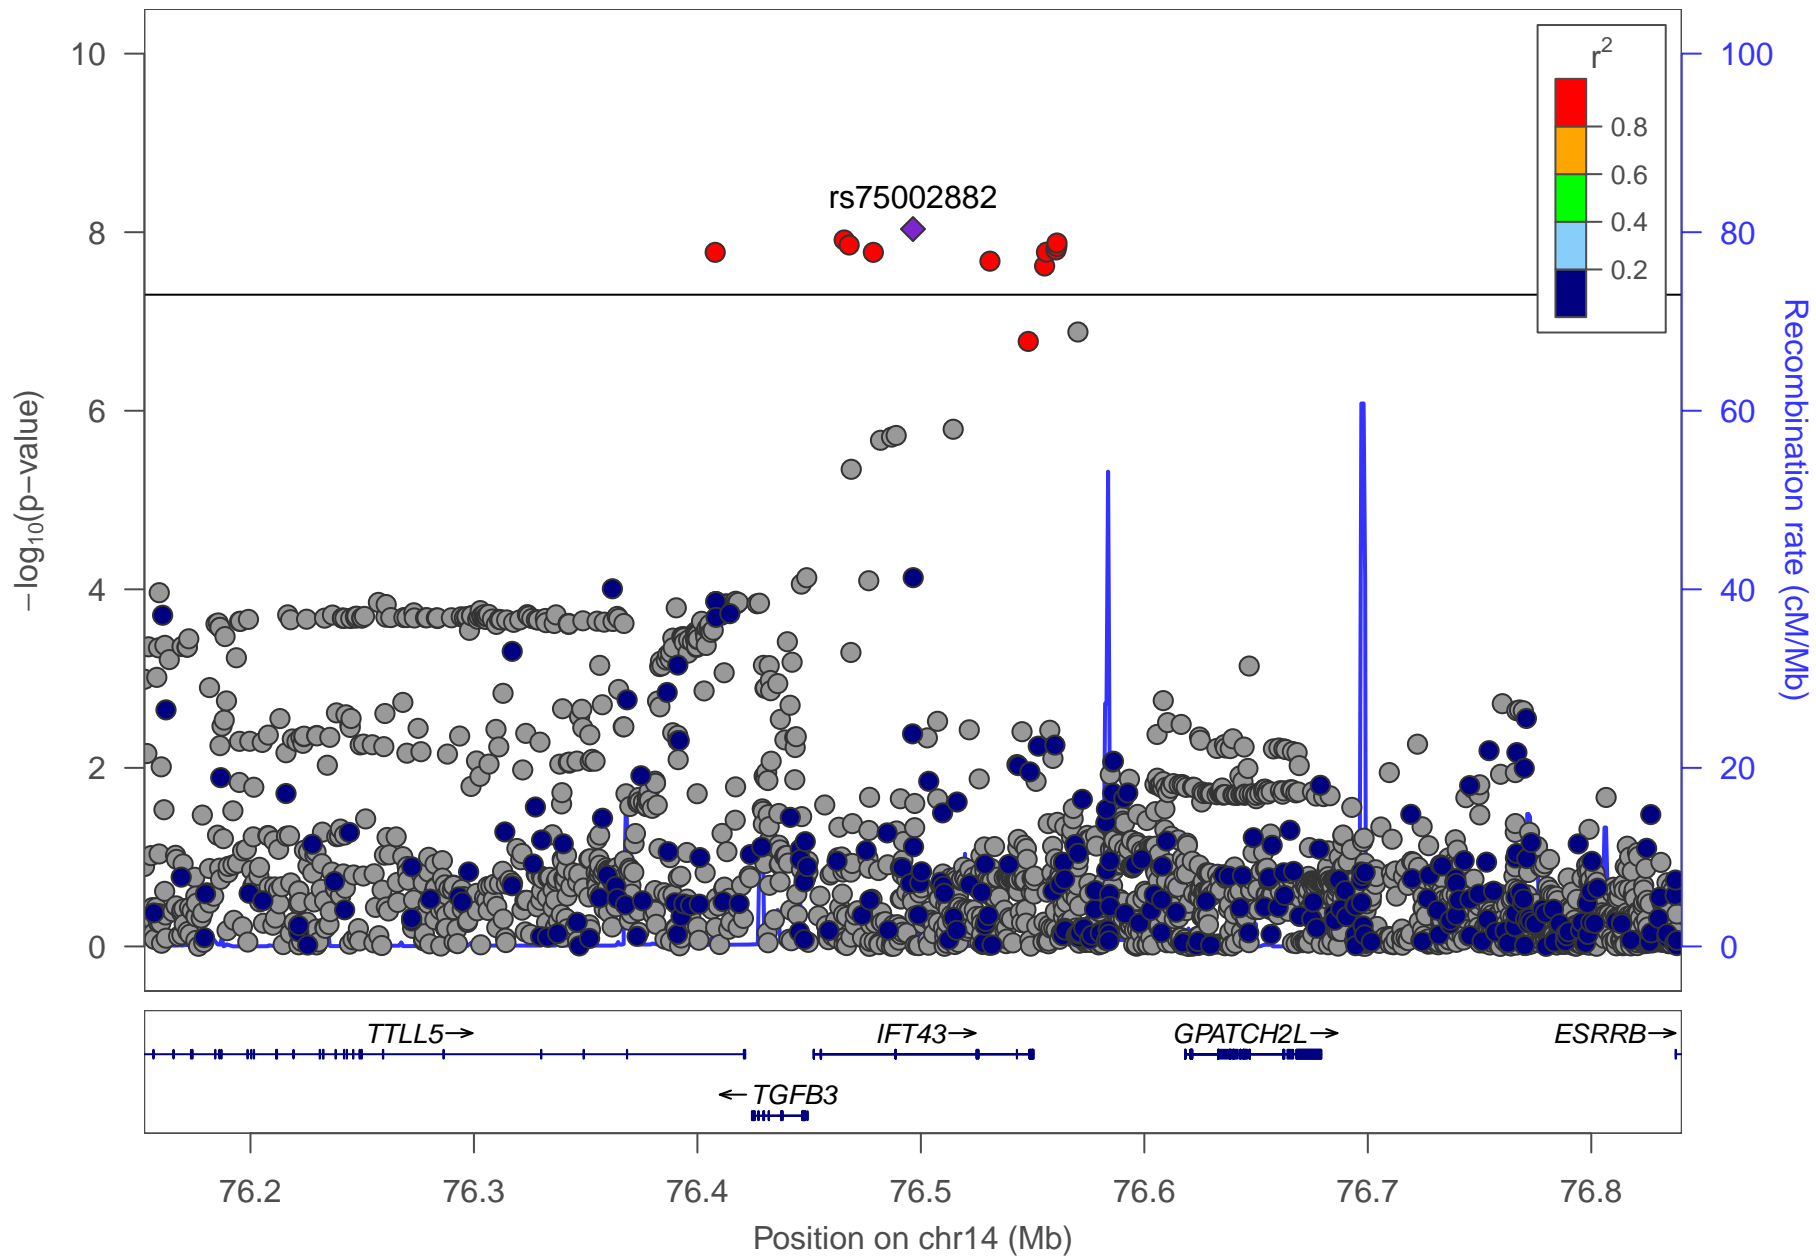

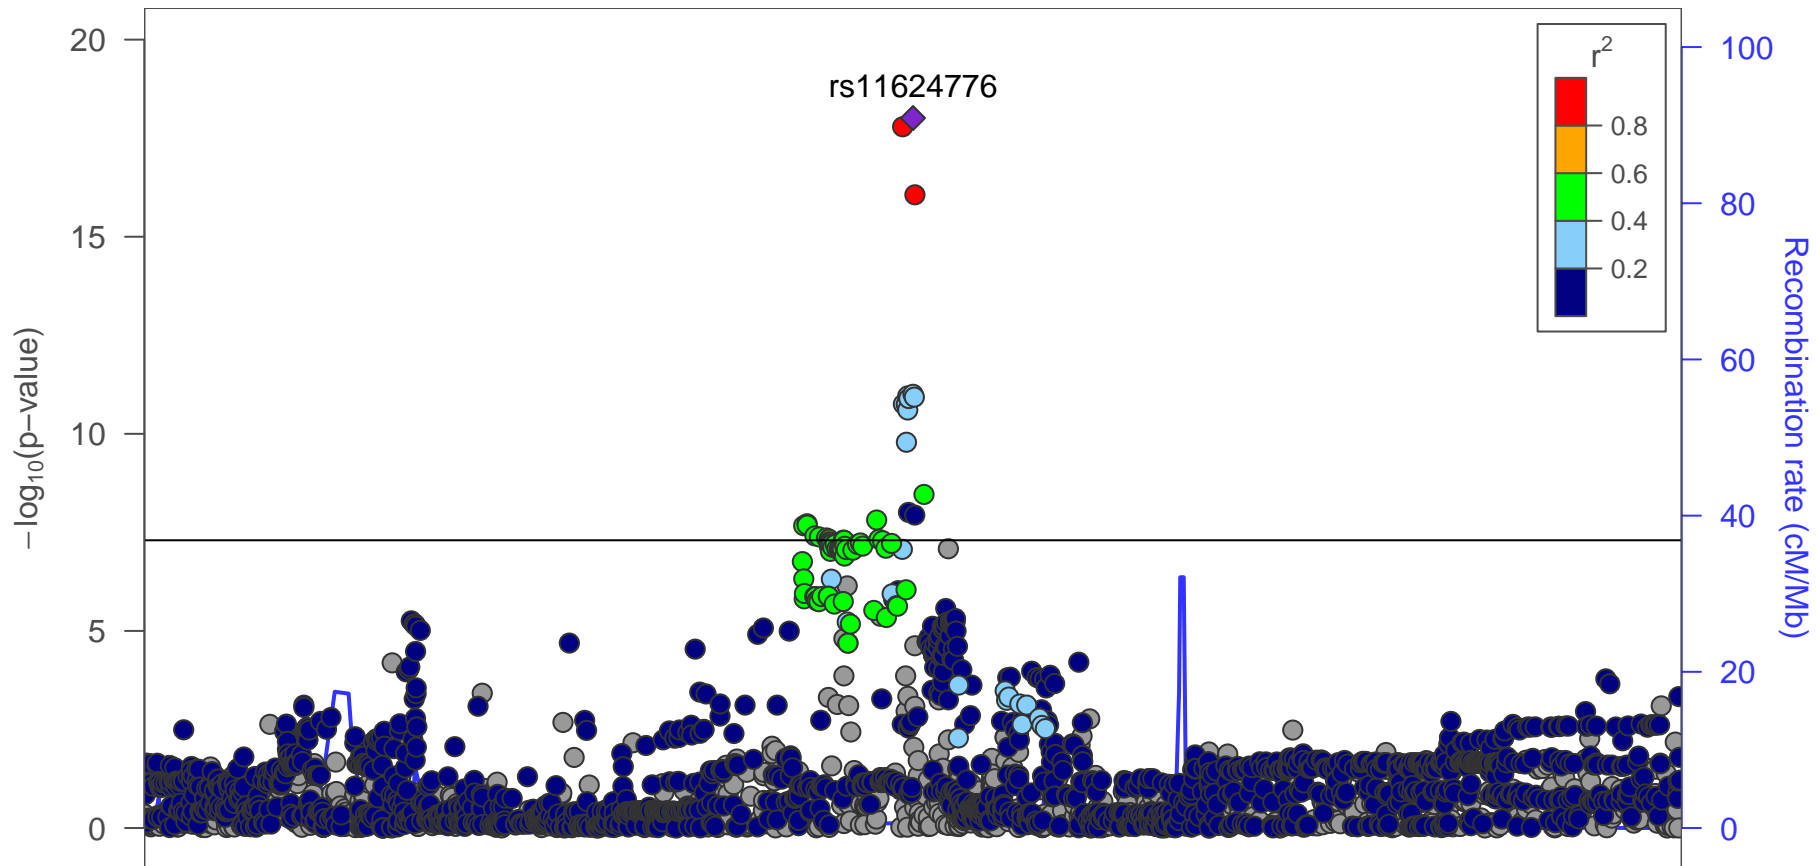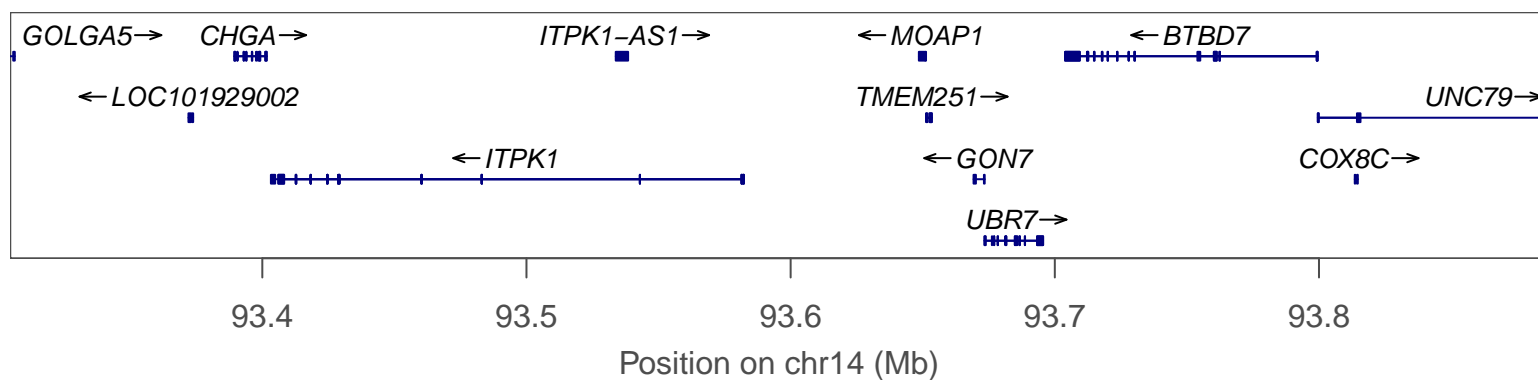



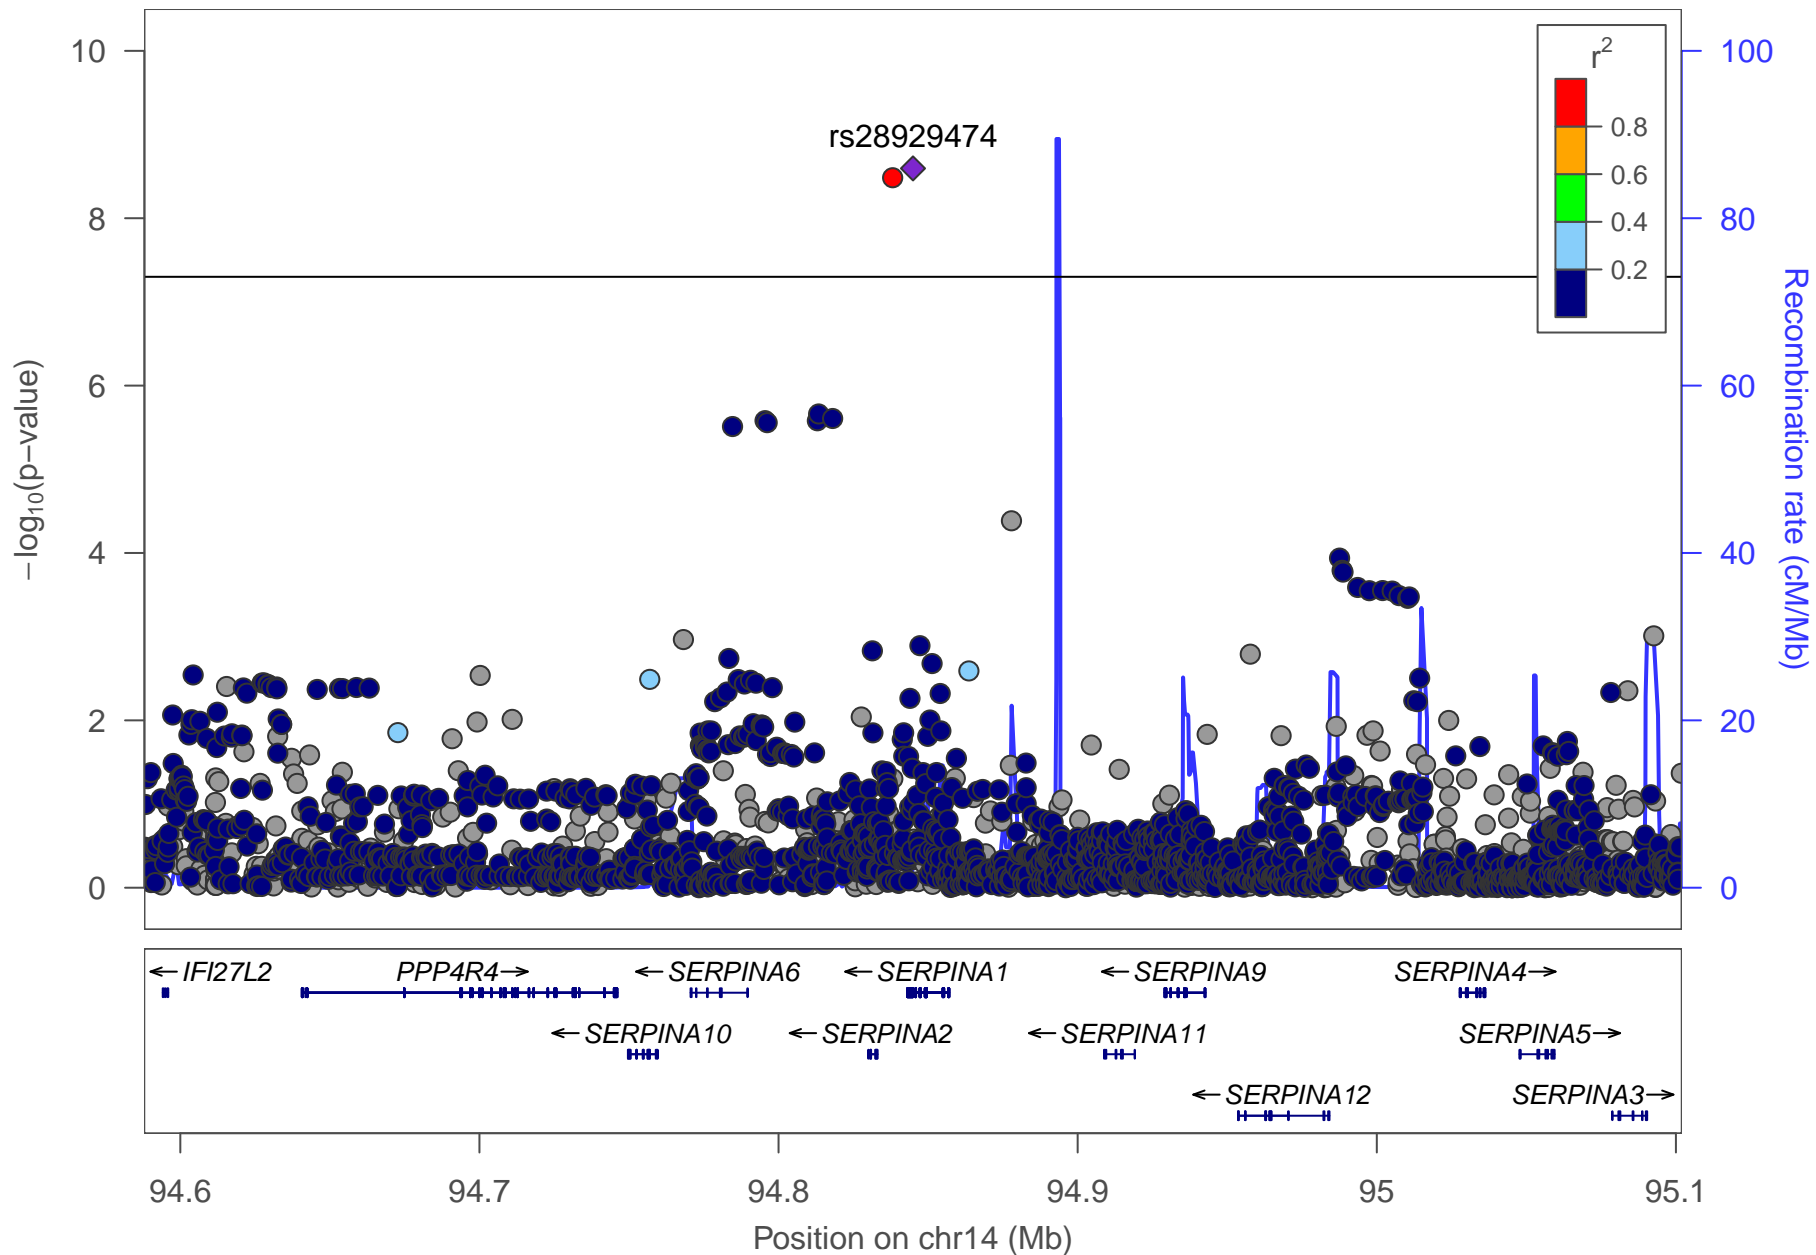

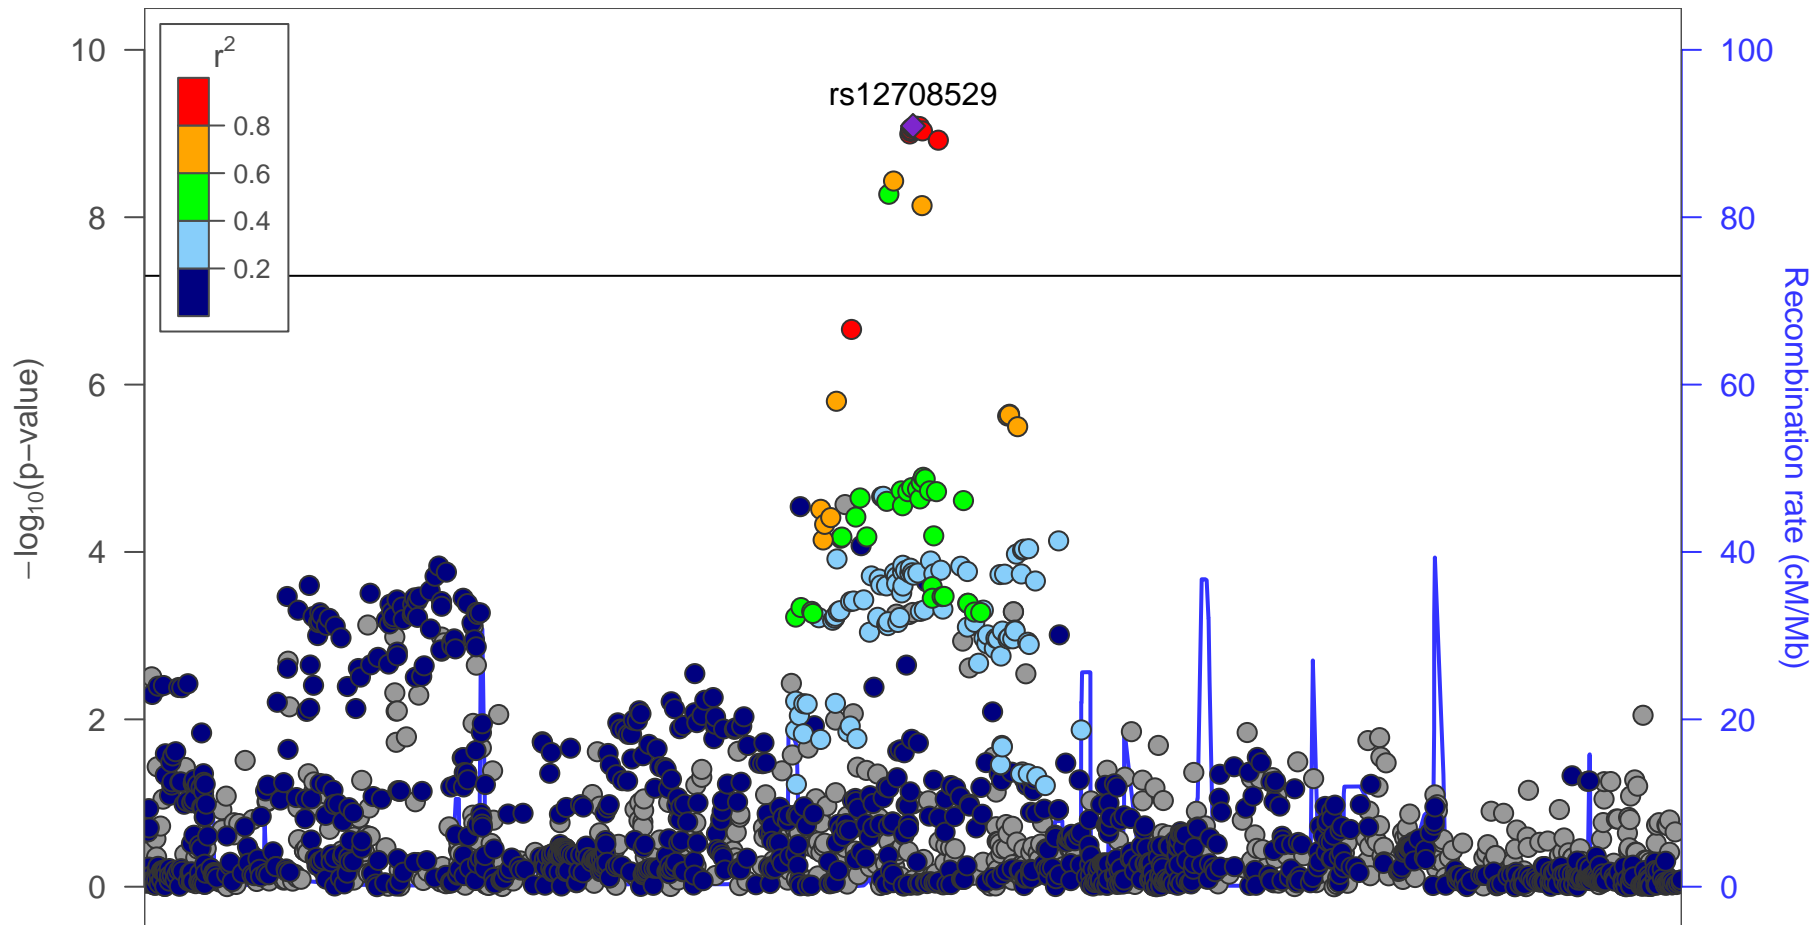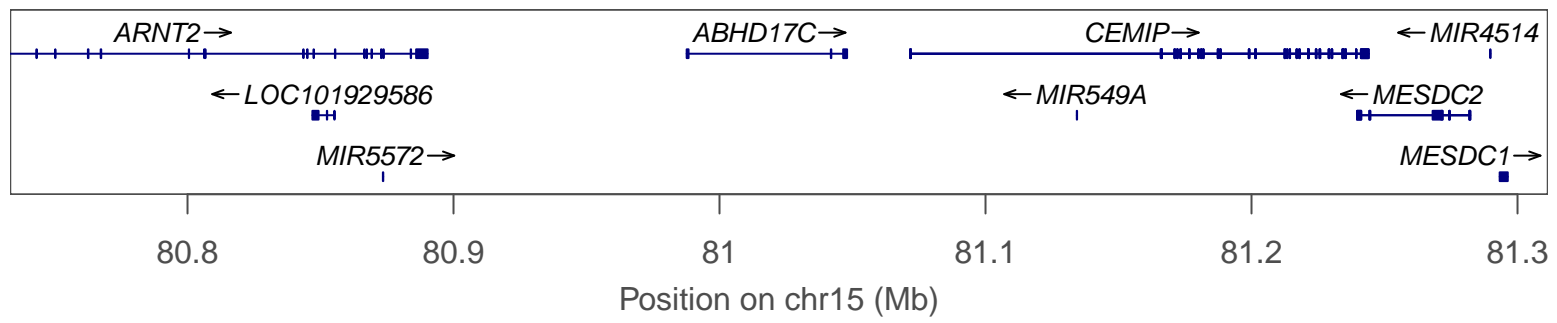

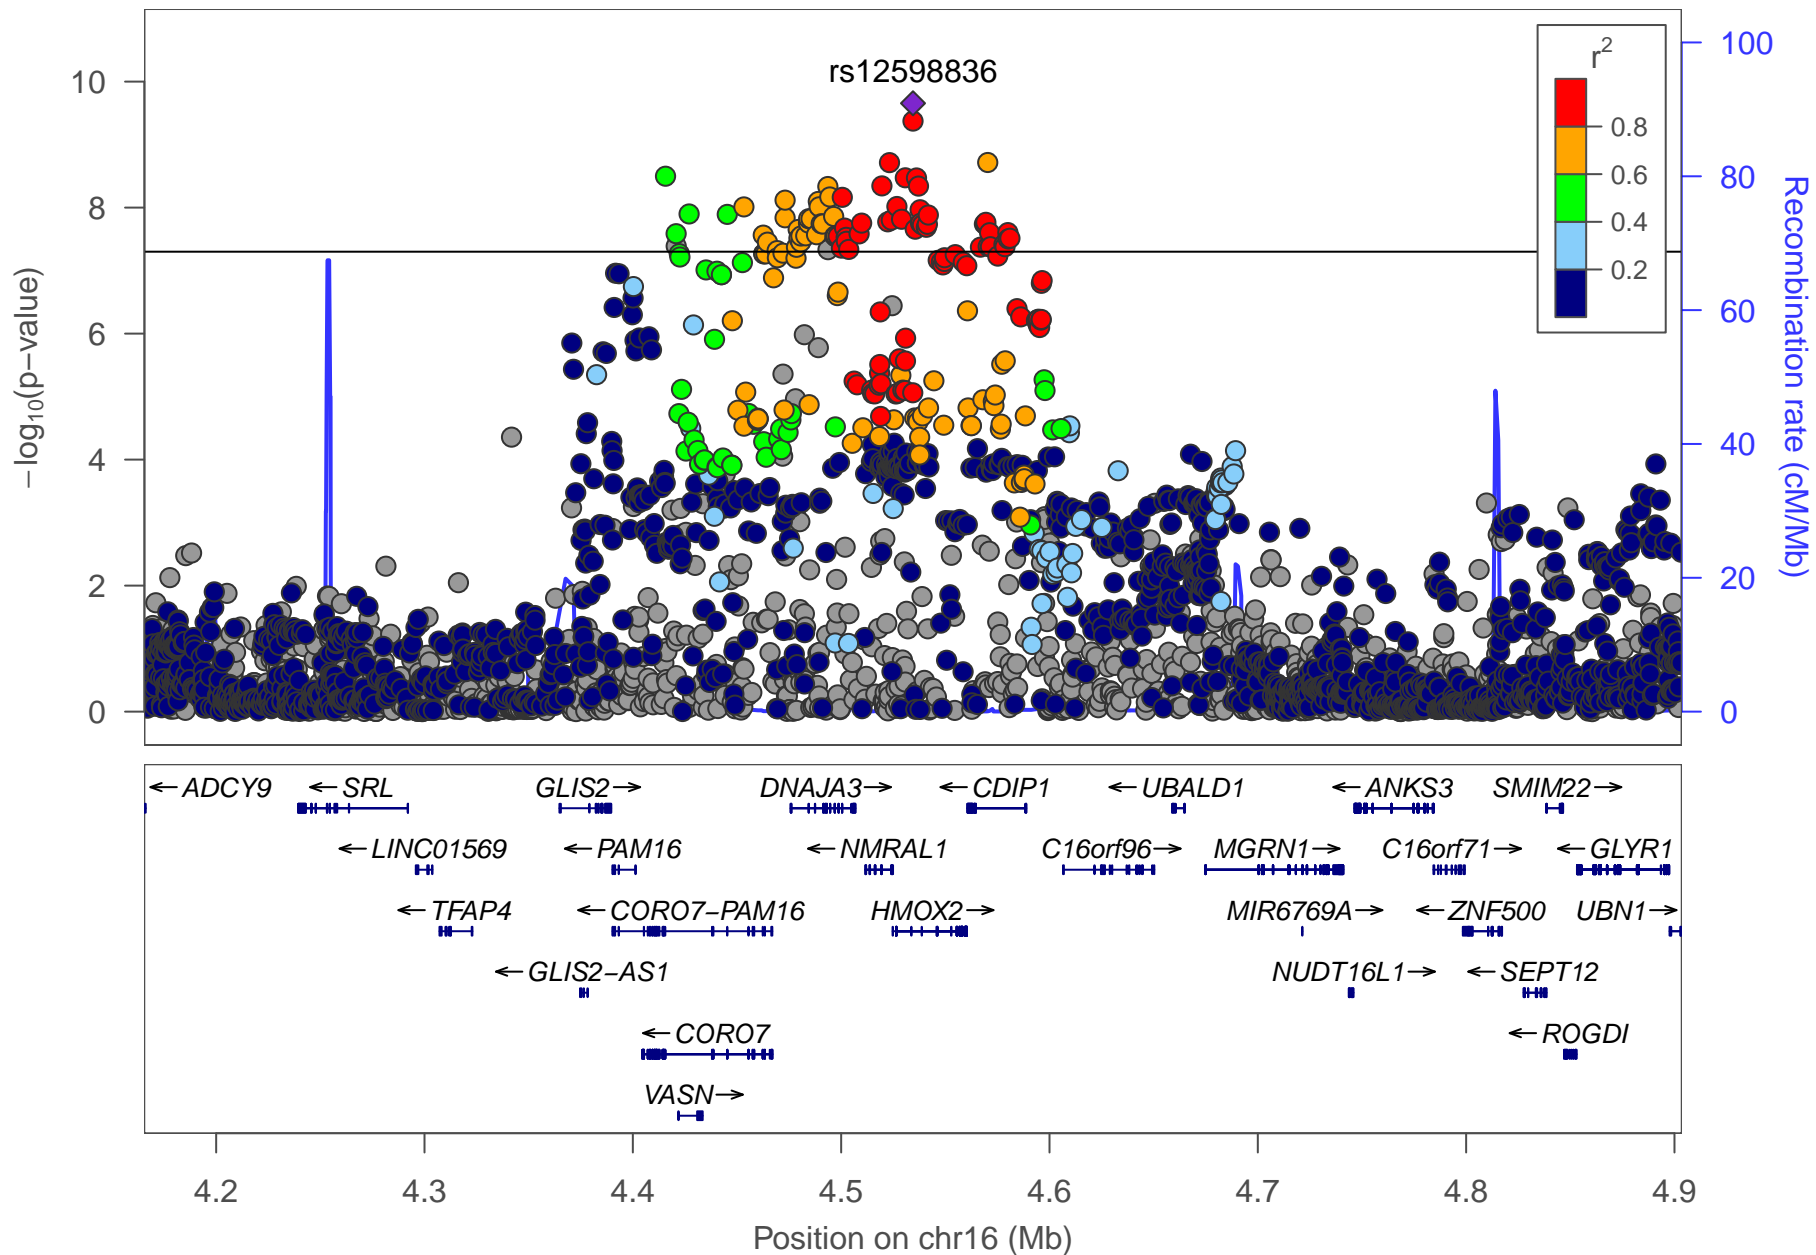

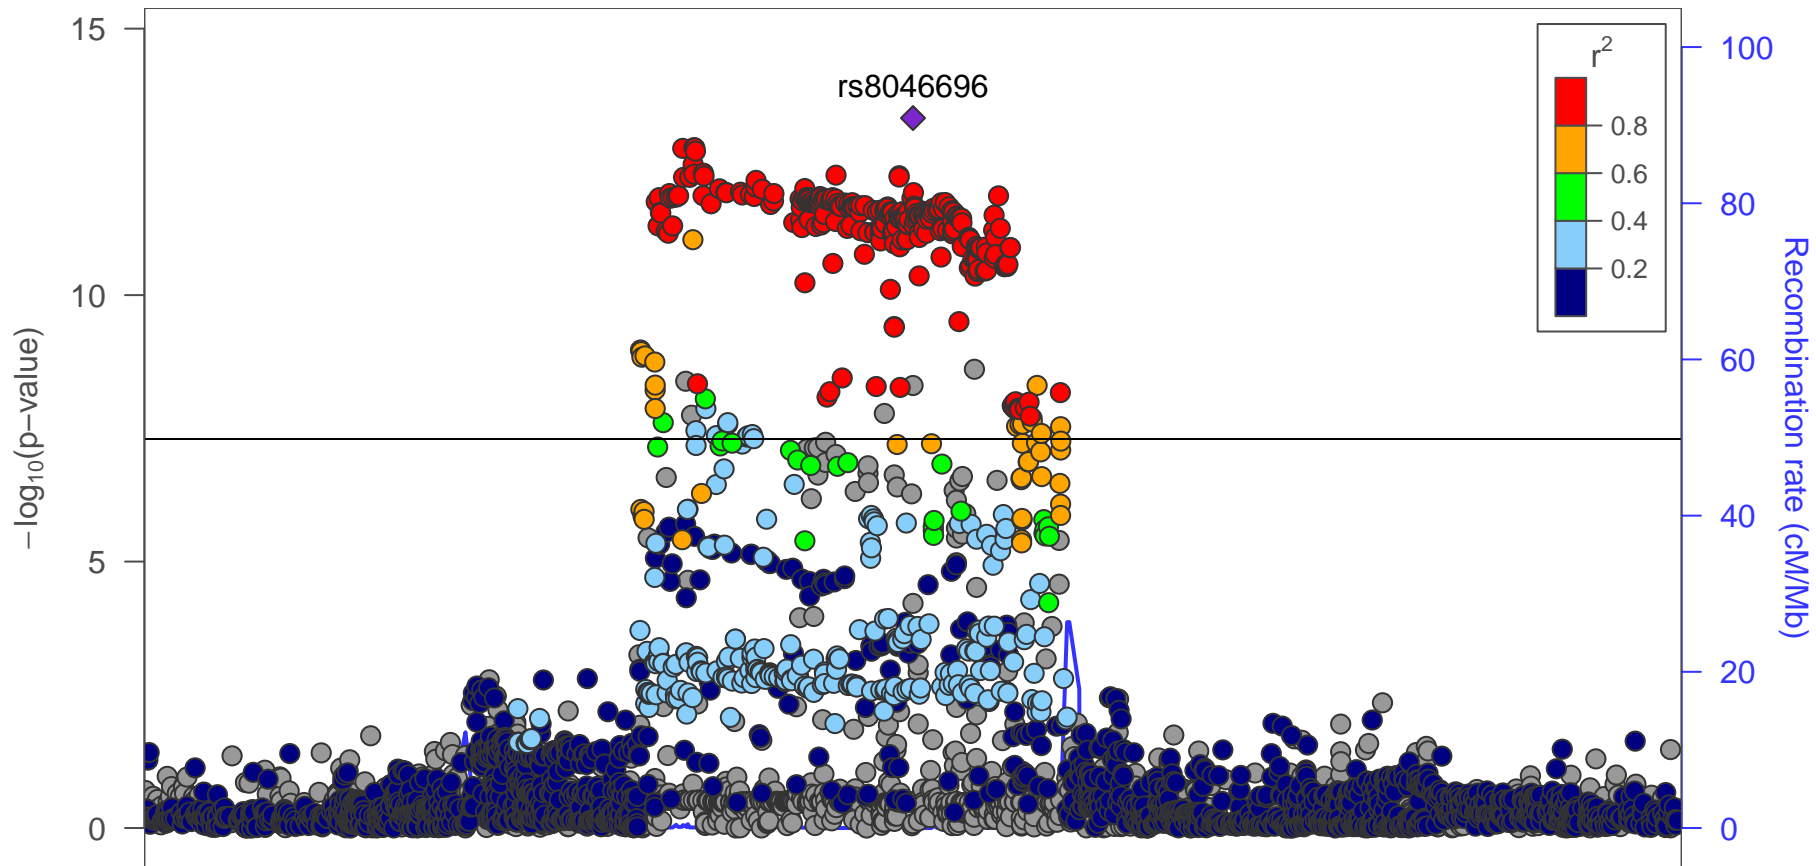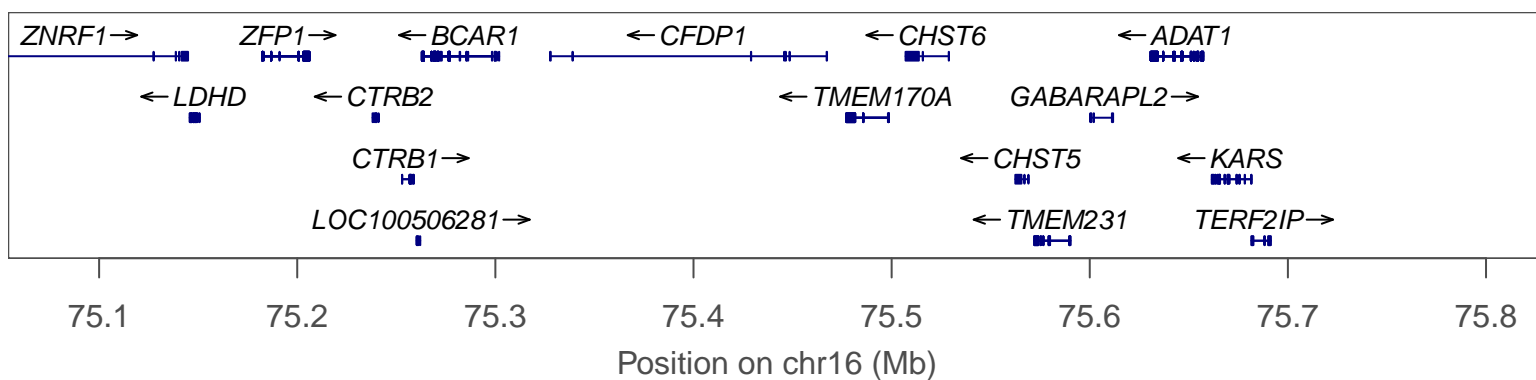

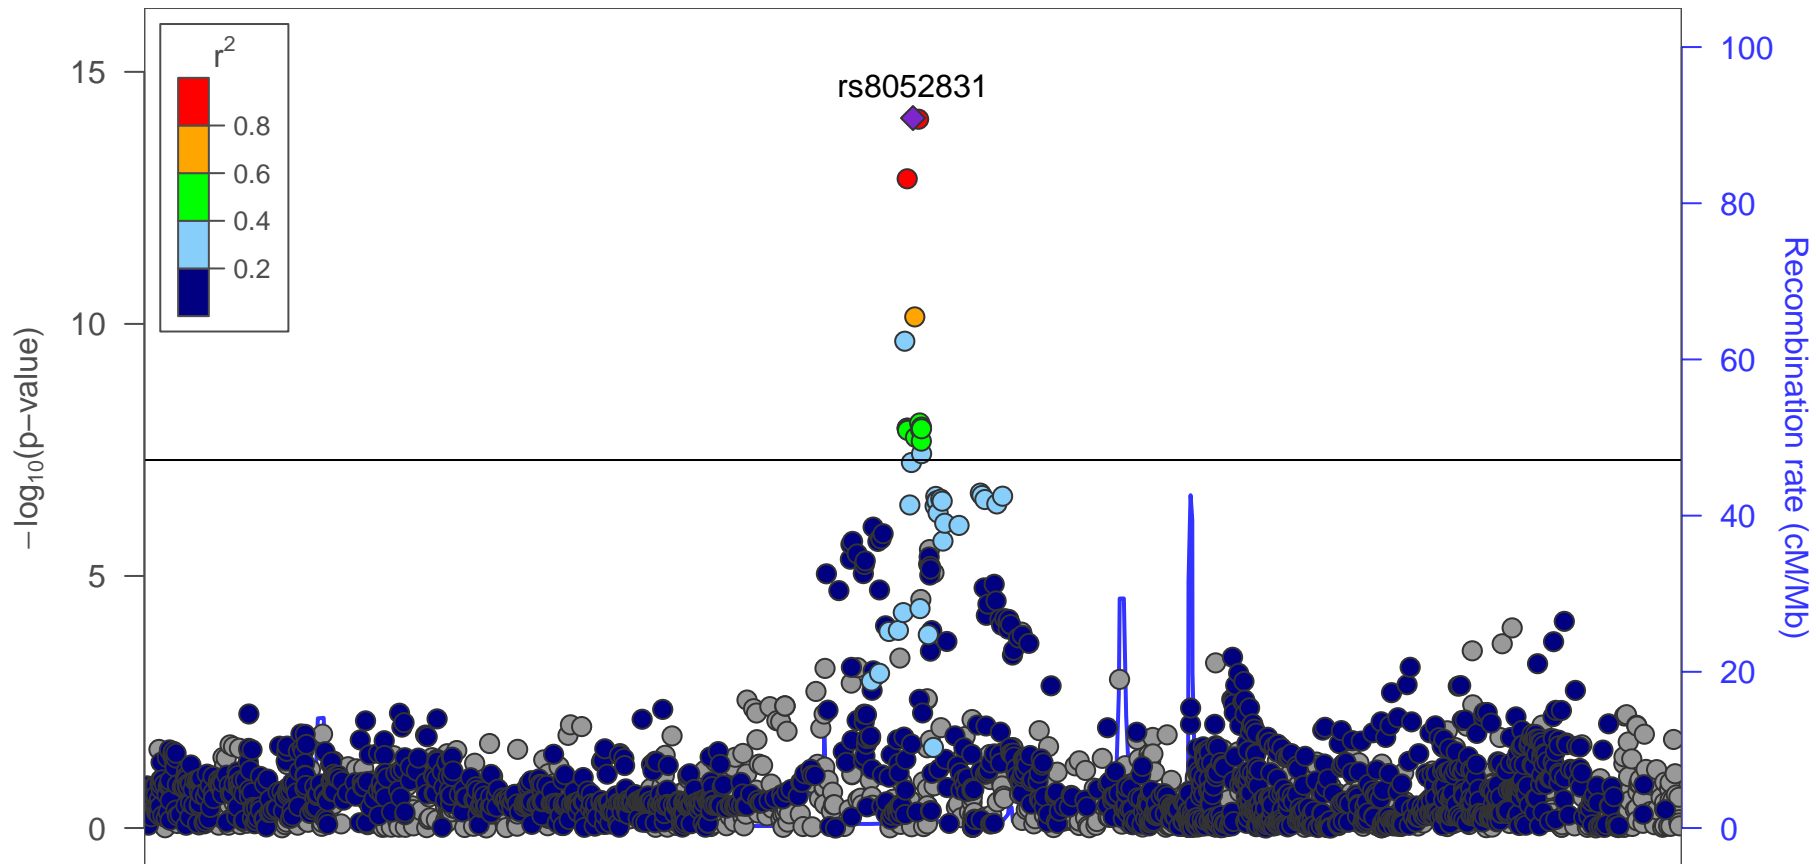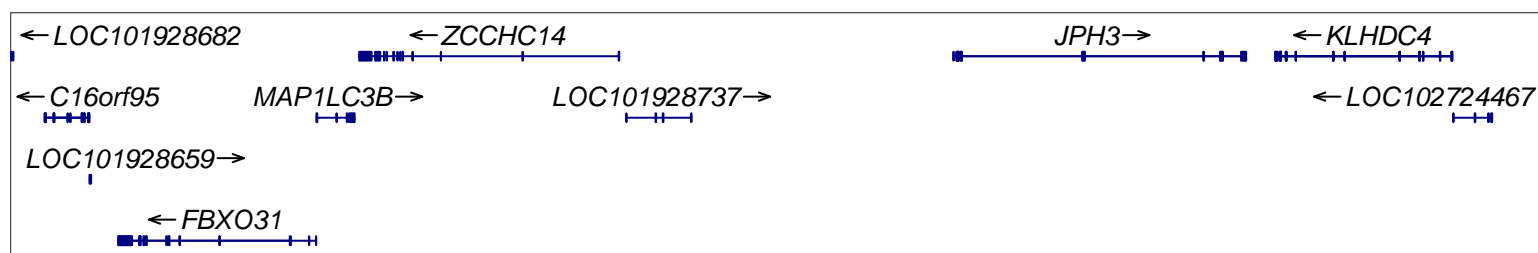

87.4

87.5

87.6

87.7

87.8

Position on chr16 (Mb)

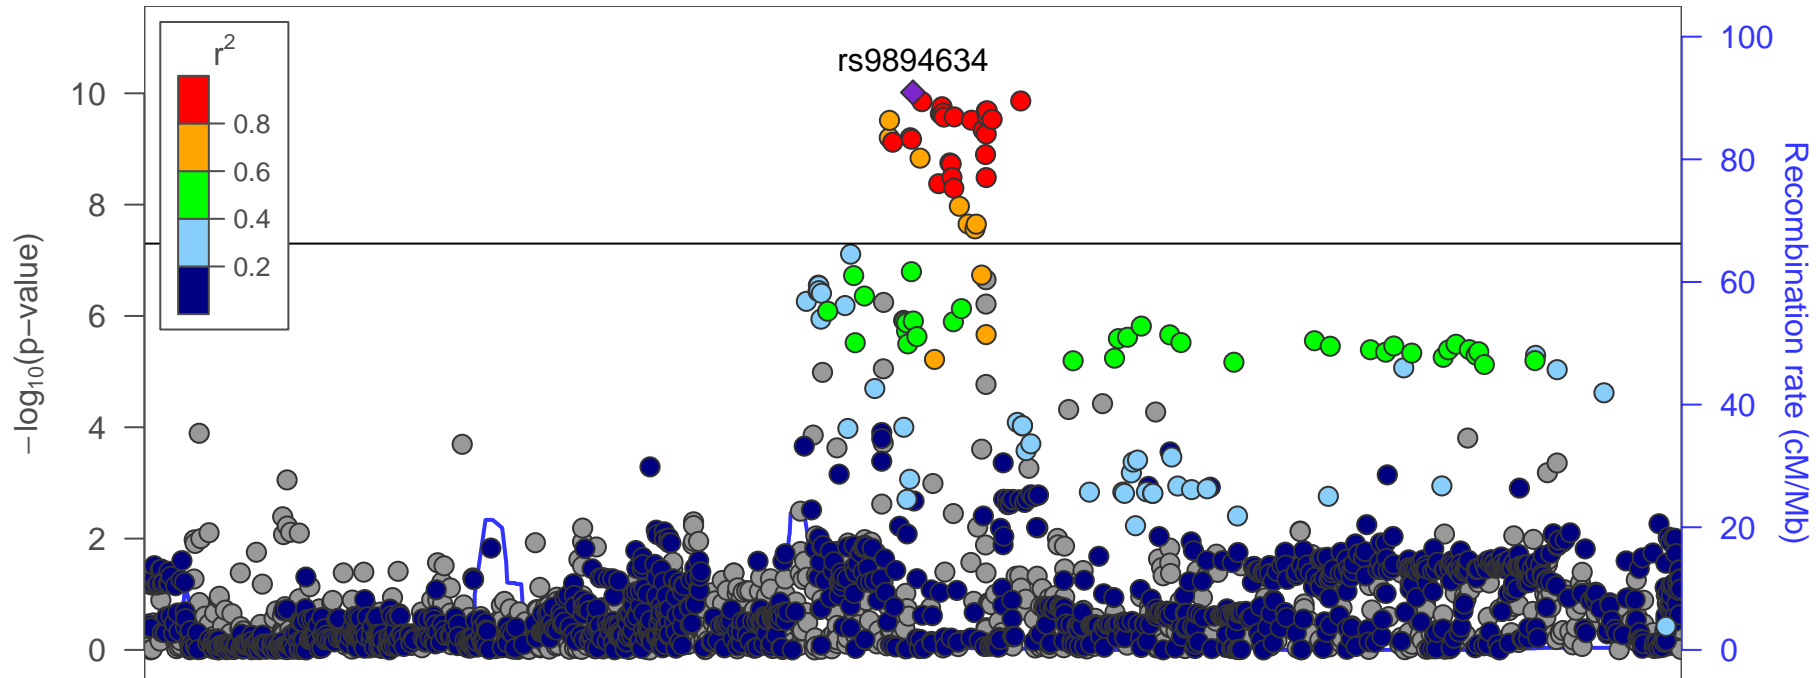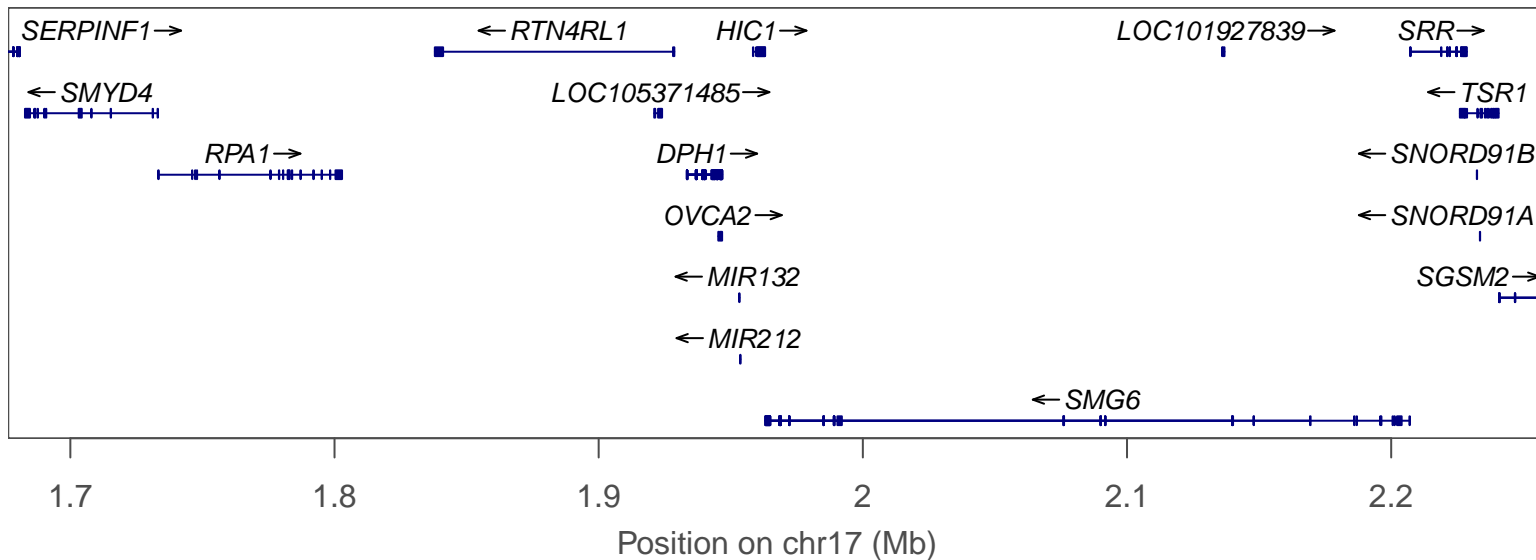

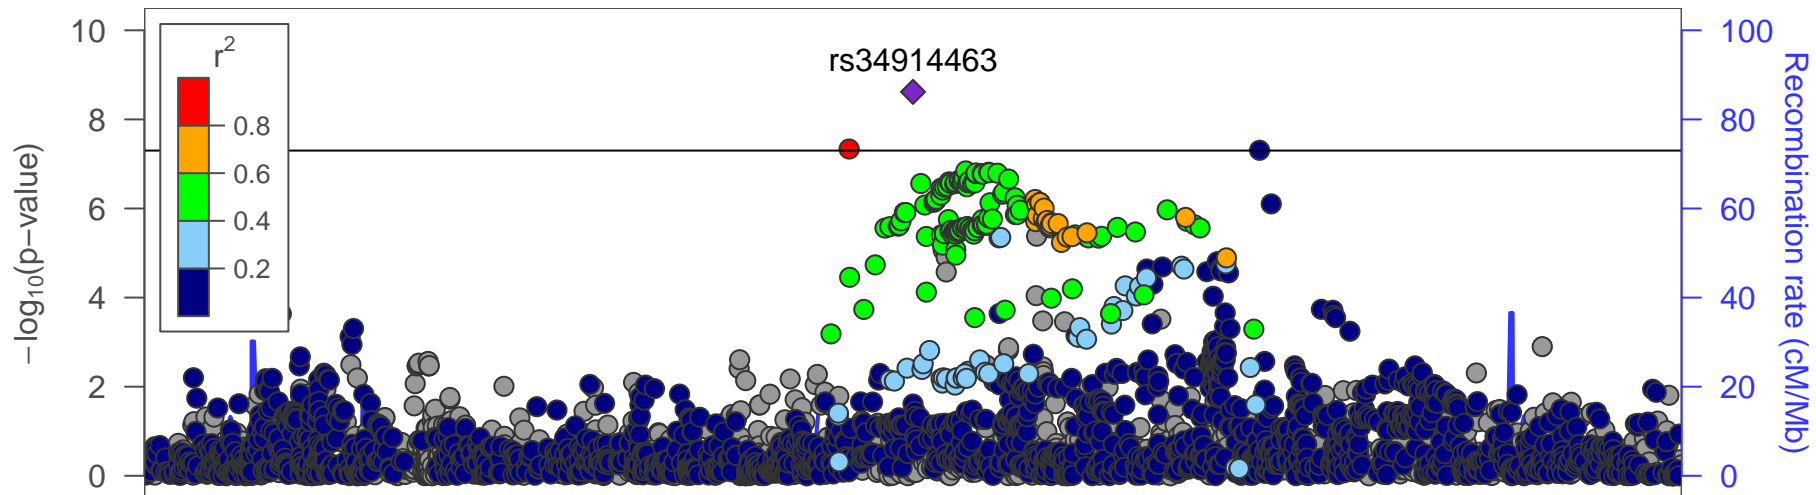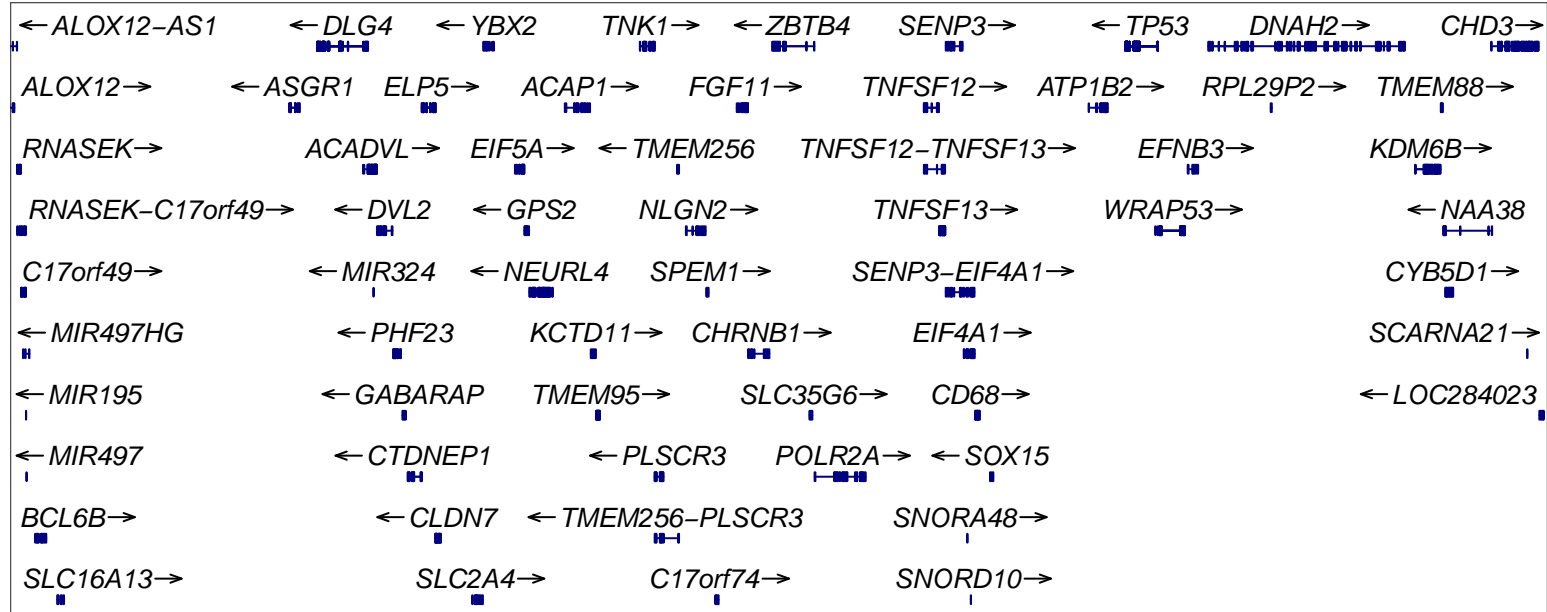

10 genes omitted

Position on chr17 (Mb)

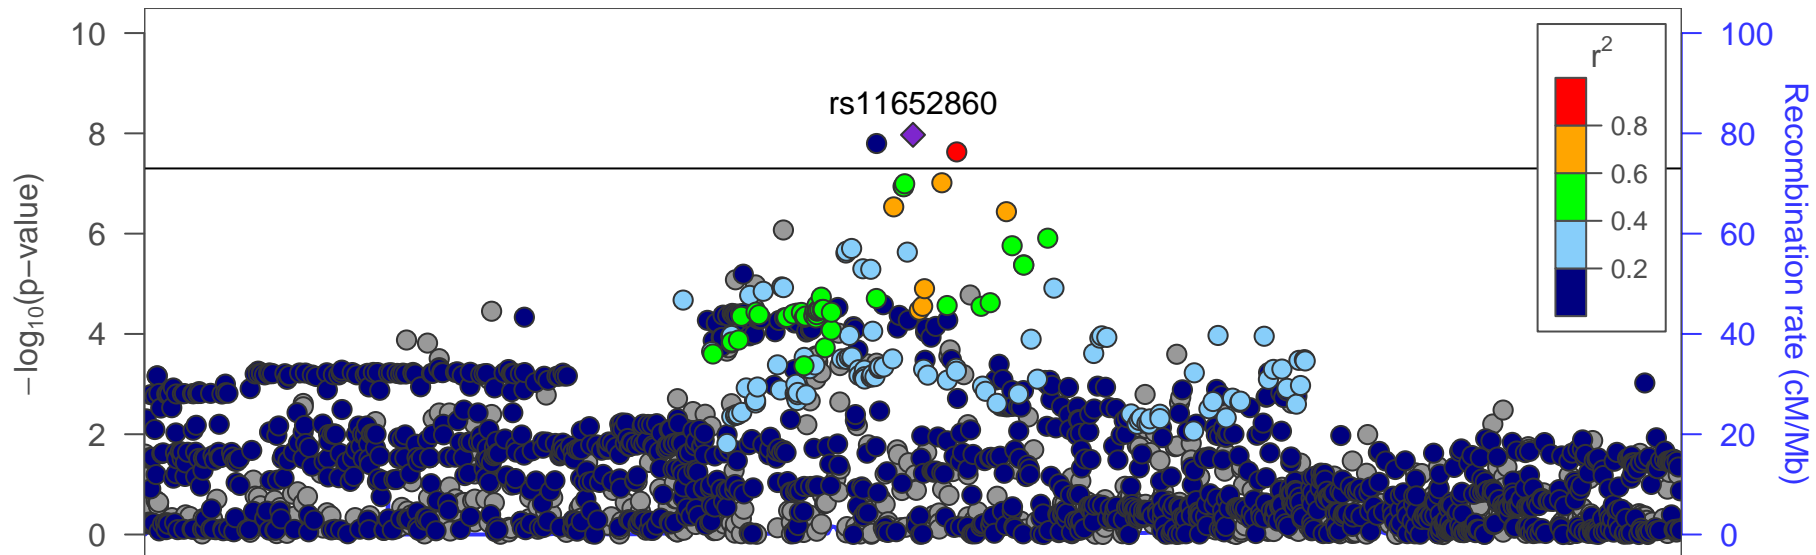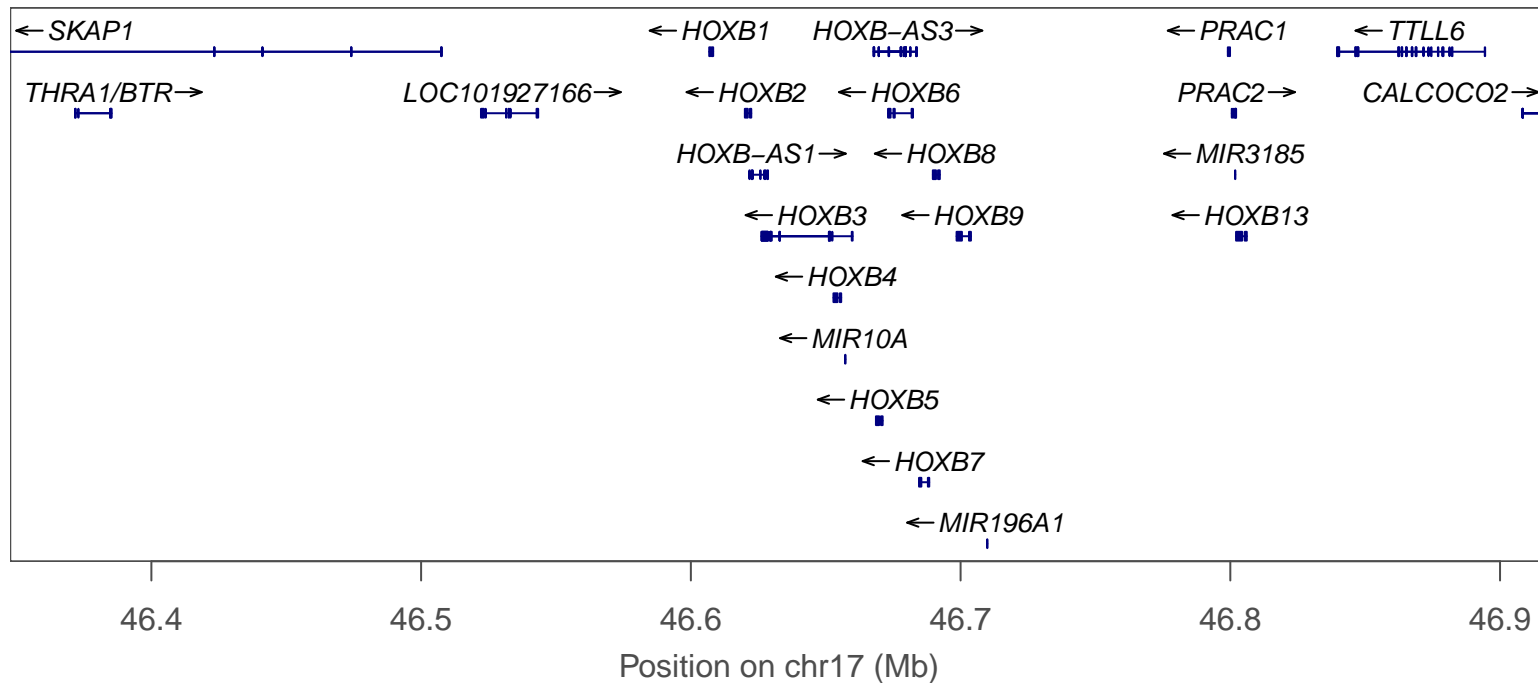



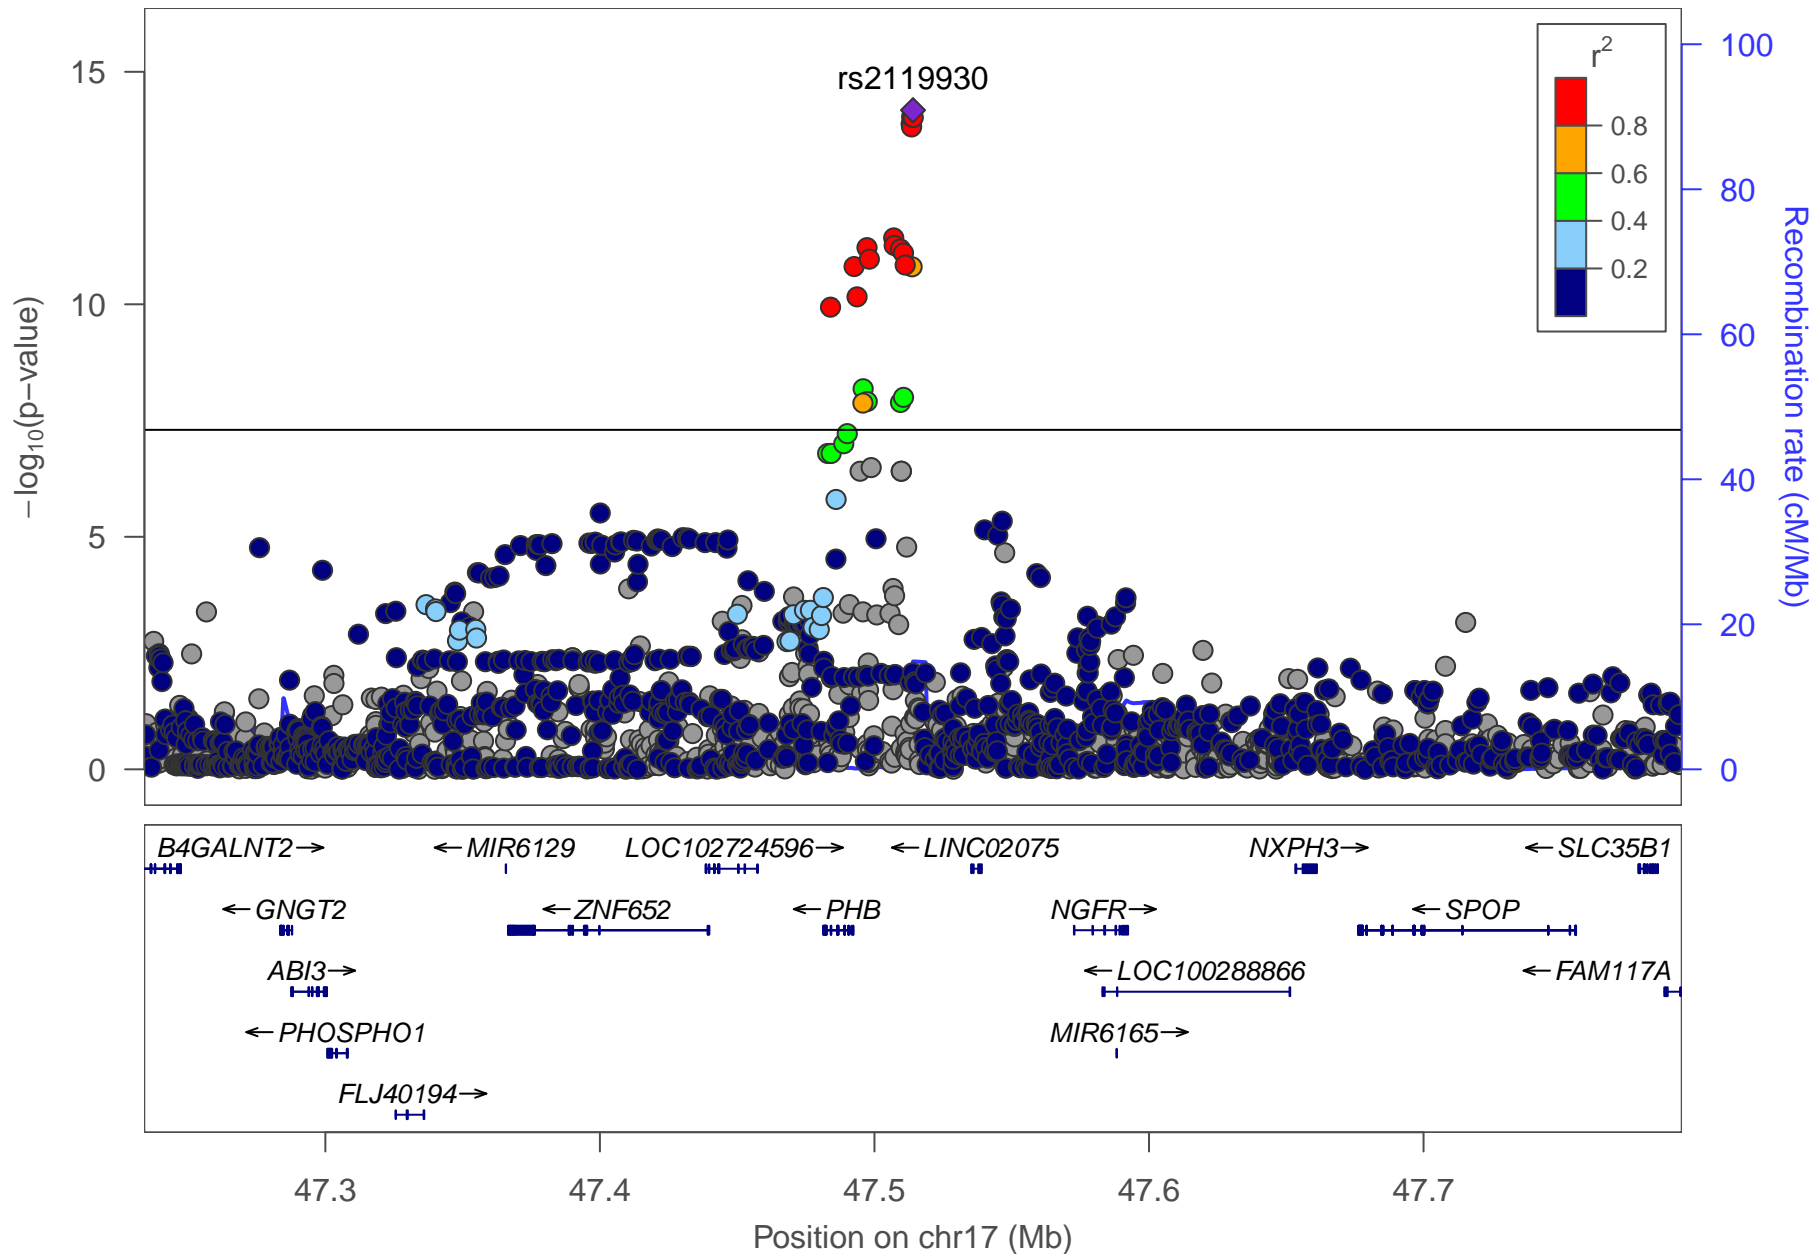

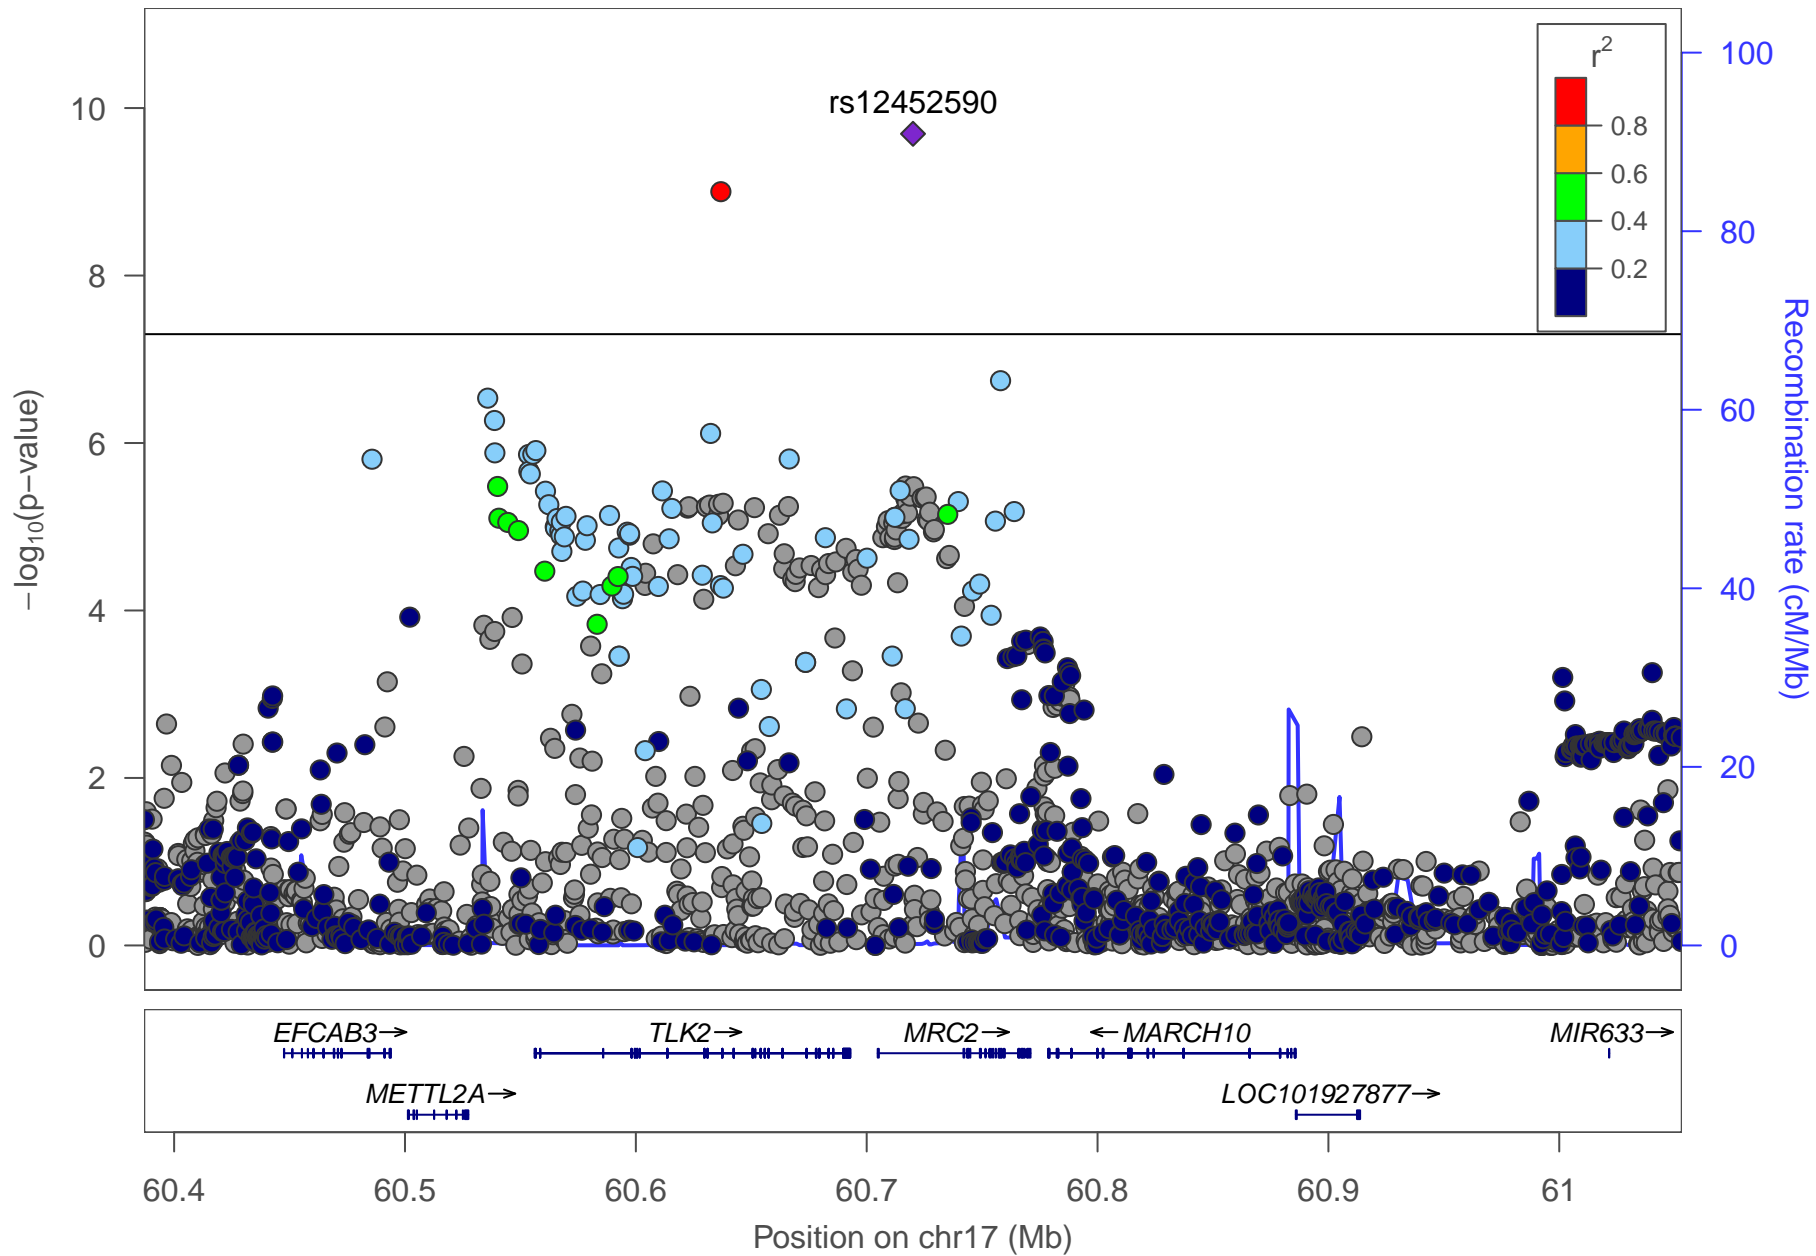

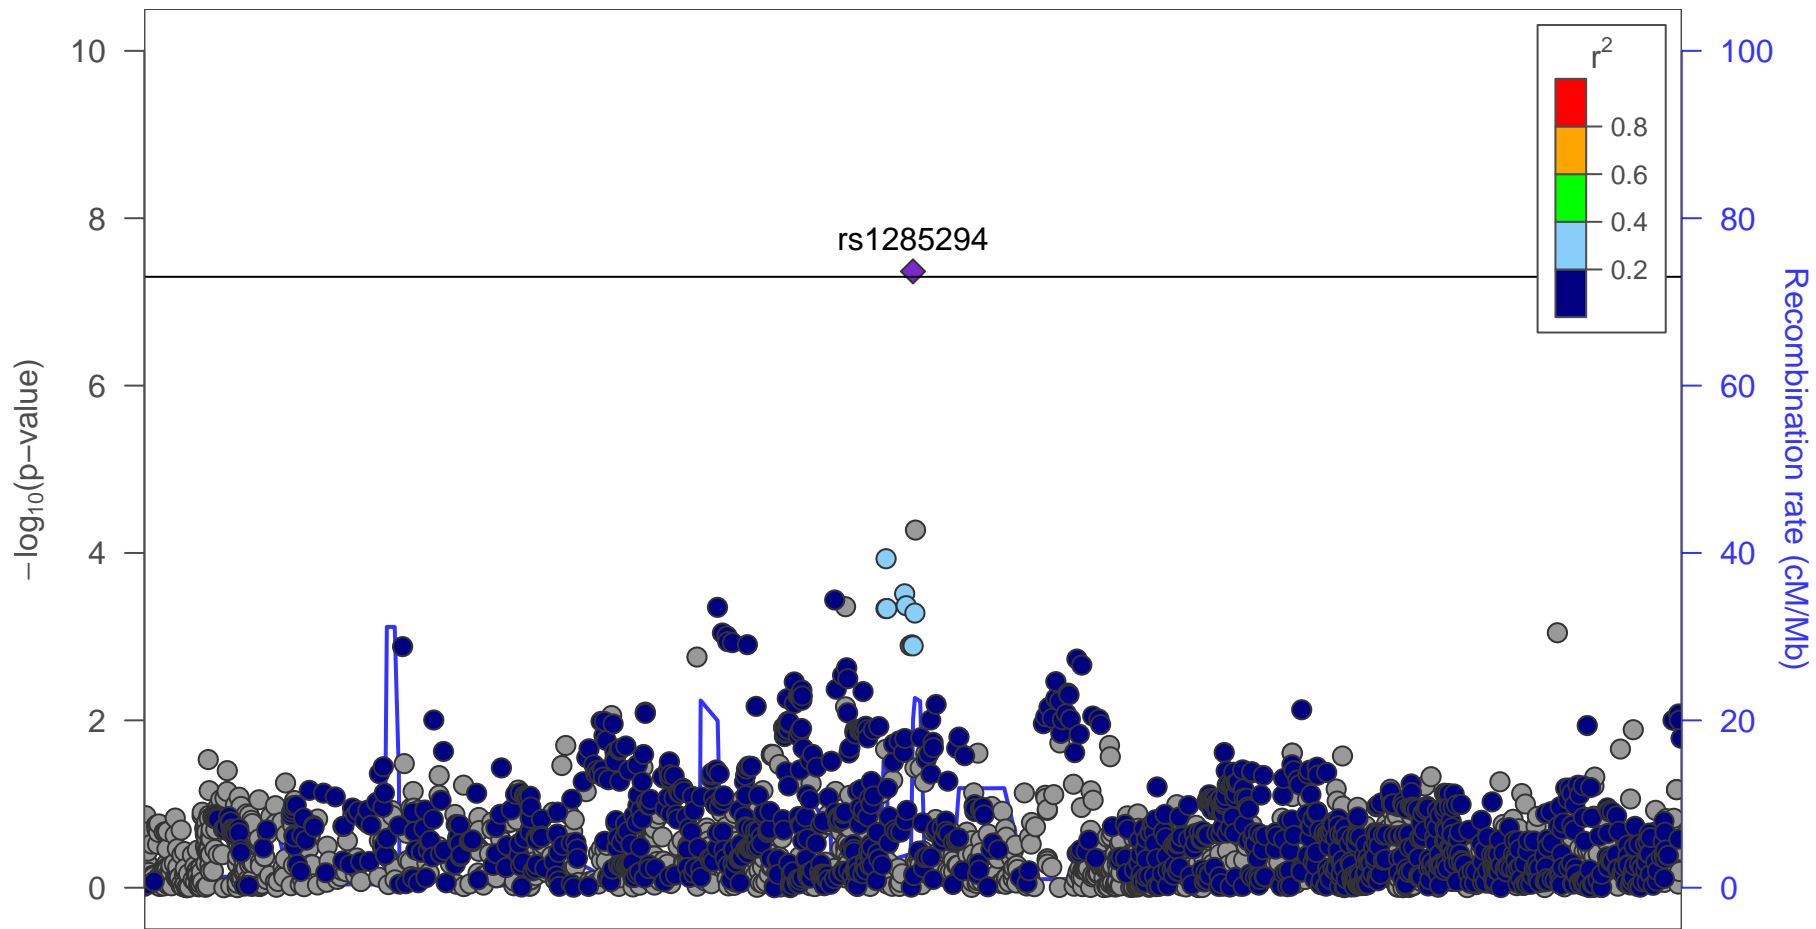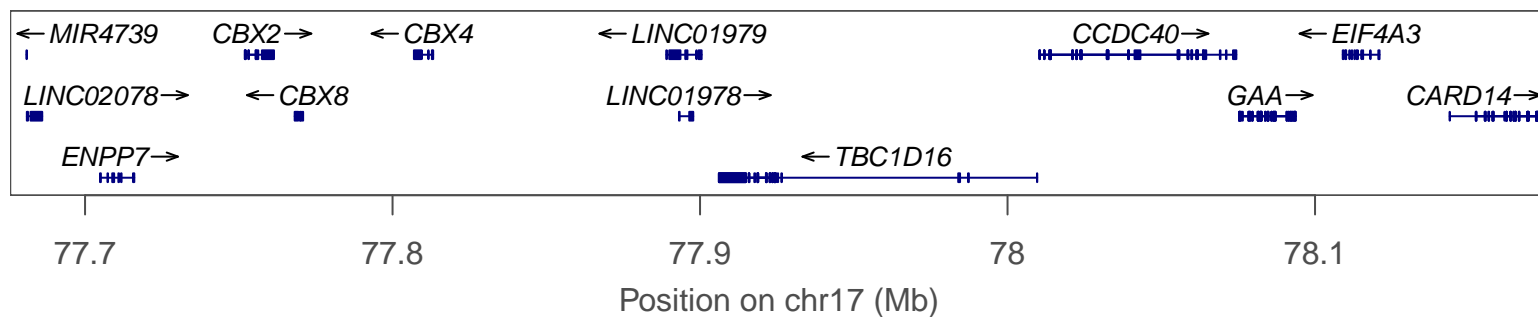

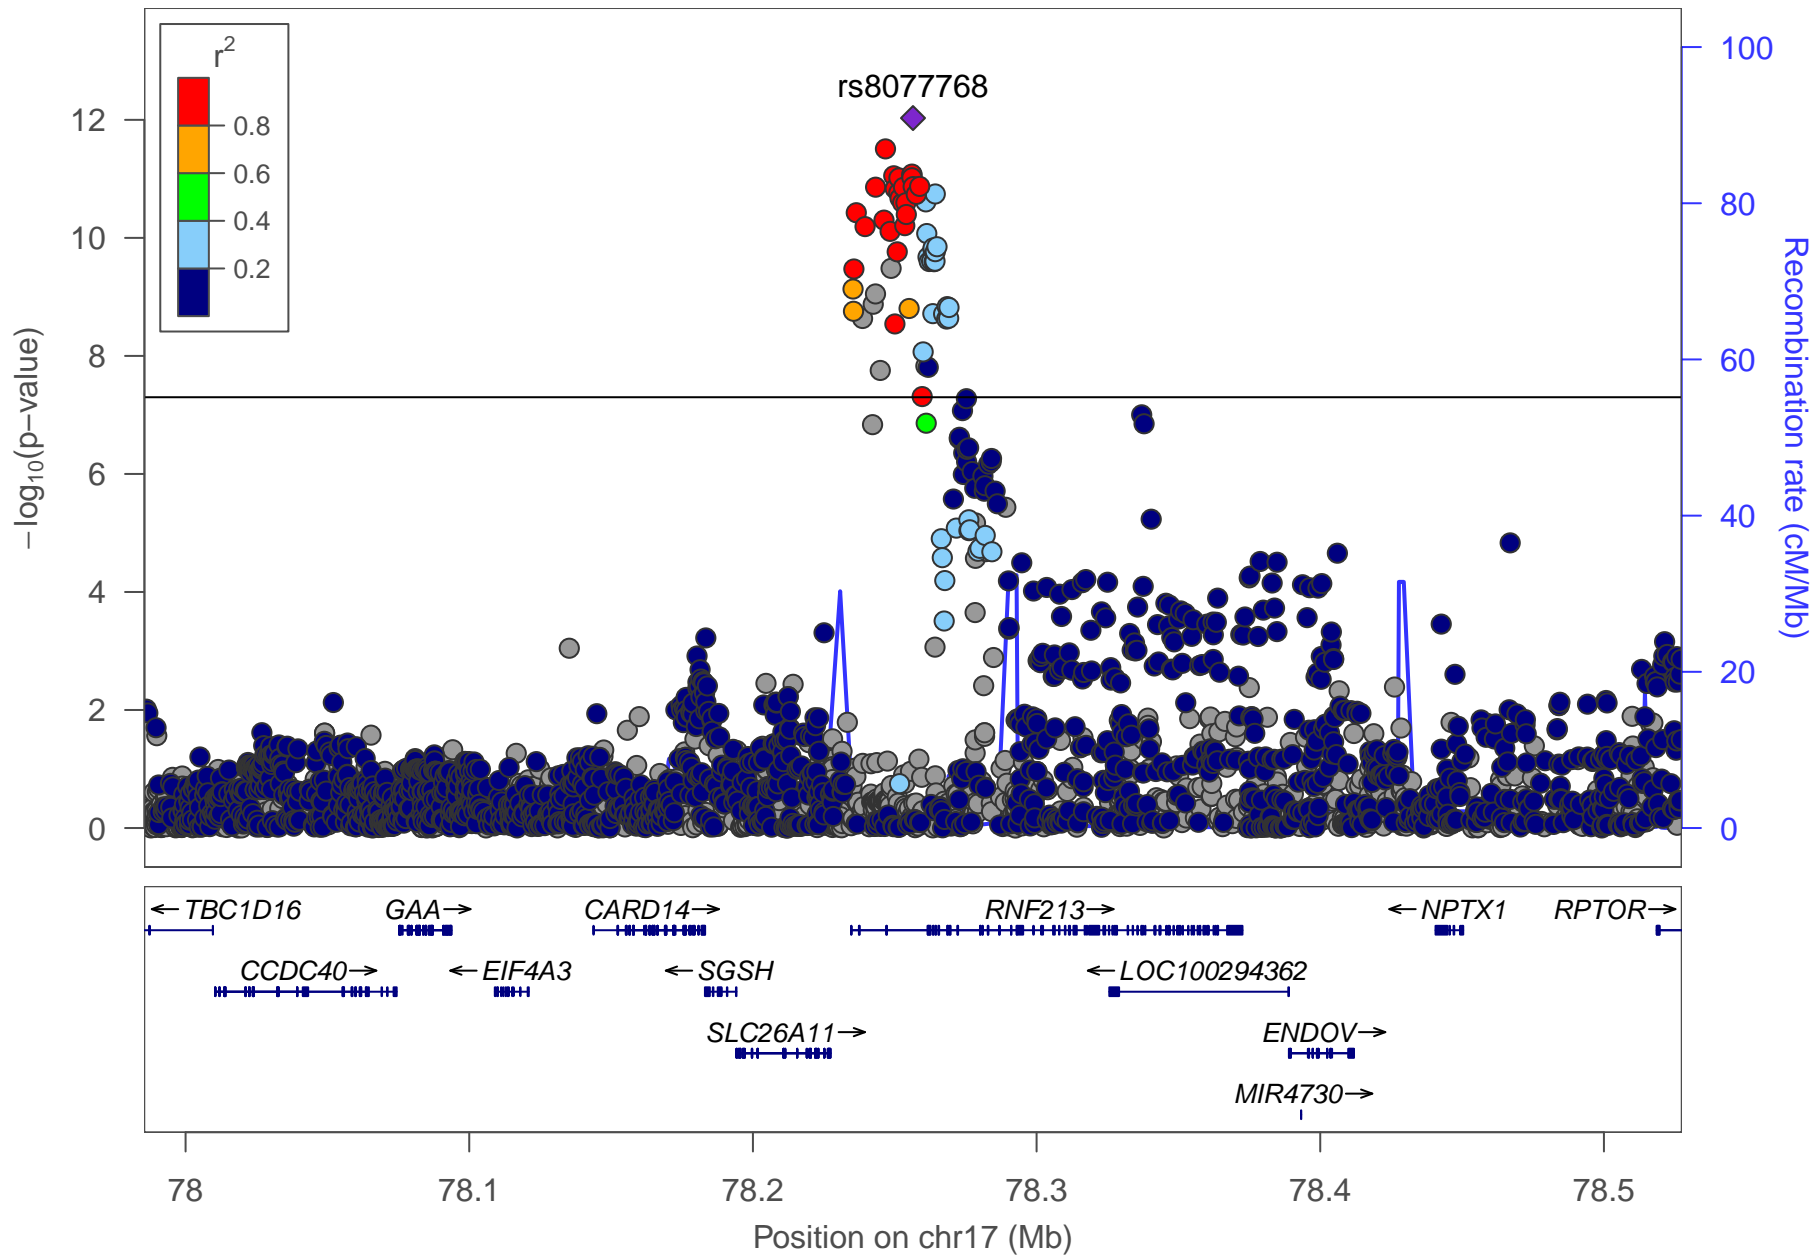

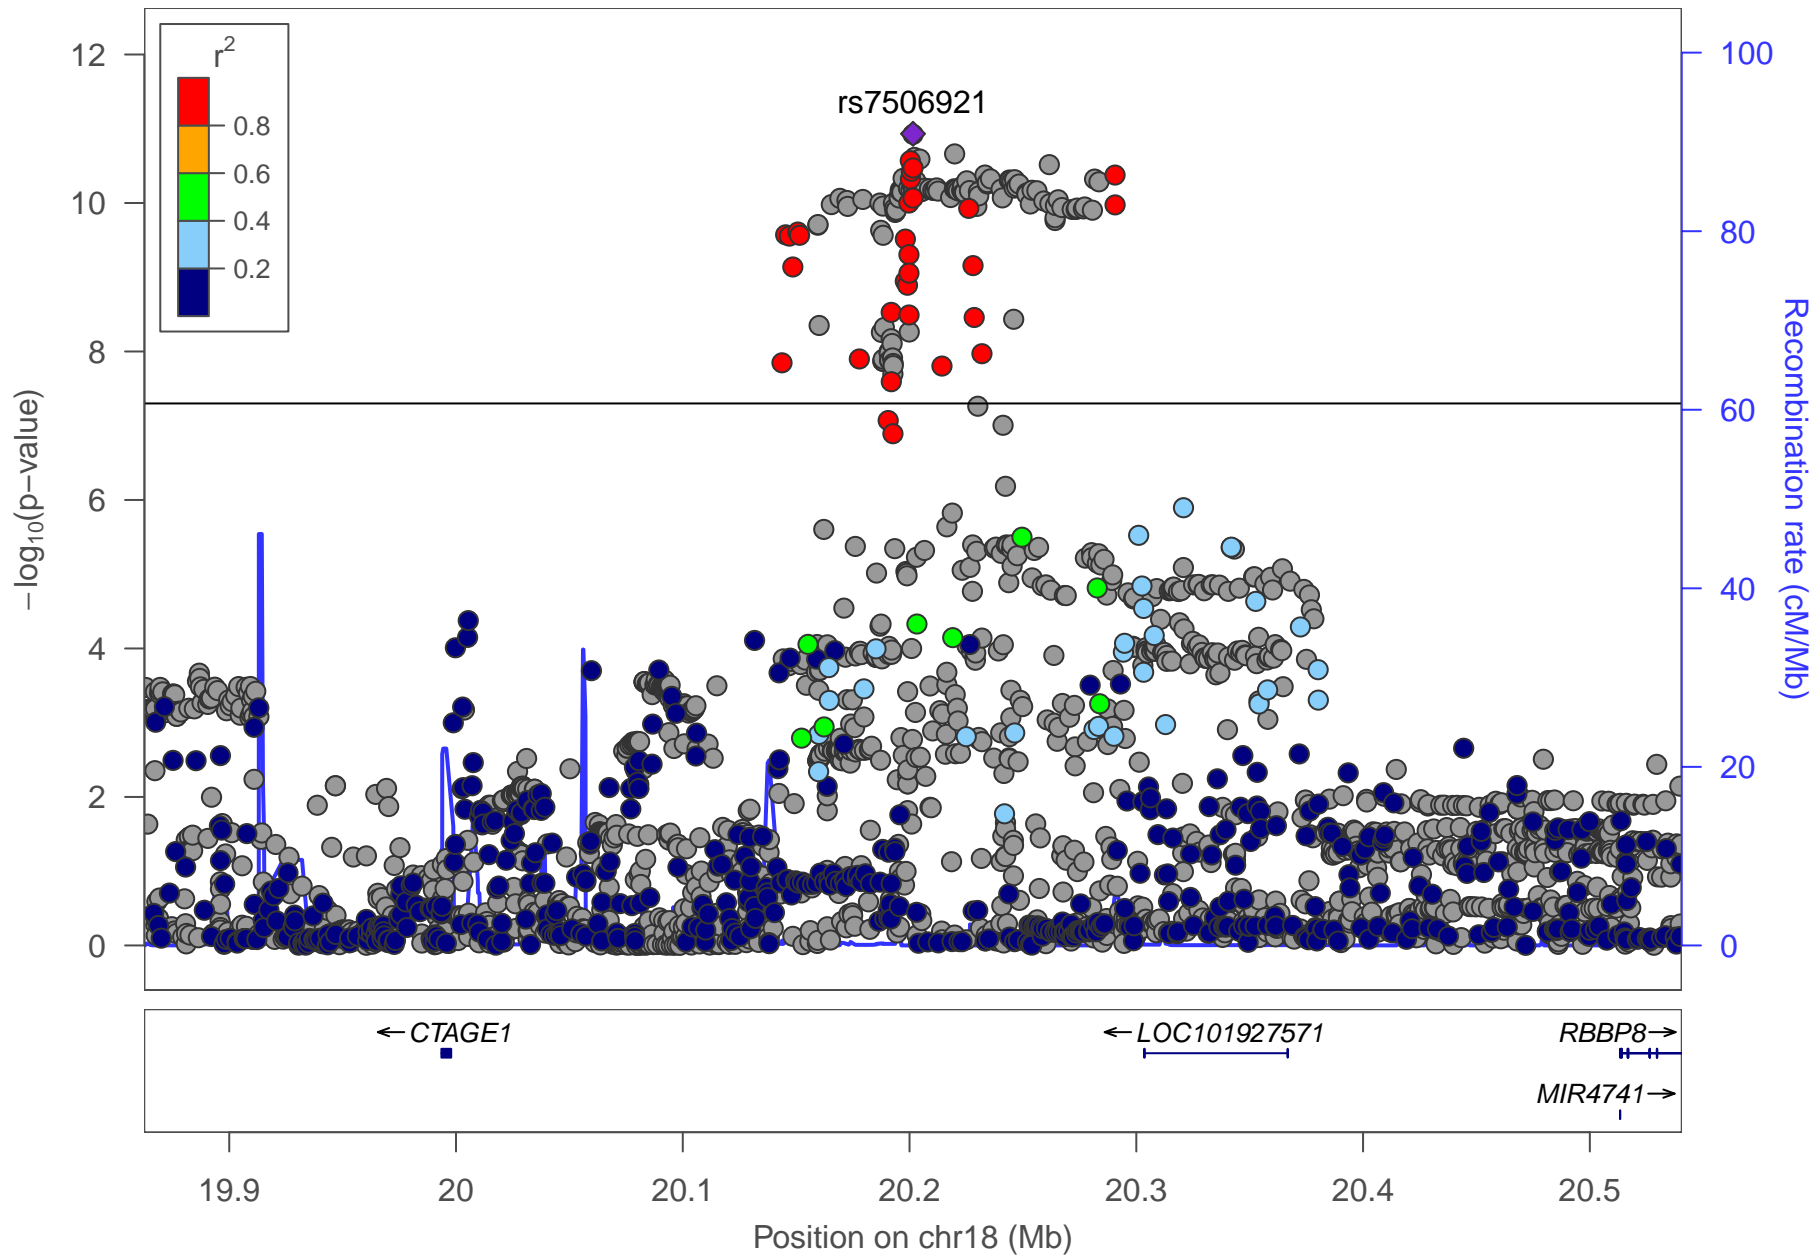

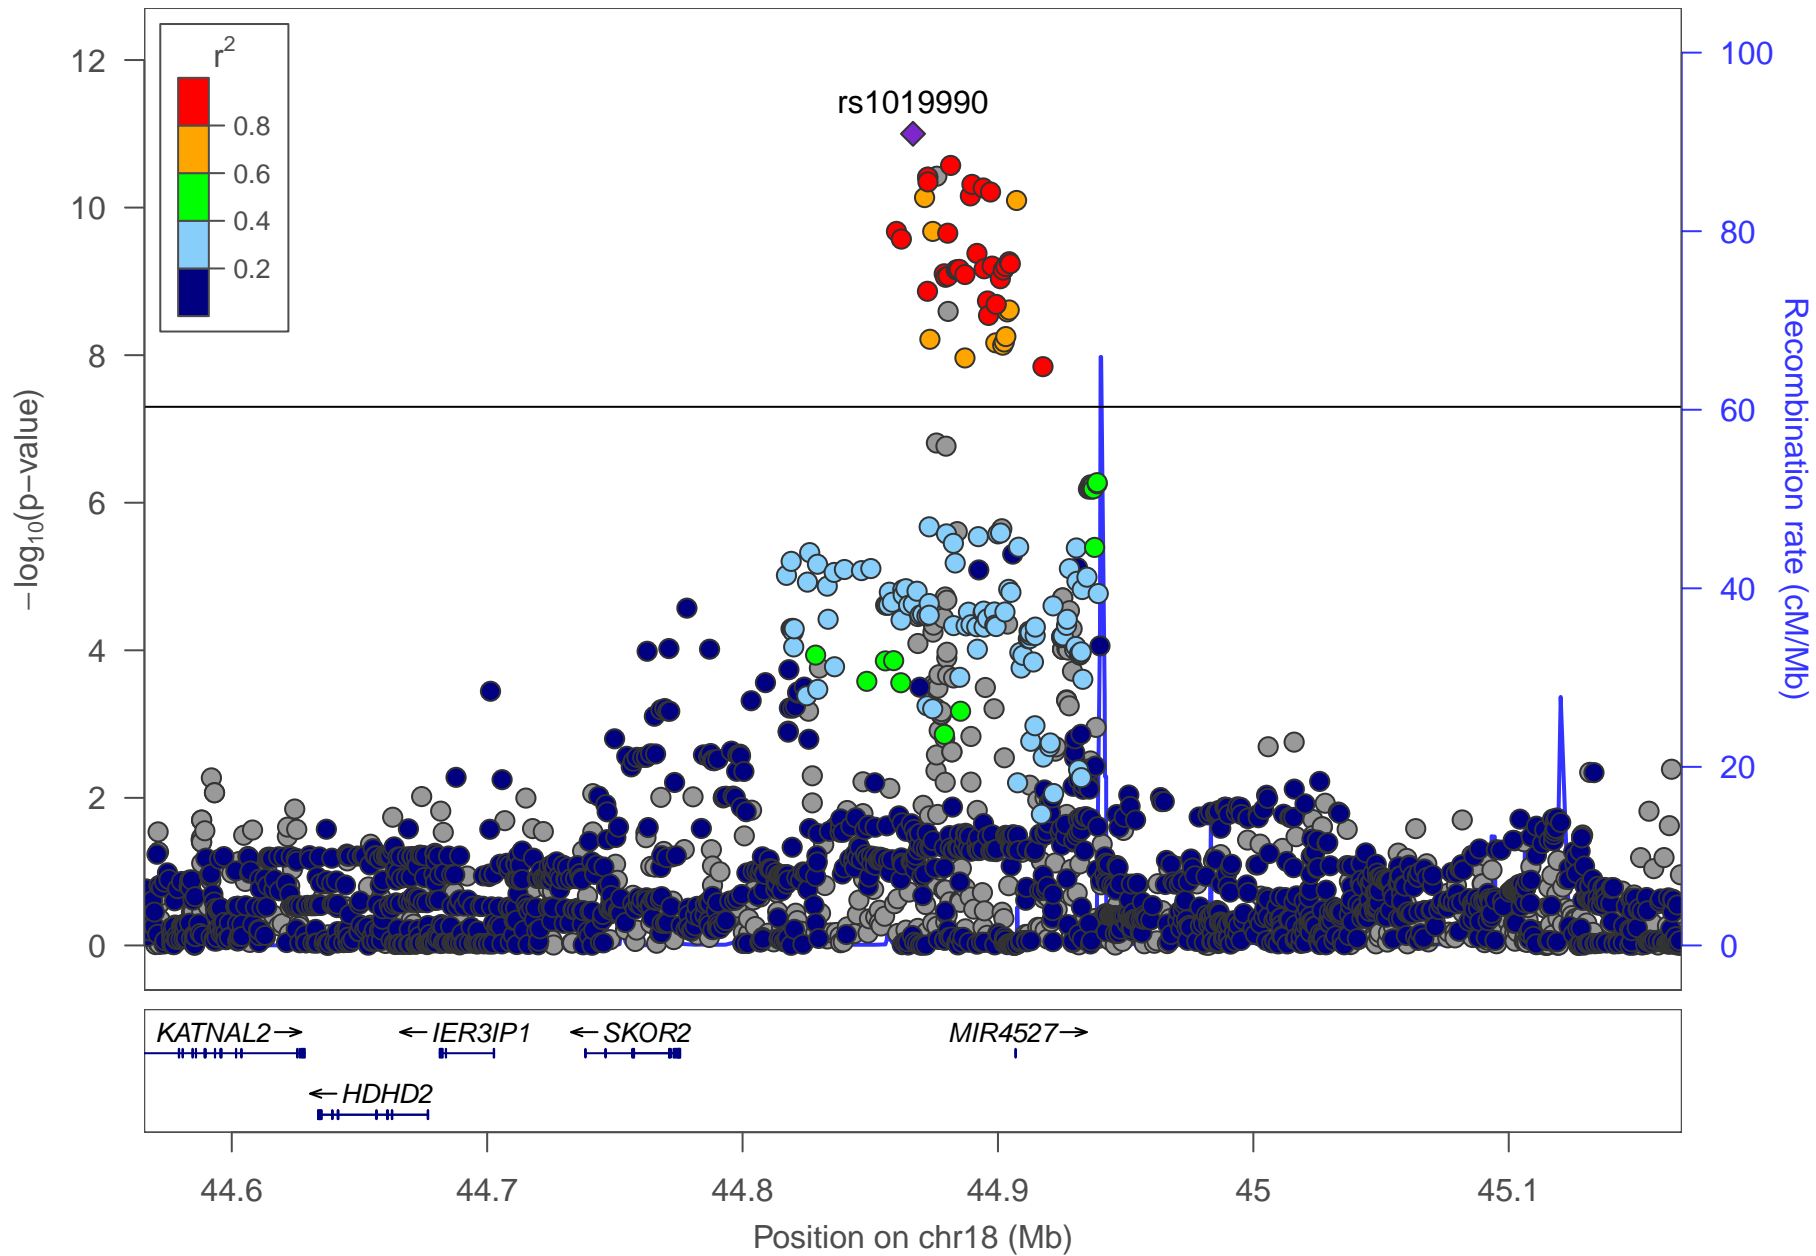

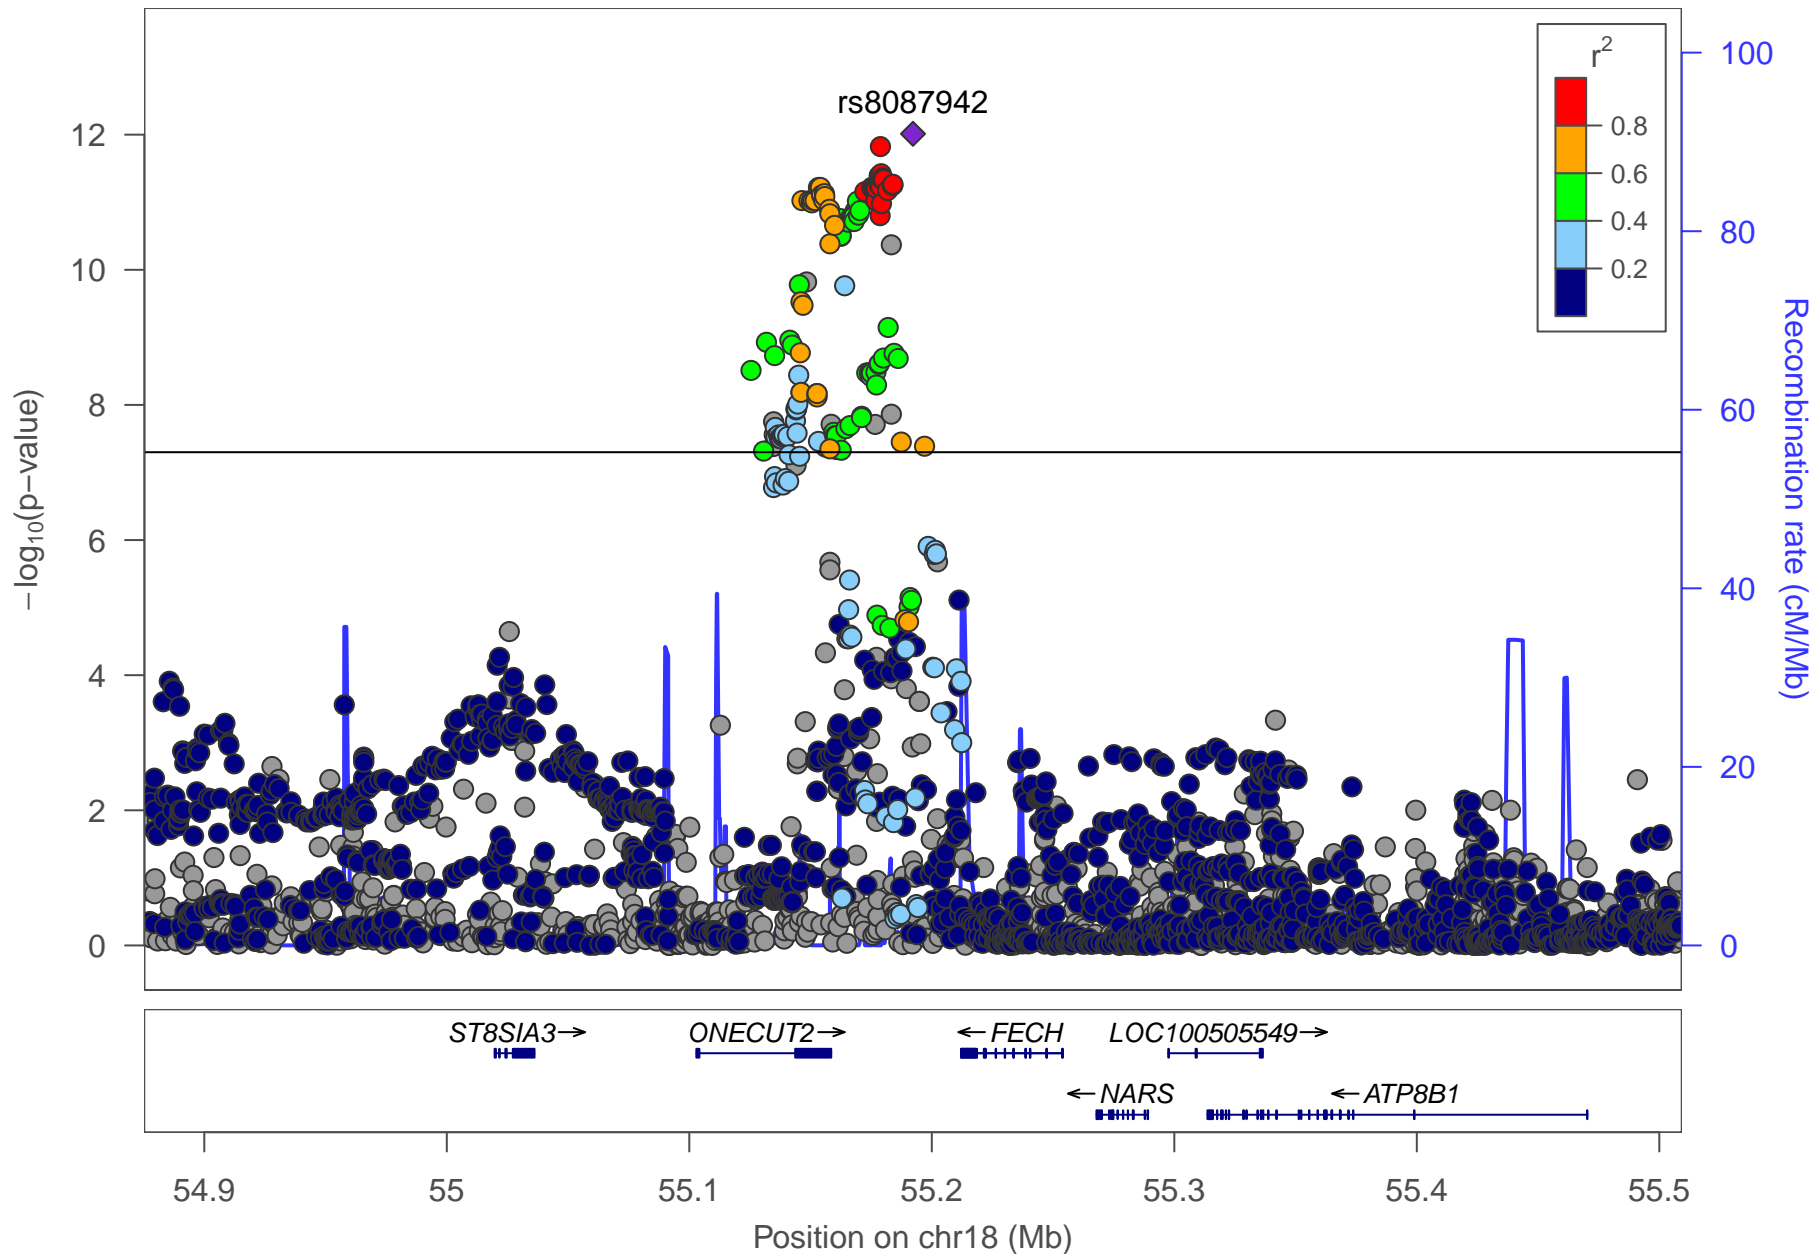

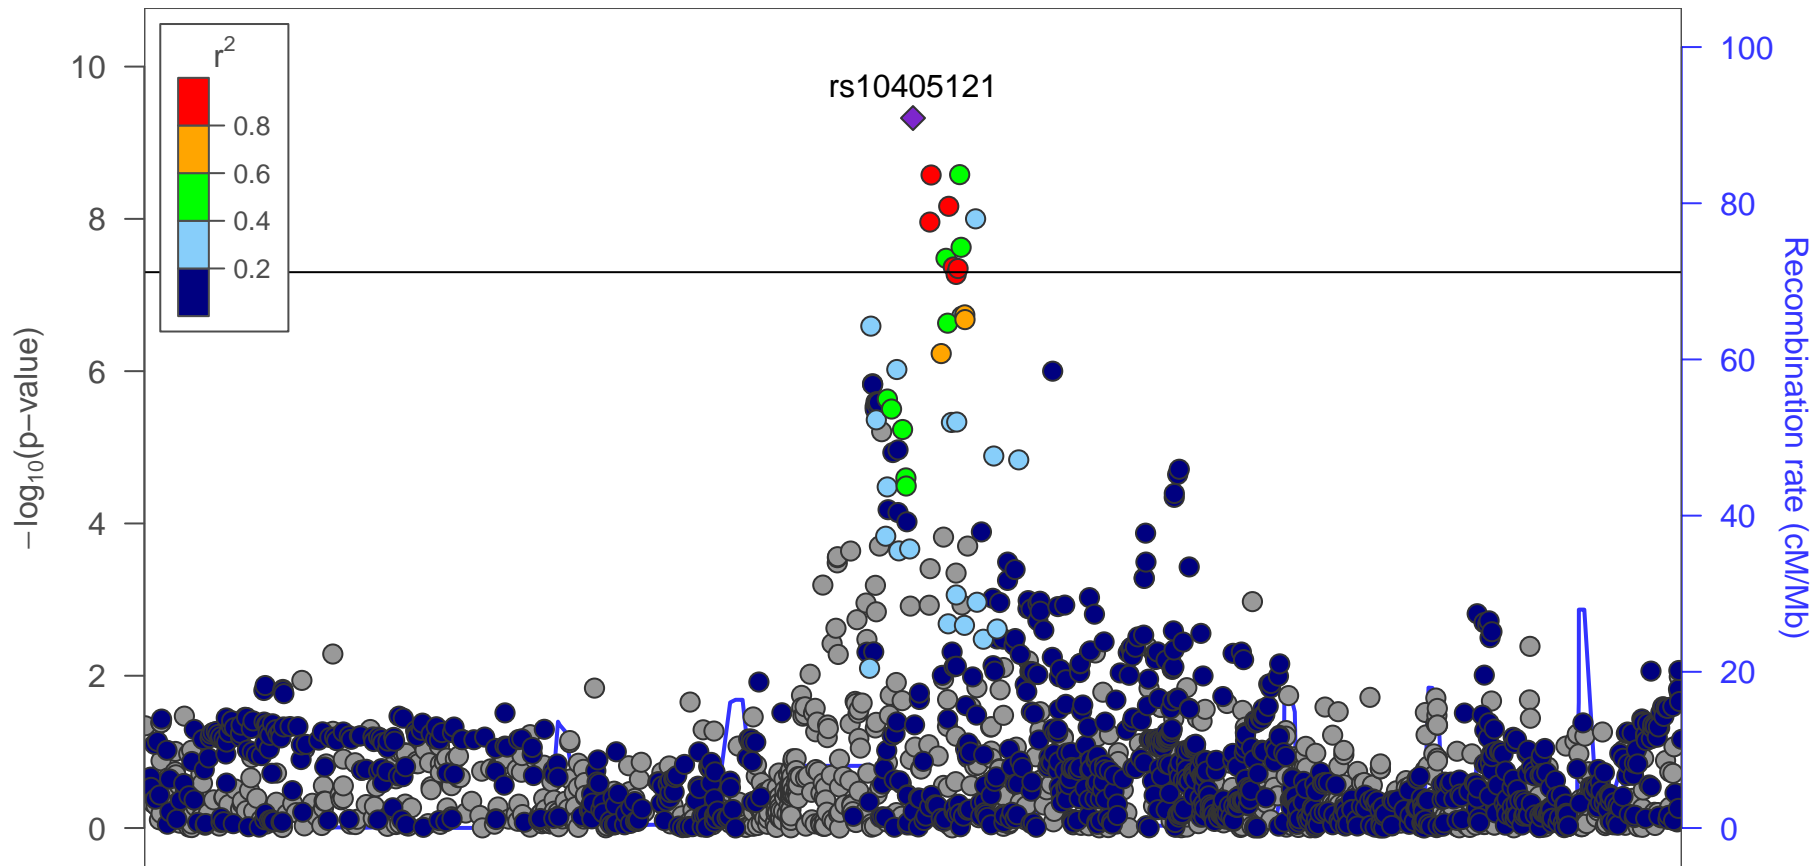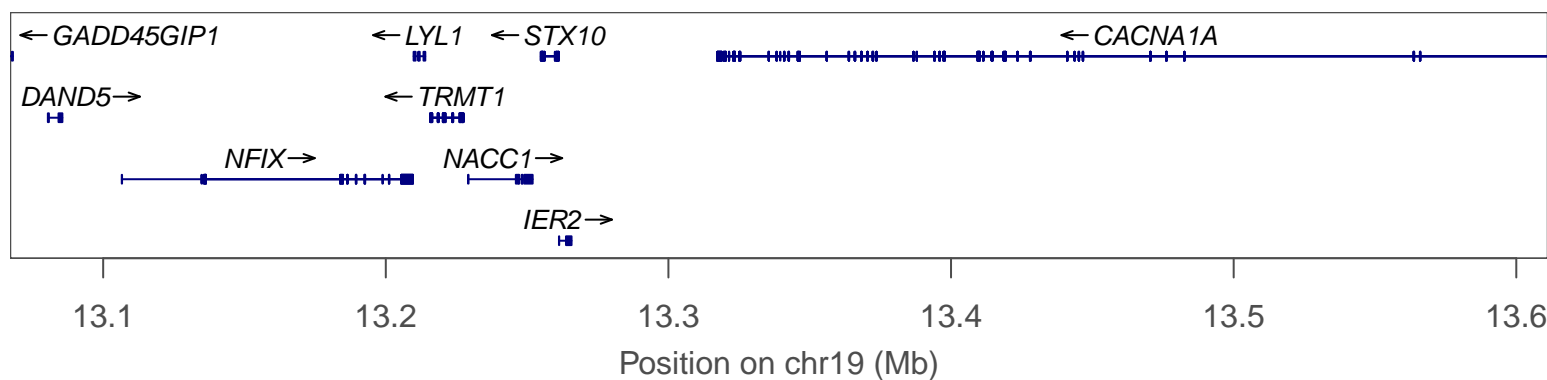



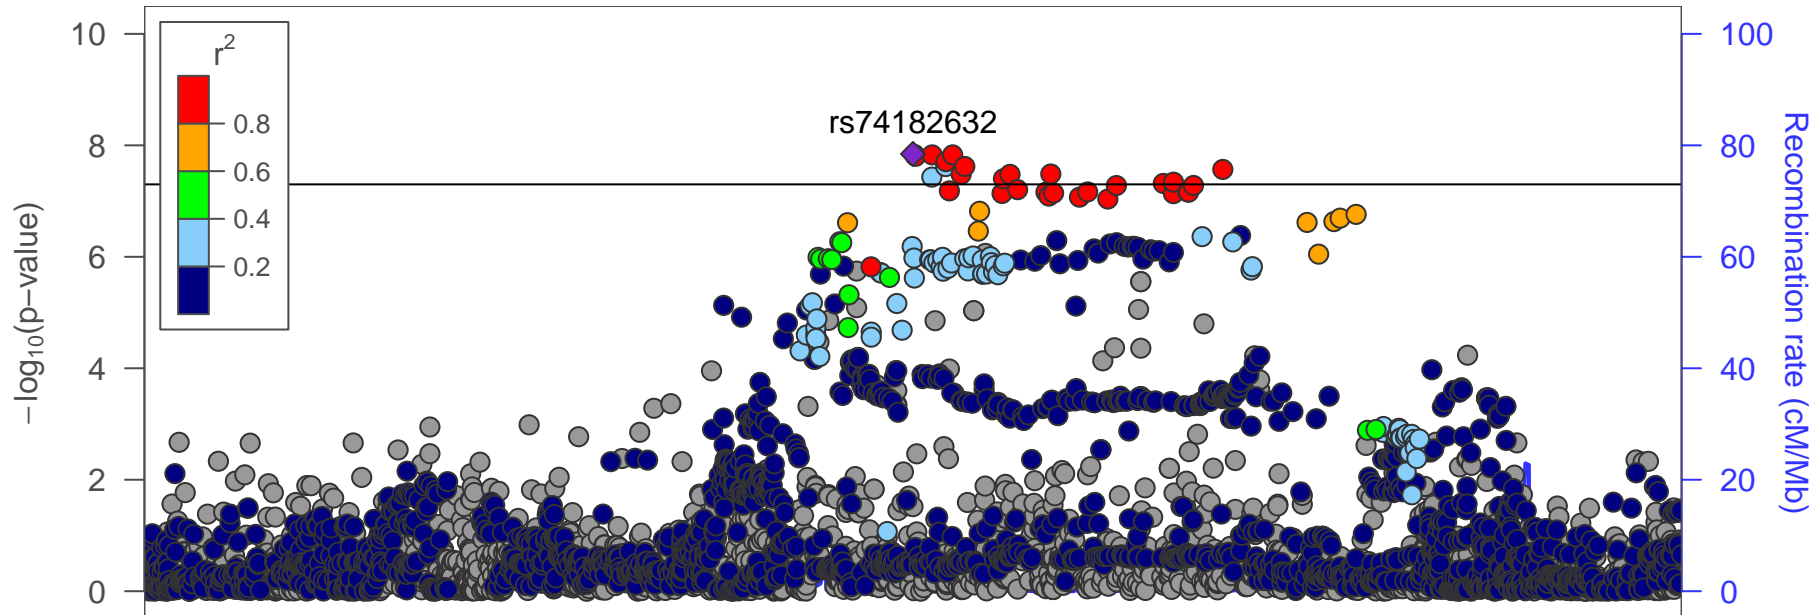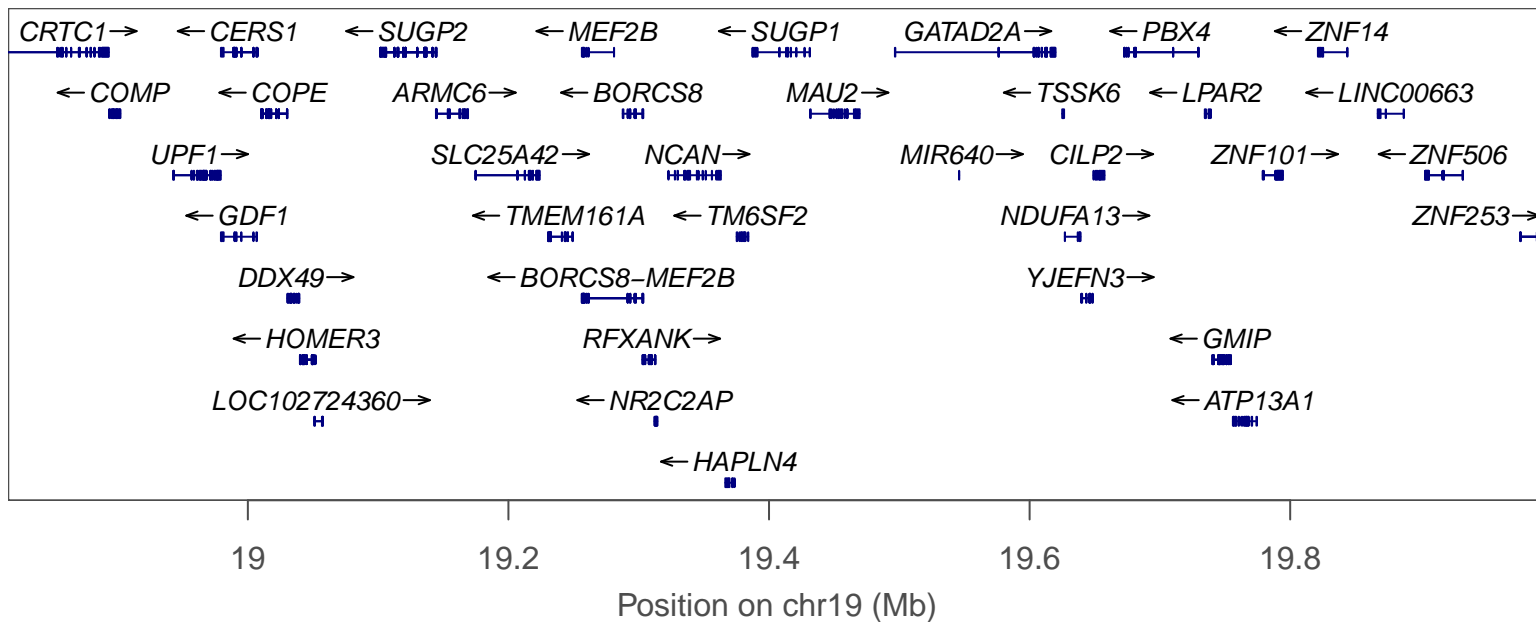

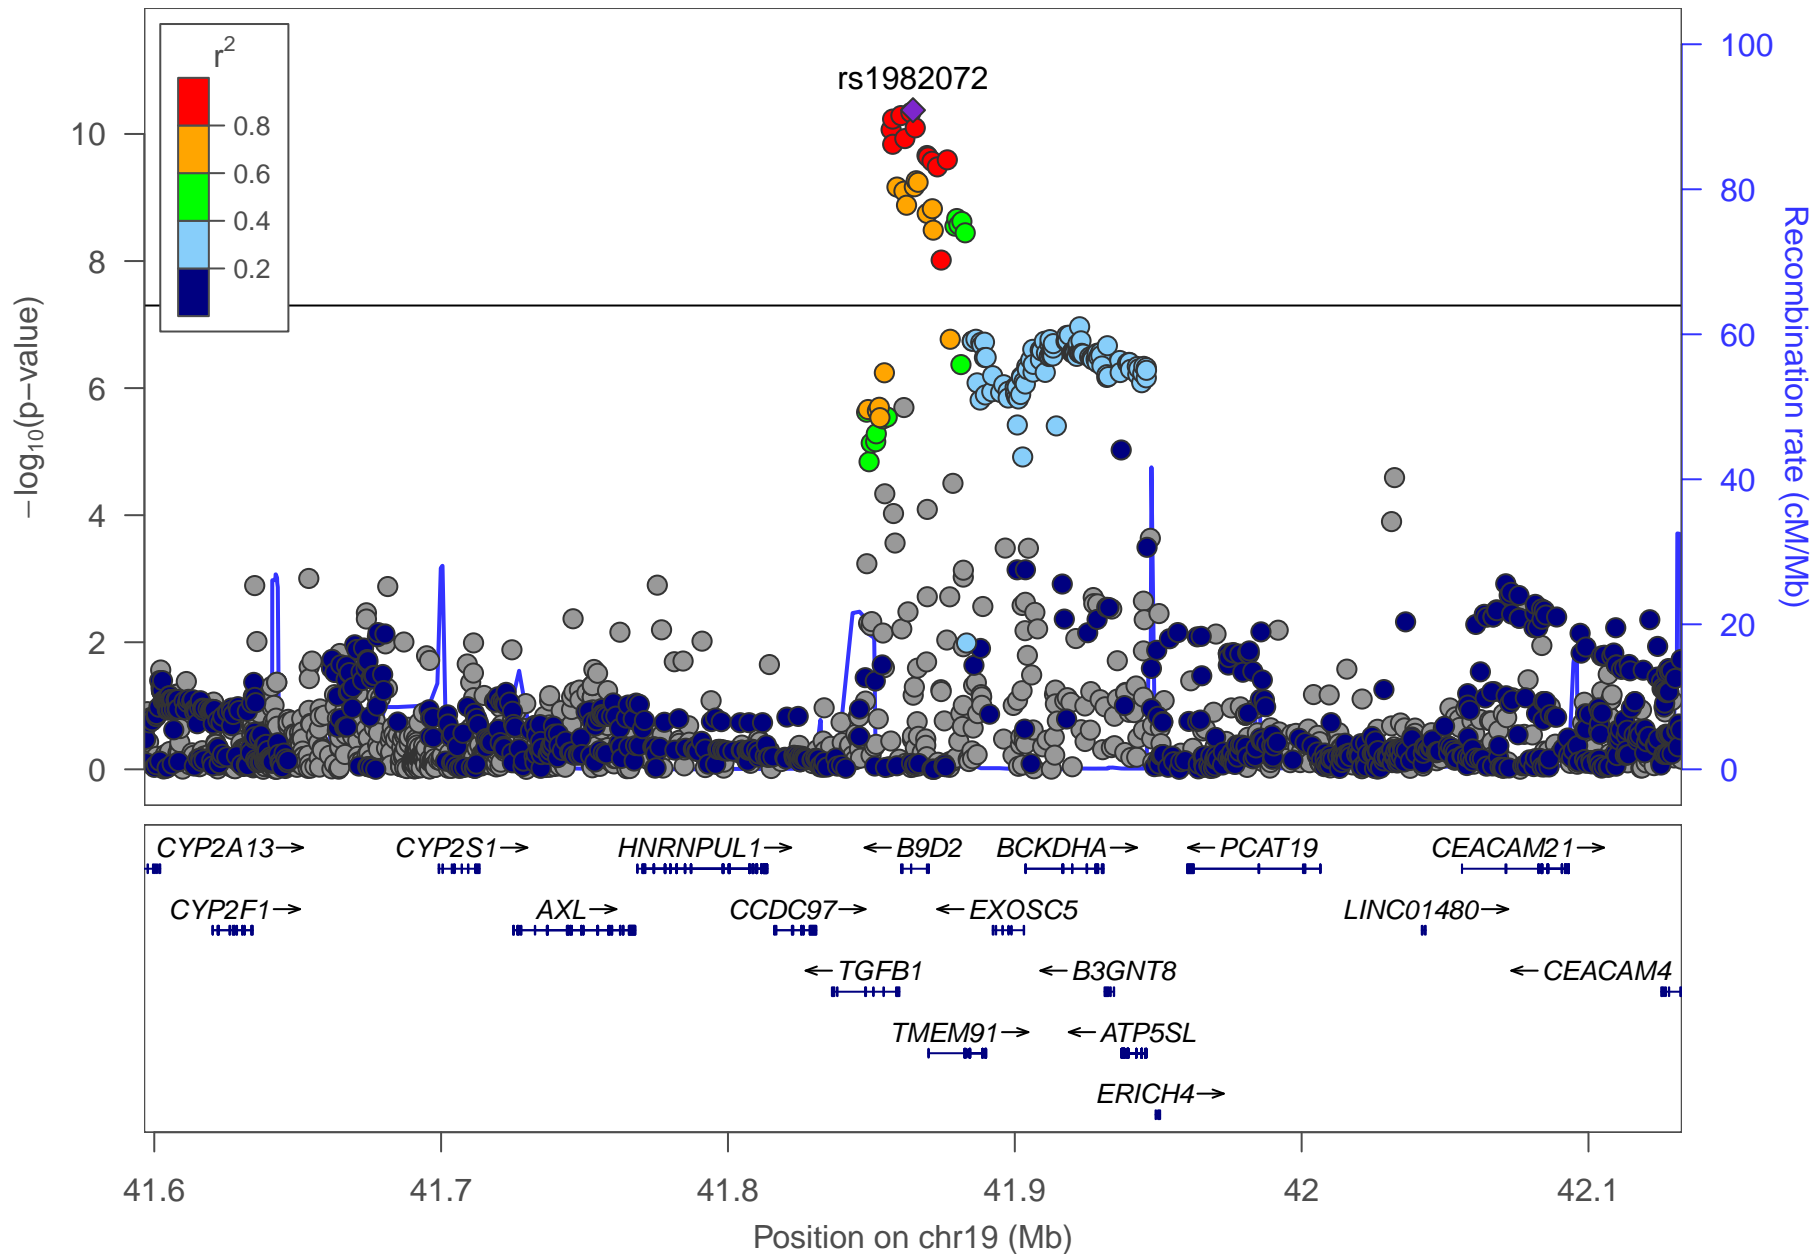

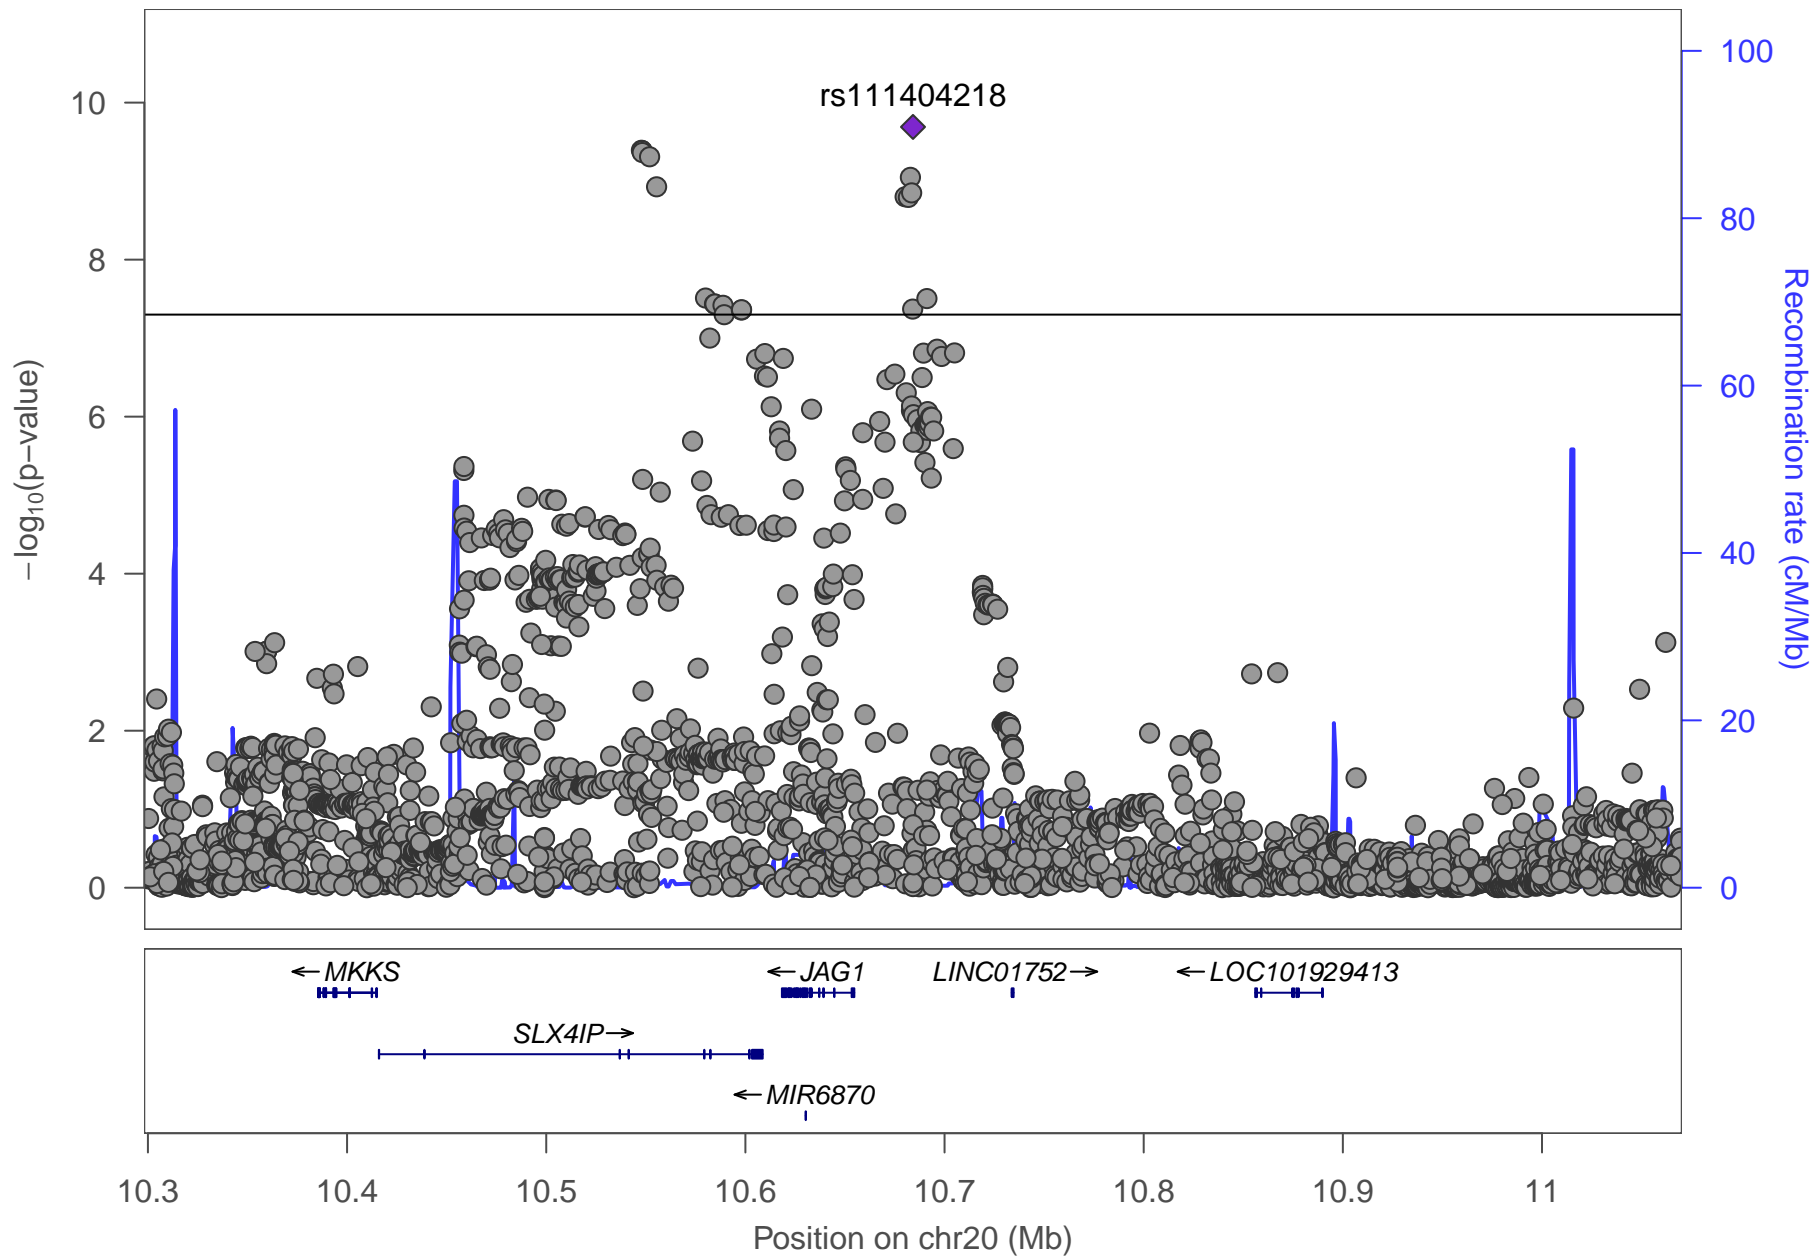

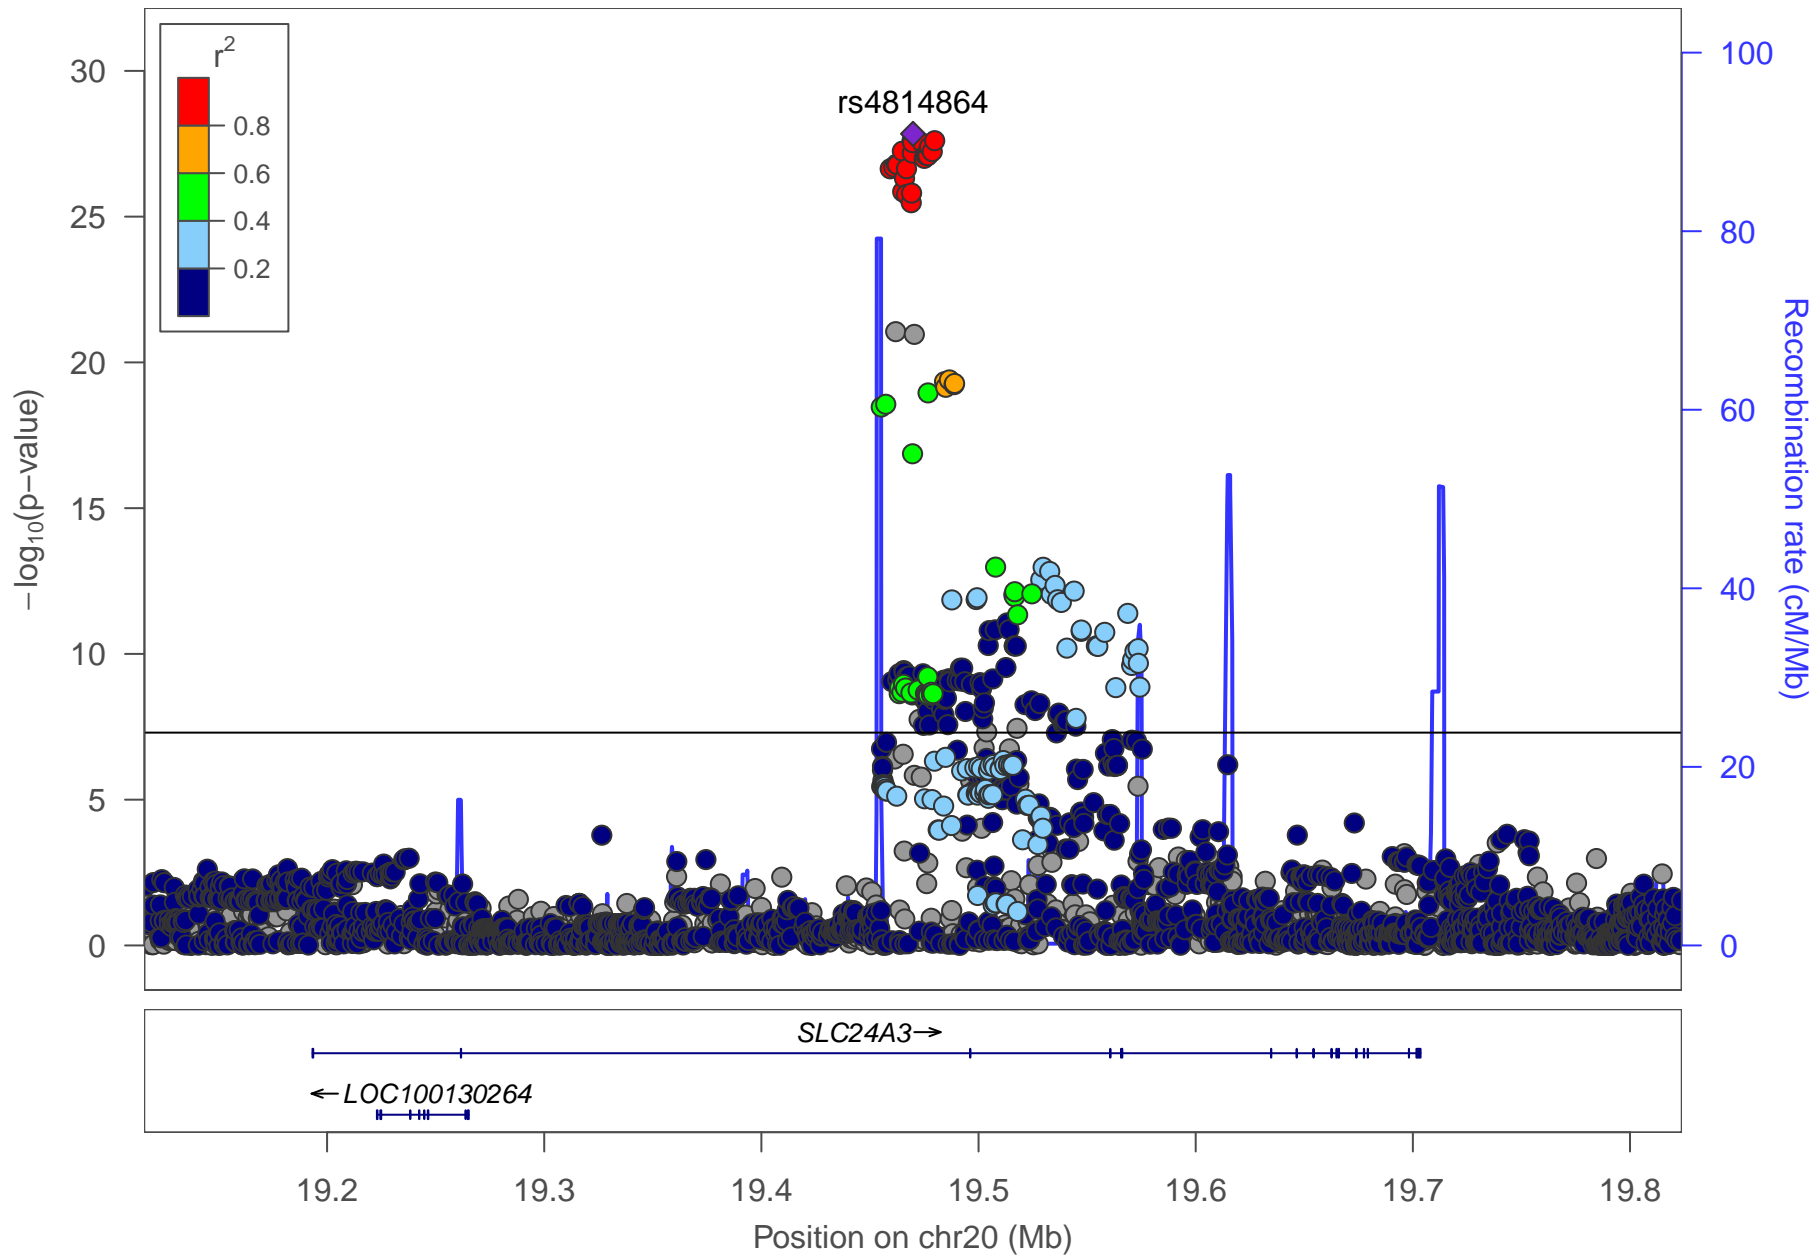

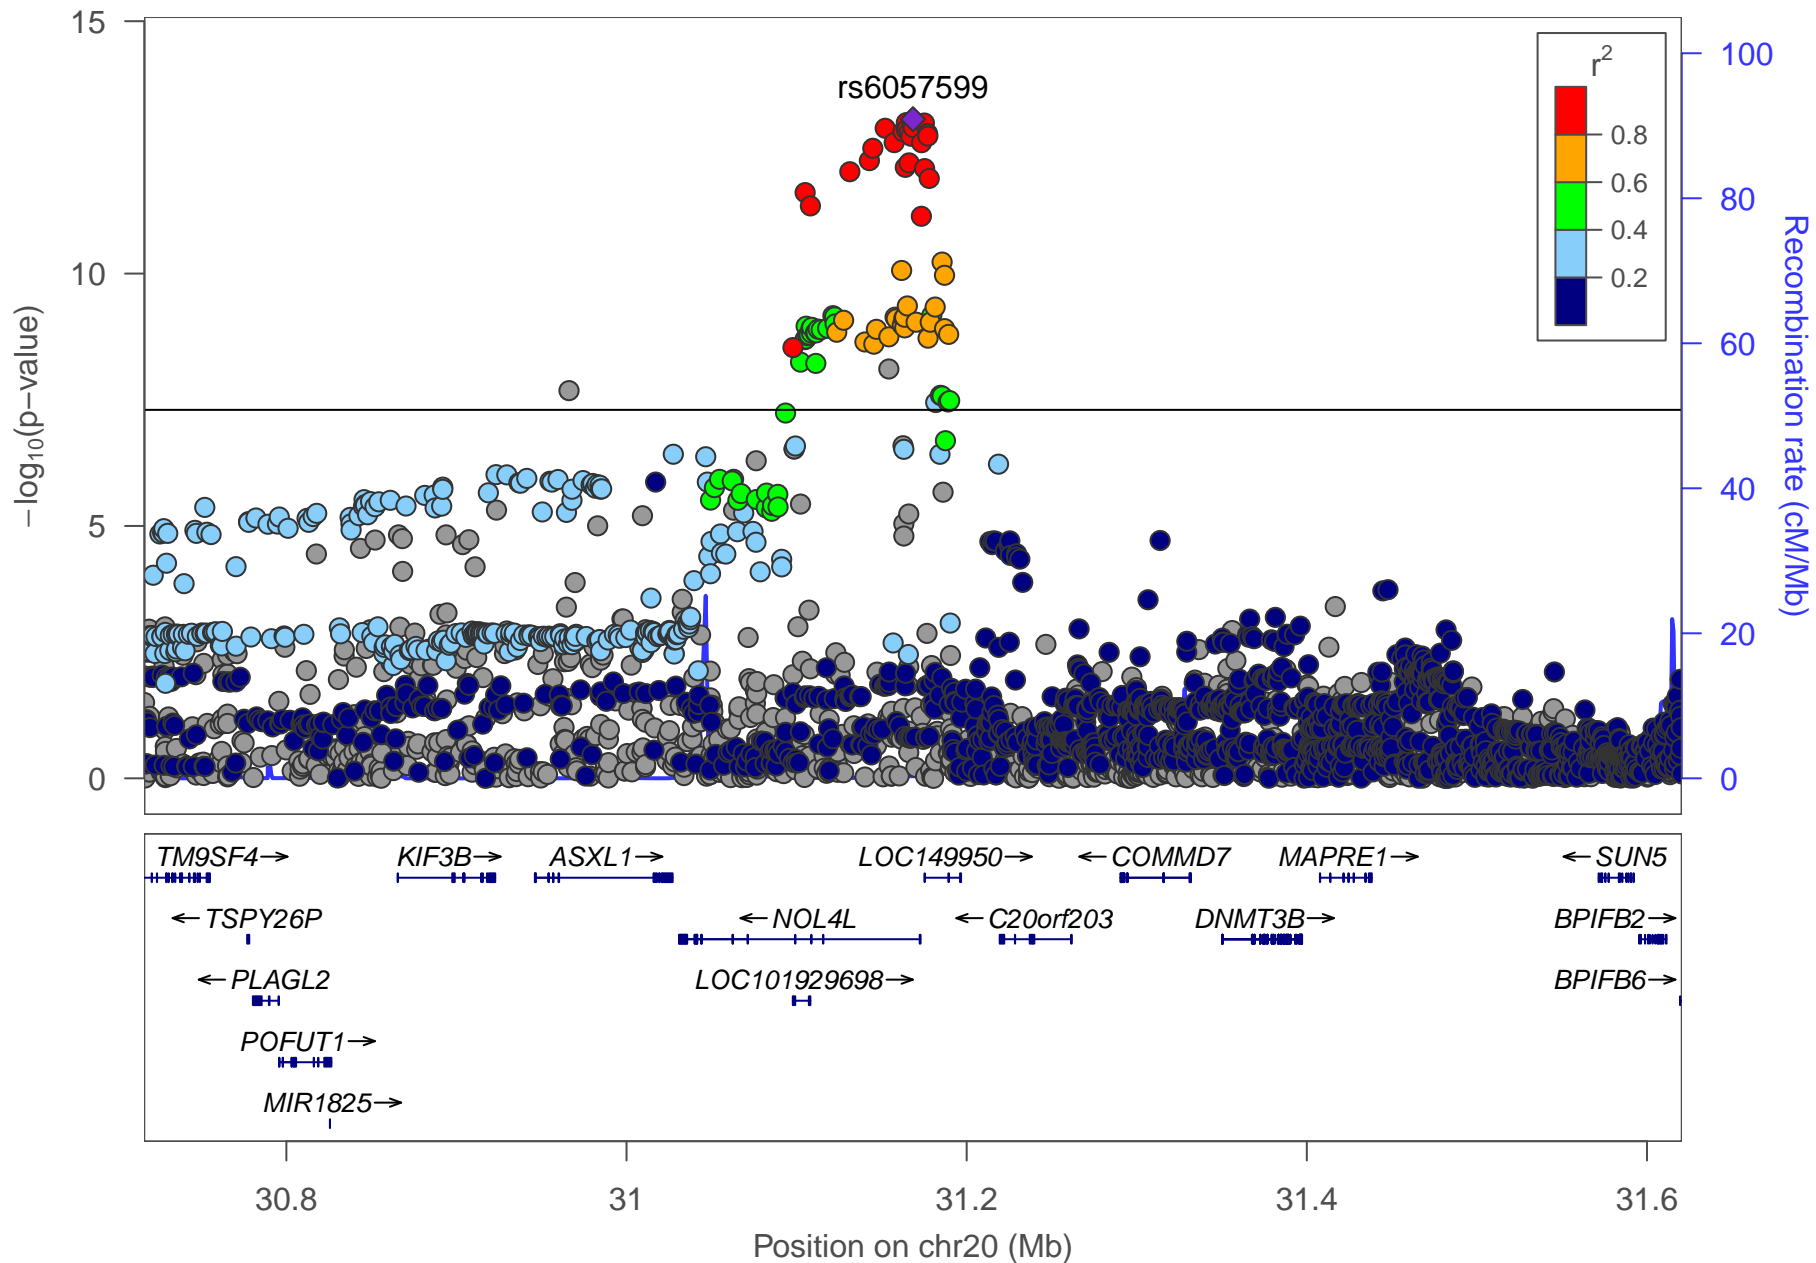

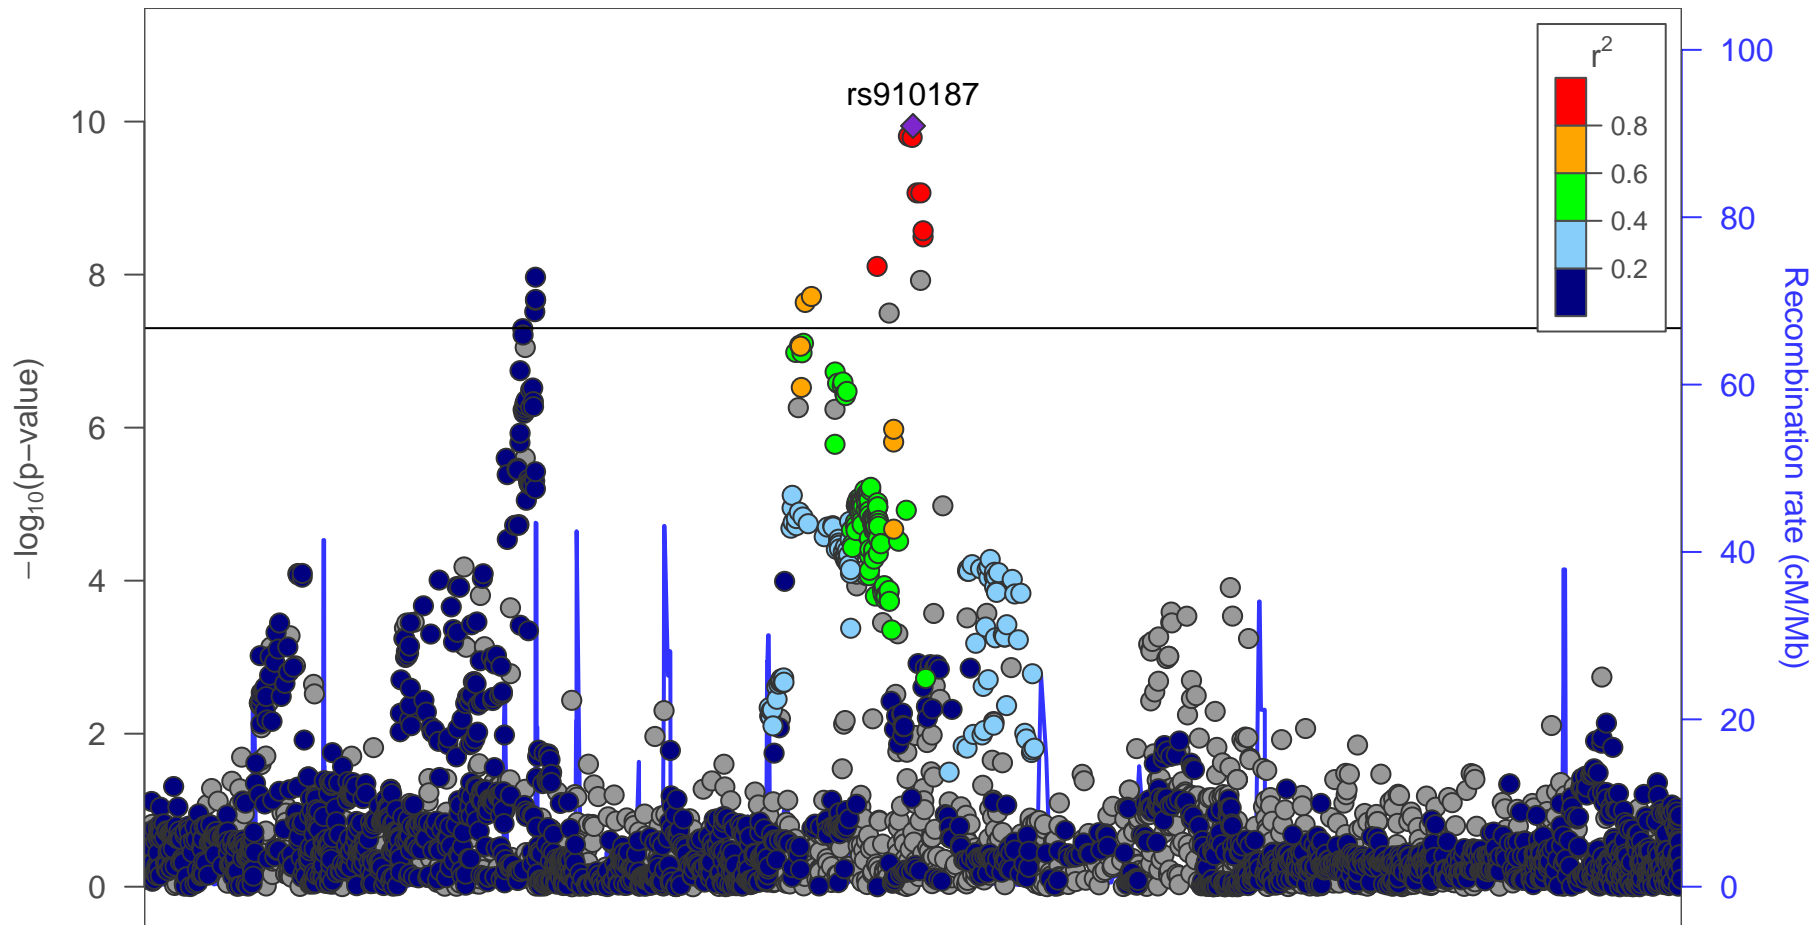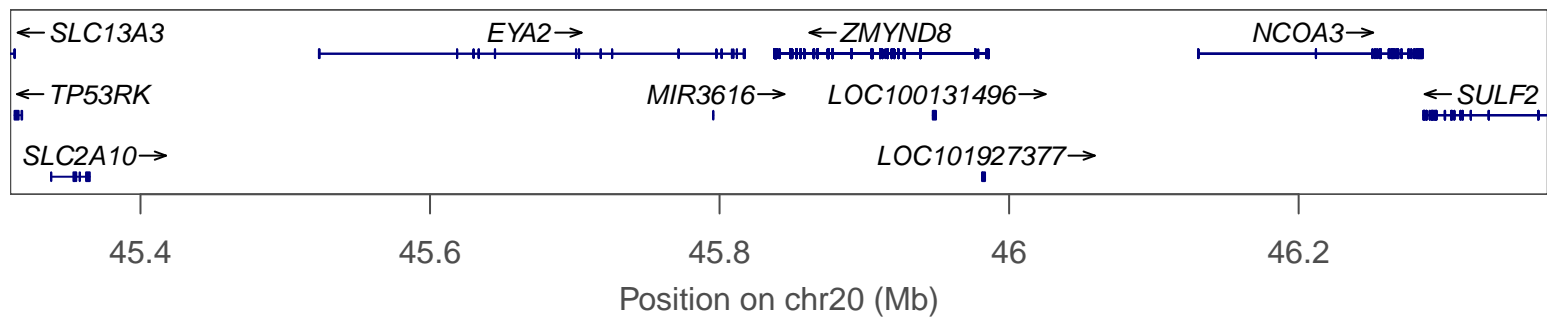

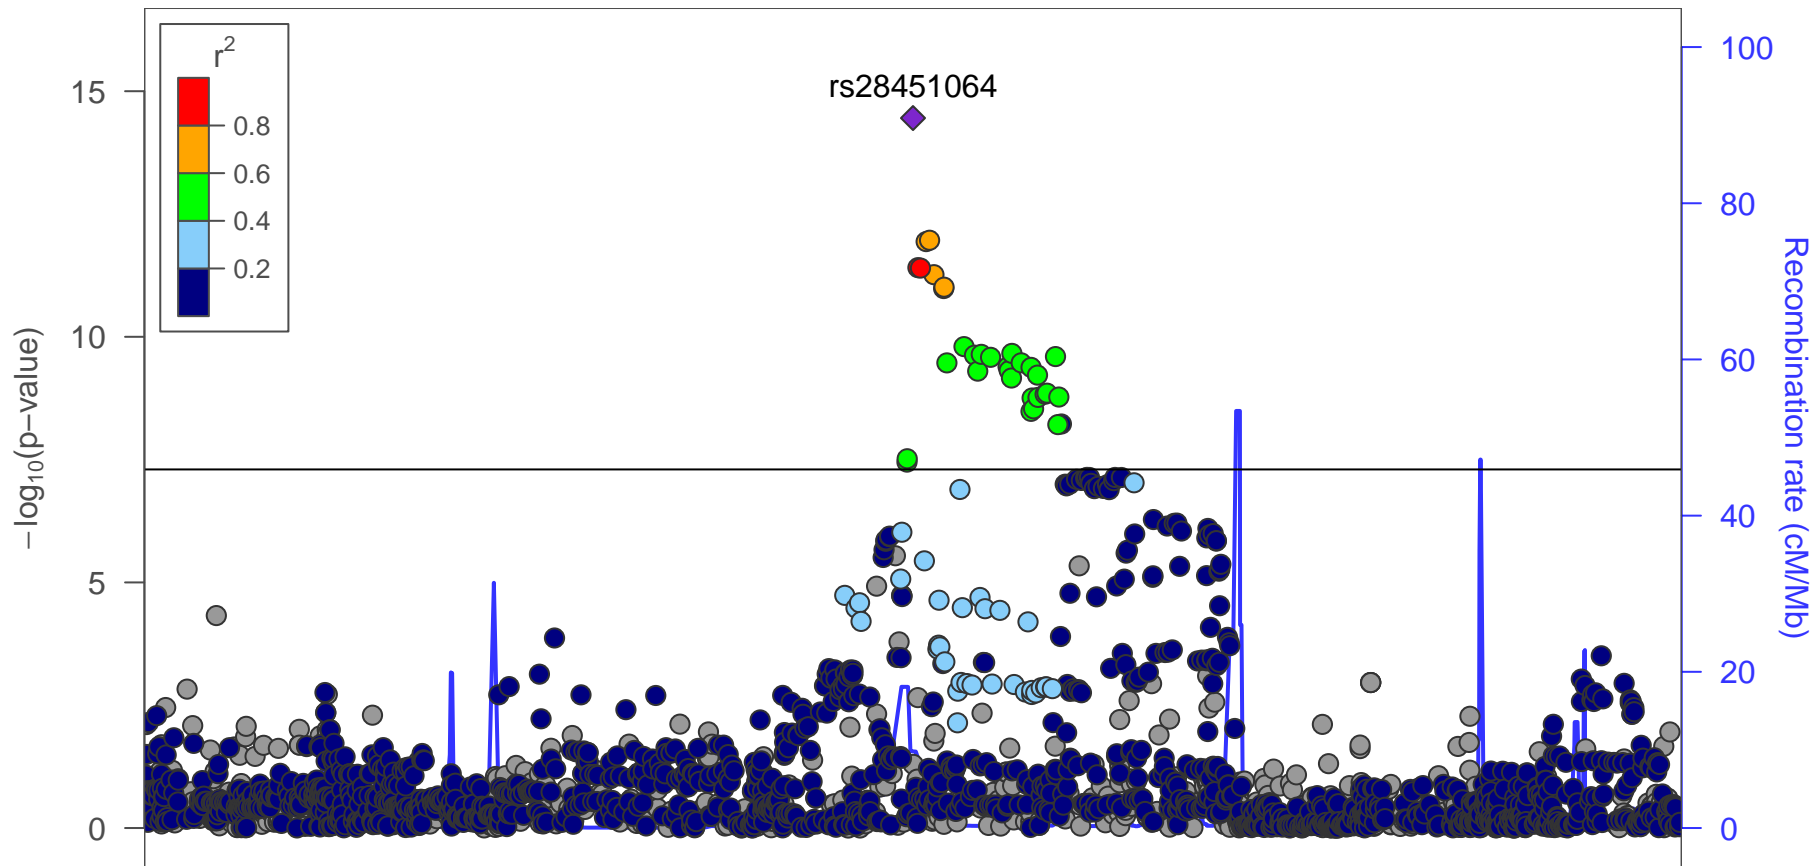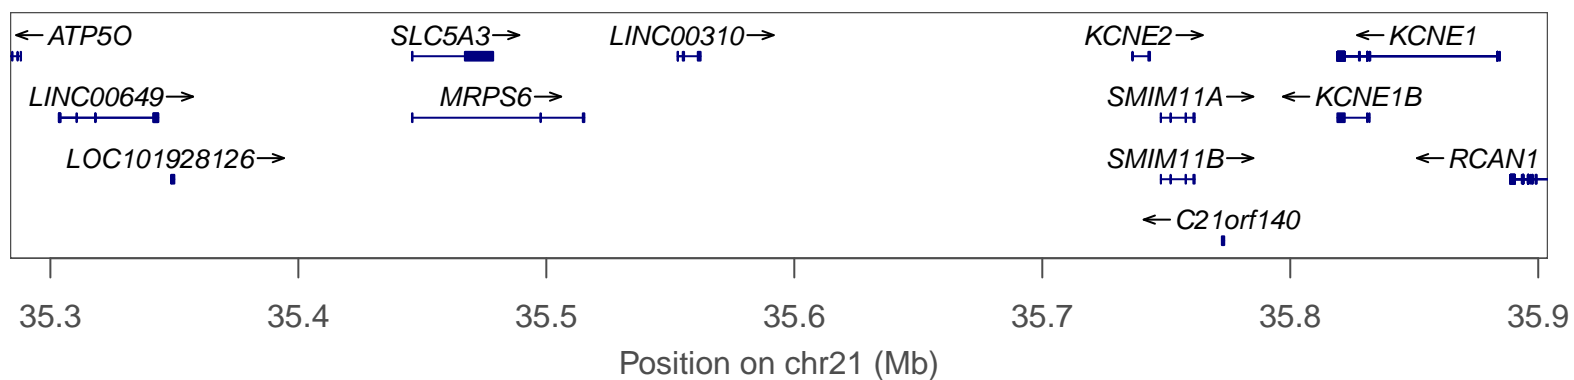

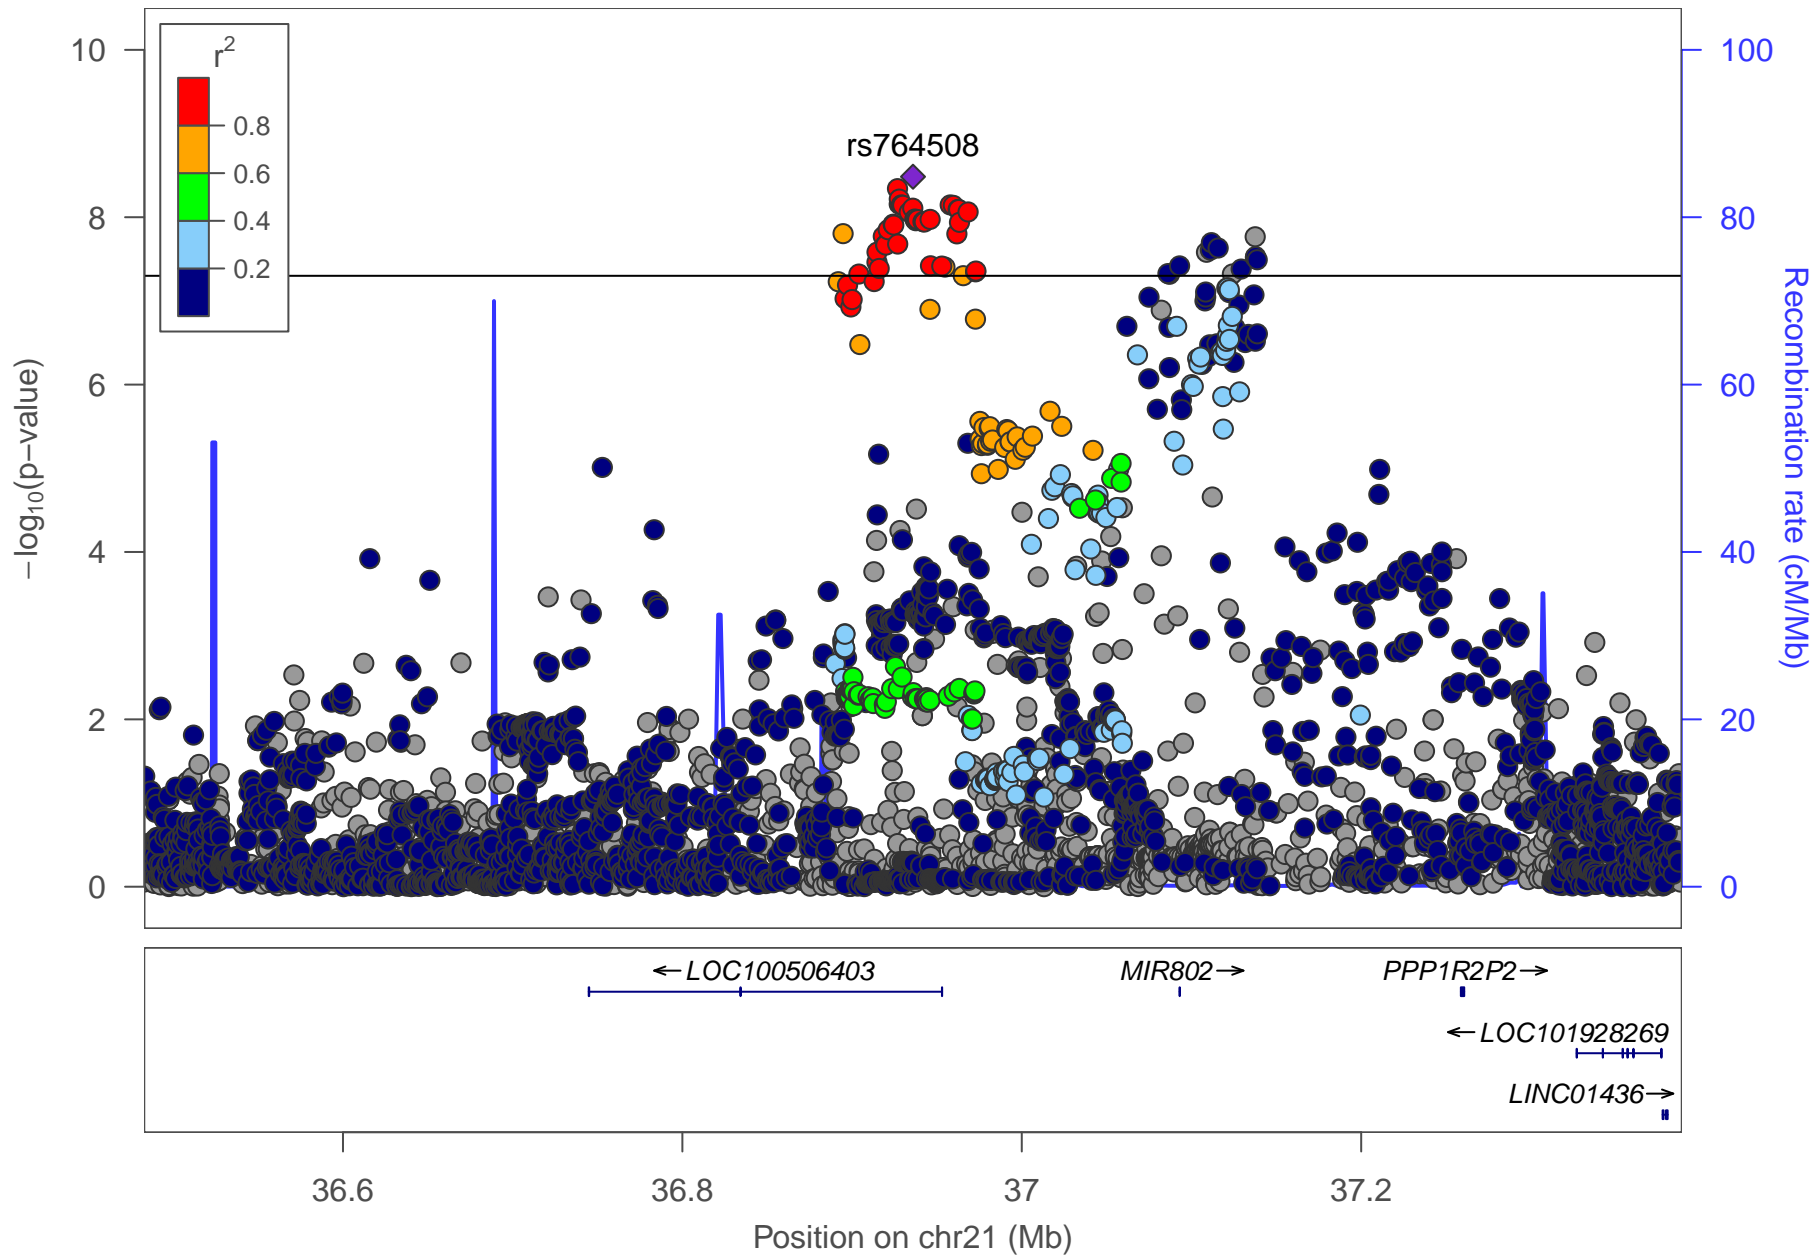



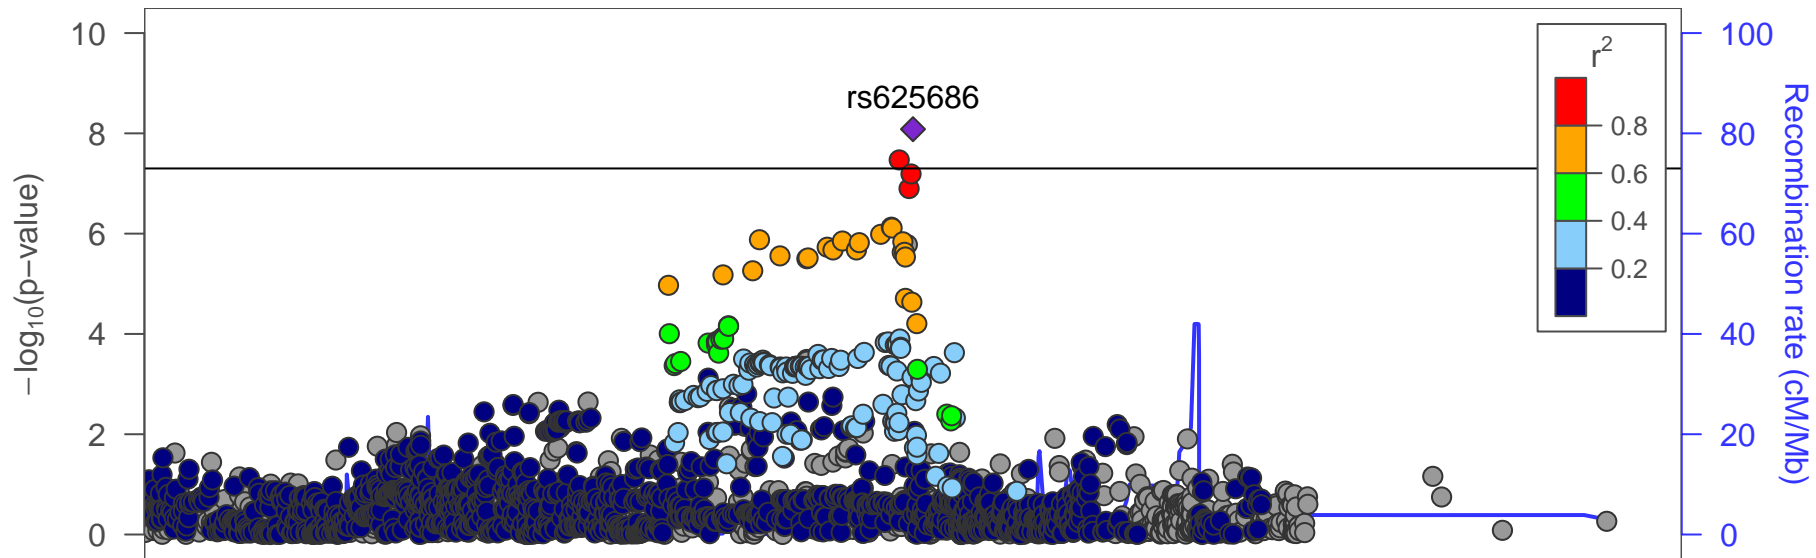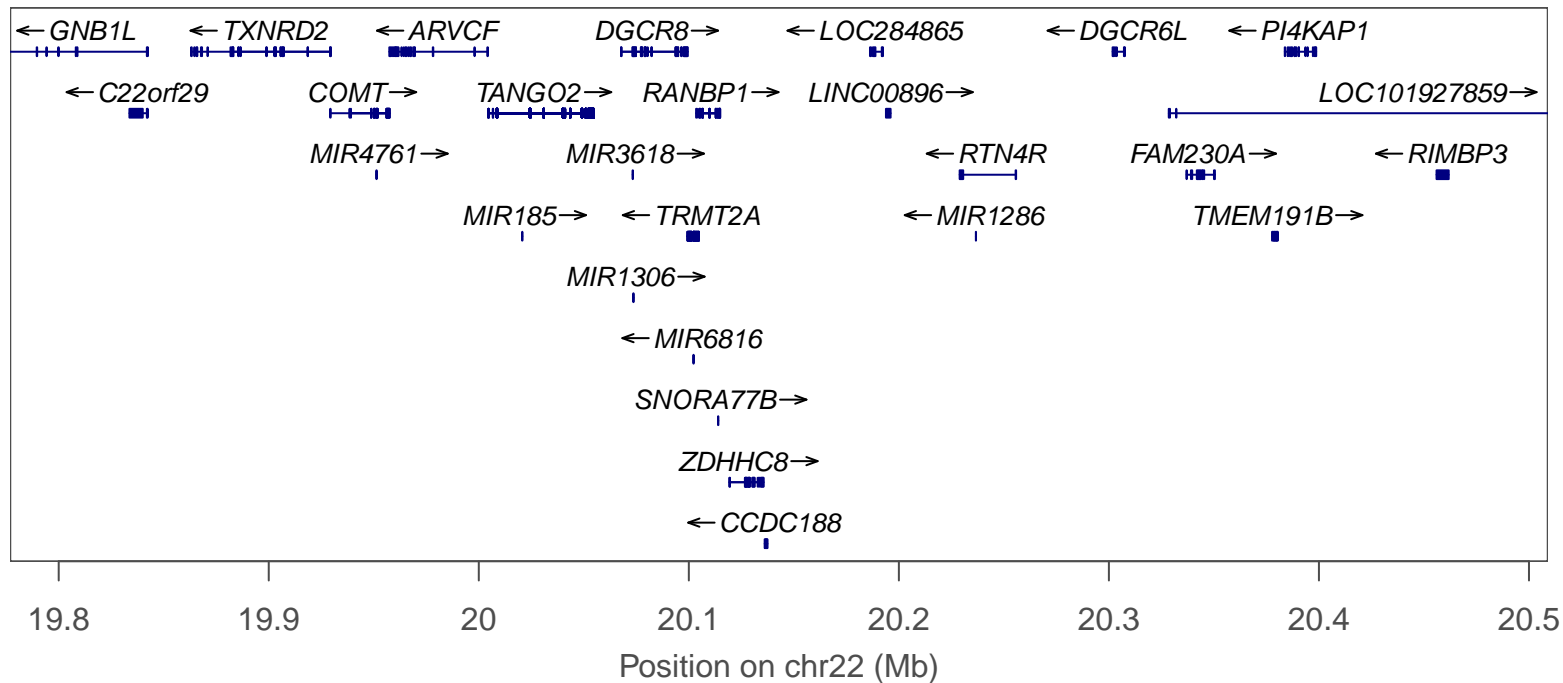

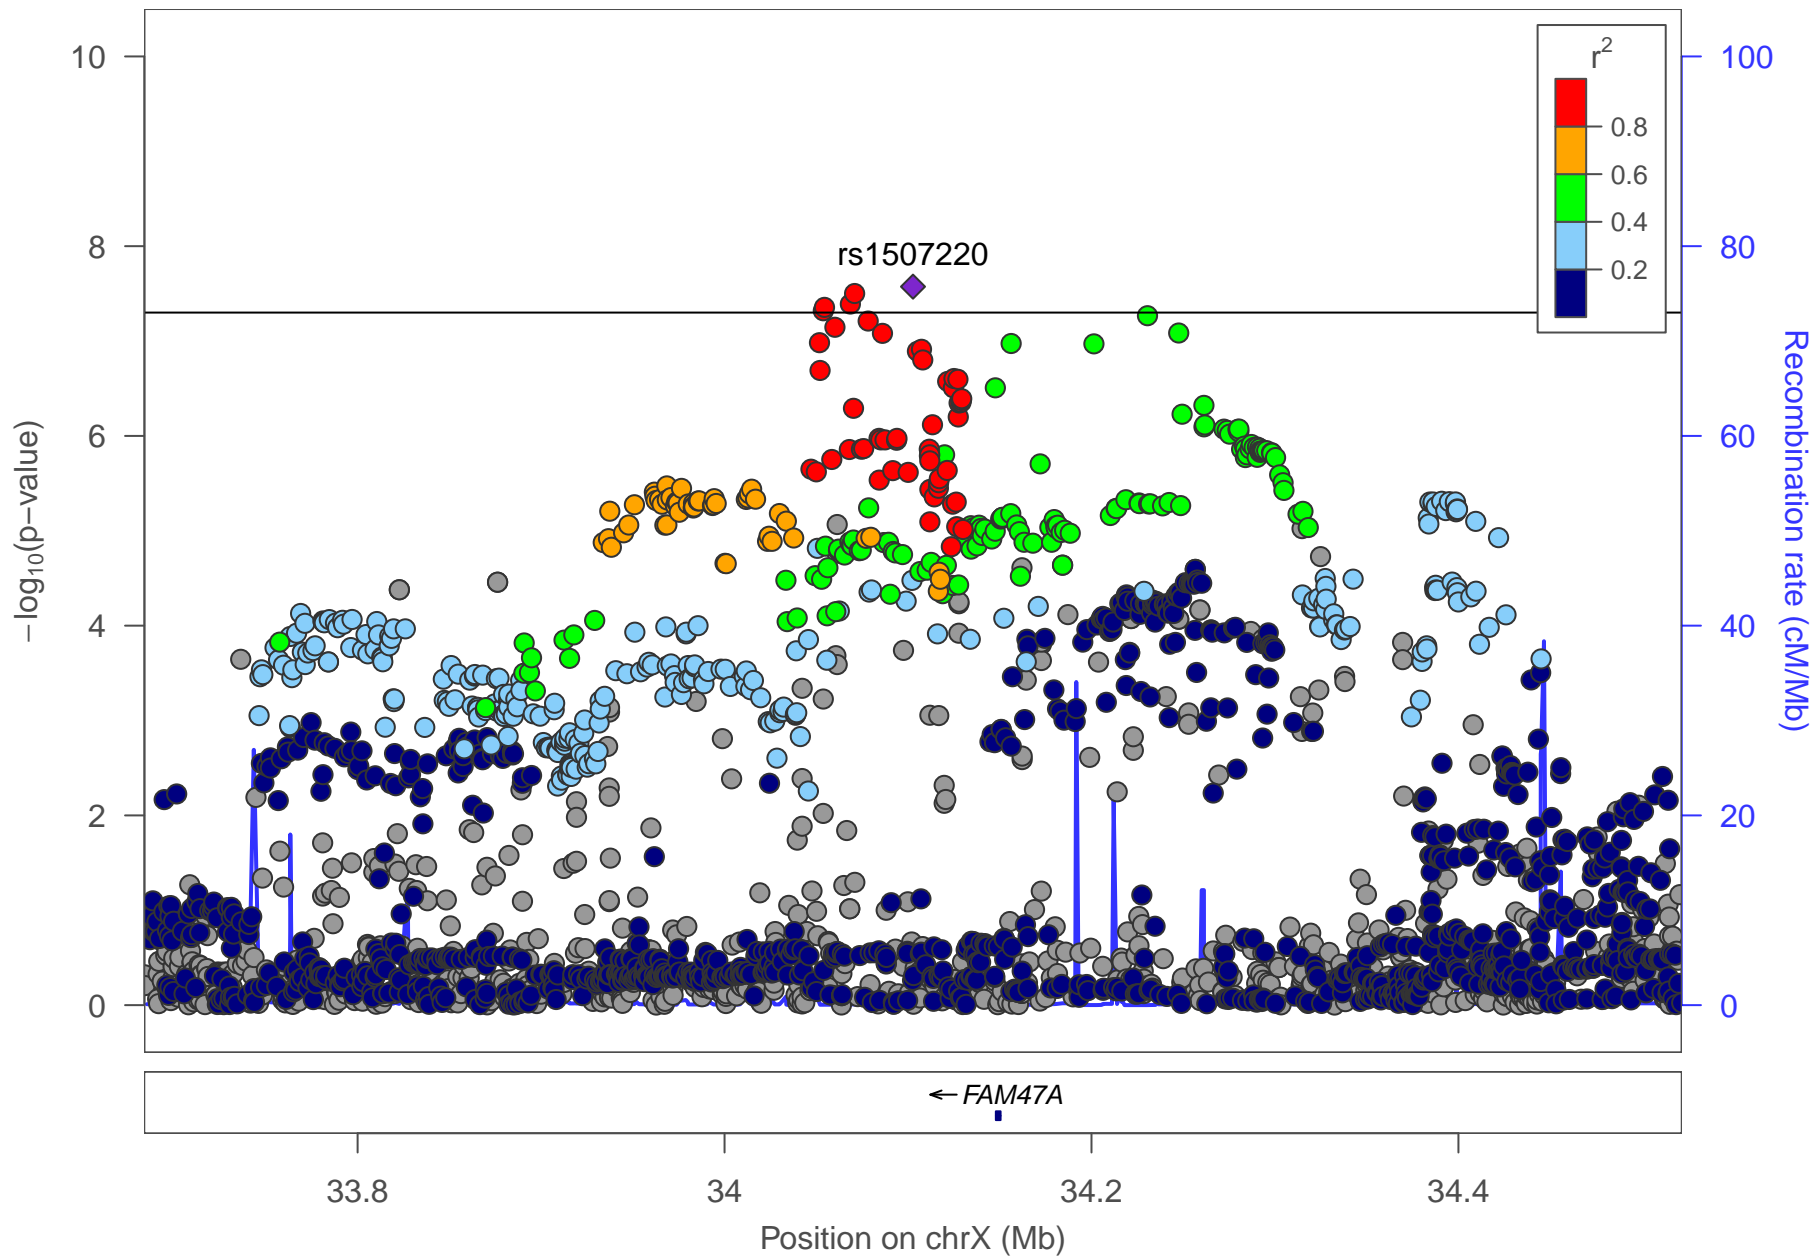

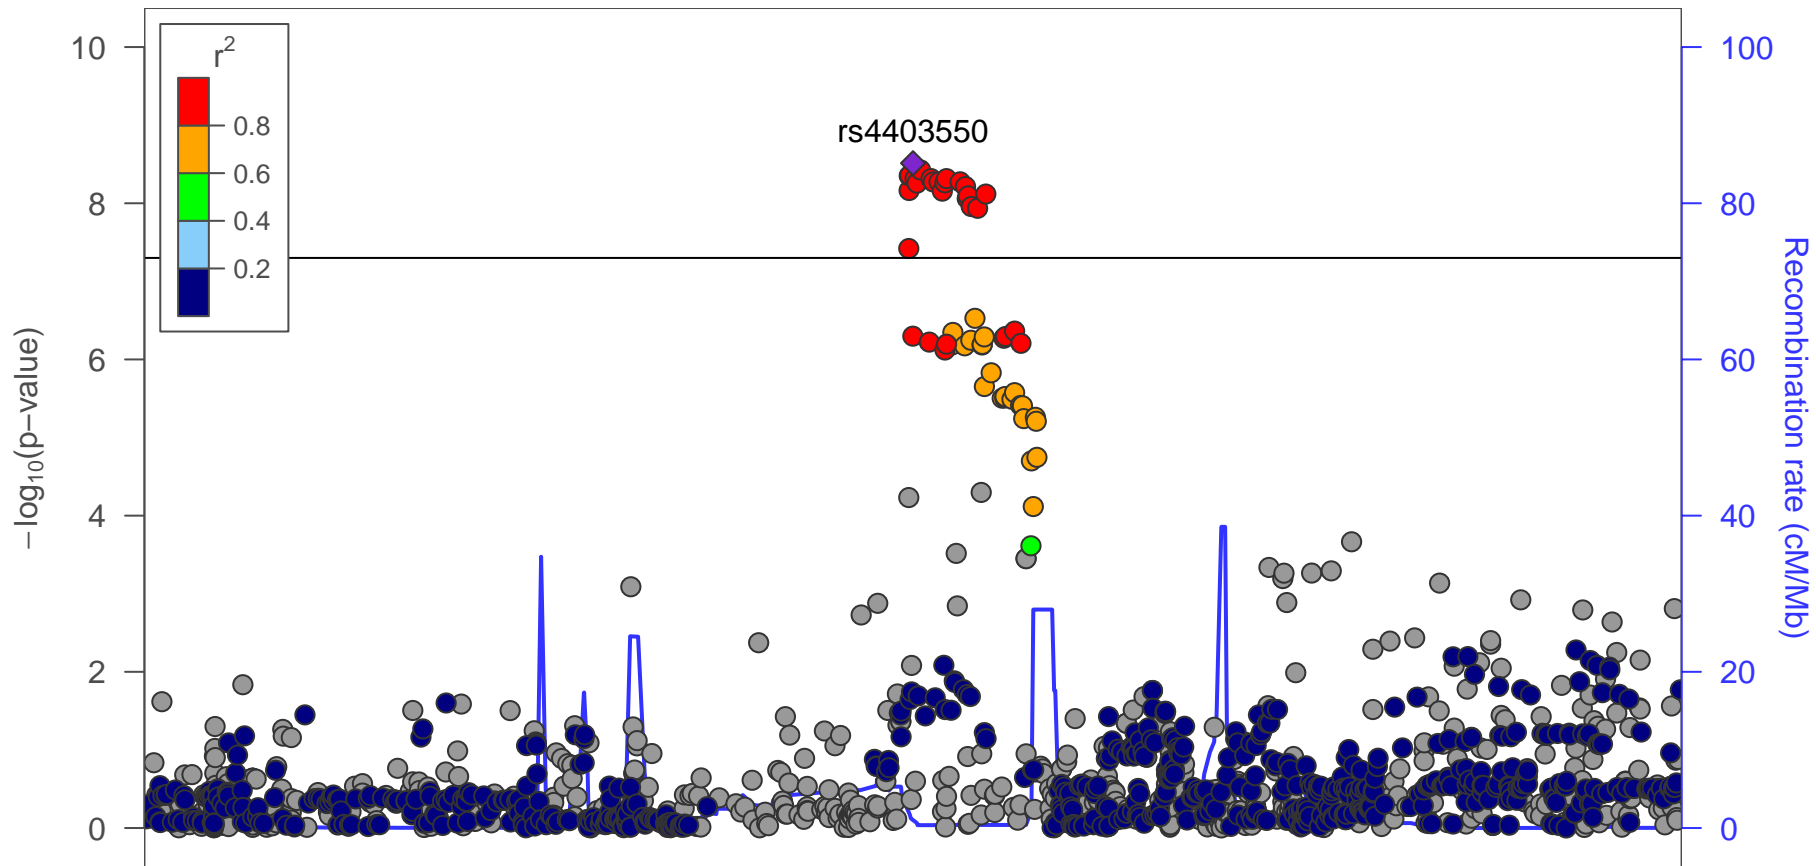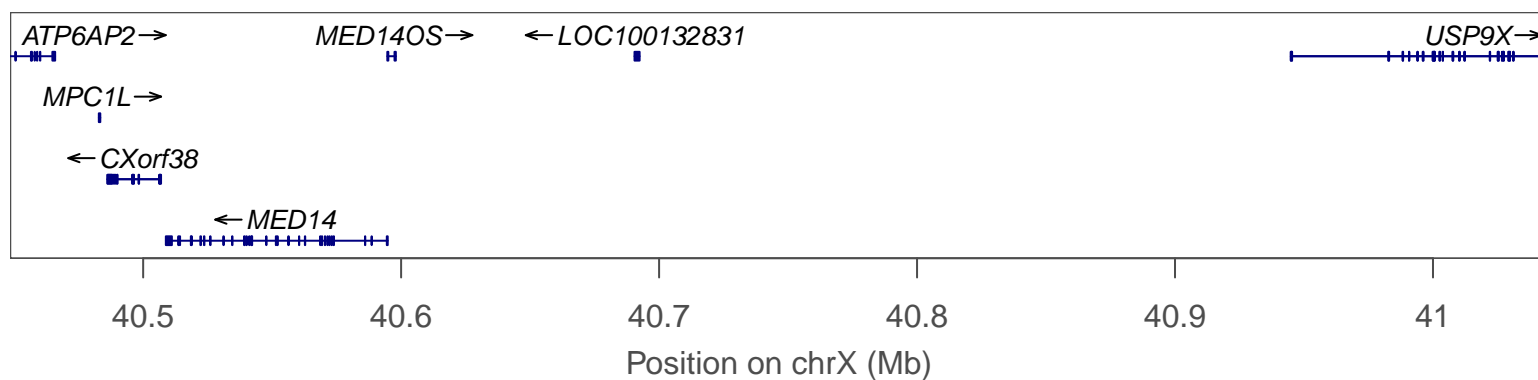

Supplement: Supplementary file [file media-4.pdf]
