# Supplementary material for: Genome-wide analysis of 102,084 migraine cases identifies 123 risk loci and subtype-specific risk alleles
Source: bioRxiv or medRxiv preprint supplement (doi:10.1101/2021.01.20.21249647), 2021-01-25

**Study**

**BETA**

**BETA**

**95%-CI**

**rs10218452 (G), P=3.97e-05**

IHGC2016 MA

deCODE MA

DBDS MA

UKBB MA

LUMINA MA

**Fixed effect model**

$I^2 = 0\%$

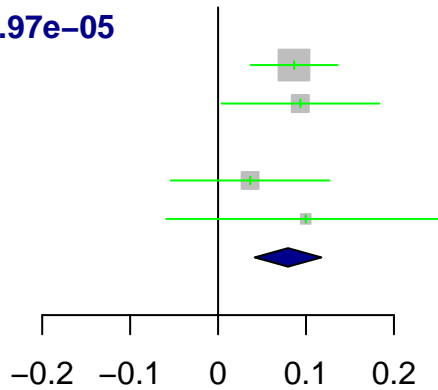

**Study**

**BETA**

**BETA**

**95%-CI**

**rs10128028 (T), P=0.010051**

IHGC2016 MA

deCODE MA

DBDS MA

UKBB MA

LUMINA MA

**Fixed effect model**

$I^2 = 0\%$

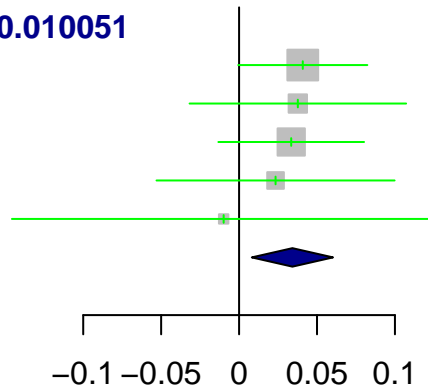

0.04 [0.00; 0.08]

0.04 [-0.03; 0.11]

0.03 [-0.01; 0.08]

0.02 [-0.05; 0.10]

-0.01 [-0.15; 0.13]

**0.03 [0.01; 0.06]**

**Study**

**BETA**

**BETA**

**95%-CI**

**rs12057629 (C), P=0.031506**

IHGC2016 MA

deCODE MA

DBDS MA

UKBB MA

LUMINA MA

**Fixed effect model**

$I^2 = 7\%$

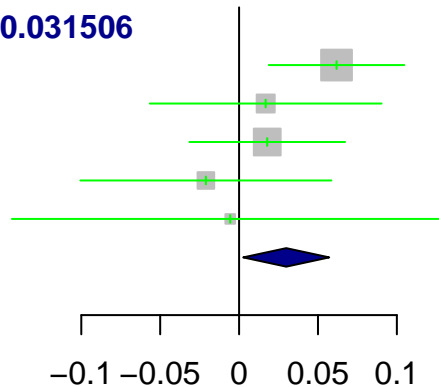

0.06 [0.02; 0.10]

0.02 [-0.06; 0.09]

0.02 [-0.03; 0.07]

-0.02 [-0.10; 0.06]

-0.01 [-0.14; 0.13]

**0.03 [0.00; 0.06]**

Study

BETA

BETA

95%-CI

**rs28739509 (C), P=0.056036**

IHGC2016 MA

deCODE MA

DBDS MA

UKBB MA

LUMINA MA

**Fixed effect model**

$I^2 = 0\%$

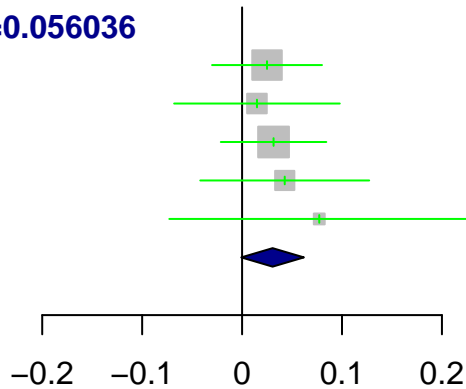

**Study**

**BETA**

**BETA**

**95%-CI**

**rs1472662 (T), P=0.014478**

IHGC2016 MA

deCODE MA

DBDS MA

UKBB MA

LUMINA MA

**Fixed effect model**

$I^2 = 0\%$

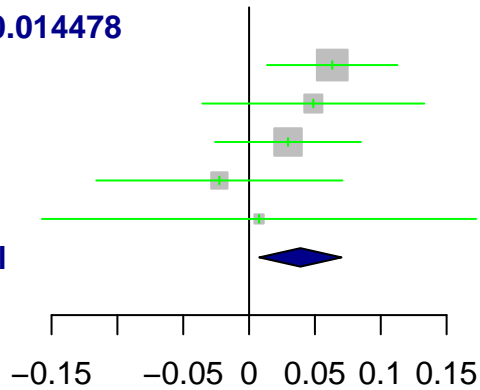

**Study**

**BETA**

**BETA**

**95%-CI**

**rs11578492 (C), P=0.231114**

IHGC2016 MA

deCODE MA

DBDS MA

UKBB MA

LUMINA MA

**Fixed effect model**

$I^2 = 0\%$

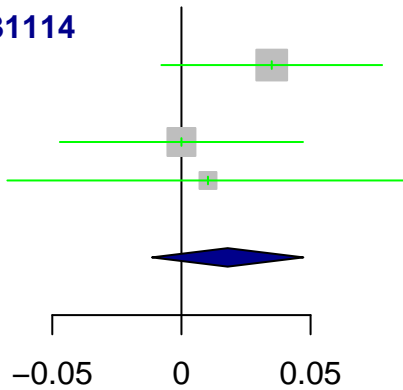

Study

BETA

BETA

95%-CI

**rs7511672 (G), P=0.305997**

IHGC2016 MA

deCODE MA

DBDS MA

UKBB MA

LUMINA MA

**Fixed effect model**

$I^2 = 0\%$

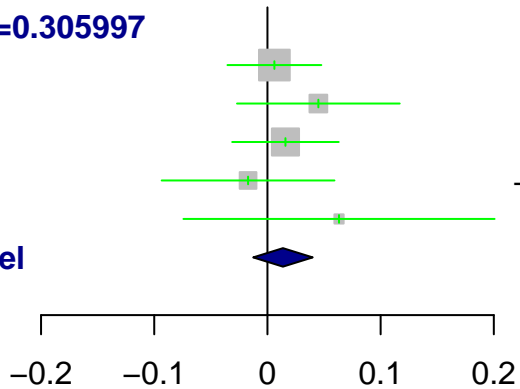

**Study**

**BETA**

**BETA**

**95%-CI**

**rs56019088 (I), P=0.817628**

IHGC2016 MA

deCODE MA

DBDS MA

UKBB MA

LUMINA MA

**Fixed effect model**

$I^2 = 0\%$

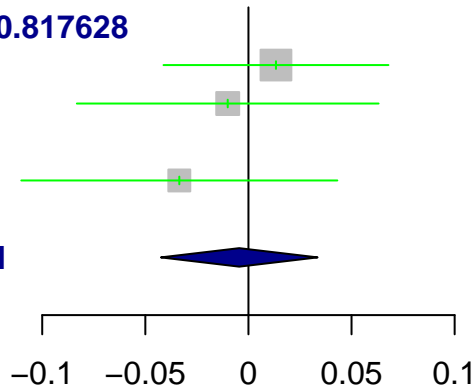



**Study**

**BETA**

**BETA**

**95%-CI**

**rs11165300 (G), P=0.042828**

IHGC2016 MA

deCODE MA

DBDS MA

UKBB MA

LUMINA MA

**Fixed effect model**

$I^2 = 0\%$

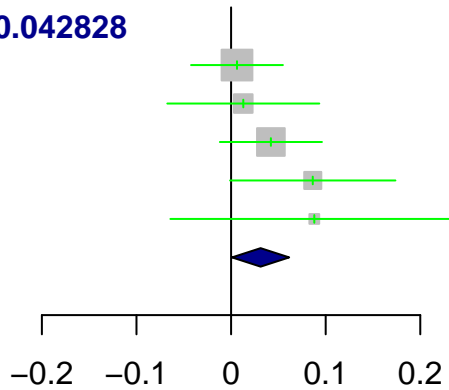

**Study**

**BETA**

**BETA**

**95%-CI**

**rs2078371 (C), P=0.011286**

IHGC2016 MA

deCODE MA

DBDS MA

UKBB MA

LUMINA MA

**Fixed effect model**

$I^2 = 45\%$

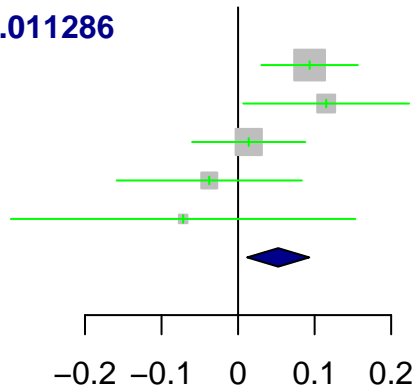

0.09 [0.03; 0.16]

0.12 [0.01; 0.22]

0.01 [-0.06; 0.09]

-0.04 [-0.16; 0.08]

-0.07 [-0.30; 0.15]

**0.05 [0.01; 0.09]**

Study

BETA

BETA

95%-CI

**rs6693567 (C), P=0.37565**

IHGC2016 MA

deCODE MA

DBDS MA

UKBB MA

LUMINA MA

**Fixed effect model**

$I^2 = 0\%$

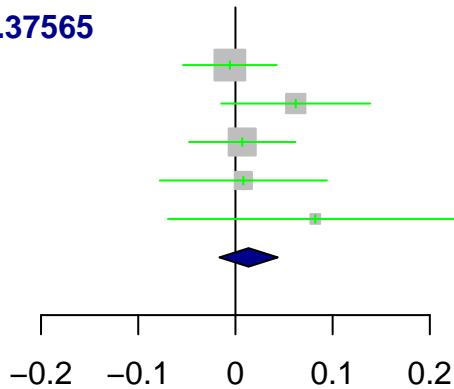

Study

BETA

BETA

95%-CI

**rs2274319 (T), P=0.000802**

IHGC2016 MA

deCODE MA

DBDS MA

UKBB MA

LUMINA MA

**Fixed effect model**

$I^2 = 0\%$

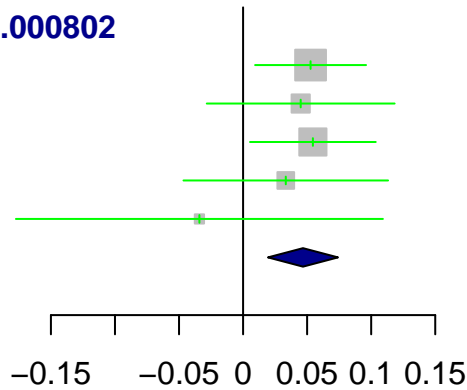

**Study**

**BETA**

**BETA**

**95%-CI**

**rs11487328 (G), P=0.013317**

IHGC2016 MA

deCODE MA

DBDS MA

UKBB MA

LUMINA MA

**Fixed effect model**

$I^2 = 0\%$

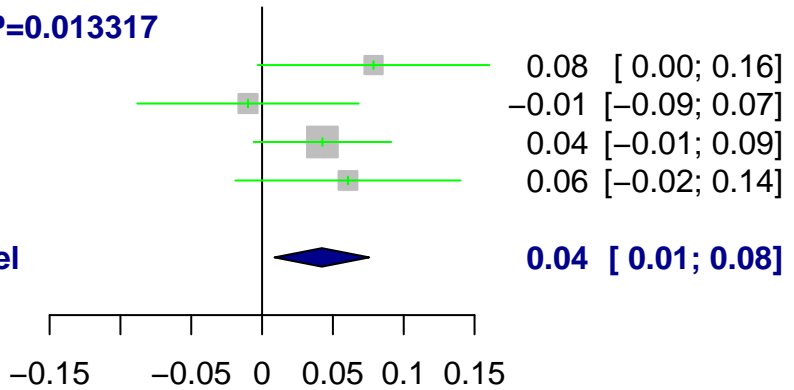

Study

BETA

BETA

95%-CI

**rs6668908 (G), P=0.293863**

IHGC2016 MA

deCODE MA

DBDS MA

UKBB MA

LUMINA MA

**Fixed effect model**

$I^2 = 14\%$

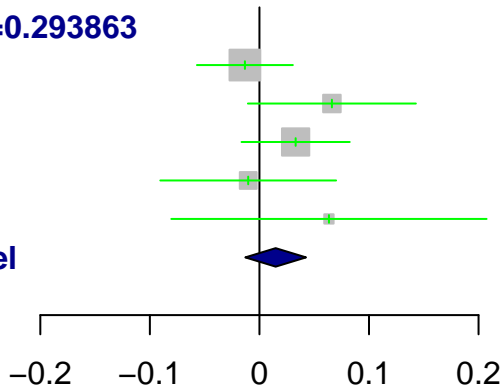

**Study**

**BETA**

**BETA**

**95%-CI**

**rs56140113 (C), P=0.003938**

IHGC2016 MA

deCODE MA

DBDS MA

UKBB MA

LUMINA MA

**Fixed effect model**

$I^2 = 0\%$

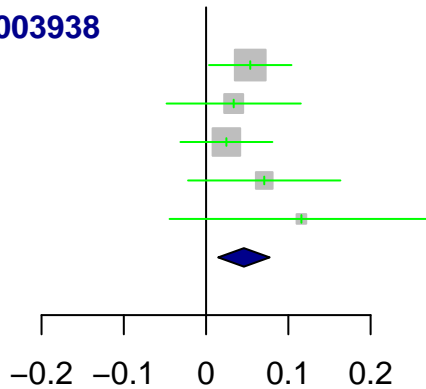

Study

BETA

BETA

95%-CI

**rs72764846 (G), P=0.374471**

IHGC2016 MA

deCODE MA

DBDS MA

UKBB MA

LUMINA MA

**Fixed effect model**

$I^2 = 0\%$

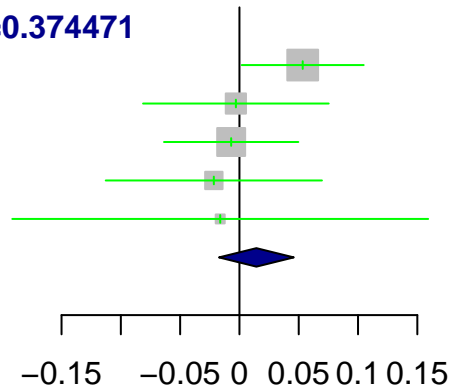

0.05 [0.00; 0.10]

-0.00 [-0.08; 0.08]

-0.01 [-0.06; 0.05]

-0.02 [-0.11; 0.07]

-0.02 [-0.19; 0.16]

**0.01 [-0.02; 0.05]**



Study

BETA

BETA

95%-CI

**rs12712881 (A), P=0.255549**

IHG2016 MA

deCODE MA

DBDS MA

UKBB MA

LUMINA MA

**Fixed effect model**

$I^2 = 0\%$

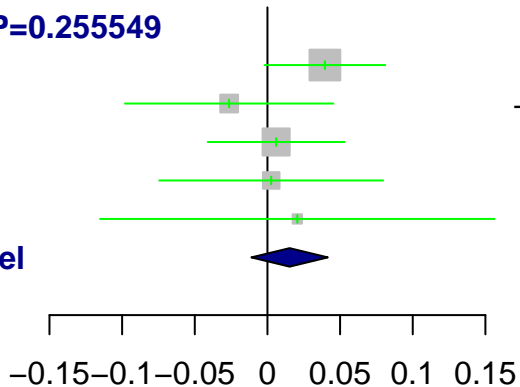

**Study**

**BETA**

**BETA**

**95%-CI**

**rs4907224 (A), P=0.002066**

IHGC2016 MA

deCODE MA

DBDS MA

UKBB MA

LUMINA MA

**Fixed effect model**

$I^2 = 0\%$

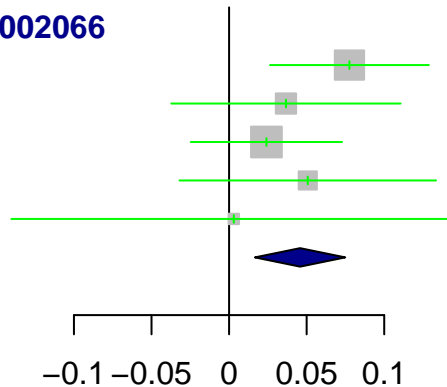

**Study**

**BETA**

**BETA**

**95%-CI**

**rs7564469 (C), P=0.00167**

IHGC2016 MA

deCODE MA

DBDS MA

UKBB MA

LUMINA MA

**Fixed effect model**

$I^2 = 59\%$

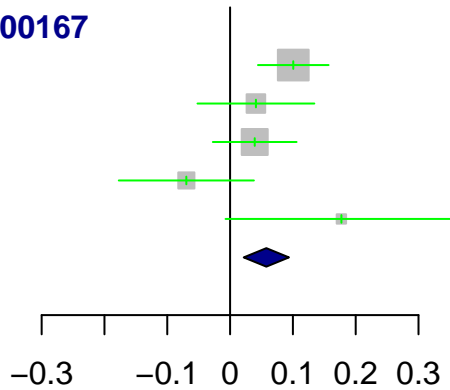

0.10 [0.04; 0.16]

0.04 [-0.05; 0.13]

0.04 [-0.03; 0.11]

-0.07 [-0.18; 0.04]

0.18 [-0.01; 0.36]

**0.06 [0.02; 0.09]**

Study

BETA

BETA

95%-CI

**rs895219 (C), P=0.007092**

IHGC2016 MA

deCODE MA

DBDS MA

UKBB MA

LUMINA MA

**Fixed effect model**

$I^2 = 0\%$

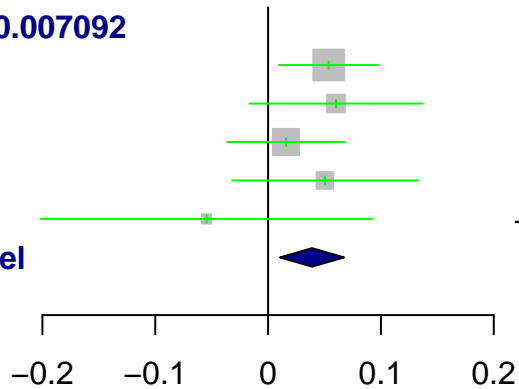

**Study**

**BETA**

**BETA**

**95%-CI**

**rs843215 (G), P=0.036867**

IHGC2016 MA

deCODE MA

DBDS MA

UKBB MA

LUMINA MA

**Fixed effect model**

$I^2 = 71\%$

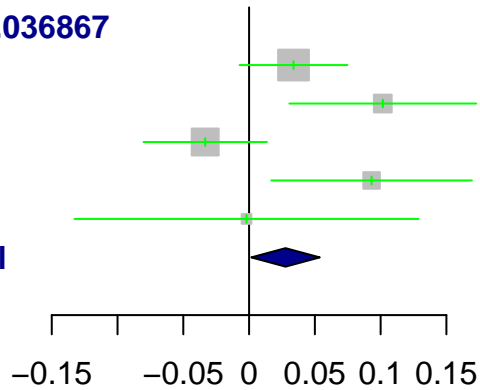

Study

BETA

BETA

95%-CI

**rs4668251 (G), P=0.426211**

IHGC2016 MA

deCODE MA

DBDS MA

UKBB MA

LUMINA MA

**Fixed effect model**

$I^2 = 0\%$

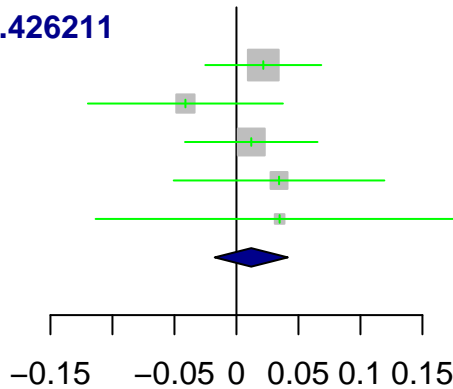

Study

BETA

BETA

95%-CI

**rs72923449 (C), P=0.064591**

IHGC2016 MA

0.15 [ 0.03; 0.26]

deCODE MA

-0.04 [-0.26; 0.19]

DBDS MA

UKBB MA

0.13 [-0.05; 0.32]

LUMINA MA

-0.66 [-1.08; -0.24]

**Fixed effect model**

**0.08 [ 0.00; 0.17]**

$I^2 = 79\%$

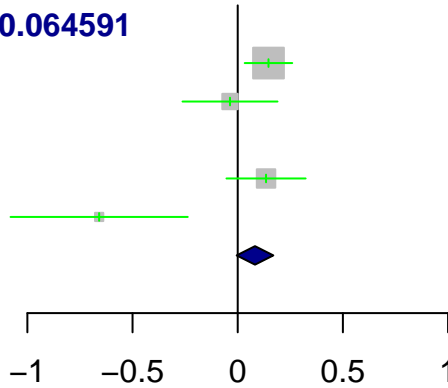

**Study**

**BETA**

**BETA**

**95%-CI**

**rs138556413 (C), P=0.013752**

IHGC2016 MA

deCODE MA

DBDS MA

UKBB MA

LUMINA MA

**Fixed effect model**

$I^2 = 65\%$

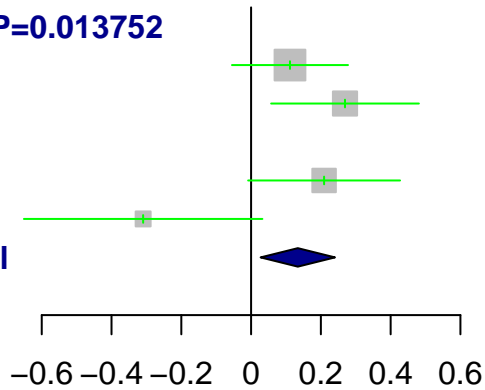



**Study**

**BETA**

**BETA**

**95%-CI**

**rs10166942 (T), P=3.34e-07**

IHGC2016 MA

deCODE MA

DBDS MA

UKBB MA

LUMINA MA

**Fixed effect model**

$I^2 = 46\%$

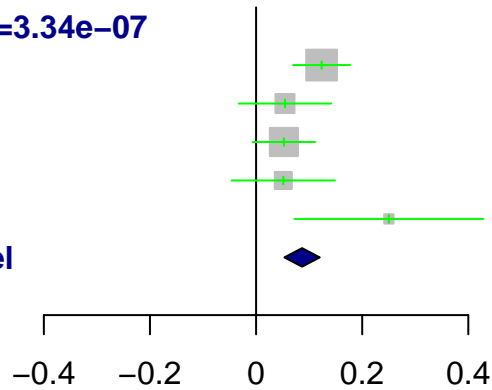

**Study**

**BETA**

**BETA**

**95%-CI**

**rs7371912 (A), P=1.56e-05**

IHGC2016 MA

deCODE MA

DBDS MA

UKBB MA

LUMINA MA

**Fixed effect model**

$I^2 = 32\%$

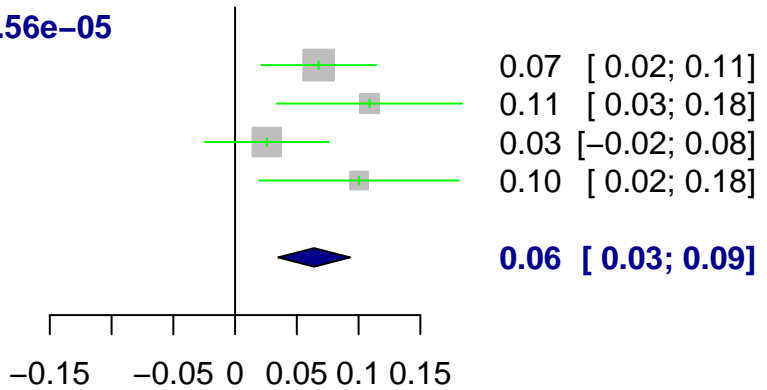

**Study**

**BETA**

**BETA**

**95%-CI**

**rs7618883 (T), P=0.035651**

IHGC2016 MA

deCODE MA

DBDS MA

UKBB MA

LUMINA MA

**Fixed effect model**

$I^2 = 0\%$

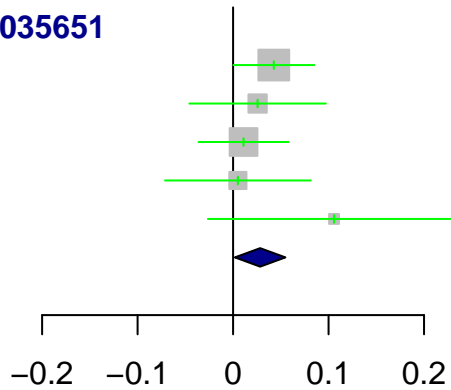

Study

BETA

BETA

95%-CI

**rs950570 (T), P=4.77e-05**

IHGC2016 MA

deCODE MA

DBDS MA

UKBB MA

LUMINA MA

**Fixed effect model**

$I^2 = 0\%$

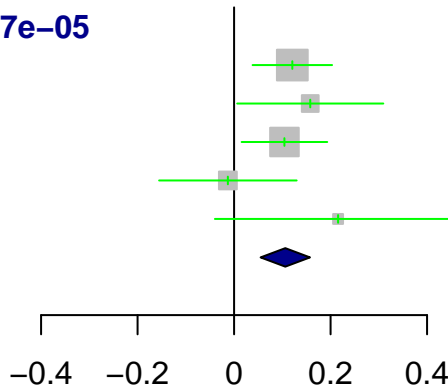

Study

BETA

BETA

95%-CI

**rs73138150 (T), P=0.48078**

IHGC2016 MA

deCODE MA

DBDS MA

UKBB MA

LUMINA MA

**Fixed effect model**

$I^2 = 8\%$

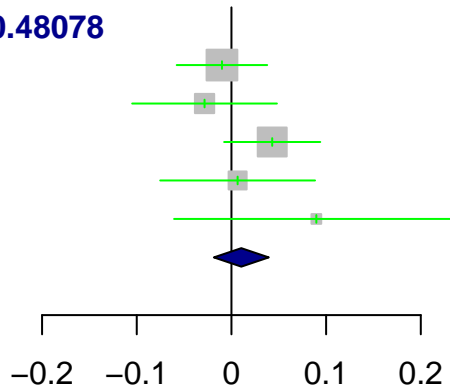

**Study**

**BETA**

**BETA**

**95%-CI**

**rs6795209 (A), P=0.061285**

IHGC2016 MA

deCODE MA

DBDS MA

UKBB MA

LUMINA MA

**Fixed effect model**

$I^2 = 40\%$

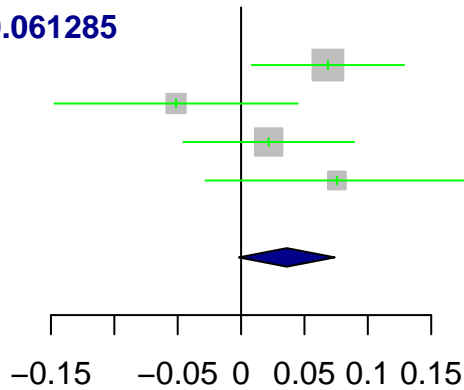

**Study**

**BETA**

**BETA**

**95%-CI**

**rs1499963 (C), P=0.020678**

IHGC2016 MA

deCODE MA

DBDS MA

UKBB MA

LUMINA MA

**Fixed effect model**

$I^2 = 0\%$

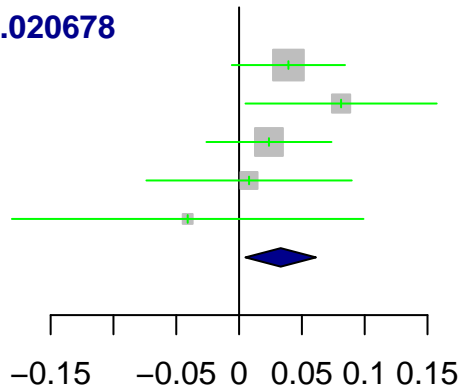

**Study**

**BETA**

**BETA**

**95%-CI**

**rs13078967 (A), P=0.023652**

IHGC2016 MA

deCODE MA

DBDS MA

UKBB MA

LUMINA MA

**Fixed effect model**

$I^2 = 0\%$

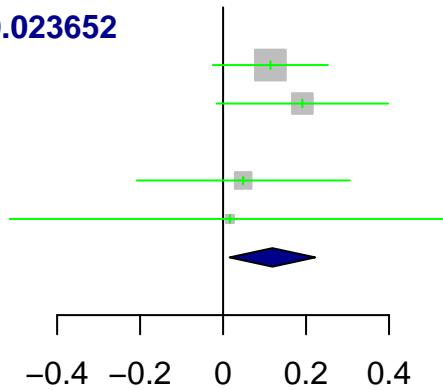

0.11 [-0.02; 0.25]

0.19 [-0.02; 0.40]

0.05 [-0.21; 0.31]

0.02 [-0.51; 0.55]

**0.12 [ 0.02; 0.22]**

-0.4 -0.2 0 0.2 0.4



Study

BETA

BETA

95%-CI

**rs73805934 (G), P=0.00375**

IHGC2016 MA

deCODE MA

DBDS MA

UKBB MA

LUMINA MA

**Fixed effect model**

$I^2 = 0\%$

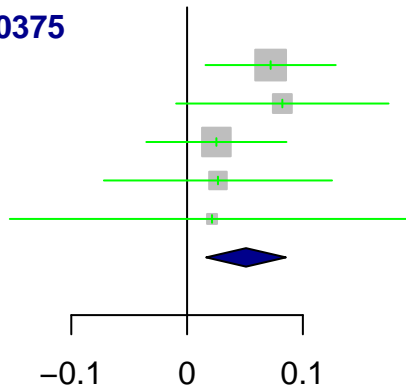

**Study**

**BETA**

**BETA**

**95%-CI**

**rs7684253 (T), P=0.585441**

IHGC2016 MA

deCODE MA

DBDS MA

UKBB MA

LUMINA MA

**Fixed effect model**

$I^2 = 0\%$

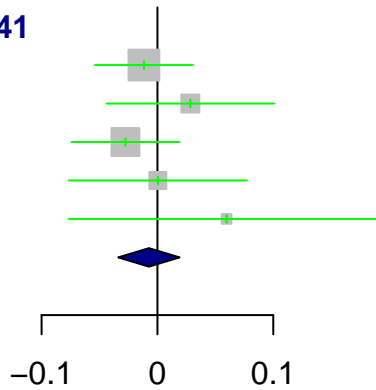

**Study**

**BETA**

**BETA**

**95%-CI**

**rs42854 (G), P=0.008156**

IHGC2016 MA

deCODE MA

DBDS MA

UKBB MA

LUMINA MA

**Fixed effect model**

$I^2 = 28\%$

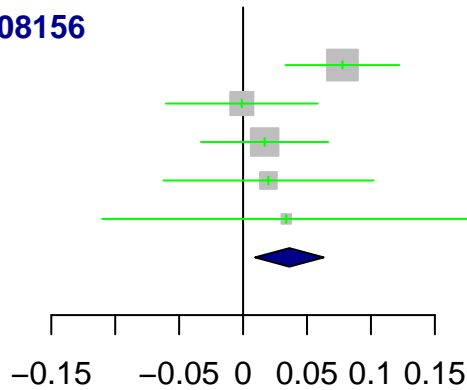

Study

BETA

BETA

95%-CI

**rs12653216 (T), P=0.009285**

IHGC2016 MA

deCODE MA

DBDS MA

UKBB MA

LUMINA MA

**Fixed effect model**

$I^2 = 0\%$

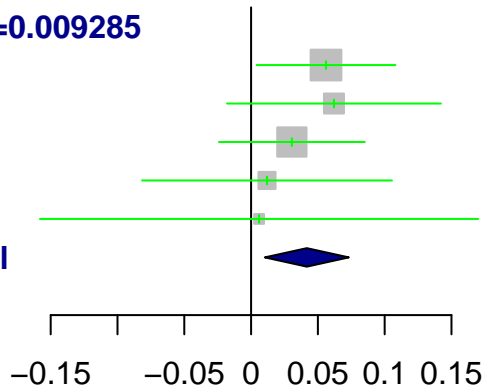

**Study**

**BETA**

**BETA**

**95%-CI**

**rs11957829 (G), P=0.094686**

IHGC2016 MA

deCODE MA

DBDS MA

UKBB MA

LUMINA MA

**Fixed effect model**

$I^2 = 63\%$

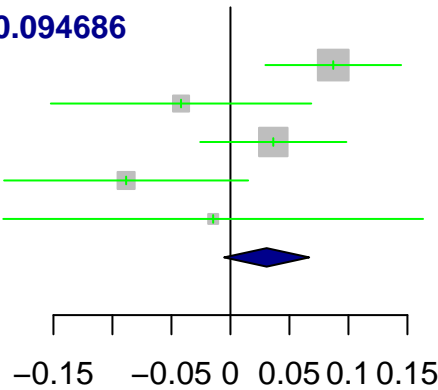

**Study**

**BETA**

**BETA**

**95%-CI**

**rs246326 (T), P=0.029623**

IHGC2016 MA

deCODE MA

DBDS MA

UKBB MA

LUMINA MA

**Fixed effect model**

$I^2 = 0\%$

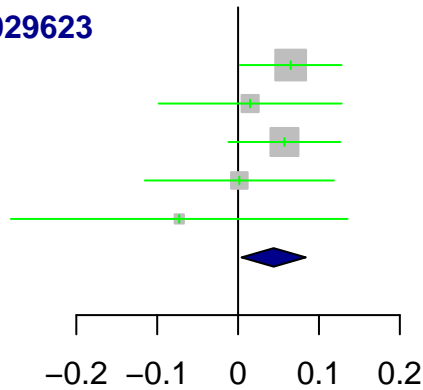

0.07 [0.00; 0.13]

0.01 [-0.10; 0.13]

0.06 [-0.01; 0.13]

0.00 [-0.12; 0.12]

-0.07 [-0.28; 0.14]

**0.04 [0.00; 0.08]**

Study

BETA

BETA

95%-CI

**rs10038882 (T), P=0.048915**

IHGC2016 MA

deCODE MA

DBDS MA

UKBB MA

LUMINA MA

**Fixed effect model**

$I^2 = 0\%$

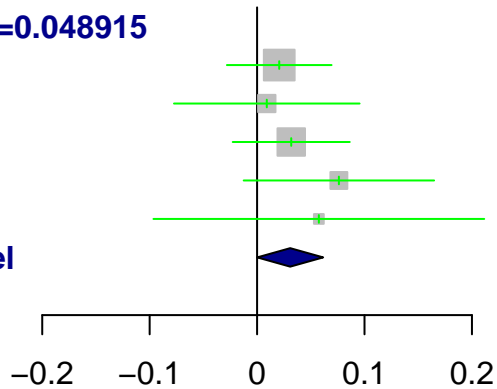

**Study**

**BETA**

**BETA**

**95%-CI**

**rs4705403 (A), P=0.031459**

IHGC2016 MA

deCODE MA

DBDS MA

UKBB MA

LUMINA MA

**Fixed effect model**

$I^2 = 0\%$

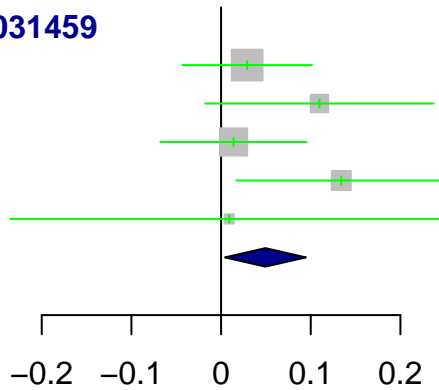

0.03 [-0.04; 0.10]

0.11 [-0.02; 0.24]

0.01 [-0.07; 0.10]

0.13 [ 0.02; 0.25]

0.01 [-0.24; 0.25]

**0.05 [ 0.00; 0.09]**



Study

BETA

BETA

95%-CI

**rs6556059 (T), P=0.109729**

IHGC2016 MA

deCODE MA

DBDS MA

UKBB MA

LUMINA MA

**Fixed effect model**

$I^2 = 27\%$

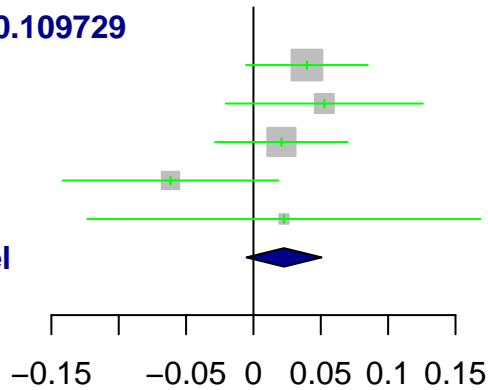

**Study**

**BETA**

**BETA**

**95%-CI**

**rs10866704 (A), P=0.682467**

IHGC2016 MA

deCODE MA

DBDS MA

UKBB MA

LUMINA MA

**Fixed effect model**

$I^2 = 0\%$

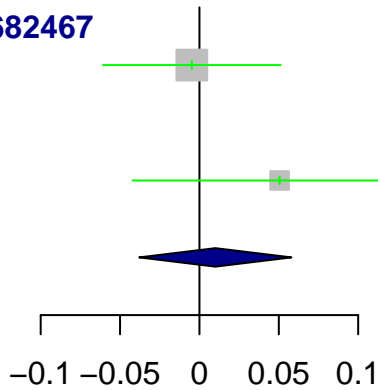

**Study**

**BETA**

**BETA**

**95%-CI**

**rs9349379 (A), P=0.01846**

IHGC2016 MA

deCODE MA

DBDS MA

UKBB MA

LUMINA MA

**Fixed effect model**

$I^2 = 0\%$

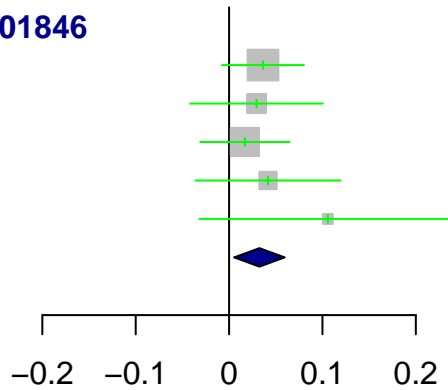

Study

BETA

BETA

95%-CI

**rs9295536 (C), P=0.11049**

IHGC2016 MA

deCODE MA

DBDS MA

UKBB MA

LUMINA MA

**Fixed effect model**

$I^2 = 17\%$

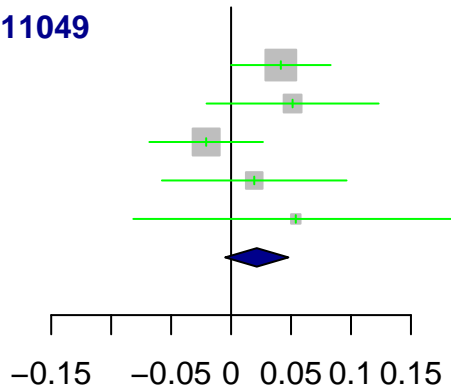

Study

BETA

BETA

95%-CI

**rs9468830 (T), P=0.32157**

IHGC2016 MA

deCODE MA

DBDS MA

UKBB MA

LUMINA MA

**Fixed effect model**

$I^2 = 40\%$

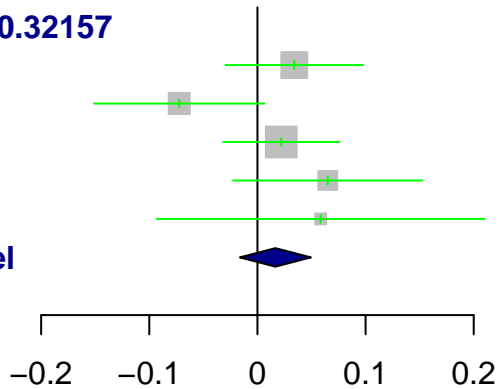

**Study**

**BETA**

**BETA**

**95%-CI**

**rs74434374 (C), P=0.022879**

IHGC2016 MA

deCODE MA

DBDS MA

UKBB MA

LUMINA MA

**Fixed effect model**

$I^2 = 16\%$

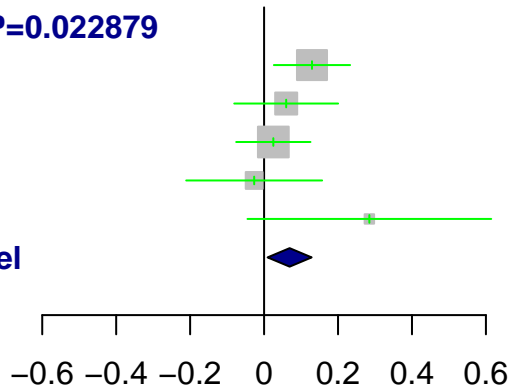

Study

BETA

BETA

95%-CI

**rs10456100 (T), P=0.257897**

IHG2016 MA

deCODE MA

DBDS MA

UKBB MA

LUMINA MA

**Fixed effect model**

$I^2 = 67\%$

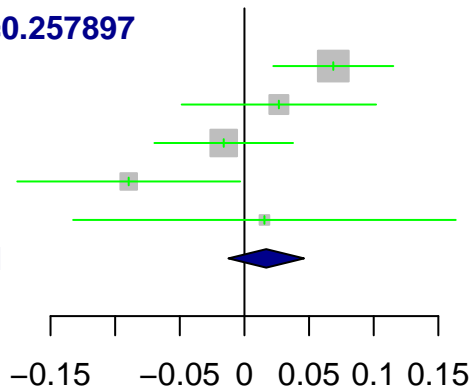

**Study**

**BETA**

**BETA**

**95%-CI**

**rs34273564 (T), P=0.016364**

IHGC2016 MA

deCODE MA

DBDS MA

UKBB MA

LUMINA MA

**Fixed effect model**

$I^2 = 38\%$

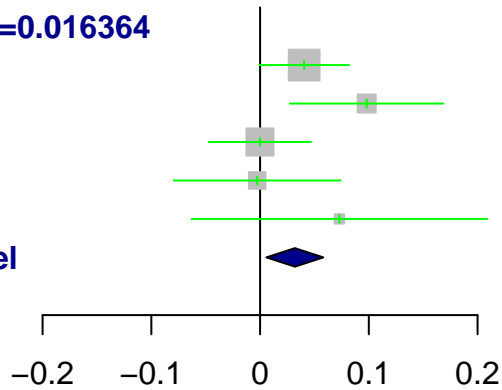



Study

BETA

BETA

95%-CI

**rs11153082 (G), P=1.99e-10**

IHGC2016 MA

deCODE MA

DBDS MA

UKBB MA

LUMINA MA

**Fixed effect model**

$I^2 = 0\%$

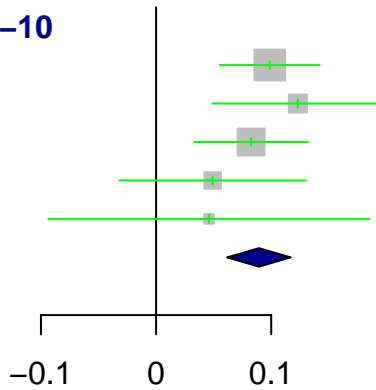

0.10 [ 0.06; 0.14]

0.12 [ 0.05; 0.20]

0.08 [ 0.03; 0.13]

0.05 [ -0.03; 0.13]

0.05 [ -0.09; 0.19]

**0.09 [ 0.06; 0.12]**

-0.1

0

0.1

Study

BETA

BETA

95%-CI

**rs6568677 (A), P=0.616792**

IHGC2016 MA

deCODE MA

DBDS MA

UKBB MA

LUMINA MA

**Fixed effect model**

$I^2 = 0\%$

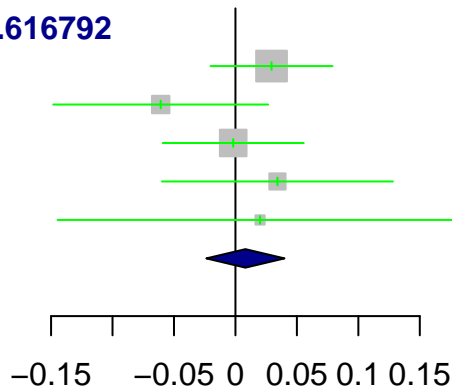

Study

BETA

BETA

95%-CI

**rs28455731 (T), P=0.007284**

IHGC2016 MA

deCODE MA

DBDS MA

UKBB MA

LUMINA MA

**Fixed effect model**

$I^2 = 43\%$

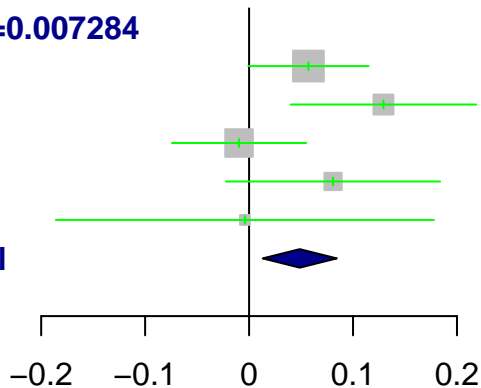

**Study**

**BETA**

**BETA**

**95%-CI**

**rs9383843 (C), P=0.02693**

IHGC2016 MA

deCODE MA

DBDS MA

UKBB MA

LUMINA MA

**Fixed effect model**

$I^2 = 0\%$

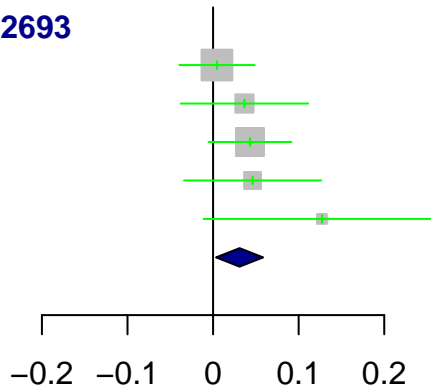

0.00 [-0.04; 0.05]

0.04 [-0.04; 0.11]

0.04 [-0.01; 0.09]

0.05 [-0.03; 0.13]

0.13 [-0.01; 0.27]

**0.03 [ 0.00; 0.06]**

**Study**

**BETA**

**BETA**

**95%-CI**

**rs10234636 (T), P=3.38e-05**

IHGC2016 MA

deCODE MA

DBDS MA

UKBB MA

LUMINA MA

**Fixed effect model**

$I^2 = 63\%$

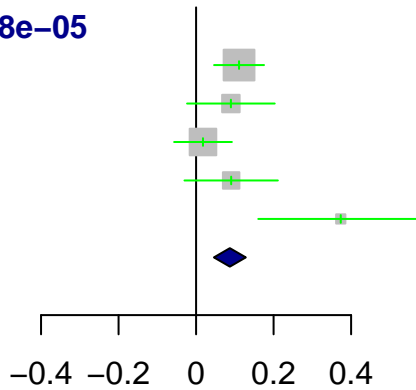

Study

BETA

BETA

95%-CI

**rs13235543 (C), P=0.477232**

IHGC2016 MA

deCODE MA

DBDS MA

UKBB MA

LUMINA MA

**Fixed effect model**

$I^2 = 0\%$

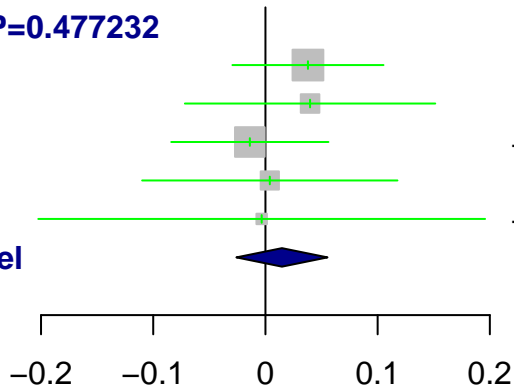

Study

BETA

BETA

95%-CI

**rs56067931 (C), P=0.063491**

IHGC2016 MA

deCODE MA

DBDS MA

UKBB MA

LUMINA MA

**Fixed effect model**

$I^2 = 0\%$

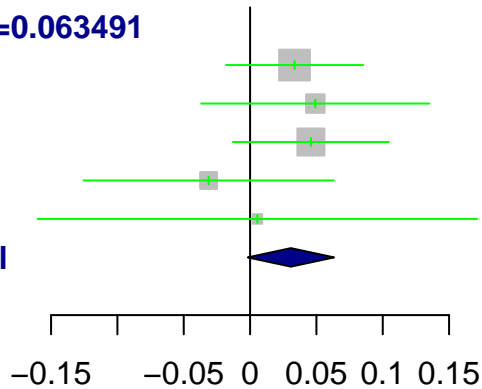

**Study**

**BETA**

**BETA**

**95%-CI**

**rs11782789 (A), P=0.033214**

IHGC2016 MA

deCODE MA

DBDS MA

UKBB MA

LUMINA MA

**Fixed effect model**

$I^2 = 0\%$

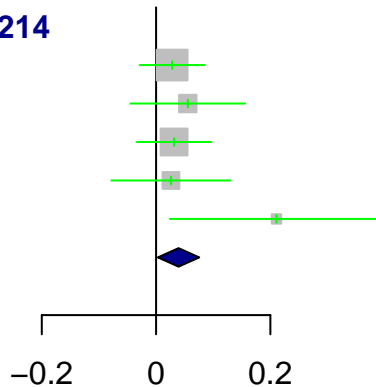



**Study**

**BETA**

**BETA**

**95%-CI**

**rs4739105 (T), P=0.634848**

IHGC2016 MA

deCODE MA

DBDS MA

UKBB MA

LUMINA MA

**Fixed effect model**

$I^2 = 38\%$

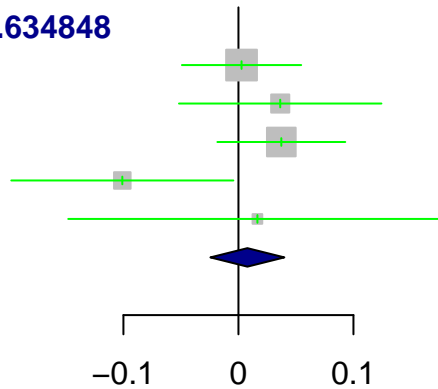

**Study**

**BETA**

**BETA**

**95%-CI**

**rs580845 (A), P=0.03106**

IHGC2016 MA

deCODE MA

DBDS MA

UKBB MA

LUMINA MA

**Fixed effect model**

$I^2 = 17\%$

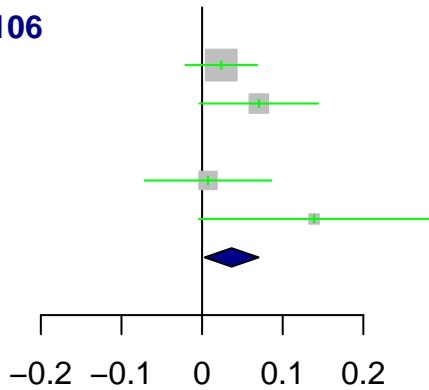

Study

BETA

BETA

95%-CI

**rs10156578 (C), P=0.468665**

IHGC2016 MA

deCODE MA

DBDS MA

UKBB MA

LUMINA MA

**Fixed effect model**

$I^2 = 0\%$

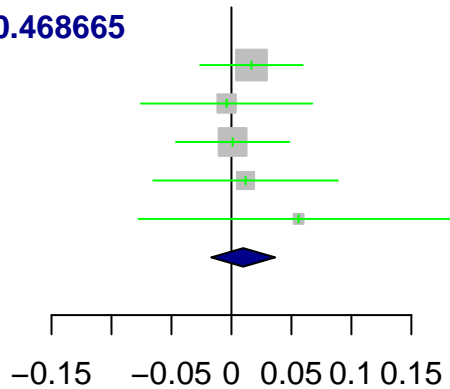

**Study**

**BETA**

**BETA**

**95%-CI**

**rs7034179 (T), P=0.012161**

IHGC2016 MA

deCODE MA

DBDS MA

UKBB MA

LUMINA MA

**Fixed effect model**

$I^2 = 0\%$

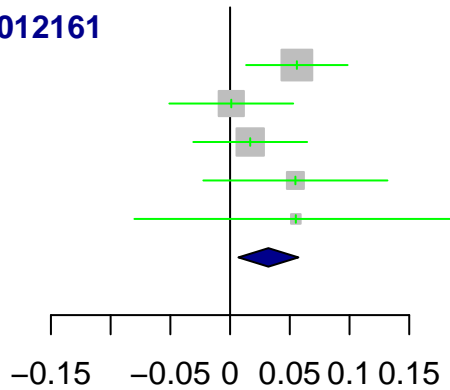

**Study**

**BETA**

**BETA**

**95%-CI**

**rs17723637 (G), P=0.202113**

IHG2016 MA

deCODE MA

DBDS MA

UKBB MA

LUMINA MA

**Fixed effect model**

$I^2 = 0\%$

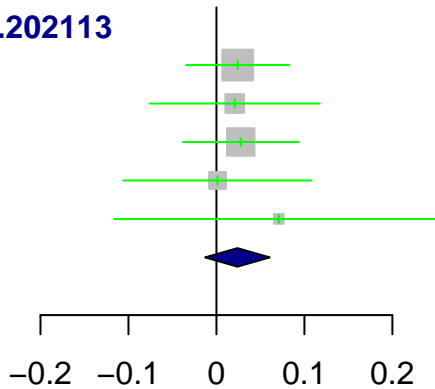

**Study**

**BETA**

**BETA**

**95%-CI**

**rs3891689 (C), P=0.002456**

IHGC2016 MA

deCODE MA

DBDS MA

UKBB MA

LUMINA MA

**Fixed effect model**

$I^2 = 46\%$

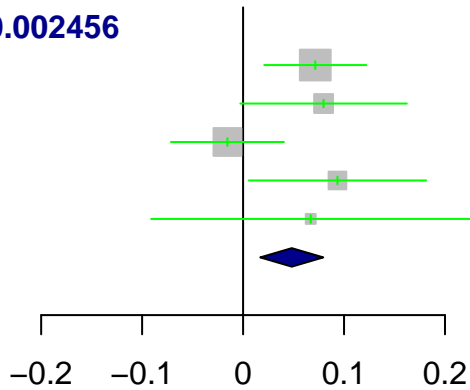

0.07 [ 0.02; 0.12]

0.08 [ 0.00; 0.16]

-0.02 [-0.07; 0.04]

0.09 [ 0.01; 0.18]

0.07 [-0.09; 0.23]

**0.05 [ 0.02; 0.08]**

Study

BETA

BETA

95%-CI

**rs4278223 (T), P=0.79585**

IHGC2016 MA

deCODE MA

DBDS MA

UKBB MA

LUMINA MA

**Fixed effect model**

$I^2 = 0\%$

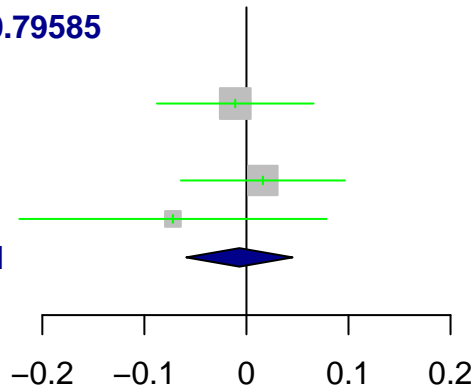

**Study**

**BETA**

**BETA**

**95%-CI**

**rs7916911 (T), P=0.127629**

IHGC2016 MA

deCODE MA

DBDS MA

UKBB MA

LUMINA MA

**Fixed effect model**

$I^2 = 53\%$

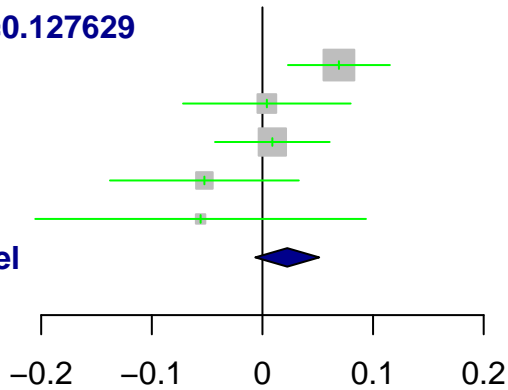



Study

BETA

BETA

95%-CI

**rs10828247 (G), P=0.050104**

IHGC2016 MA

deCODE MA

DBDS MA

UKBB MA

LUMINA MA

**Fixed effect model**

$I^2 = 0\%$

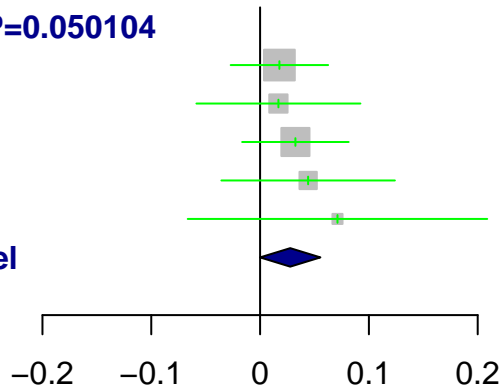

Study

BETA

BETA

95%-CI

**rs2274224 (G), P=4.57e-05**

IHGC2016 MA

deCODE MA

DBDS MA

UKBB MA

LUMINA MA

**Fixed effect model**

$I^2 = 13\%$

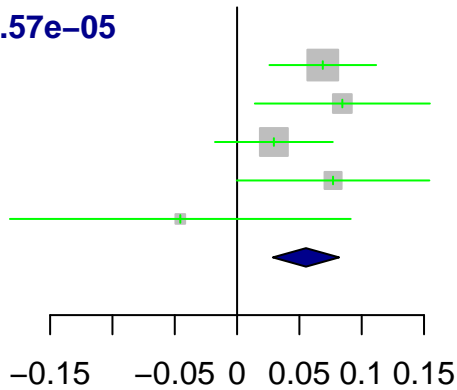

**Study**

**BETA**

**BETA**

**95%-CI**

**rs12260159 (G), P=0.16034**

IHGC2016 MA

deCODE MA

DBDS MA

UKBB MA

LUMINA MA

**Fixed effect model**

$I^2 = 0\%$

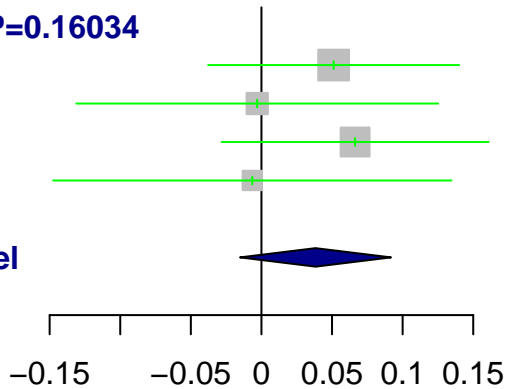

**Study**

**BETA**

**BETA**

**95%-CI**

**rs12260436 (C), P=0.000374**

IHGC2016 MA

deCODE MA

DBDS MA

UKBB MA

LUMINA MA

**Fixed effect model**

$I^2 = 0\%$

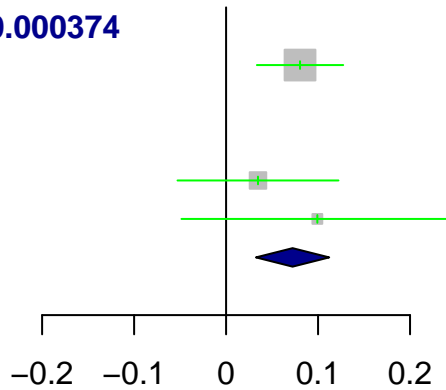

Study

BETA

BETA

95%-CI

**rs869432 (A), P=0.281249**

IHGC2016 MA

deCODE MA

DBDS MA

UKBB MA

LUMINA MA

**Fixed effect model**

$I^2 = 0\%$

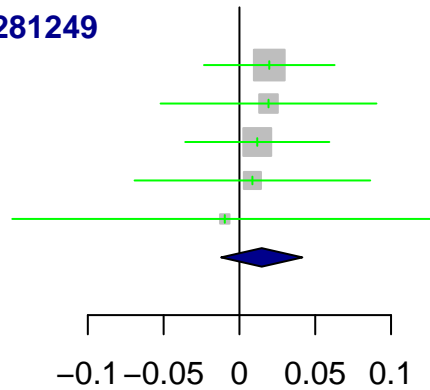

0.02 [-0.02; 0.06]

0.02 [-0.05; 0.09]

0.01 [-0.04; 0.06]

0.01 [-0.07; 0.09]

-0.01 [-0.15; 0.13]

**0.01 [-0.01; 0.04]**

-0.1 -0.05 0 0.05 0.1

**Study**

**BETA**

**BETA**

**95%-CI**

**rs2672592 (T), P=0.252308**

IHGC2016 MA

deCODE MA

DBDS MA

UKBB MA

LUMINA MA

**Fixed effect model**

$I^2 = 47\%$

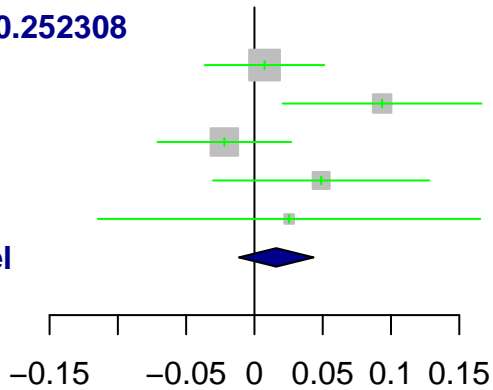

**Study**

**BETA**

**BETA**

**95%-CI**

**rs11248546 (C), P=0.068498**

IHGC2016 MA

deCODE MA

DBDS MA

UKBB MA

LUMINA MA

**Fixed effect model**

$I^2 = 0\%$

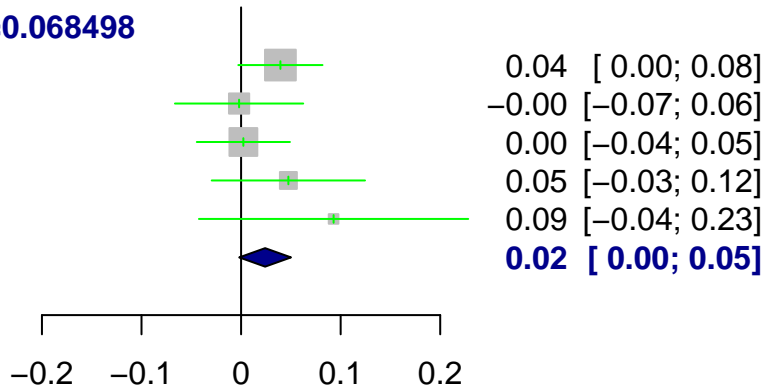

**Study**

**BETA**

**BETA**

**95%-CI**

**rs200314499 (D), P=0.277931**

IHGC2016 MA

deCODE MA

DBDS MA

UKBB MA

LUMINA MA

**Fixed effect model**

$I^2 = 0\%$

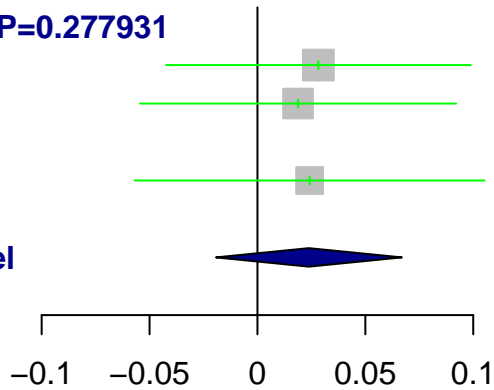



Study

BETA

BETA

95%-CI

**rs12295710 (T), P=0.208036**

IHGC2016 MA

deCODE MA

DBDS MA

UKBB MA

LUMINA MA

**Fixed effect model**

$I^2 = 23\%$

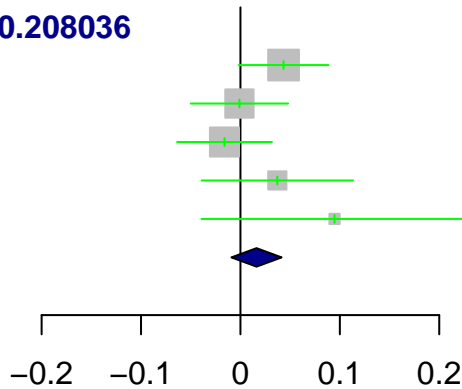

**Study**

**BETA**

**BETA**

**95%-CI**

**rs4910165 (G), P=2.65e-06**

IHGC2016 MA

deCODE MA

DBDS MA

UKBB MA

LUMINA MA

**Fixed effect model**

$I^2 = 68\%$

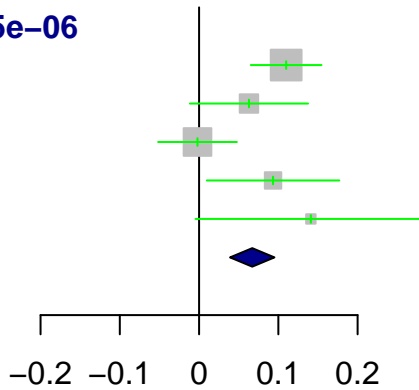

**Study**

**BETA**

**BETA**

**95%-CI**

**rs1003194 (A), P=0.000793**

IHGC2016 MA

deCODE MA

DBDS MA

UKBB MA

LUMINA MA

**Fixed effect model**

$I^2 = 0\%$

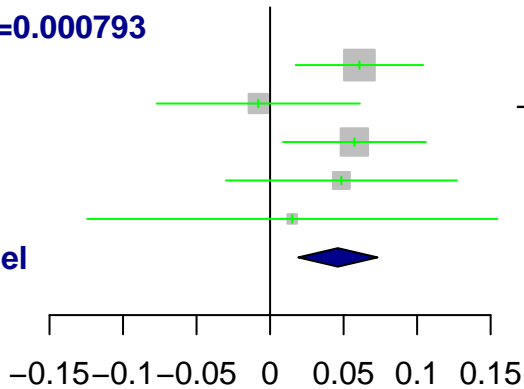

**Study**

**BETA**

**BETA**

**95%-CI**

**rs11031122 (C), P=6.45e-09**

IHGC2016 MA

deCODE MA

DBDS MA

UKBB MA

LUMINA MA

**Fixed effect model**

$I^2 = 11\%$

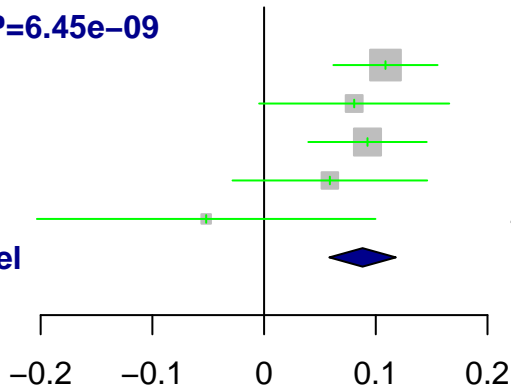

**Study**

**BETA**

**BETA**

**95%-CI**

**rs7932866 (A), P=0.000257**

IHGC2016 MA

deCODE MA

DBDS MA

UKBB MA

LUMINA MA

**Fixed effect model**

$I^2 = 0\%$

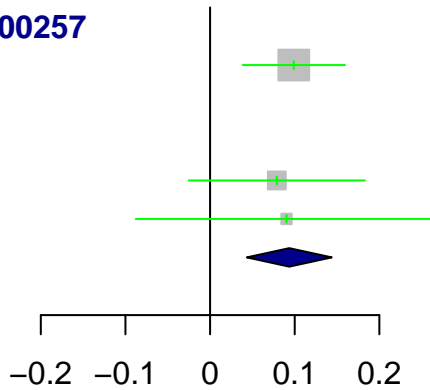

**Study**

**BETA**

**BETA**

**95%-CI**

**rs12787928 (A), P=0.017312**

IHGC2016 MA

deCODE MA

DBDS MA

UKBB MA

LUMINA MA

**Fixed effect model**

$I^2 = 0\%$

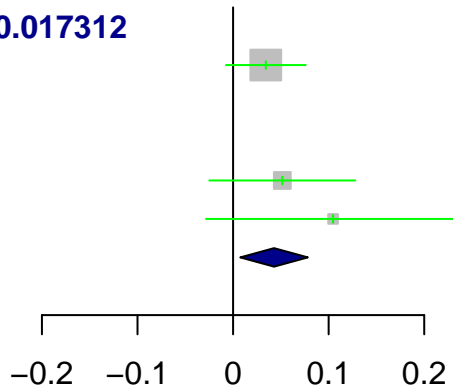

Study

BETA

BETA

95%-CI

**rs566673 (G), P=0.619146**

IHG2016 MA

deCODE MA

DBDS MA

UKBB MA

LUMINA MA

**Fixed effect model**

$I^2 = 20\%$

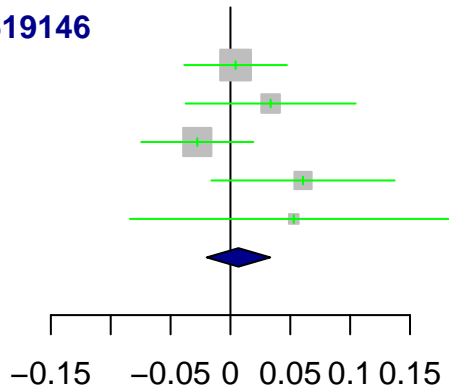

**Study**

**BETA**

**BETA**

**95%-CI**

**rs12226331 (T), P=0.219593**

IHGC2016 MA

deCODE MA

DBDS MA

UKBB MA

LUMINA MA

**Fixed effect model**

$I^2 = 0\%$

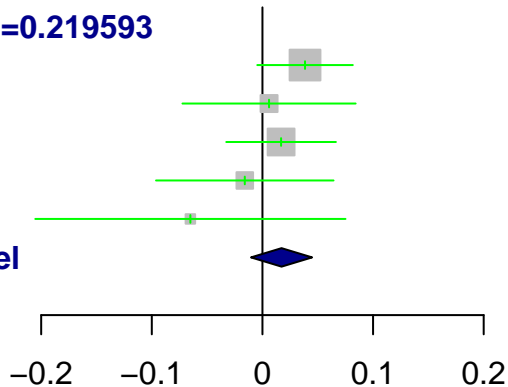



Study

BETA

BETA

95%-CI

**rs10894756 (G), P=0.00379**

IHGC2016 MA

deCODE MA

DBDS MA

UKBB MA

LUMINA MA

**Fixed effect model**

$I^2 = 0\%$

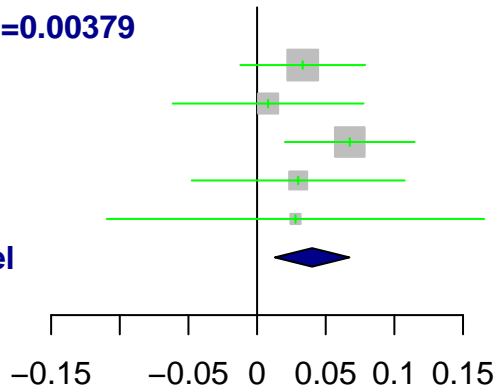

**Study**

**BETA**

**BETA**

**95%-CI**

**rs2160875 (C), P=0.000131**

IHGC2016 MA

deCODE MA

DBDS MA

UKBB MA

LUMINA MA

**Fixed effect model**

$I^2 = 0\%$

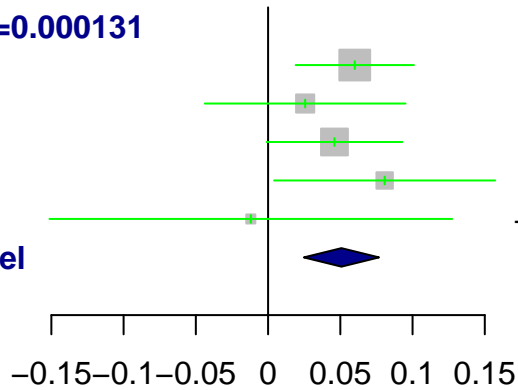

**Study**

**BETA**

**BETA**

**95%-CI**

**rs1458170 (C), P=0.023828**

IHGC2016 MA

deCODE MA

DBDS MA

UKBB MA

LUMINA MA

**Fixed effect model**

$I^2 = 0\%$

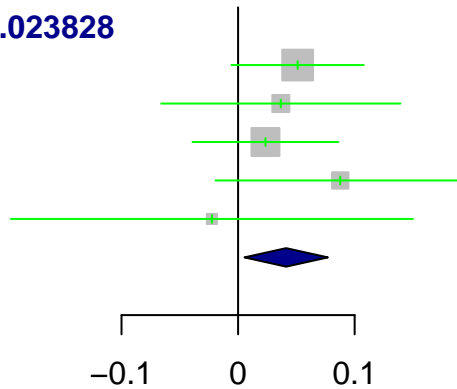

**Study**

**BETA**

**BETA**

**95%-CI**

**rs11172113 (T), P=2.65e-08**

IHGC2016 MA

deCODE MA

DBDS MA

UKBB MA

LUMINA MA

**Fixed effect model**

$I^2 = 0\%$

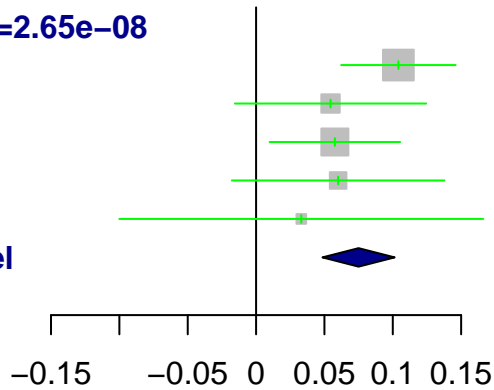

**Study**

**BETA**

**BETA**

**95%-CI**

**rs4842676 (C), P=0.104546**

IHGC2016 MA

deCODE MA

DBDS MA

UKBB MA

LUMINA MA

**Fixed effect model**

$I^2 = 48\%$

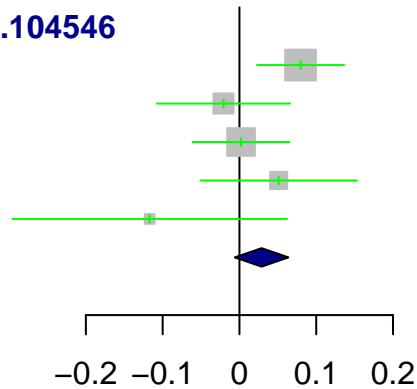

0.08 [0.02; 0.14]

-0.02 [-0.11; 0.07]

0.00 [-0.06; 0.07]

0.05 [-0.05; 0.15]

-0.12 [-0.30; 0.06]

**0.03 [-0.01; 0.06]**

Study

BETA

BETA

95%-CI

**rs10777902 (A), P=0.09691**

IHGC2016 MA

deCODE MA

DBDS MA

UKBB MA

LUMINA MA

**Fixed effect model**

$I^2 = 0\%$

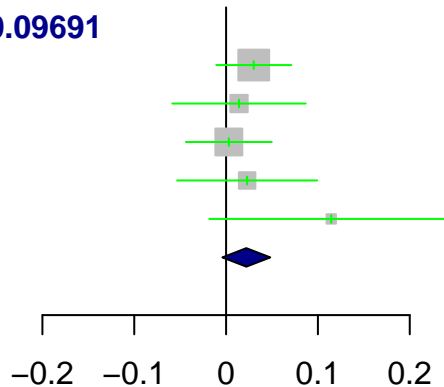

Study

BETA

BETA

95%-CI

**rs1271309 (G), P=0.15268**

IHG2016 MA

deCODE MA

DBDS MA

UKBB MA

LUMINA MA

**Fixed effect model**

$I^2 = 14\%$

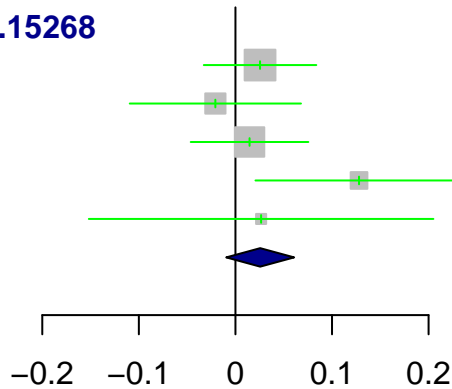

Study

BETA

BETA

95%-CI

**rs7335684 (G), P=0.41231**

IHGC2016 MA

deCODE MA

DBDS MA

UKBB MA

LUMINA MA

**Fixed effect model**

$I^2 = 0\%$

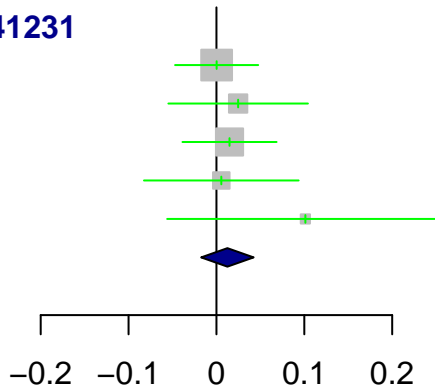



Study

BETA

BETA

95%-CI

**rs7996252 (T), P=0.029478**

IHGC2016 MA

deCODE MA

DBDS MA

UKBB MA

LUMINA MA

**Fixed effect model**

$I^2 = 0\%$

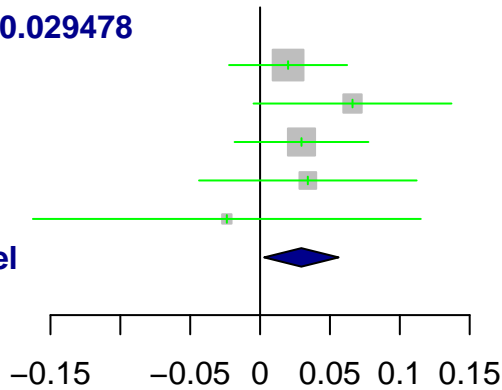

Study

BETA

BETA

95%-CI

**rs2000660 (A), P=0.000404**

IHGC2016 MA

deCODE MA

DBDS MA

UKBB MA

LUMINA MA

**Fixed effect model**

$I^2 = 11\%$

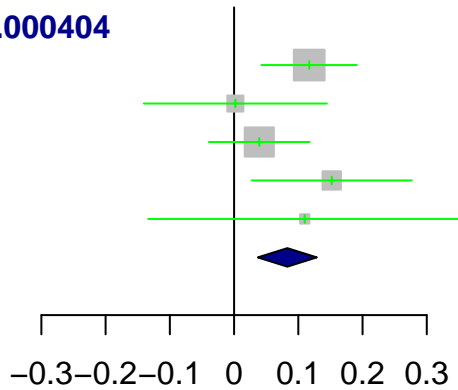

**Study**

**BETA**

**BETA**

**95%-CI**

**rs1245463 (A), P=0.708885**

IHGC2016 MA

deCODE MA

DBDS MA

UKBB MA

LUMINA MA

**Fixed effect model**

$I^2 = 0\%$

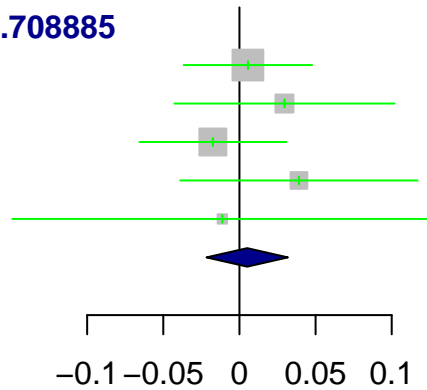

0.01 [-0.04; 0.05]

0.03 [-0.04; 0.10]

-0.02 [-0.07; 0.03]

0.04 [-0.04; 0.12]

-0.01 [-0.15; 0.13]

**0.01 [-0.02; 0.03]**

**Study**

**BETA**

**BETA**

**95%-CI**

**rs1542668 (G), P=0.001571**

IHGC2016 MA

deCODE MA

DBDS MA

UKBB MA

LUMINA MA

**Fixed effect model**

$I^2 = 0\%$

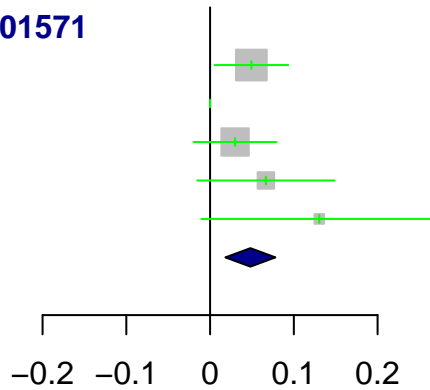

Study

BETA

BETA

95%-CI

**rs28756401 (G), P=0.137755**

IHGC2016 MA

deCODE MA

DBDS MA

UKBB MA

LUMINA MA

**Fixed effect model**

$I^2 = 0\%$

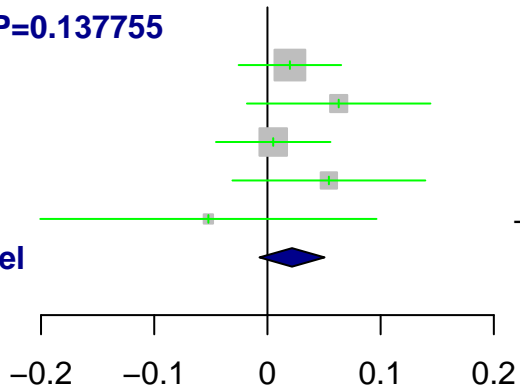

Study

BETA

BETA

95%-CI

**rs55707505 (T), P=6.65e-05**

IHGC2016 MA

deCODE MA

DBDS MA

UKBB MA

LUMINA MA

**Fixed effect model**

$I^2 = 46\%$

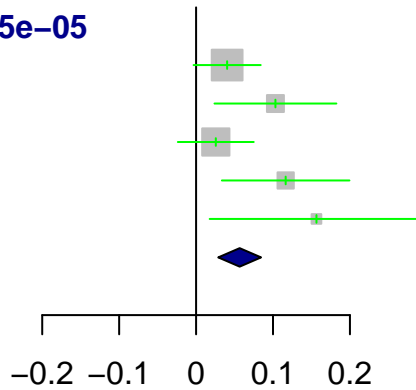

Study

BETA

BETA

95%-CI

**rs75002882 (G), P=0.124363**

IHGC2016 MA

deCODE MA

DBDS MA

UKBB MA

LUMINA MA

**Fixed effect model**

$I^2 = 0\%$

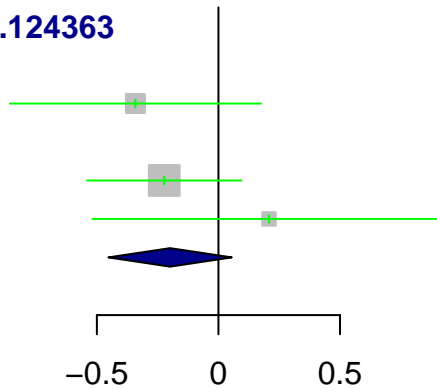

**Study**

**BETA**

**BETA**

**95%-CI**

**rs11624776 (A), P=0.105792**

IHGC2016 MA

deCODE MA

DBDS MA

UKBB MA

LUMINA MA

**Fixed effect model**

$I^2 = 0\%$

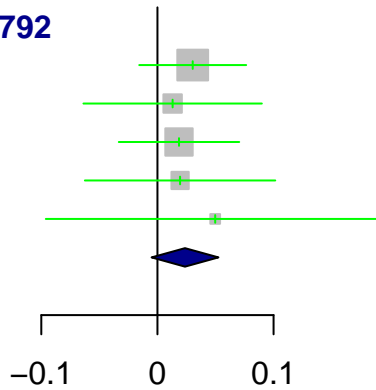



Study

BETA

BETA

95%-CI

**rs28929474 (T), P=0.931497**

IHGC2016 MA

deCODE MA

DBDS MA

UKBB MA

LUMINA MA

**Fixed effect model**

$I^2 = 0\%$

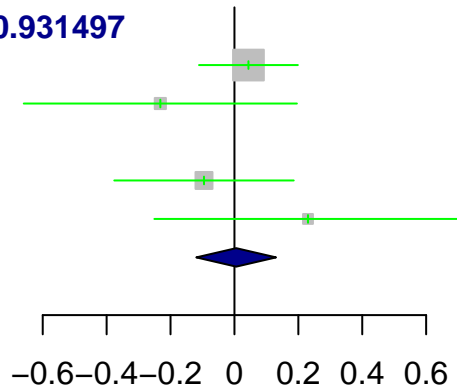

**Study**

**BETA**

**BETA**

**95%-CI**

**rs12708529 (A), P=0.015338**

IHGC2016 MA

deCODE MA

DBDS MA

UKBB MA

LUMINA MA

**Fixed effect model**

$I^2 = 0\%$

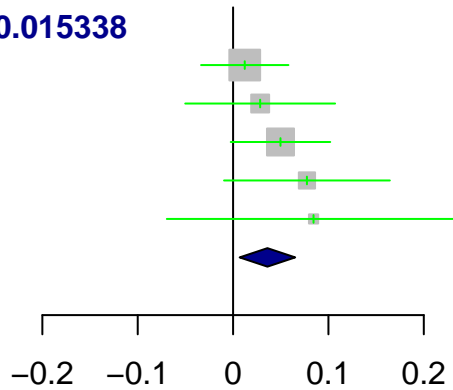

0.01 [-0.03; 0.06]

0.03 [-0.05; 0.11]

0.05 [ 0.00; 0.10]

0.08 [-0.01; 0.16]

0.08 [-0.07; 0.24]

**0.04 [ 0.01; 0.07]**

-0.2 -0.1 0 0.1 0.2

**Study**

**BETA**

**BETA**

**95%-CI**

**rs12598836 (G), P=2.81e-08**

IHGC2016 MA

deCODE MA

DBDS MA

UKBB MA

LUMINA MA

**Fixed effect model**

$I^2 = 0\%$

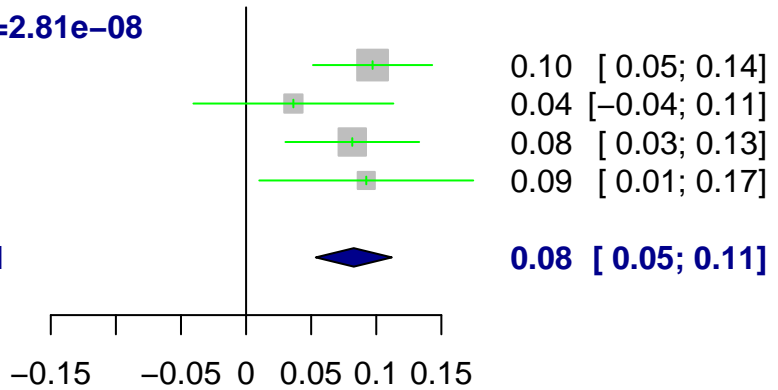

Study

BETA

BETA

95%-CI

**rs8046696 (T), P=0.000783**

IHGC2016 MA

deCODE MA

DBDS MA

UKBB MA

LUMINA MA

**Fixed effect model**

$I^2 = 0\%$

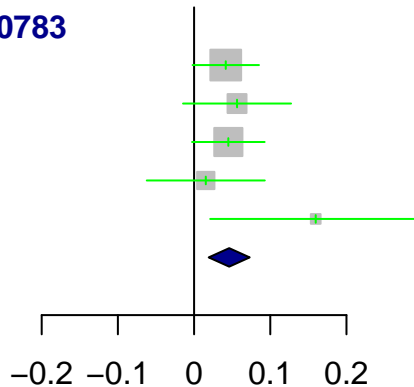

**Study**

**BETA**

**BETA**

**95%-CI**

**rs8052831 (G), P=0.147804**

IHGC2016 MA

deCODE MA

DBDS MA

UKBB MA

LUMINA MA

**Fixed effect model**

$I^2 = 0\%$

0.01 [-0.04; 0.06]

-0.01 [-0.09; 0.07]

0.05 [ 0.00; 0.10]

0.01 [-0.07; 0.09]

0.01 [-0.13; 0.16]

**0.02 [-0.01; 0.05]**

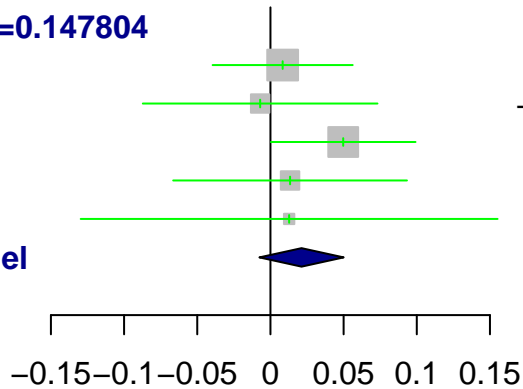

**Study**

**BETA**

**BETA**

**95%-CI**

**rs9894634 (C), P=0.079835**

IHGC2016 MA

deCODE MA

DBDS MA

UKBB MA

LUMINA MA

**Fixed effect model**

$I^2 = 0\%$

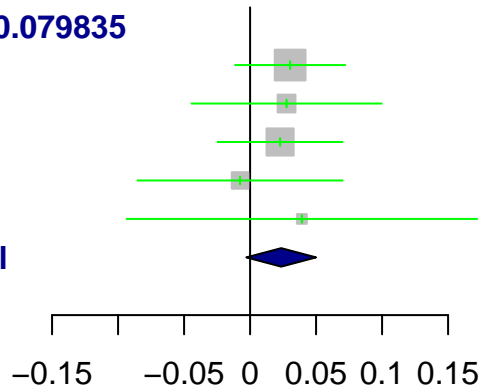

**Study**

**BETA**

**BETA**

**95%-CI**

**rs34914463 (T), P=0.005702**

IHGC2016 MA

deCODE MA

DBDS MA

UKBB MA

LUMINA MA

**Fixed effect model**

$I^2 = 0\%$

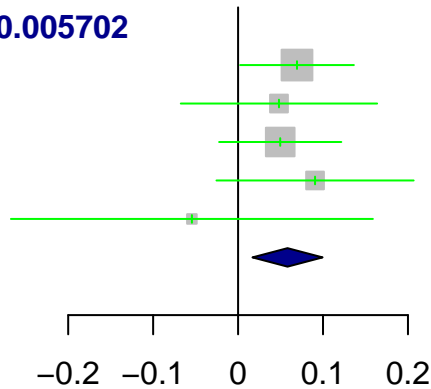

0.07 [0.00; 0.14]

0.05 [-0.07; 0.16]

0.05 [-0.02; 0.12]

0.09 [-0.03; 0.21]

-0.05 [-0.27; 0.16]

**0.06 [0.02; 0.10]**

Study

BETA

BETA

95%-CI

**rs11652860 (G), P=0.018272**

IHGC2016 MA

deCODE MA

DBDS MA

UKBB MA

LUMINA MA

**Fixed effect model**

$I^2 = 11\%$

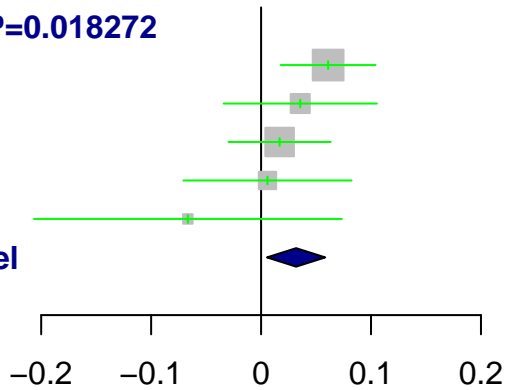



Study

BETA

BETA

95%-CI

**rs2119930 (G), P=0.00821**

IHGC2016 MA

deCODE MA

DBDS MA

UKBB MA

LUMINA MA

**Fixed effect model**

$I^2 = 0\%$

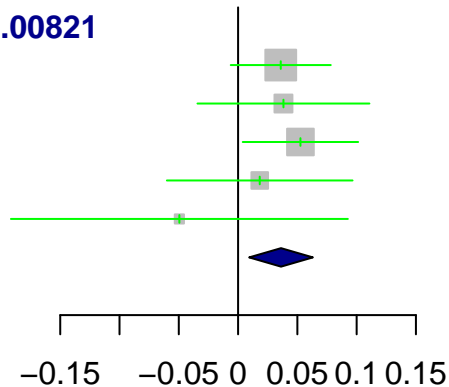

**Study**

**BETA**

**BETA**

**95%-CI**

**rs12452590 (G), P=0.007228**

IHGC2016 MA

deCODE MA

DBDS MA

UKBB MA

LUMINA MA

**Fixed effect model**

$I^2 = 0\%$

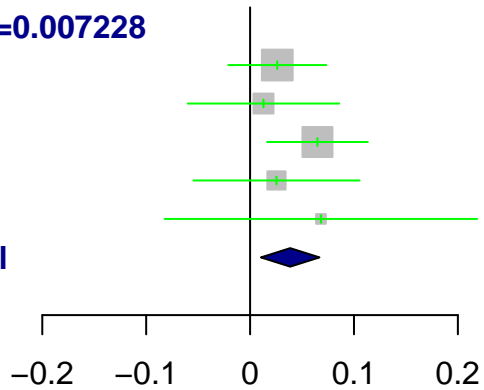

0.03 [-0.02; 0.07]

0.01 [-0.06; 0.09]

0.06 [0.02; 0.11]

0.03 [-0.05; 0.11]

0.07 [-0.08; 0.22]

**0.04 [0.01; 0.07]**

-0.2 -0.1 0 0.1 0.2

Study

BETA

BETA

95%-CI

**rs1285294 (C), P=0.107773**

IHGC2016 MA

deCODE MA

DBDS MA

UKBB MA

LUMINA MA

**Fixed effect model**

$I^2 = 47\%$

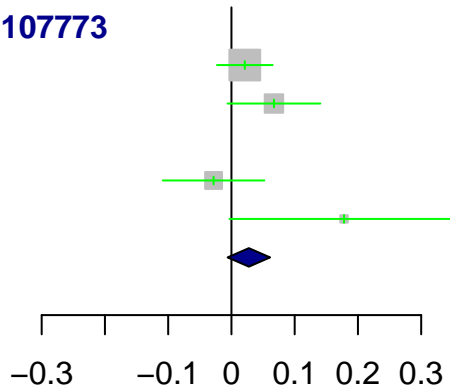

**Study**

**BETA**

**BETA**

**95%-CI**

**rs8077768 (C), P=0.074032**

IHGC2016 MA

deCODE MA

DBDS MA

UKBB MA

LUMINA MA

**Fixed effect model**

$I^2 = 39\%$

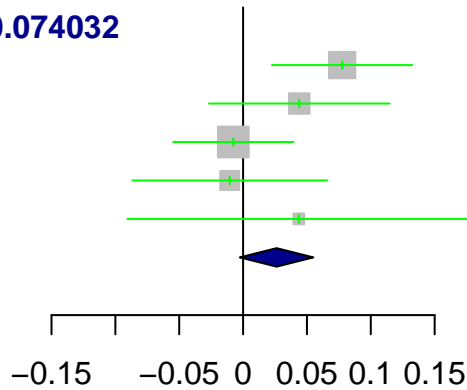

**Study**

**BETA**

**BETA**

**95%-CI**

**rs7506921 (A), P=0.090154**

IHGC2016 MA

deCODE MA

DBDS MA

UKBB MA

LUMINA MA

**Fixed effect model**

$I^2 = 0\%$

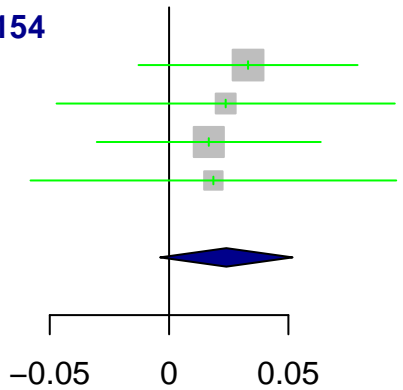

0.03 [-0.01; 0.08]

0.02 [-0.05; 0.09]

0.02 [-0.03; 0.06]

0.02 [-0.06; 0.10]

**0.02 [ 0.00; 0.05]**

-0.05 0 0.05

**Study**

**BETA**

**BETA**

**95%-CI**

**rs1019990 (C), P=0.086489**

IHGC2016 MA

deCODE MA

DBDS MA

UKBB MA

LUMINA MA

**Fixed effect model**

$I^2 = 34\%$

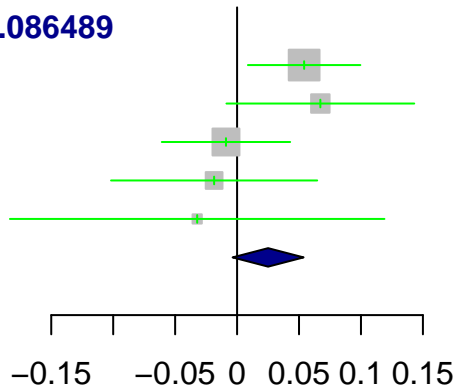

0.05 [0.01; 0.10]

0.07 [-0.01; 0.14]

-0.01 [-0.06; 0.04]

-0.02 [-0.10; 0.06]

-0.03 [-0.18; 0.12]

**0.03 [0.00; 0.05]**

Study

BETA

BETA

95%-CI

**rs8087942 (A), P=0.505912**

IHGC2016 MA

deCODE MA

DBDS MA

UKBB MA

LUMINA MA

**Fixed effect model**

$I^2 = 0\%$

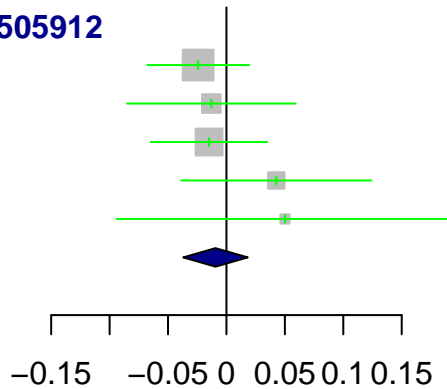

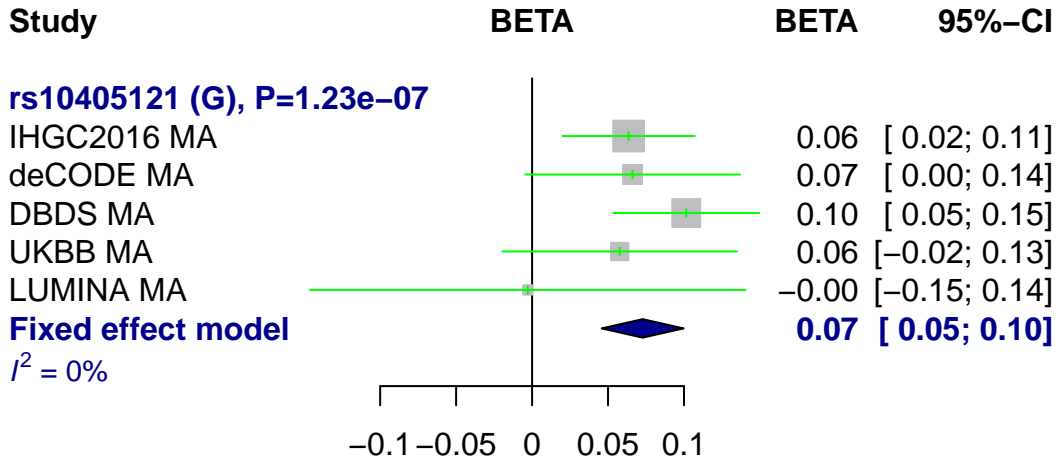



**Study**

**BETA**

**BETA**

**95%-CI**

**rs74182632 (A), P=0.001355**

IHGC2016 MA

deCODE MA

DBDS MA

UKBB MA

LUMINA MA

**Fixed effect model**

$I^2 = 45\%$

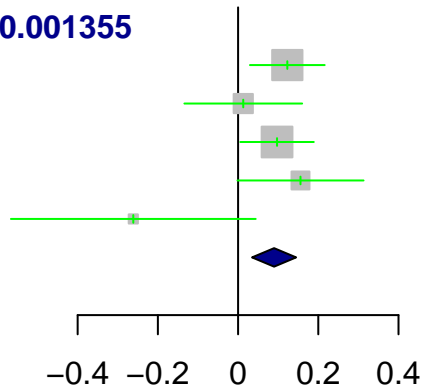

0.12 [0.03; 0.22]

0.01 [-0.13; 0.16]

0.10 [0.01; 0.19]

0.16 [0.00; 0.31]

-0.26 [-0.57; 0.04]

**0.09 [0.03; 0.14]**

**Study**

**BETA**

**BETA**

**95%-CI**

**rs1982072 (A), P=0.002129**

IHGC2016 MA

deCODE MA

DBDS MA

UKBB MA

LUMINA MA

**Fixed effect model**

$I^2 = 0\%$

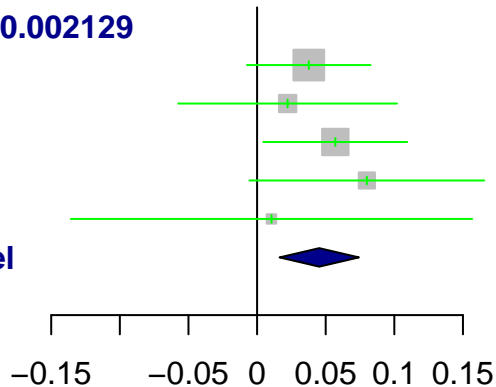

**Study**

**BETA**

**BETA 95%-CI**

**rs111404218 (G), P=0.041637**

IHGC2016 MA

deCODE MA

DBDS MA

UKBB MA

LUMINA MA

**Fixed effect model**

not applicable

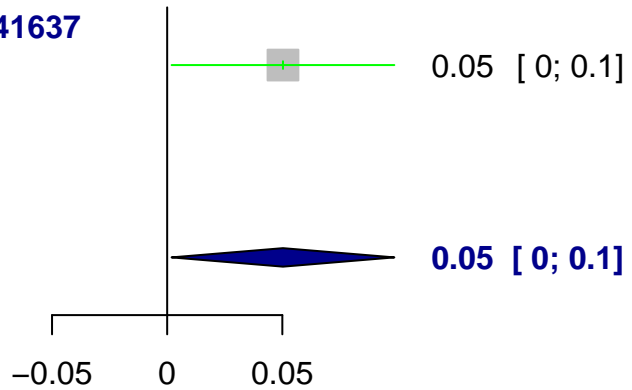

**Study**

**BETA**

**BETA**

**95%-CI**

**rs4814864 (C), P=0.002877**

IHGC2016 MA

deCODE MA

DBDS MA

UKBB MA

LUMINA MA

**Fixed effect model**

$I^2 = 0\%$

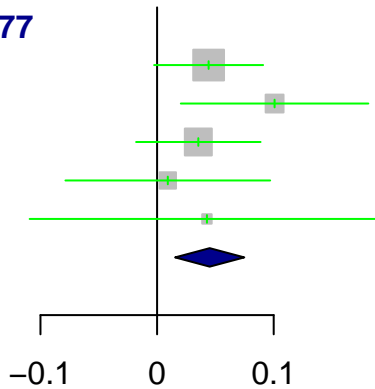

Study

BETA

BETA

95%-CI

**rs6057599 (T), P=0.008279**

IHGC2016 MA

deCODE MA

DBDS MA

UKBB MA

LUMINA MA

**Fixed effect model**

$I^2 = 0\%$

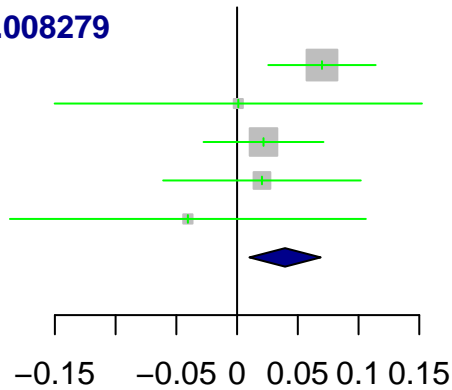

**Study**

**BETA**

**BETA**

**95%-CI**

**rs910187 (G), P=0.076907**

IHGC2016 MA

deCODE MA

DBDS MA

UKBB MA

LUMINA MA

**Fixed effect model**

$I^2 = 0\%$

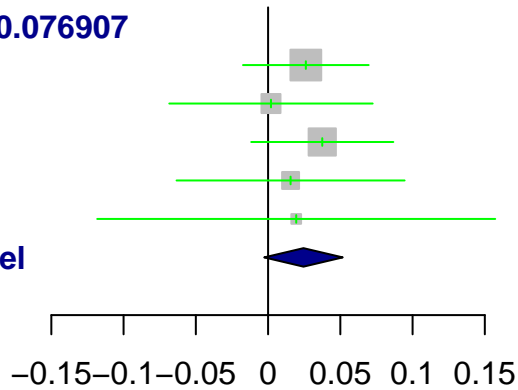

**Study**

**BETA**

**BETA**

**95%-CI**

**rs28451064 (G), P=0.007204**

IHGC2016 MA

deCODE MA

DBDS MA

UKBB MA

LUMINA MA

**Fixed effect model**

$I^2 = 14\%$

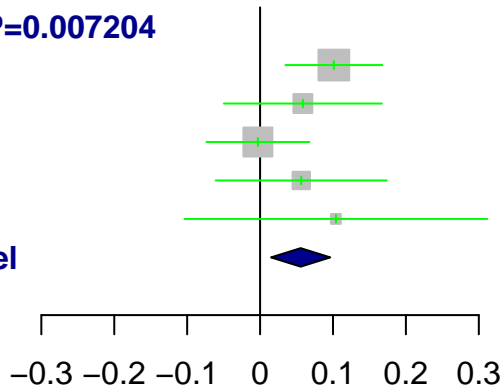

Study

BETA

BETA

95%-CI

**rs764508 (C), P=0.002508**

IHGC2016 MA

deCODE MA

DBDS MA

UKBB MA

LUMINA MA

**Fixed effect model**

$I^2 = 40\%$

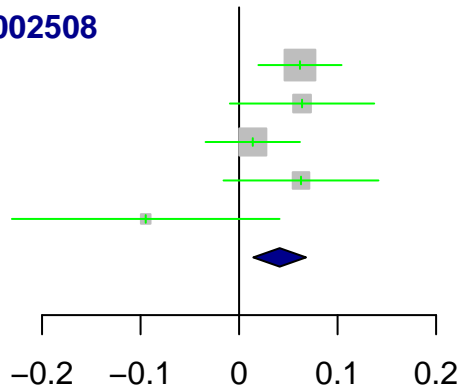



Study

BETA

BETA

95%-CI

**rs625686 (C), P=0.449147**

IHGC2016 MA

deCODE MA

DBDS MA

UKBB MA

LUMINA MA

**Fixed effect model**

$I^2 = 18\%$

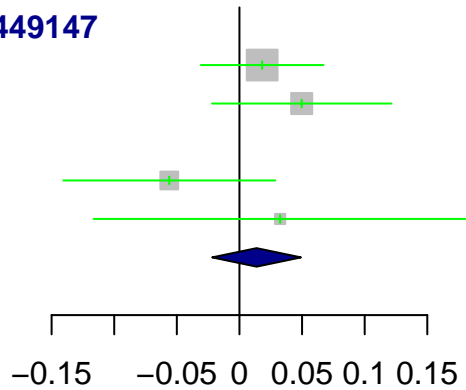

**Study**

**BETA**

**BETA**

**95%-CI**

**rs1507220 (A), P=0.163041**

IHGC2016 MA

deCODE MA

DBDS MA

UKBB MA

LUMINA MA

**Fixed effect model**

$I^2 = 62\%$

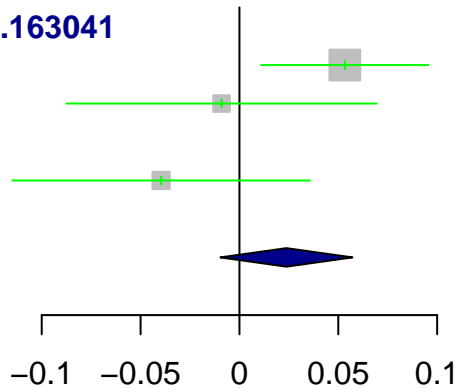

0.05 [0.01; 0.10]

-0.01 [-0.09; 0.07]

-0.04 [-0.11; 0.04]

**0.02 [-0.01; 0.06]**

**Study**

**BETA**

**BETA**

**95%-CI**

**rs4403550 (T), P=5.95e-05**

IHGC2016 MA

deCODE MA

DBDS MA

UKBB MA

LUMINA MA

**Fixed effect model**

$I^2 = 21\%$

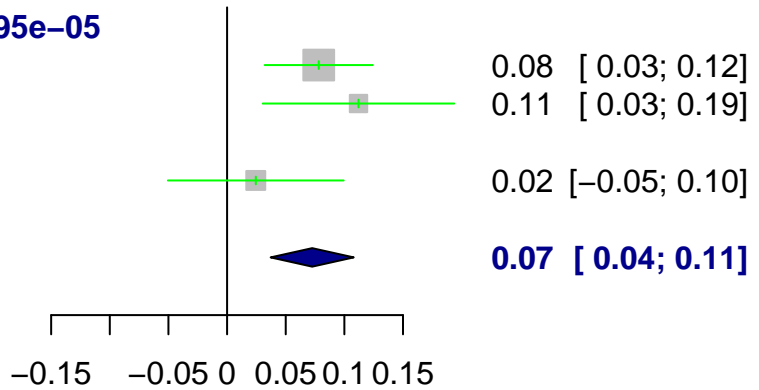

Supplement: Supplementary file [file media-7.pdf]
