# Supplementary material for: Genome-wide analysis of 102,084 migraine cases identifies 123 risk loci and subtype-specific risk alleles
Source: bioRxiv or medRxiv preprint supplement (doi:10.1101/2021.01.20.21249647), 2021-01-25

# PRDM16 (rs10218452)

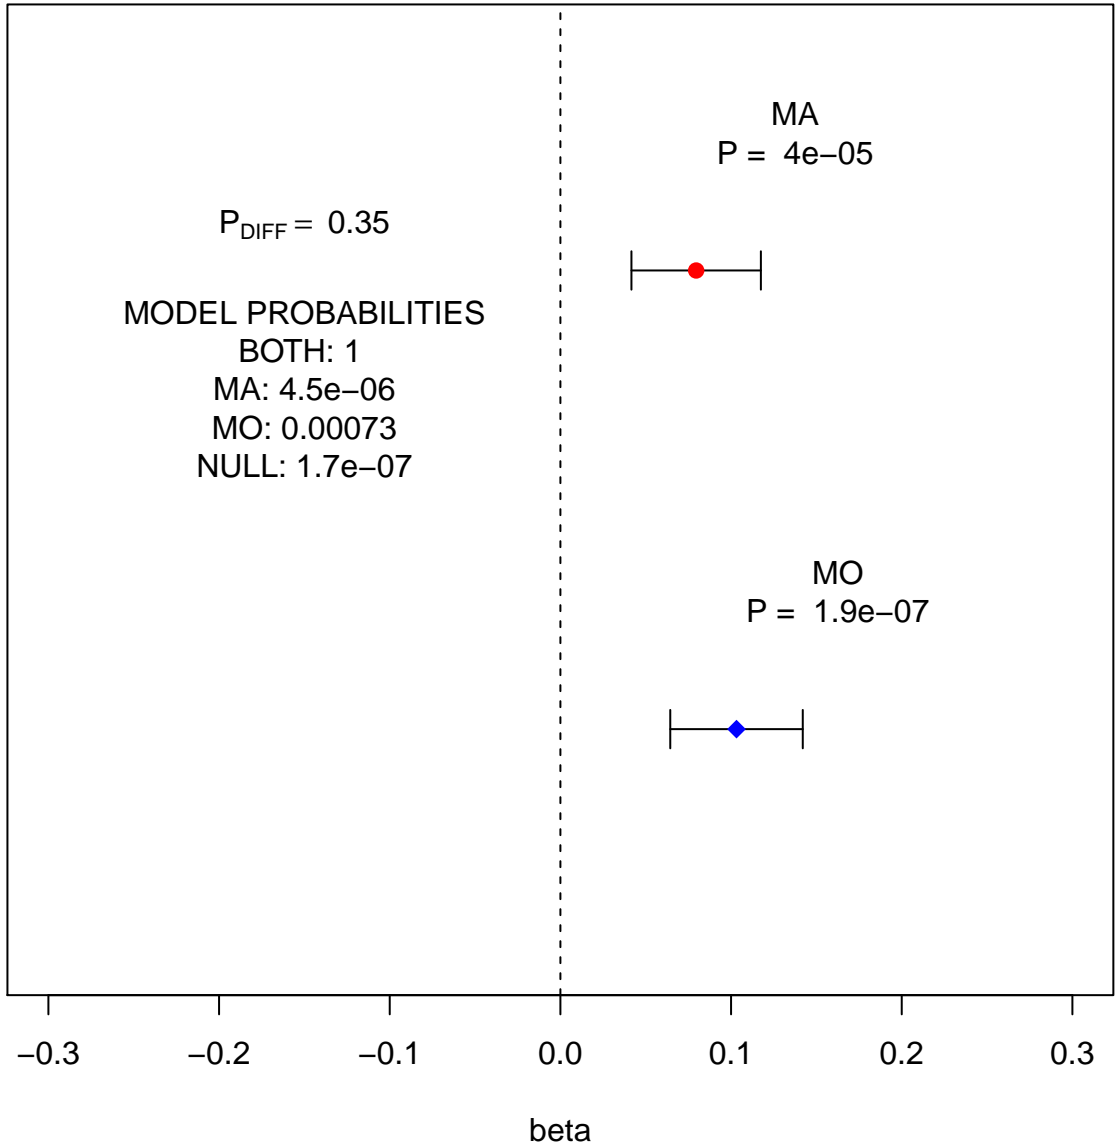

# CAMTA1 (rs10128028)

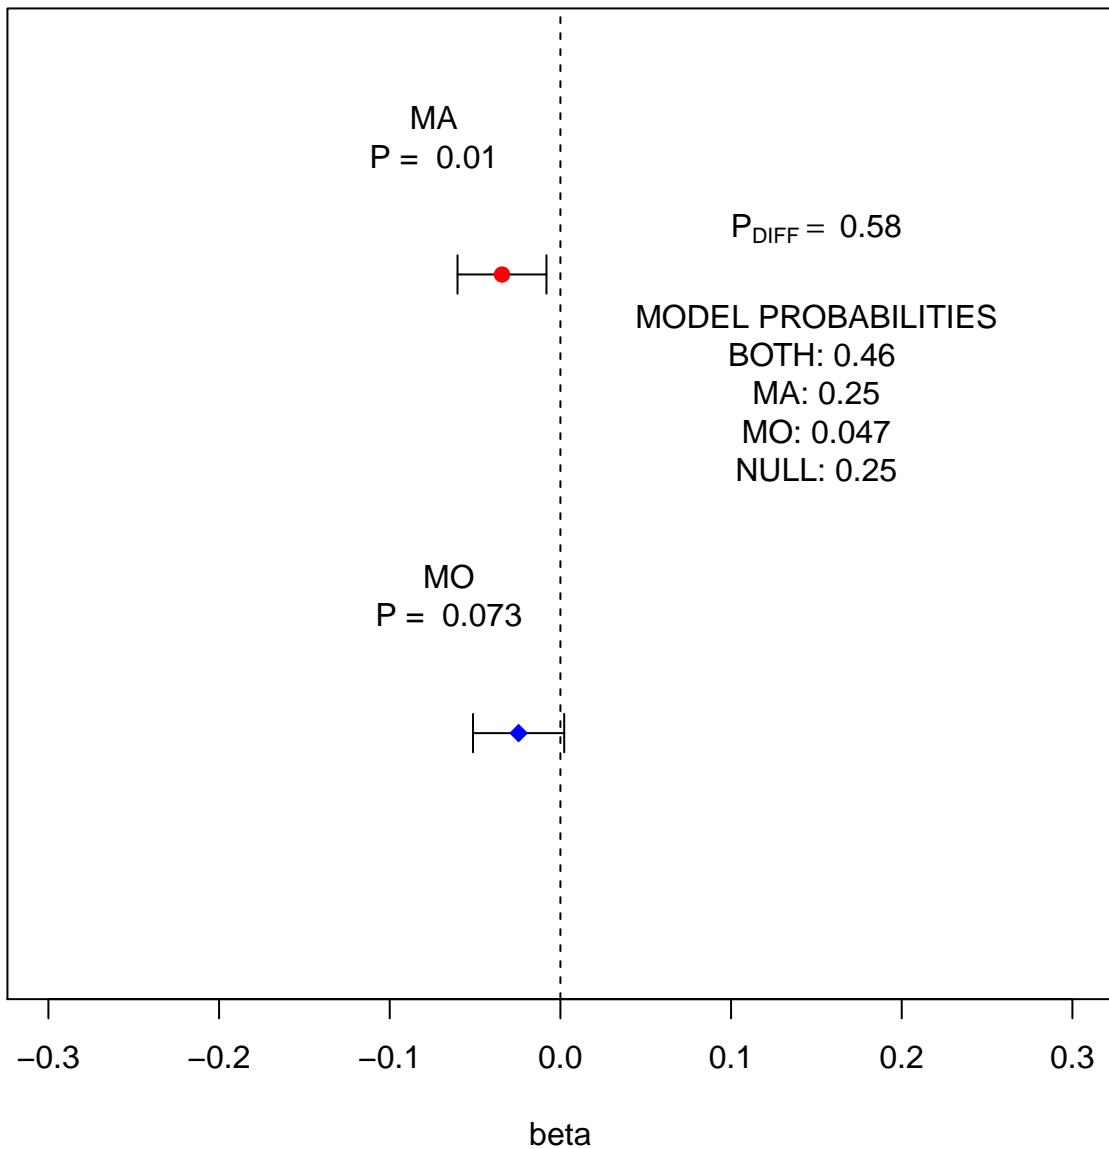

# TMEM51 (rs12057629)

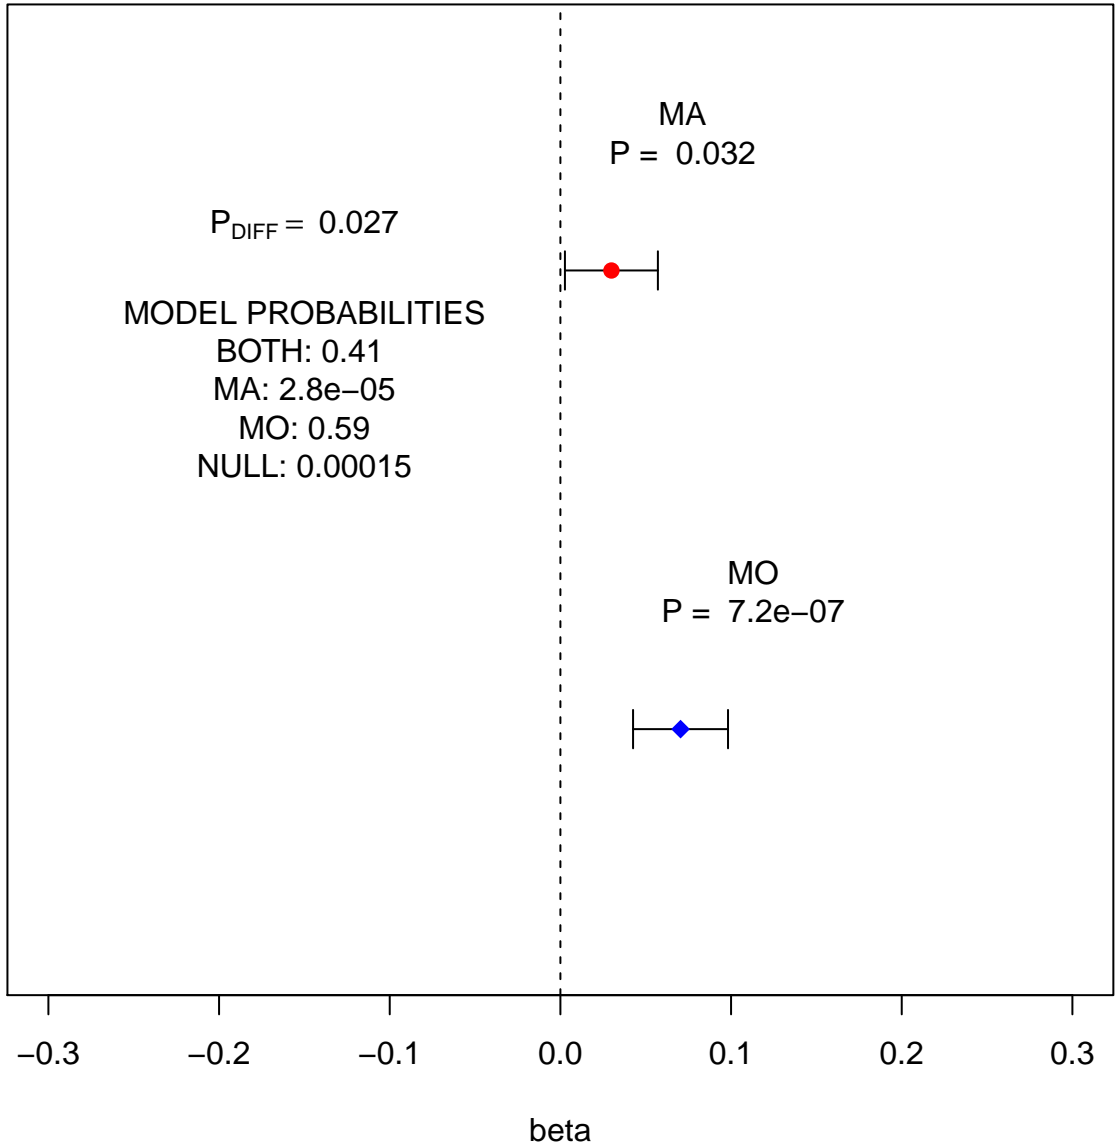

# INPP5B (rs28739509)

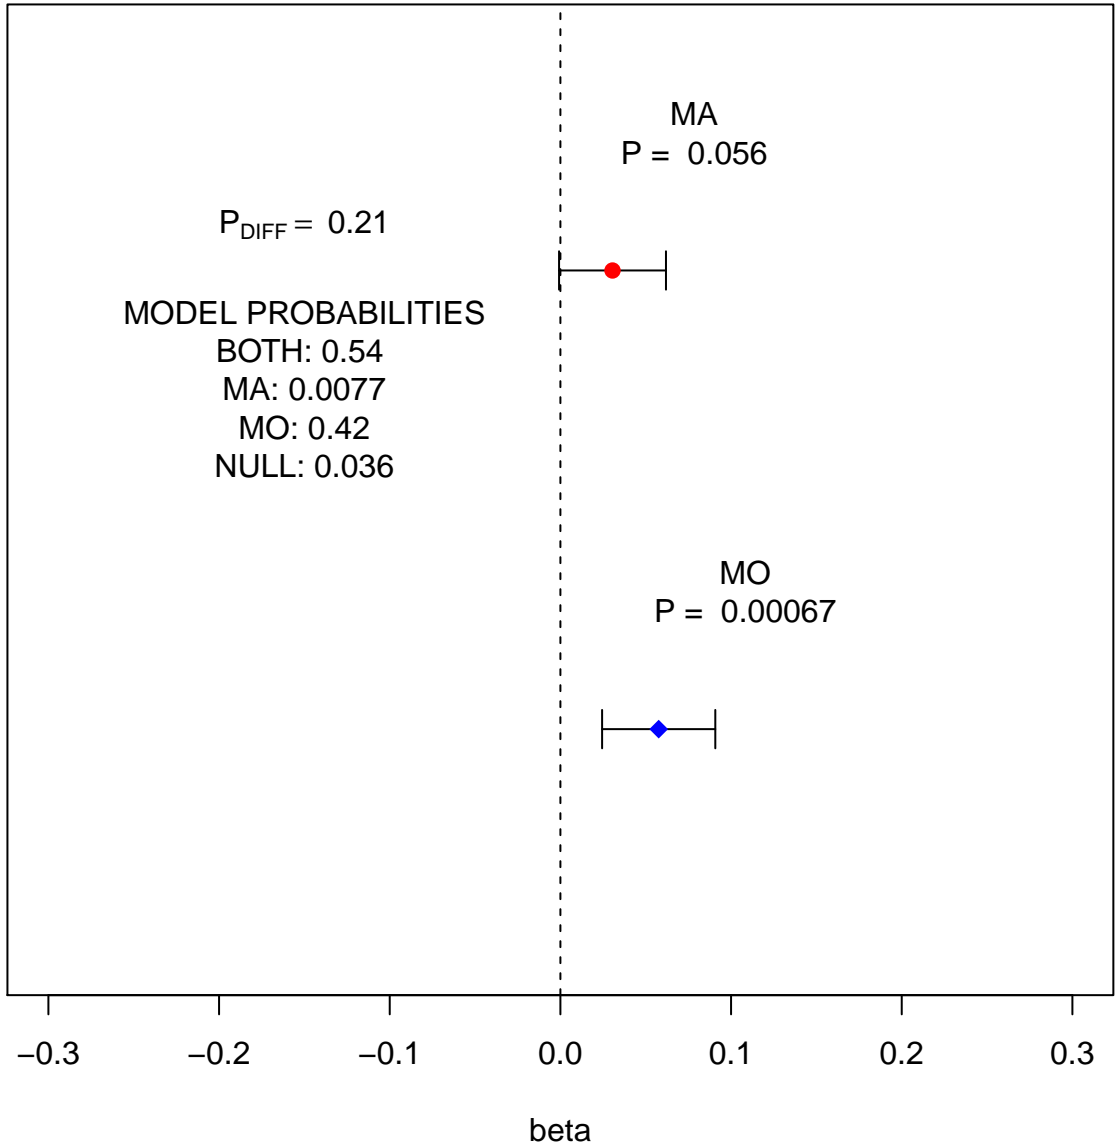

# MACF1 (rs1472662)

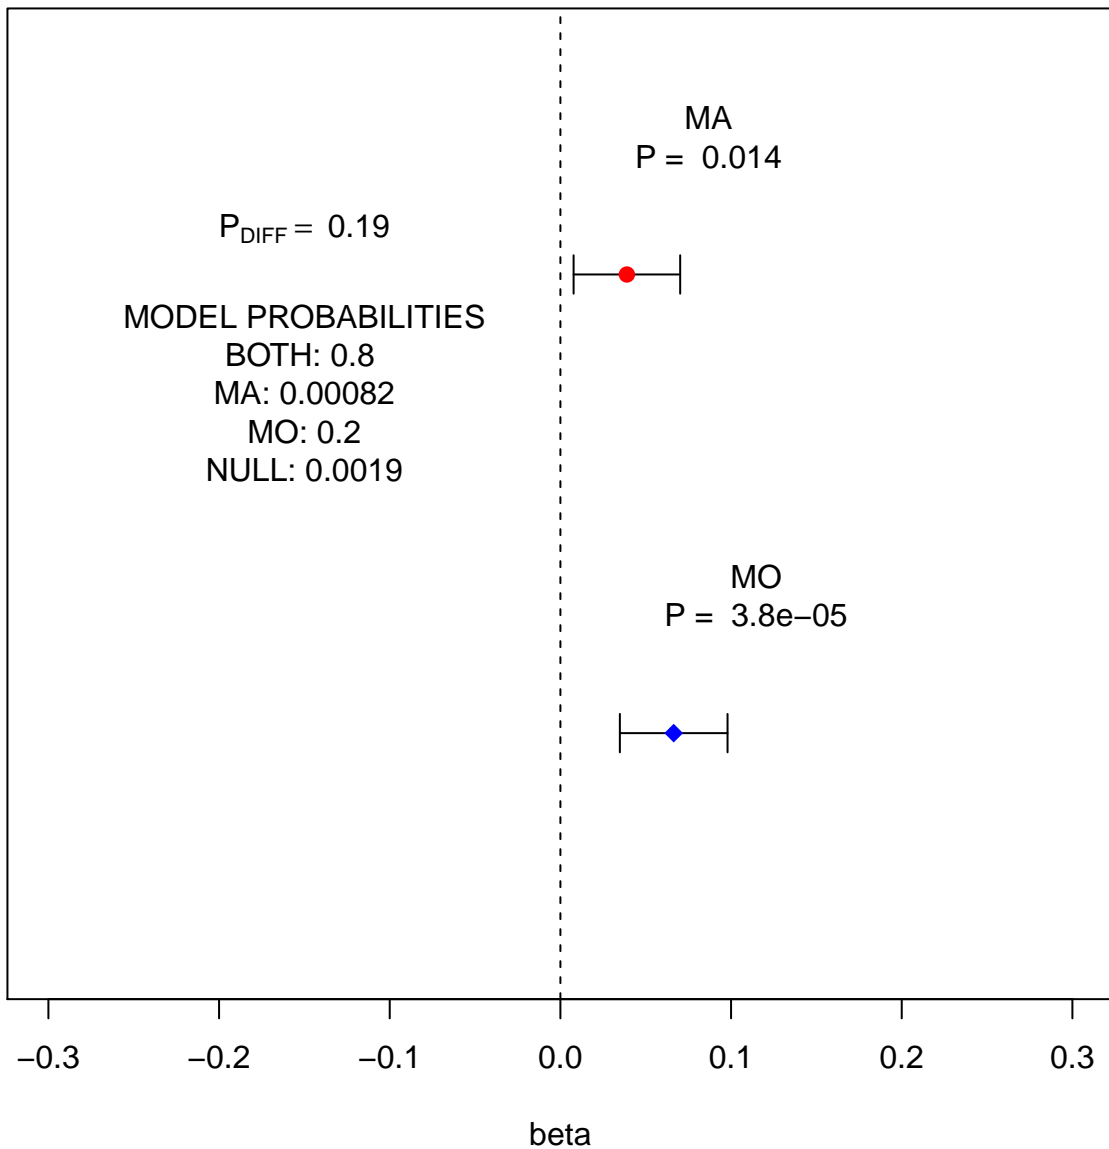

# C1orf87 (rs11578492)

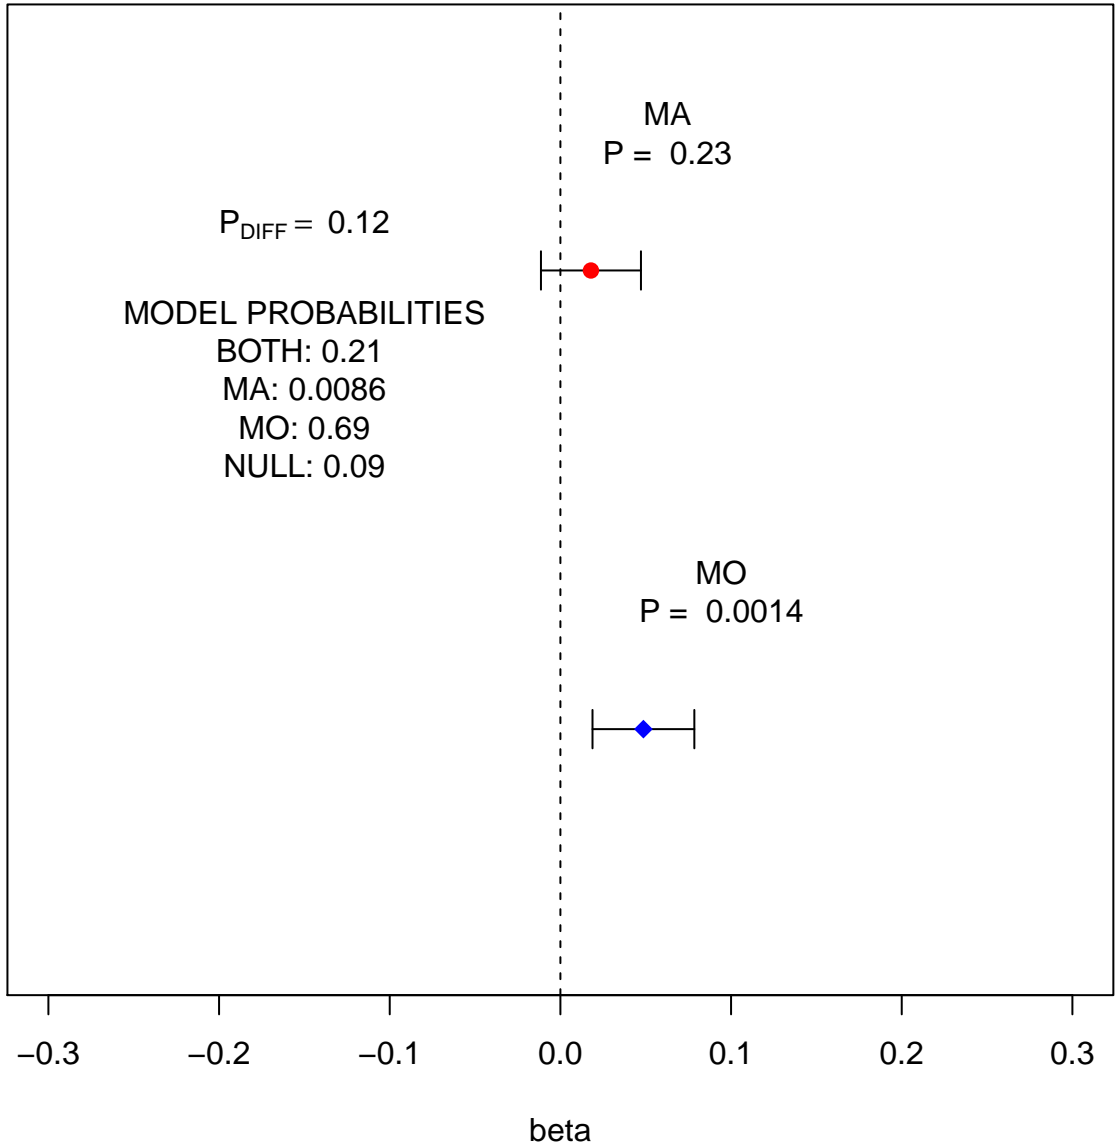

# near LEPR (rs7511672)

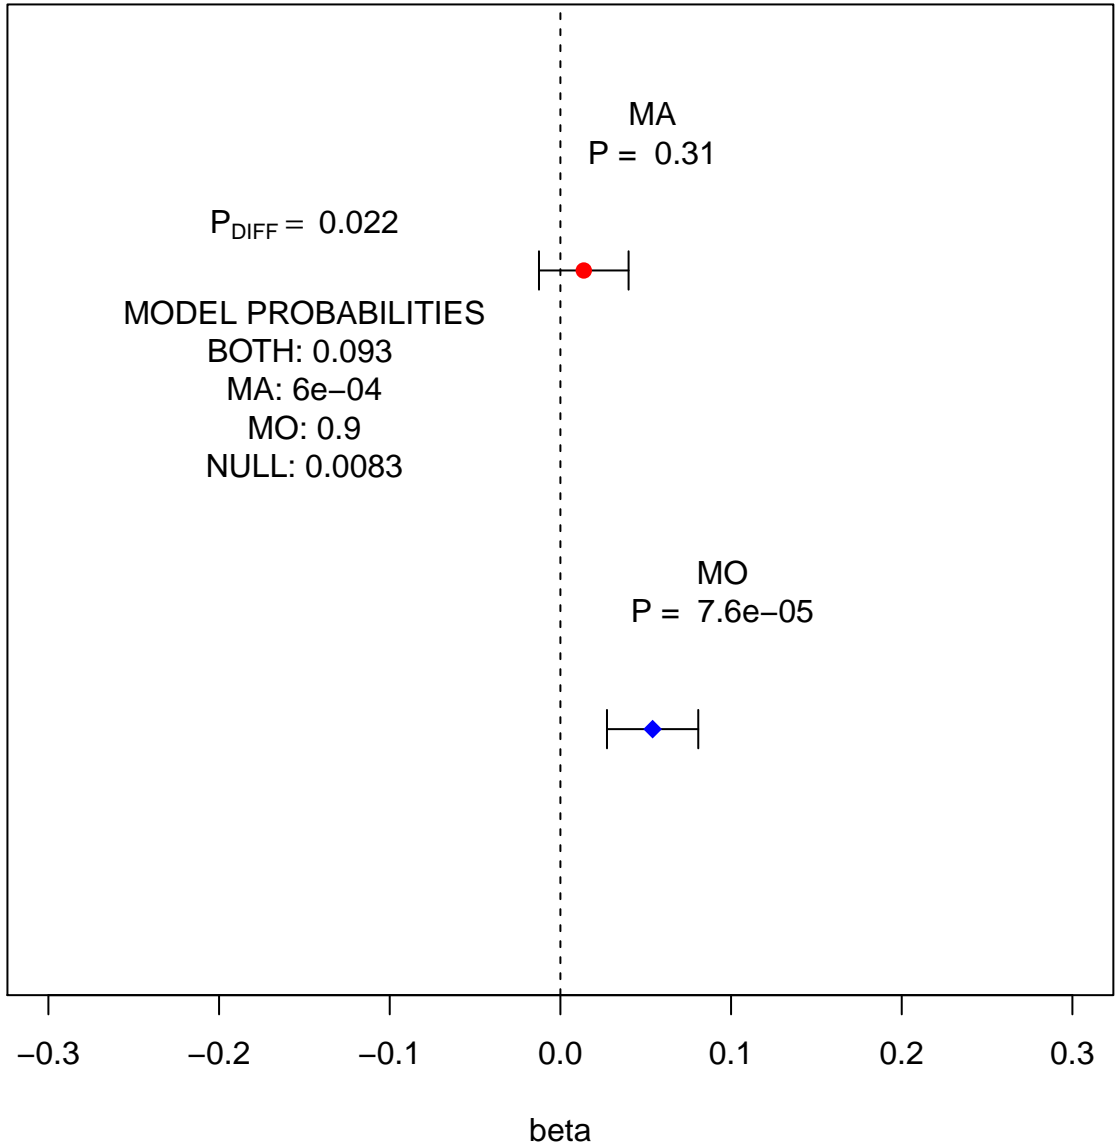

near RP4-598G3.1 (rs56019088)

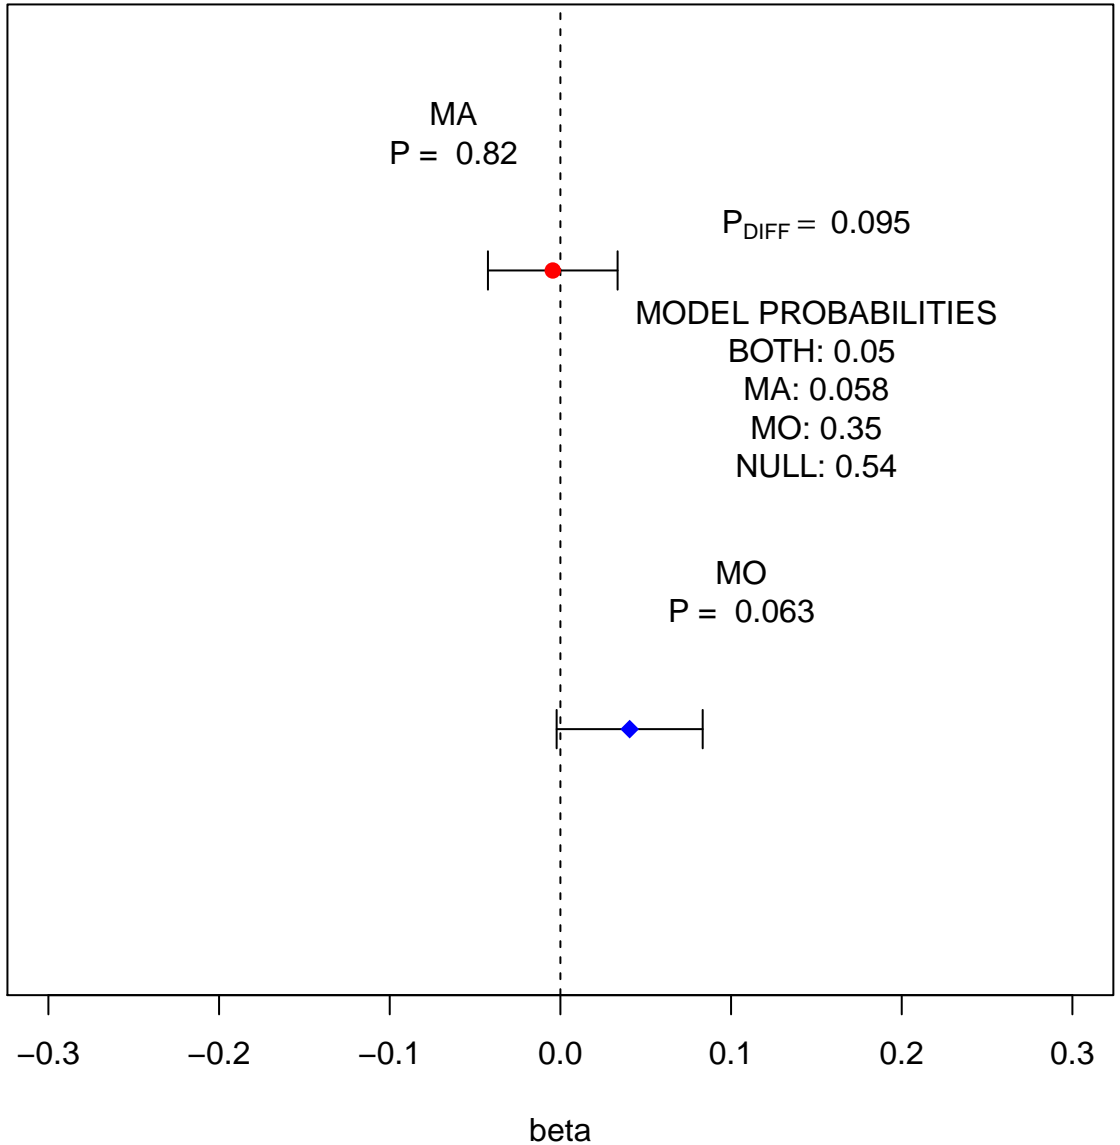



# TGFBR3 (rs11165300)

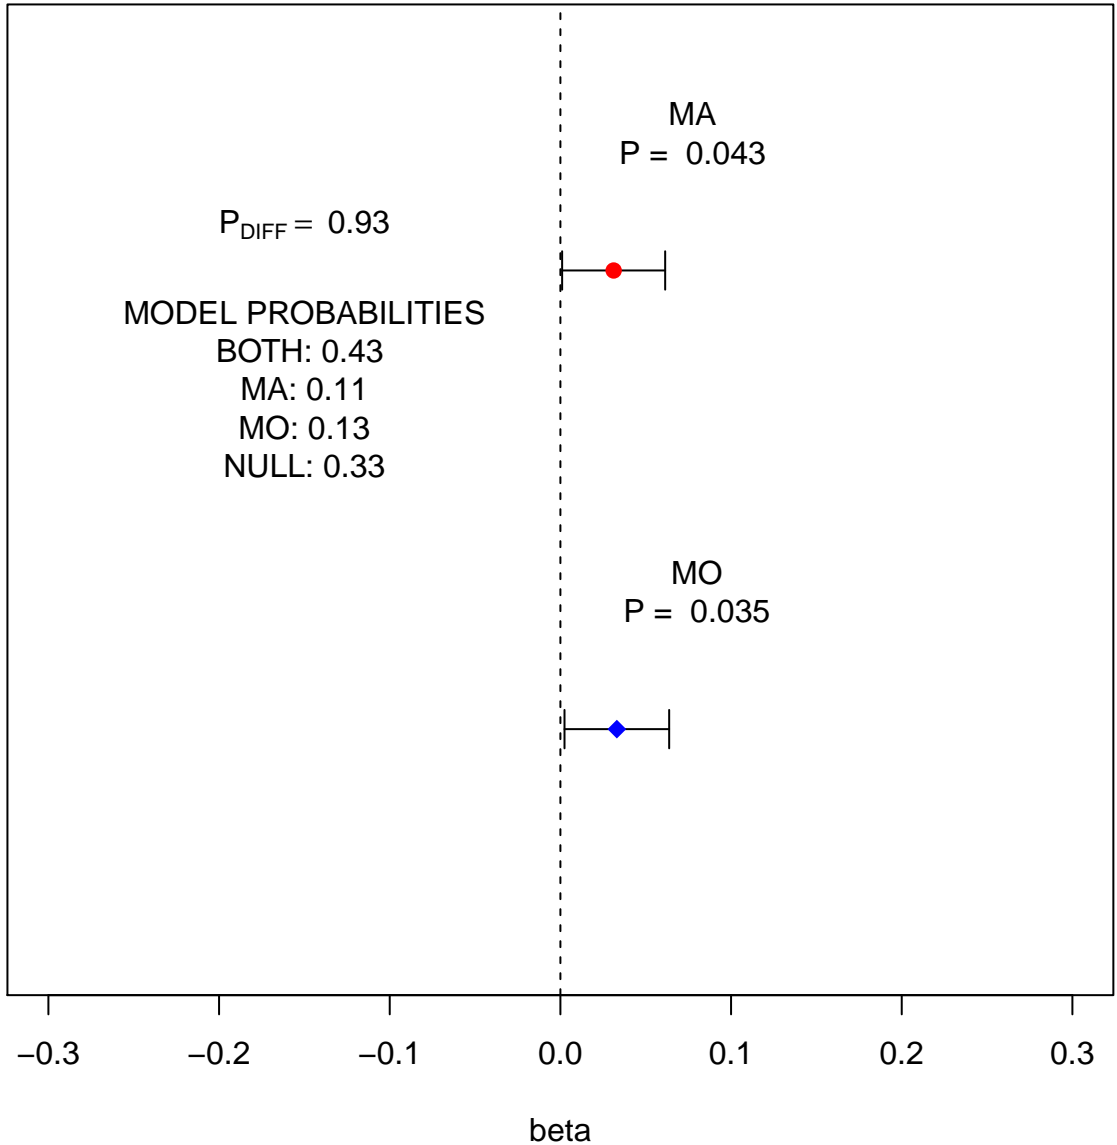

# near TSPAN2 (rs2078371)

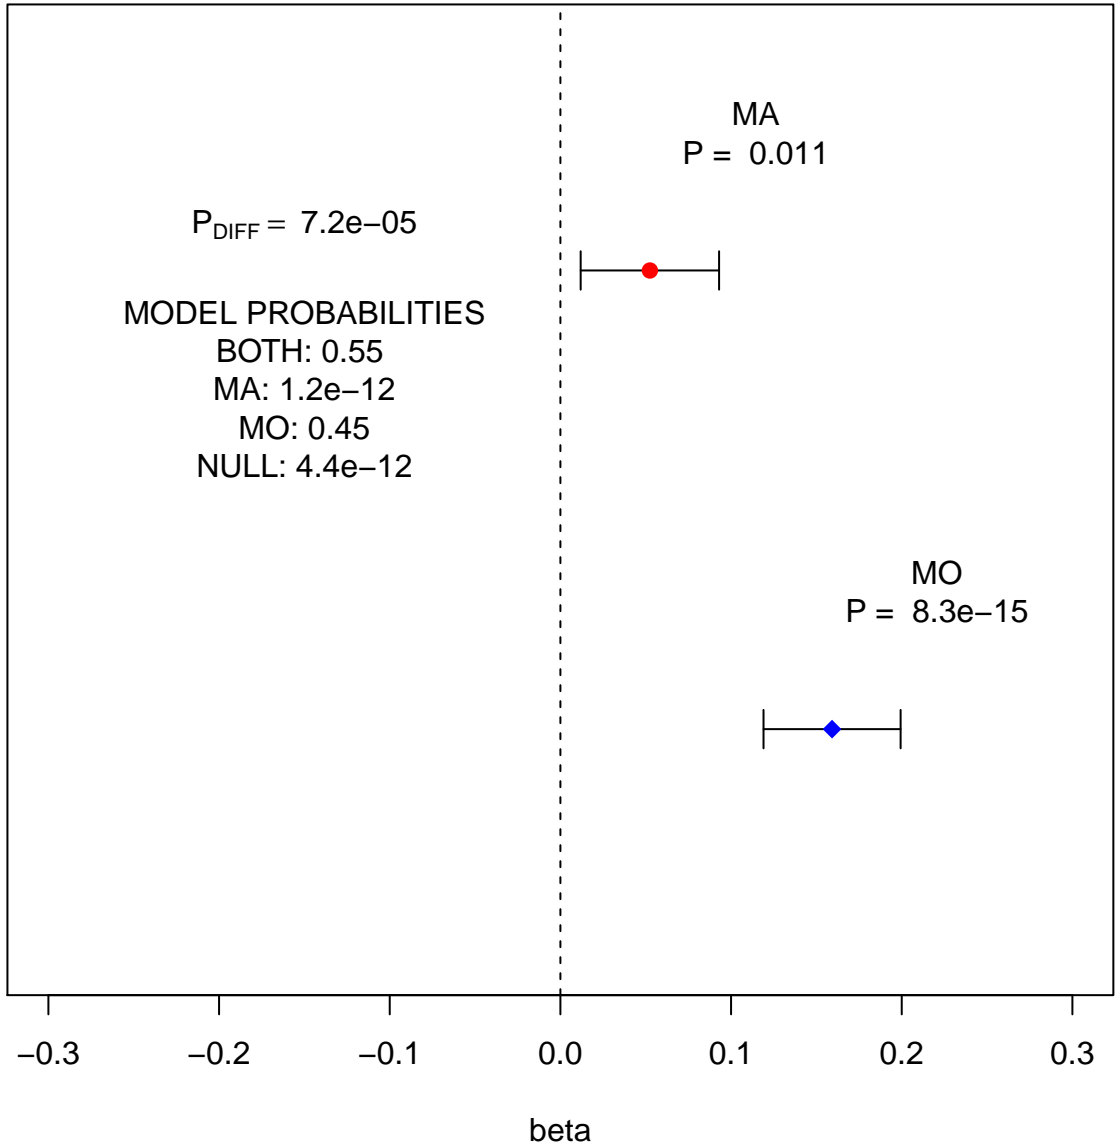

# near ADAMTSL4 (rs6693567)

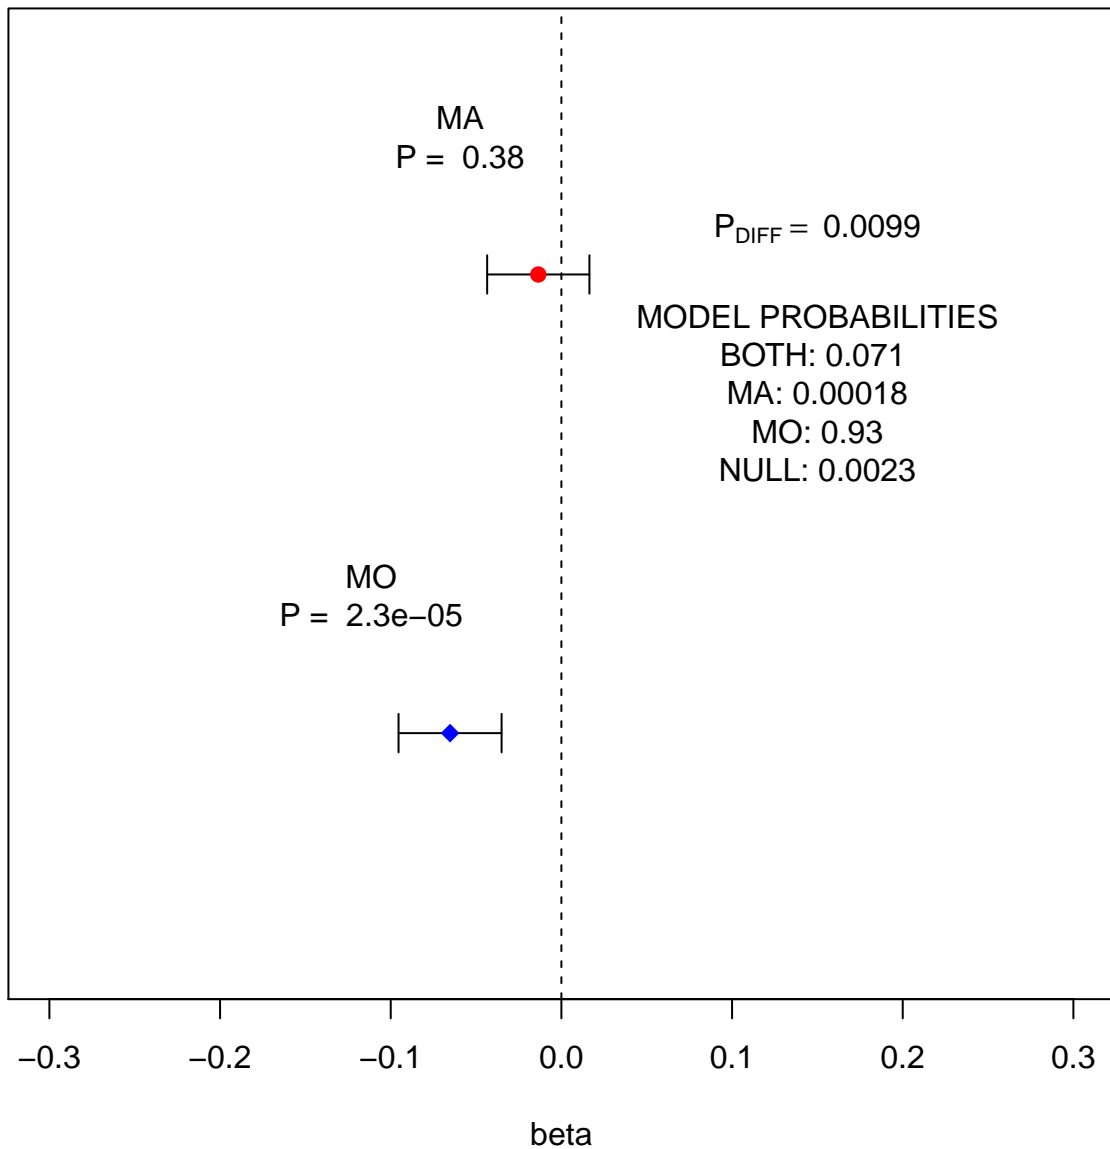

# MEF2D (rs2274319)

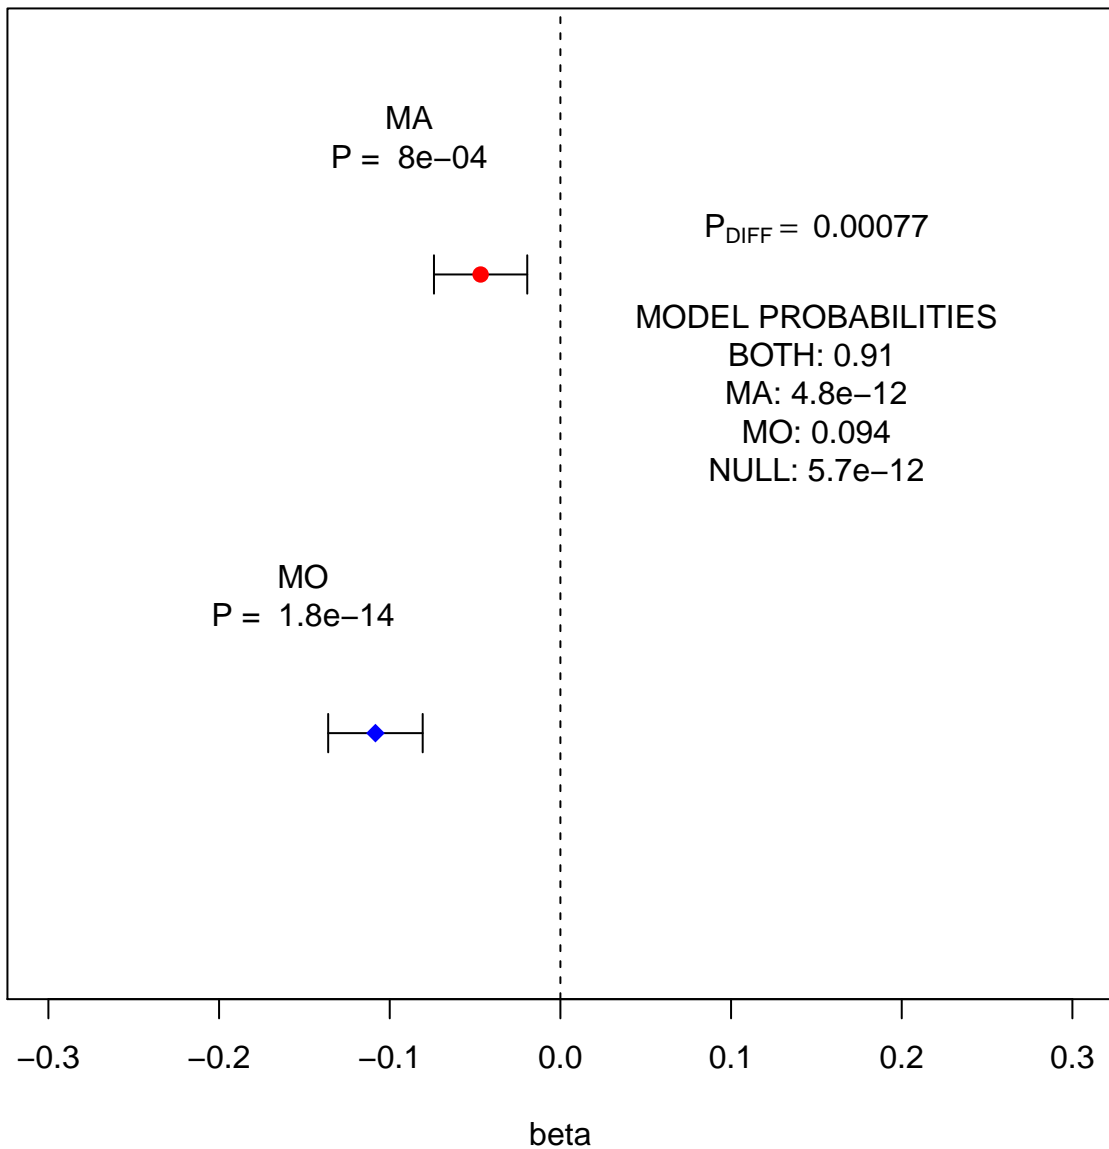

# RABGAP1L (rs11487328)

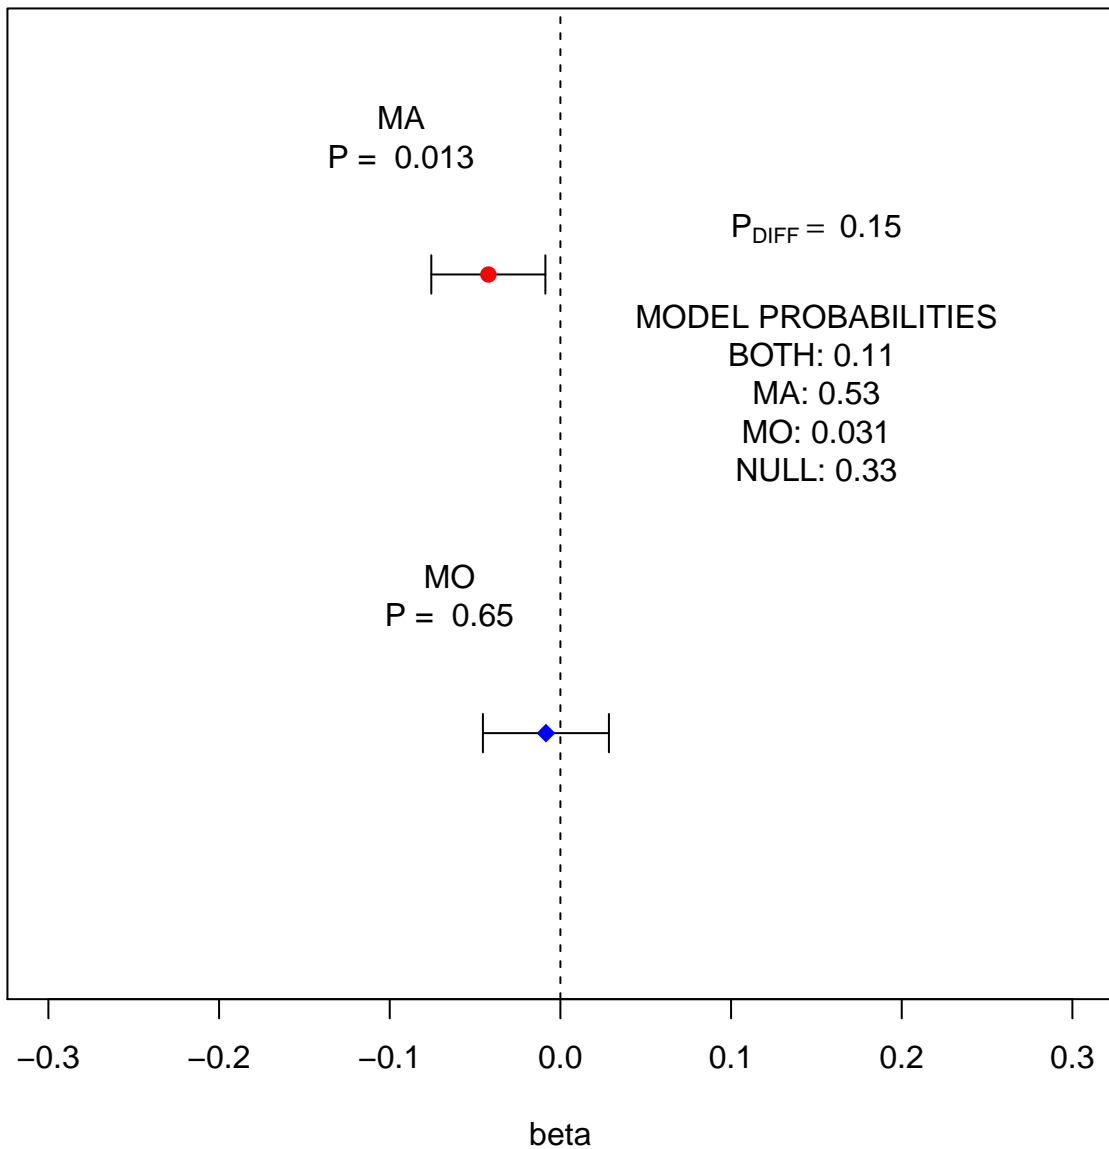

# PLA2G4A (rs6668908)

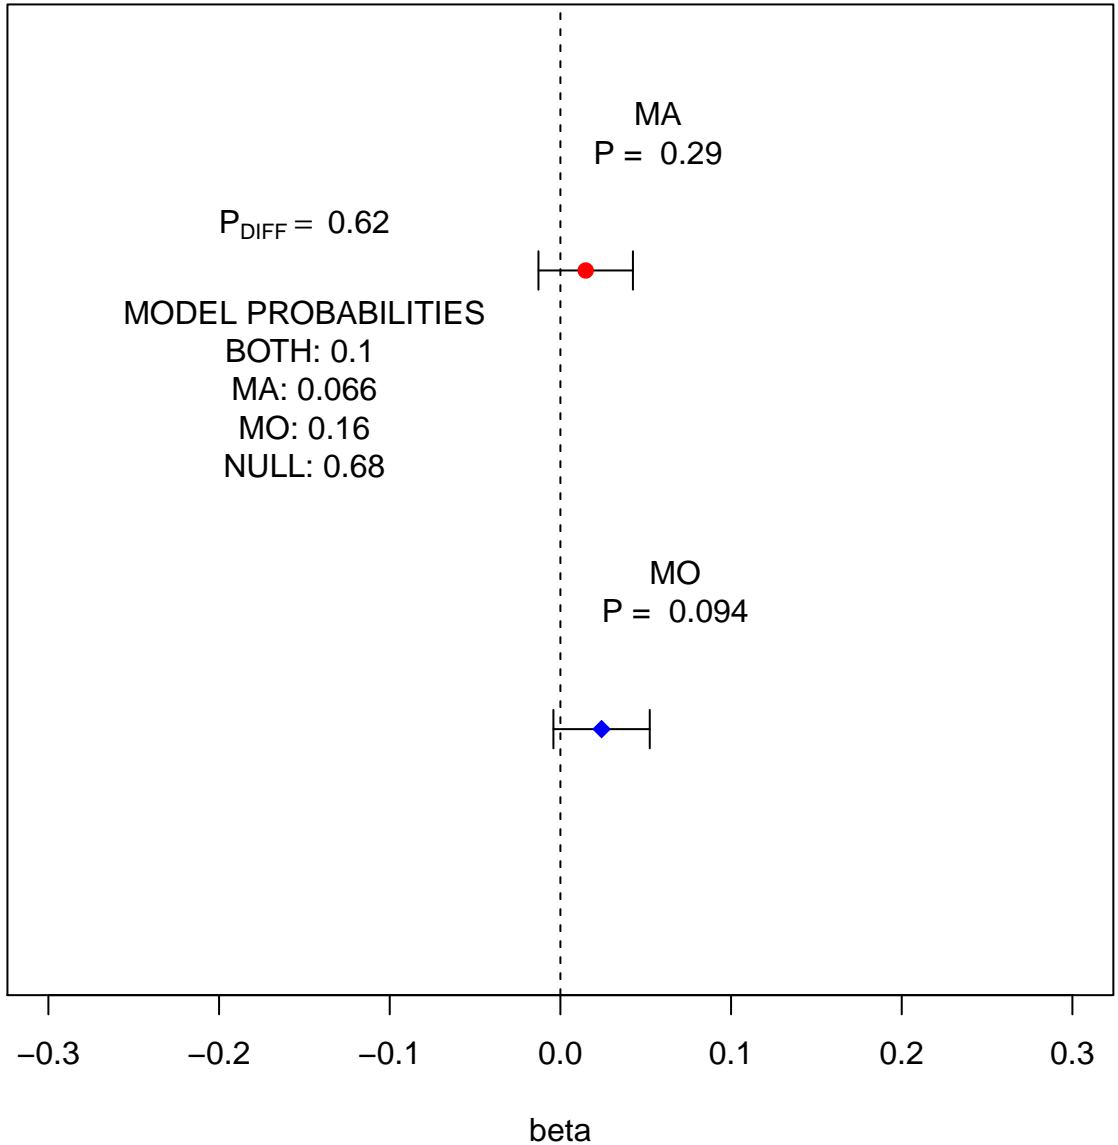

# near MAPKAPK2 (rs56140113)

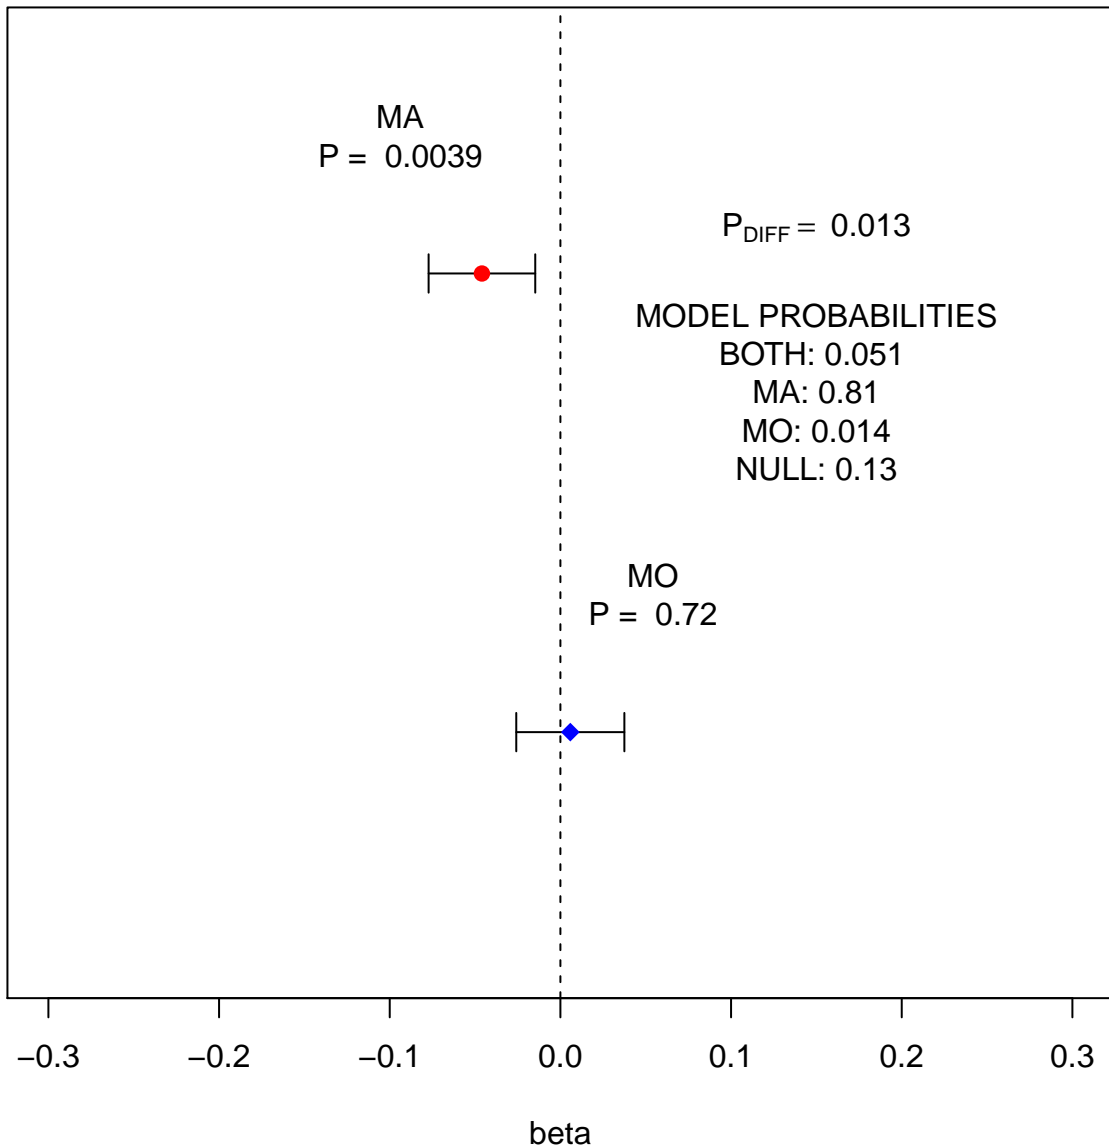

# KIF26B (rs72764846)

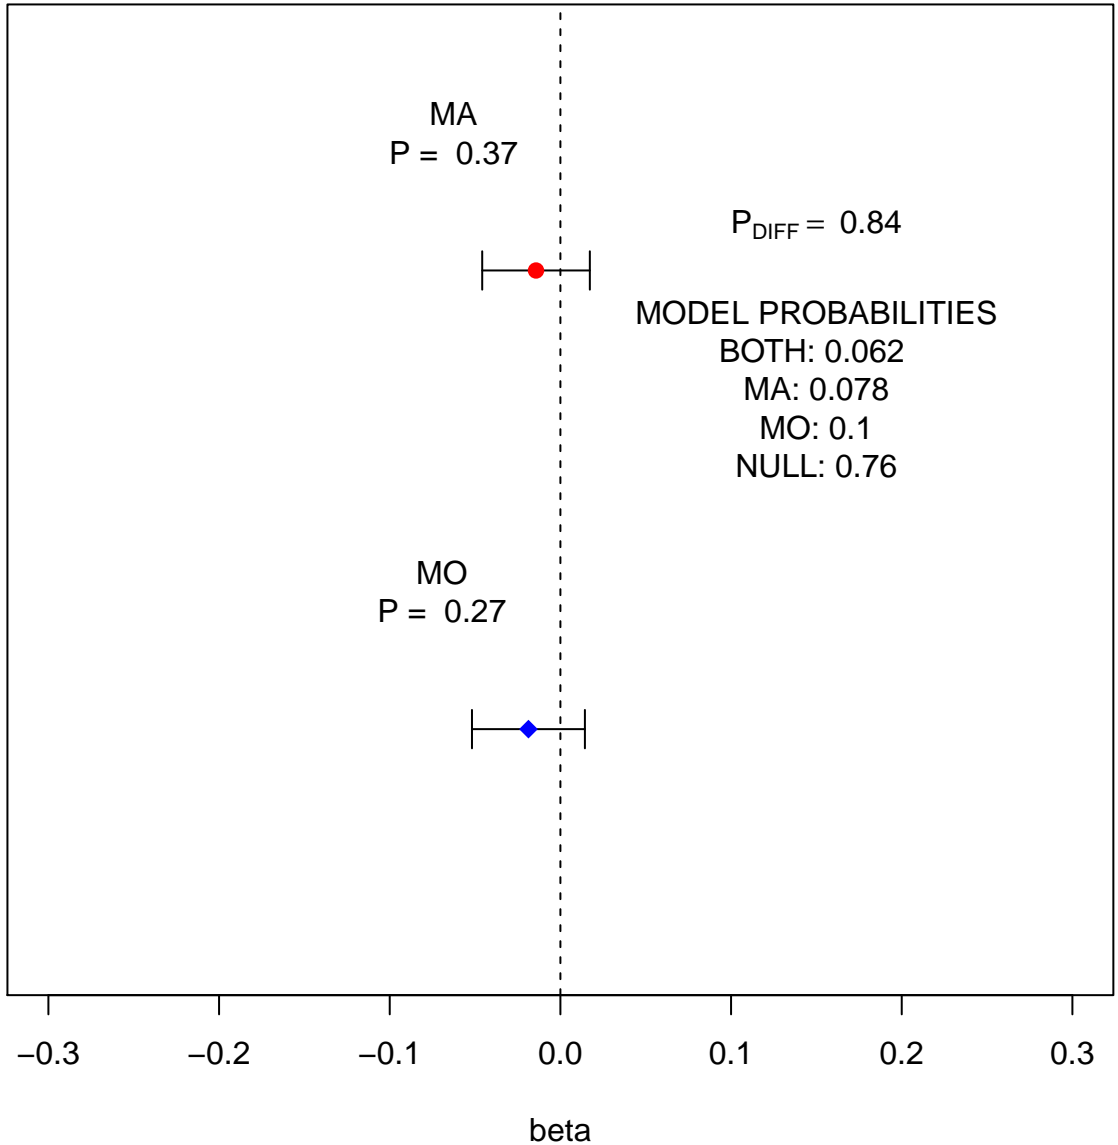



# THADA (rs12712881)

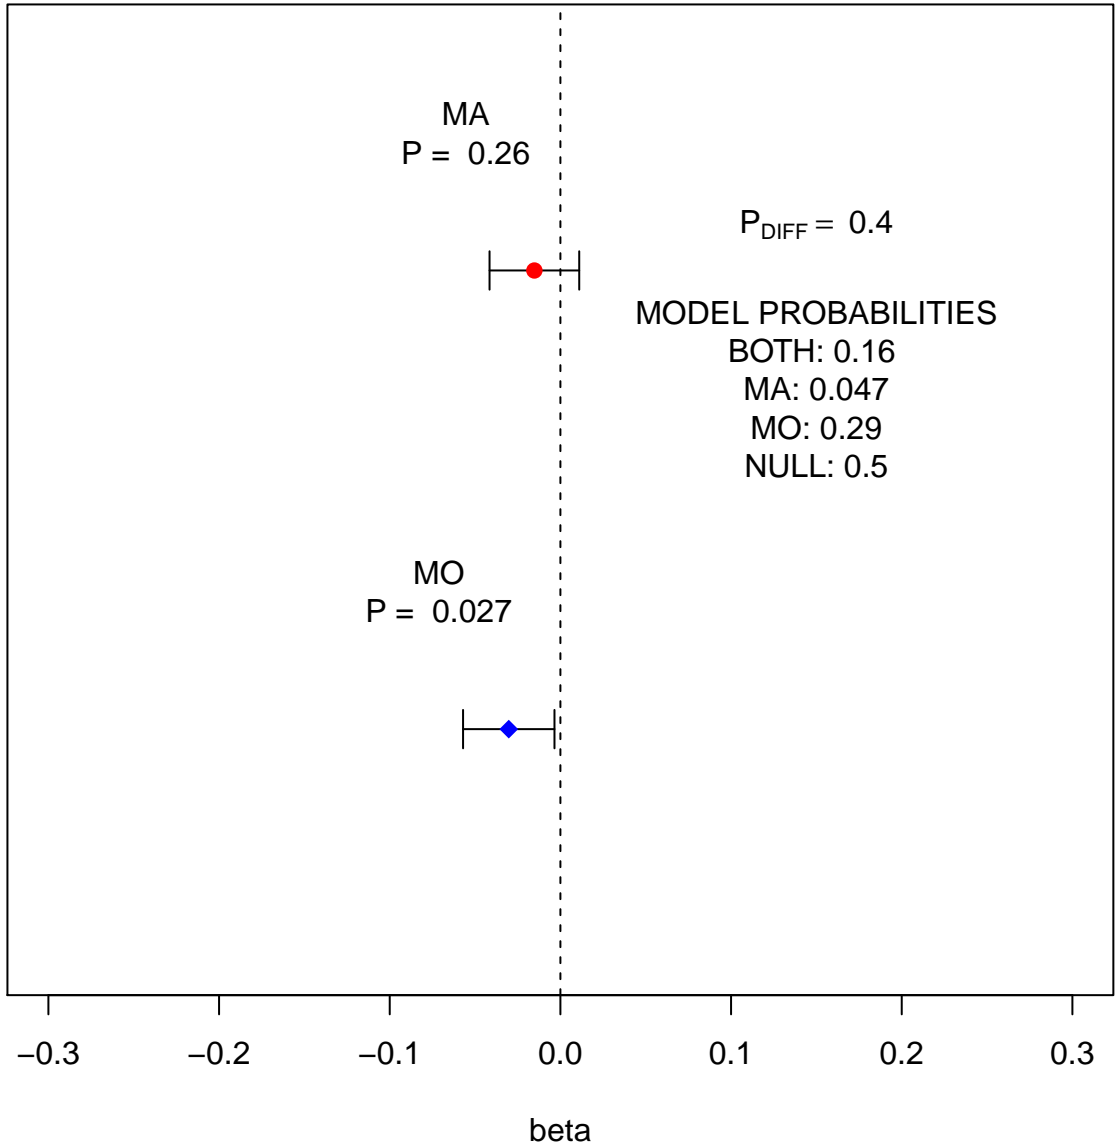

# ANKRD36C (rs4907224)

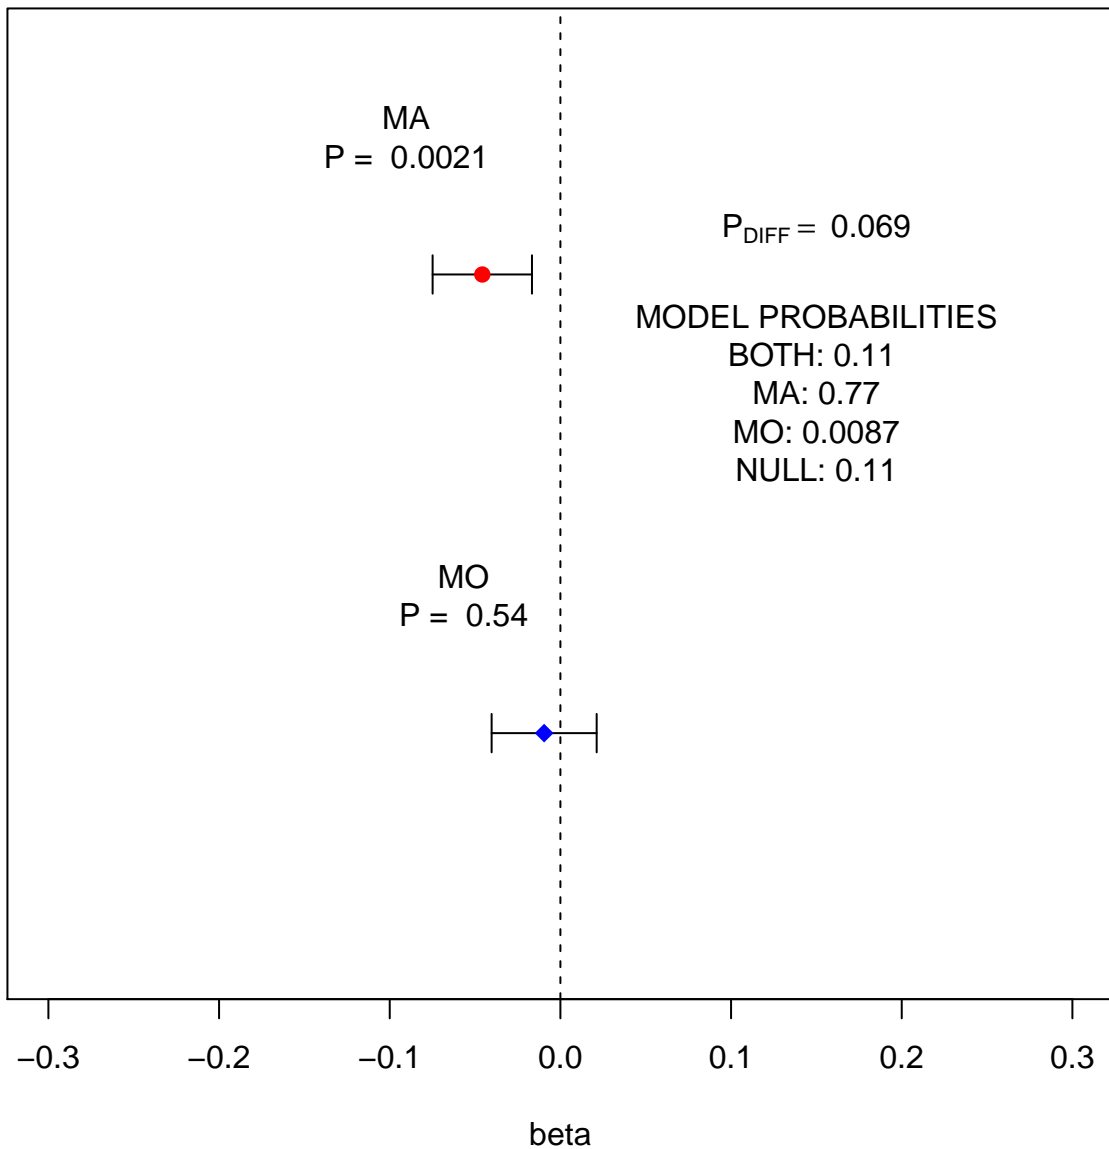

# ZEB2 (rs7564469)

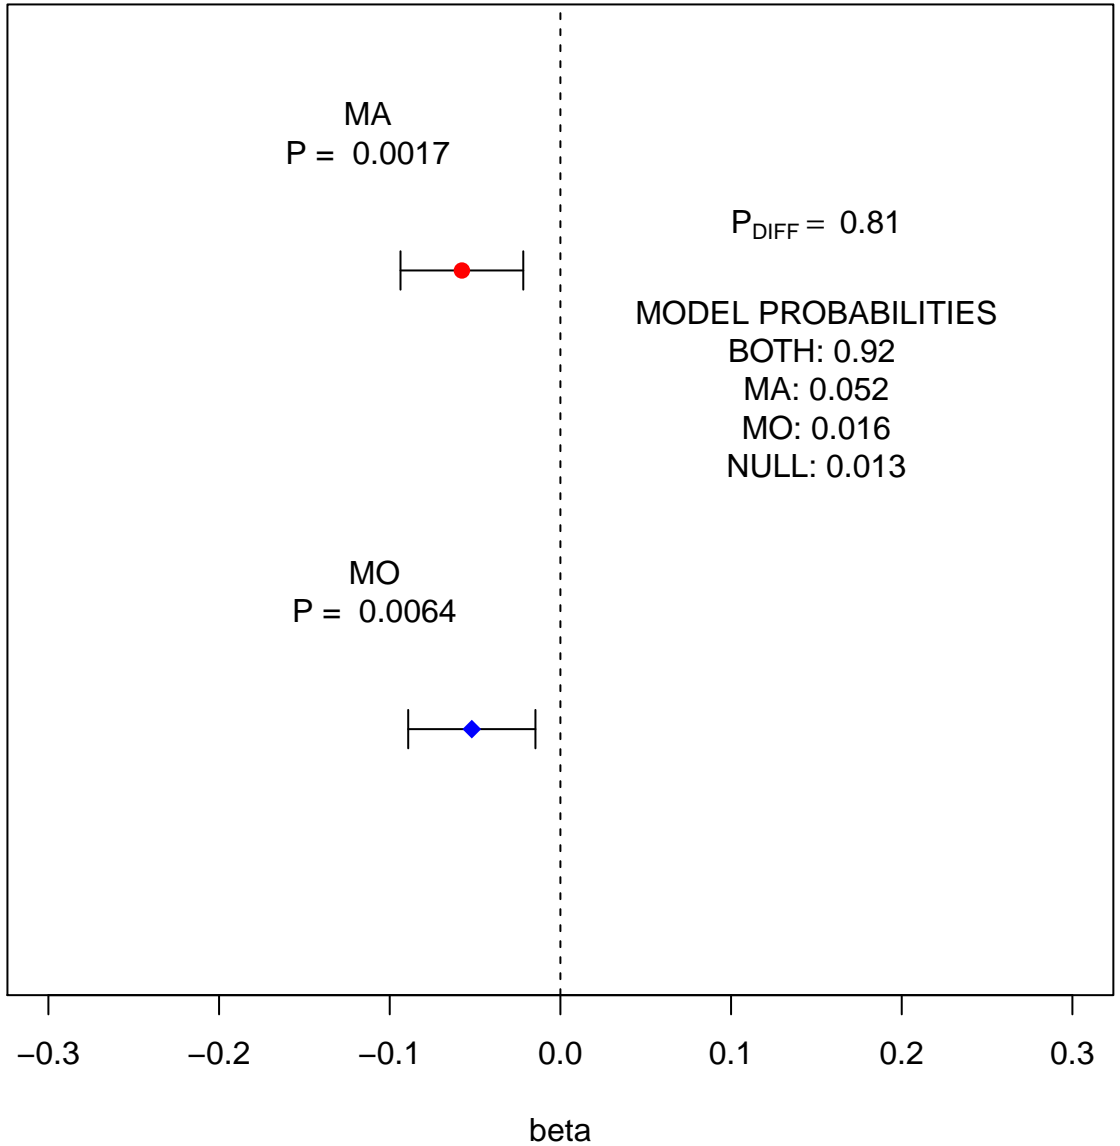

near AC064865.1 (rs895219)

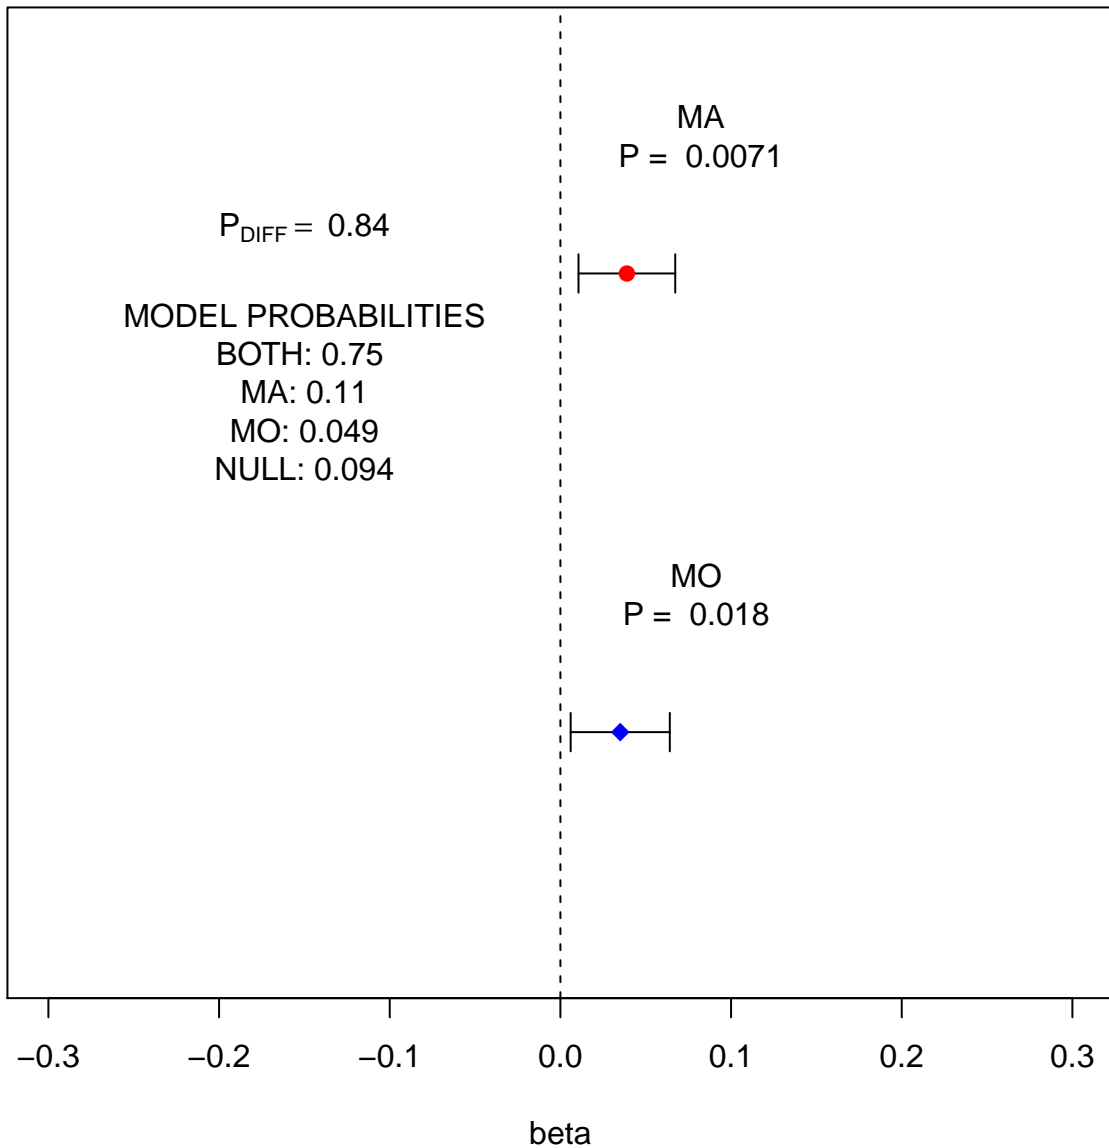

# near RNU6-546P (rs843215)

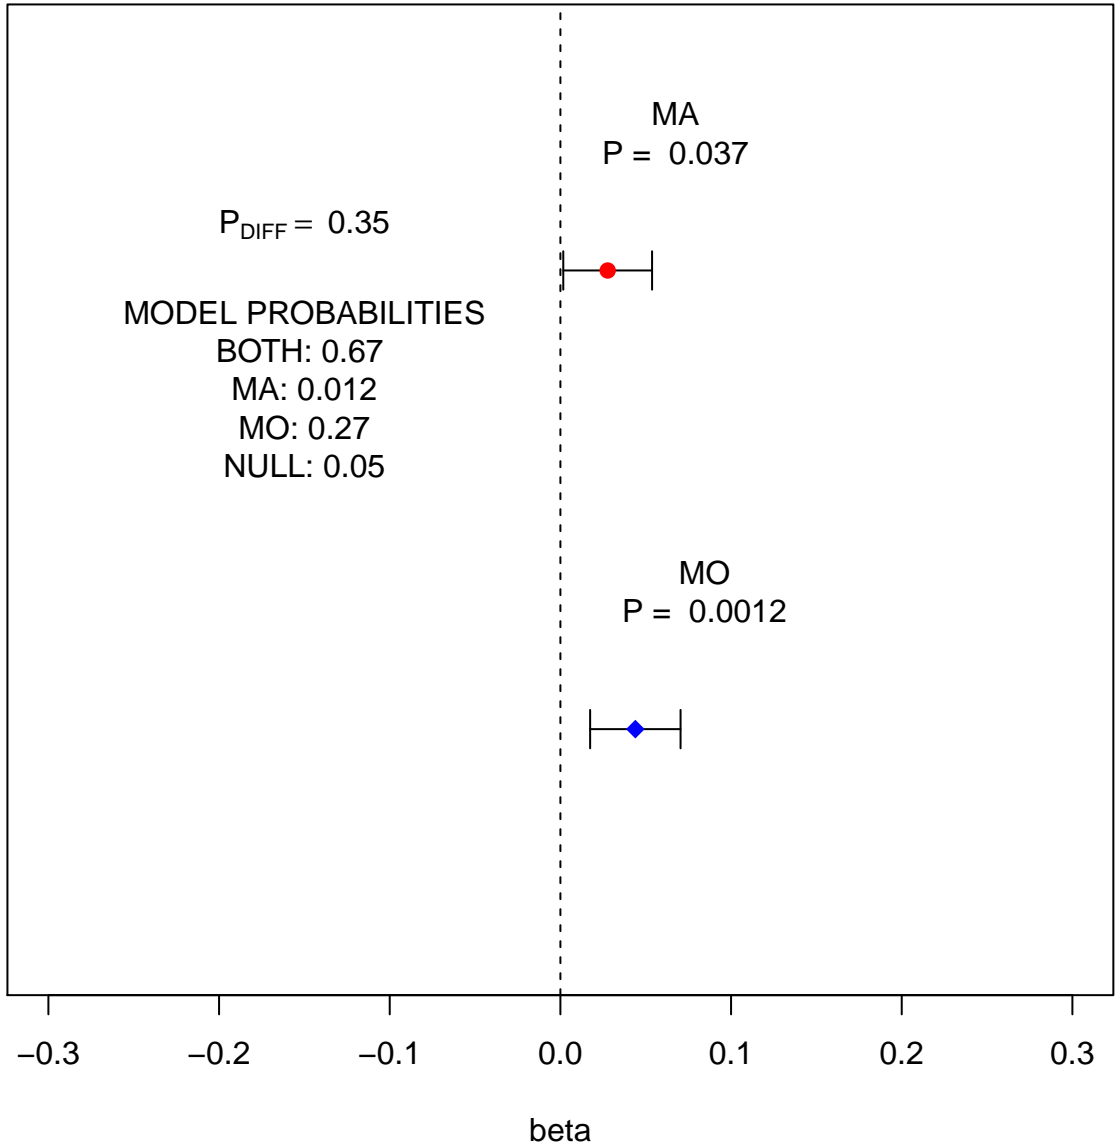

# MYO3B (rs4668251)

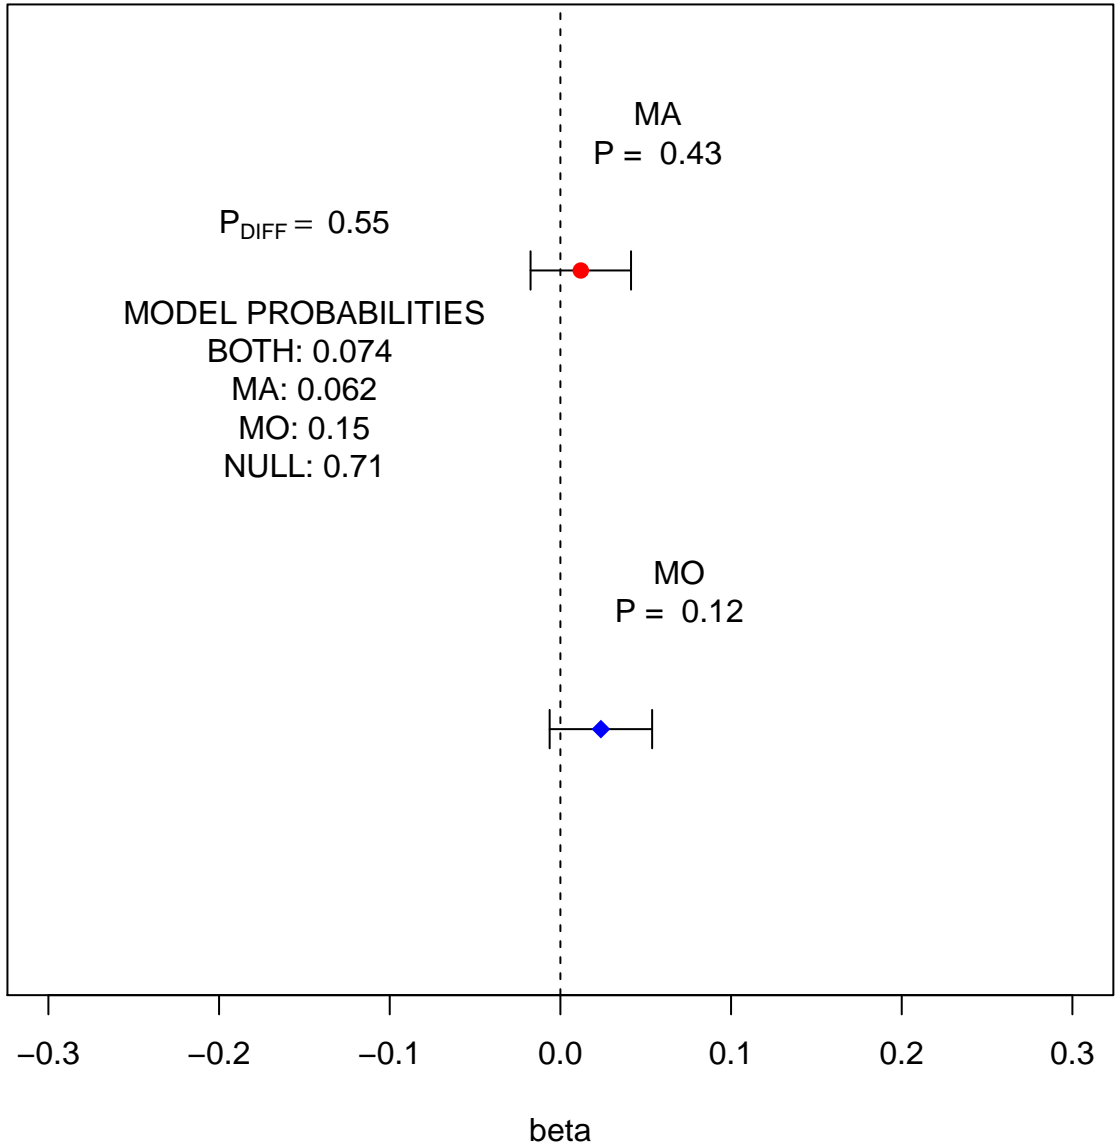

# near HOXD10 (rs72923449)

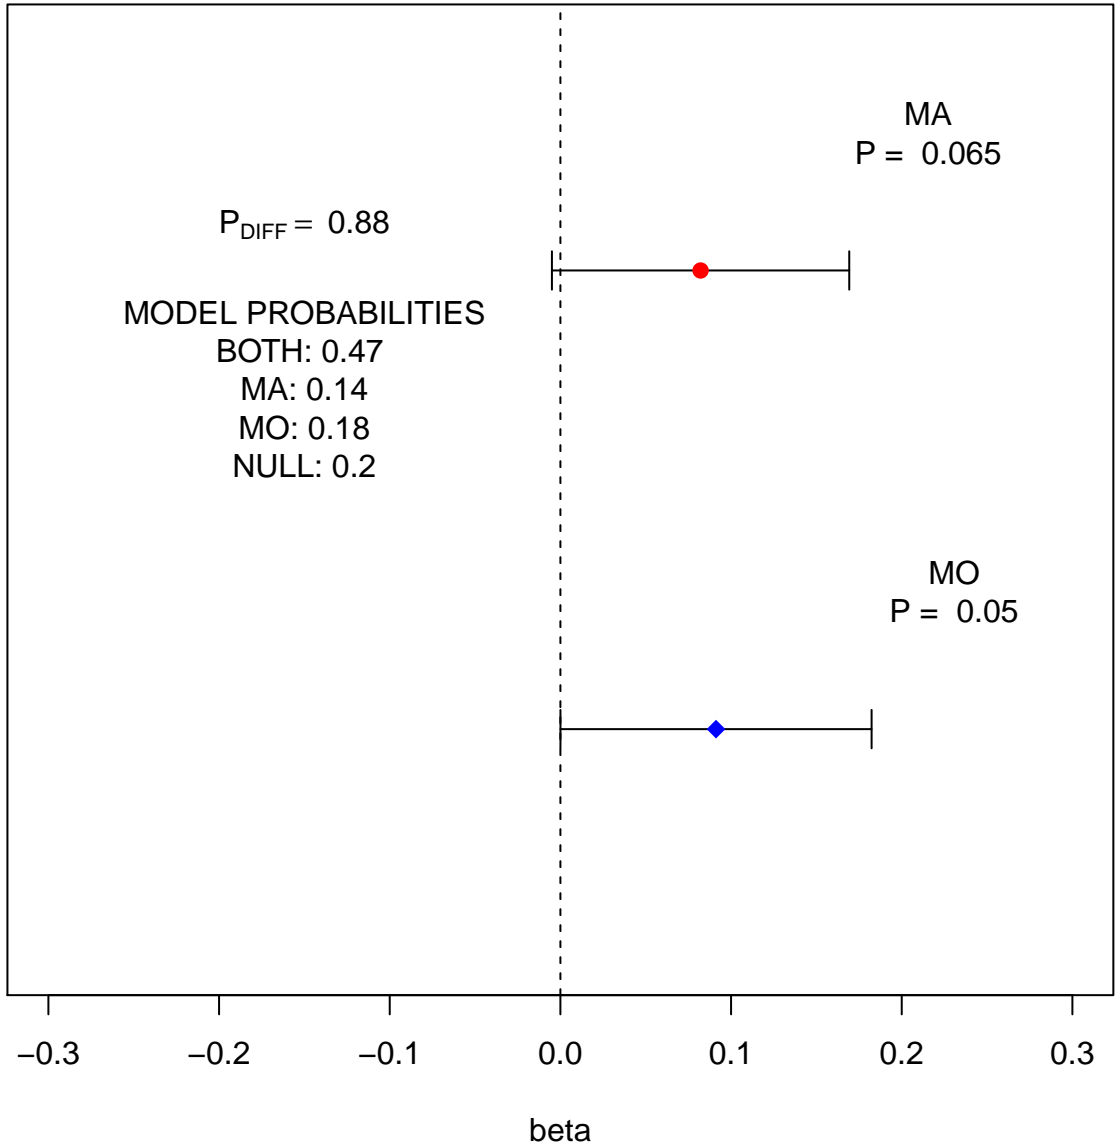

# CARF (rs138556413)

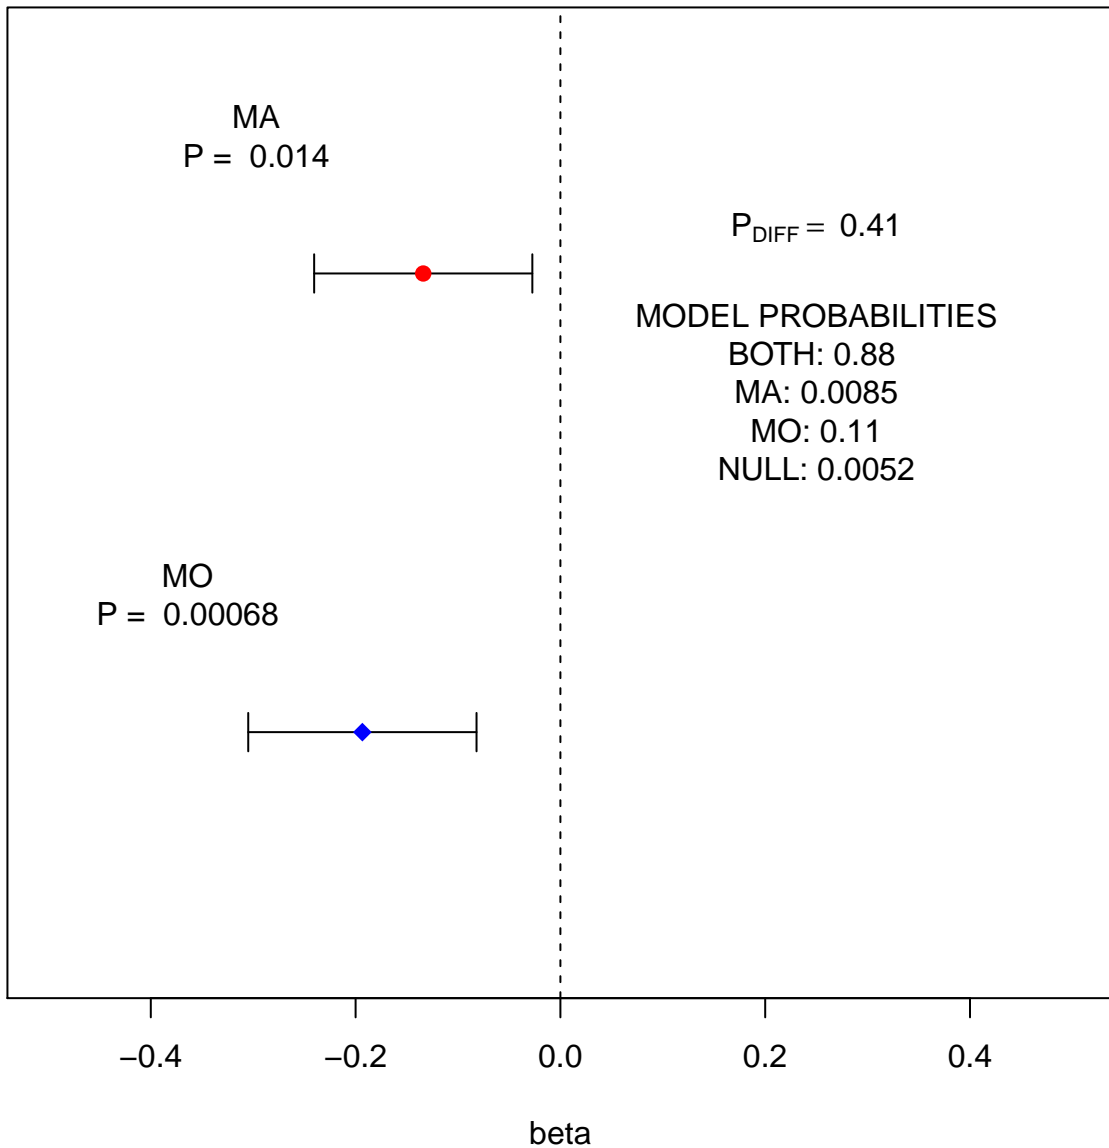



# near TRPM8 (rs10166942)

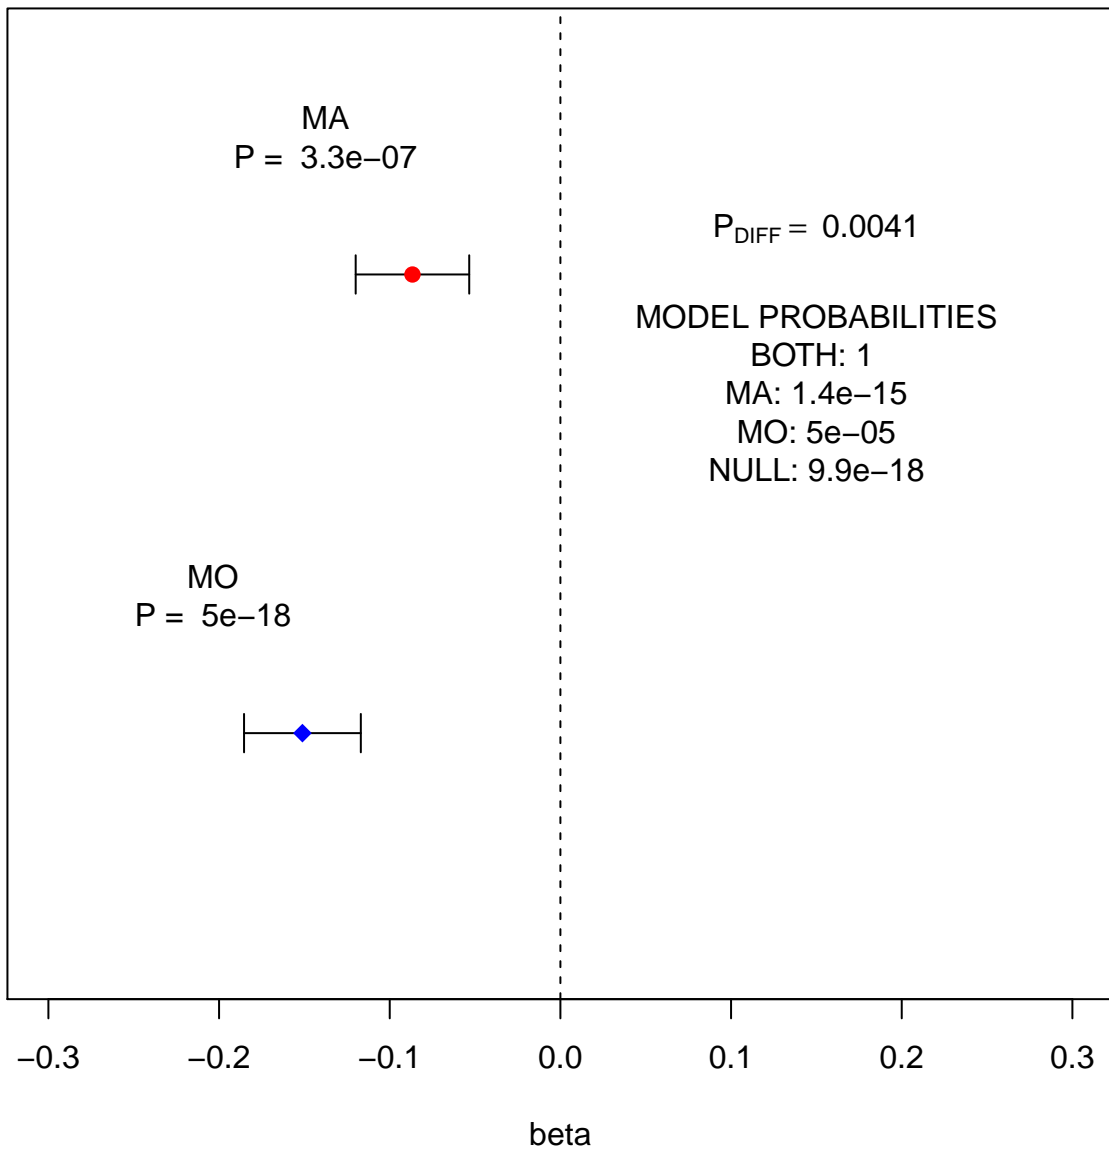

# near TGFBR2 (rs7371912)

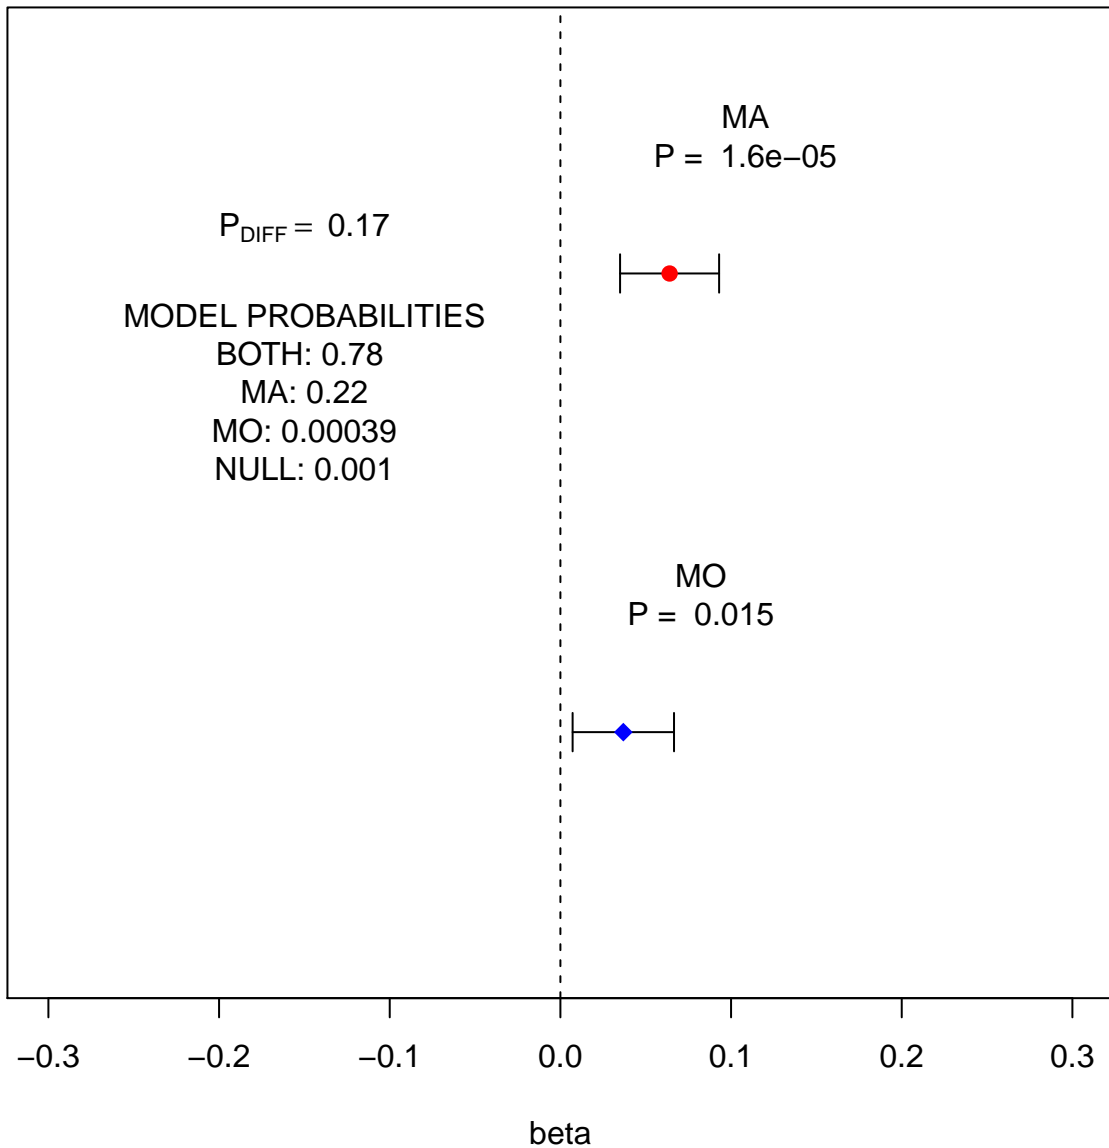

# ATRIP (rs7618883)

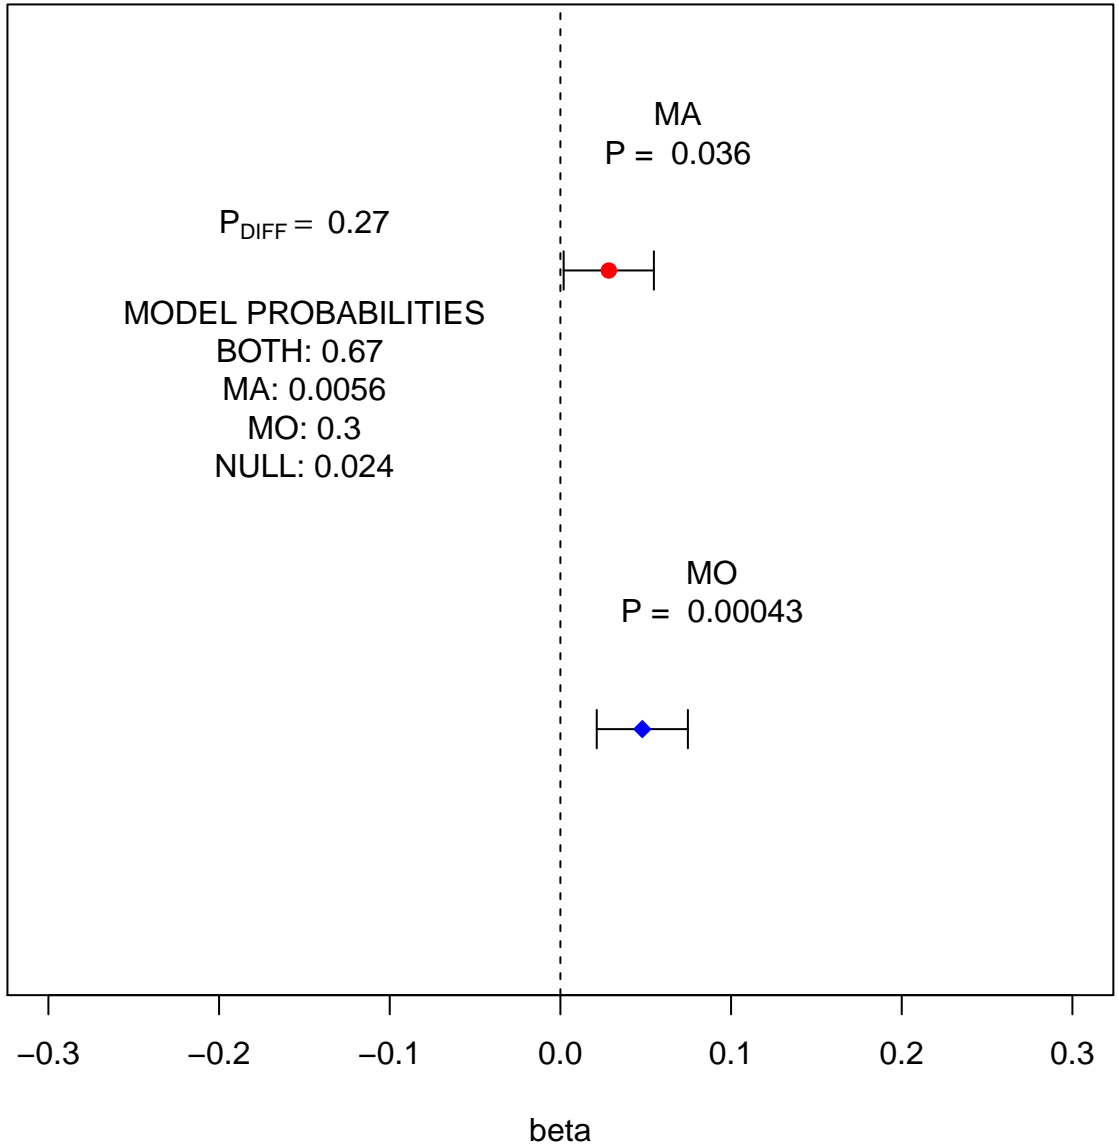

# near HNRNPA3P8 (rs950570)

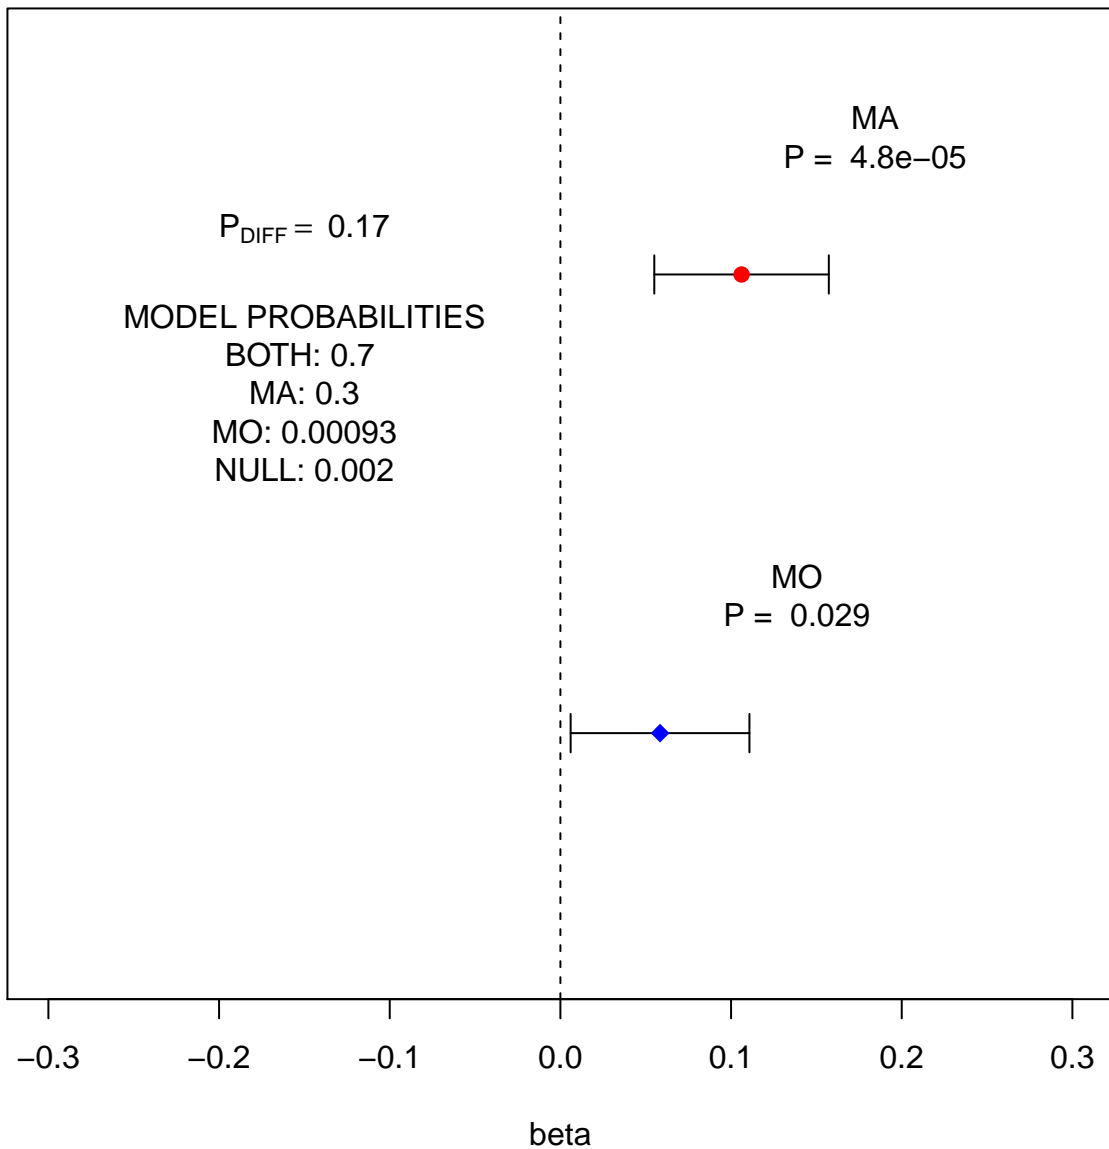

# near CADM2 (rs73138150)

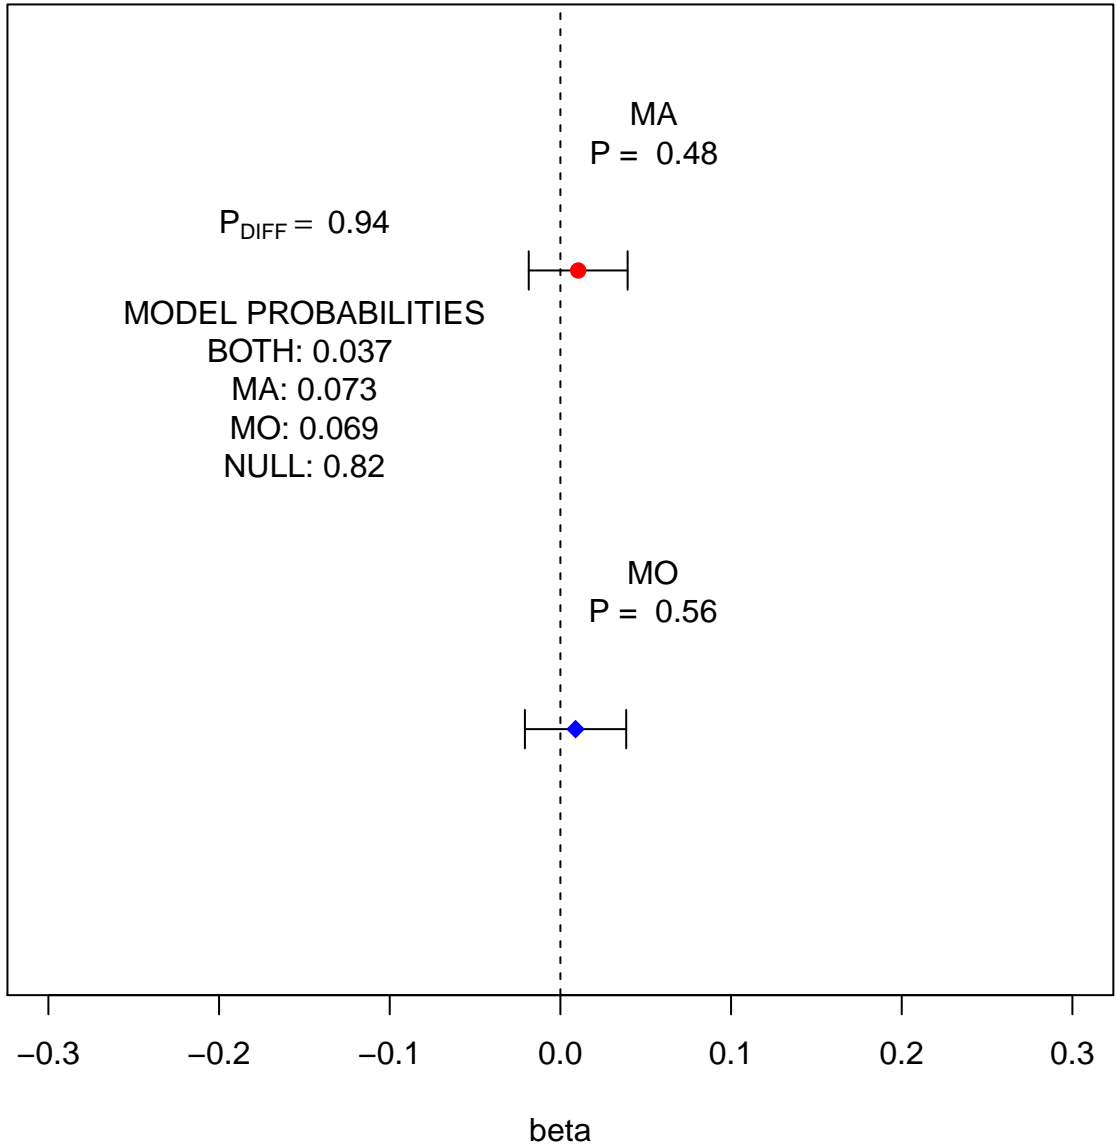

# near C3orf38 (rs6795209)

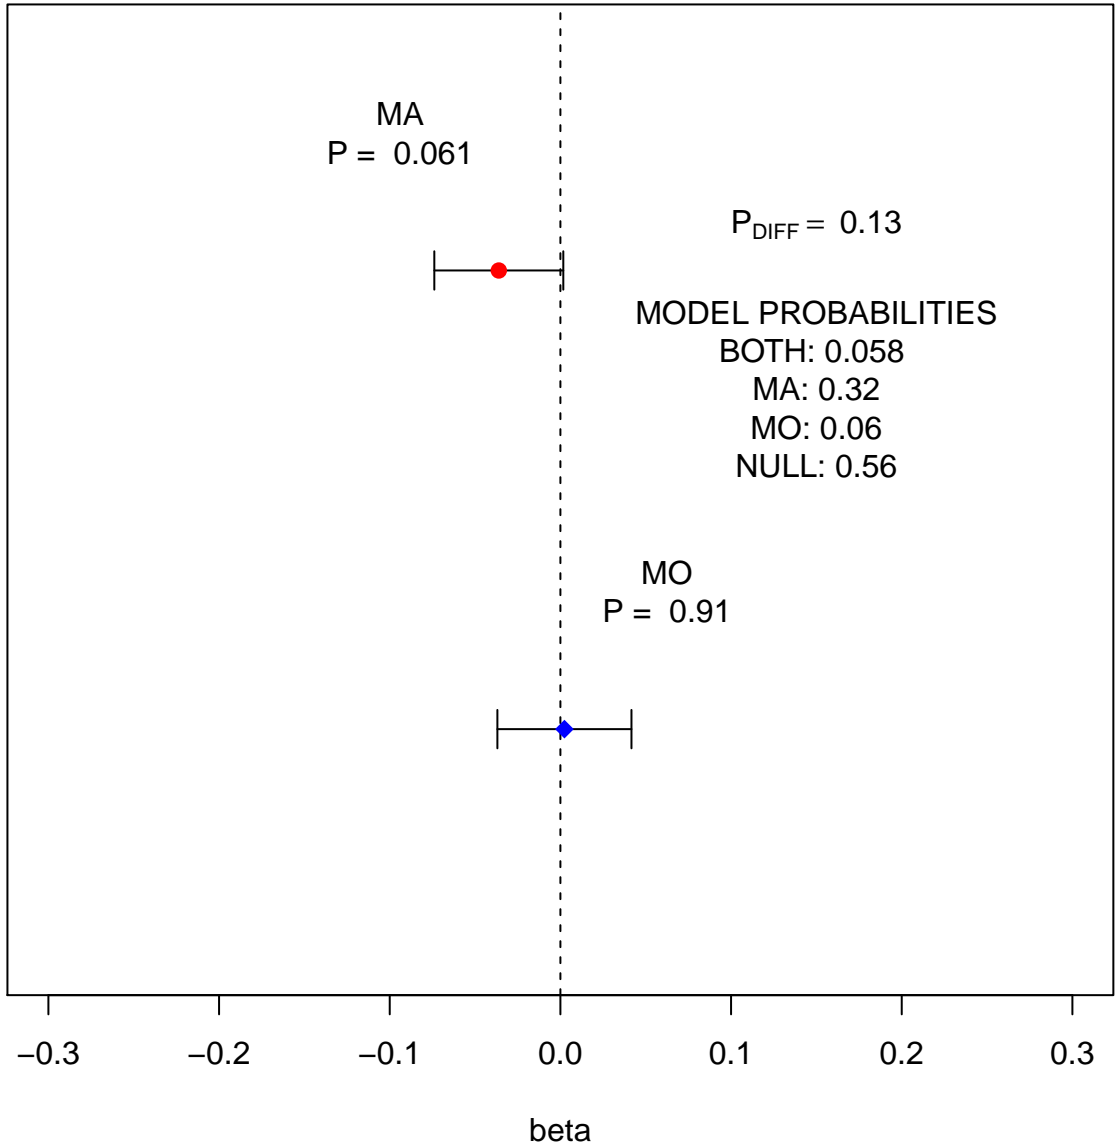

# ITGB5 (rs1499963)

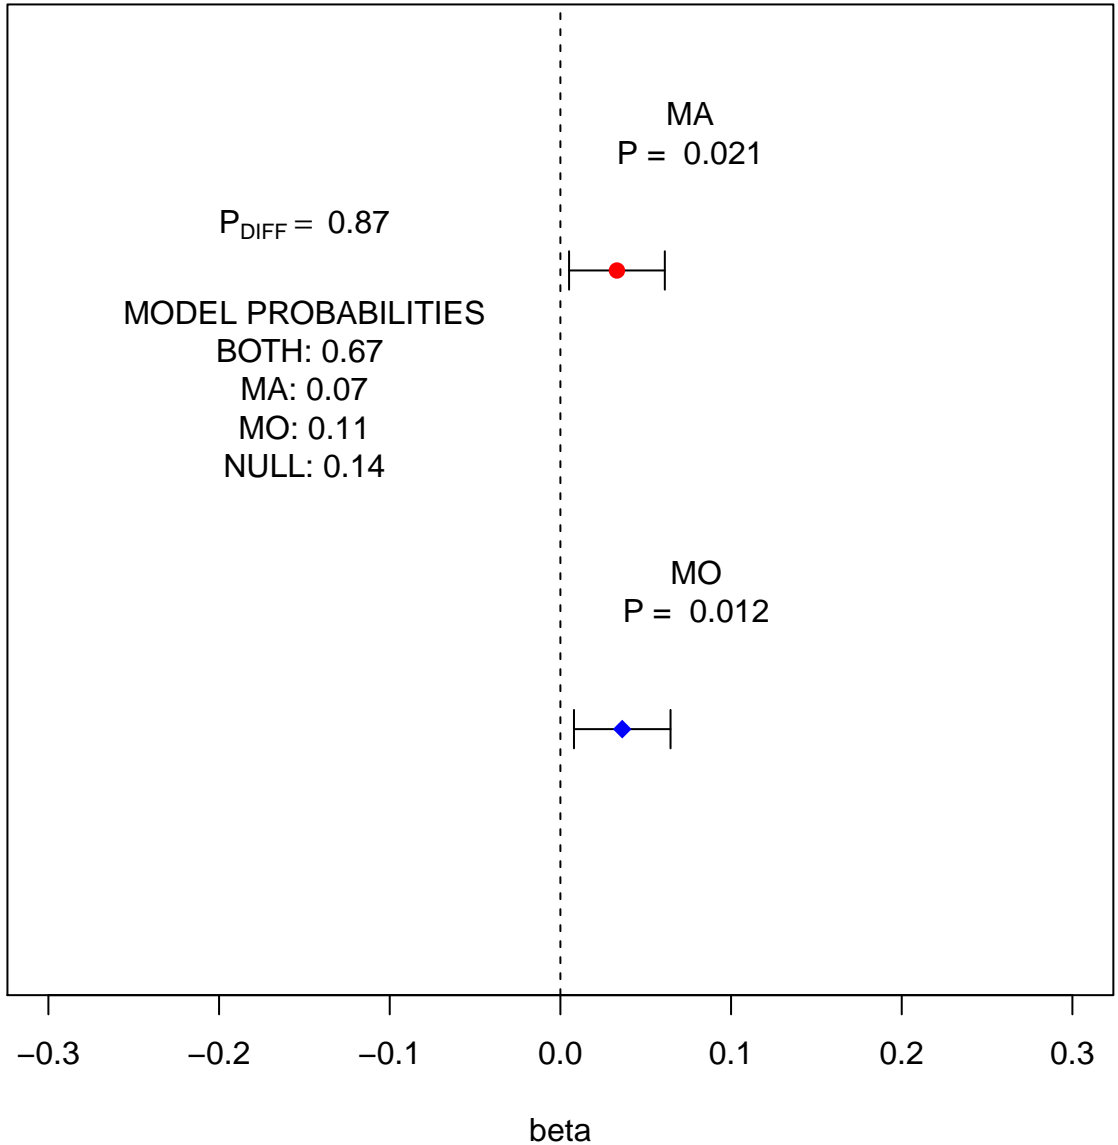

# near GPR149 (rs13078967)

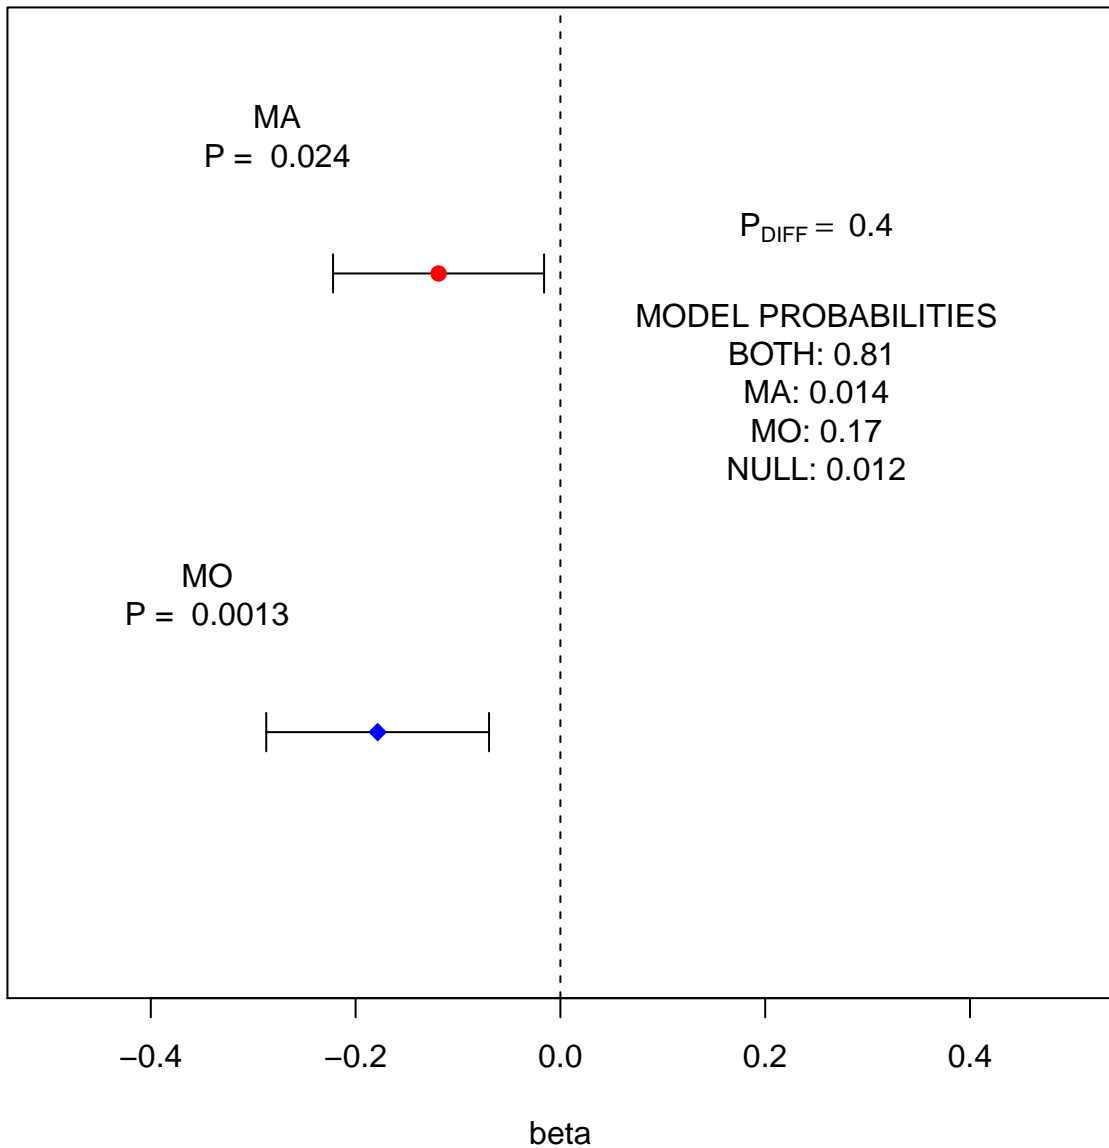



# near SEC63P2 (rs73805934)

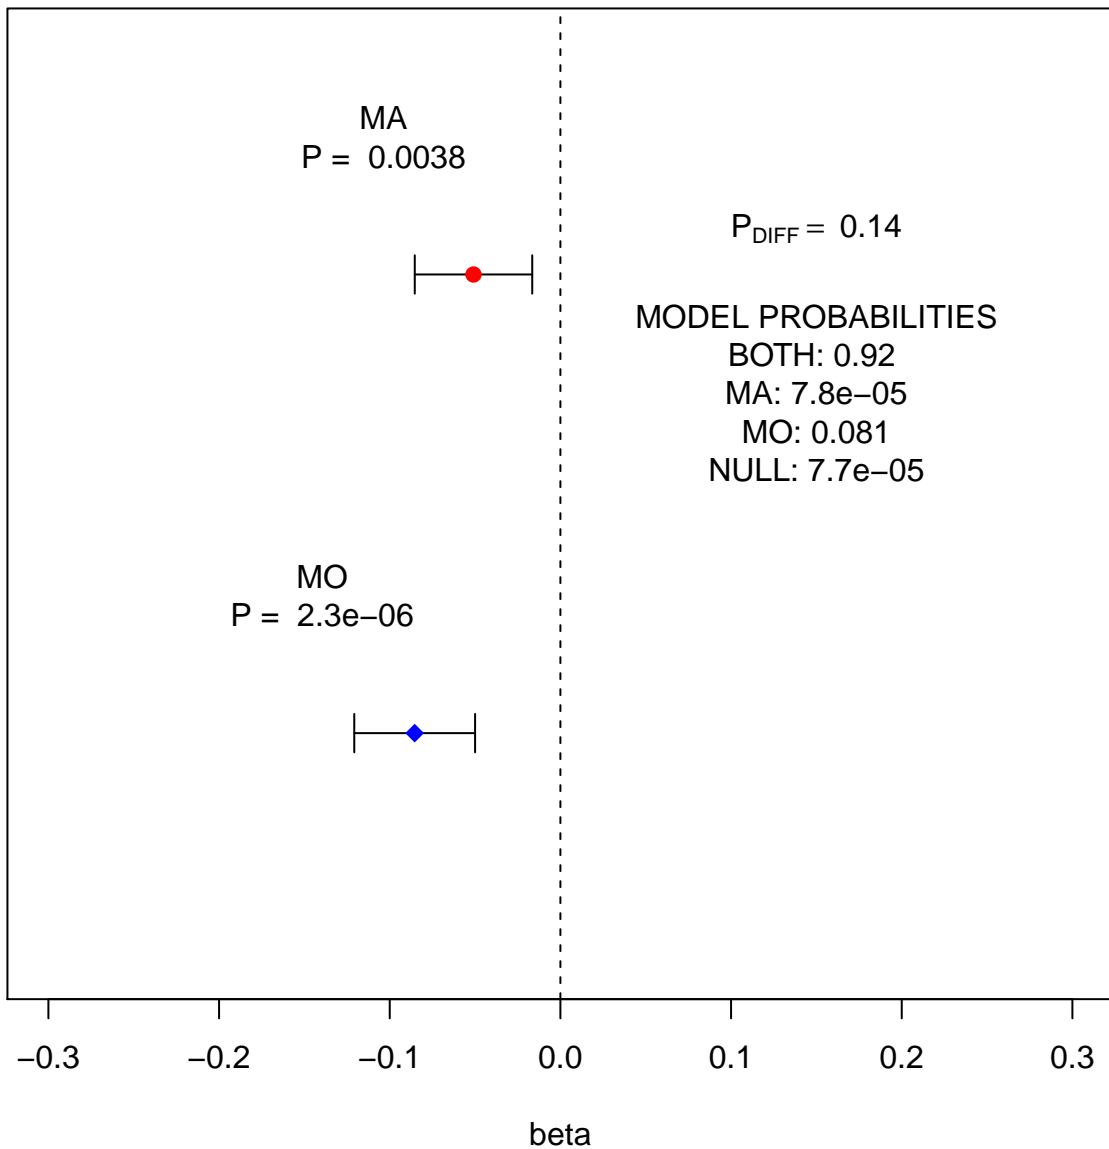

# near SPINK2 (rs7684253)

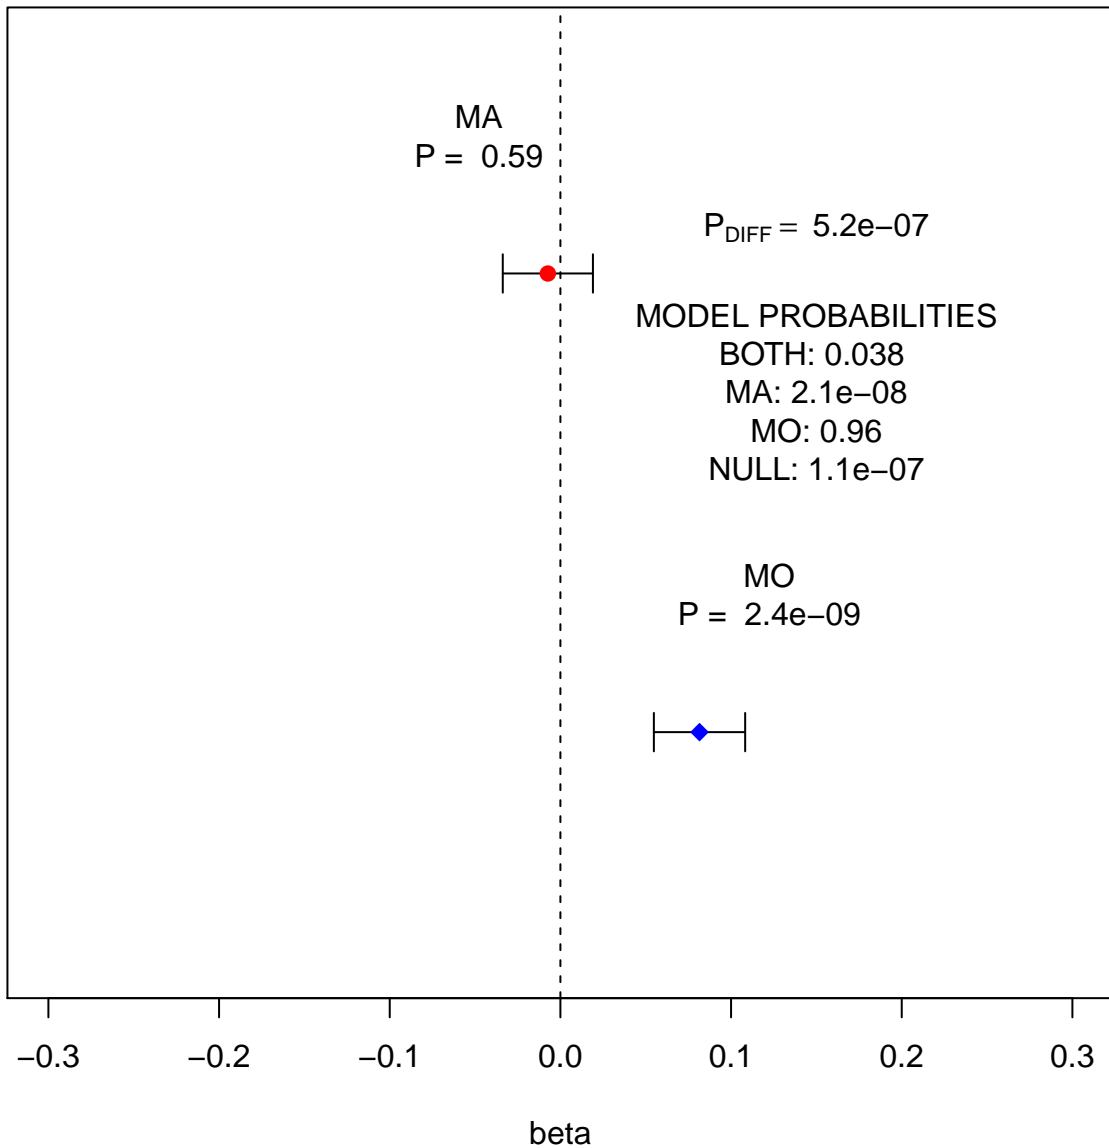

# ANKDD1B (rs42854)

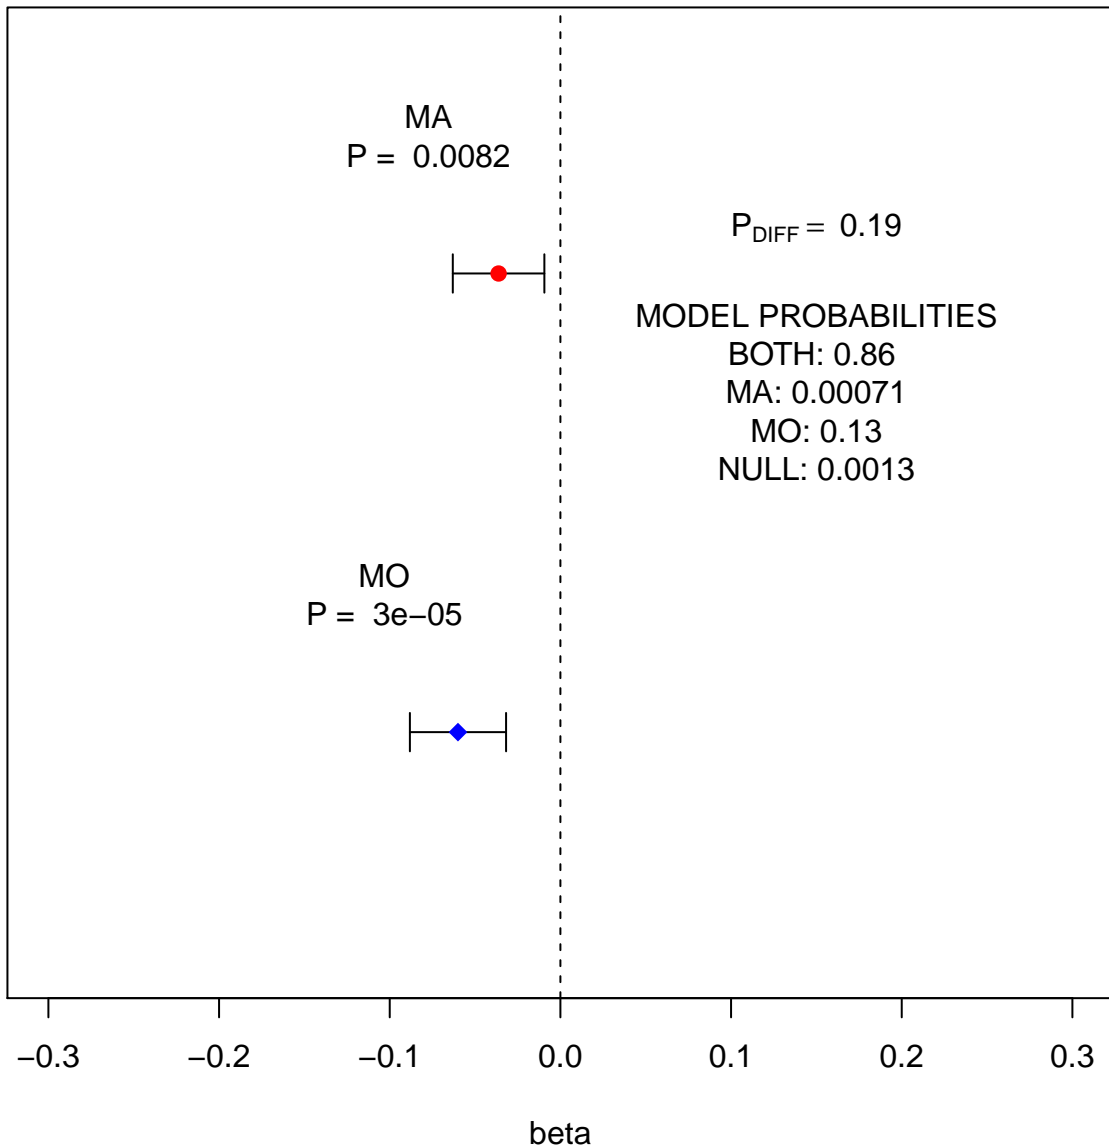

# near SSBP2 (rs12653216)

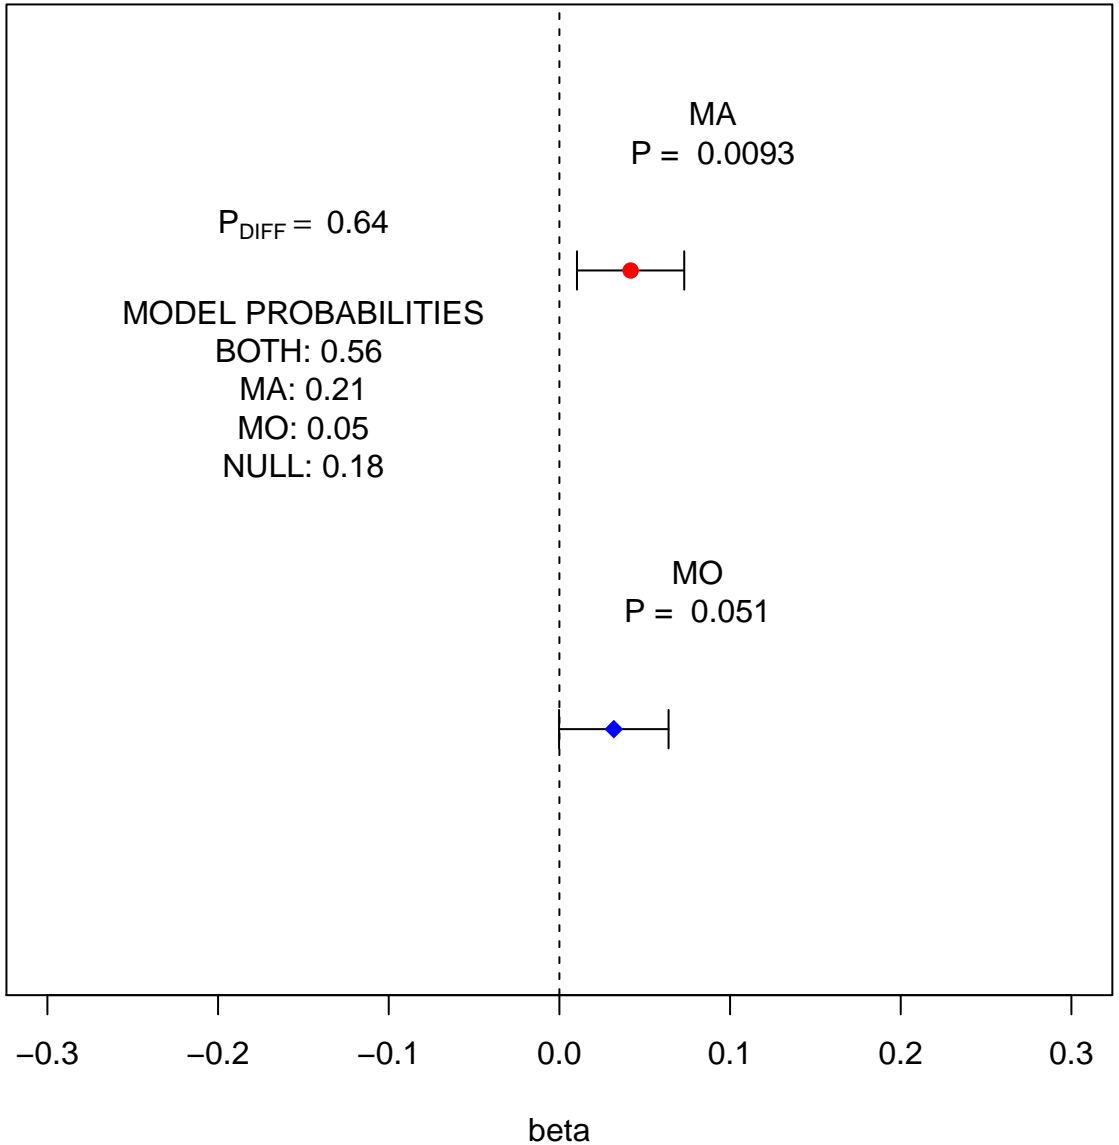

# near ZNF474 (rs11957829)

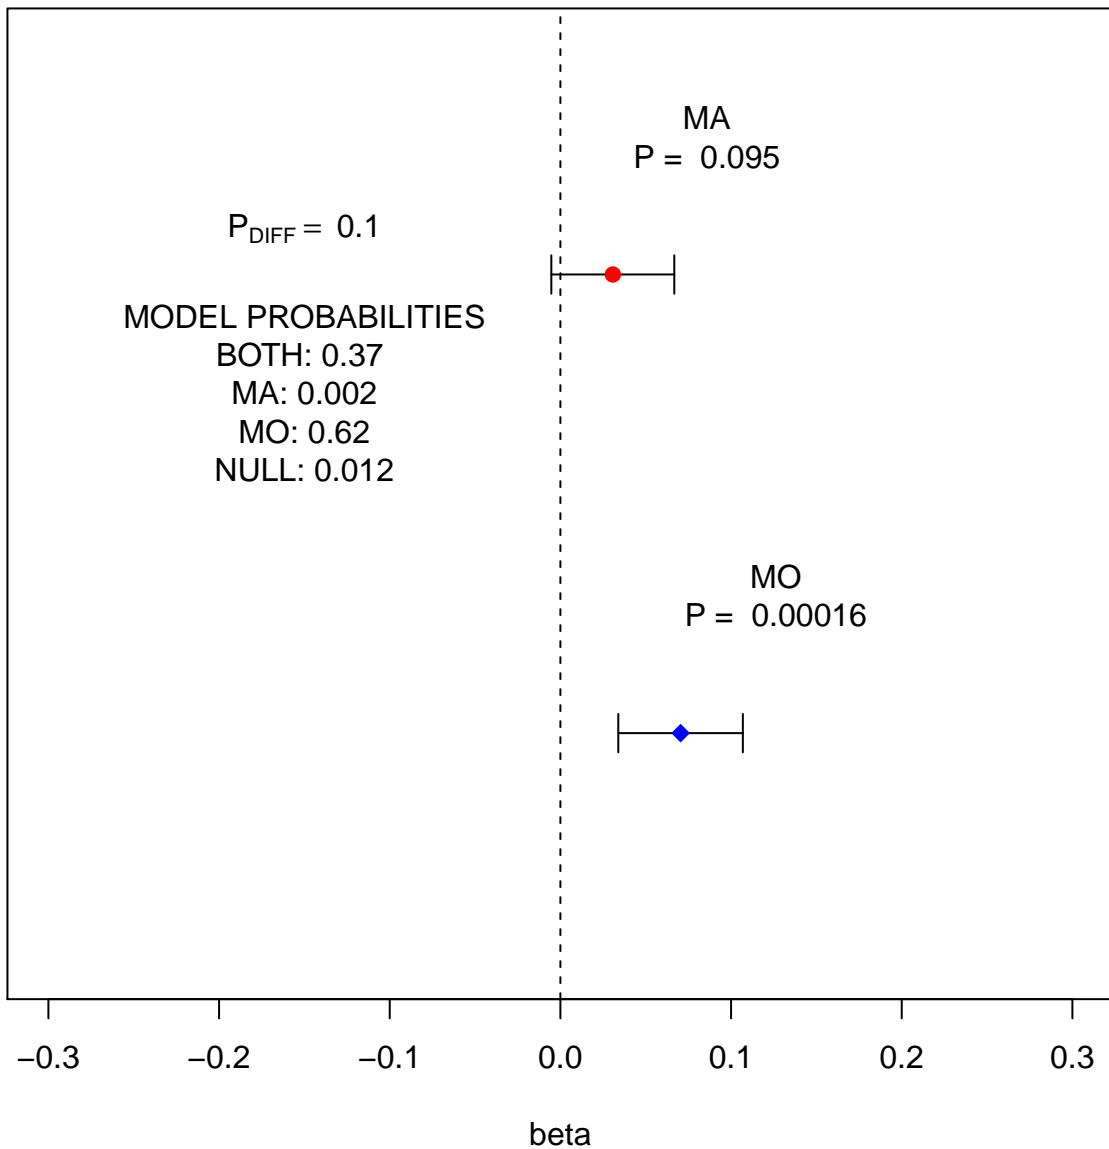

# SNX24 (rs246326)

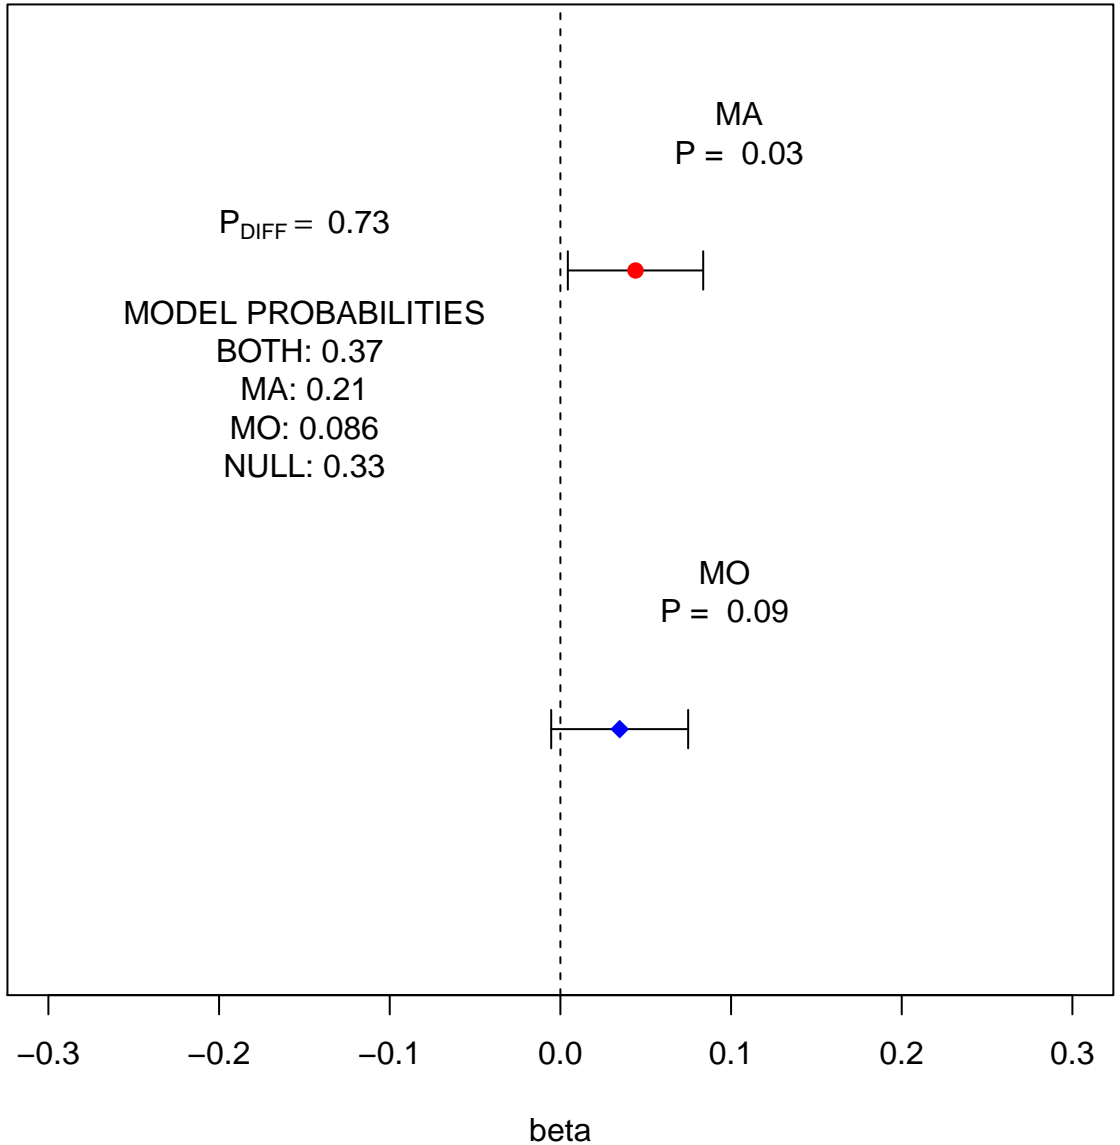

# near POU4F3 (rs10038882)

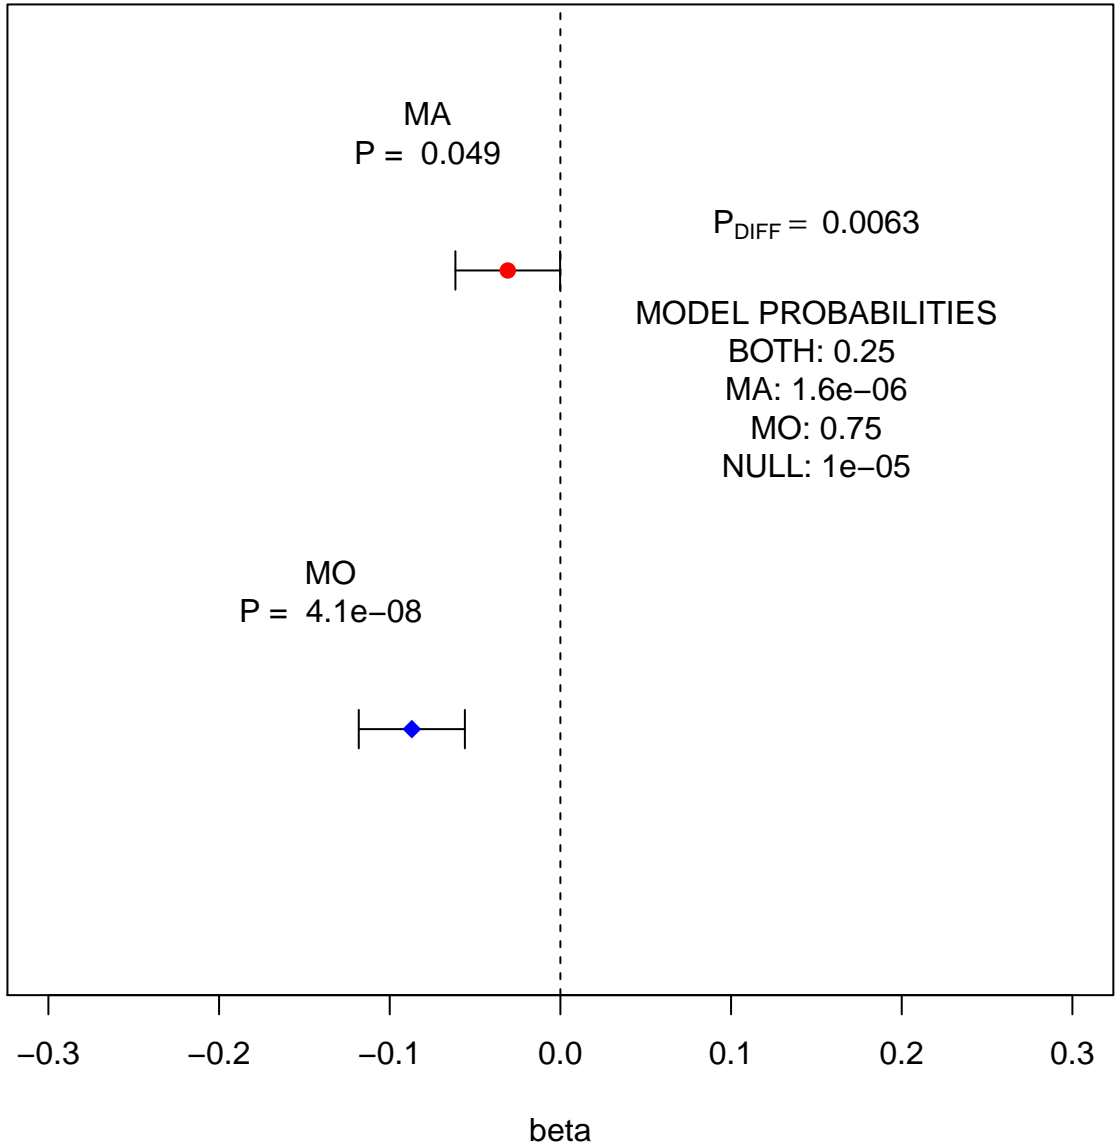

# TIGD6|HMGXB3 (rs4705403)

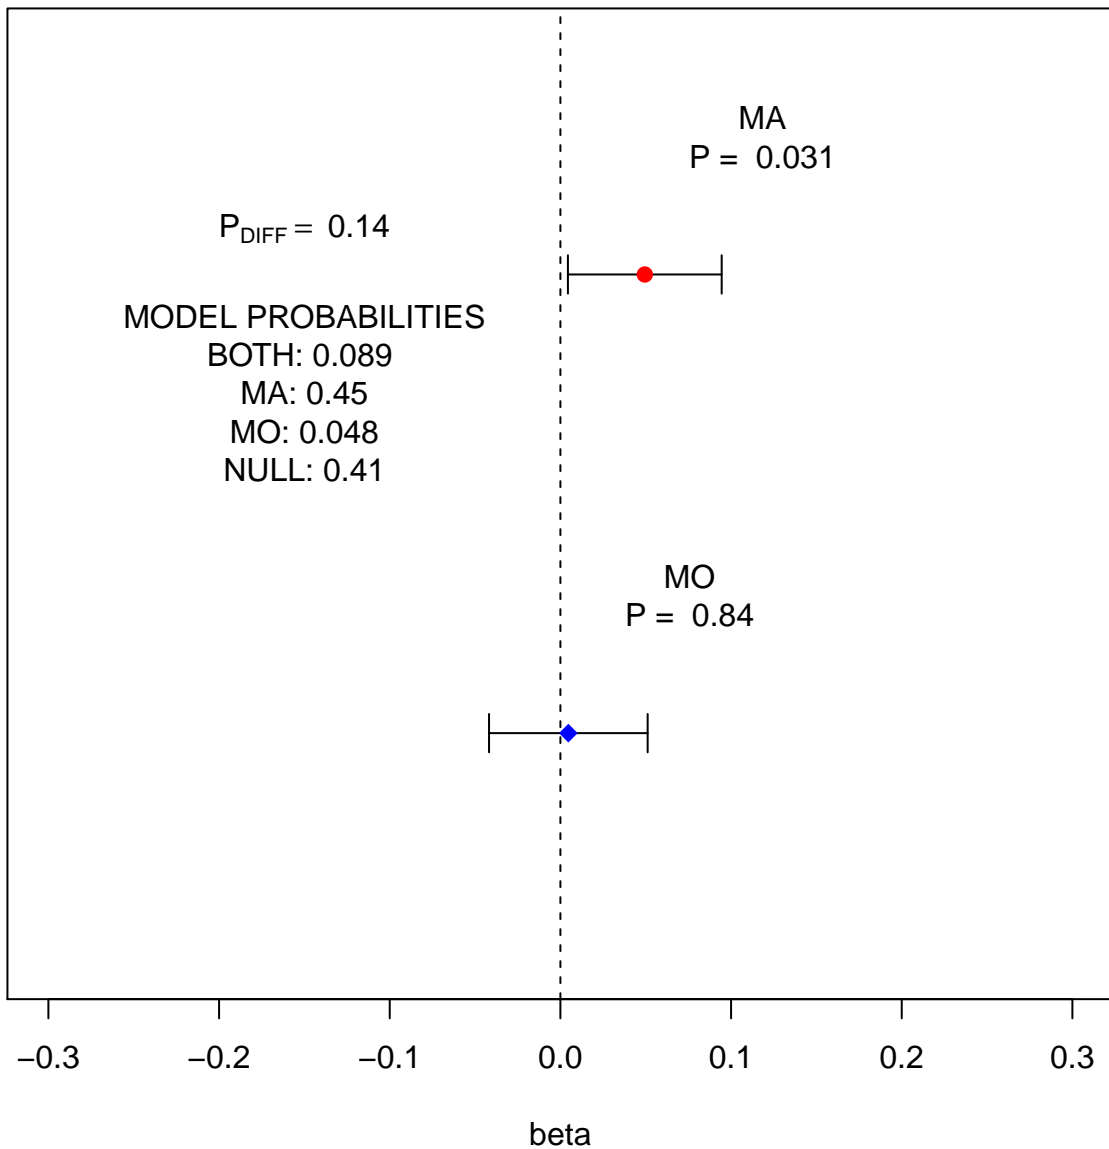



# near NKX2-5 (rs6556059)

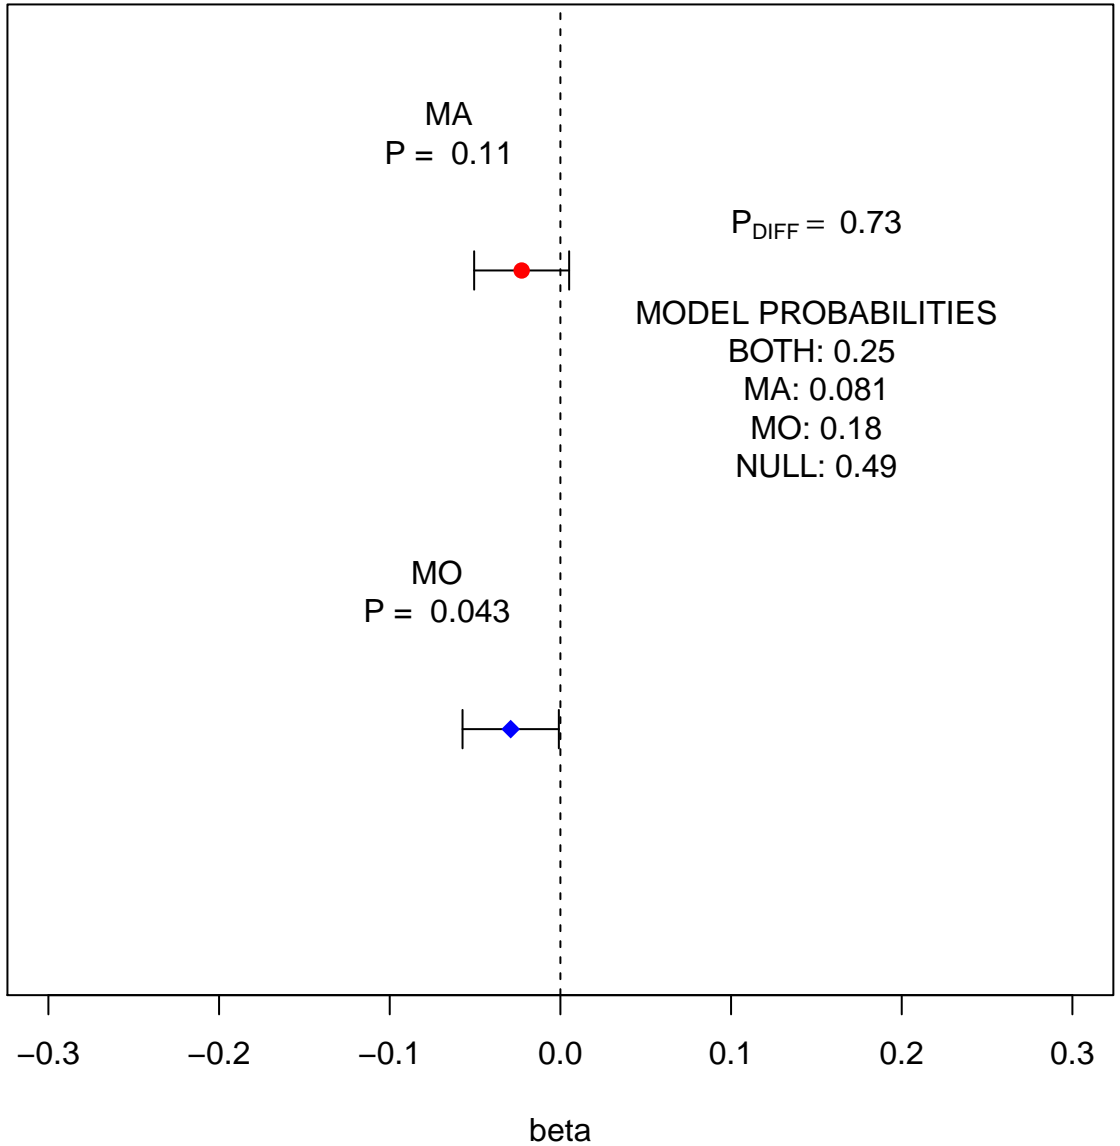

# NSD1 (rs10866704)

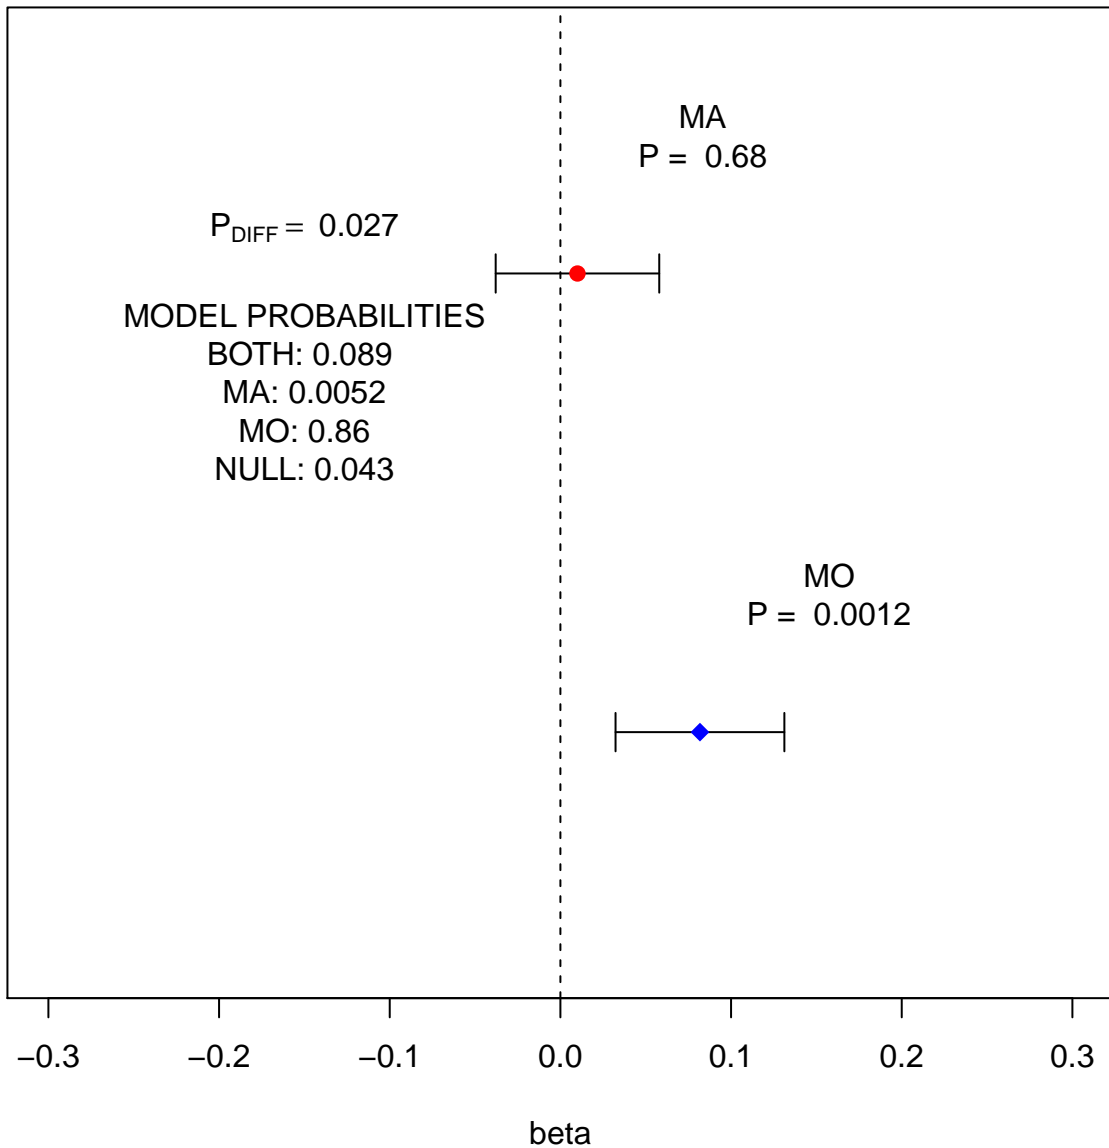

# PHACTR1 (rs9349379)

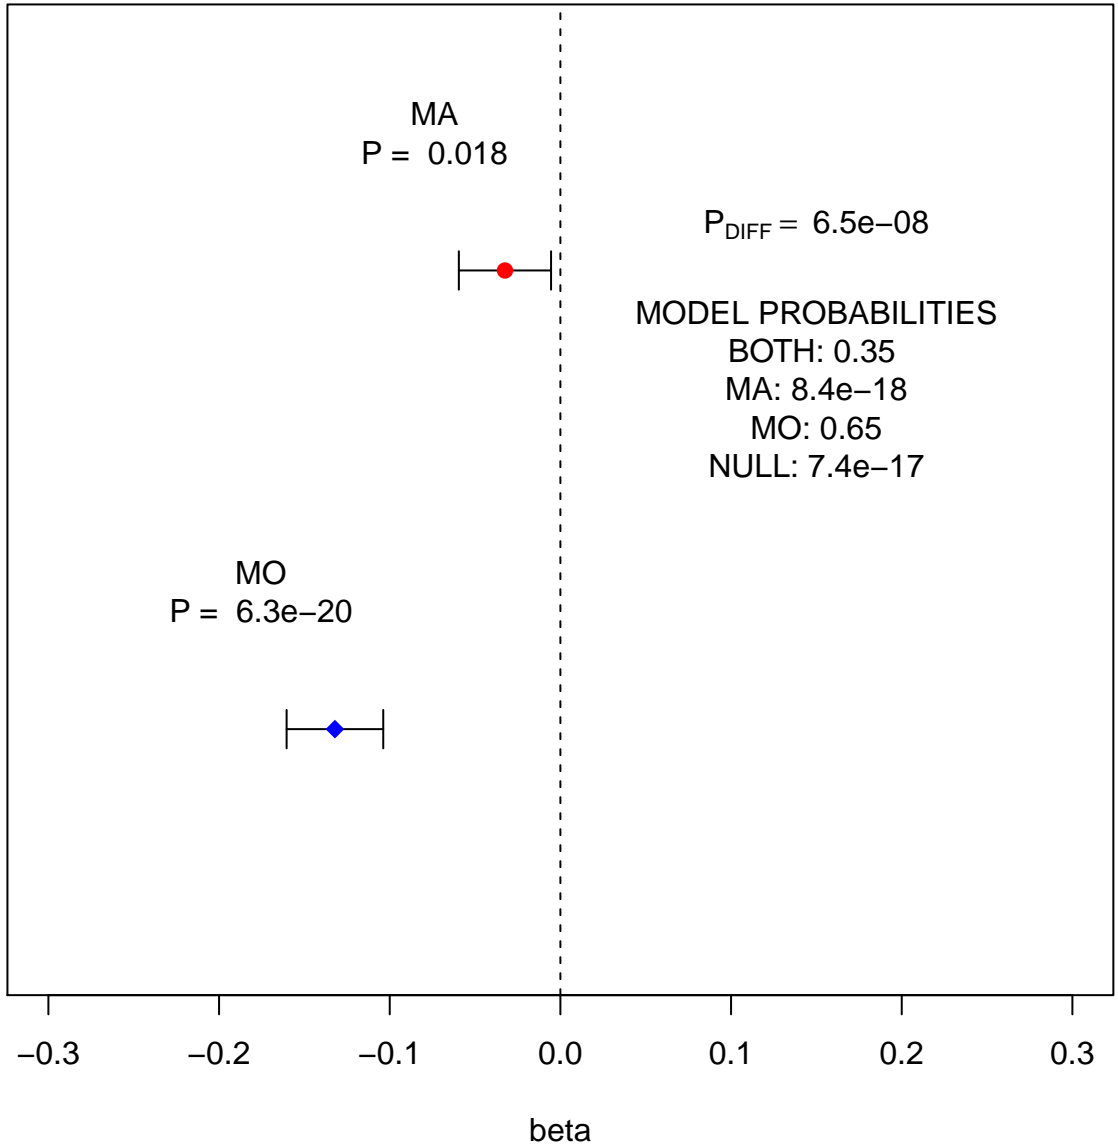

# near PRL (rs9295536)

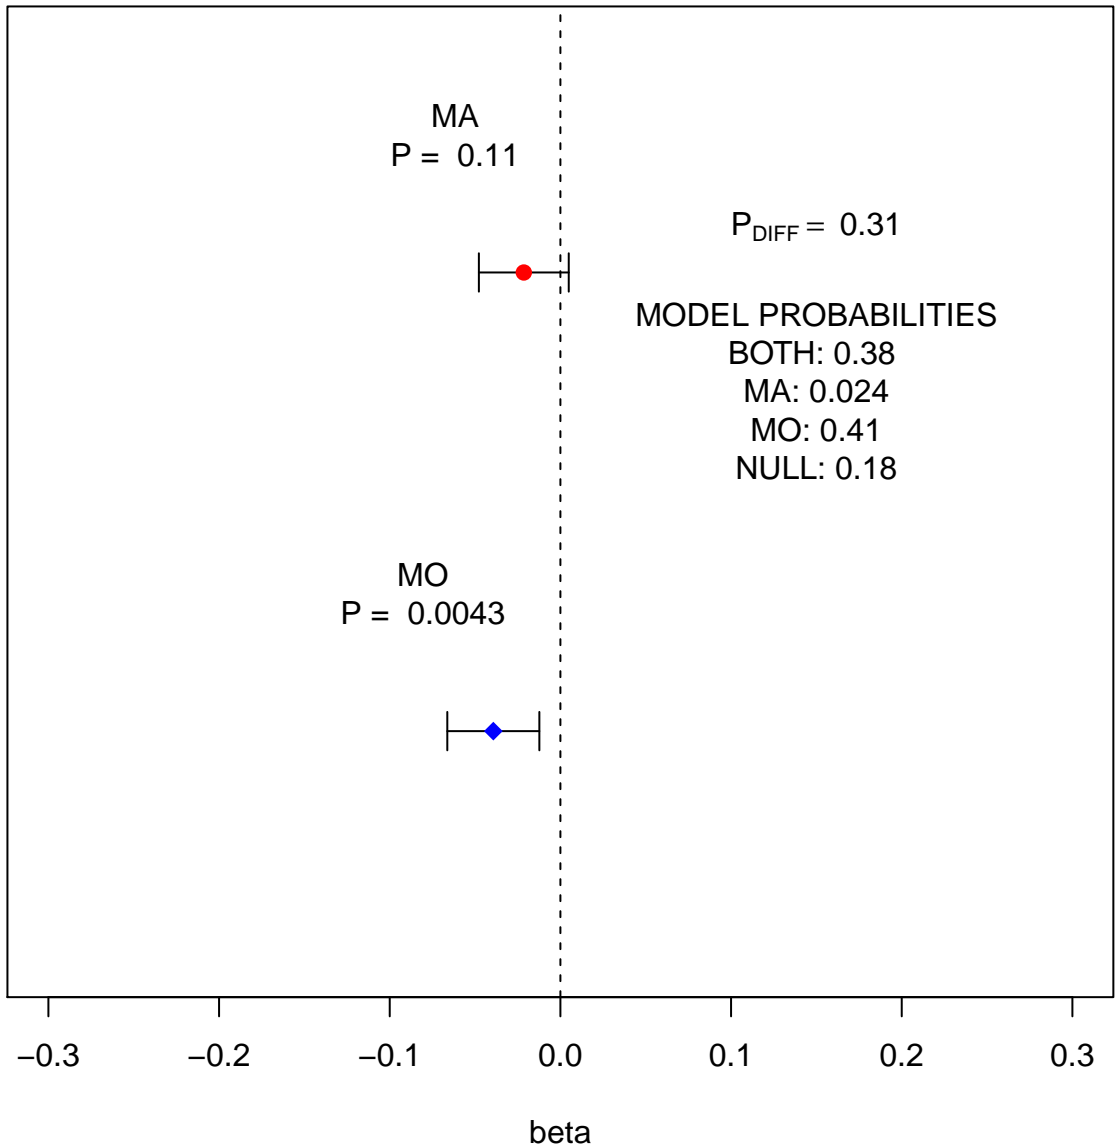

# near IER3 (rs9468830)

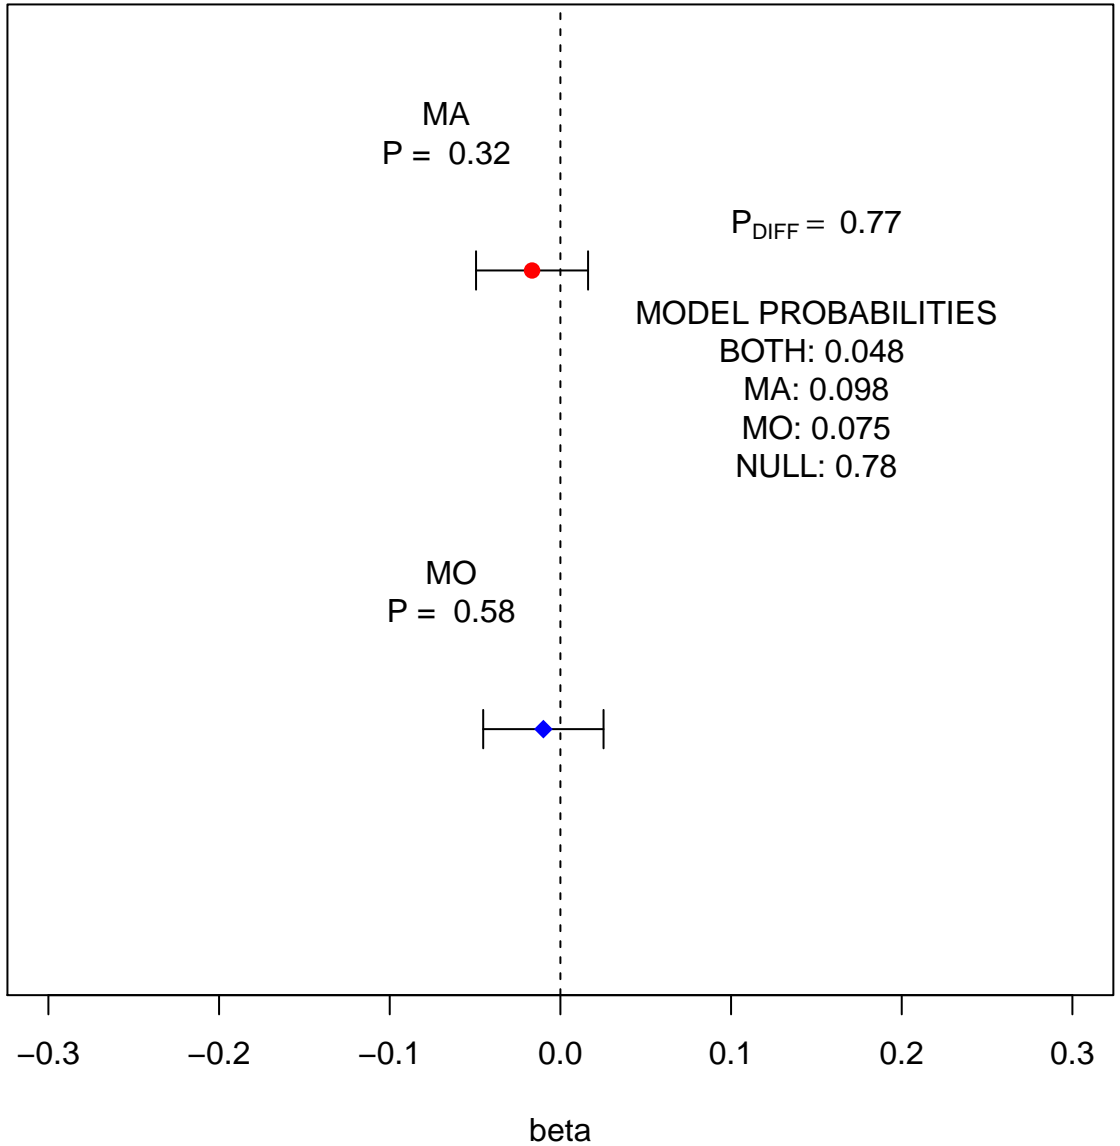

# EHMT2 (rs74434374)

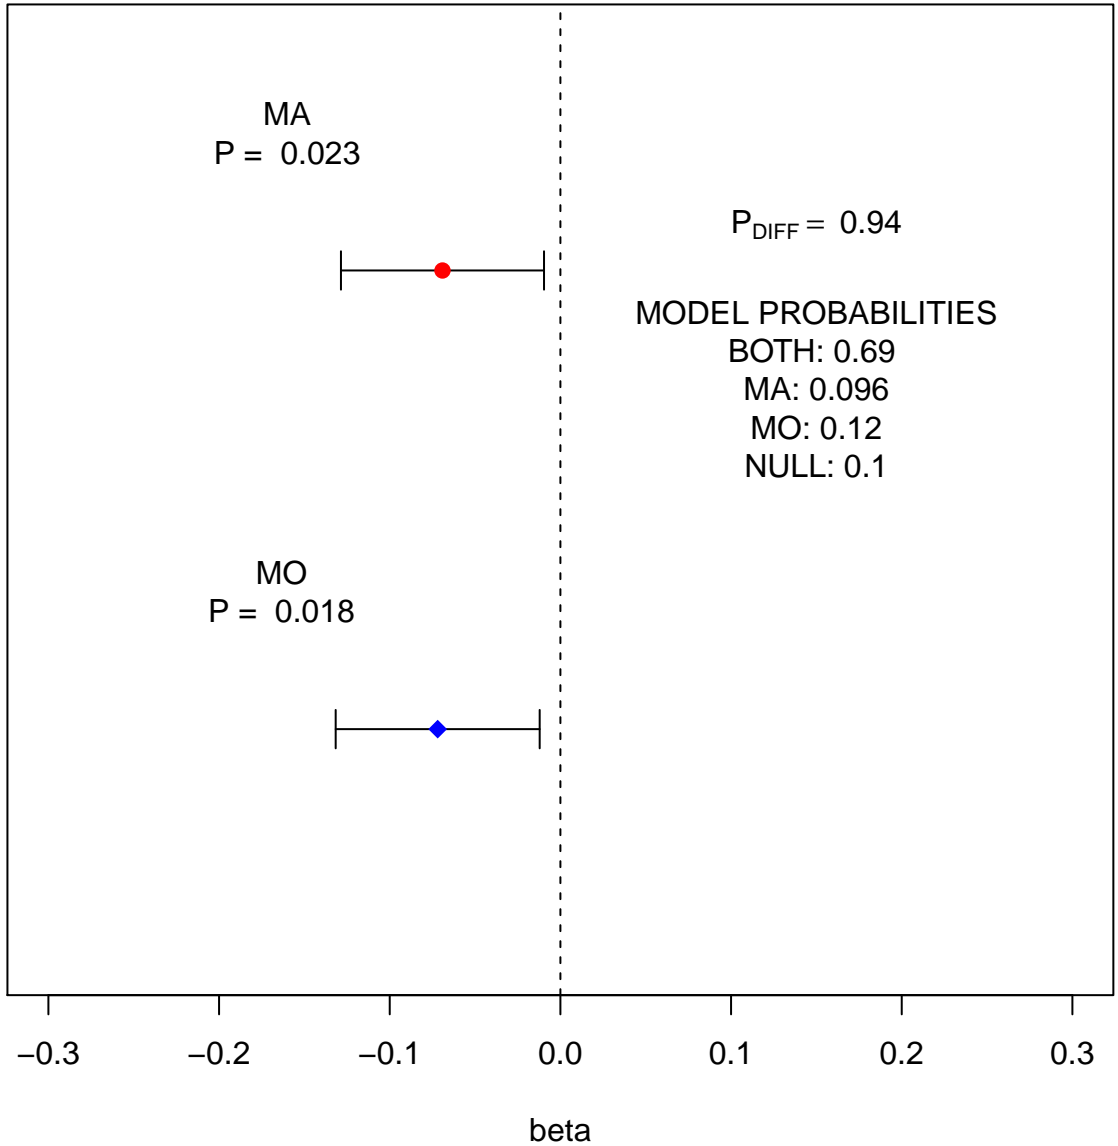

# KCNK5 (rs10456100)

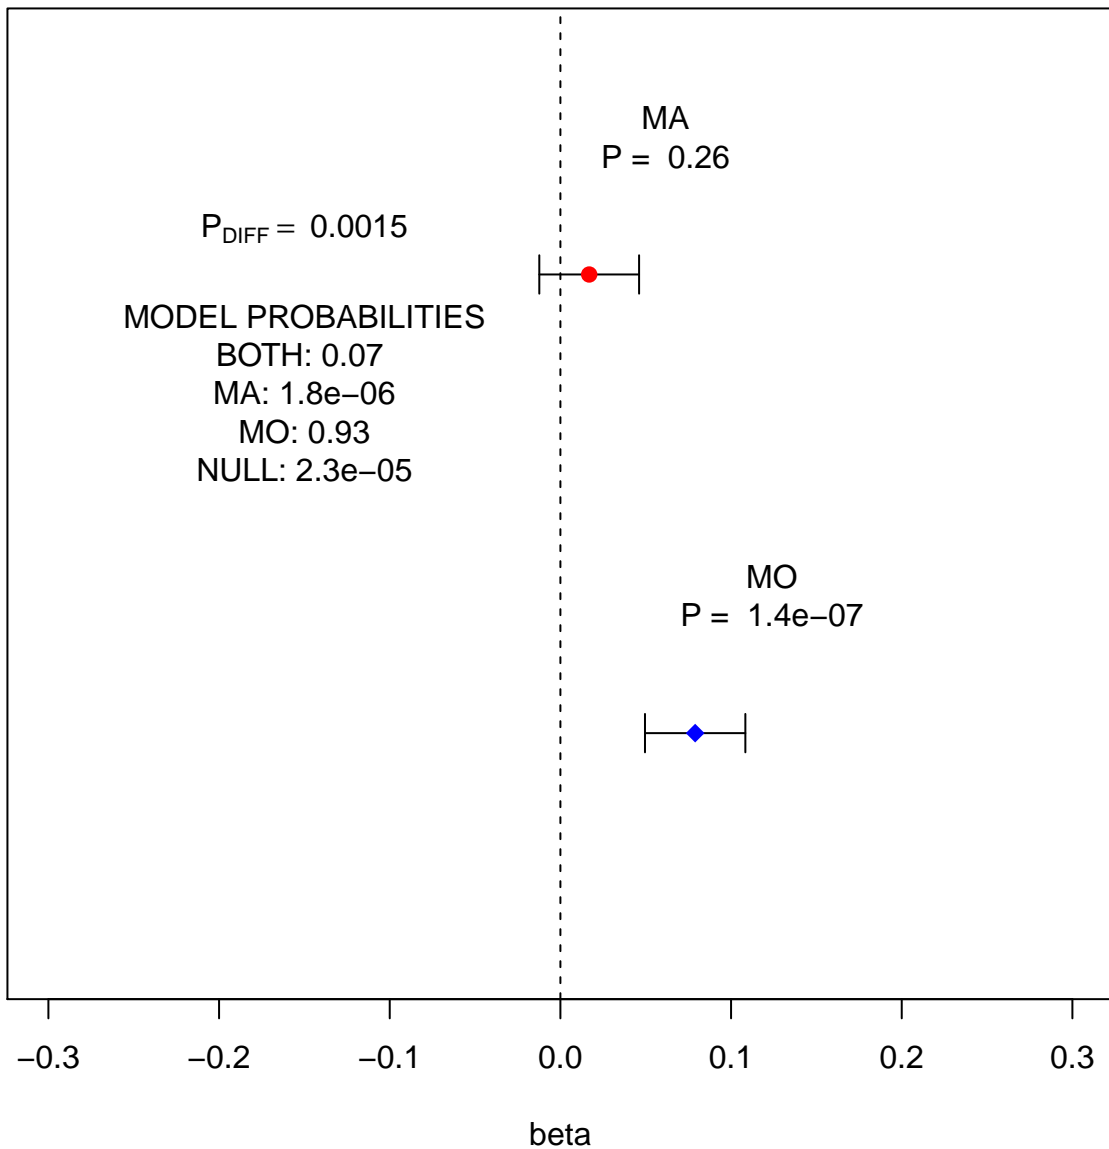

# near KRT19P1 (rs34273564)

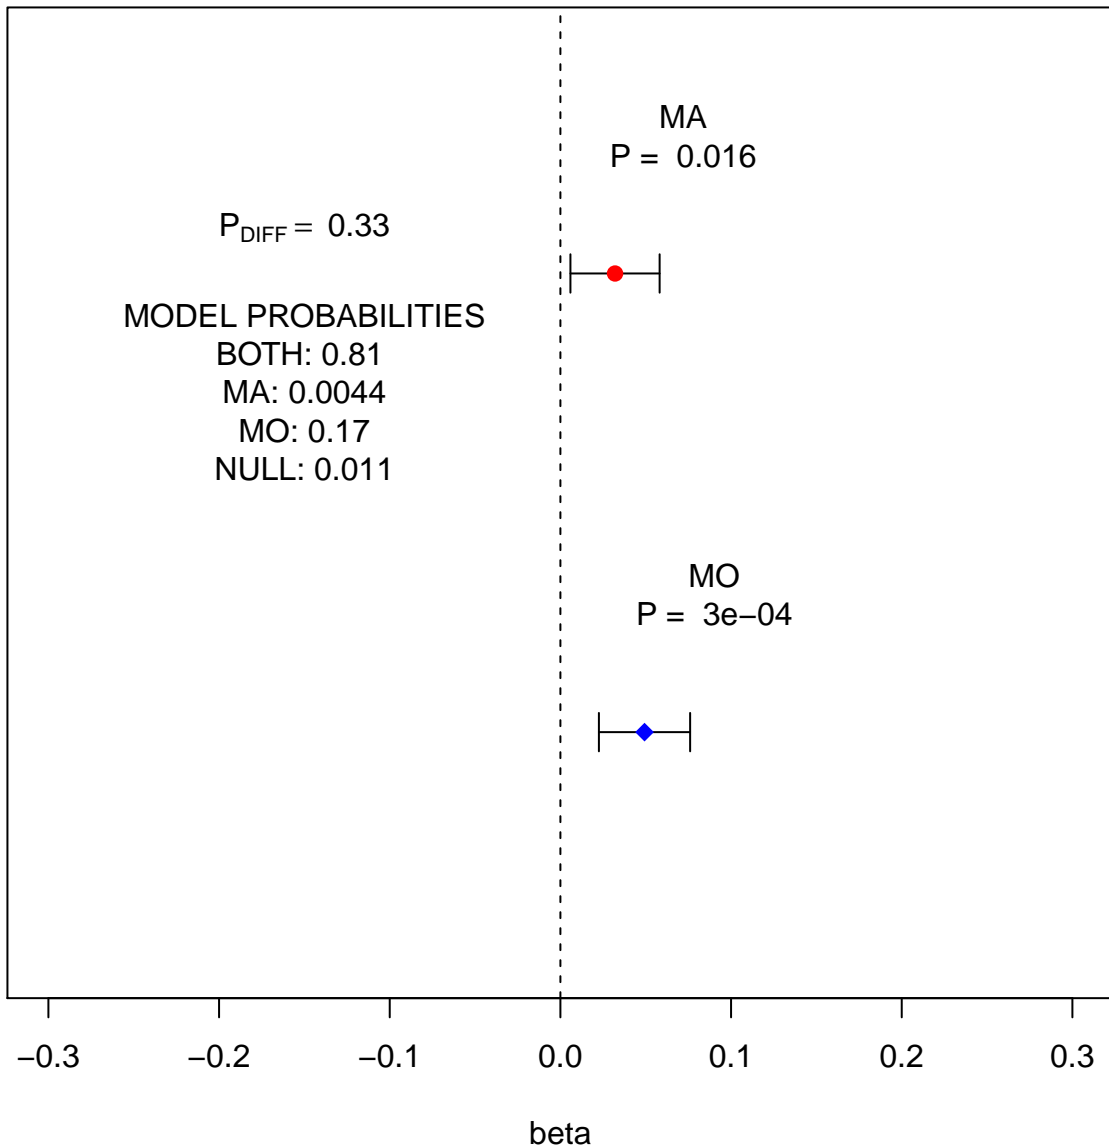



# FHL5 (rs11153082)

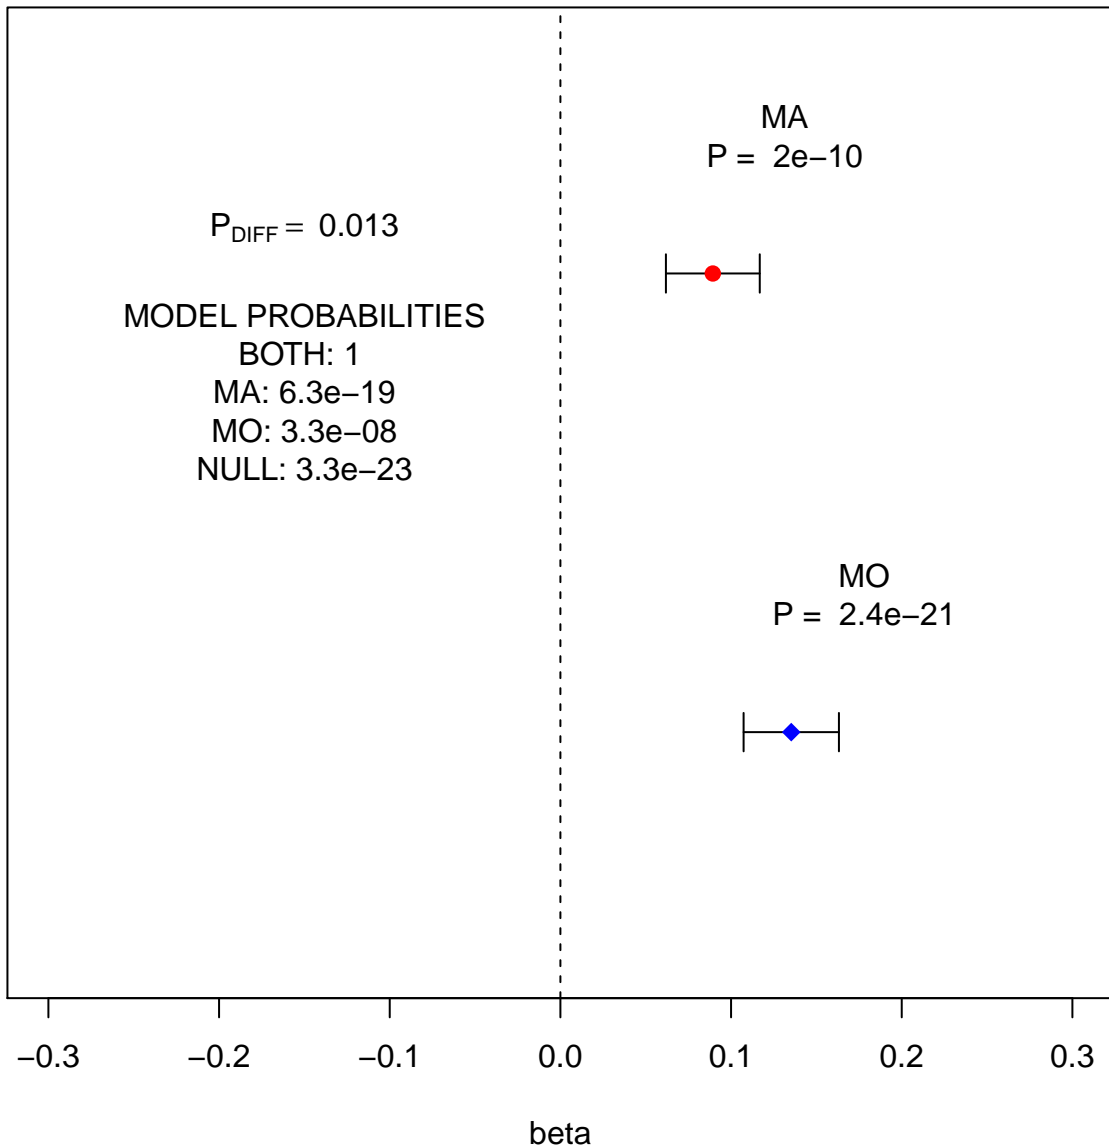

# REV3L (rs6568677)

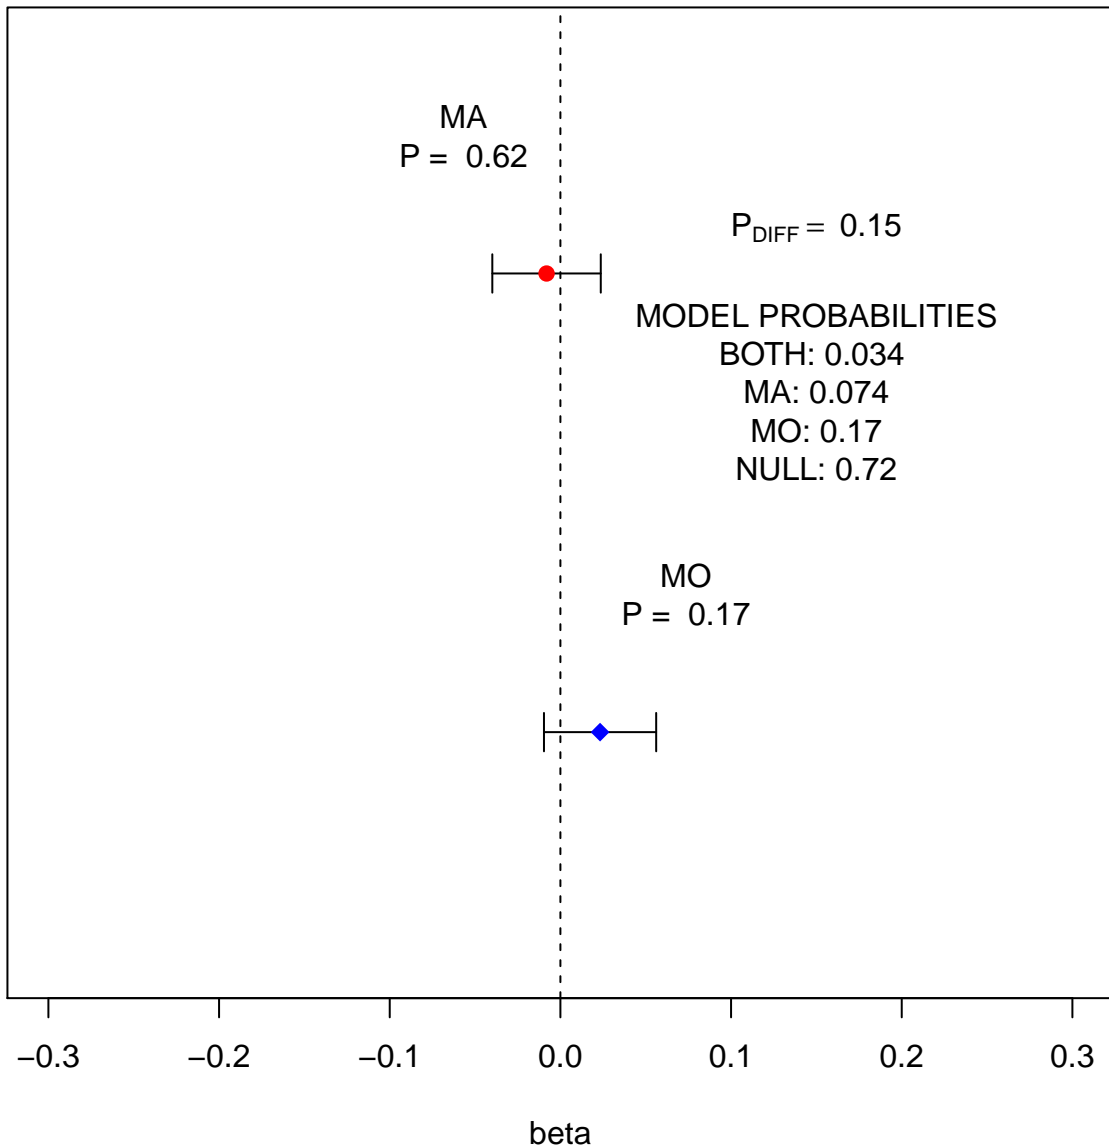

# near GJA1 (rs2845731)

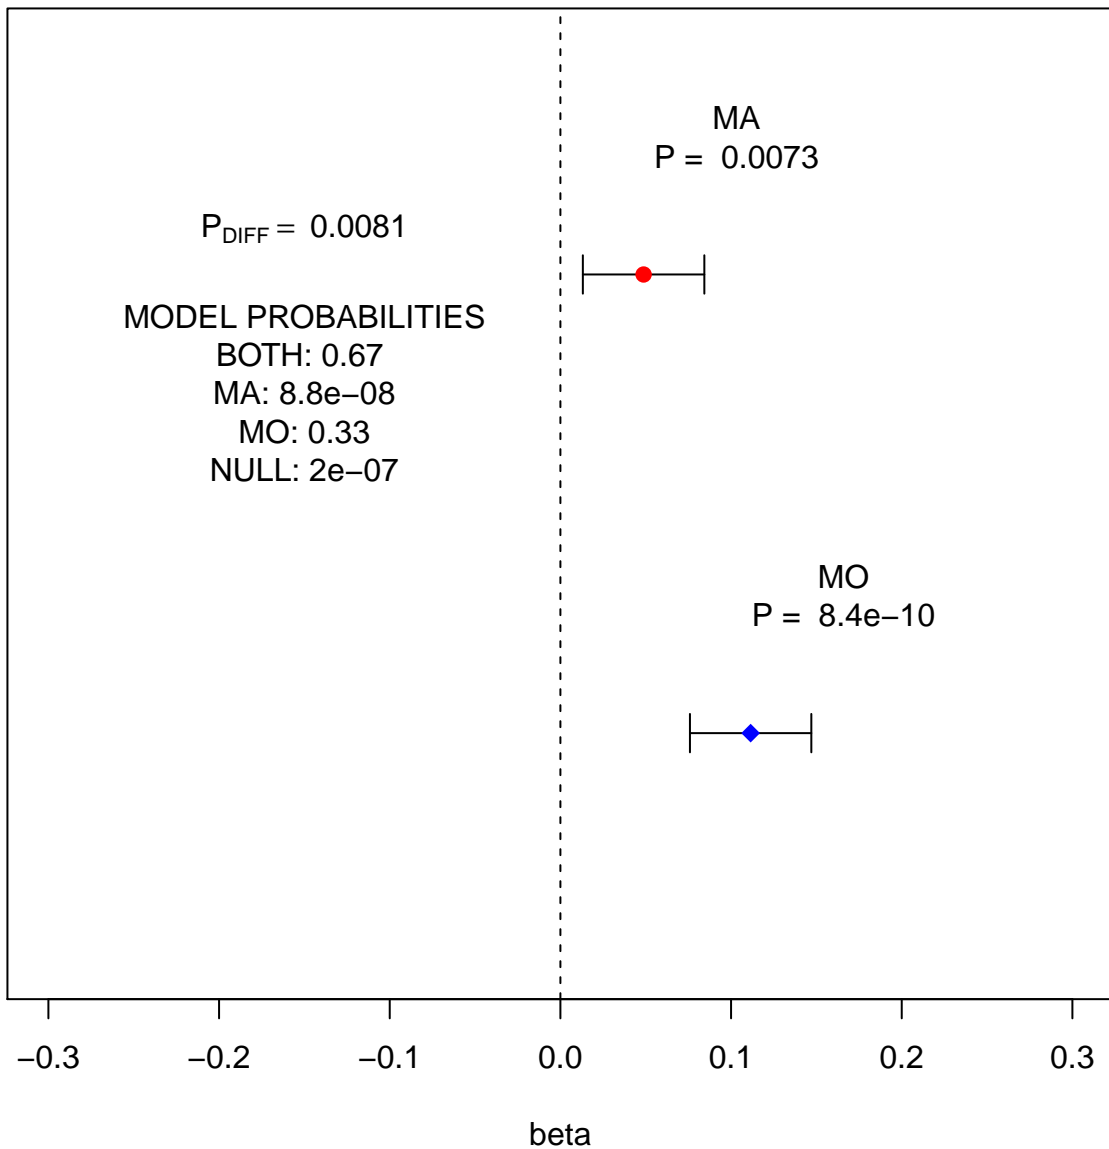

# near PCMT1 (rs9383843)

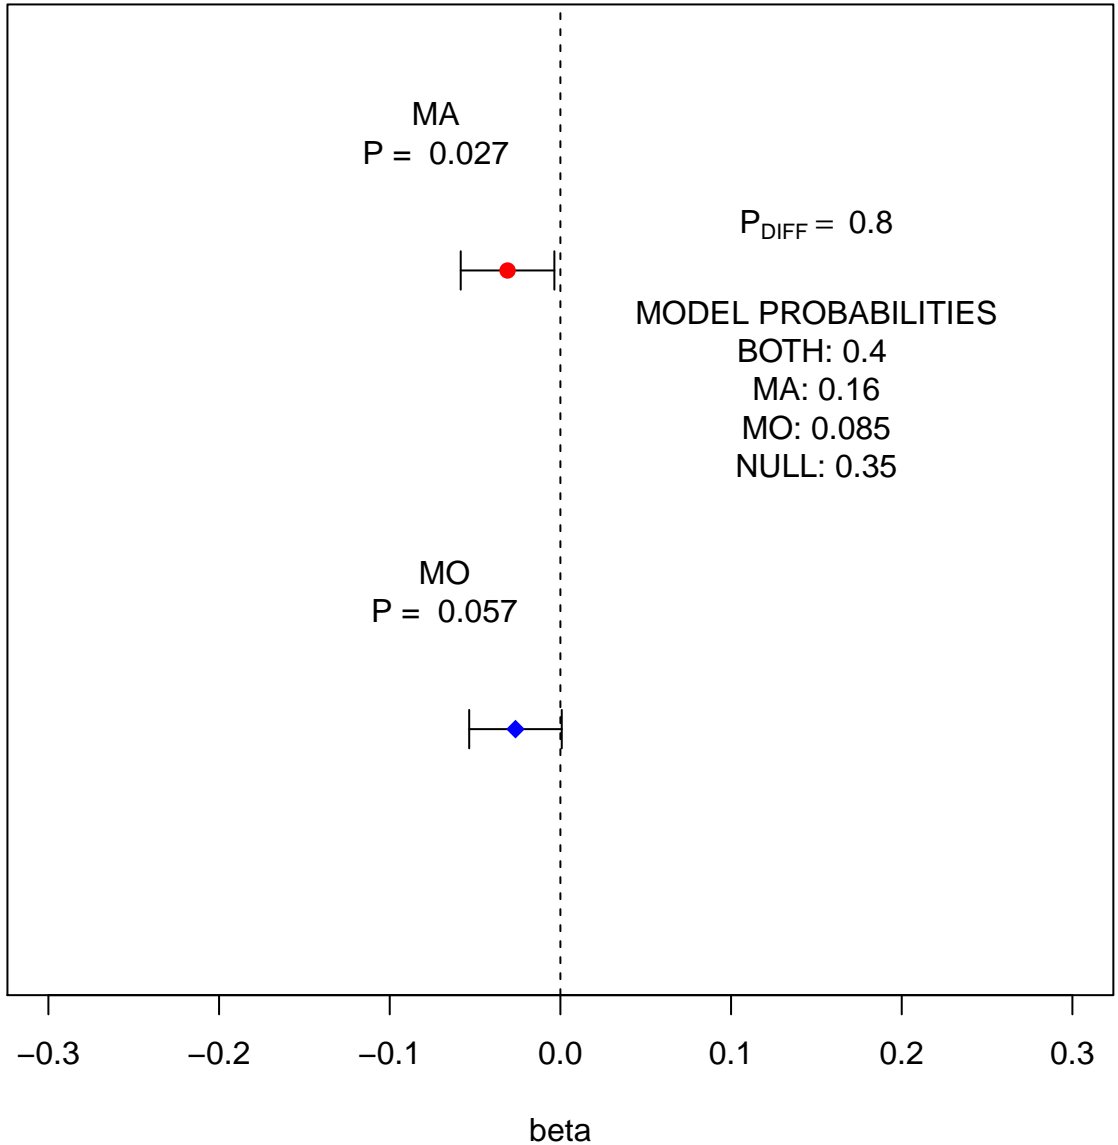

# SUGCT (rs10234636)

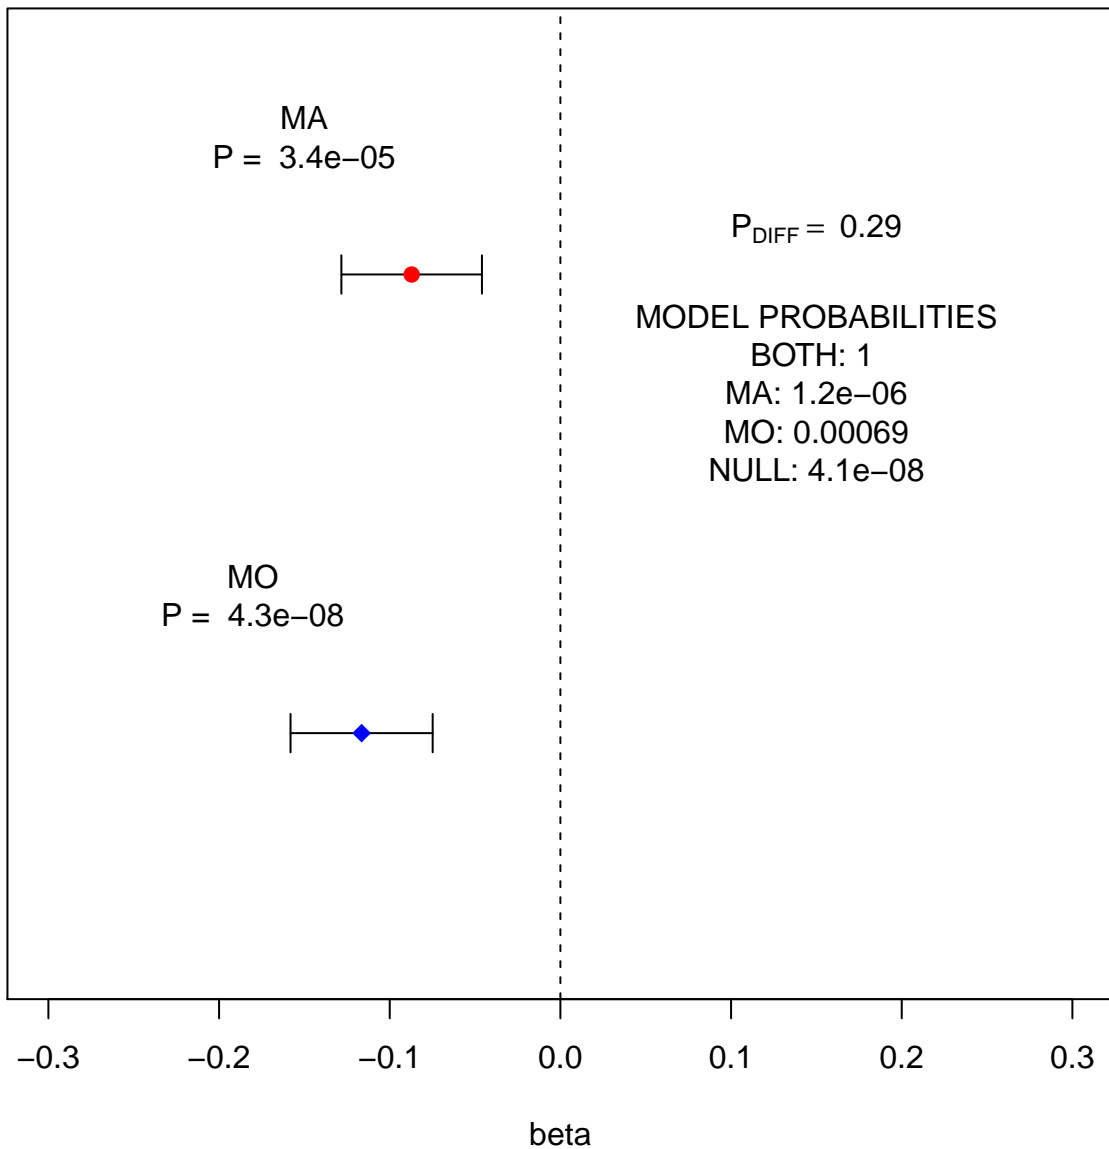

# MLXIPL (rs13235543)

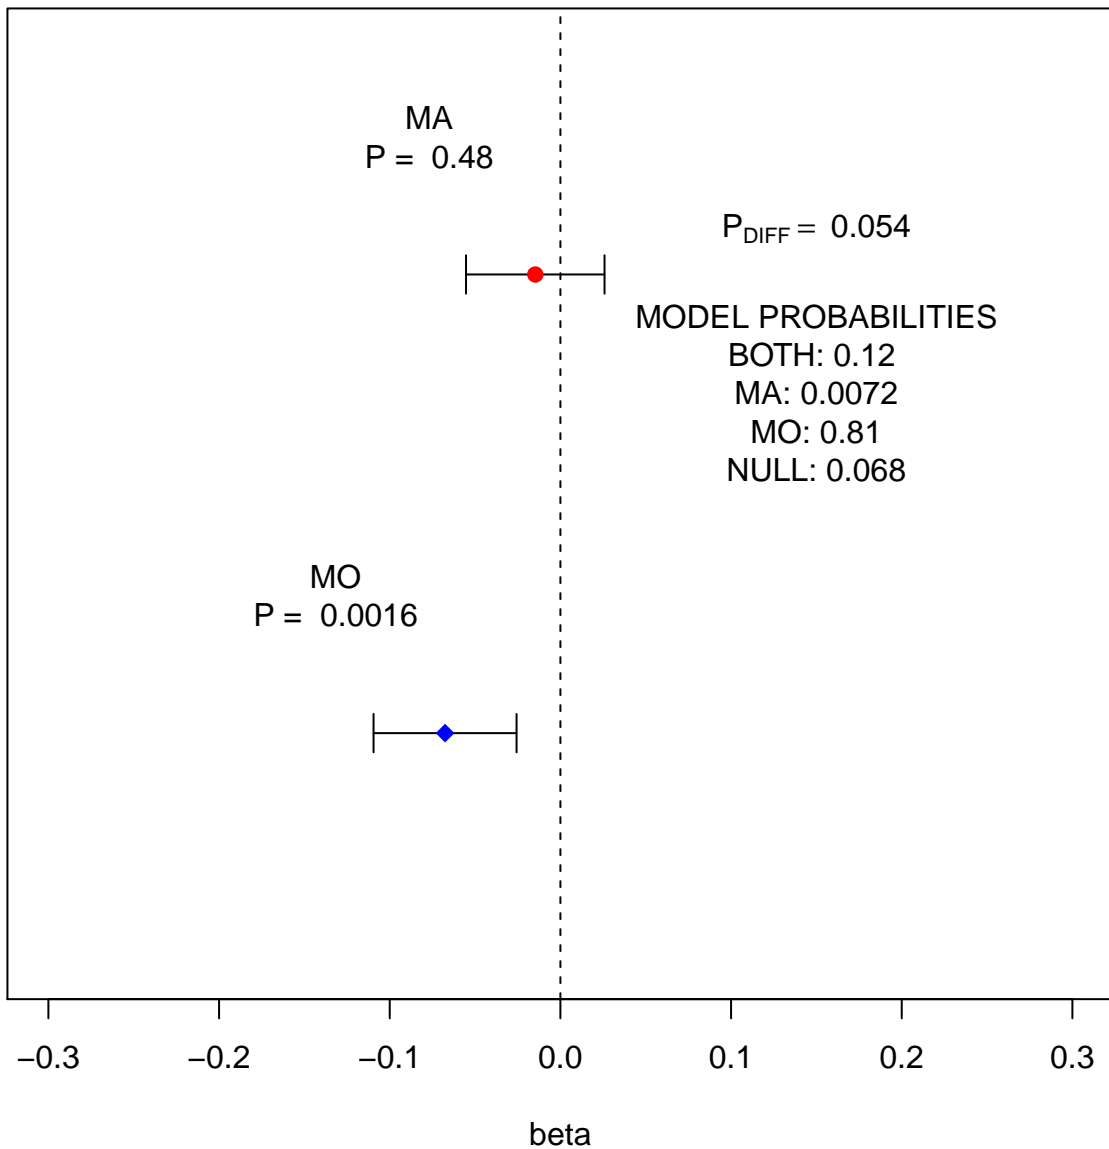

# TSPAN12 (rs56067931)

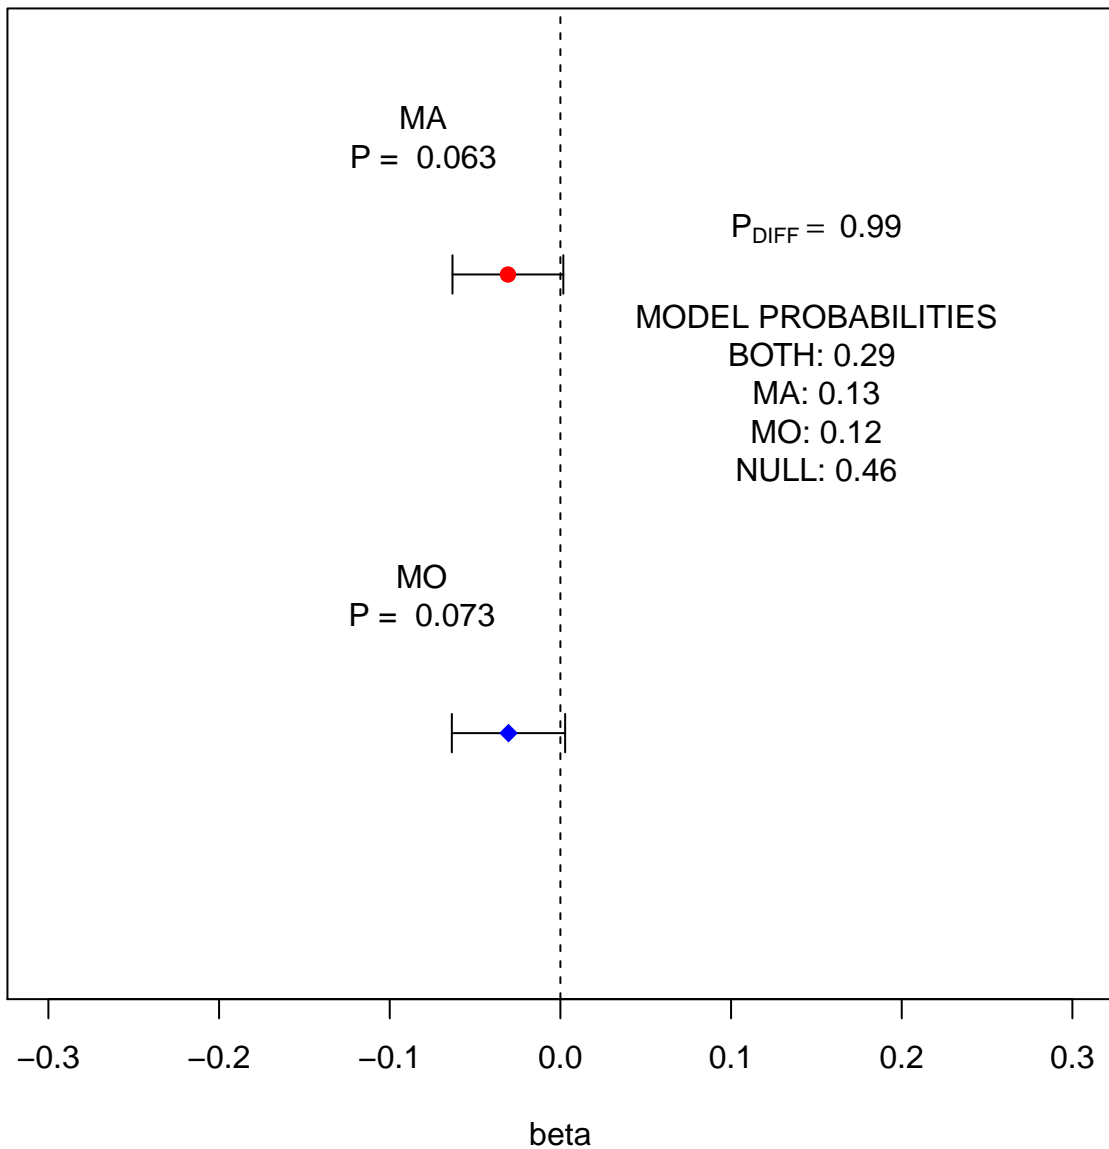

# PTK2B (rs11782789)

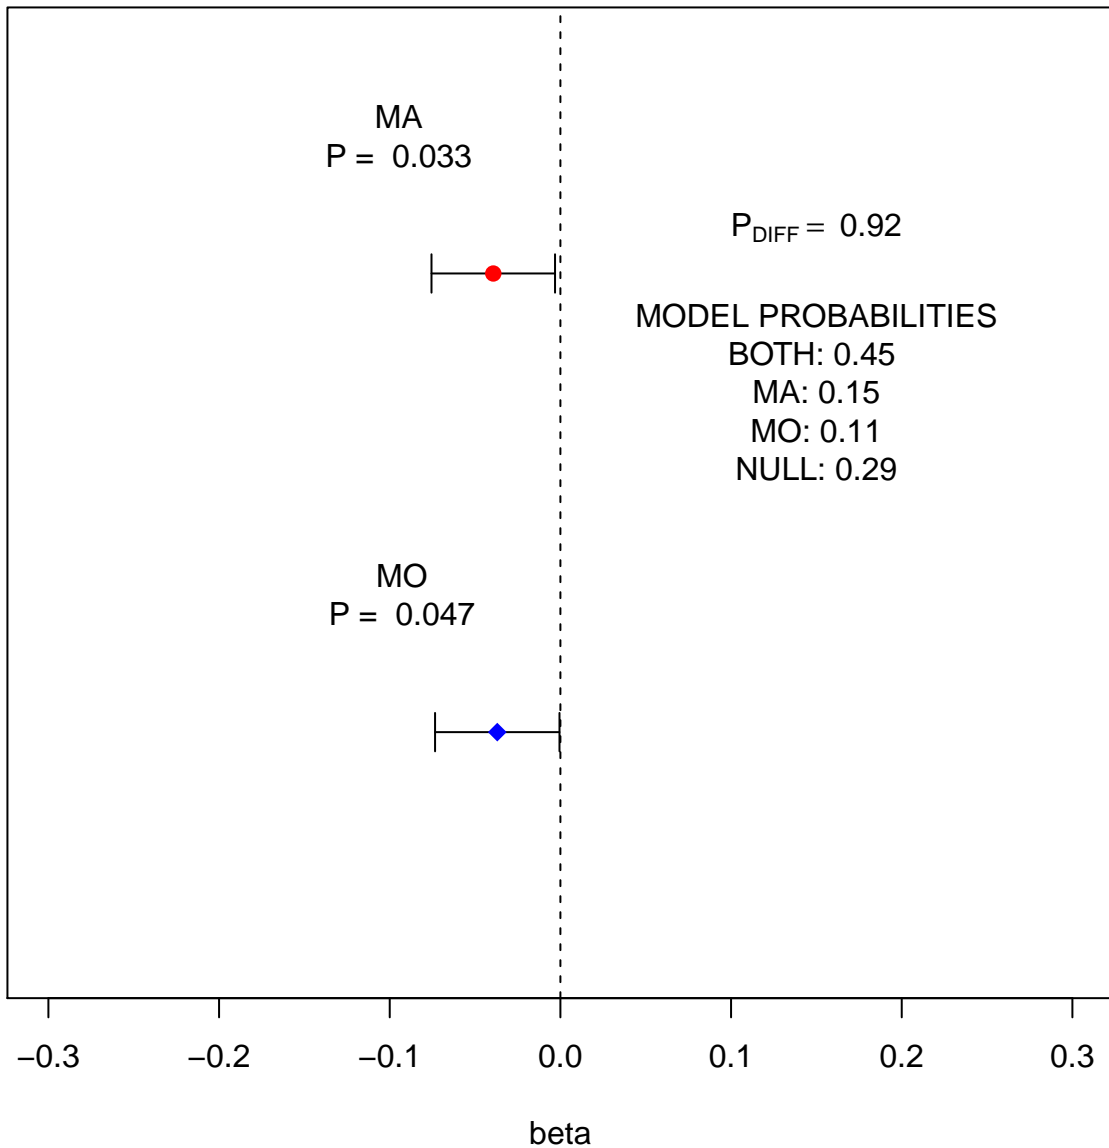



near RP11-573J24.1 (rs4739105)

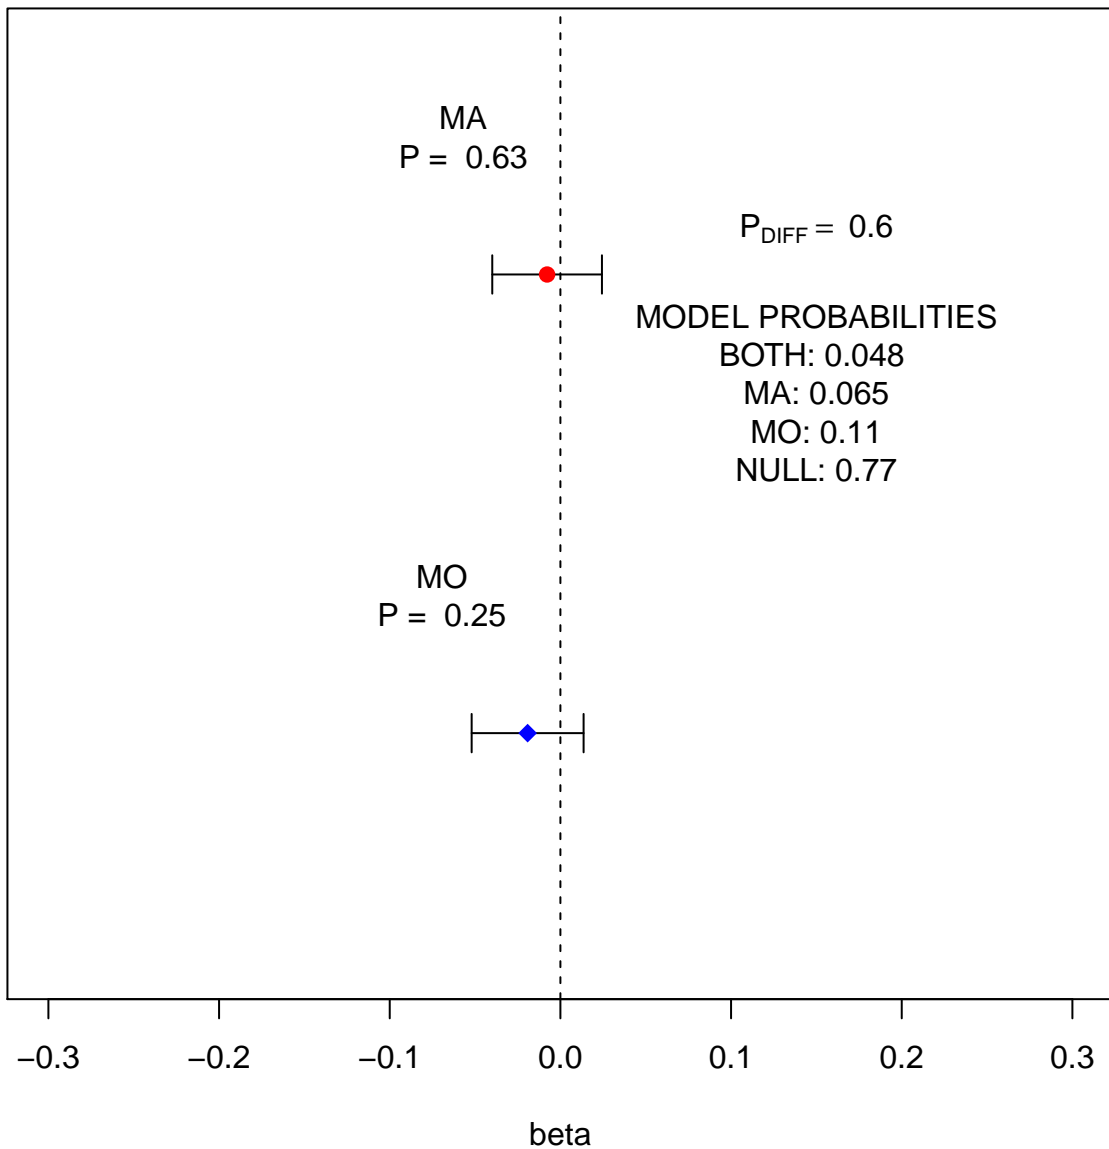

# NFIB (rs580845)

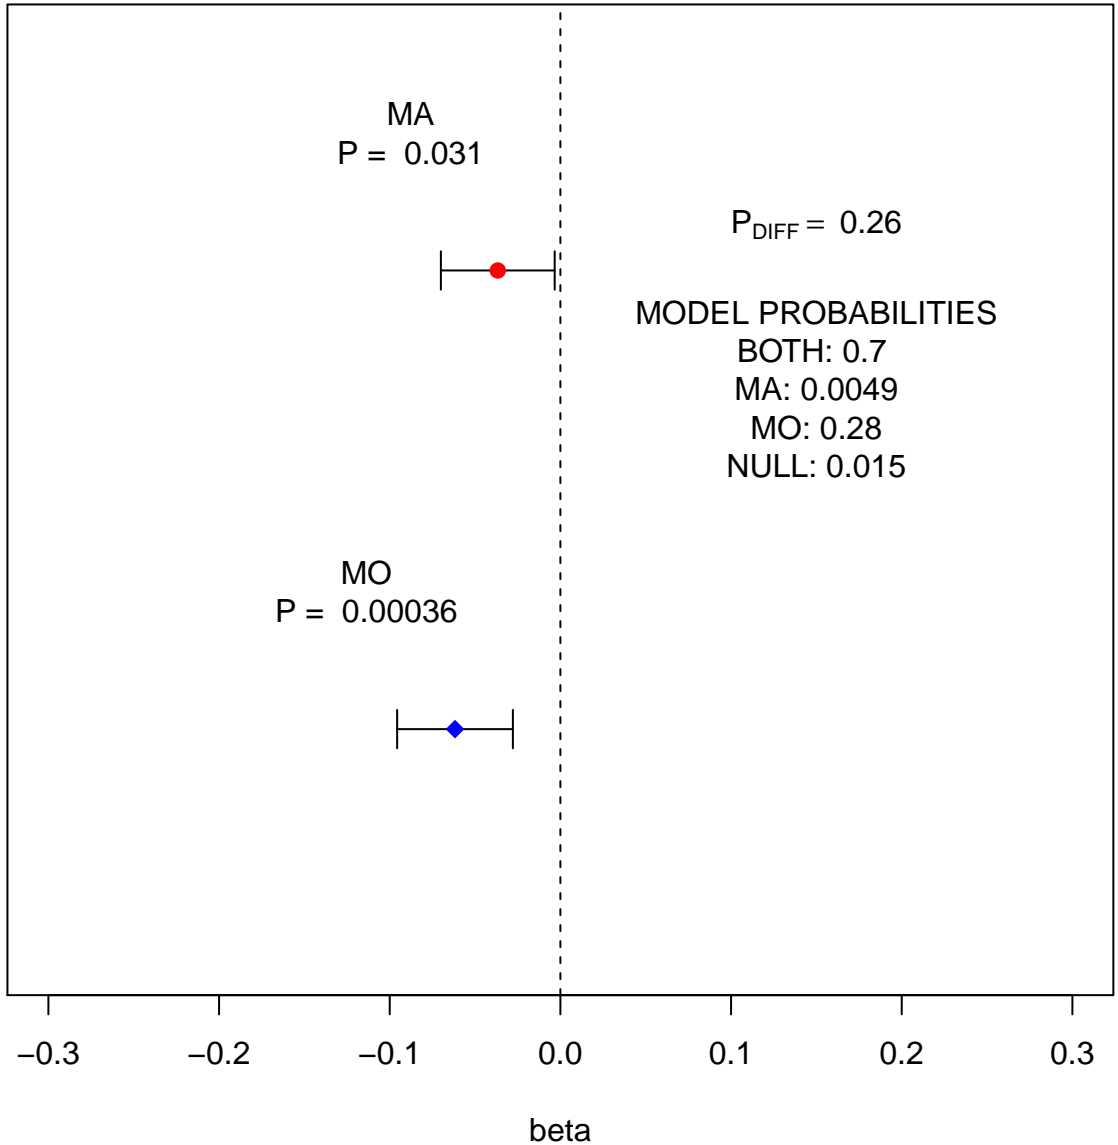

# near RP11-373A6.1 (rs10156578)

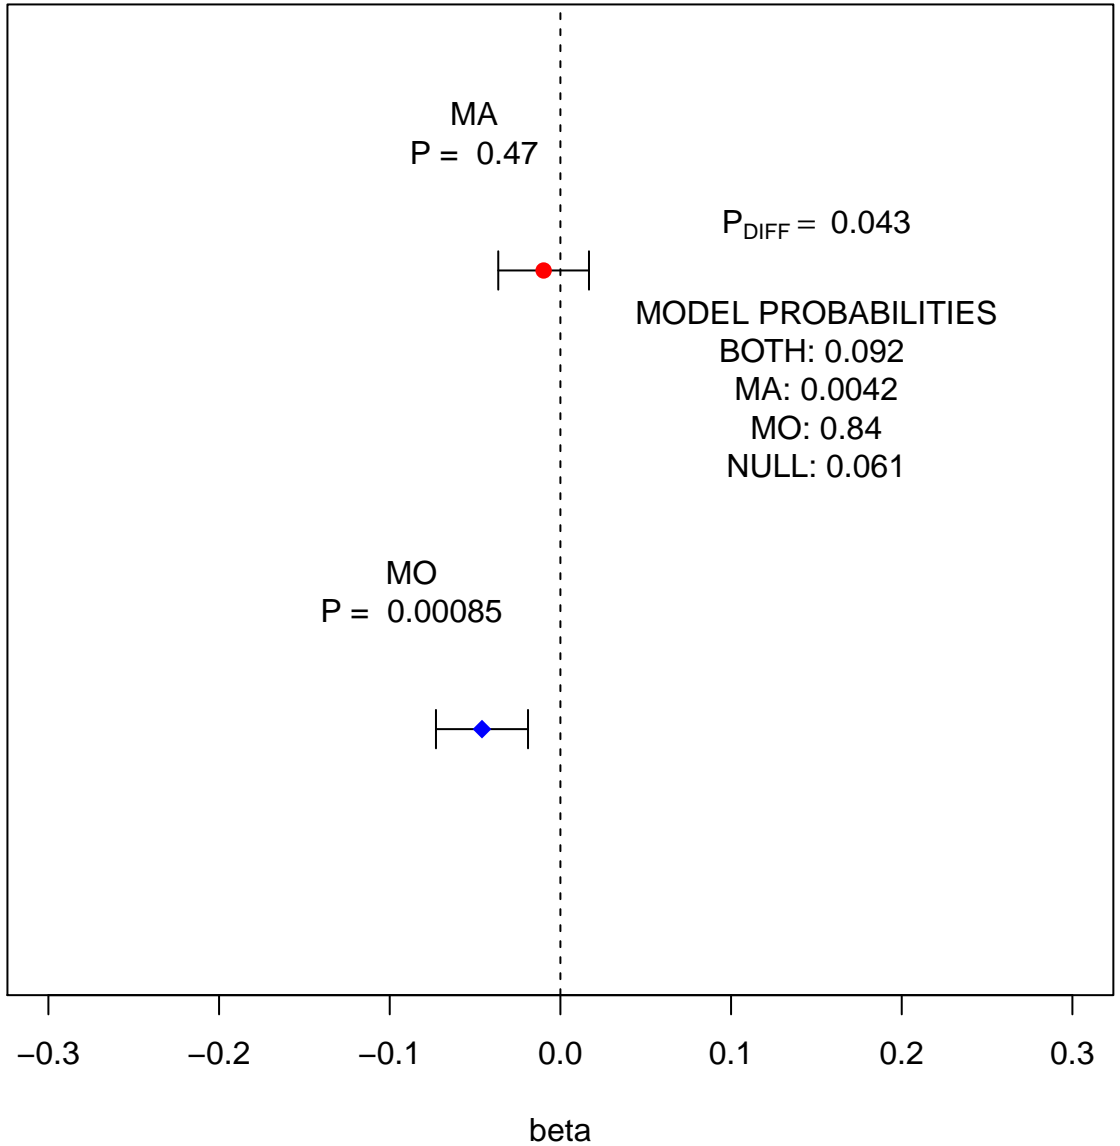

# TJP2 (rs7034179)

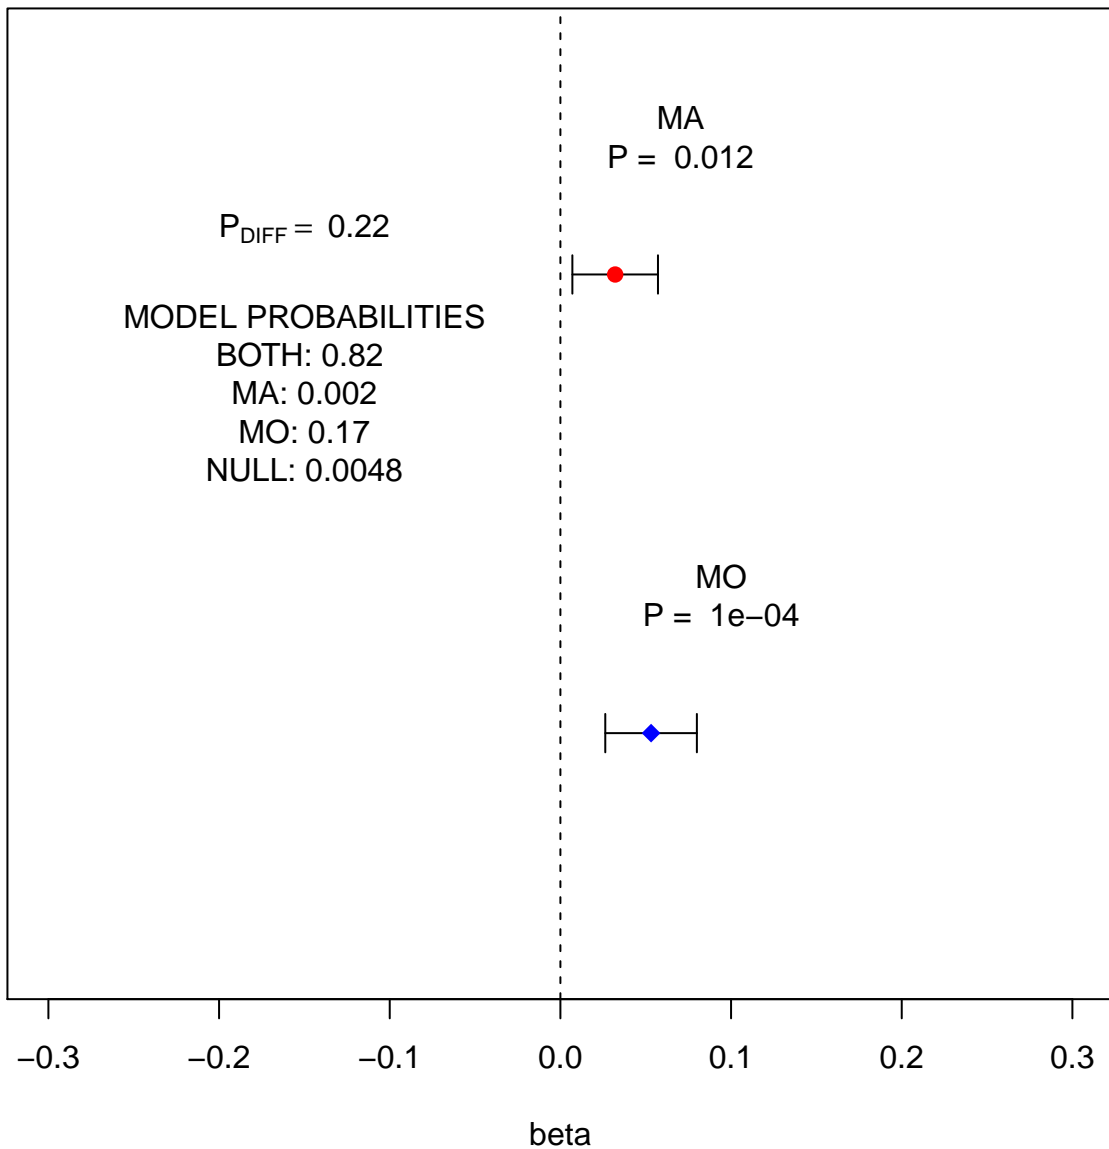

# ZNF462 (rs17723637)

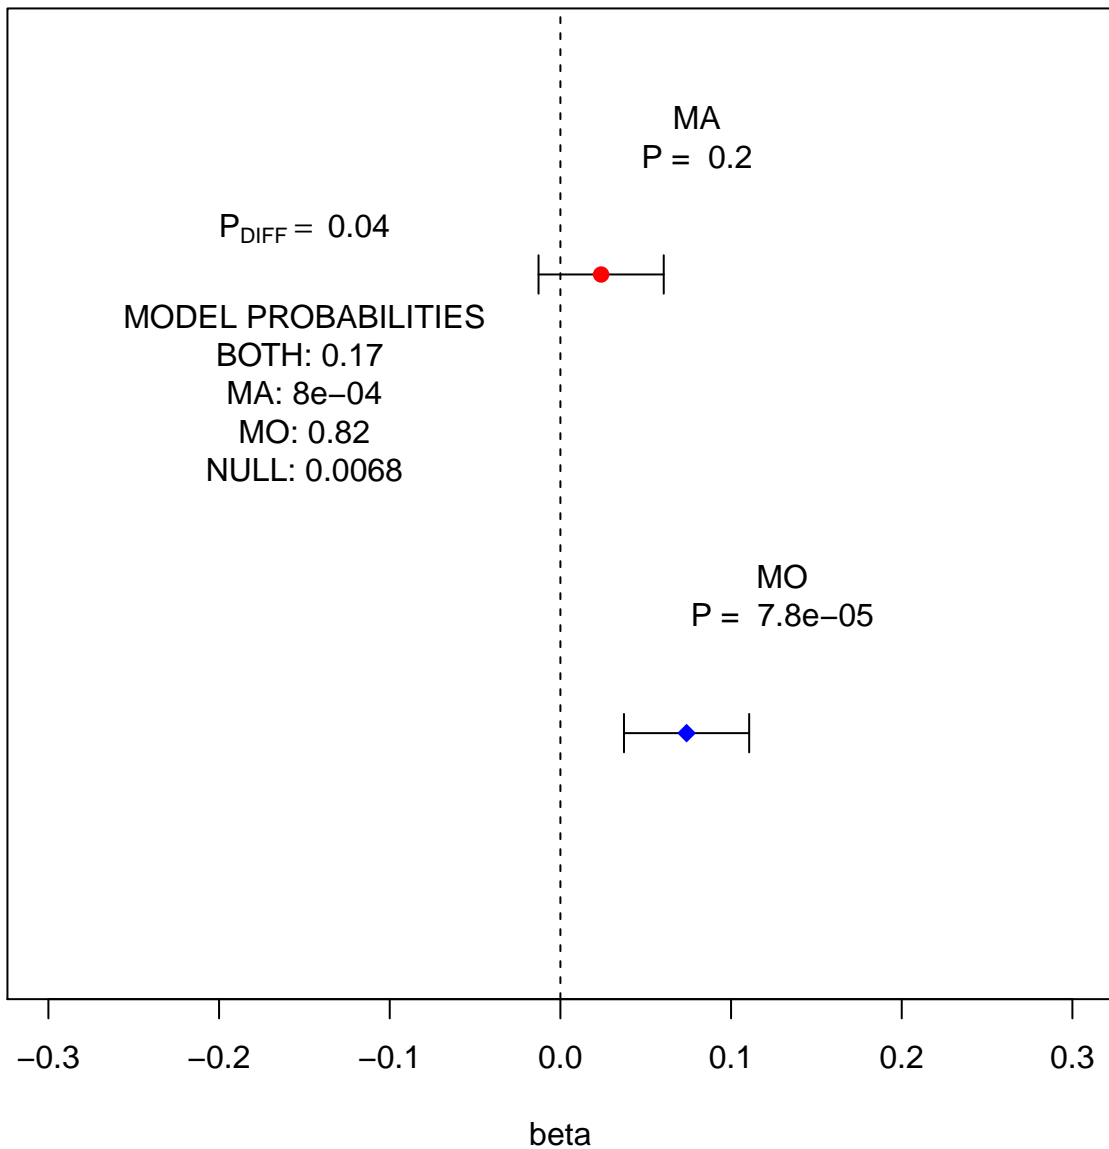

# ASTN2 (rs3891689)

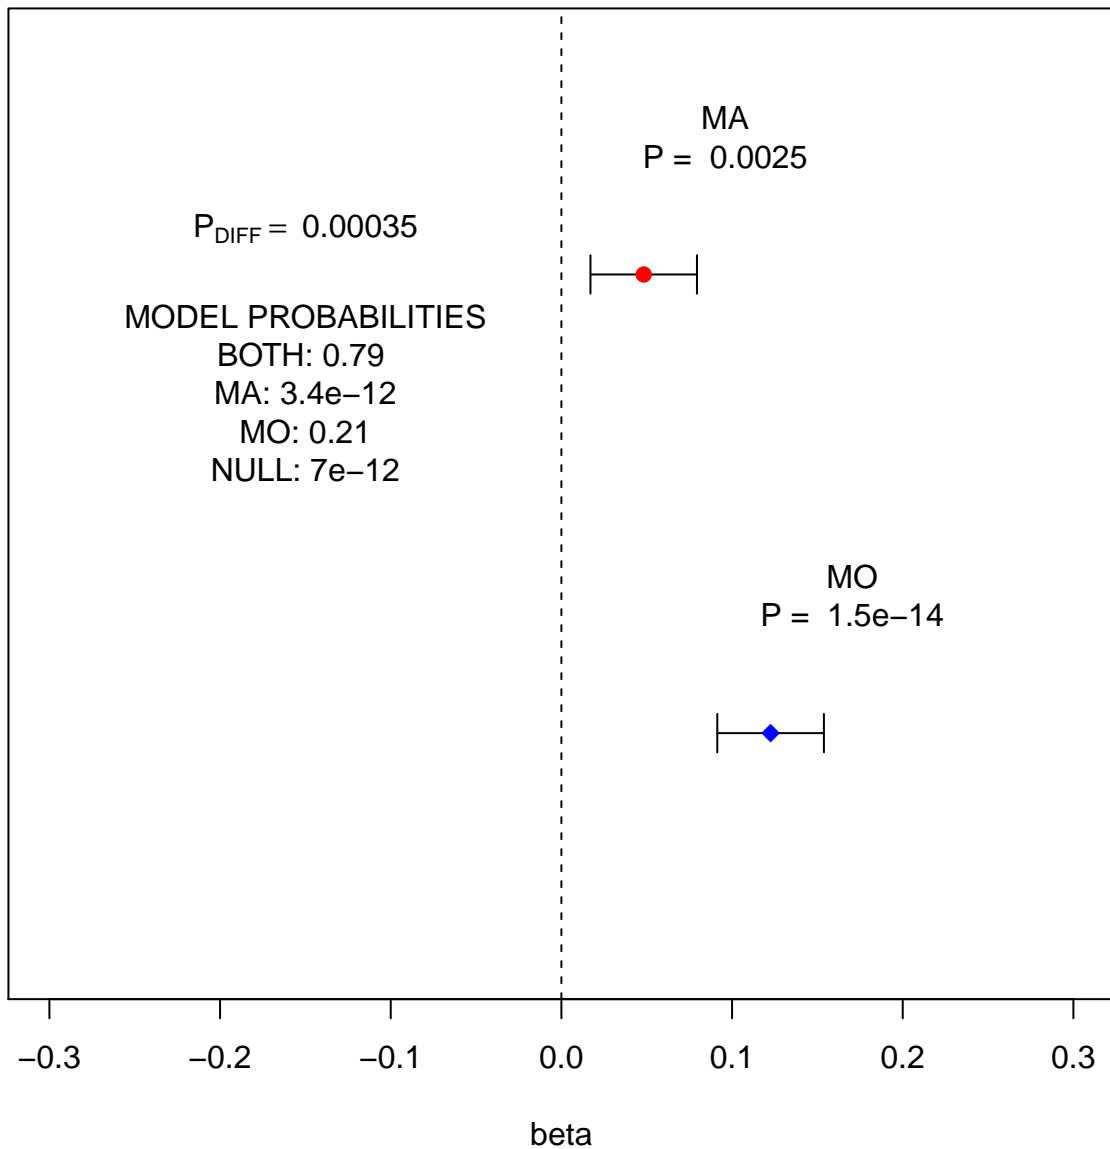

# near EHMT1 (rs4278223)

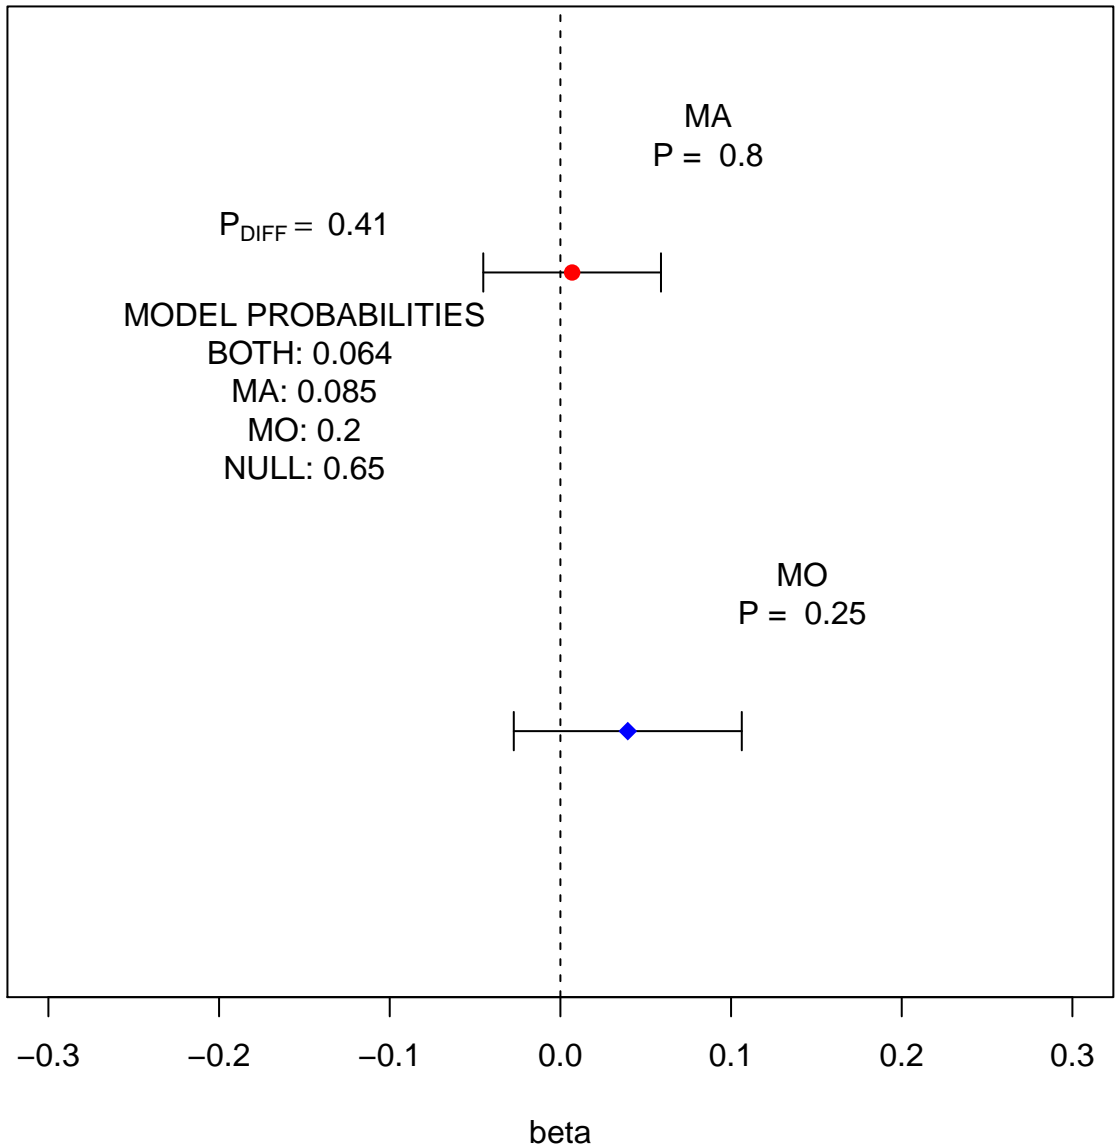

# near RNA5SP299 (rs7916911)

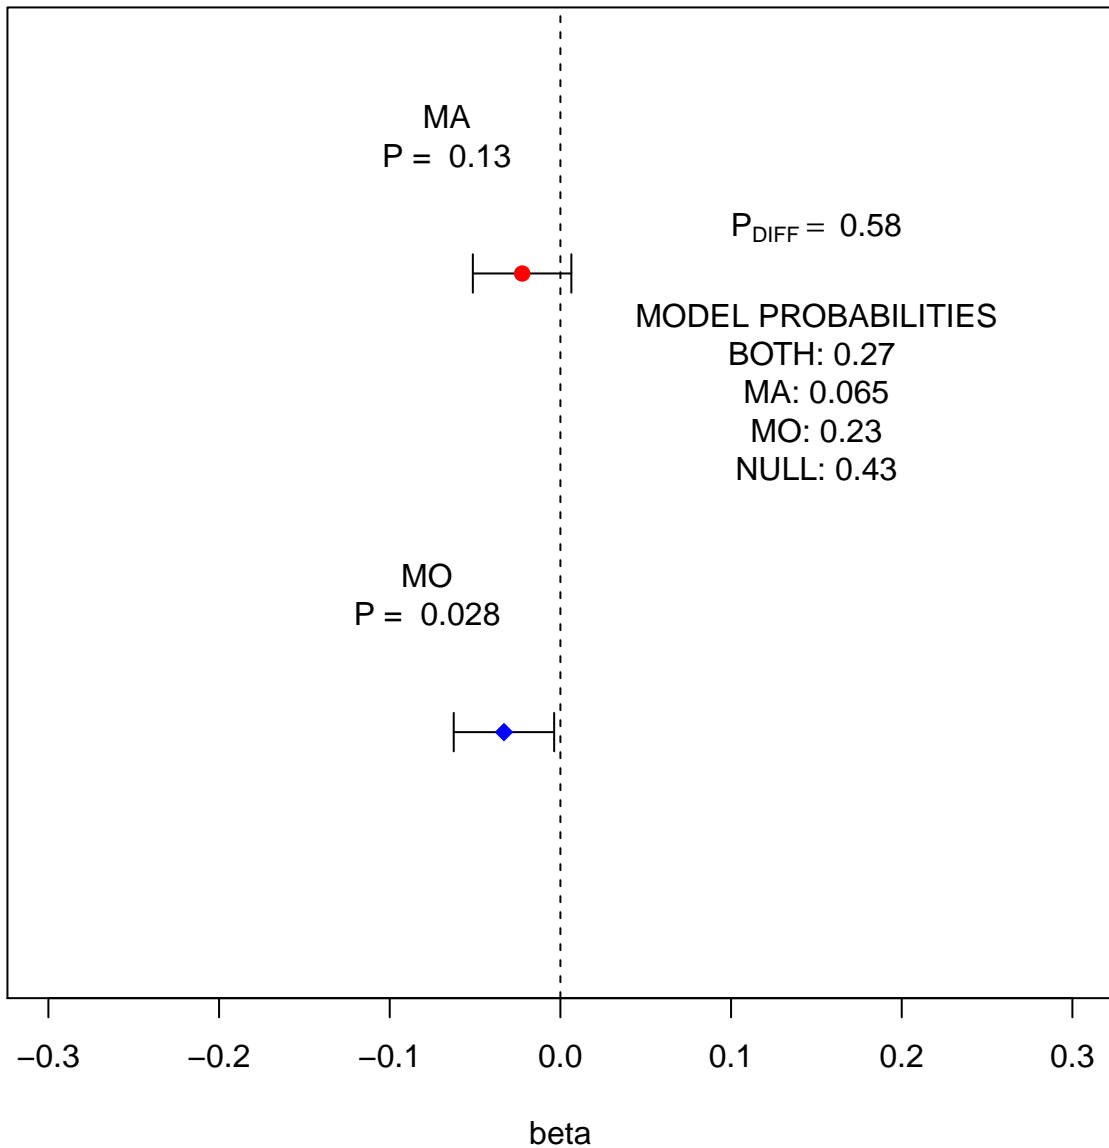



# near MLLT10 (rs10828247)

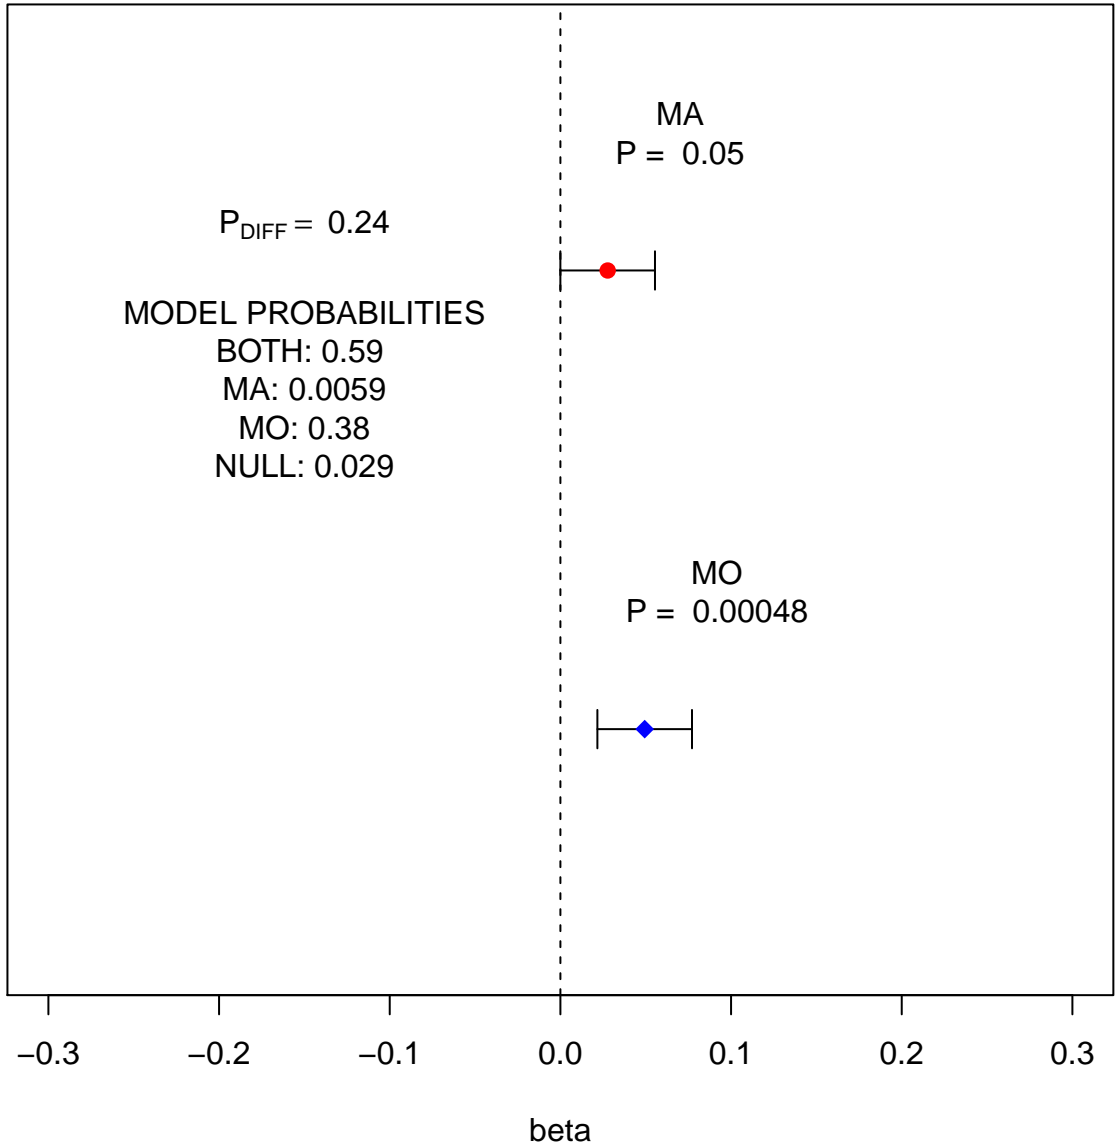

# PLCE1 (rs2274224)

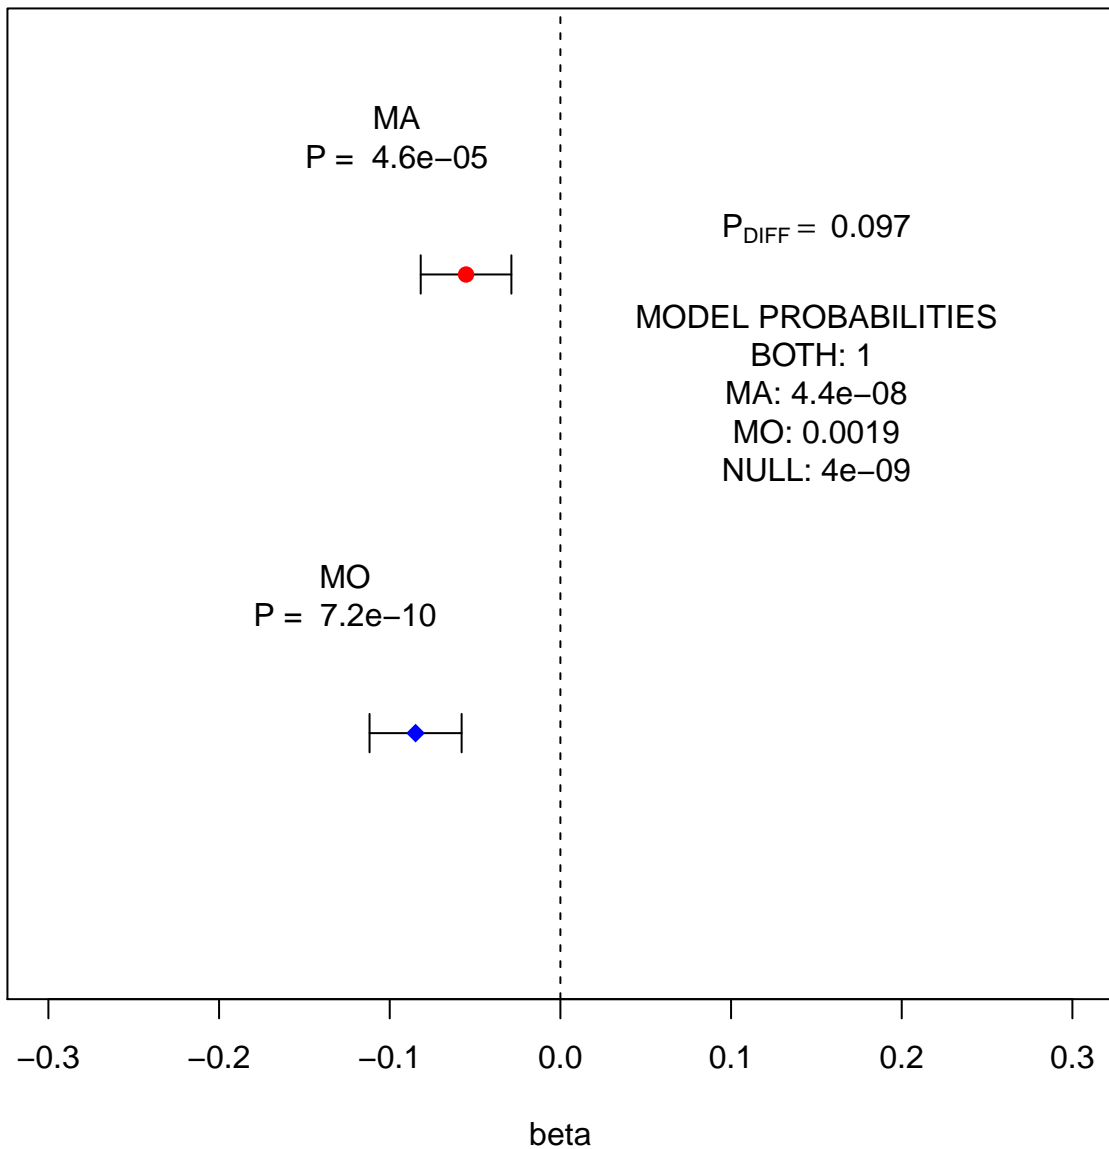

# HPSE2 (rs12260159)

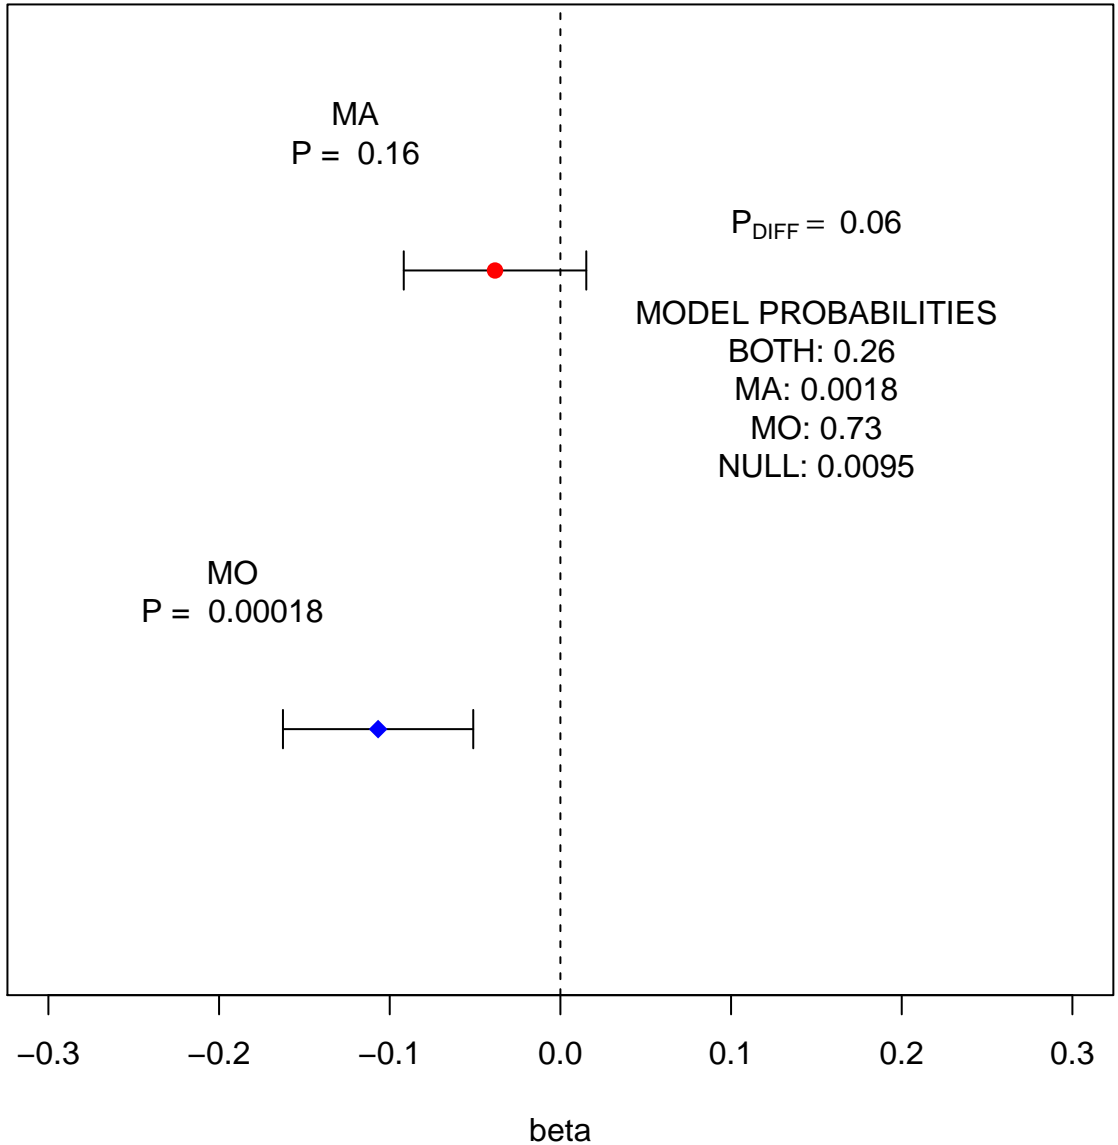

# CNNM2 (rs12260436)

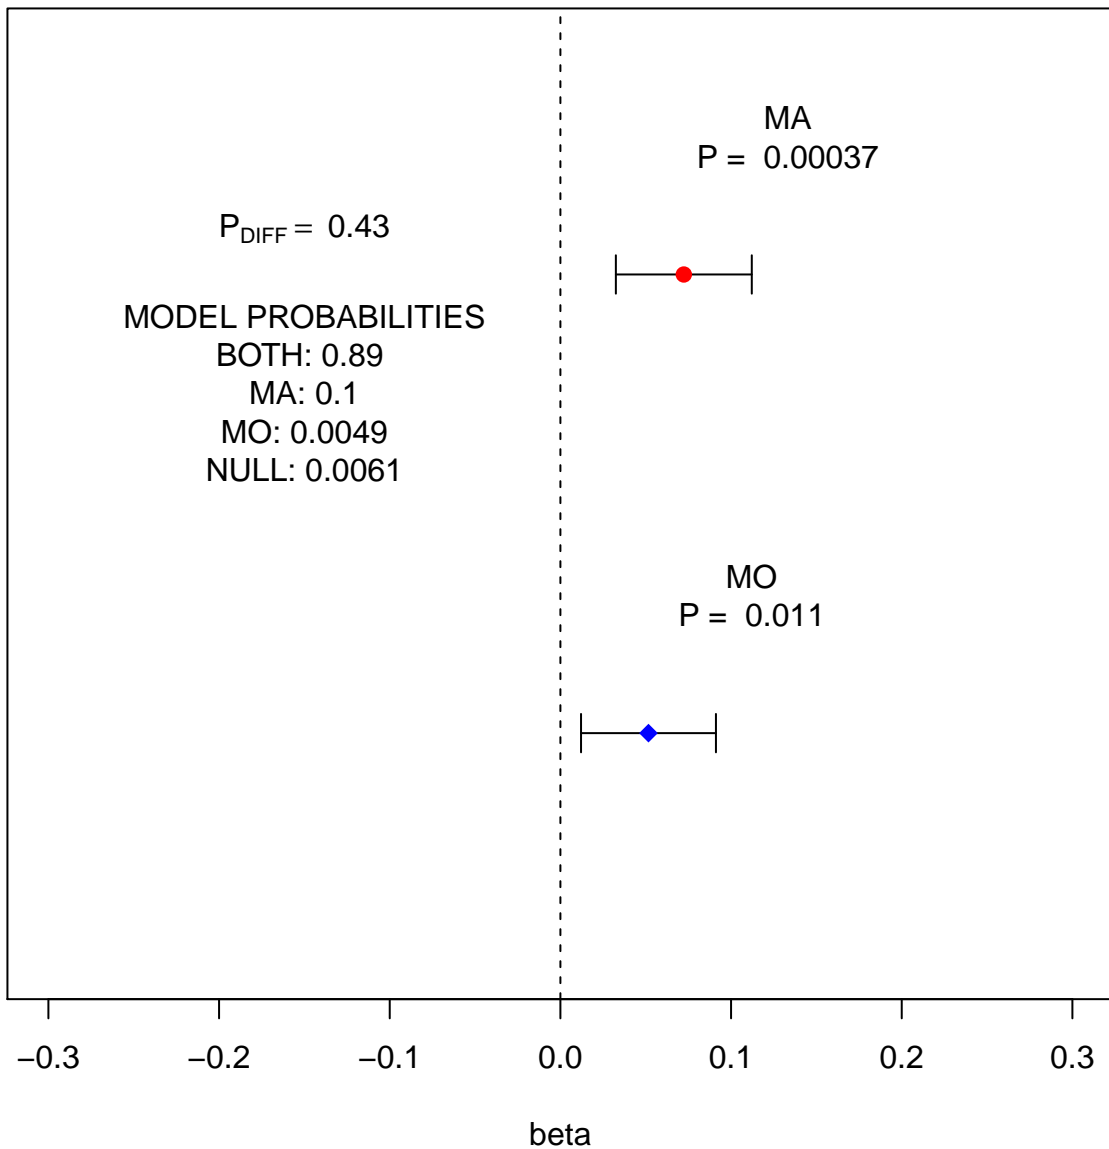

# RBM20 (rs869432)

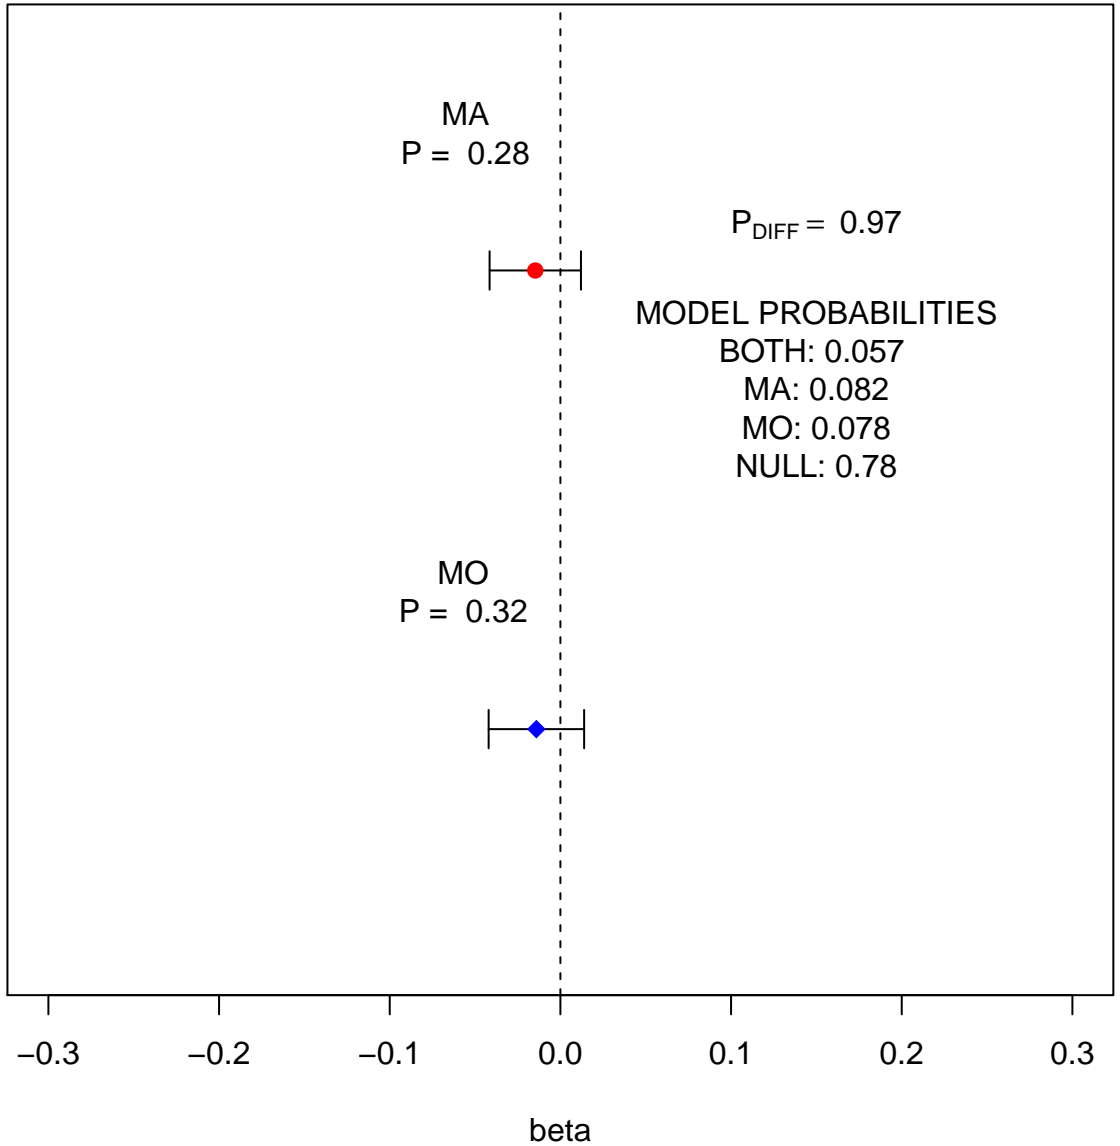

# HTRA1 (rs2672592)

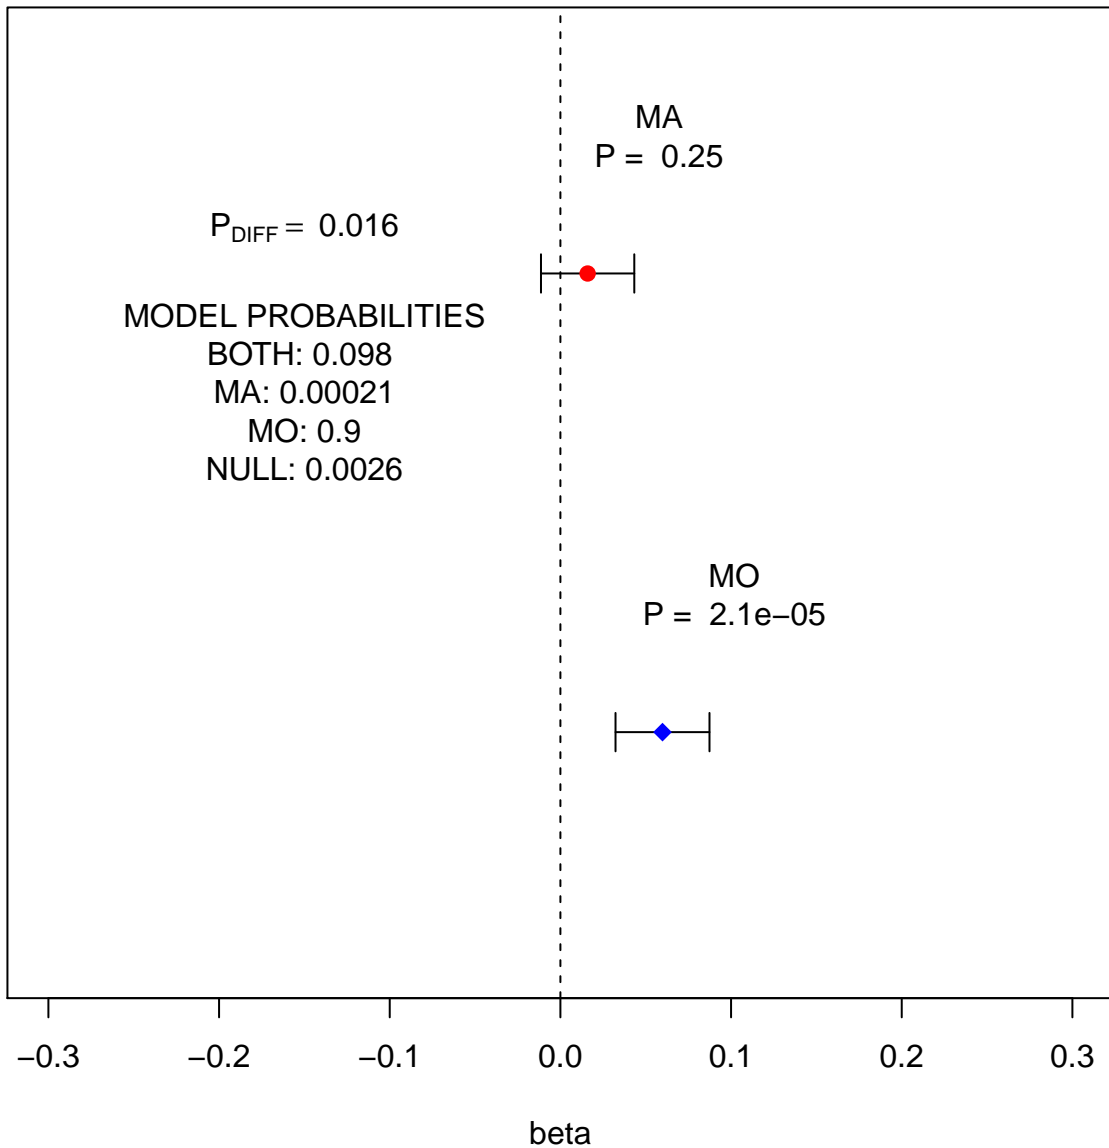

# near GPR26 (rs11248546)

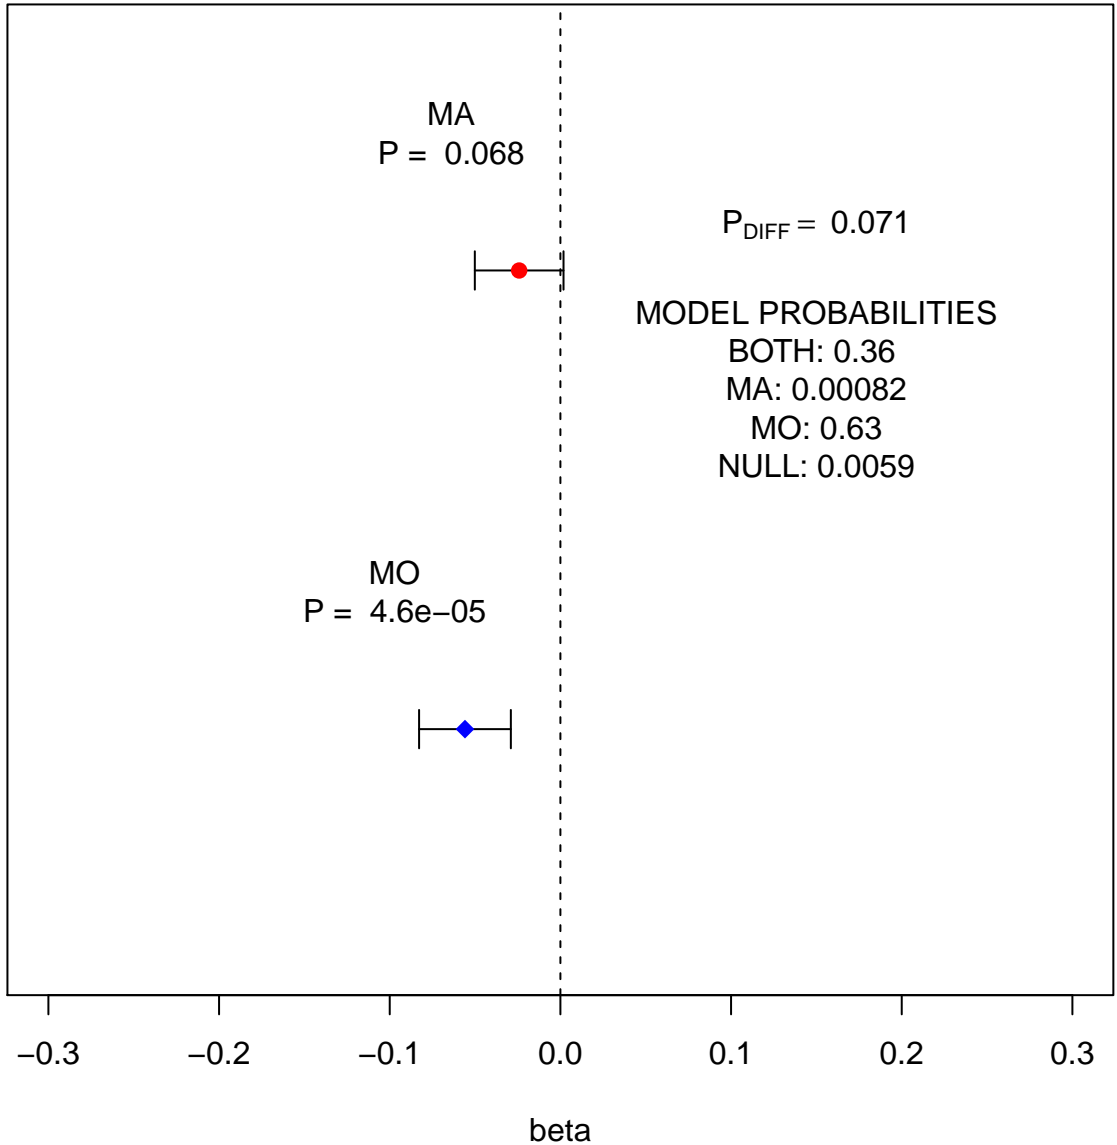

# INPP5A (rs200314499)

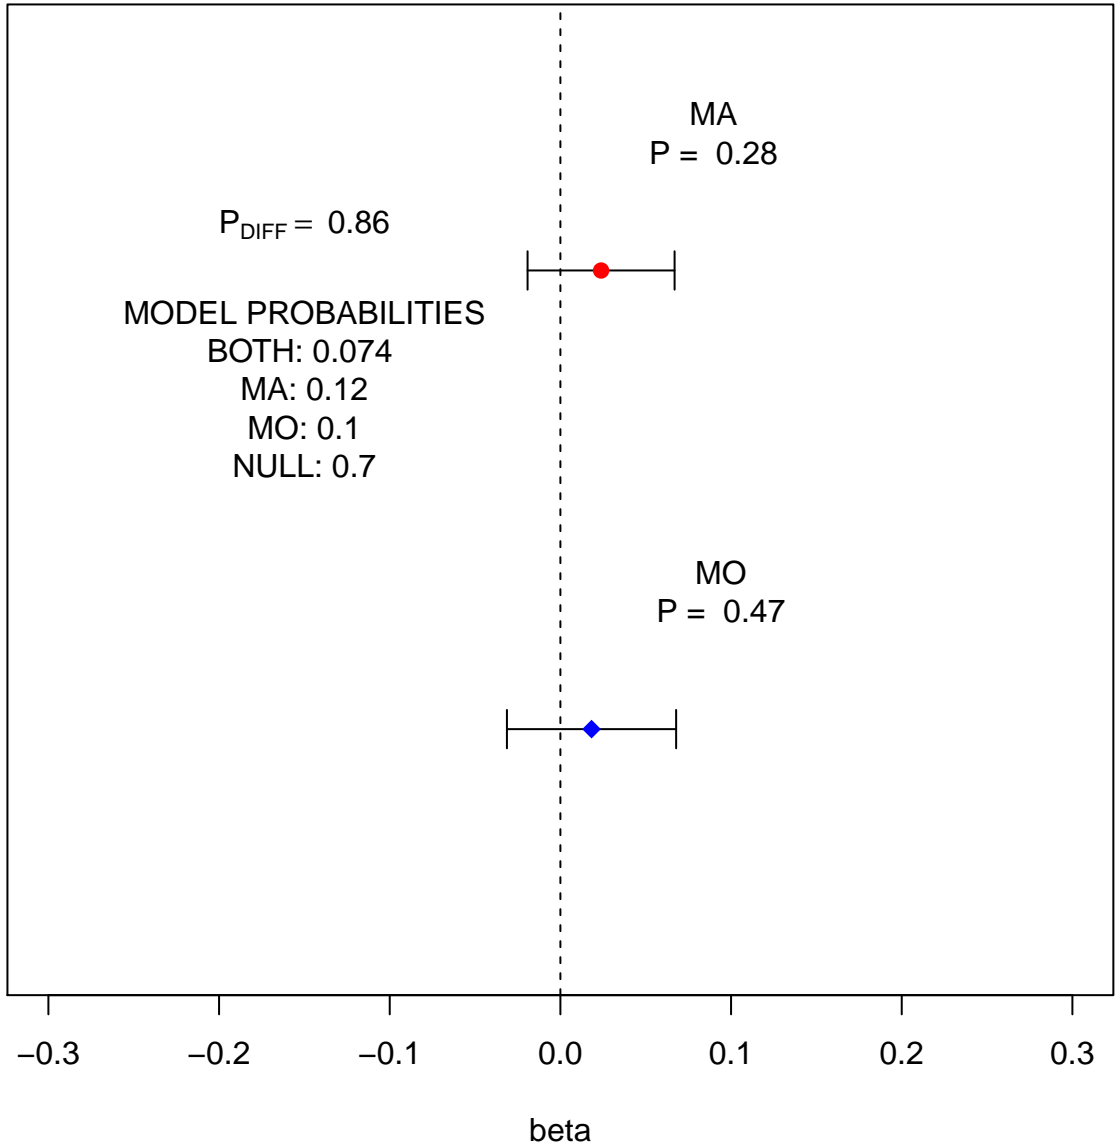



# MRGPRES (rs12295710)

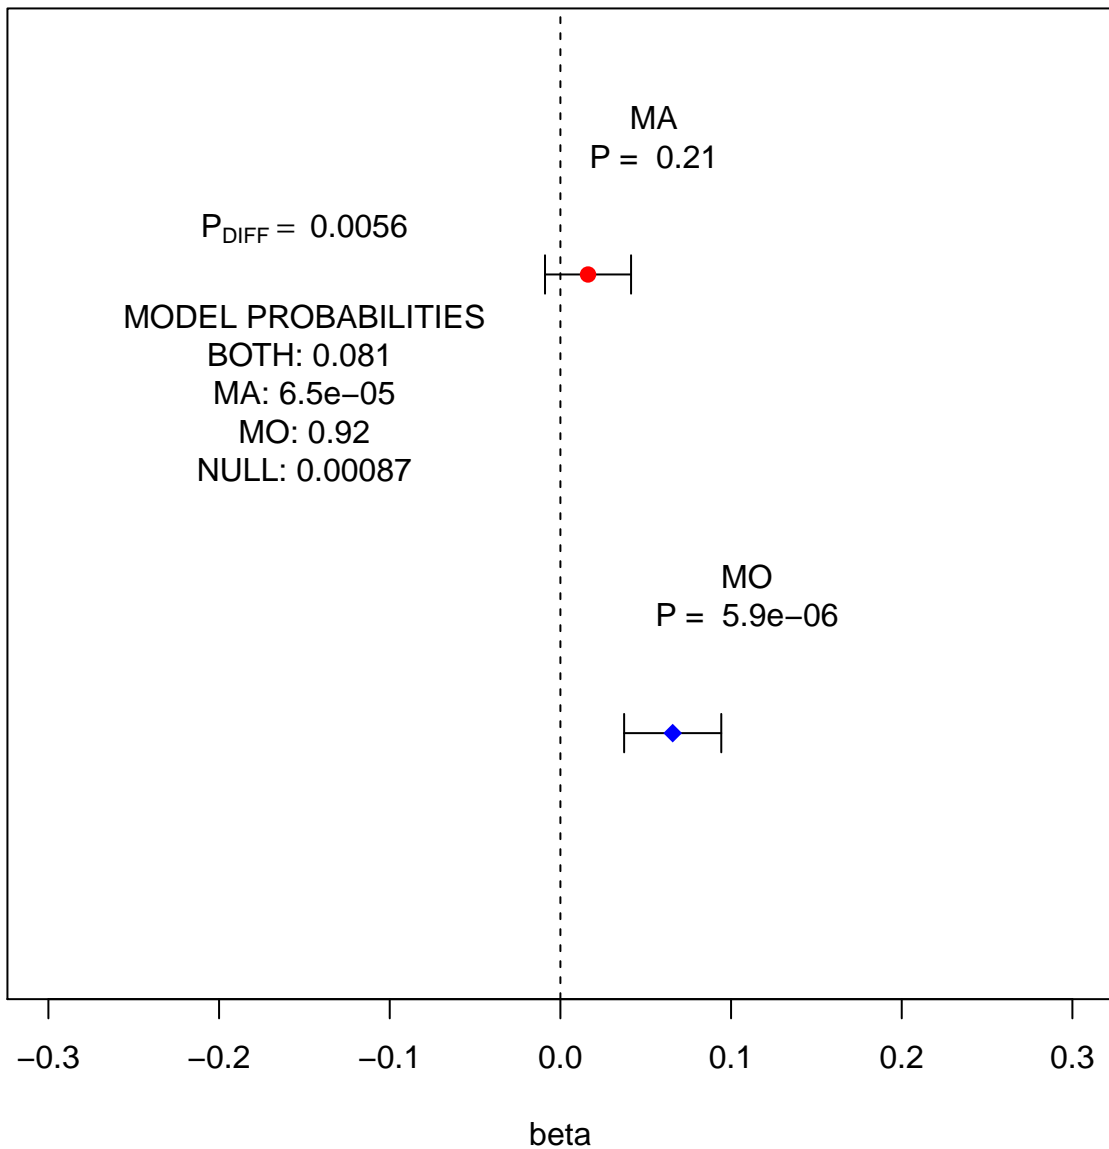

# MRVI1 (rs4910165)

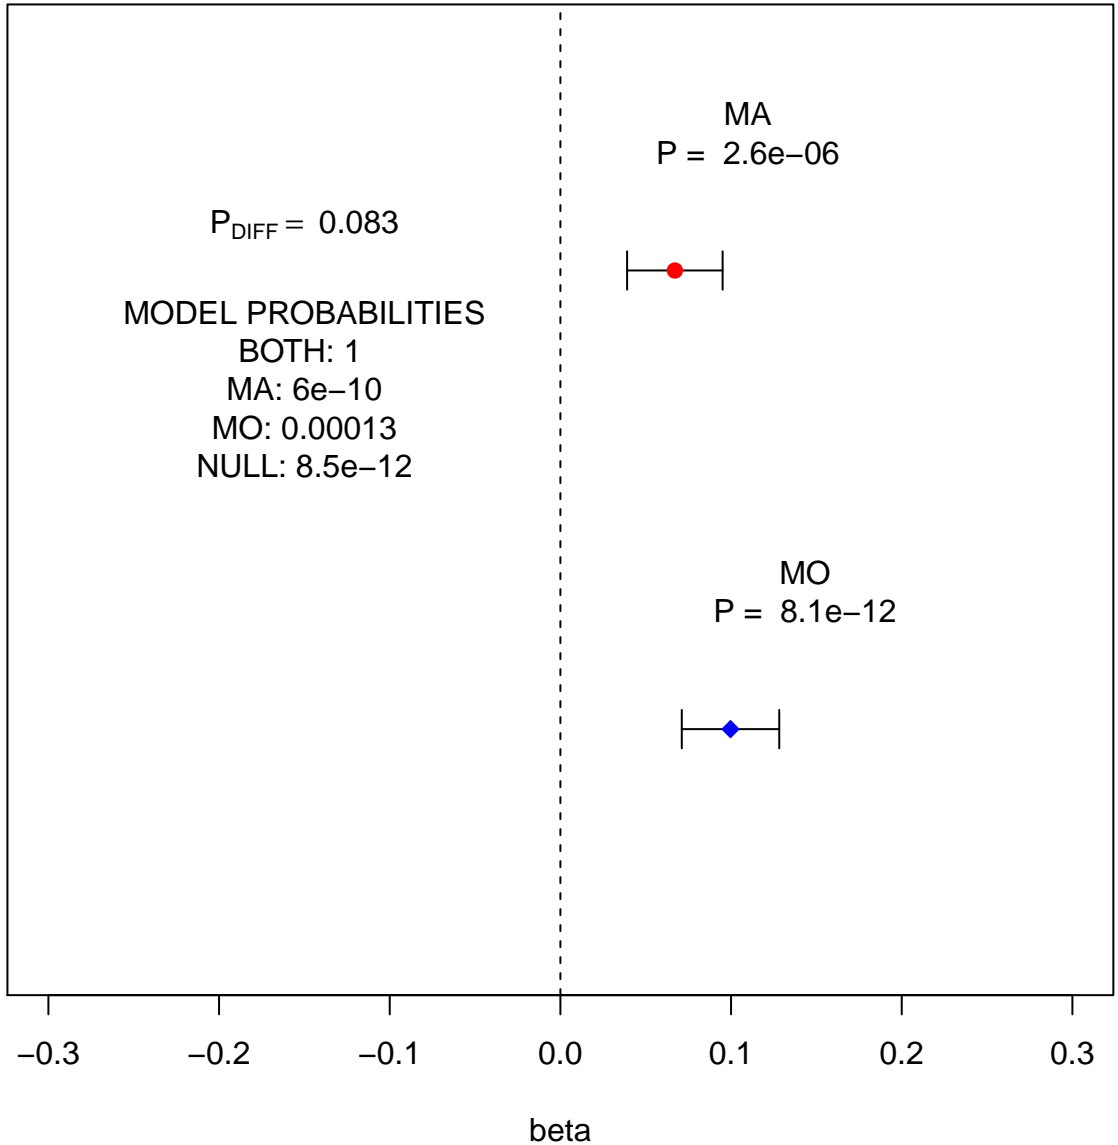

# near INSC (rs1003194)

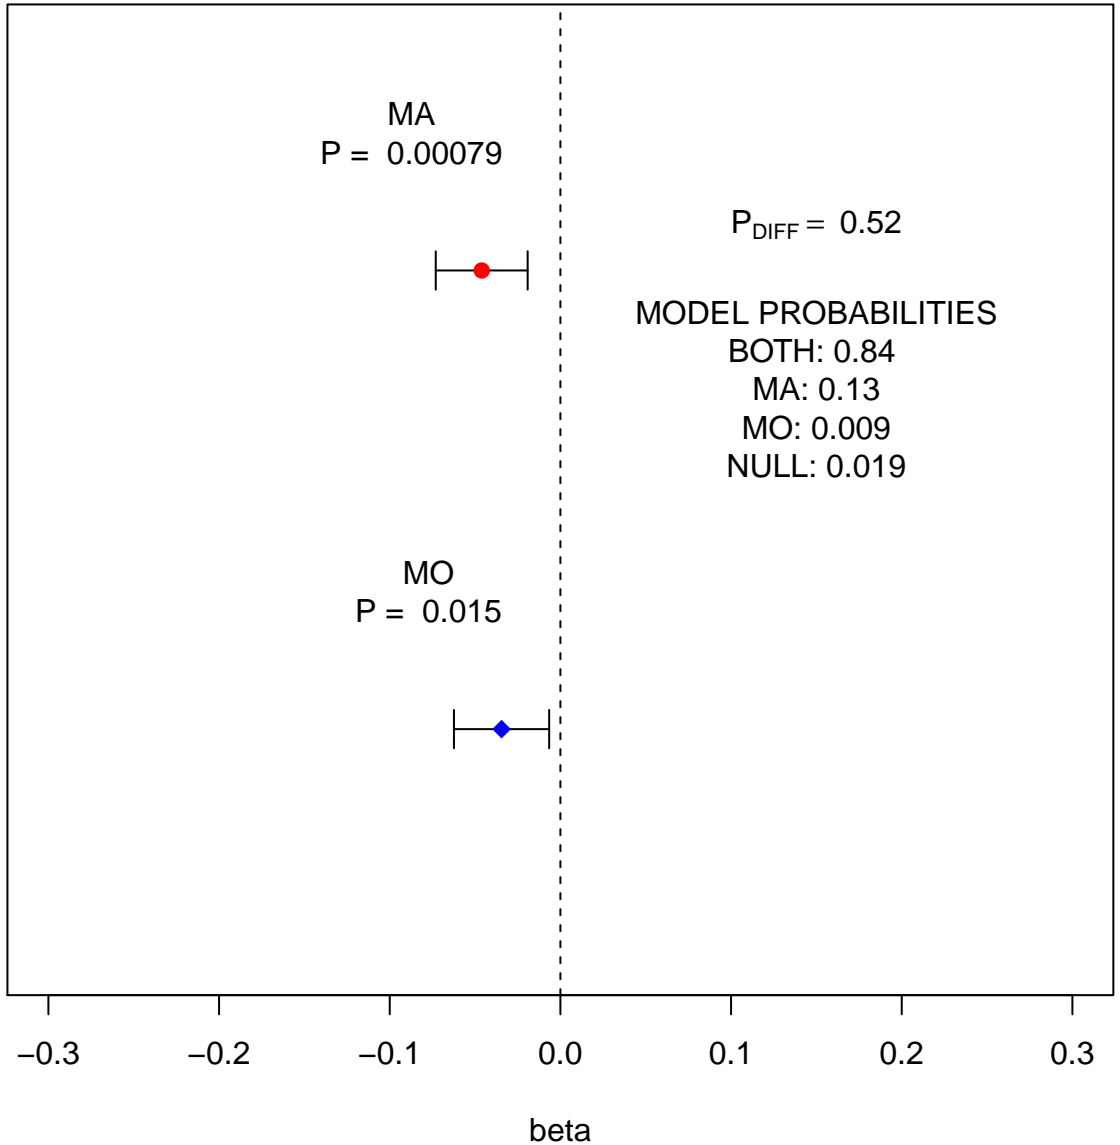

# MPPED2 (rs11031122)

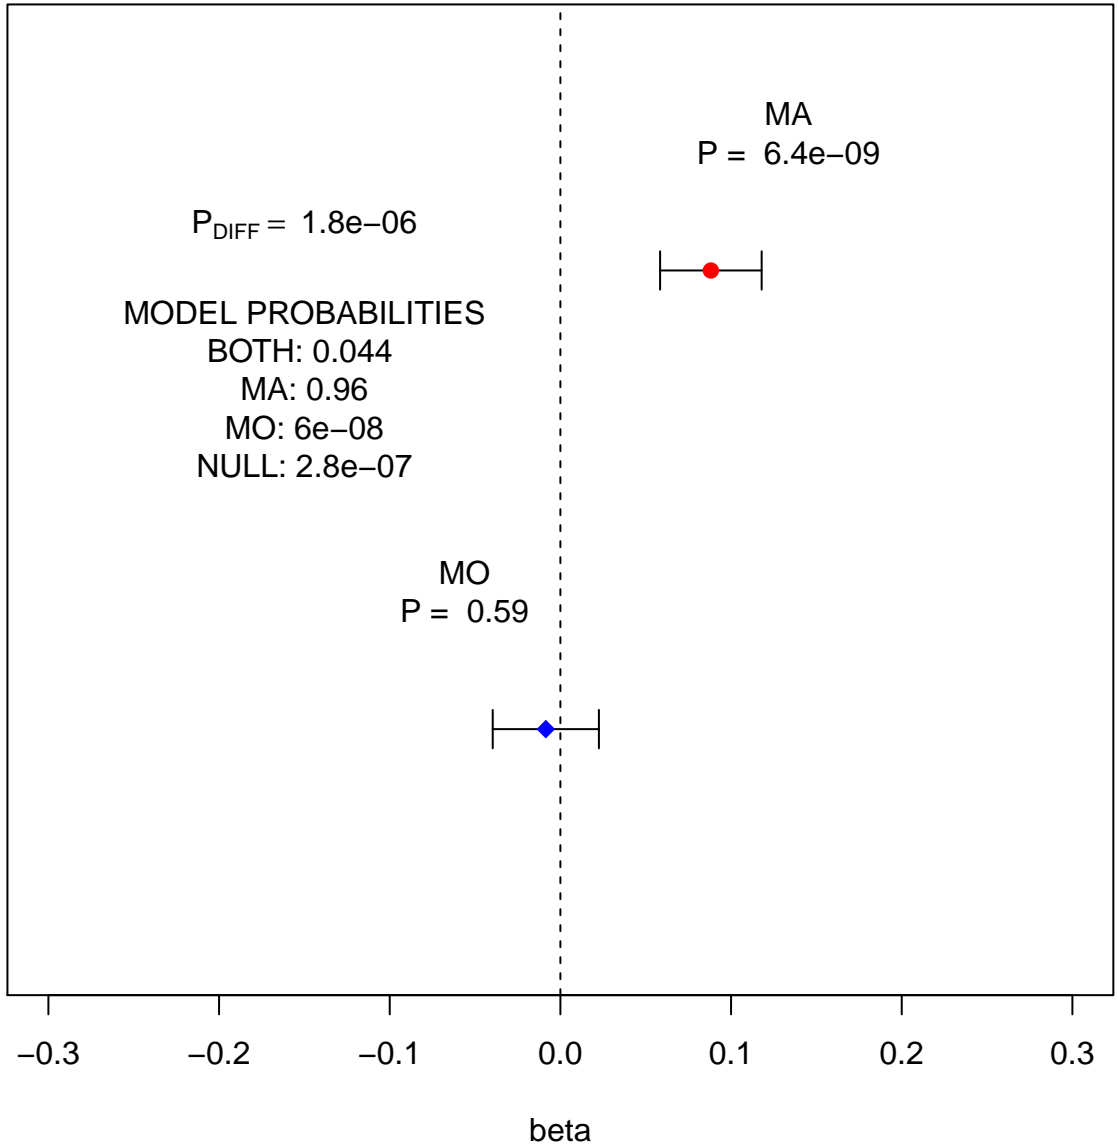

# AMBRA1 (rs7932866)

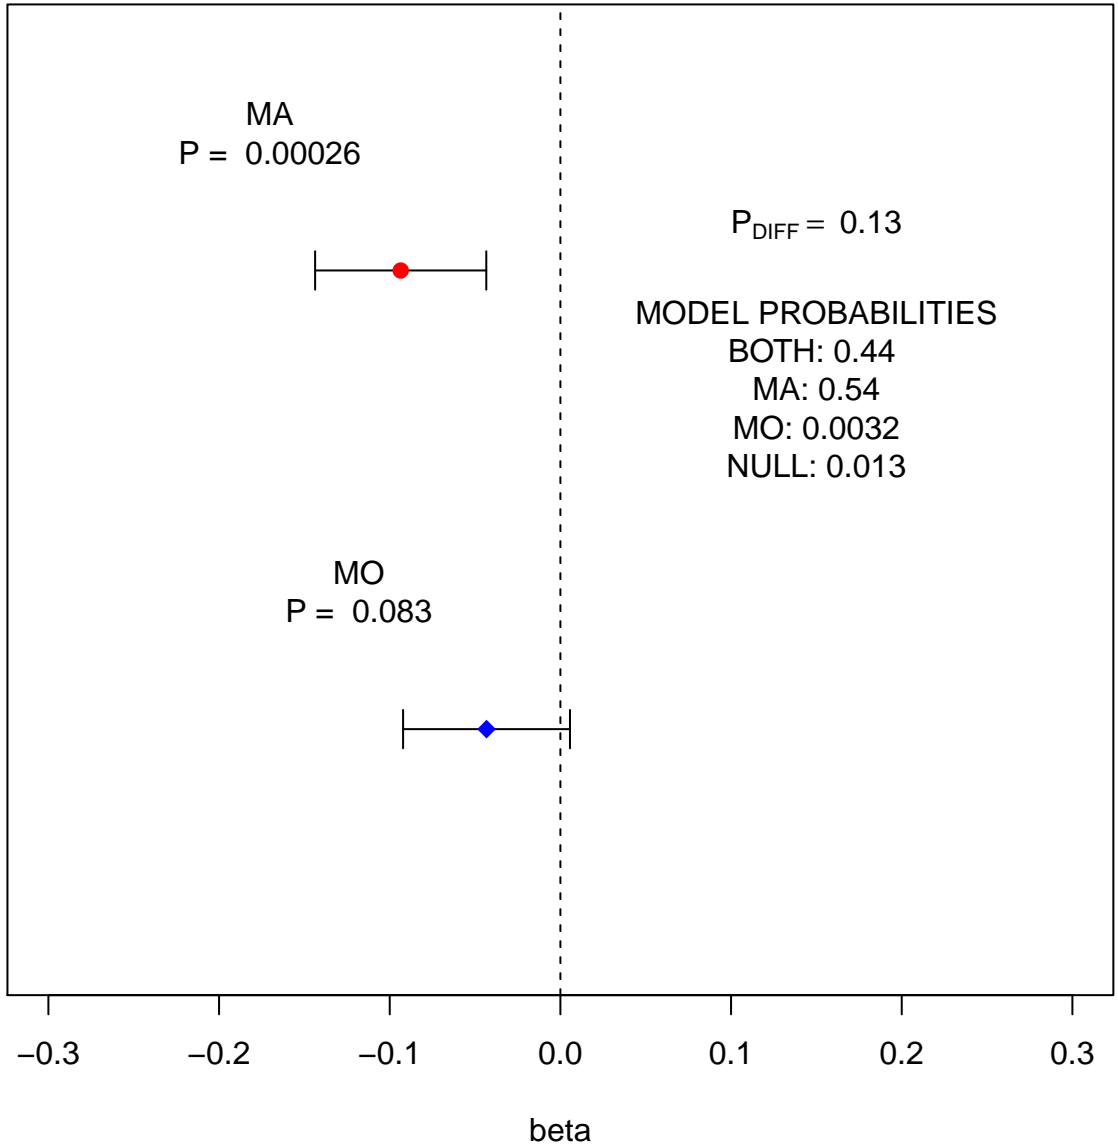

# near RAB3IL1 (rs12787928)

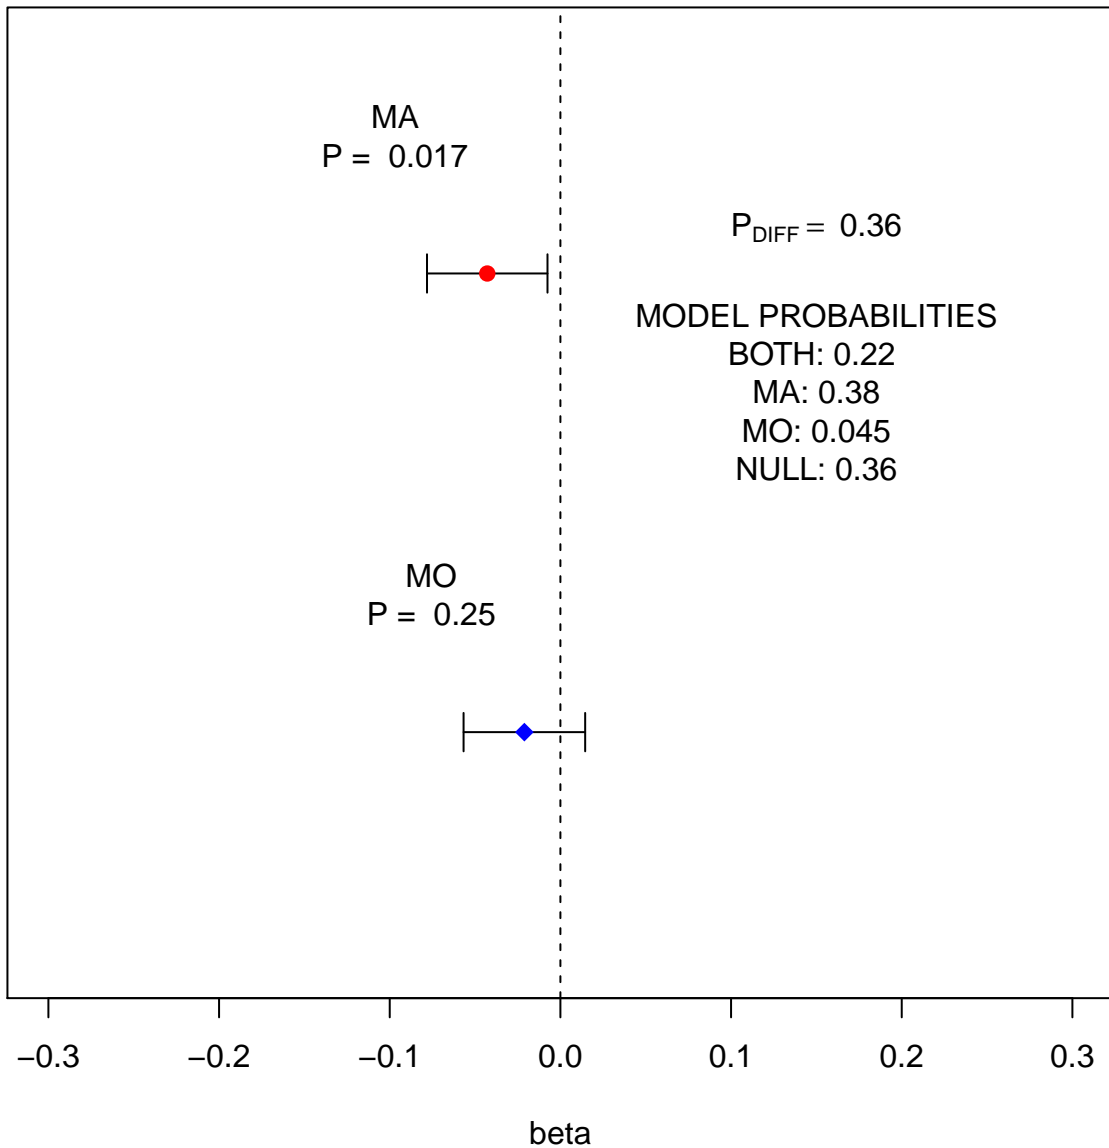

# RBM14-RBM4|RBM4 (rs566673)

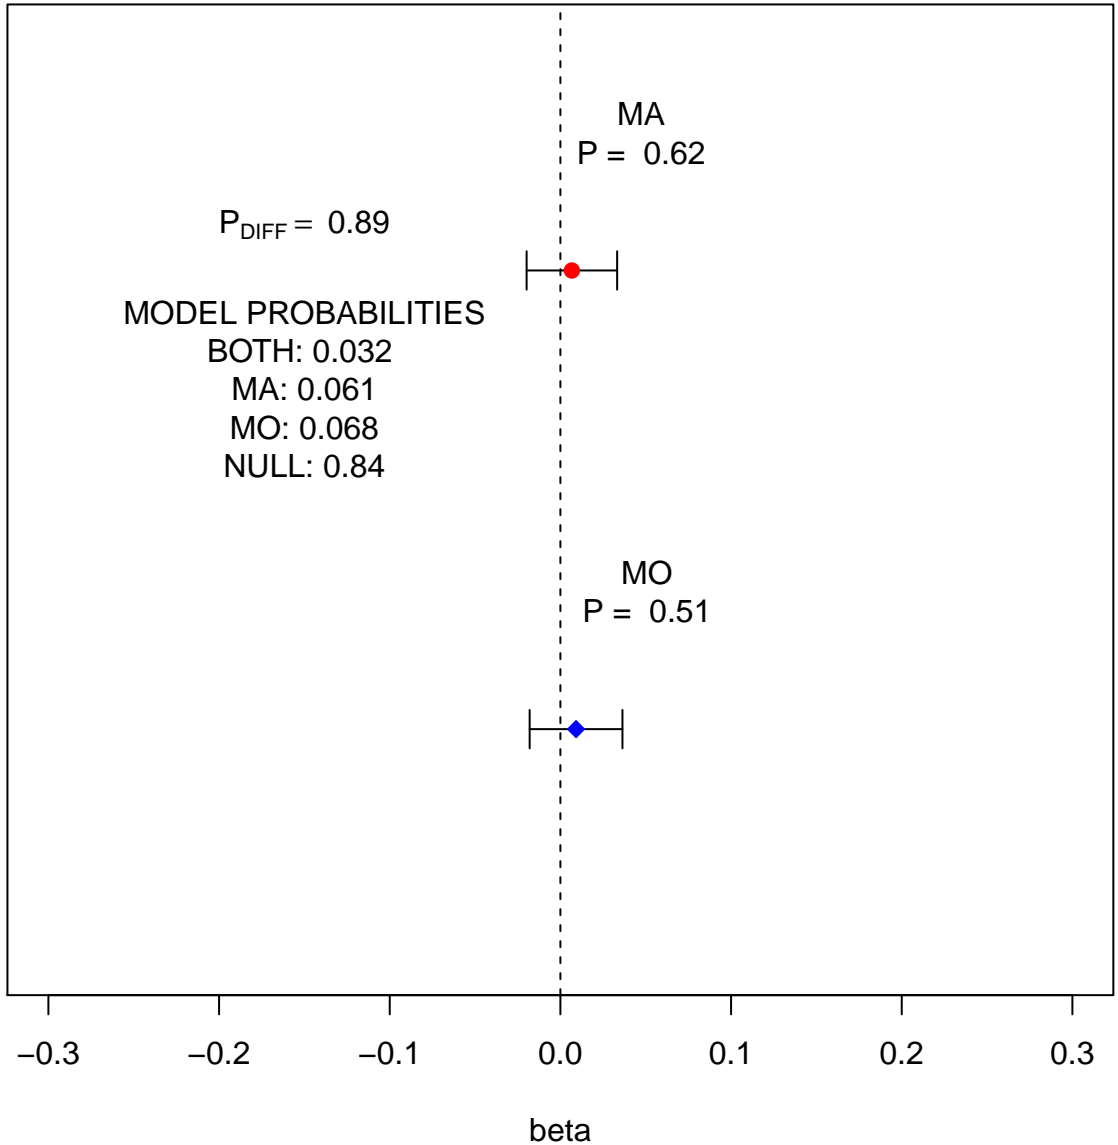

# YAP1 (rs12226331)

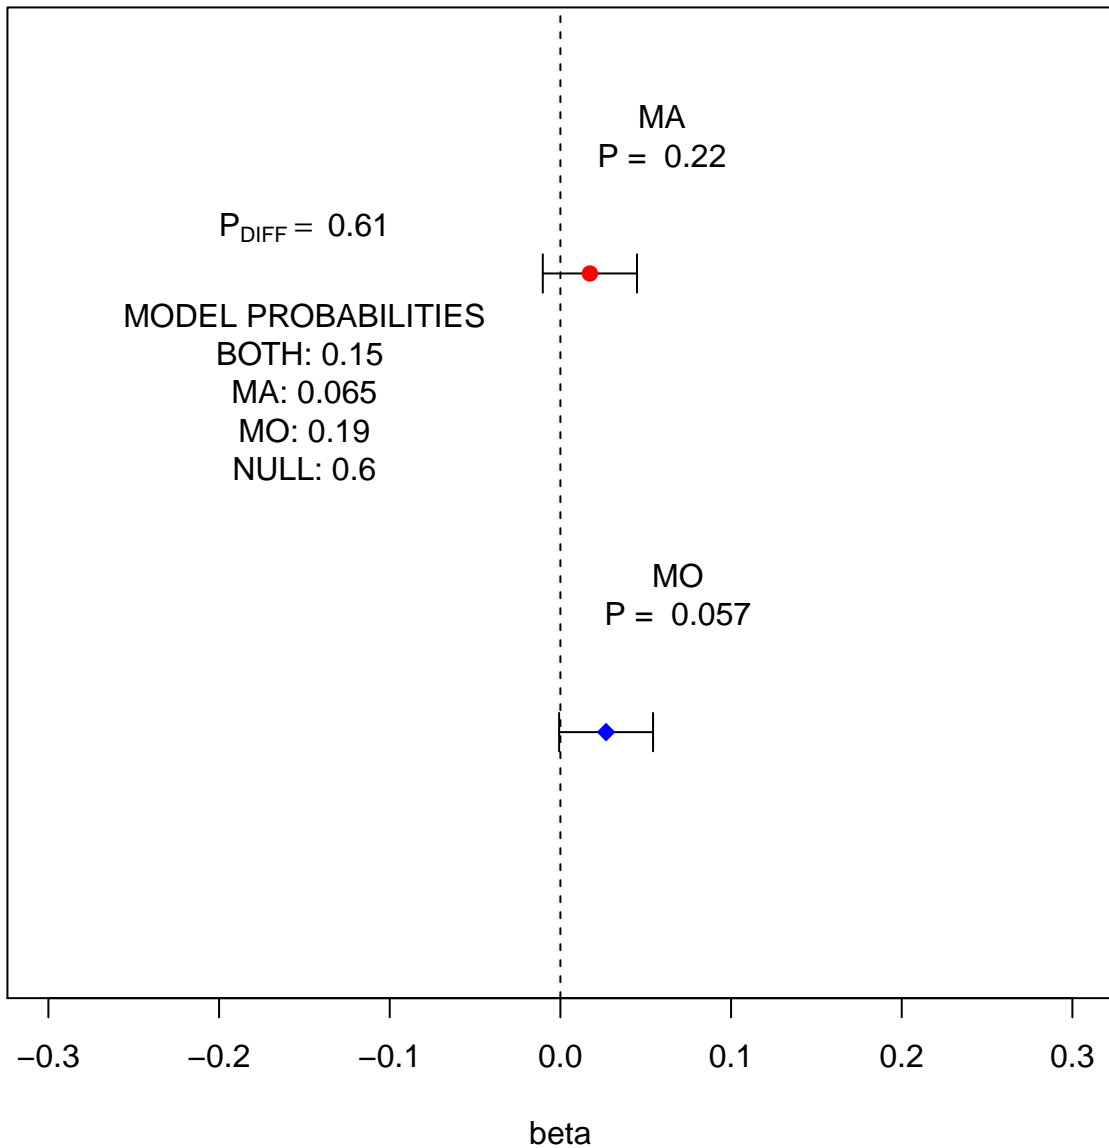



# near SPATA19 (rs10894756)

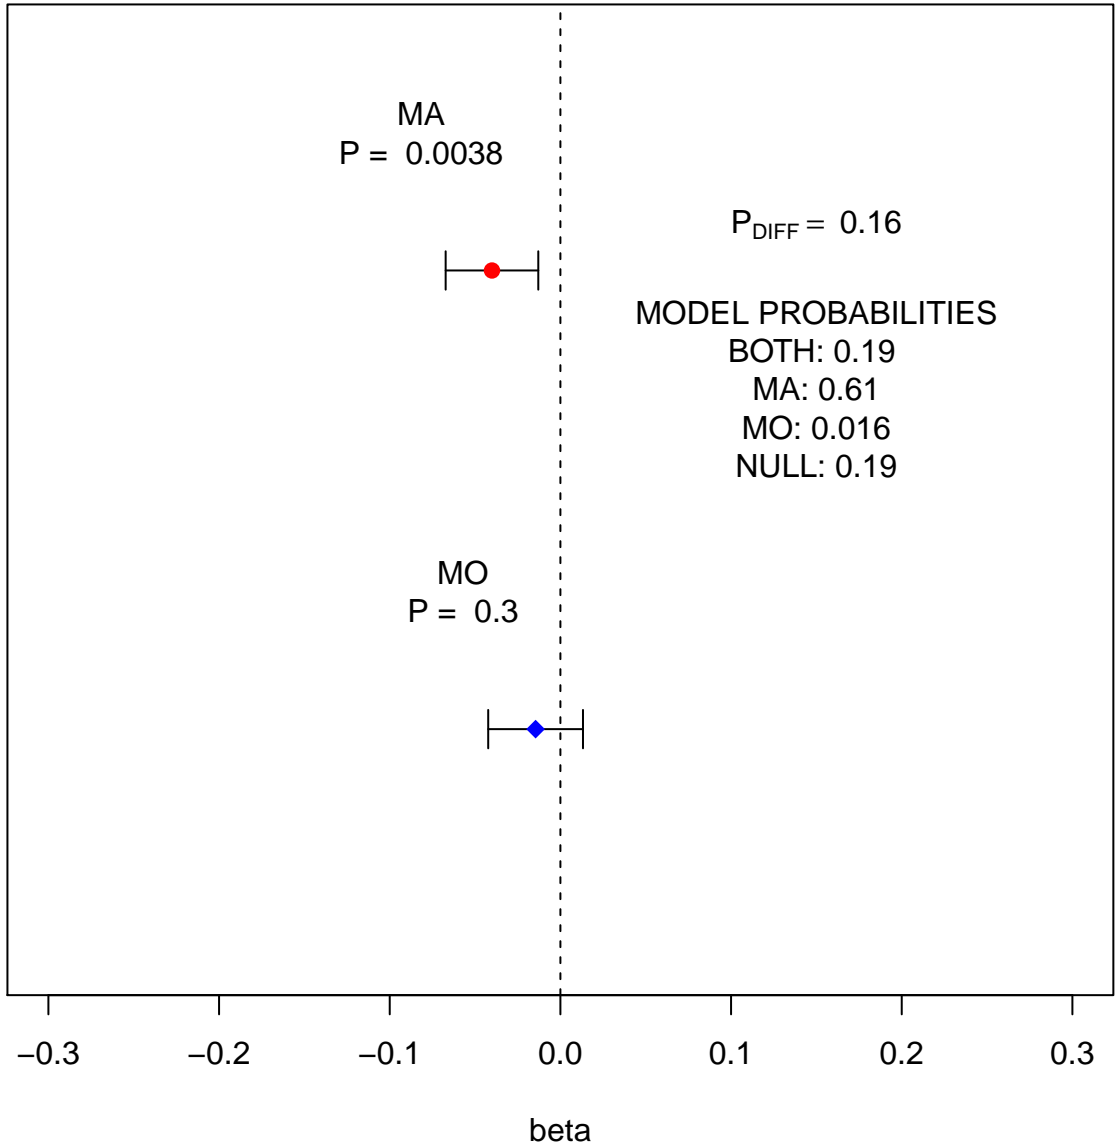

# near FGF6 (rs2160875)

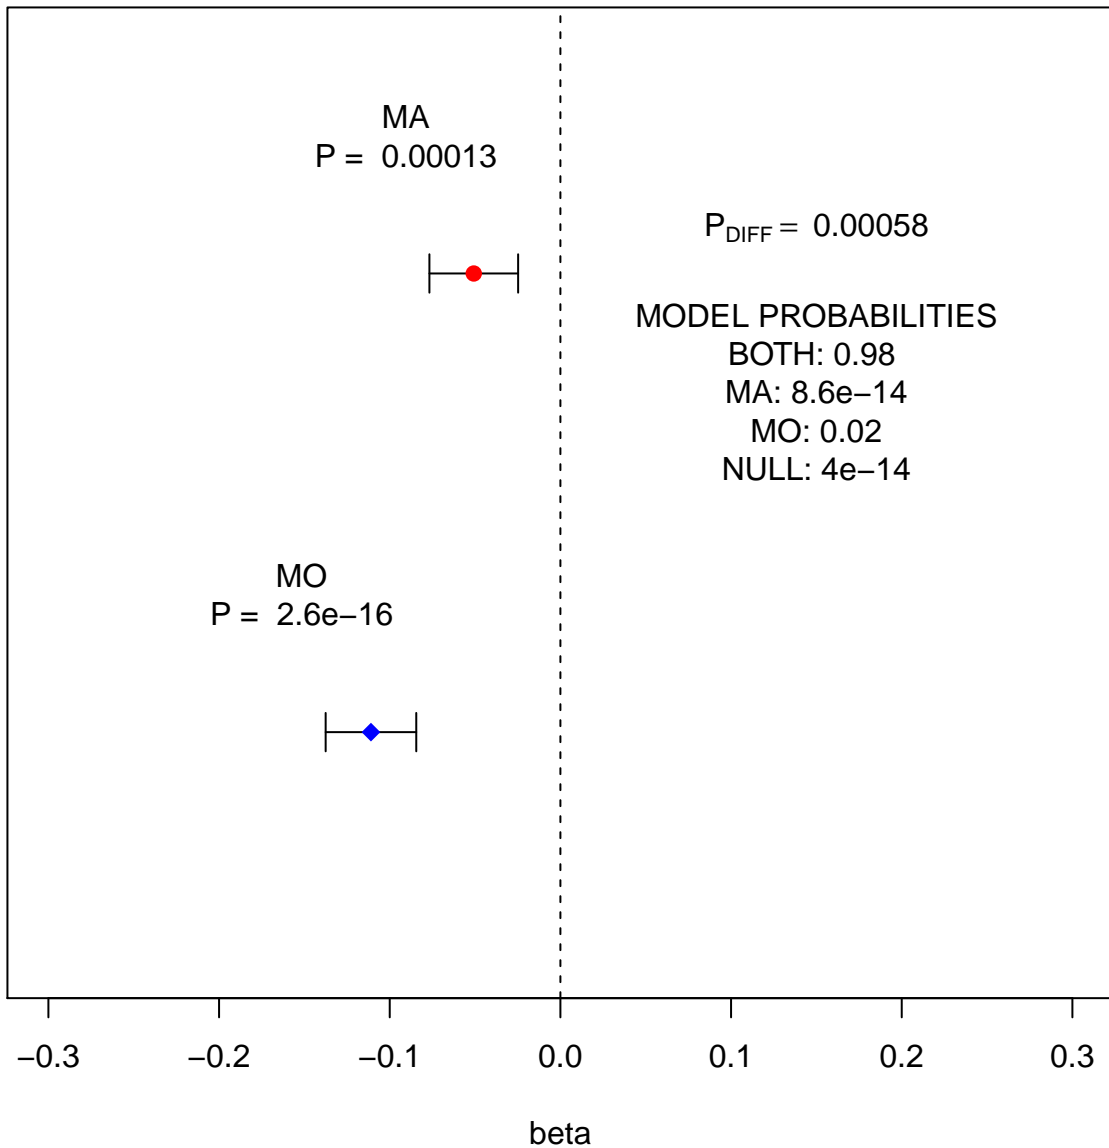

# PDZRN4 (rs1458170)

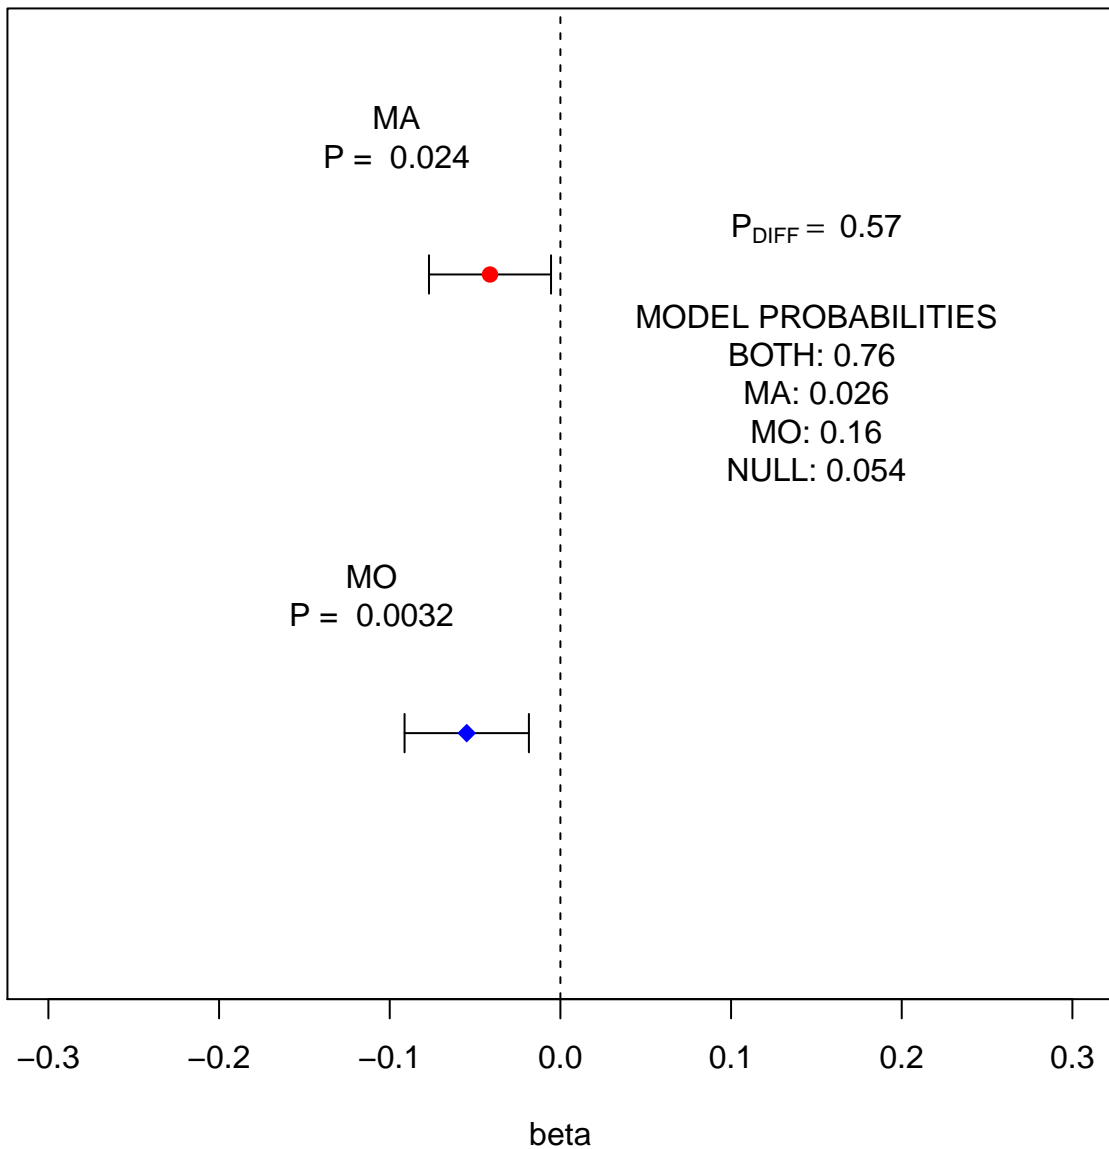

# LRP1 (rs11172113)

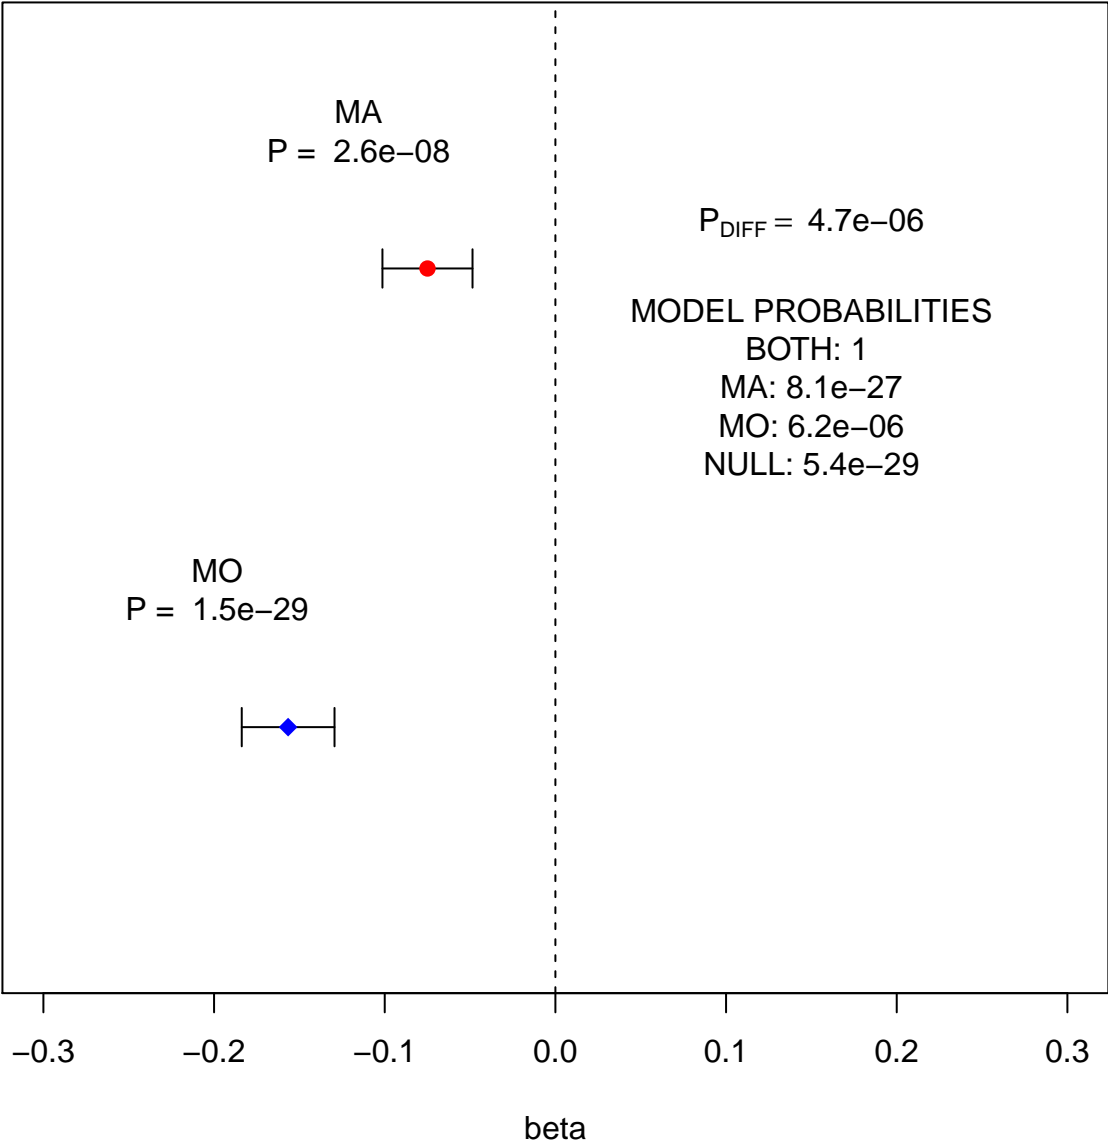

# ATP2B1 (rs4842676)

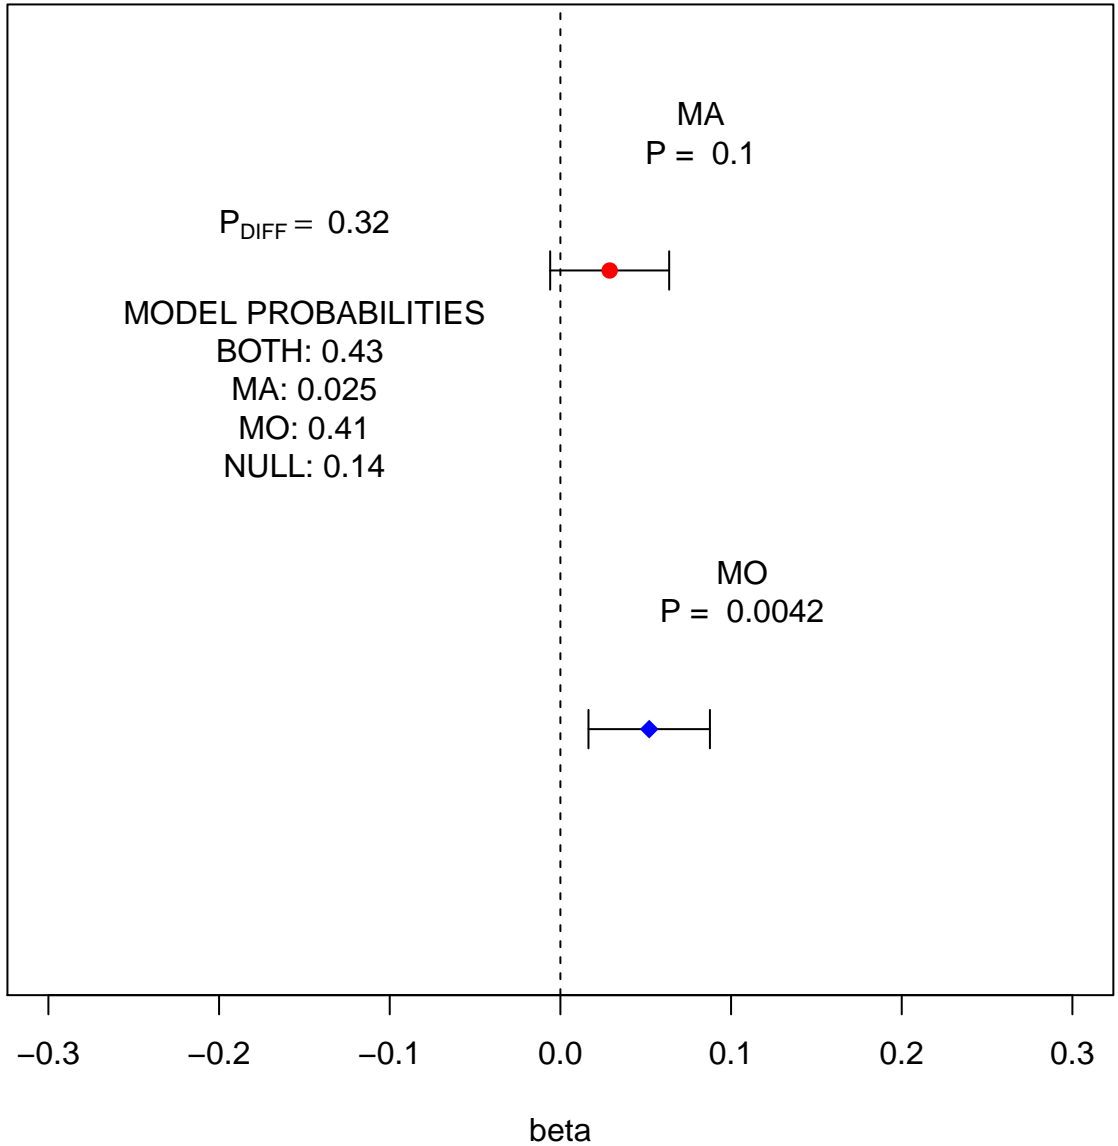

near RP11-690J15.1 (rs10777902)

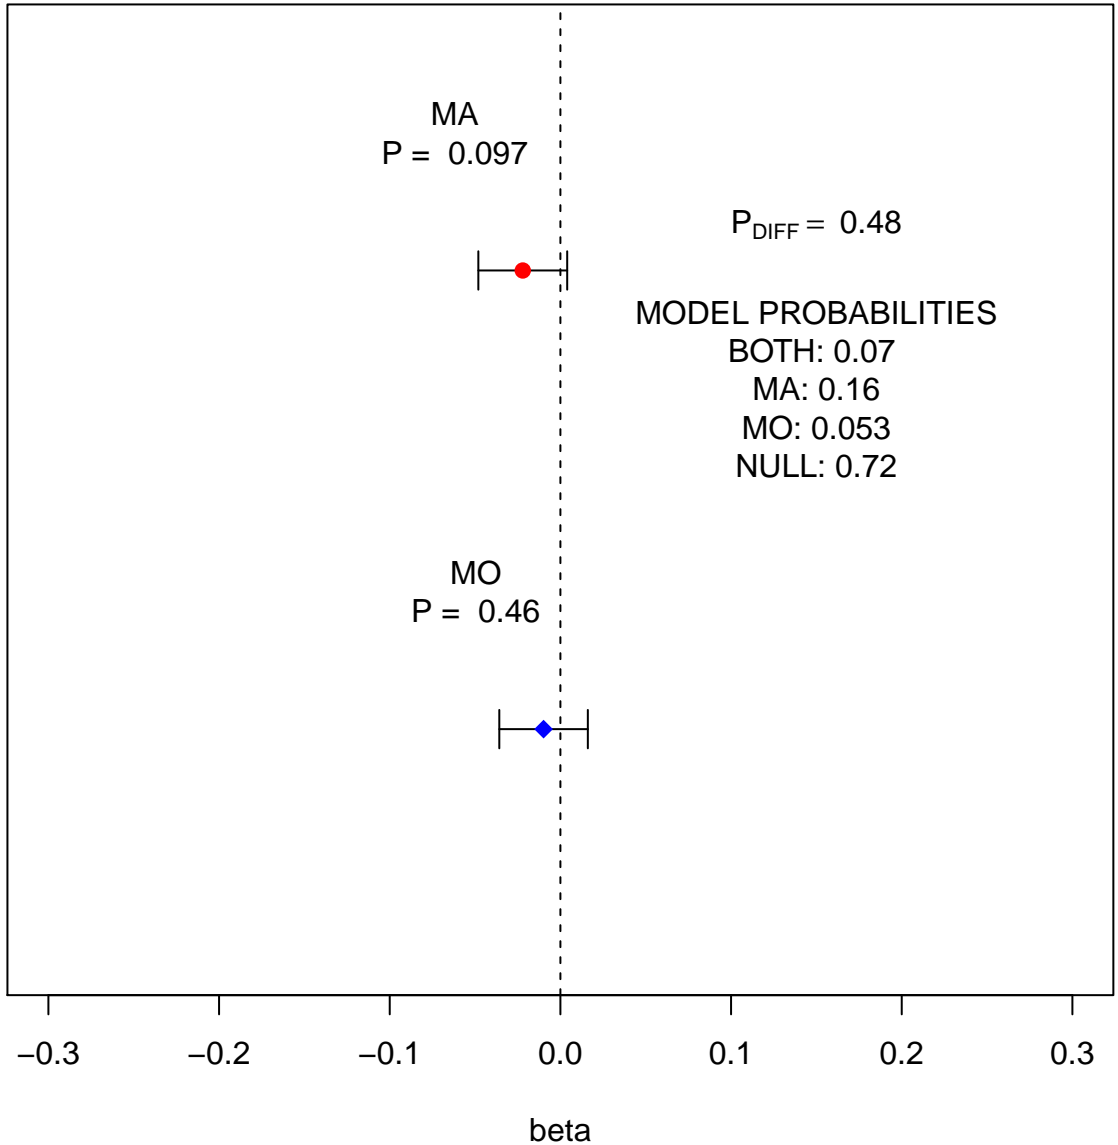

# NCOR2 (rs1271309)

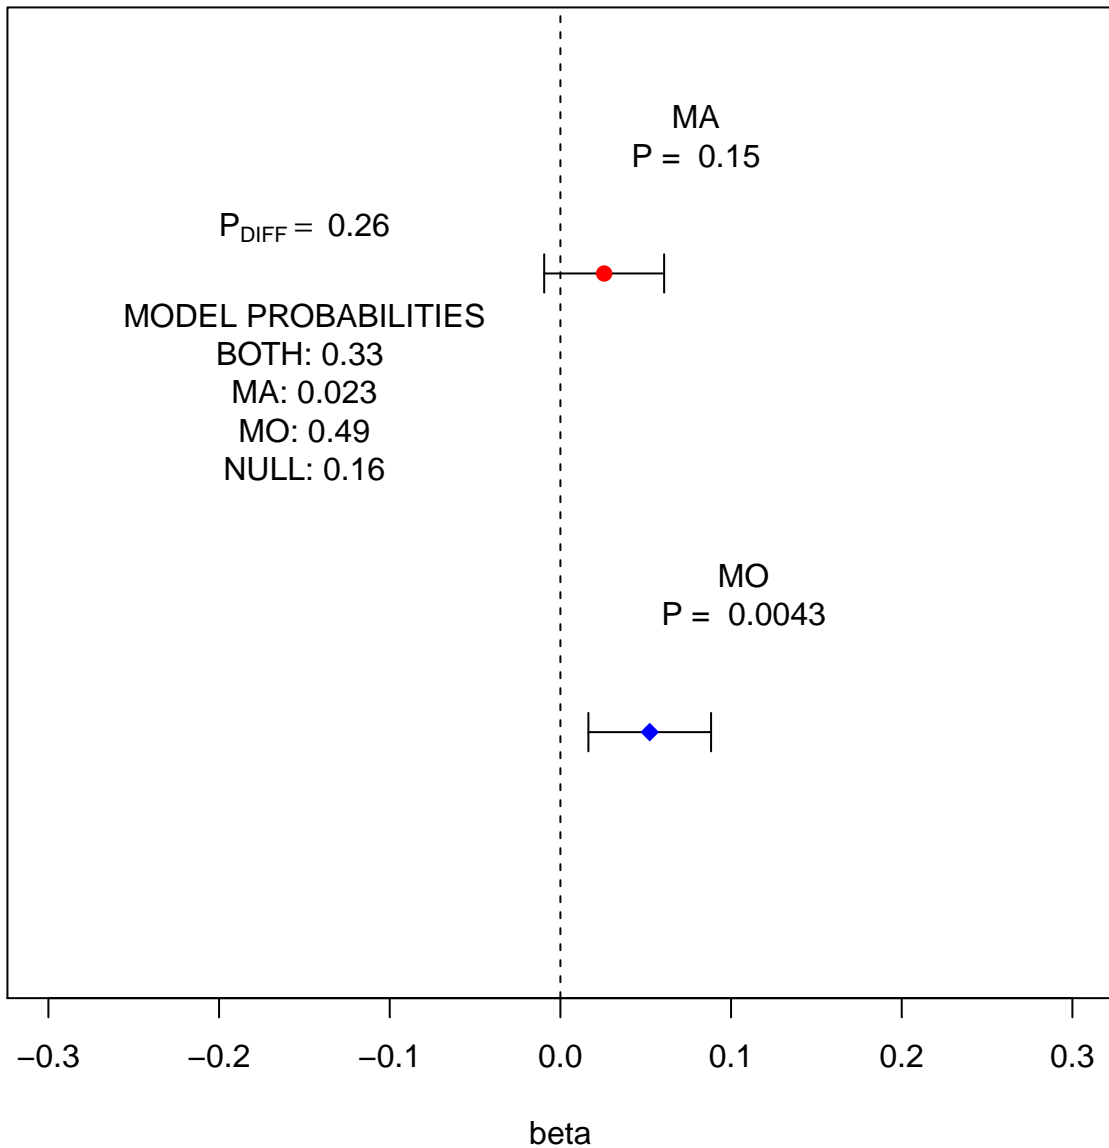

# LRCH1 (rs7335684)

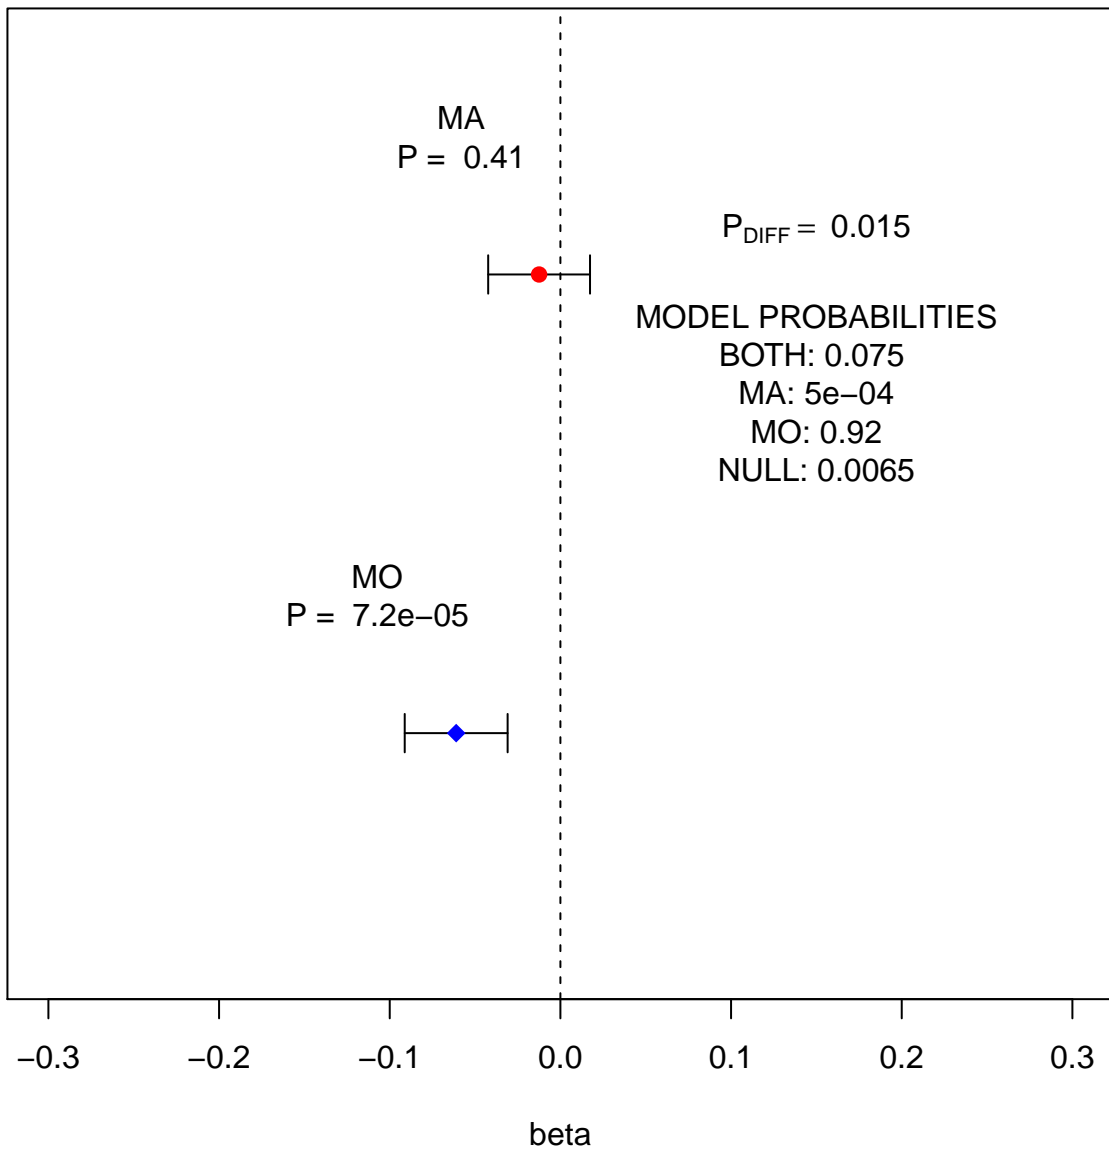



# RNF219-AS1 (rs7996252)

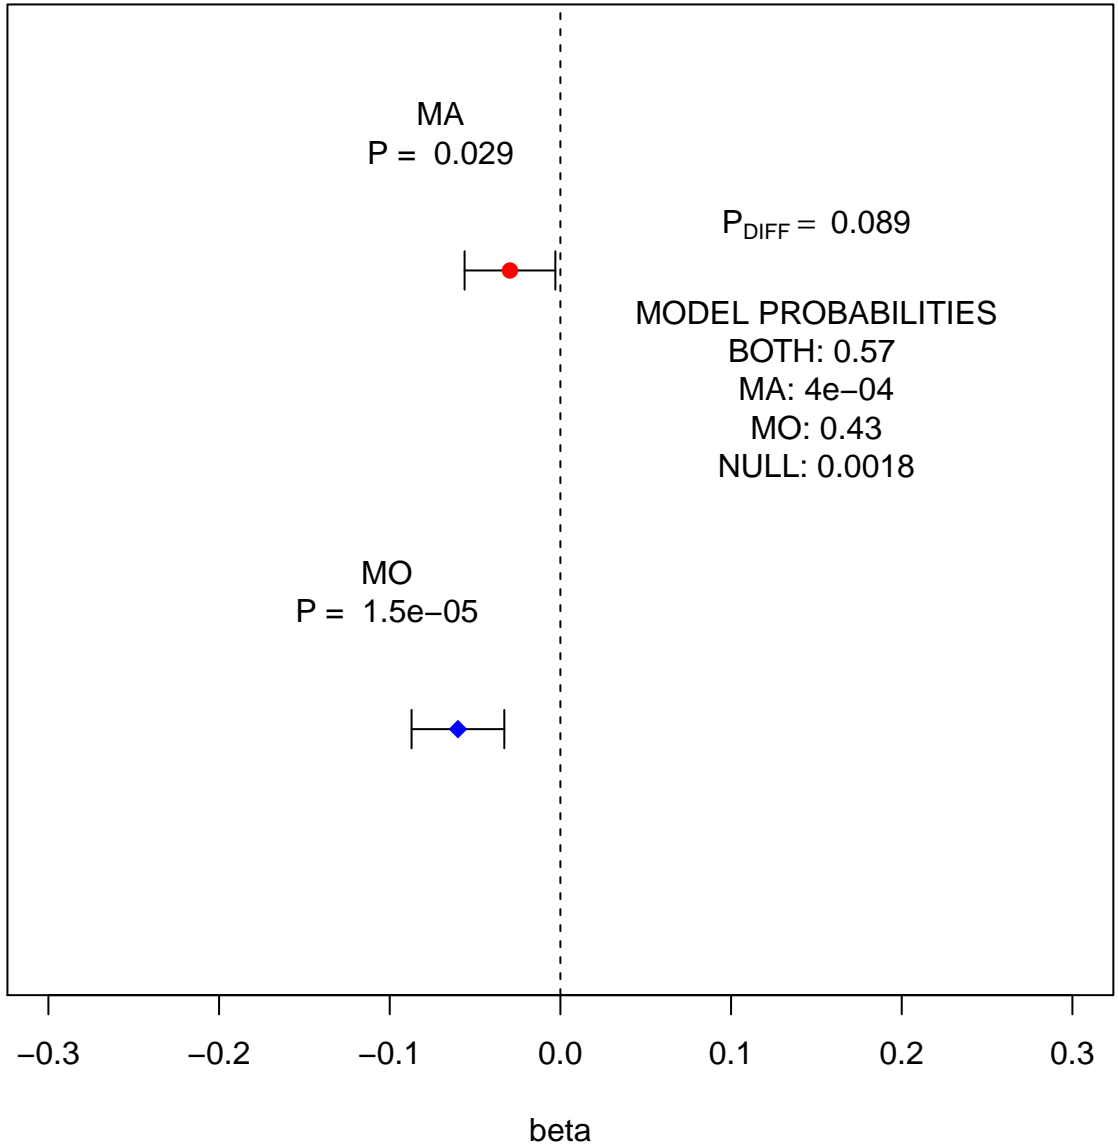

# near COL4A1 (rs2000660)

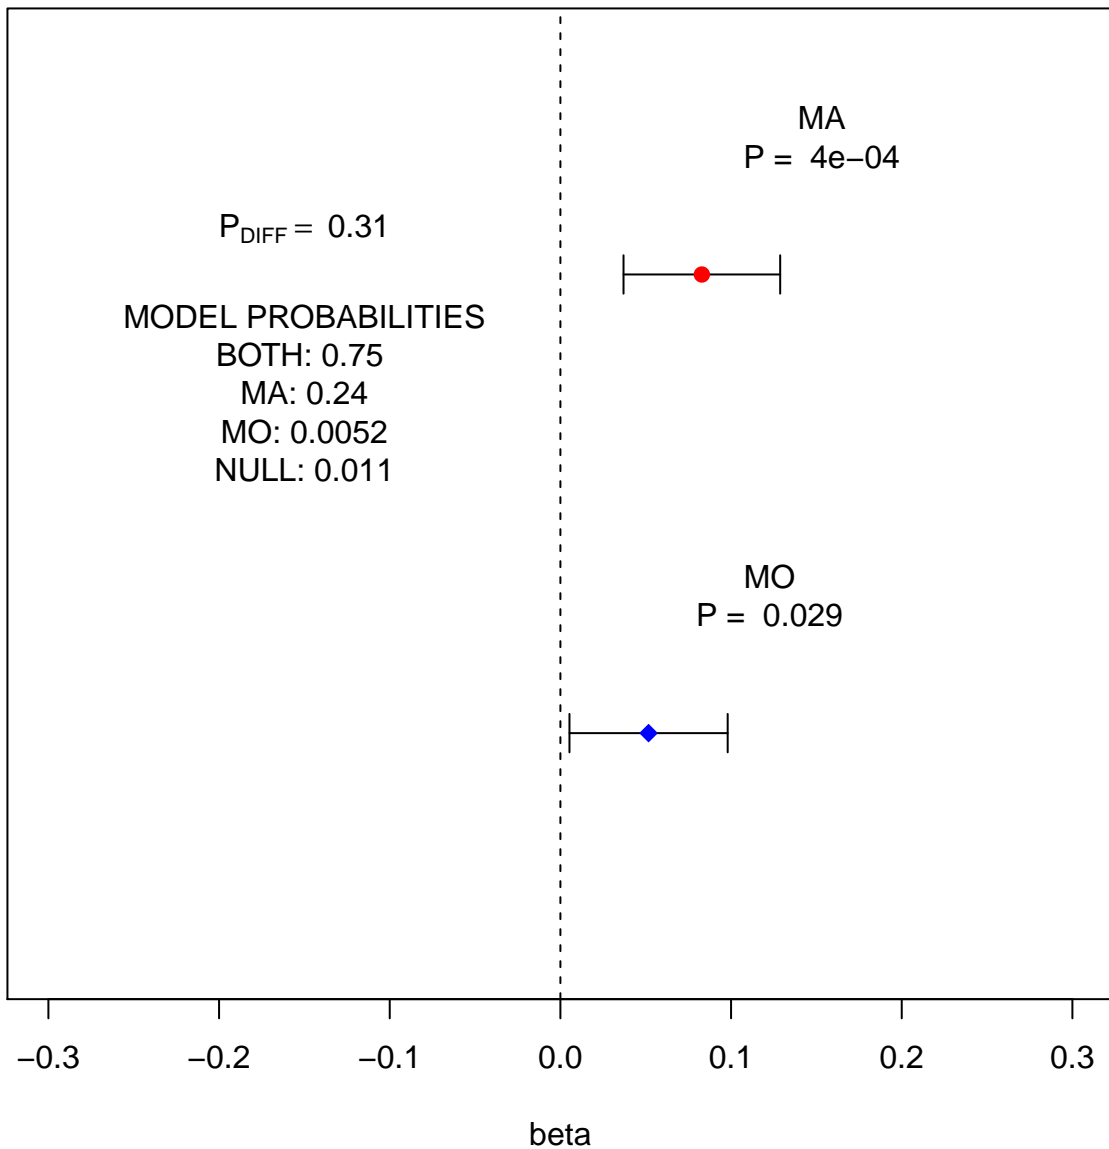

near RP11-384J4.2 (rs1245463)

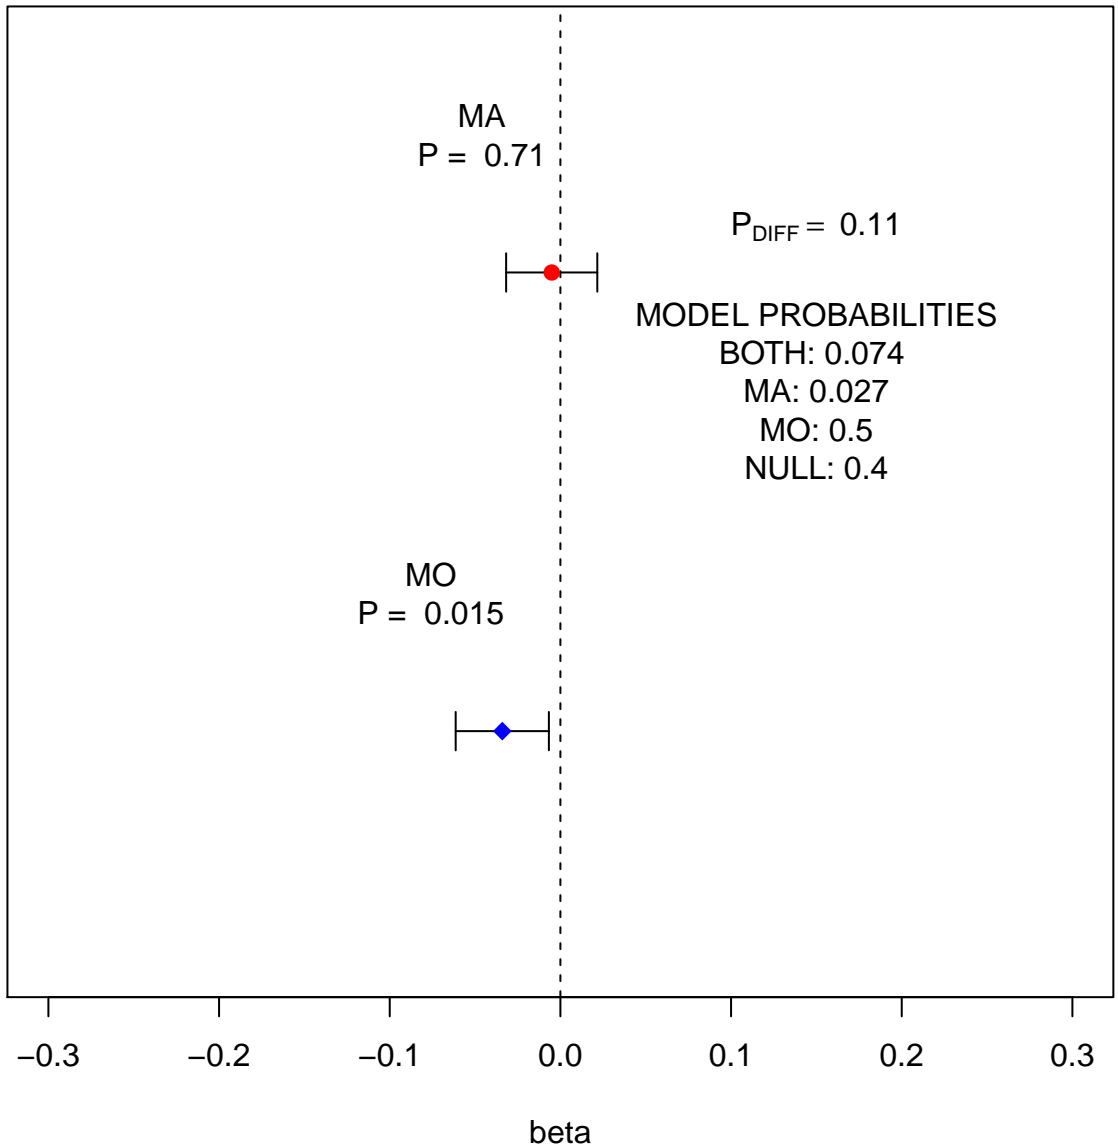

# near LRFN5 (rs1542668)

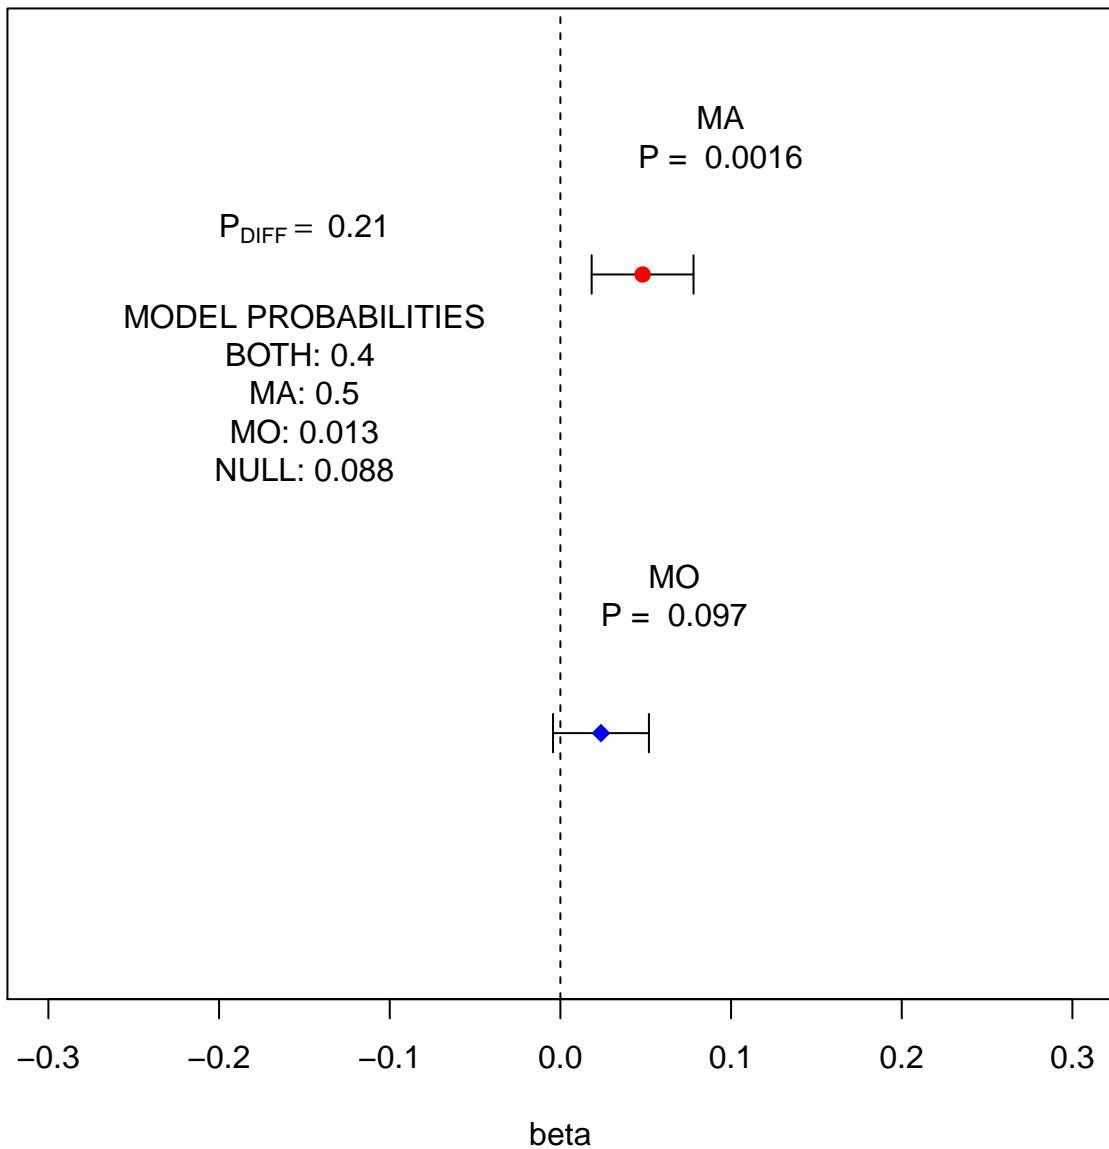

# near ARID4A (rs28756401)

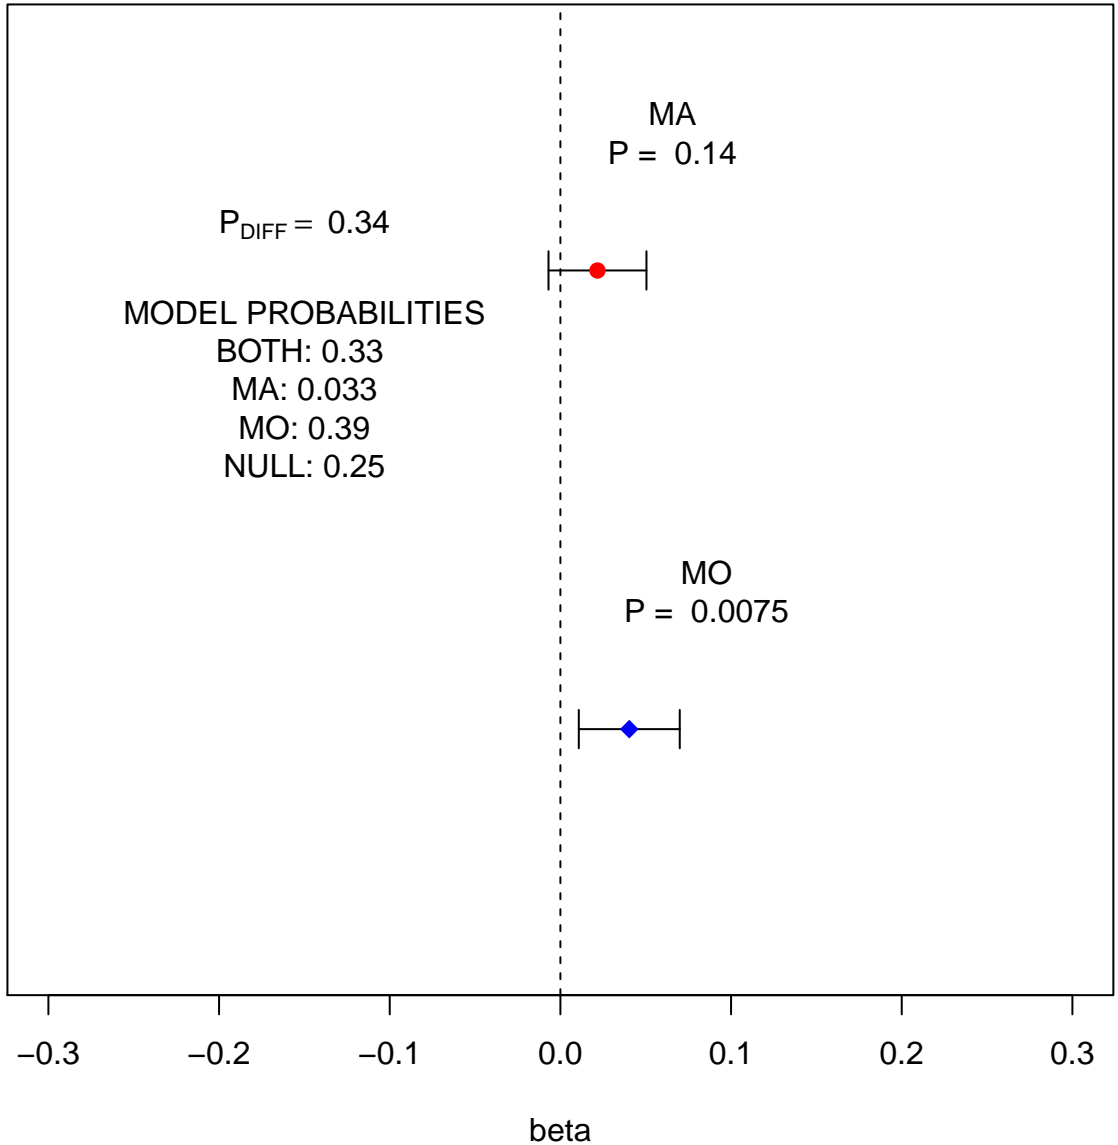

# DLST (rs55707505)

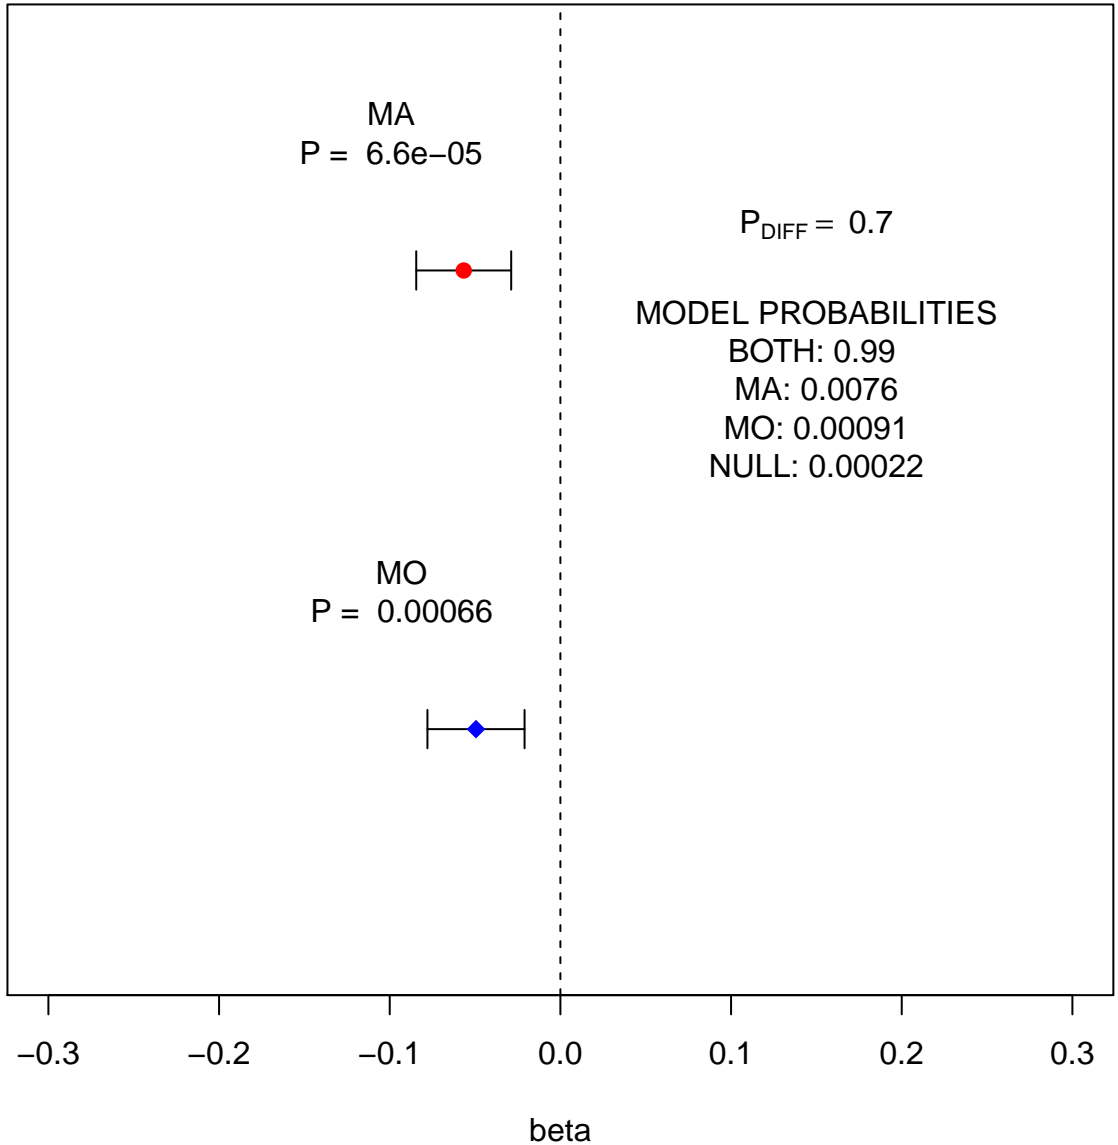

# IFT43 (rs75002882)

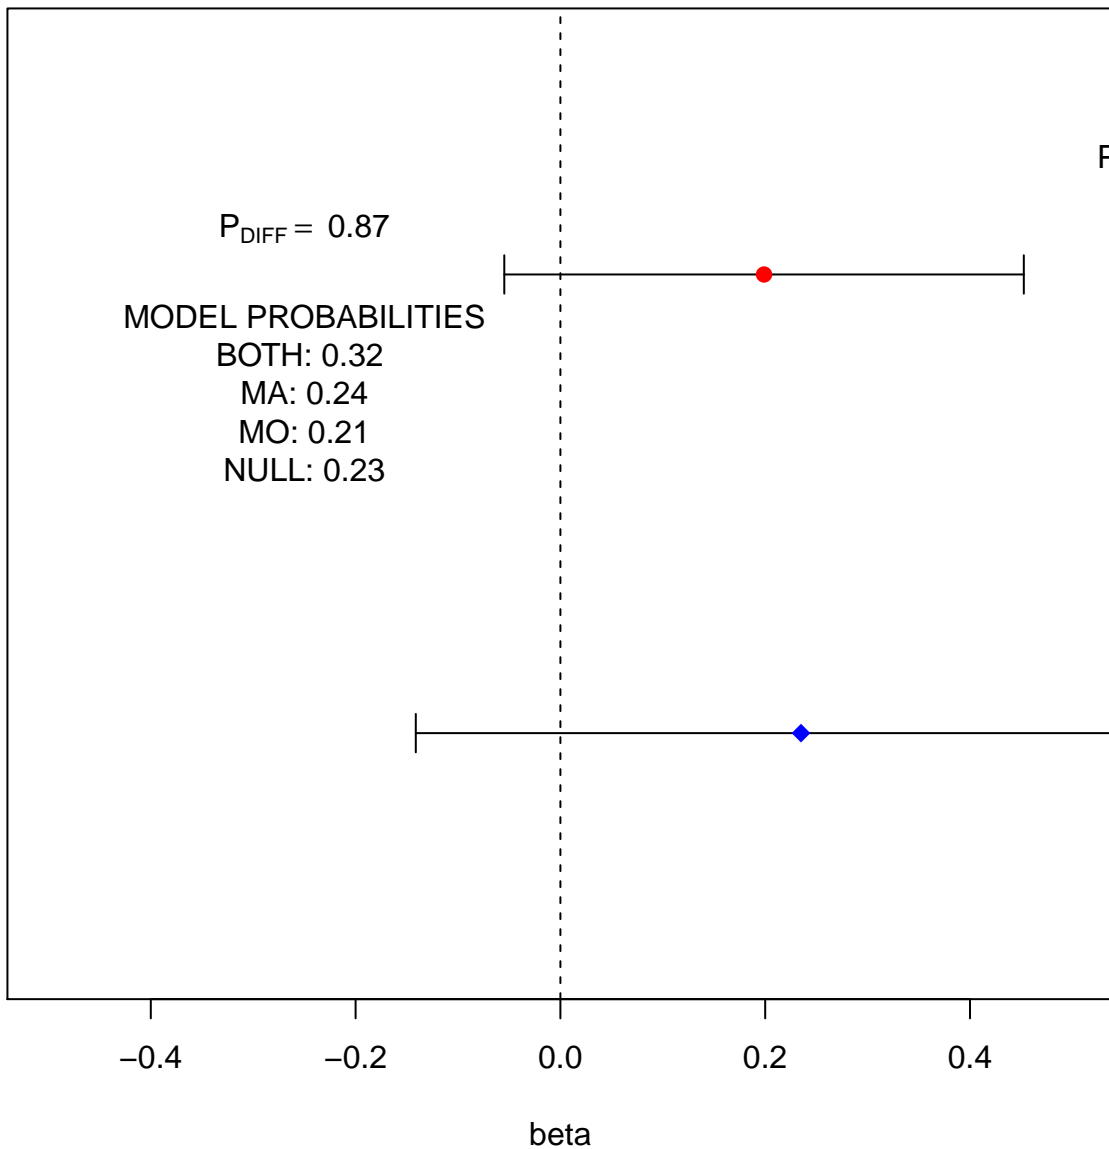

# near ITPK1 (rs11624776)

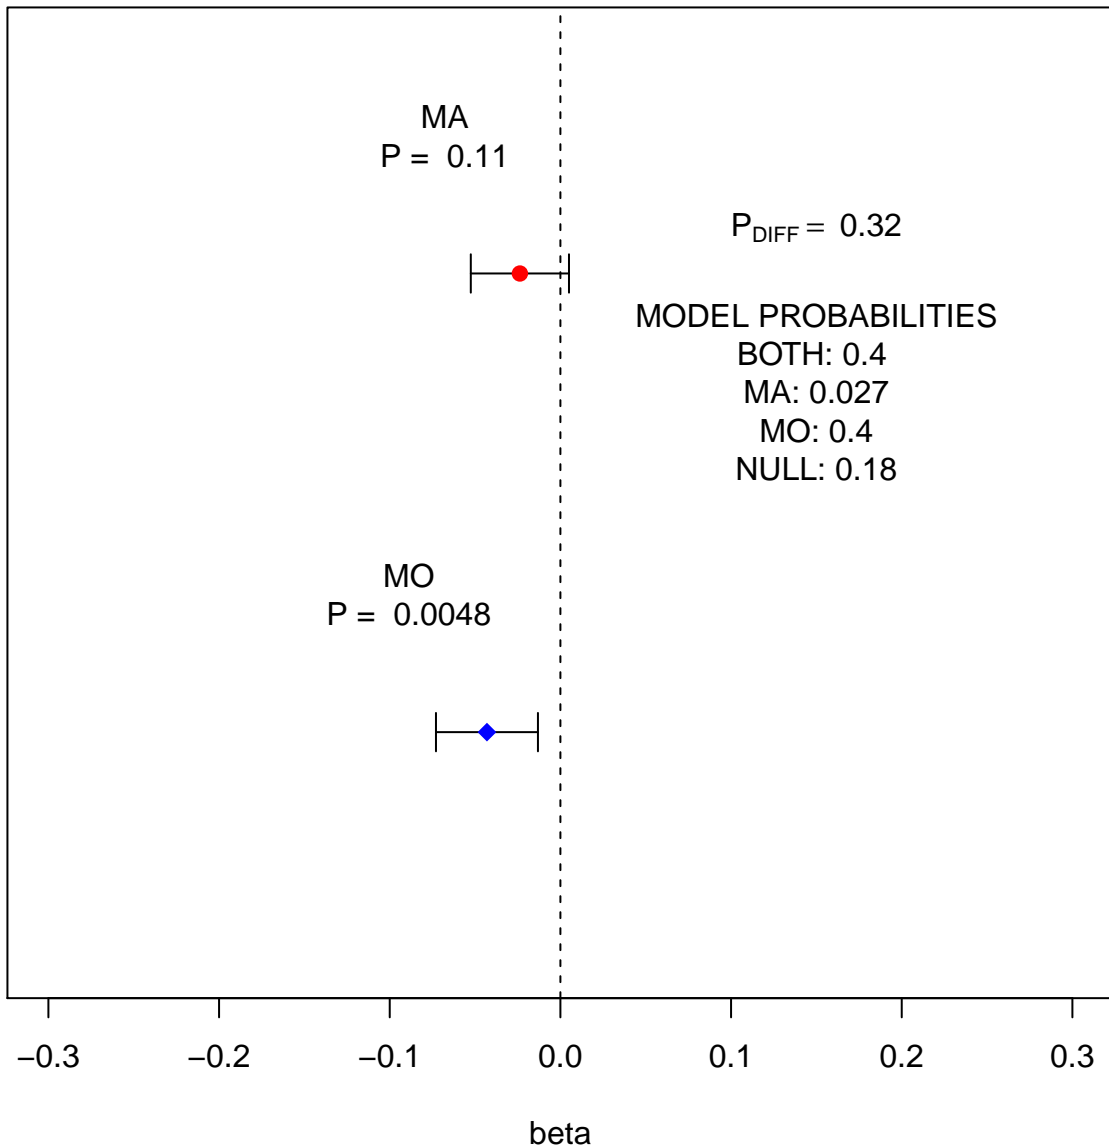



# SERPINA1 (rs28929474)

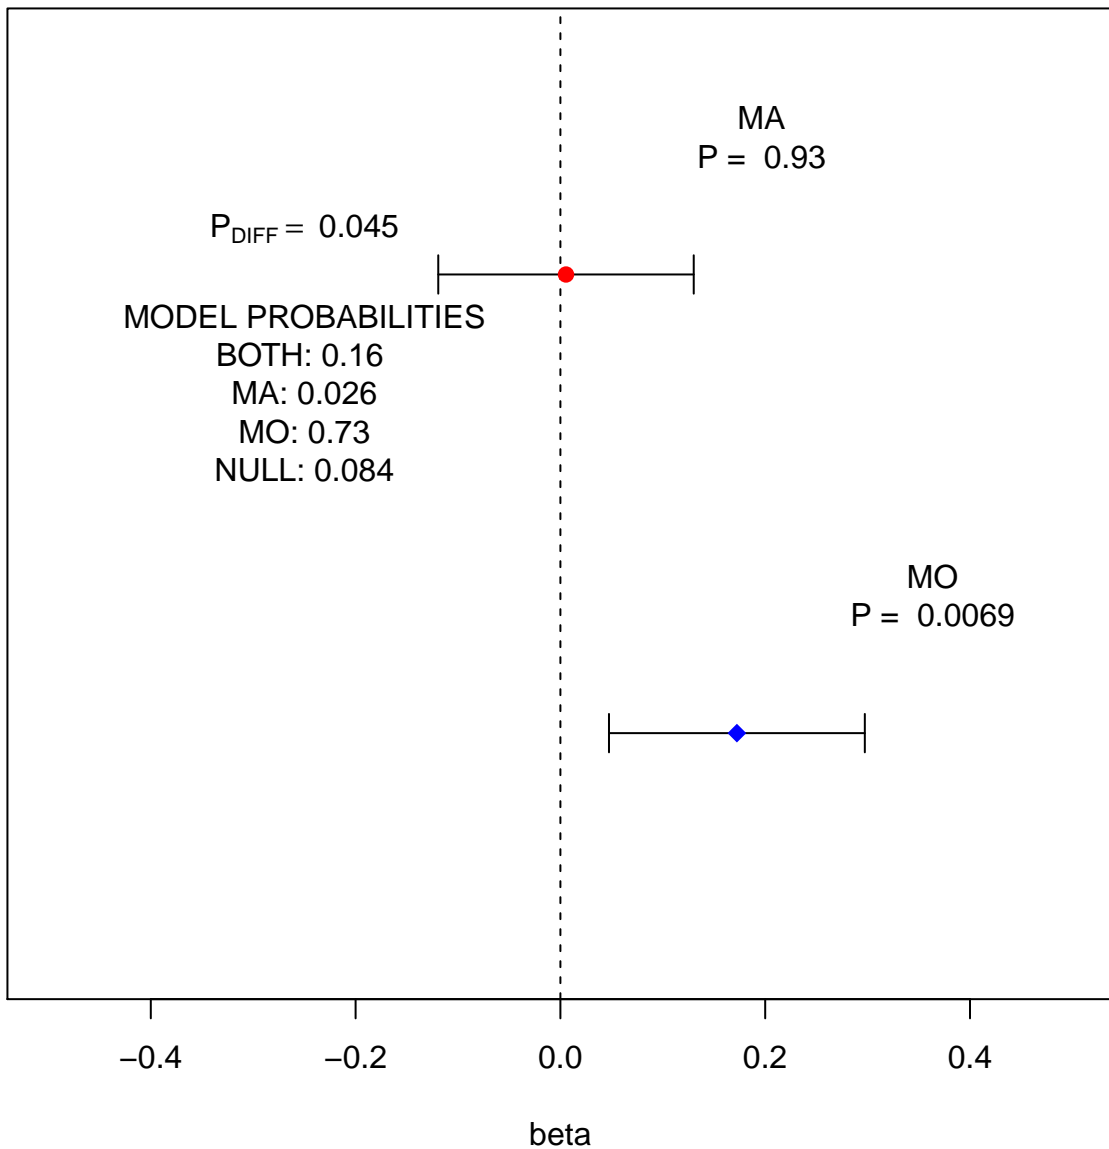

# ABHD17C (rs12708529)

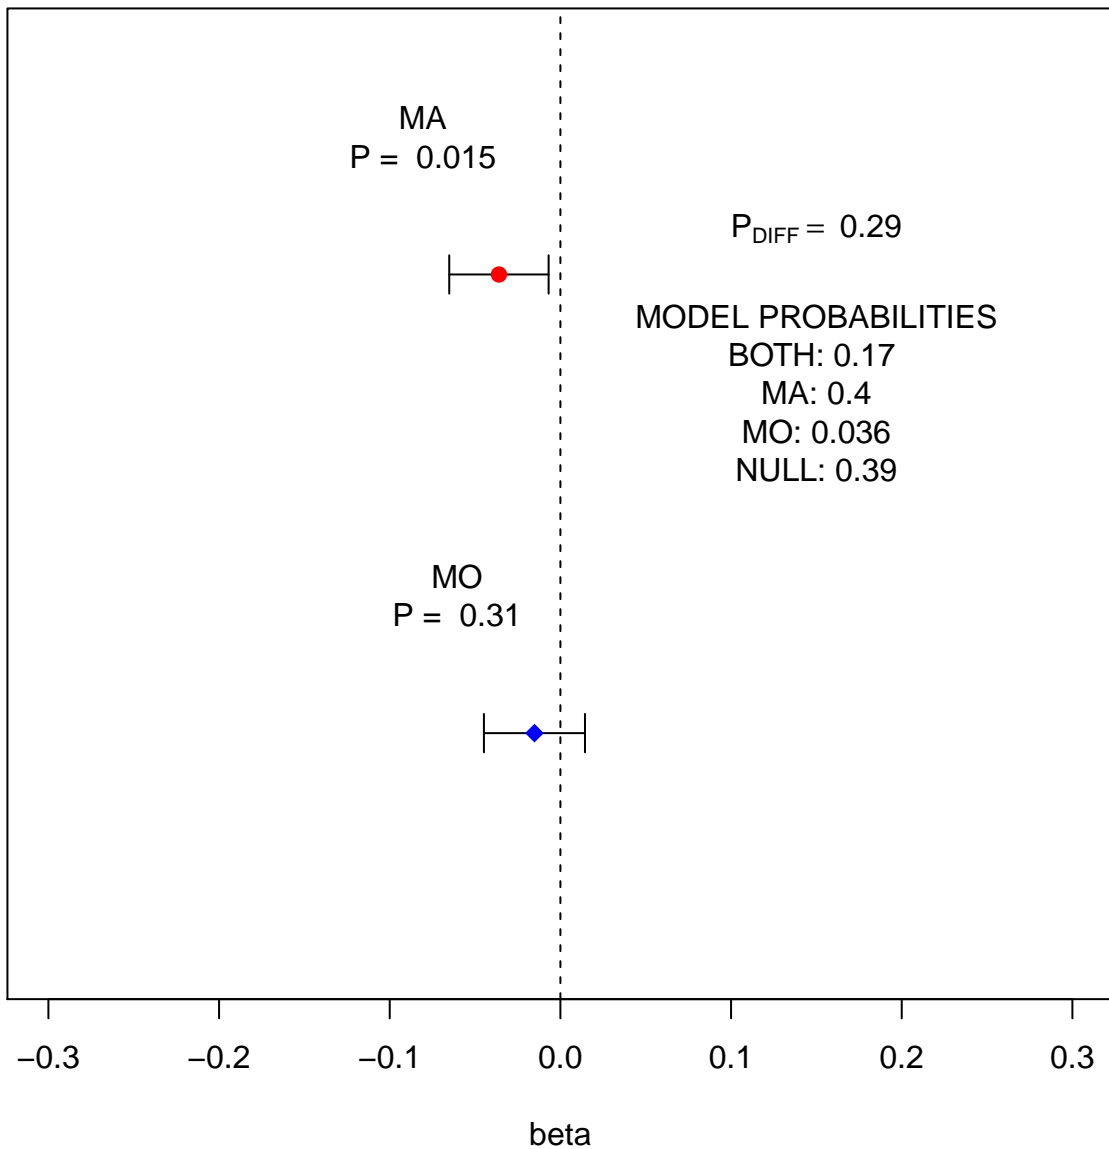

# HMOX2 (rs12598836)

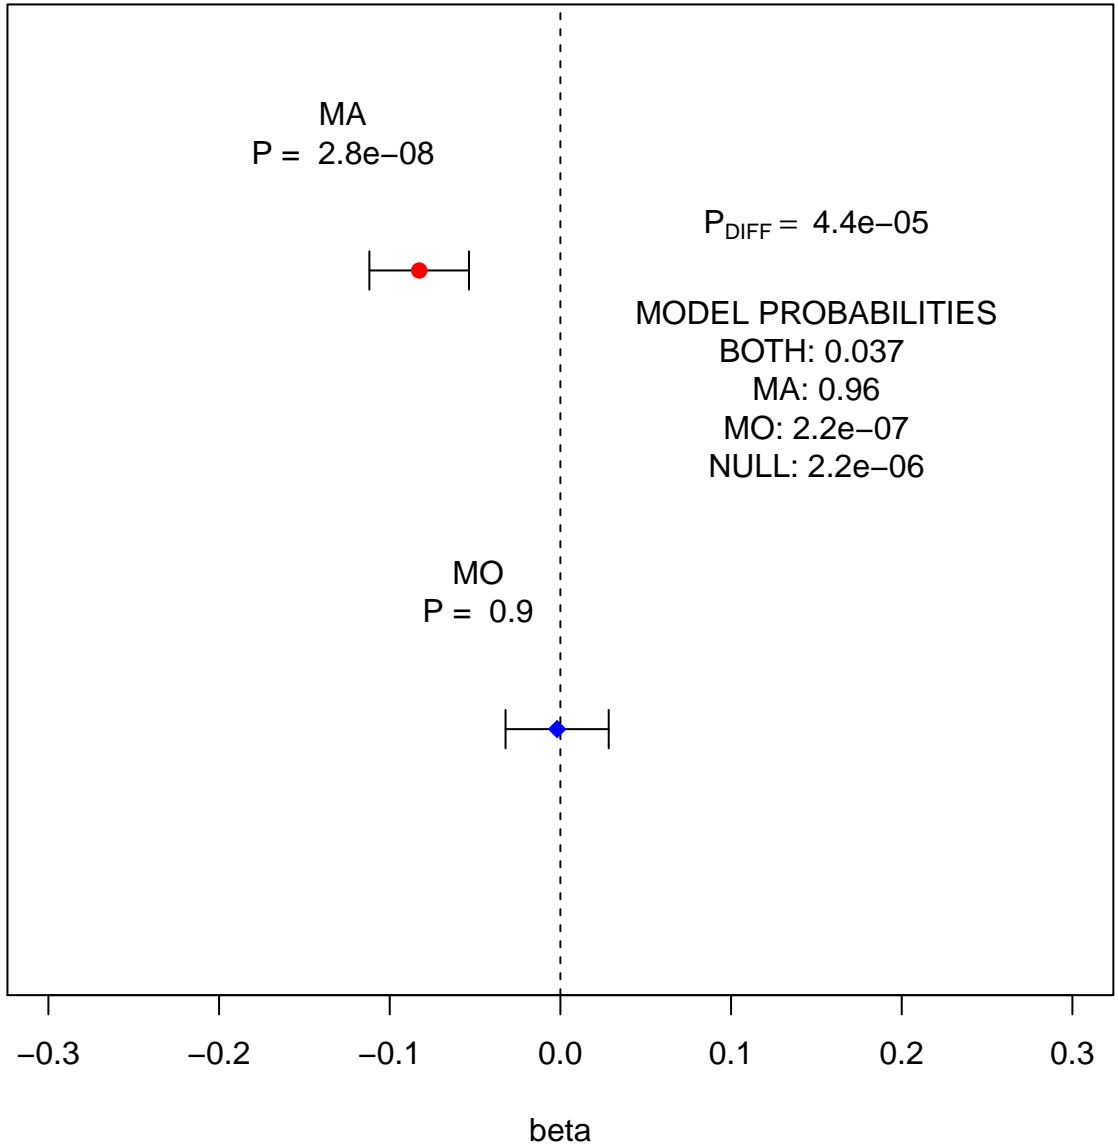

# CFDP1 (rs8046696)

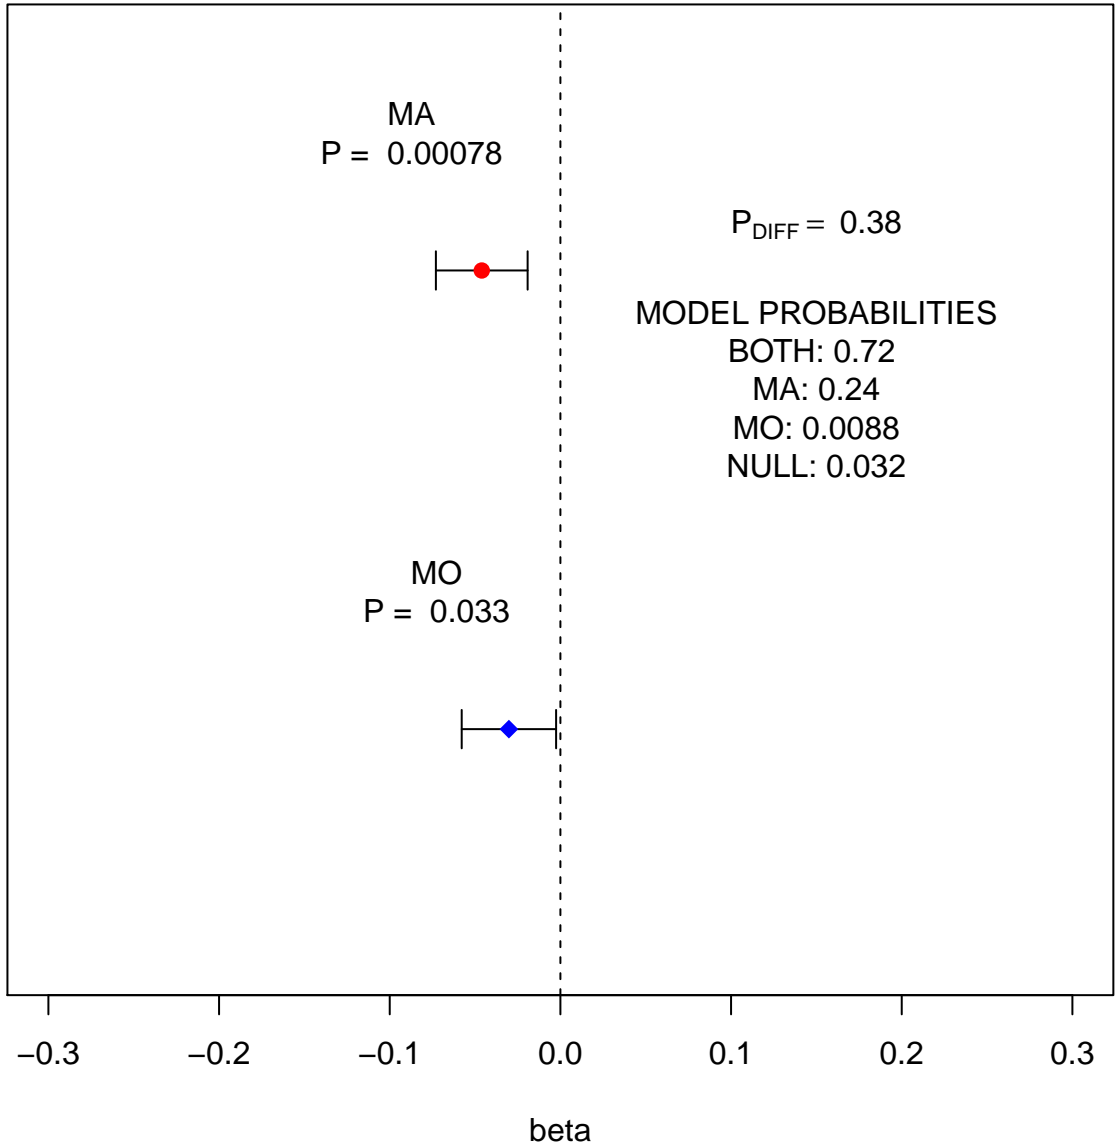

near ZCCHC14 (rs8052831)

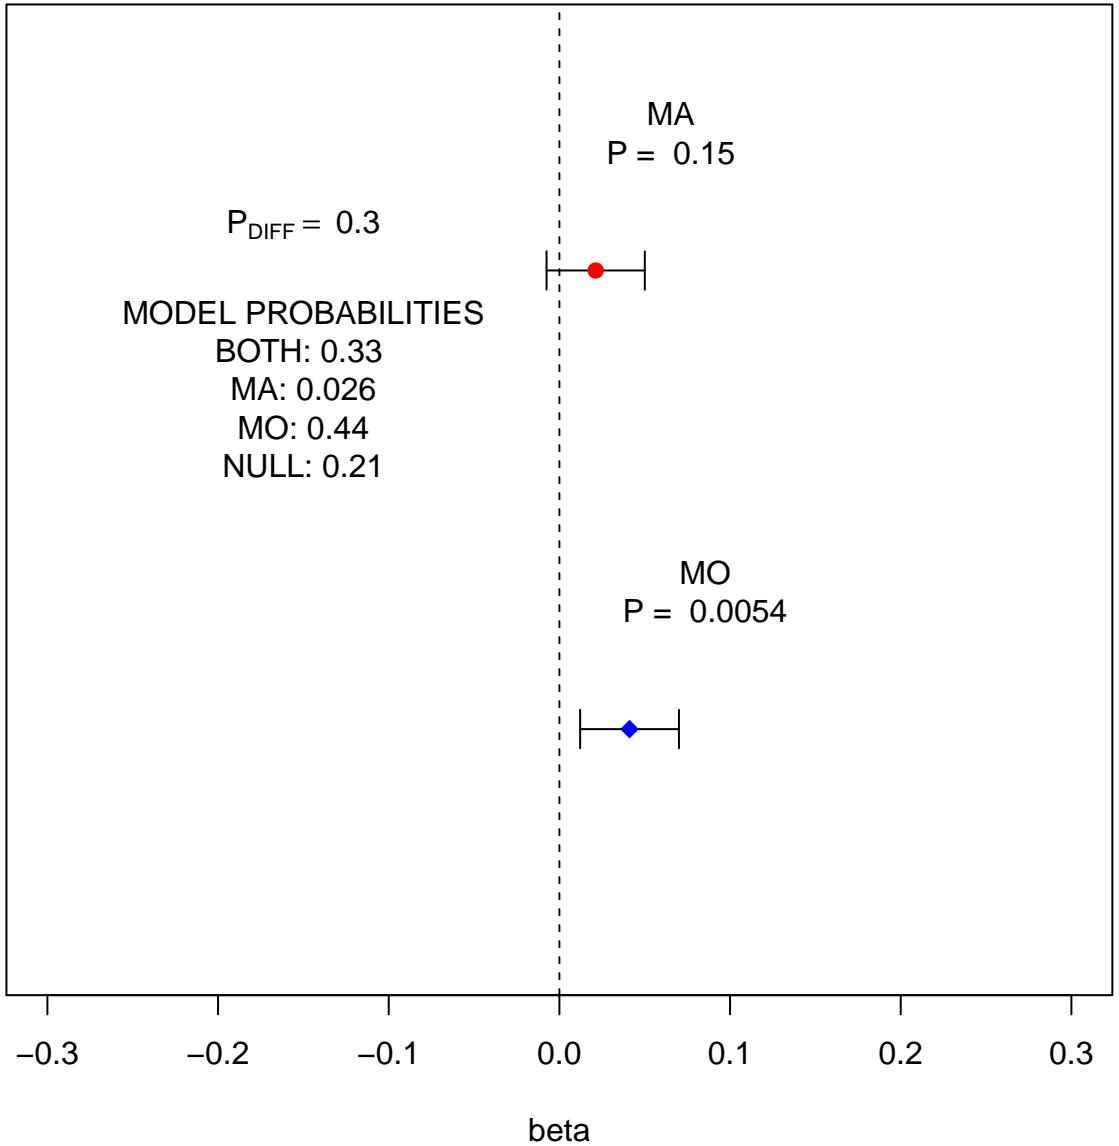

# SMG6 (rs9894634)

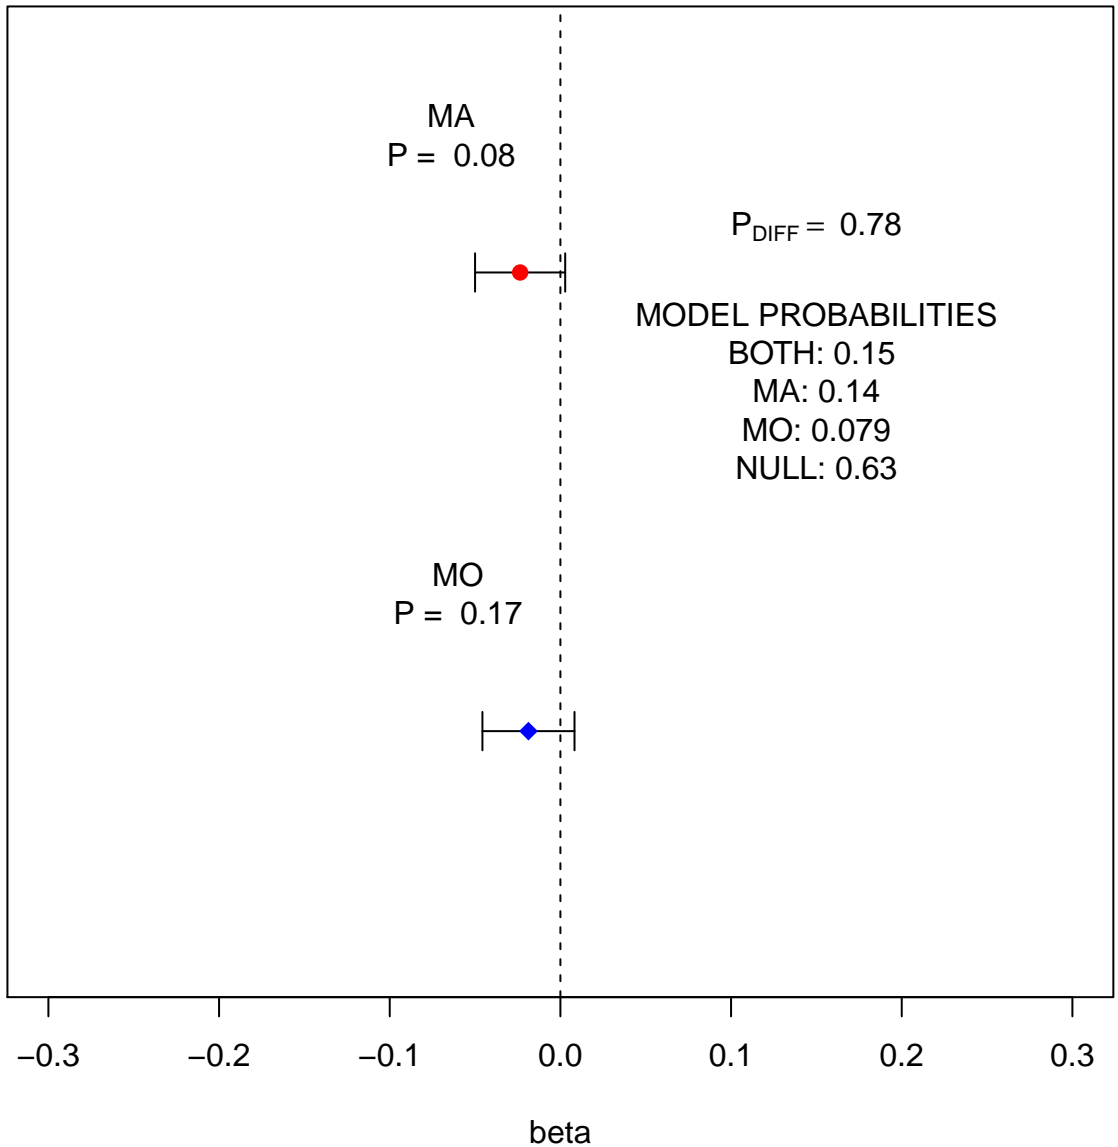

# ZBTB4 (rs34914463)

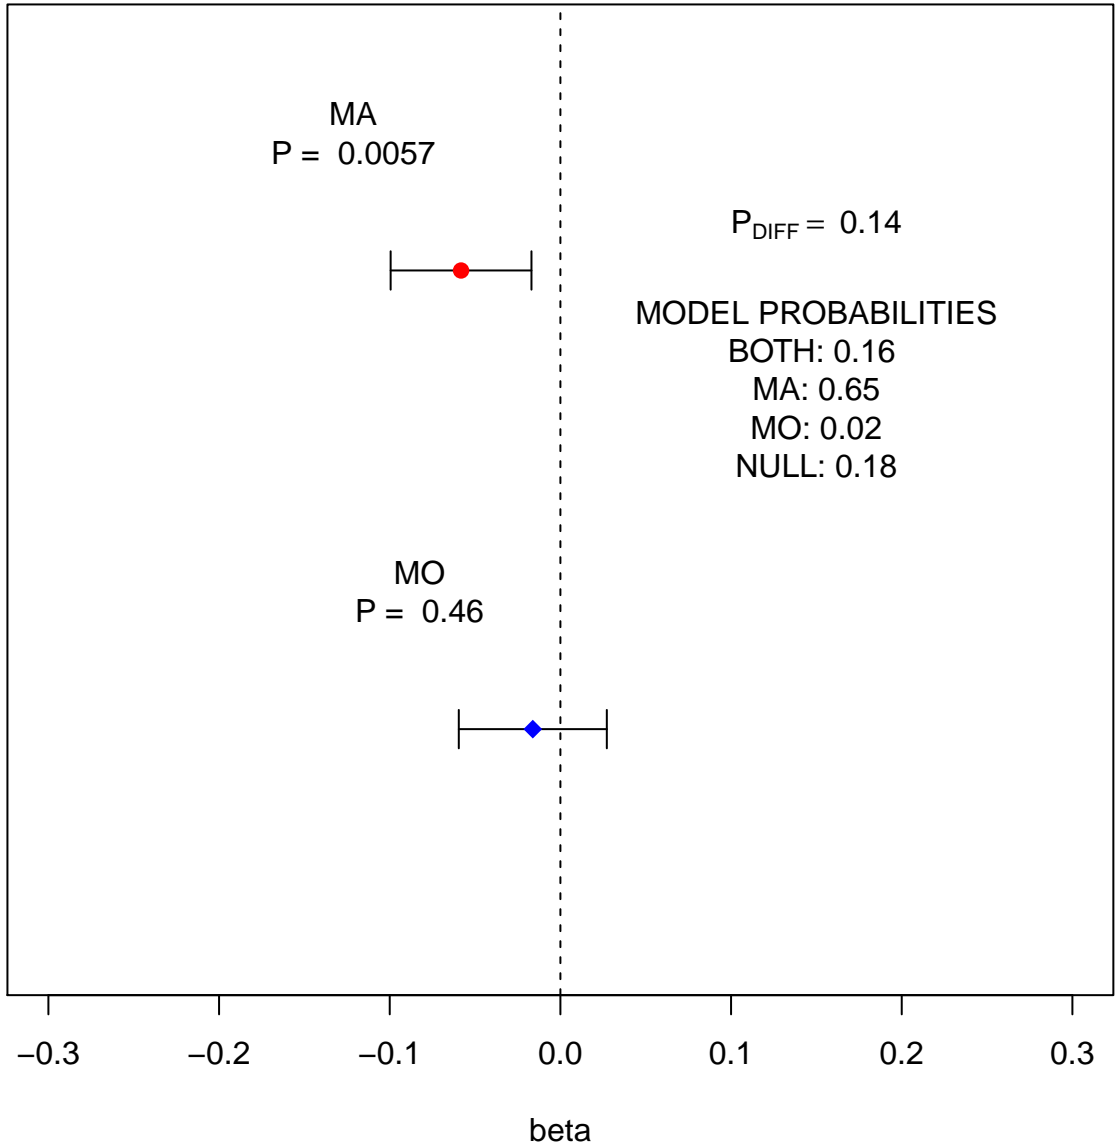

# HOXB3 (rs11652860)

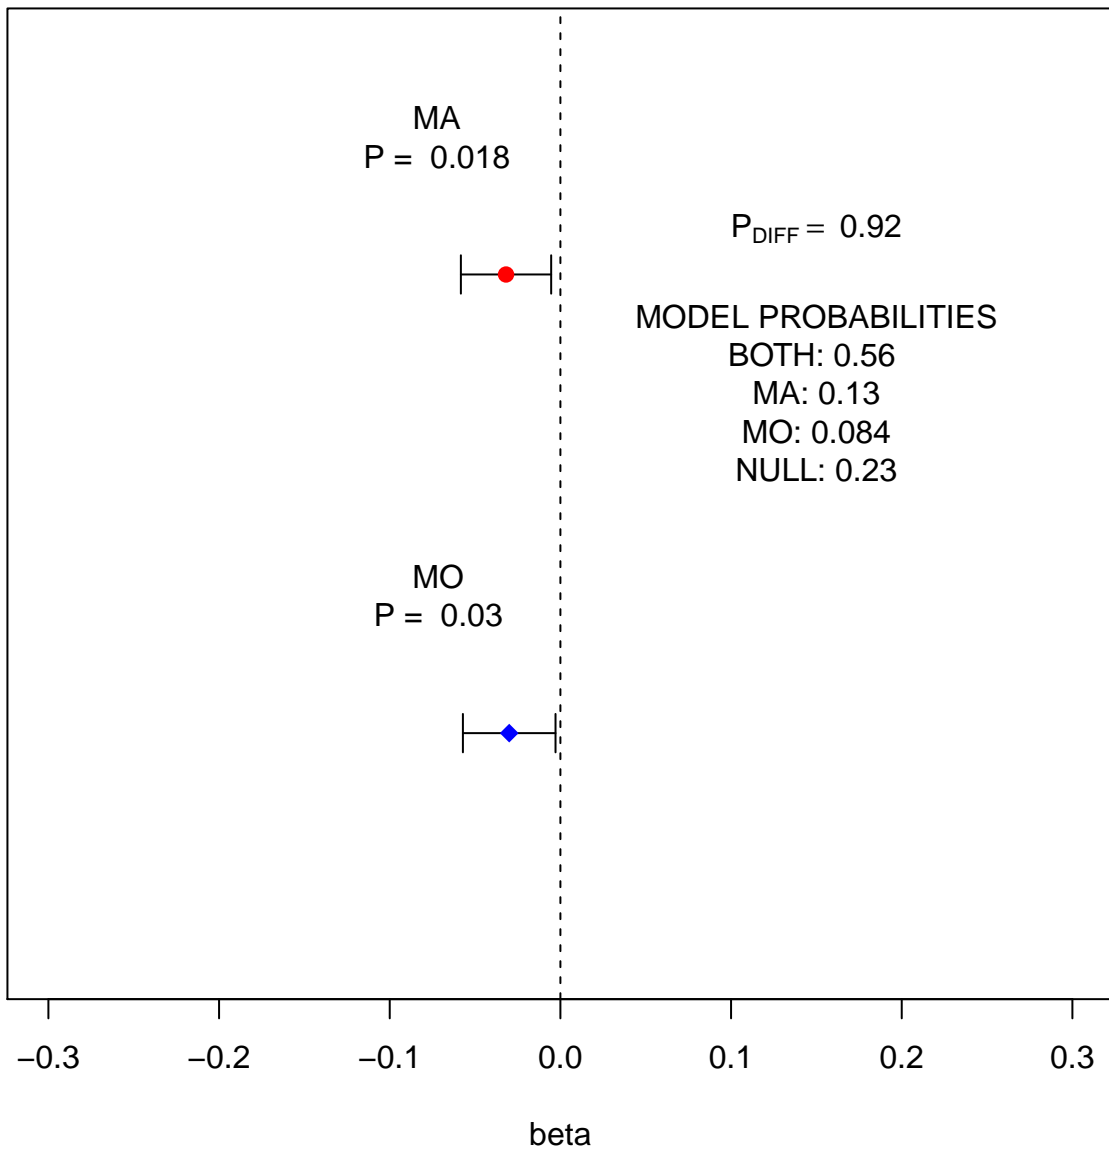



# RP11-81K2.1 (rs2119930)

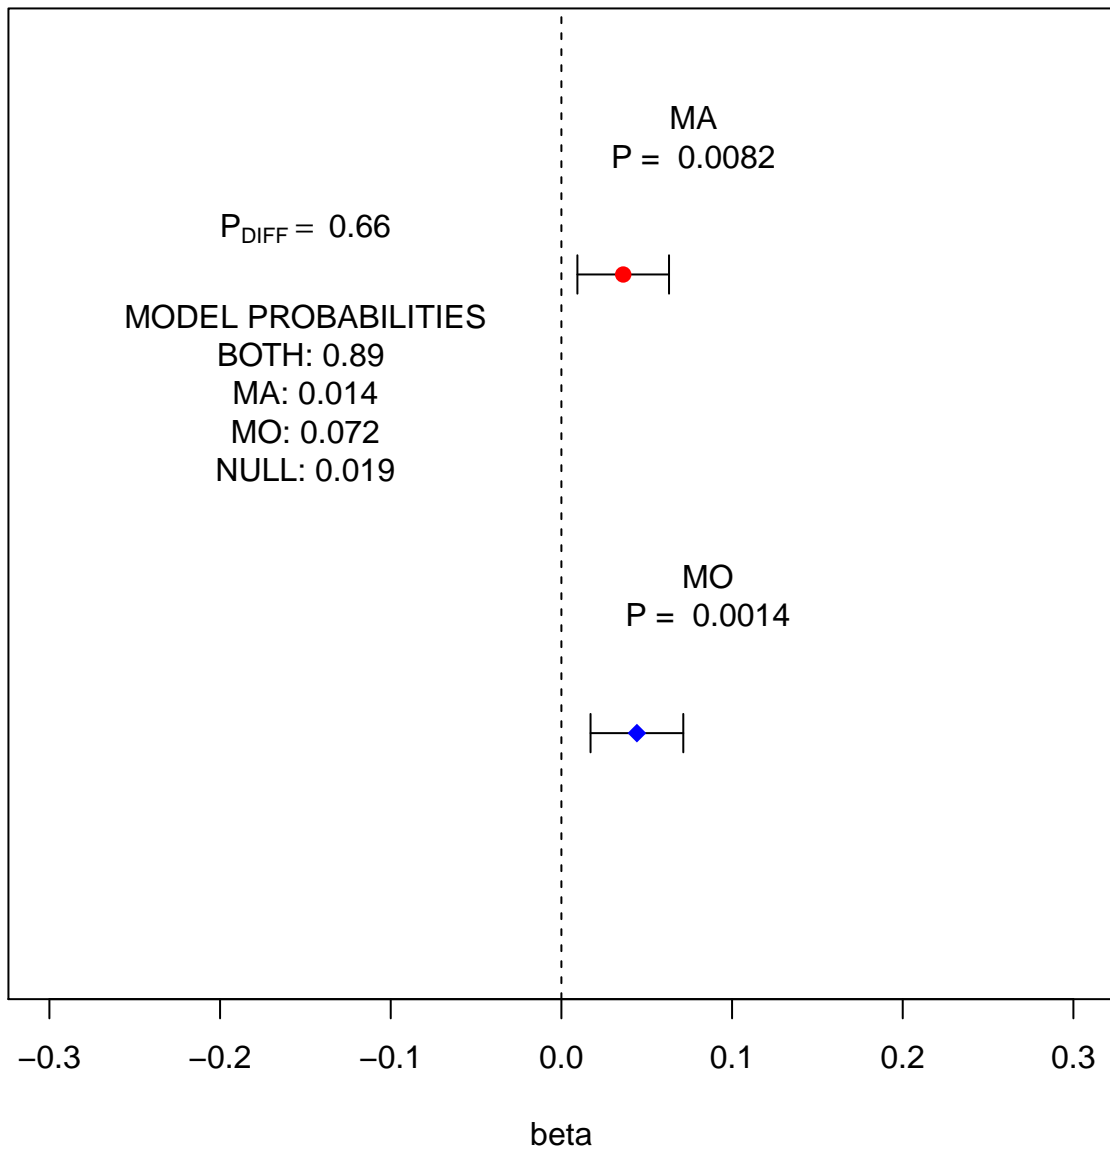

# MRC2 (rs12452590)

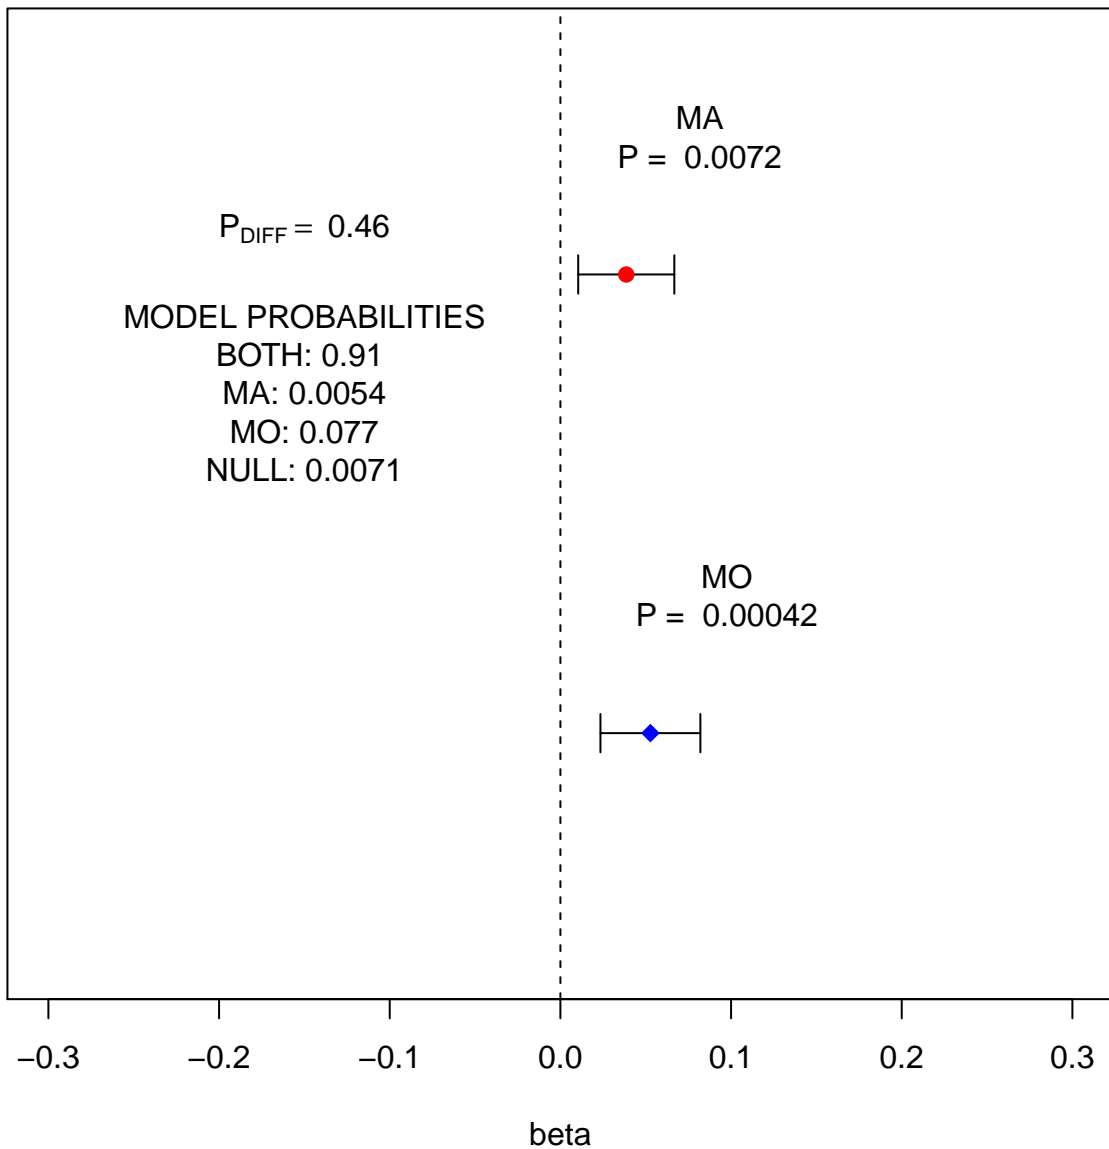

# TBC1D16 (rs1285294)

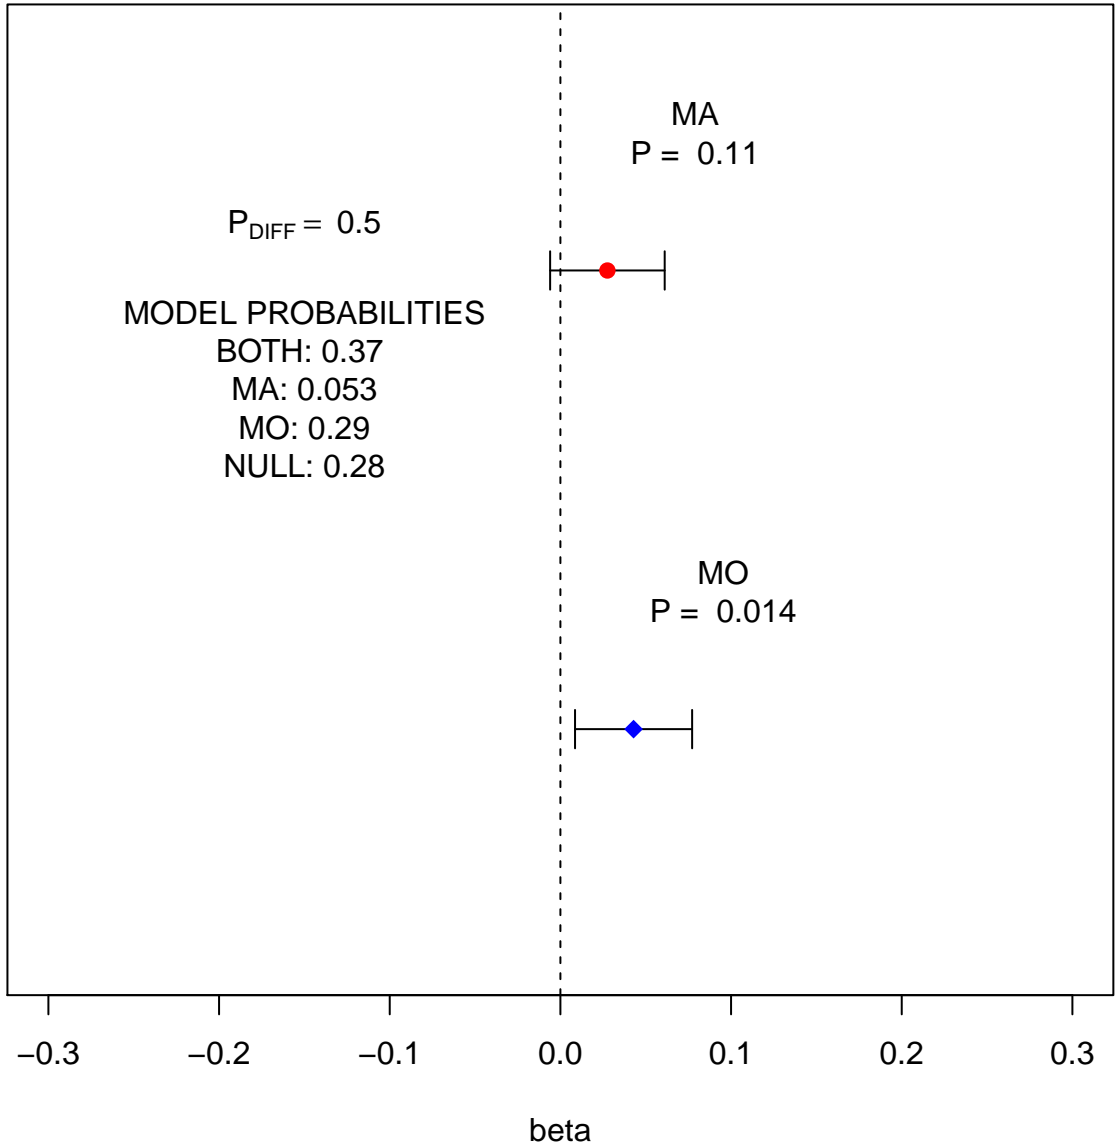

# RNF213 (rs8077768)

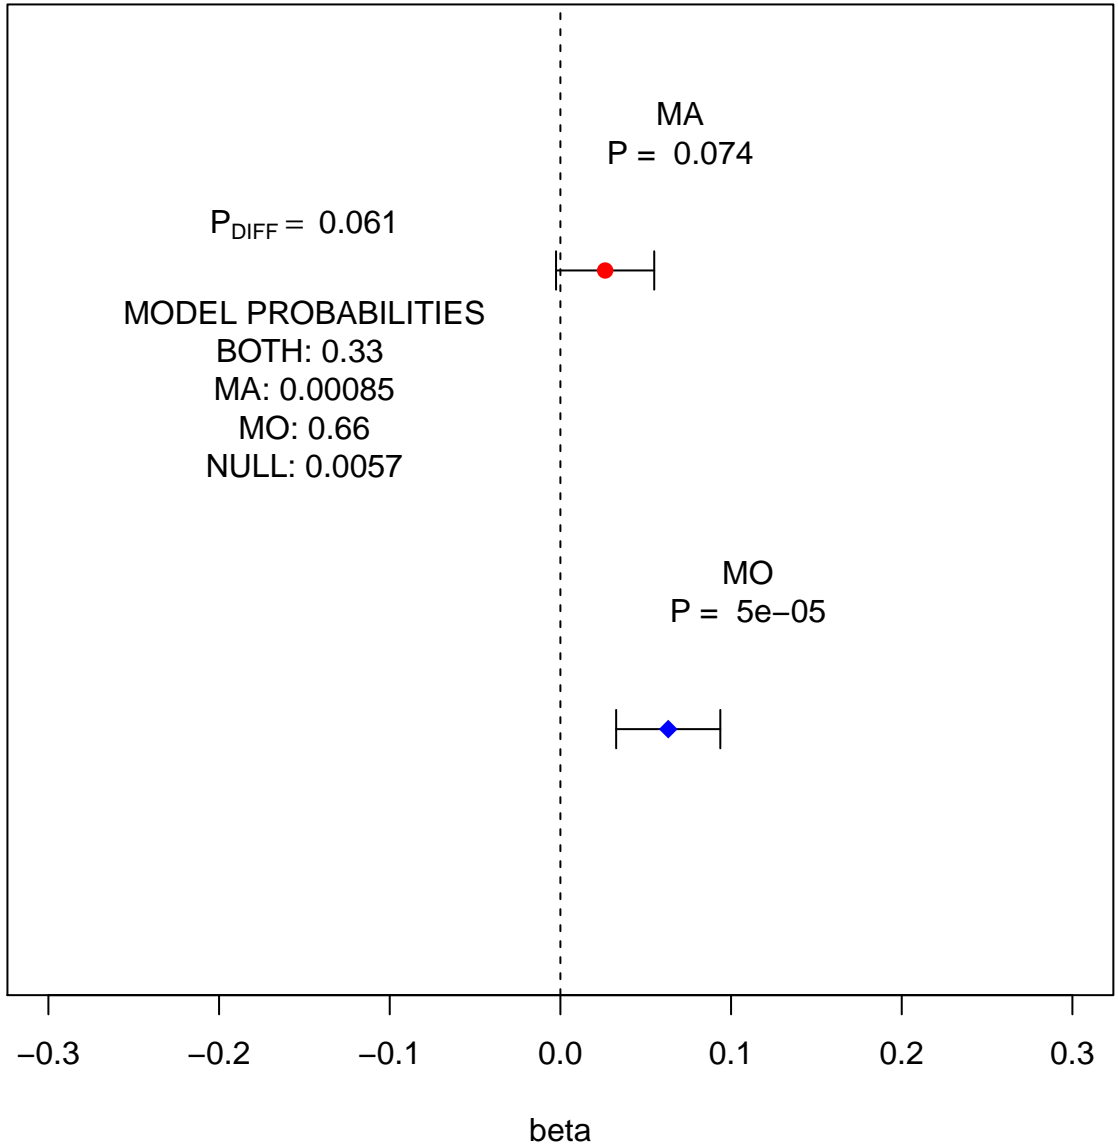

# near RBBP8 (rs7506921)

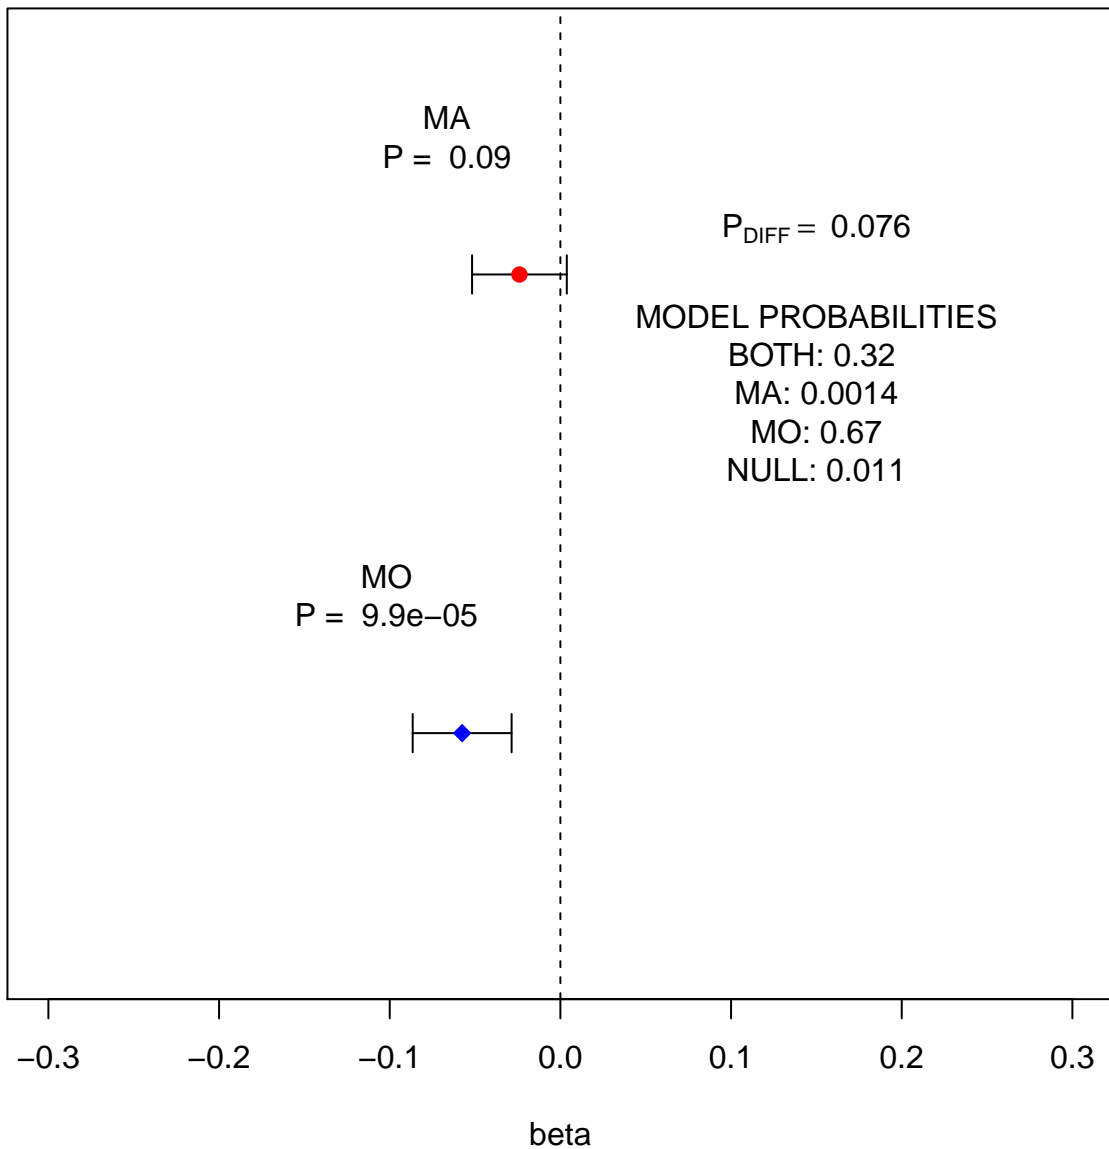

# near SKOR2 (rs1019990)

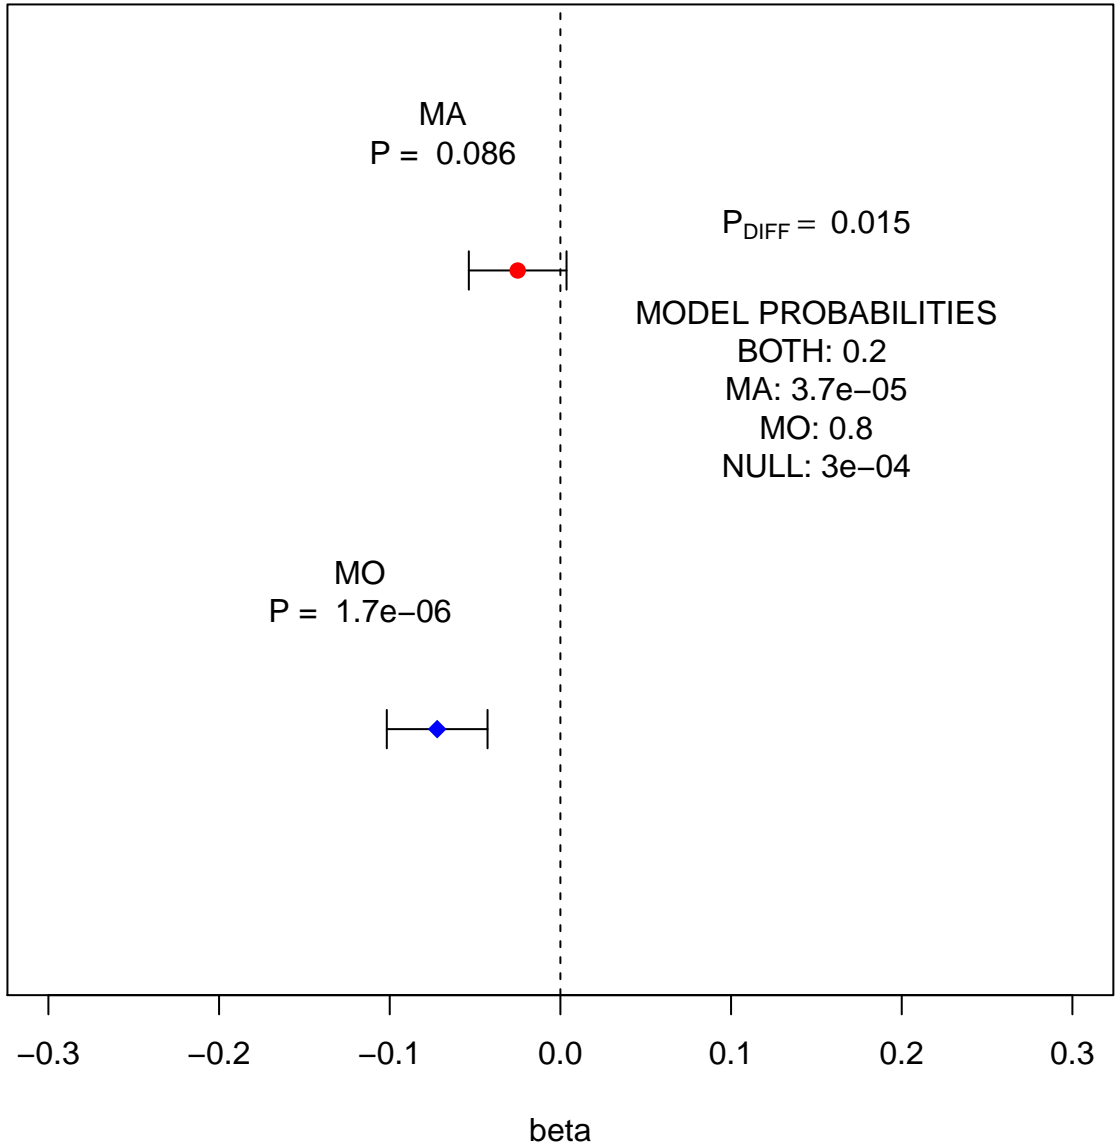

# near FECH (rs8087942)

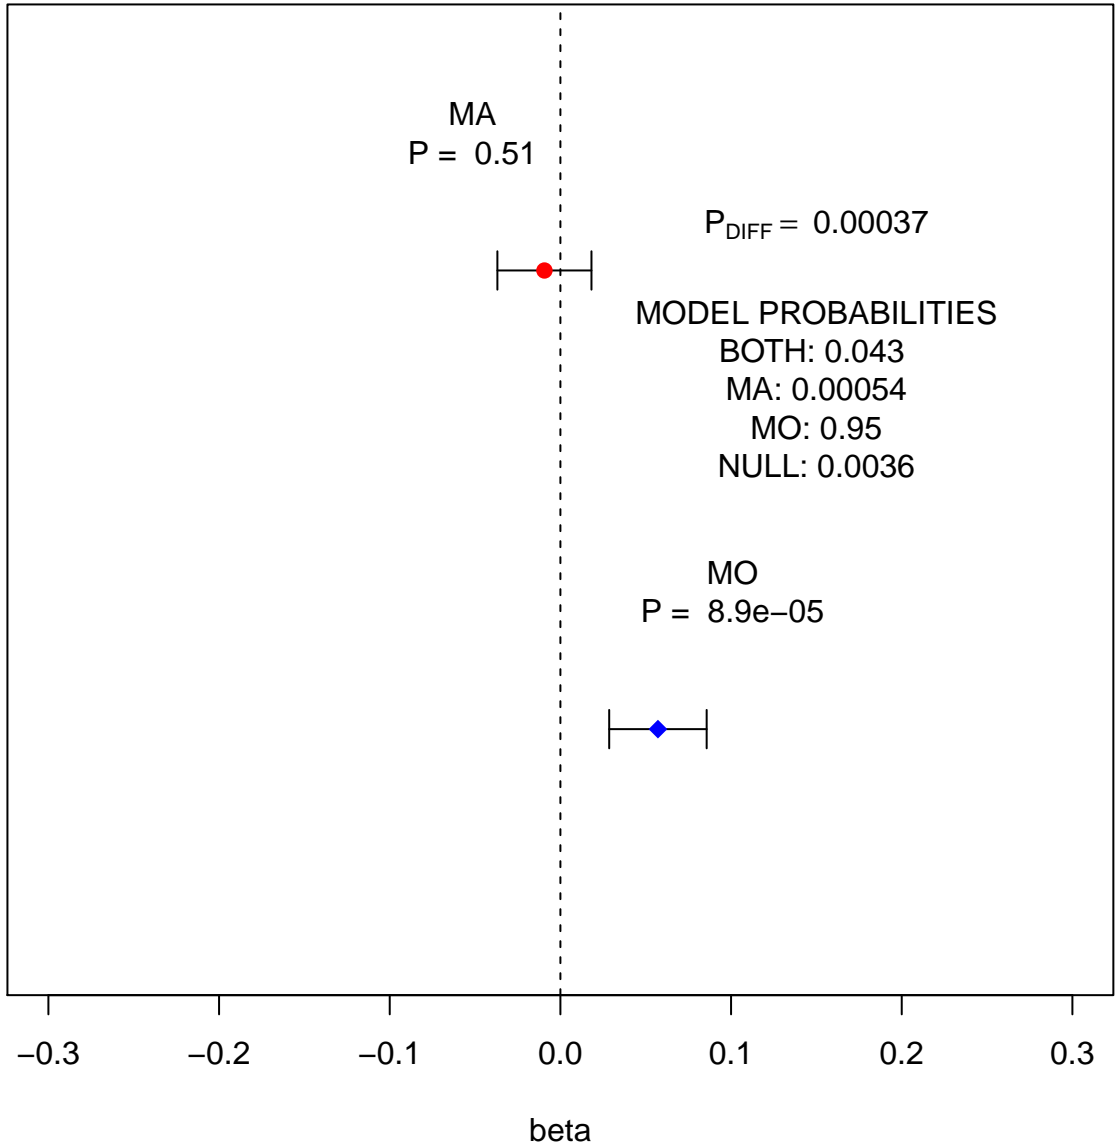

# CACNA1A (rs10405121)

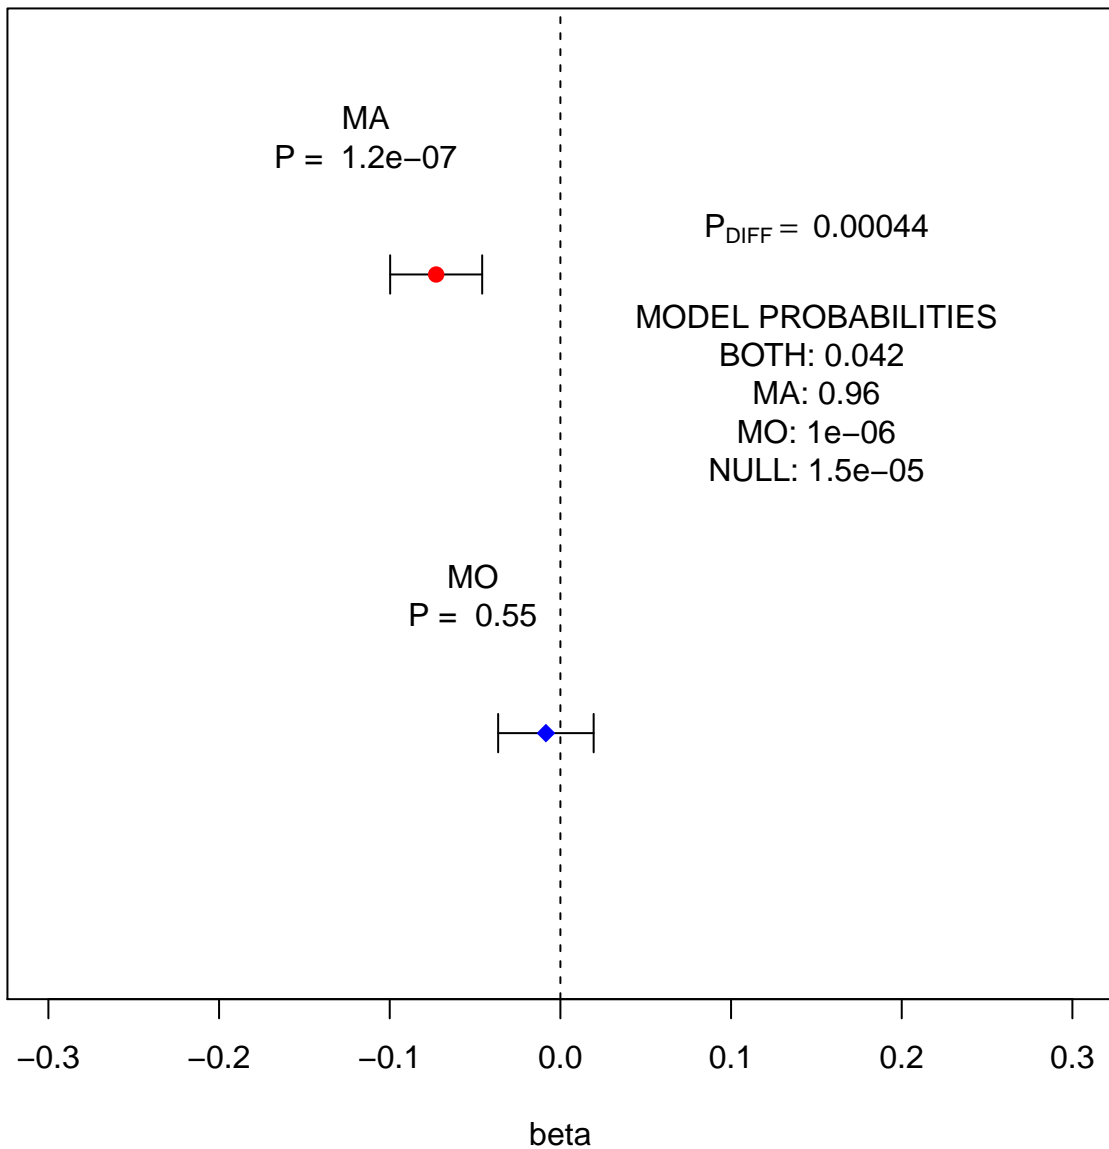



# SUGP1 (rs74182632)

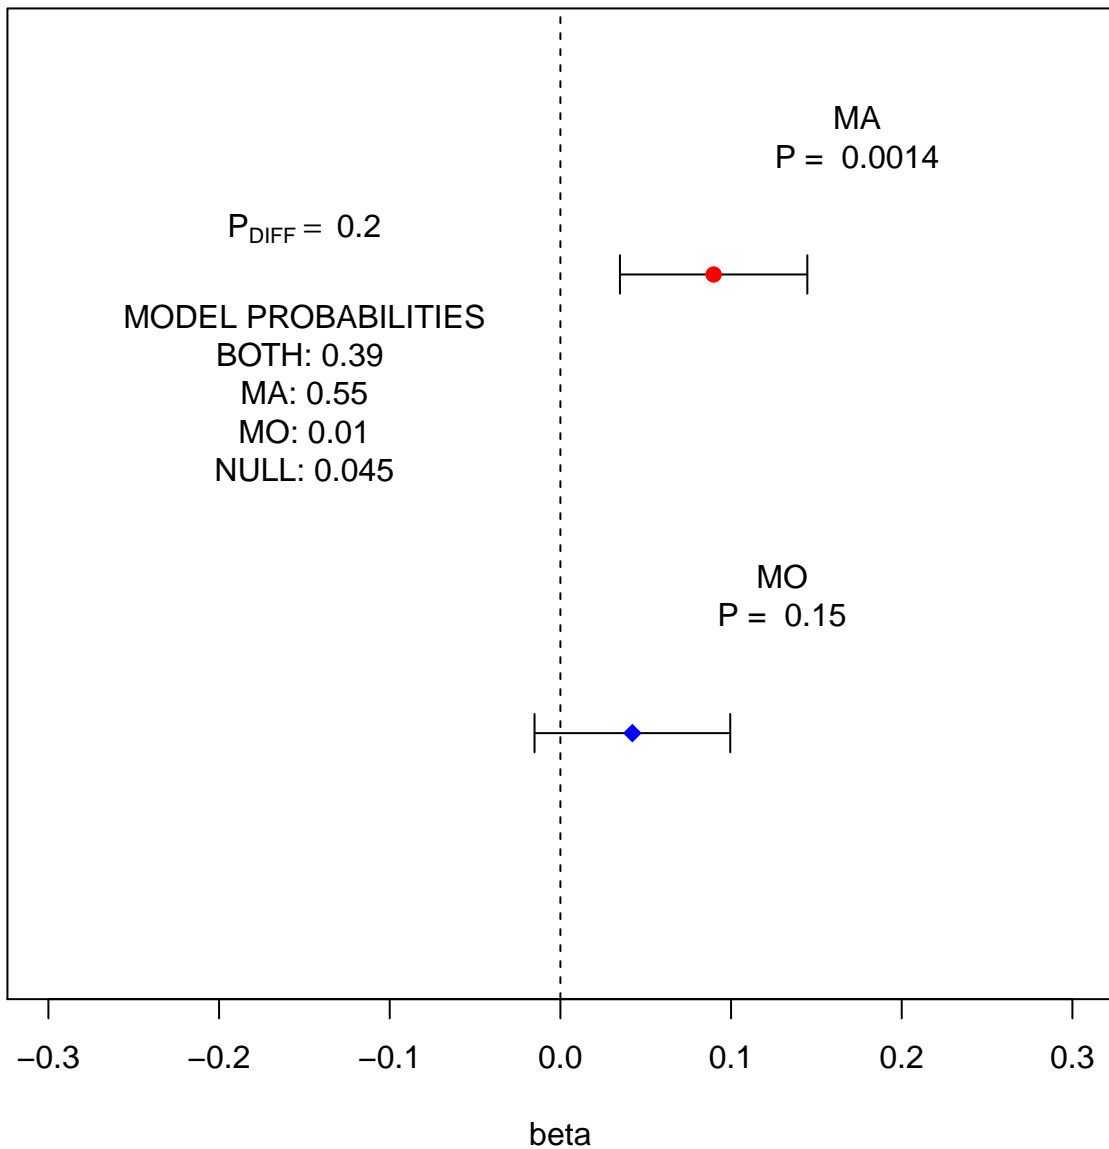

# B9D2|TMEM91 (rs1982072)

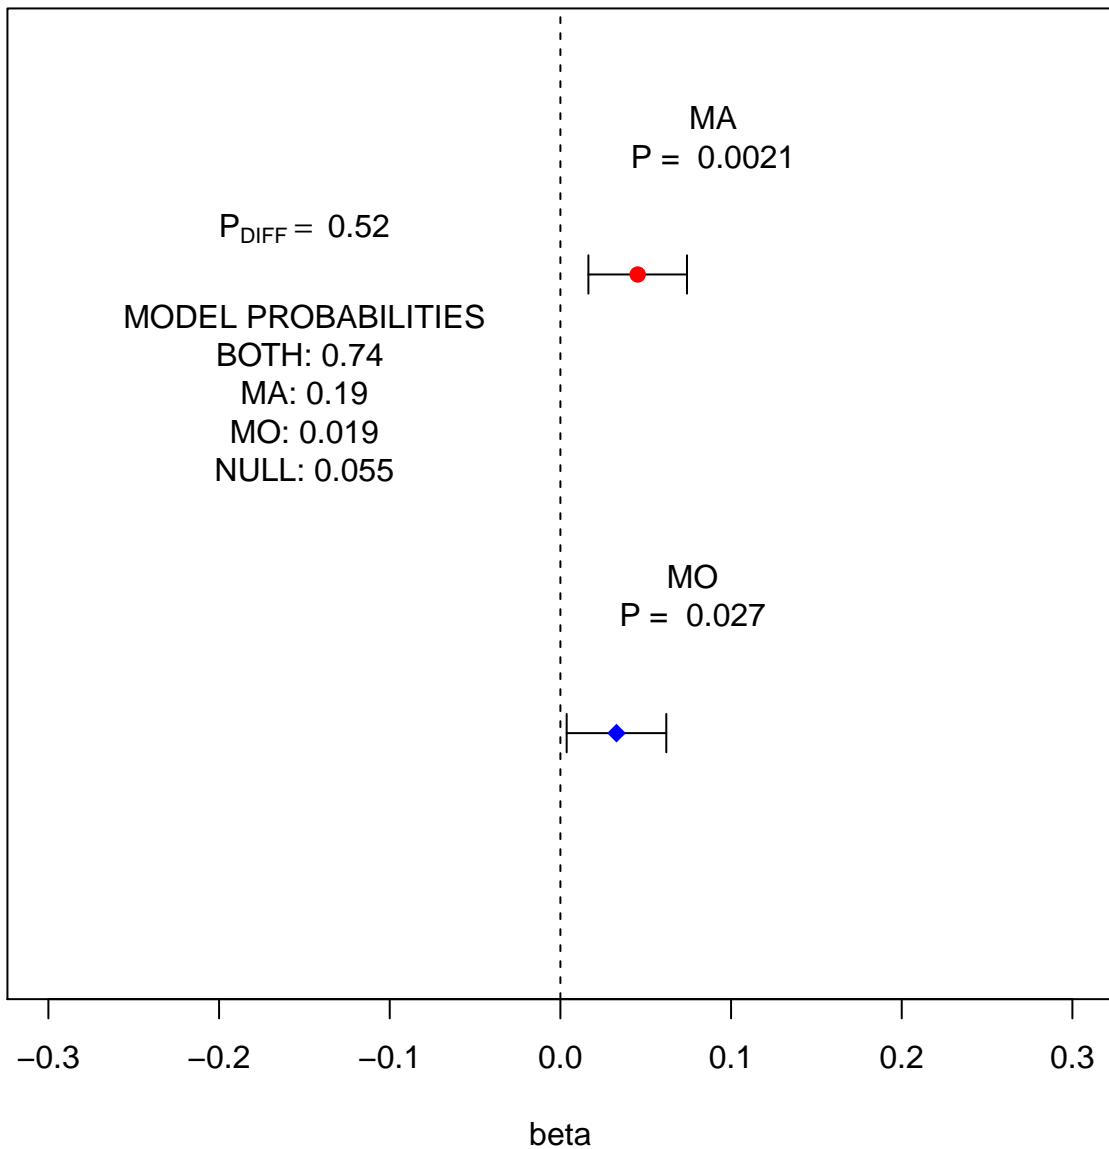

# near JAG1 (rs111404218)

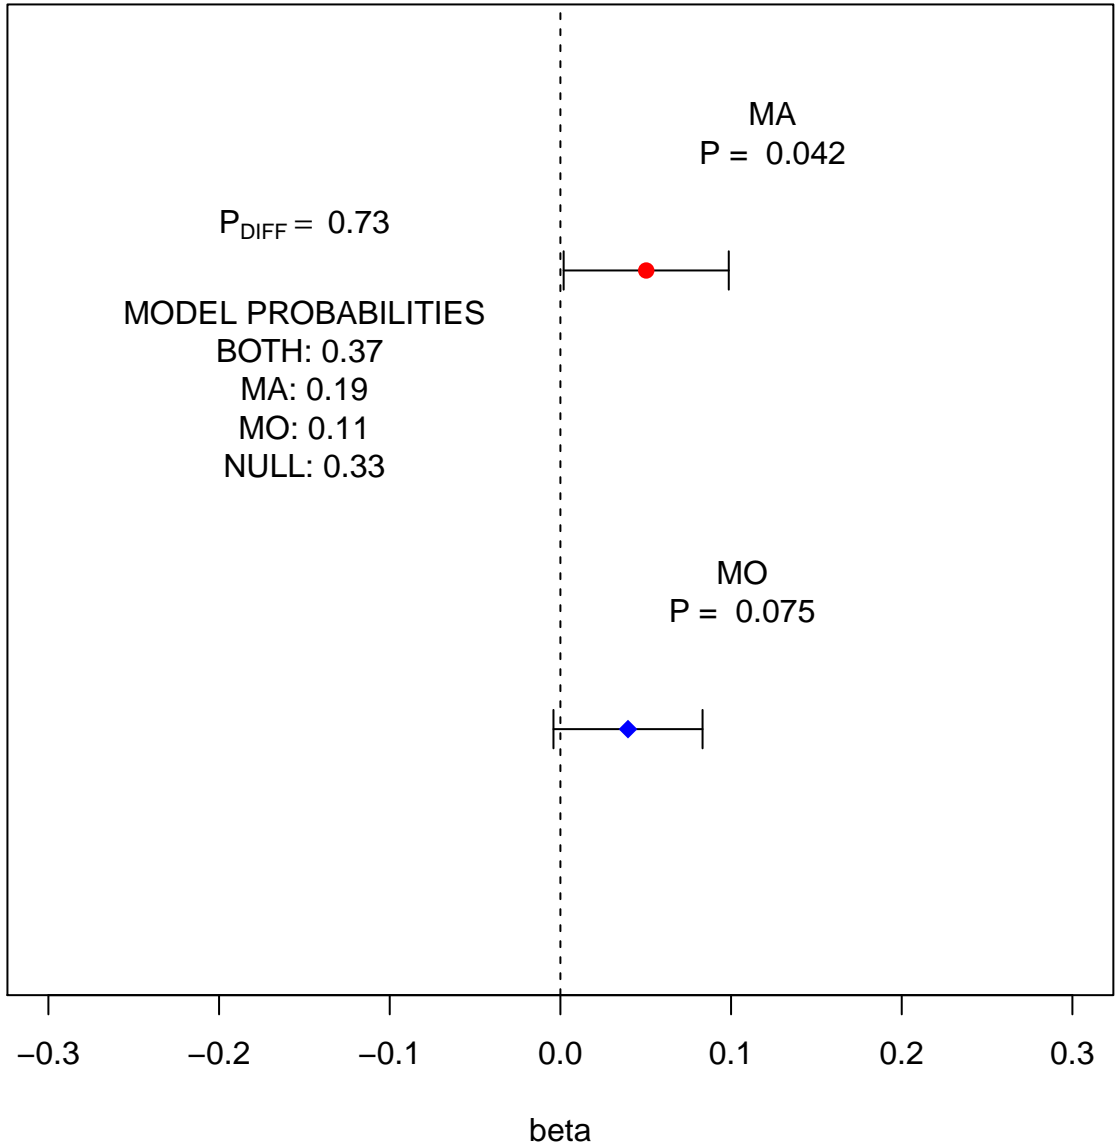

# SLC24A3 (rs4814864)

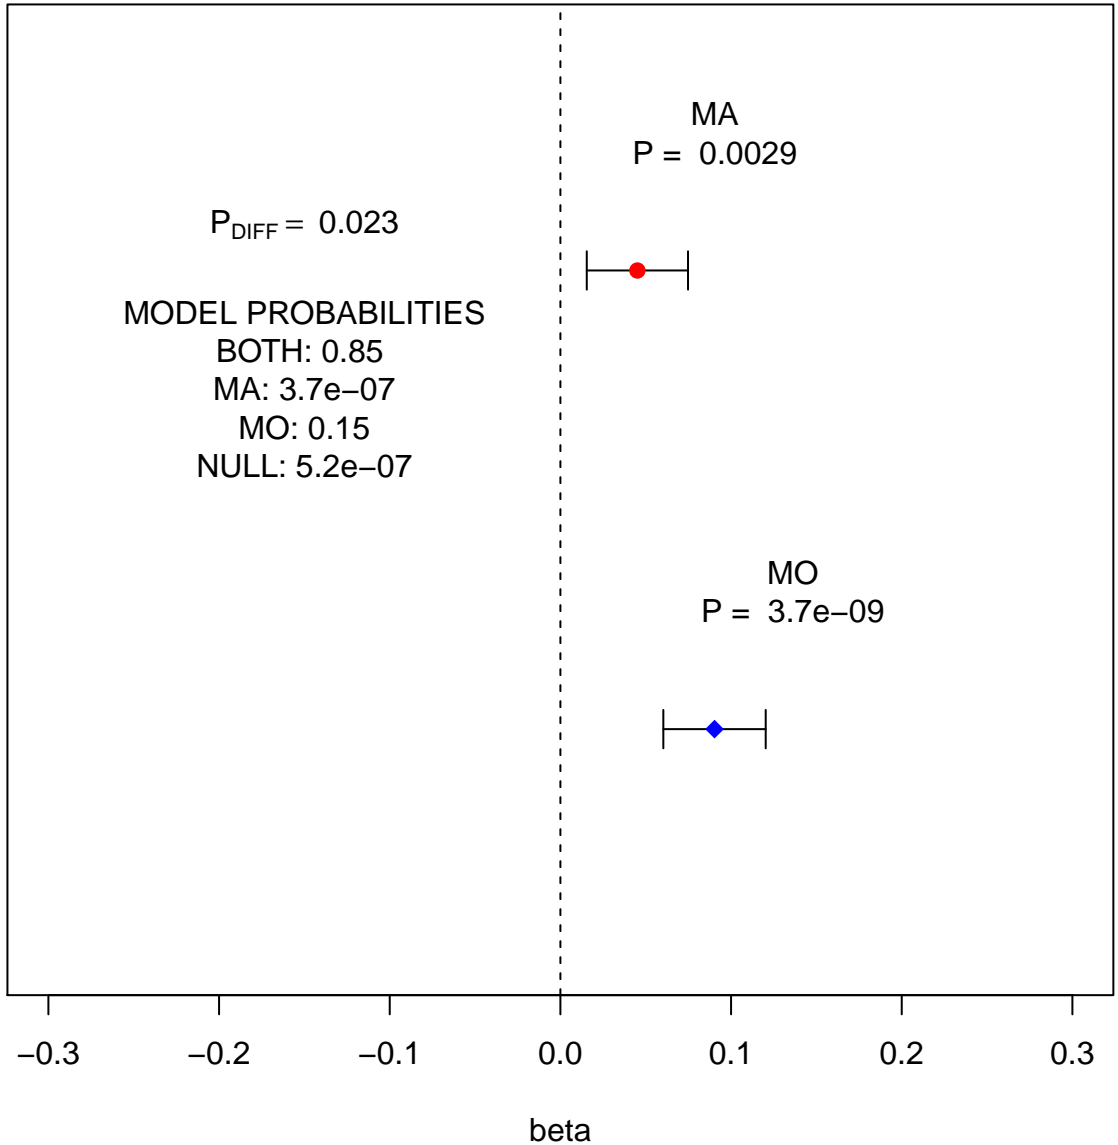

# C20orf112 (rs6057599)

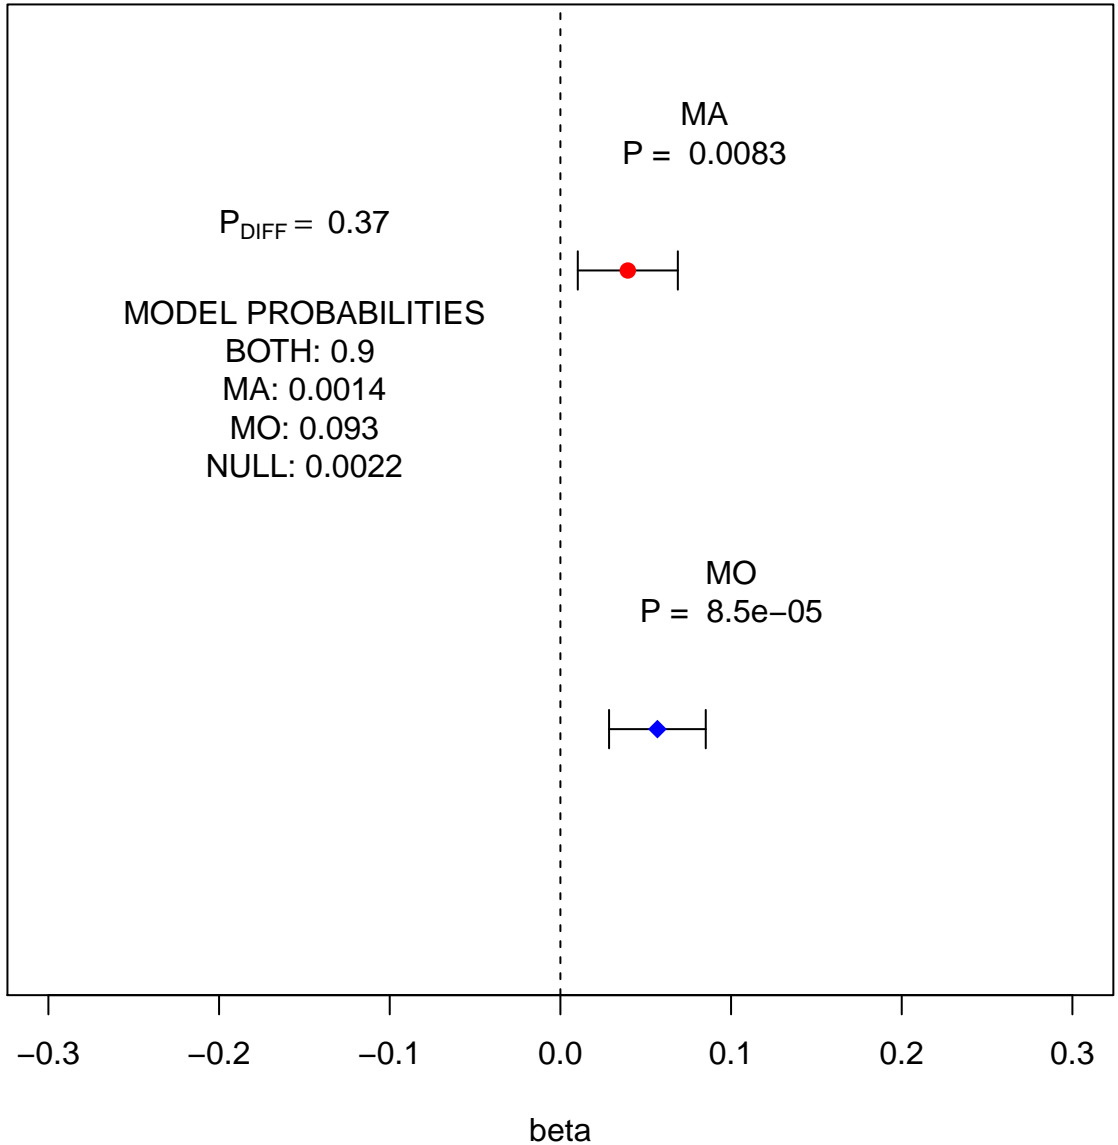

# ZMYND8 (rs910187)

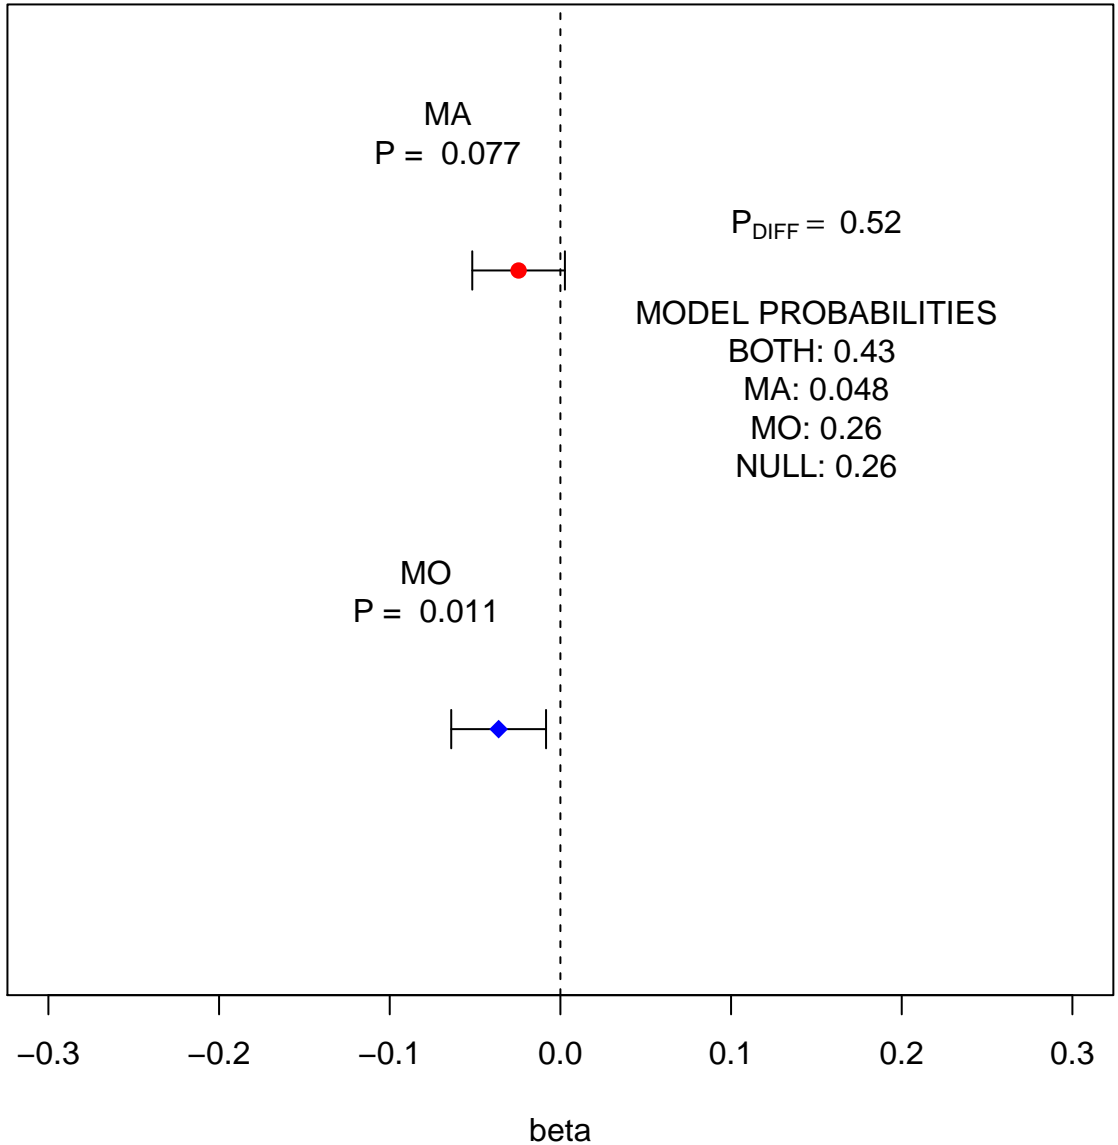

# near MRPS6 (rs28451064)

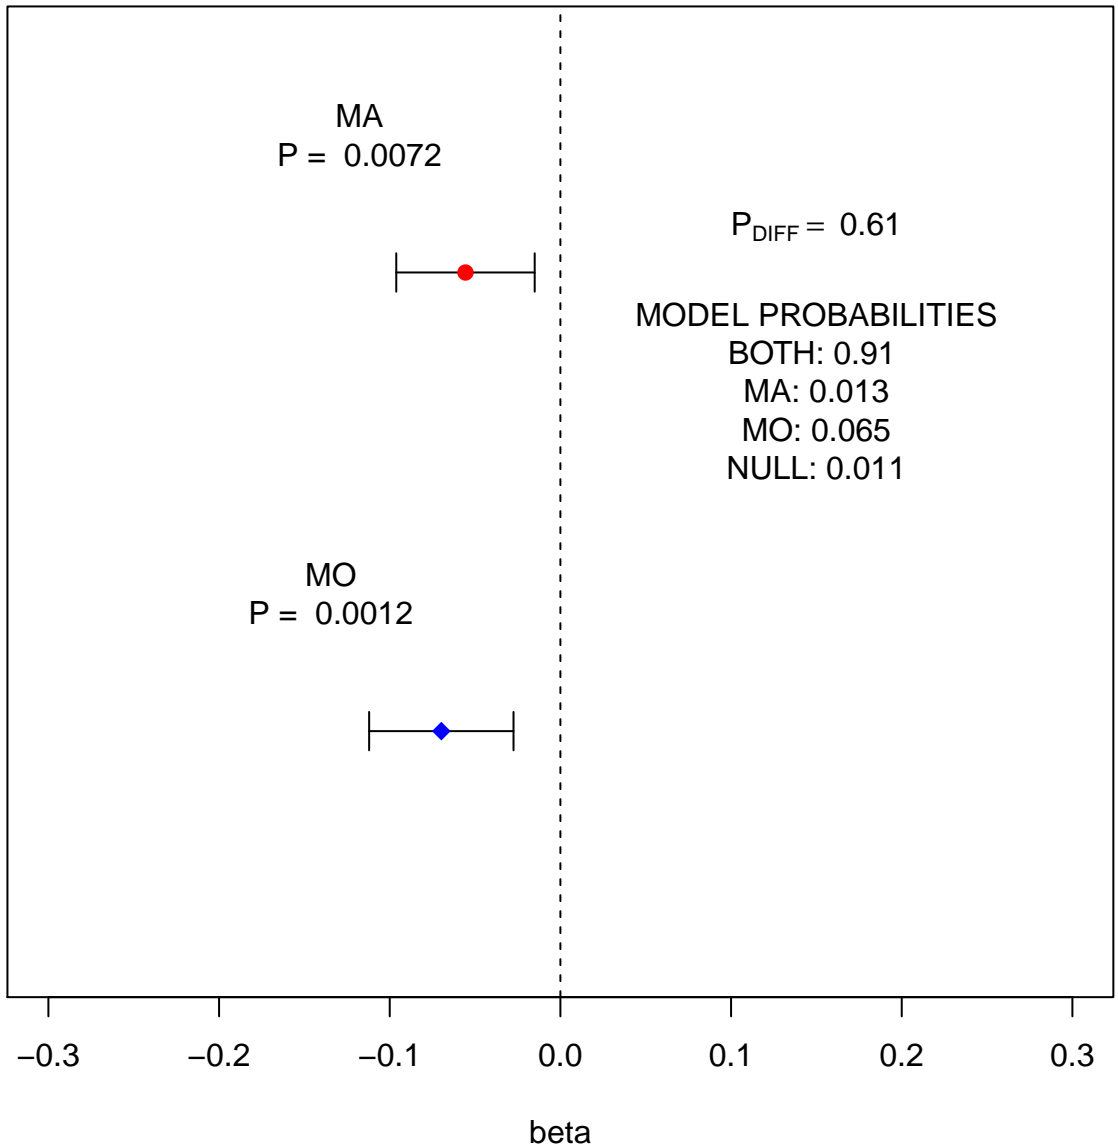

# RUNX1 (rs764508)

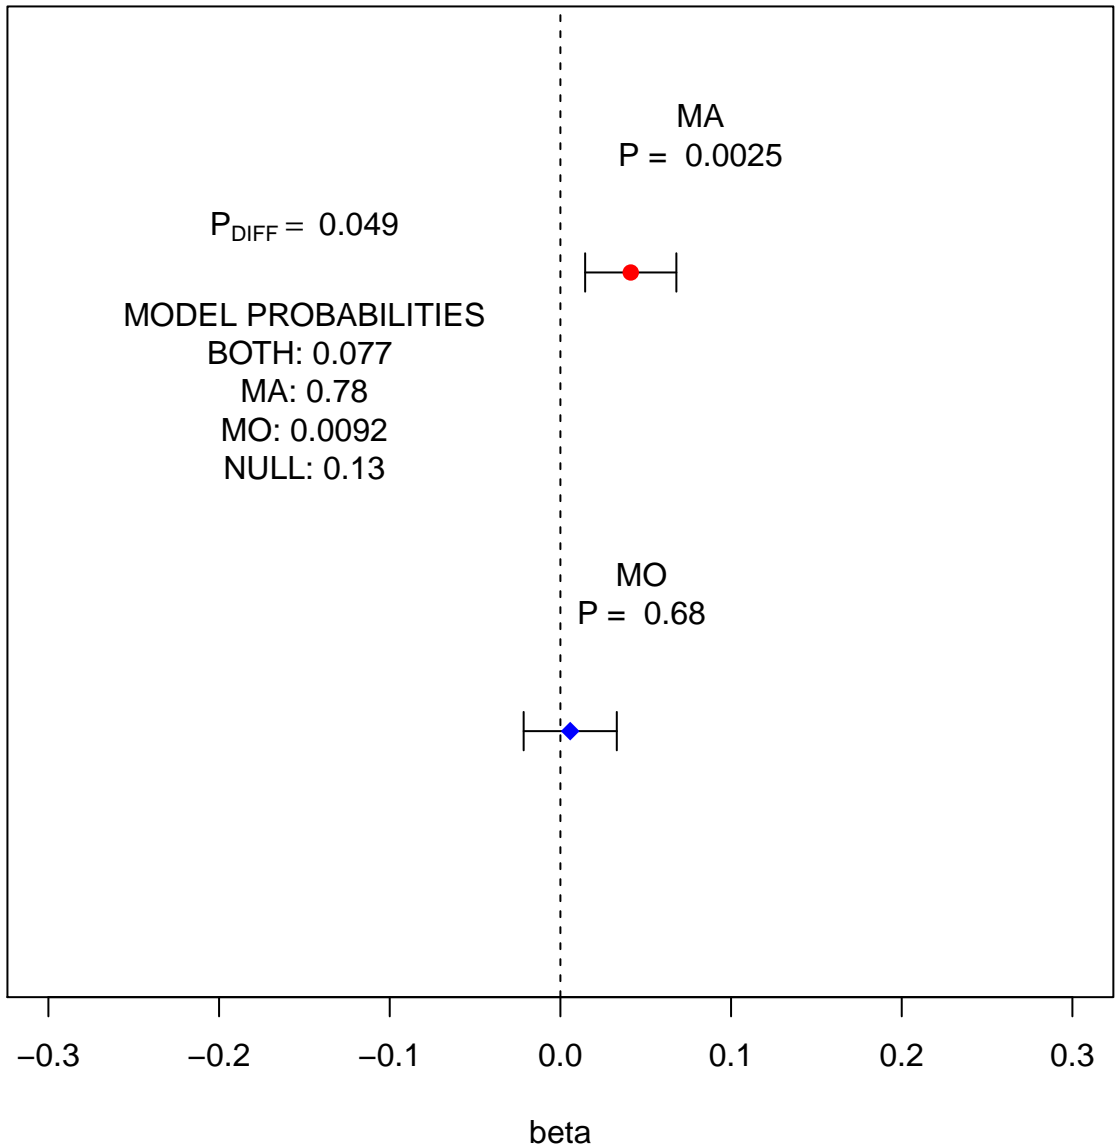



near AC006547.14 (rs625686)

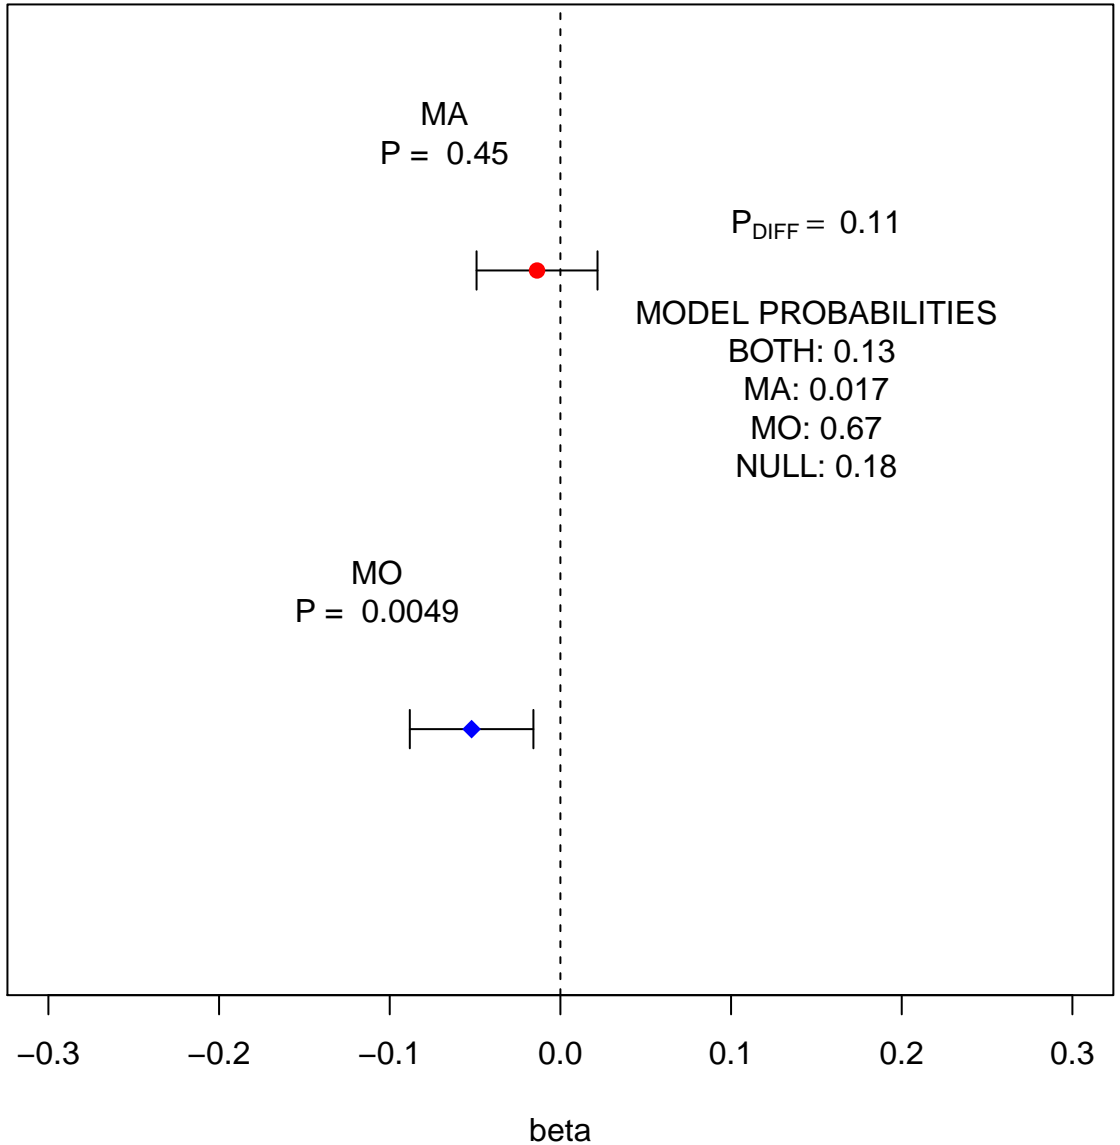

# near FAM47A (rs1507220)

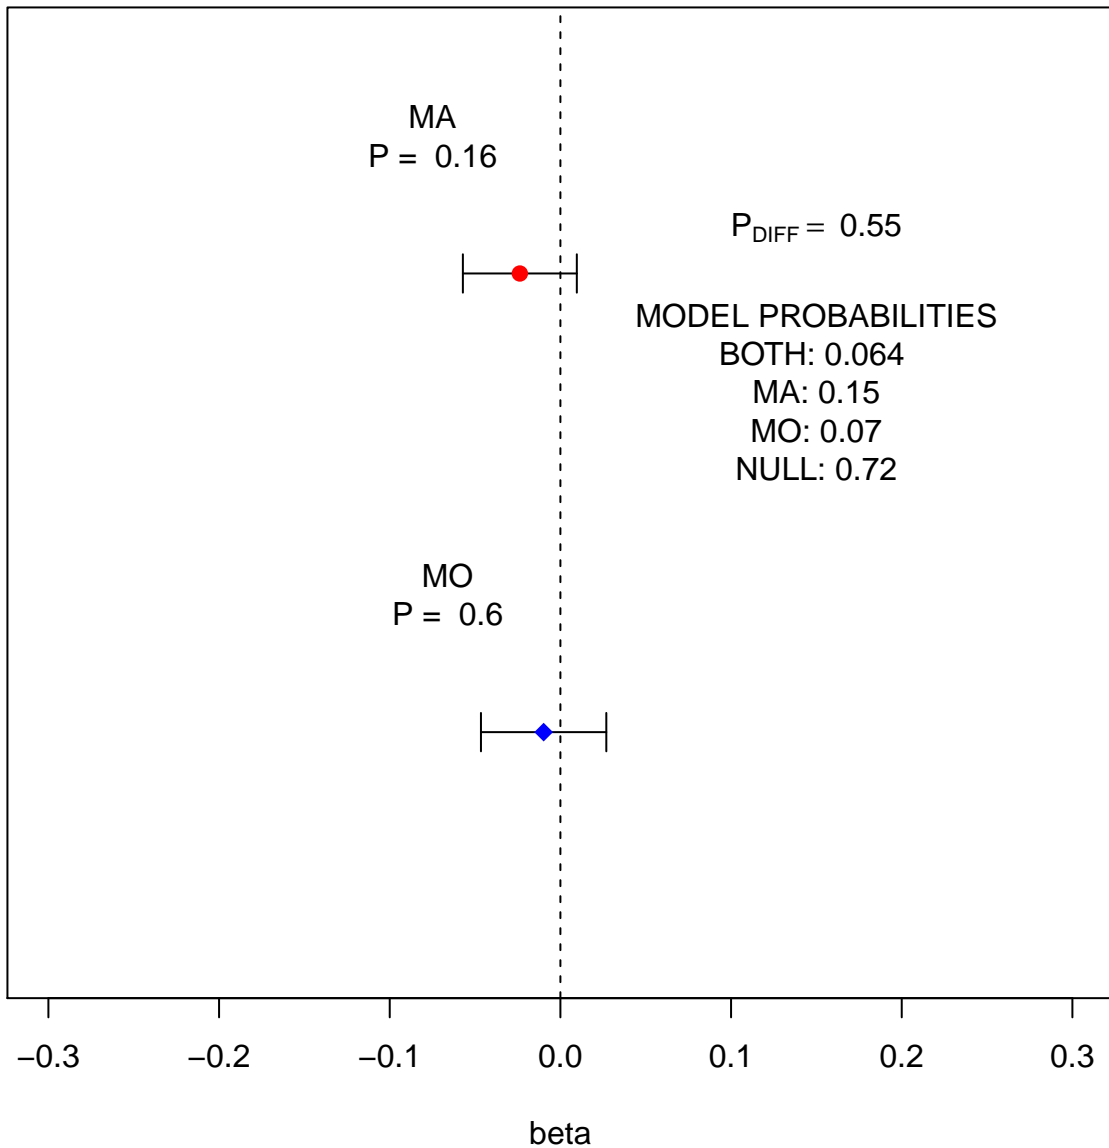

# near MED14 (rs4403550)

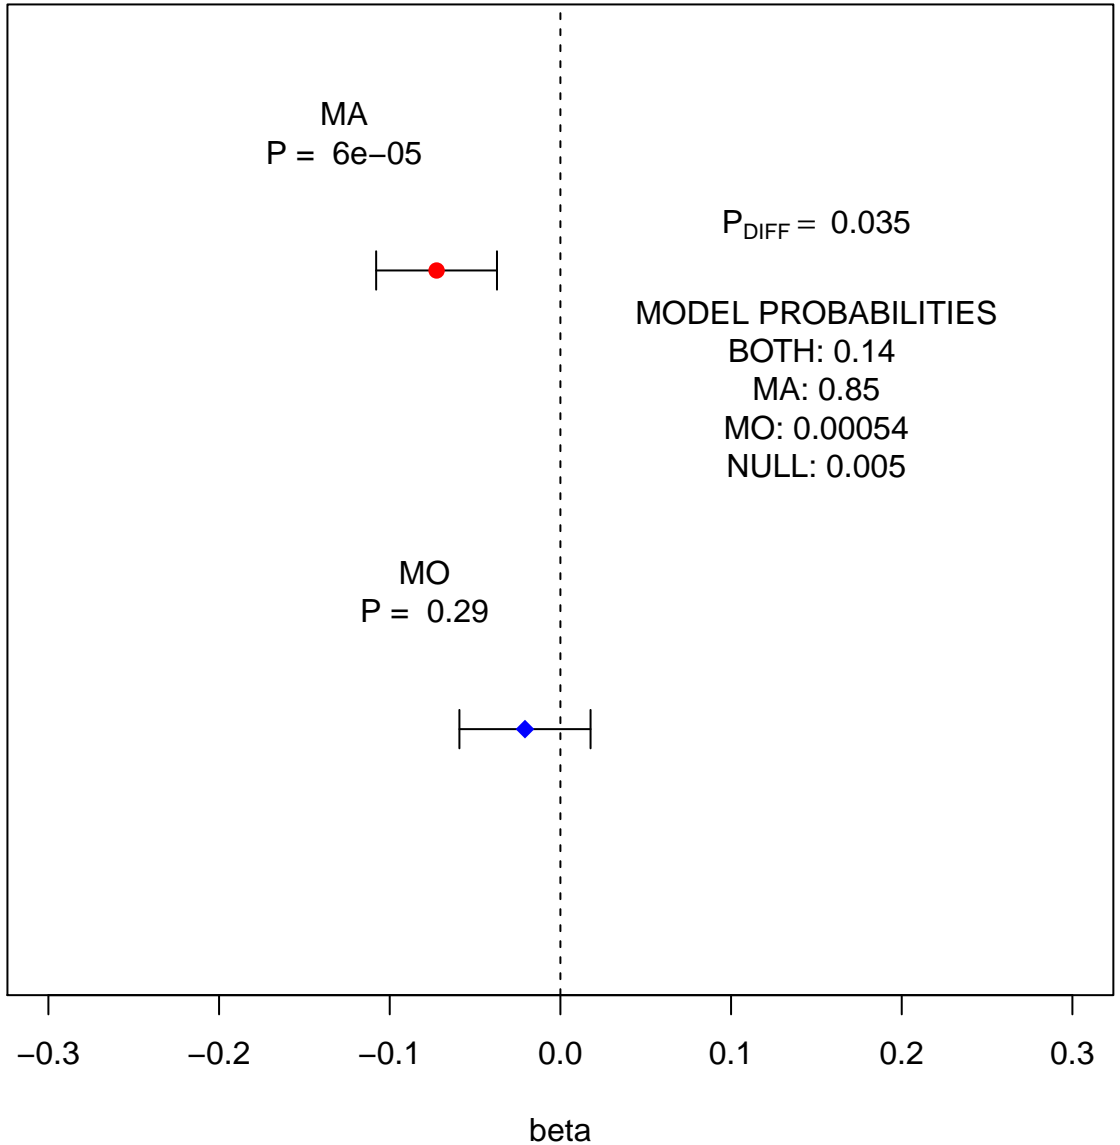

Supplement: Supplementary file [file media-8.pdf]
