# Supplementary material for: Genome-wide analysis of 102,084 migraine cases identifies 123 risk loci and subtype-specific risk alleles
Source: bioRxiv or medRxiv preprint supplement (doi:10.1101/2021.01.20.21249647), 2021-01-25

**GO\_NEUROGENESIS (SET1)**  
(no. genes = 1565, outside 95% conf. band = 81.3%)

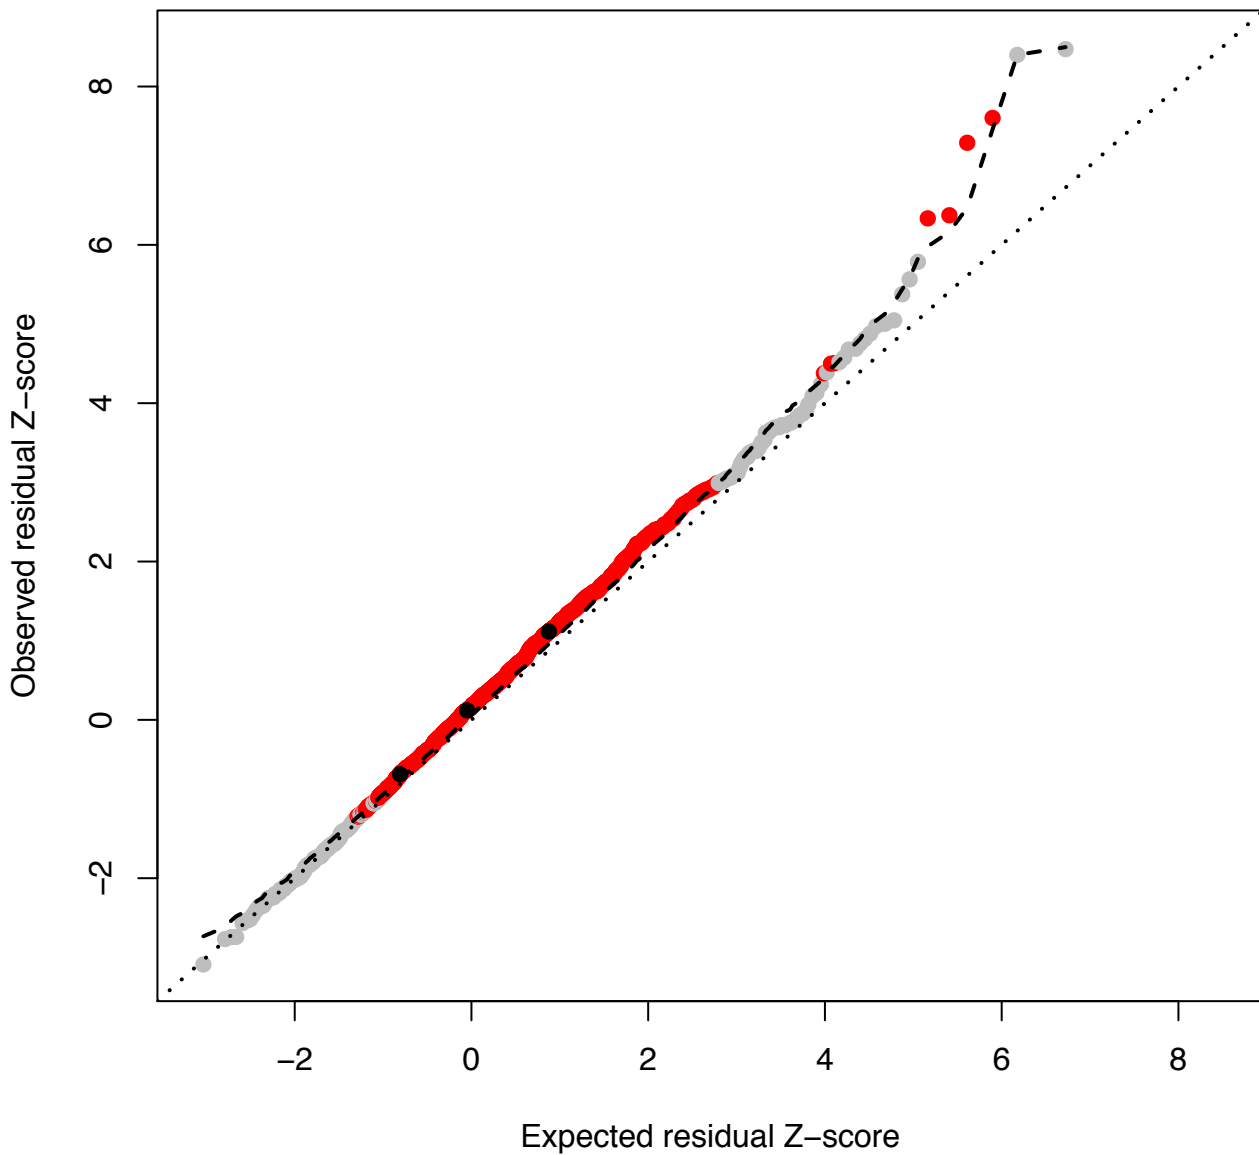

**GO\_NEGATIVE\_REGULATION\_OF\_SIGNALING (SET2)**  
(no. genes = 1305, outside 95% conf. band = 96.2%)

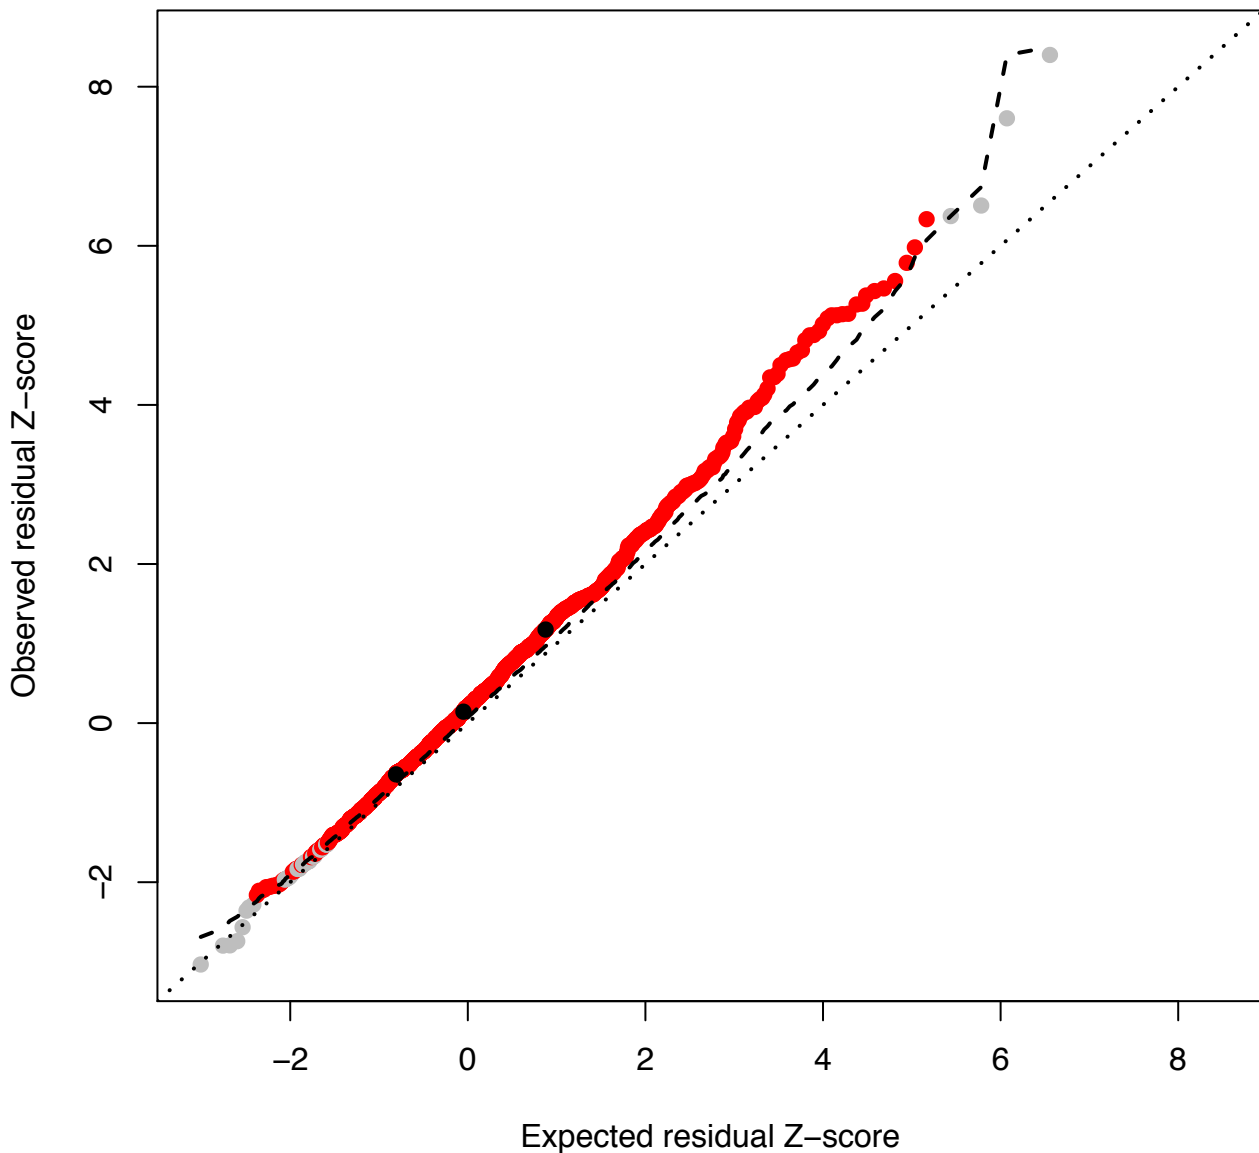

**GO\_SCHWANN\_CELL\_MIGRATION (SET3)**  
(no. genes = 3, outside 95% conf. band = 66.7%)

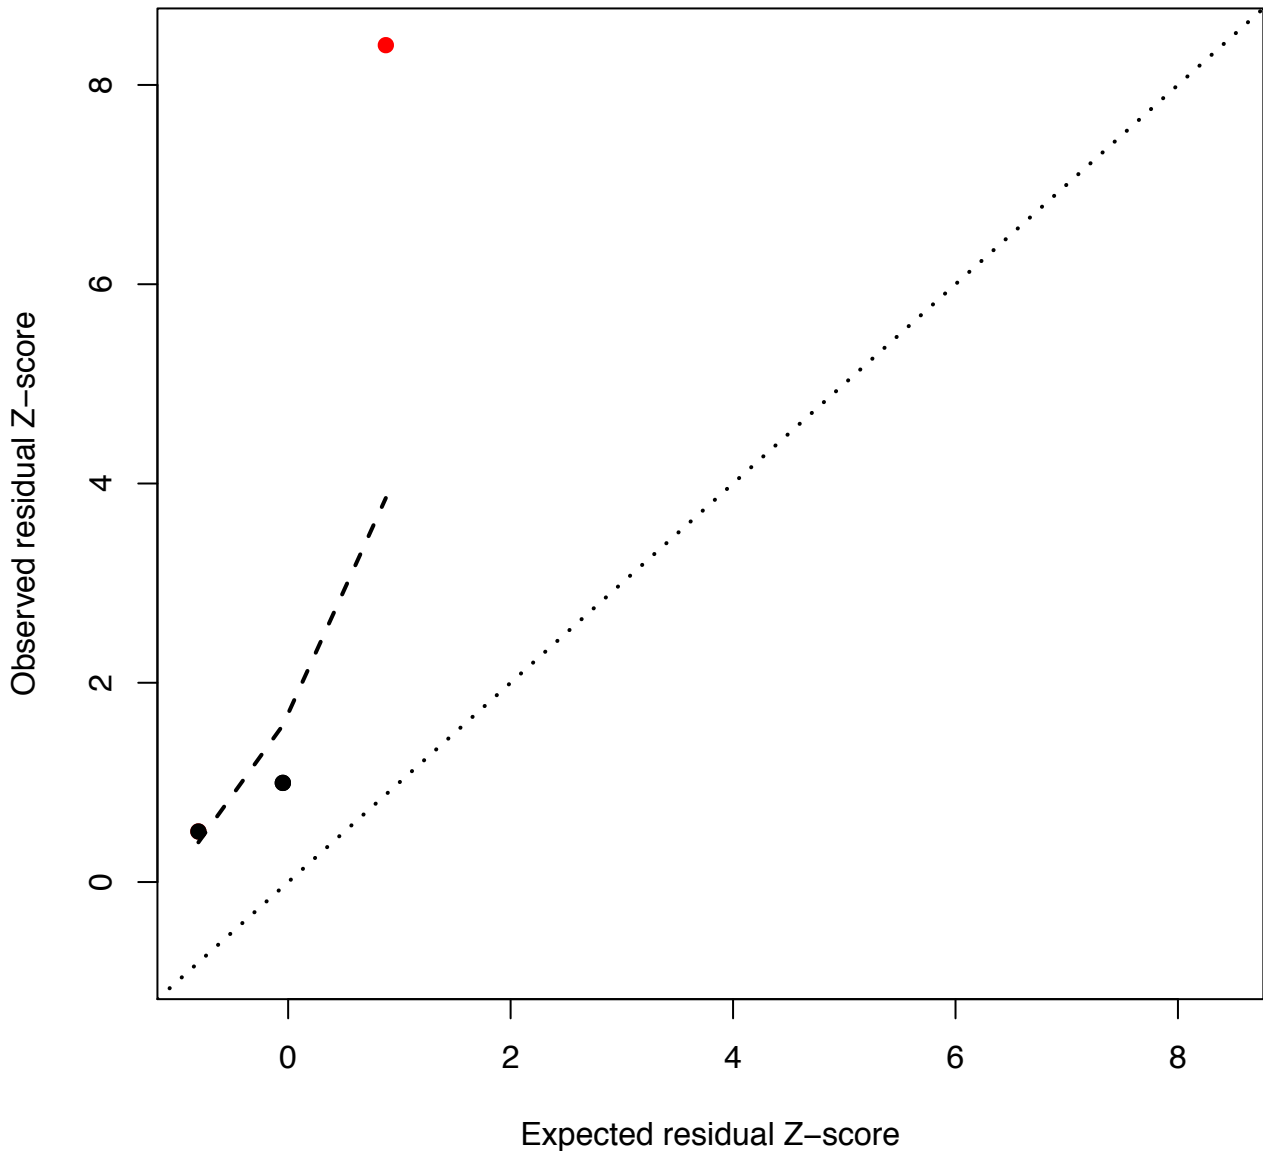

**PID\_UPA\_UPAR\_PATHWAY (SET1)**  
(no. genes = 42, outside 95% conf. band = 76.2%)

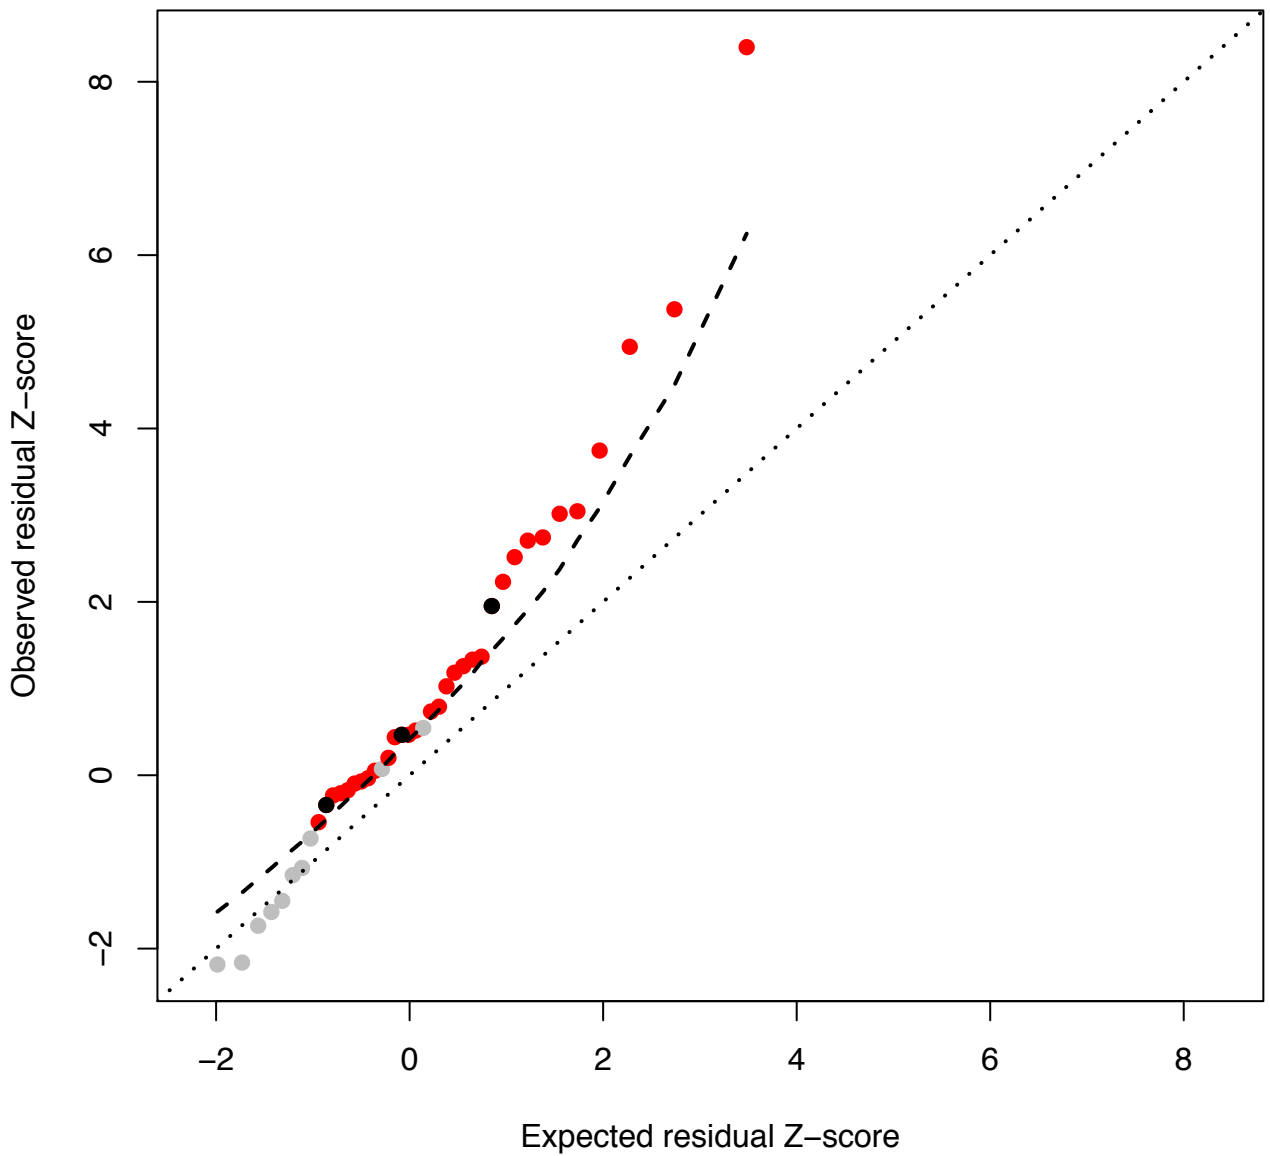

**NIKOLSKY\_BREAST\_CANCER\_1Q32\_AMPLICON (SET2)**  
(no. genes = 12, outside 95% conf. band = 91.7%)

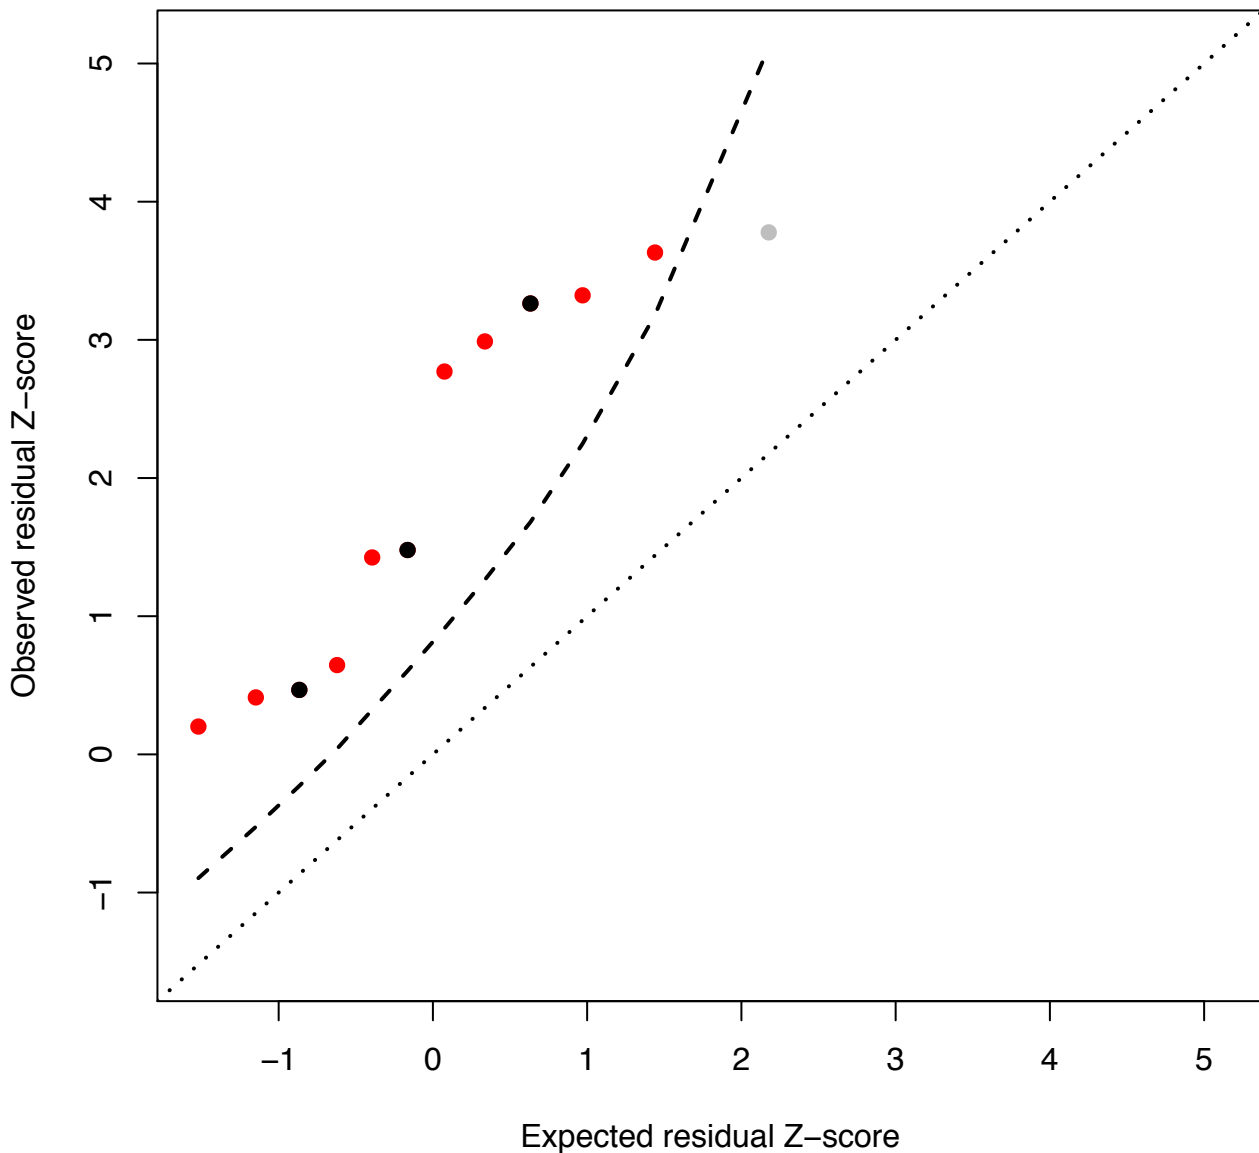

Supplement: Supplementary file [file media-10.pdf]
